# Supplementary material for: An engineered transcriptional reporter of protein localization identifies regulators of mitochondrial and ER membrane protein trafficking in high-throughput CRISPRi screens
Source: eLife. 2021 Aug 20;10:e69142. doi: 10.7554/eLife.69142 (PMC8423448; doi:10.7554/eLife.69142)
Supplement: Figure 1—figure supplement 5—source data 1. [file elife-69142-fig1-figsupp5-data1.xlsx]

## Sheet: Fig 1 - S5
Well	Sample Name	Target Name	Cт	Cт Mean	Cт SD	EXP
A1	Mito:ER protease 1:20	Mito protease	26.7737	26.7519	0.224564	2
B1	Mito:ER protease 1:20	Mito protease	26.5172	26.7519	0.224564	2
C1	Mito:ER protease 1:20	Mito protease	26.9648	26.7519	0.224564	2
D1	Mito:ER protease 1:20	ER protease	22.8678	22.8803	0.0359929	2
E1	Mito:ER protease 1:20	ER protease	22.8522	22.8803	0.0359929	2
F1	Mito:ER protease 1:20	ER protease	22.9209	22.8803	0.0359929	2
A2	Mito:ER protease 1:2	Mito protease	25.8299	25.7042	0.110621	2
B2	Mito:ER protease 1:2	Mito protease	25.6607	25.7042	0.110621	2
C2	Mito:ER protease 1:2	Mito protease	25.6219	25.7042	0.110621	2
D2	Mito:ER protease 1:2	ER protease	24.762	24.5181	0.344938	2
F2	Mito:ER protease 1:2	ER protease	24.2742	24.5181	0.344938	2
A3	Mito:ER protease 5:1	Mito protease	22.9686	22.9324	0.0362254	2
B3	Mito:ER protease 5:1	Mito protease	22.9325	22.9324	0.0362254	2
C3	Mito:ER protease 5:1	Mito protease	22.8962	22.9324	0.0362254	2
E3	Mito:ER protease 5:1	ER protease	25.4293	25.4278	0.00214443	2
F3	Mito:ER protease 5:1	ER protease	25.4263	25.4278	0.00214443	2
A4	Mito:ER protease 50:1	Mito protease	23.8916	23.9388	0.137804	2
B4	Mito:ER protease 50:1	Mito protease	24.094	23.9388	0.137804	2
C4	Mito:ER protease 50:1	Mito protease	23.8308	23.9388	0.137804	2
D4	Mito:ER protease 50:1	ER protease	28.1024	28.2313	0.205933	2
E4	Mito:ER protease 50:1	ER protease	28.4688	28.2313	0.205933	2
F4	Mito:ER protease 50:1	ER protease	28.1227	28.2313	0.205933	2
A5	Mito:ER protease Pre-sort 1:20	Mito protease	26.0376	26.0195	0.139819	2
B5	Mito:ER protease Pre-sort 1:20	Mito protease	25.8715	26.0195	0.139819	2
C5	Mito:ER protease Pre-sort 1:20	Mito protease	26.1494	26.0195	0.139819	2
D5	Mito:ER protease Pre-sort 1:20	ER protease	21.7528	21.7642	0.156508	2
E5	Mito:ER protease Pre-sort 1:20	ER protease	21.6137	21.7642	0.156508	2
F5	Mito:ER protease Pre-sort 1:20	ER protease	21.9261	21.7642	0.156508	2
A6	Mito:ER protease Post-sort	Mito protease	24.2886	24.616	0.316662	2
B6	Mito:ER protease Post-sort	Mito protease	24.9207	24.616	0.316662	2
C6	Mito:ER protease Post-sort	Mito protease	24.6386	24.616	0.316662	2
D6	Mito:ER protease Post-sort	ER protease	28.4973	28.4688	0.0403706	2
E6	Mito:ER protease Post-sort	ER protease	28.4402	28.4688	0.0403706	2
