# Supplementary material for: An engineered transcriptional reporter of protein localization identifies regulators of mitochondrial and ER membrane protein trafficking in high-throughput CRISPRi screens
Source: eLife. 2021 Aug 20;10:e69142. doi: 10.7554/eLife.69142 (PMC8423448; doi:10.7554/eLife.69142)
Supplement: Figure 1—source data 1. [file elife-69142-fig1-data1.xlsx]

## Sheet: Fig 1F
Well	Sample Name	Target Name	Cт	Cт Mean	Cт SD	Exponent
A1	Mito:Cyto protease 1:20	Mito Protease	25.2692	25.0574	0.183404	2
B1	Mito:Cyto protease 1:20	Mito Protease	24.9509	25.0574	0.183404	2
C1	Mito:Cyto protease 1:20	Mito Protease	24.9522	25.0574	0.183404	2
D1	Mito:Cyto protease 1:20	Cyto Protease	20.3054	20.3681	0.0550294	2
E1	Mito:Cyto protease 1:20	Cyto Protease	20.4087	20.3681	0.0550294	2
F1	Mito:Cyto protease 1:20	Cyto Protease	20.3901	20.3681	0.0550294	2
A2	Mito:Cyto protease 1:2	Mito Protease	23.5017	23.5608	0.0544293	2
B2	Mito:Cyto protease 1:2	Mito Protease	23.5717	23.5608	0.0544293	2
C2	Mito:Cyto protease 1:2	Mito Protease	23.6089	23.5608	0.0544293	2
D2	Mito:Cyto protease 1:2	Cyto Protease	22.3429	22.355	0.0170476	2
F2	Mito:Cyto protease 1:2	Cyto Protease	22.367	22.355	0.0170476	2
A3	Mito:Cyto protease 5:1	Mito Protease	22.3575	22.376	0.0201198	2
B3	Mito:Cyto protease 5:1	Mito Protease	22.373	22.376	0.0201198	2
C3	Mito:Cyto protease 5:1	Mito Protease	22.3974	22.376	0.0201198	2
D3	Mito:Cyto protease 5:1	Cyto Protease	24.813	24.8363	0.0226089	2
E3	Mito:Cyto protease 5:1	Cyto Protease	24.8376	24.8363	0.0226089	2
F3	Mito:Cyto protease 5:1	Cyto Protease	24.8582	24.8363	0.0226089	2
A4	Mito:Cyto protease 50:1	Mito Protease	22.1734	22.2511	0.0731679	2
B4	Mito:Cyto protease 50:1	Mito Protease	22.3187	22.2511	0.0731679	2
C4	Mito:Cyto protease 50:1	Mito Protease	22.2612	22.2511	0.0731679	2
D4	Mito:Cyto protease 50:1	Cyto Protease	27.3932	27.2273	0.1657	2
E4	Mito:Cyto protease 50:1	Cyto Protease	27.2269	27.2273	0.1657	2
F4	Mito:Cyto protease 50:1	Cyto Protease	27.0618	27.2273	0.1657	2
A5	Pre-sort (1:20)	Mito Protease	26.0963	26.1653	0.0598252	2
B5	Pre-sort (1:20)	Mito Protease	26.2001	26.1653	0.0598252	2
C5	Pre-sort (1:20)	Mito Protease	26.1997	26.1653	0.0598252	2
D5	Pre-sort (1:20)	Cyto Protease	21.7907	21.8305	0.0856319	2
E5	Pre-sort (1:20)	Cyto Protease	21.7721	21.8305	0.0856319	2
F5	Pre-sort (1:20)	Cyto Protease	21.9288	21.8305	0.0856319	2
A6	Post-sort	Mito Protease	24.4327	24.6449	0.249054	2
B6	Post-sort	Mito Protease	24.9191	24.6449	0.249054	2
C6	Post-sort	Mito Protease	24.583	24.6449	0.249054	2
E6	Post-sort	Cyto Protease	28.5427	28.5621	0.0274056	2
F6	Post-sort	Cyto Protease	28.5815	28.5621	0.0274056	2
