# Supplementary material for: An engineered transcriptional reporter of protein localization identifies regulators of mitochondrial and ER membrane protein trafficking in high-throughput CRISPRi screens
Source: eLife. 2021 Aug 20;10:e69142. doi: 10.7554/eLife.69142 (PMC8423448; doi:10.7554/eLife.69142)
Supplement: Figure 3—figure supplement 1—source data 1. [file elife-69142-fig3-figsupp1-data1.xlsx]

## Sheet: Fig 3 - S1
Experiment	sgRNA	Golgi_Area	G_mTA-Intensity	Mito_Area	M_mTA-Intensity
8_2	NT	24.8	2475.16	227.4	1774.8
8_2	NT	21.42	1868.09	200.11	1505.72
8_2	NT	25.78	2102.85	214.58	1841.04
8_2	NT	23.59	2565.07	197.42	2101.75
8_2	NT	30.24	3334.74	314.88	2616.33
8_2	NT	16.66	2323.9	242.81	1867.48
8_2	NT	18.29	1595.66	273.74	1044.05
8_2	NT	30.44	3966.27	147.68	3856.05
8_2	NT	22.36	4242.6	105.96	3366.25
8_2	NT	17.17	3694.71	161	2601.35
8_2	NT	14.97	3845.39	186.24	2604.8
8_2	NT	27.61	5107.93	186.38	3769.07
8_2	NT	20.05	4247.69	205.58	2824.67
8_2	NT	19.47	2817.3	214.56	2294.32
8_2	NT	25.14	2341.37	234.79	1713.04
8_2	NT	29.76	3213.67	276.53	2012.65
8_2	NT	18.9	3237.37	148.53	2242.73
8_2	NT	24.69	3547.85	129.12	2789.68
8_2	NT	16.43	3636.14	192.14	3166.28
8_2	NT	19.25	6301.63	152.64	6673.1
8_2	NT	17.81	2750.7	141.56	2224.91
8_2	NT	56.91	1266.66	243.09	1205.48
8_2	NT	32.91	1332.99	227.52	1248.35
8_2	NT	45.03	3965.93	245.74	2641.55
8_2	NT	16.82	5133.6	113.08	3462.98
8_2	NT	25.33	2964.9	235.29	2340.64
8_2	NT	35.09	4106.02	244.16	3325.42
8_2	NT	24.41	2366.89	230.58	2122.11
8_2	NT	28.48	3616.52	241.14	2869.36
8_2	NT	28.71	1781.66	270.4	1429.3
8_2	NT	27.68	4494	217.74	3388.21
8_2	NT	32.76	4193.28	216.6	2863.25
8_2	NT	16.94	5435.86	234.29	3072.64
8_2	NT	20.14	2140.16	247.2	1521.24
8_2	NT	18.88	7858.58	168.62	4615.4
8_2	NT	16.28	3633.38	148.21	2555.98
8_2	NT	16.59	3313.14	180.11	2682.42
8_2	NT	20.3	3537.87	199.18	2319.98
8_2	NT	21.16	3847.28	193.58	2733.18
8_2	NT	19.54	2837.92	188.25	2560.18
8_2	NT	26.2	2315.93	170.28	1623.99
8_2	NT	14.31	1463.3	161.12	1192.72
8_2	NT	14.88	6629.81	123.63	4148.52
8_2	NT	17.05	4669.27	142.63	3502.28
8_2	NT	24.62	2775.94	141.28	2373.2
8_2	NT	28.2	3126.07	284.64	2374.1
8_2	NT	22.2	2811.99	253.44	1910.8
8_2	NT	17.53	4146.04	137.92	3367.87
8_2	NT	20.84	1840.39	180.55	1305.3
8_2	NT	16.69	2814.12	185.35	2109.12
8_2	NT	20.94	4446.07	113.01	2900.91
8_2	NT	18.01	1732.49	105.26	1326.55
8_2	NT	23.64	2586.81	193.67	2043.68
8_2	NT	21.17	2869.68	174.63	2561.63
8_2	NT	30.1	3052.27	220.41	2311.89
8_2	NT	20.89	2267.86	121.23	1734.25
8_2	NT	19.91	2669.33	125.8	1950.35
8_2	NT	22.49	2127.79	228.64	1576.79
8_2	NT	27.29	3039.95	227.34	2171.3
8_2	TRC40	9.49	9282.77	68.73	8743.86
8_2	TRC40	20.34	2596.72	116.44	2701.98
8_2	TRC40	12.85	2465.45	65.4	3575.27
8_2	TRC40	17.21	5416.59	91.64	7131.37
8_2	TRC40	23.27	5320.29	117.24	7579.86
8_2	TRC40	14.58	7662.5	119.54	8266.91
8_2	TRC40	18.9	4178.07	145.6	4868.75
8_2	TRC40	11.41	3284.25	83.34	4265.96
8_2	TRC40	18.58	7367.17	95.29	8733.74
8_2	TRC40	14.7	2000.15	116.62	2111.87
8_2	TRC40	23.75	4360.73	108.66	5460.54
8_2	TRC40	7.77	2078.65	117.88	2247.55
8_2	TRC40	17.55	3619.36	127.4	3730.06
8_2	TRC40	13.23	2622.75	88.62	2367.15
8_2	TRC40	12.6	5169.58	91.45	6213.84
8_2	TRC40	9.78	4380.49	69.88	5966
8_2	TRC40	16.78	2093.37	76.52	2842.66
8_2	TRC40	15.91	4270.21	79.15	4376.92
8_2	TRC40	10.2	3643.5	103.75	4017.13
8_2	TRC40	28.14	2944.73	187.73	2705.1
8_2	TRC40	11.36	2791.4	76.89	3506.04
8_2	TRC40	17.48	4466.53	155.04	4776.76
8_2	TRC40	8.78	3020.46	98.9	3951.31
8_2	TRC40	14.58	1516.62	130.35	1698.23
8_2	TRC40	11.43	3598.38	157.24	4545.96
8_2	TRC40	14.72	1551.61	107.88	1713.99
8_2	TRC40	14.22	6723.21	175.41	7309.83
8_2	TRC40	19.54	3960.13	120.87	4312.59
8_2	TRC40	19.54	7351.49	147.84	7554.9
8_2	TRC40	10.93	5647.6	60.62	6619.7
8_2	TRC40	35.22	3266.18	116.25	4352.47
8_2	TRC40	15.93	4498.64	84.02	5163.08
8_2	TRC40	19.84	1876.23	128.82	2045.67
8_2	TRC40	16.87	6488.71	179.41	7280.56
8_2	TRC40	15.18	4198.35	132.32	4471.51
8_2	TRC40	9.9	3432.63	116.2	3636.48
8_2	TRC40	12.34	3132.02	107.66	3926.37
8_2	TRC40	18.19	4202.52	189.99	2950.5
8_2	TRC40	9.96	5019.36	181.99	3164.07
8_2	TRC40	20.66	1922.21	59.24	2446.82
8_2	TRC40	25.39	3822.19	118.38	4487.09
8_2	TRC40	3.7	2944.9	83.57	4264.43
8_2	TRC40	10.9	3952.17	143.27	3961.6
8_2	TRC40	11.5	2906.75	103.4	3123.97
8_2	TRC40	18.33	1535.8	79.13	1877.2
8_2	TRC40	12.98	1604.28	101.99	1557.61
8_2	TRC40	15.29	5478.41	177.62	5284.69
8_2	TRC40	13.78	5188.32	130.6	5948.6
8_2	TRC40	18.97	2413.5	153.07	2467.18
8_2	TRC40	8.43	3837.06	77.58	3324.7
8_2	TRC40	17.26	2326.89	134.01	3738.58
8_2	TRC40	19.2	3064.23	165.33	3473.73
8_2	TRC40	17.51	1378.51	102.2	1653.39
8_2	TRC40	15.09	7138.87	77.1	7927.88
8_2	TRC40	15.63	2760.51	113.74	3566.61
8_2	TRC40	28.62	5234.74	167.61	5978.27
8_2	TRC40	3.04	2692.06	61.87	3405.77
8_2	TRC40	36.14	9640.18	114.22	10845.2
8_2	TRC40	19.11	4753.75	136.6	4978.57
8_2	TRC40	11.47	3710.65	105.62	5050.9
8_2	TRC40	15.79	3375.52	83.18	3194.01
8_2	TRC40	18.35	5279.28	155.54	6207.05
8_2	TRC40	11.02	6157.79	111.48	7890.54
8_2	TRC40	19.32	6047.7	101.46	8236.99
8_2	TRC40	16.98	4185.04	106.2	4190.71
8_2	TRC40	16.98	4748.34	147.82	5399.67
8_2	TRC40	10.52	4210.77	155.4	5441.63
8_2	TRC40	18.29	5358.43	199.31	6502.81
8_6	NT	15.59	1971.97	87.48	1490.18
8_6	NT	20.5	3603.29	88.37	3052.61
8_6	NT	19.02	2218.83	131.86	1890.72
8_6	NT	20.8	2254.6	91.82	2463.57
8_6	NT	25.08	2417.03	86.08	2512.3
8_6	NT	39.64	3288.81	195.38	2749.49
8_6	NT	28.55	1571.94	107.32	1476.72
8_6	NT	21.67	3201.92	126.42	2763.48
8_6	NT	14.61	2126.89	102.52	2107.24
8_6	NT	26.22	2198.99	91.66	1930.88
8_6	NT	25.28	1687.35	70.86	1627.01
8_6	NT	23.75	6157.99	123.57	4640.72
8_6	NT	29.48	2468.21	124.3	1969.31
8_6	NT	20.68	3416.97	73.23	3530.68
8_6	NT	19.82	4857.45	68.48	3837.29
8_6	NT	24.59	4249.75	121.12	4208.09
8_6	NT	19.47	4934.59	104.11	4704.1
8_6	NT	26.92	2232.23	141.56	3050.21
8_6	NT	24.11	2896.2	123.18	2501.87
8_6	NT	30.61	1659.89	100.02	1247.32
8_6	NT	4.64	1778.33	121.62	2220.24
8_6	NT	11.98	2217.04	162.86	1928.43
8_6	NT	29.46	4163.29	166.95	3620.05
8_6	NT	14.95	2509.91	112.14	2138.92
8_6	NT	25.99	2575.71	132.59	2574.34
8_6	NT	20.69	3747.68	104.04	3750.58
8_6	NT	21.64	3318.01	107.34	3169.47
8_6	NT	26.01	2719.34	104.05	2684.88
8_6	NT	20.28	2264.83	116.78	2271.54
8_6	NT	21.01	1984.93	136.96	2585.64
8_6	NT	19.52	2017.05	129.23	1865.13
8_6	NT	25.28	2092.1	108.02	2173.16
8_6	NT	11.98	4176.66	76.44	4464.87
8_6	NT	30.33	2627.66	123.88	2199.49
8_6	NT	14.35	3427.79	69.23	3231.54
8_6	NT	18.92	1699.92	114.33	1442.87
8_6	NT	6.2	1609.24	60.11	1455.96
8_6	NT	11.16	3150.24	82.12	2902.1
8_6	NT	15.27	3149.71	139.57	2728.21
8_6	NT	9.26	5640.91	50.54	4066.14
8_6	NT	13.72	5590.79	146.1	2915.7
8_6	NT	23.91	3797.18	114.42	2955.66
8_6	NT	25.35	1812.78	96.09	1793.09
8_6	NT	21.33	3568.71	38.77	5254.94
8_6	NT	22.99	4308.99	115.52	4601.79
8_6	NT	35.43	3544.61	104.55	3461.72
8_6	NT	19	2448.34	103.89	2130.28
8_6	NT	10.68	3712.44	81.49	3232.43
8_6	NT	23.34	1886.72	116.82	1897.74
8_6	NT	25	2213.39	85.85	2894.5
8_6	NT	14.51	4372.54	117	4884.87
8_6	NT	9.08	3929.63	121.28	3101.39
8_6	NT	16.52	4261.03	120.6	4121.6
8_6	NT	23.5	3223.54	124.04	2927.93
8_6	NT	23.38	4456.98	127.24	4110.91
8_6	NT	24.2	2189.9	88.23	1986.54
8_6	SGTA	24.55	5328.64	98.92	4979.66
8_6	SGTA	6.22	7863.73	109.51	7189.42
8_6	SGTA	8.44	7690.03	58.47	7905.59
8_6	SGTA	15.18	4729.73	85.58	4675.4
8_6	SGTA	20.3	3596.14	122.31	3898.09
8_6	SGTA	15.77	8516.27	85.67	9699.55
8_6	SGTA	13.64	4543.41	120.16	5485.27
8_6	SGTA	19.57	6735.67	109.67	6655.8
8_6	SGTA	9.71	5264.31	75.22	6684.7
8_6	SGTA	9.9	5561.91	101.9	7473.38
8_6	SGTA	16.27	6479	140.89	7913.43
8_6	SGTA	18.45	2518.78	124.2	2333.12
8_6	SGTA	16.3	3635.69	76.11	5091.5
8_6	SGTA	9.23	6481.41	67.72	7124.47
8_6	SGTA	27.41	4844.04	57.26	5043.64
8_6	SGTA	23.2	1793.27	123.98	2026.66
8_6	SGTA	6.31	2853.78	51.77	4278.33
8_6	SGTA	20.91	5834.56	109.58	6649.47
8_6	SGTA	14.45	1911.75	58.61	2197.1
8_6	SGTA	12.69	1947.71	77.97	2172.23
8_6	SGTA	14.29	3663.11	96.69	4701.09
8_6	SGTA	29.17	3191.66	113.56	3067.39
8_6	SGTA	4.71	2002.59	93.87	2310.1
8_6	SGTA	8.21	6074.37	39.32	7106.73
8_6	SGTA	13.87	3464.48	97.08	5731.35
8_6	SGTA	18.7	5600.71	108	6444.03
8_6	SGTA	16.78	6256.02	104	6582.02
8_6	SGTA	15.73	3968.63	105.26	4360.66
8_6	SGTA	15.27	3895.78	99.98	4577.07
8_6	SGTA	28.87	9358.15	91.32	11713.2
8_6	SGTA	13.92	3012.79	80.16	3401.41
8_6	SGTA	13.44	2240.75	82.15	2203.56
8_6	SGTA	20.44	4419.89	139.36	4334.45
8_6	SGTA	18.47	5206.67	123.22	4668.08
8_6	SGTA	20.16	5131.04	108.71	4707.76
8_6	SGTA	17.23	2393.95	159.86	2213.42
8_6	SGTA	23.77	3839.22	122.17	4110.85
8_6	SGTA	29.23	2996.21	109.12	4863.33
8_6	SGTA	8.07	1339.39	56.62	2041.71
8_6	SGTA	18.08	5905.22	118.12	5667.33
8_6	SGTA	13	4735.89	97.17	4774.7
8_6	SGTA	26.88	2393.43	182.24	2155.17
8_6	SGTA	15.5	5287.85	66.84	6418.7
8_6	SGTA	12.82	7219.39	84.44	8476.28
8_6	SGTA	19.89	6060.73	102.65	7896.38
8_6	SGTA	27.54	2375.49	114.95	2213.51
8_6	SGTA	12.6	6191.28	55.66	6373.55
8_6	SGTA	18.13	3115.45	85.65	3036.75
8_6	TRC35	13.97	6334	84.25	7557.14
8_6	TRC35	18.63	4812.84	76.41	4877.45
8_6	TRC35	15.09	5050.41	90.42	4641.43
8_6	TRC35	13.65	4906.61	106.31	5385.74
8_6	TRC35	12.57	2458.78	65.69	2392.86
8_6	TRC35	17.92	2382.15	68.14	2311.7
8_6	TRC35	23.64	2780.93	124	2176.38
8_6	TRC35	18.01	5538.15	76.2	5211.52
8_6	TRC35	16.14	1933.94	149.44	1993.96
8_6	TRC35	12.78	2314.84	114.97	2298.65
8_6	TRC35	17.92	4004.94	117.92	4470.08
8_6	TRC35	12.14	5833.18	75.88	6494.16
8_6	TRC35	24.07	4373.09	110.68	4565.89
8_6	TRC35	18.58	5225.23	92.75	5448.09
8_6	TRC35	14.04	2093.7	68.76	2314.26
8_6	TRC35	5.74	5079.36	37.1	5836.96
8_6	TRC35	10.1	5810.28	88.96	6098.26
8_6	TRC35	16.84	3946.18	87.88	4500.6
8_6	TRC35	17.3	3563.66	57.23	4405.75
8_6	TRC35	12.82	5165.66	125.62	6005.18
8_6	TRC35	19.82	3389.94	154.83	4034.55
8_6	TRC35	25.32	7572.21	98.22	8487.06
8_6	TRC35	19.77	5961.23	86.38	7920.8
8_6	TRC35	5.97	2571.38	119.75	2847.99
8_6	TRC35	11.27	6828.31	78.31	9606.41
8_6	TRC35	14.51	6376.59	109.21	7189.7
8_6	TRC35	22.93	2889.64	137.33	2962.72
8_6	TRC35	16.53	3866.75	98.04	3417.82
8_6	TRC35	10.03	6473.96	75.5	5716
8_6	TRC35	11.91	6598.01	64.94	6390.36
8_6	TRC35	33.1	2451.94	93.48	2285.85
8_6	TRC35	11.13	1553.68	83.41	1507.82
8_6	TRC35	14.38	2204.76	90.49	2024.34
8_6	TRC35	11.63	3072.77	138.15	3132.58
8_6	TRC35	12.59	1794.77	116.96	2187.56
8_6	TRC35	8.92	2903.12	91.36	3763.85
8_6	TRC35	16.57	9674.76	85.58	10654.7
8_6	TRC35	5.9	5050.8	90.86	6530.77
8_6	TRC35	25.69	3923.14	103.95	4867.47
8_6	TRC35	21.3	5499.31	115.86	6612.44
8_6	TRC35	15.61	4797.82	110.77	5636.29
8_6	TRC35	8.27	8747.55	117.55	9352.99
8_6	TRC35	27.25	4421.37	78.03	5153.53
8_6	TRC35	14.2	6054.78	97.76	7373.73
8_6	TRC35	20.96	6132.86	72.37	7547.46
8_6	TRC35	19.25	3817.09	81.81	4665.64
8_6	TRC35	15.96	7695.07	62.38	8597.42
8_6	TRC35	21.81	8017.05	87.2	7687.82
8_6	TRC35	19.95	4777.82	99.86	5718.01
8_6	WRB	30.74	5195.4	96.59	6052.16
8_6	WRB	25.44	3985.54	107.89	7413.39
8_6	WRB	20.44	2753.29	157.58	2796.21
8_6	WRB	16.37	4094.43	95.15	4937.64
8_6	WRB	7.61	4000.76	130.97	4735.18
8_6	WRB	13.9	2248.94	153.01	2707.2
8_6	WRB	16.12	1395.97	188.39	1477.4
8_6	WRB	13.87	3585.24	79.08	4136.63
8_6	WRB	14.06	2590.73	50.56	3285.07
8_6	WRB	28.27	1940.7	105.05	2081.83
8_6	WRB	7.86	4332.88	109.21	6128.46
8_6	WRB	20.59	3941.54	74.68	4909.48
8_6	WRB	16.16	2298.56	102.1	2267.52
8_6	WRB	11.31	1485.93	124.71	1899.73
8_6	WRB	23.2	1776.3	65.92	2478.94
8_6	WRB	21.76	1845.17	114.52	2053.76
8_6	WRB	17.17	1511.81	73.26	1580.98
8_6	WRB	11.79	1777.83	53.88	2459.72
8_6	WRB	24.5	3020.36	91.08	2495.89
8_6	WRB	12.73	1723.56	62.7	1396.91
8_6	WRB	15.02	1759.53	54.24	2484.7
8_6	WRB	24.46	3453.93	83.36	4240.8
8_6	WRB	31.29	3064.38	95.08	2851.92
8_6	WRB	8.43	2589.59	97.16	2507.61
8_6	WRB	15.2	6174.65	89.37	7147.48
8_6	WRB	12.73	5986.23	108.68	7377.11
8_6	WRB	19.47	4979.66	145.87	5834.16
8_6	WRB	8.46	4153.76	92.92	4986.5
8_6	WRB	16.89	3386.84	109.28	4658.85
8_6	WRB	28.37	2520.9	85.85	2564.06
8_6	WRB	11.5	3290.79	65.83	3727.15
8_6	WRB	14.36	2439.96	82.81	2779.28
8_6	WRB	15.22	4971.32	140.85	6837.93
8_6	WRB	11.66	7867.86	119.48	8879.54
8_6	WRB	15.8	2010.03	100.6	2386.07
8_6	WRB	16.6	3540.39	97.53	3231.78
8_6	WRB	14.28	3396.11	115.11	3590.31
8_6	WRB	12.66	4318.78	96.05	4136.32
8_6	WRB	19.16	4088.76	96	5000.59
8_6	WRB	19.63	3175.4	99.27	2811.21
8_6	WRB	24.53	2074.76	137.44	1650.52
8_6	WRB	10.52	4732.34	72.18	4991.12
8_6	WRB	12.66	3429.49	65.17	3913.96
8_6	WRB	13.37	4019.11	80.32	4019.51
8_6	WRB	8.78	3147.08	80.76	4668.87
8_6	WRB	17.81	4154.92	79.72	4875.71
8_6	WRB	9.9	2885.24	38.7	3673.25
8_6	WRB	9.53	1676.44	132.71	1597.83
8_6	WRB	16.12	3817.6	115.22	4386.93
8_6	WRB	19.48	3047.88	109.12	2912.96
8_6	WRB	7.91	2598.12	50.26	2605.85
8_6	WRB	9.24	2986.49	135.2	3426.99
8_6	WRB	10.47	2987.31	115.91	3766.8
8_6	WRB	16.89	3210.22	74.84	3580.02
8_6	WRB	6.9	1125.78	115.61	1286.3
8_6	WRB	10.33	2977.48	113.39	2514.19
8_6	WRB	11.63	1607.41	102.13	1642.46
8_6	WRB	24.43	3362.06	122.72	3149.3
8_6	WRB	18.31	4093.77	93.16	3812.22
8_6	WRB	10.44	3917.6	122.1	4560.46
8_6	WRB	13.46	2428.72	76.41	2922.03
