# Supplementary material for: An engineered transcriptional reporter of protein localization identifies regulators of mitochondrial and ER membrane protein trafficking in high-throughput CRISPRi screens
Source: eLife. 2021 Aug 20;10:e69142. doi: 10.7554/eLife.69142 (PMC8423448; doi:10.7554/eLife.69142)
Supplement: Figure 3—figure supplement 1—source data 2. [file elife-69142-fig3-figsupp1-data2.xlsx]

## Sheet: Fig 3 - S2
Experiment	sgRNA	Golgi_Area	G_mTA-Intensity	Mito_Area	M_mTA-Intensity
8_2	NT	25.39	2468.66	150.33	1991.44
8_2	NT	19.16	1894.94	104.43	1792.21
8_2	NT	19.59	2114.51	110.19	2191.11
8_2	NT	20.25	2587.58	100.39	2520.7
8_2	NT	16.12	3448.27	135.91	3255.11
8_2	NT	14.13	2336.56	133.05	2166.91
8_2	NT	17.8	1597.13	181.67	1117.6
8_2	NT	31.47	3938.99	106.26	4373.36
8_2	NT	22.81	4229.92	99.22	3433.2
8_2	NT	18.38	3677.9	105.03	2875.09
8_2	NT	14.61	3860.61	149.55	2817.68
8_2	NT	28.2	5098.36	163.24	3957.19
8_2	NT	17.37	4319.63	121.64	3327.85
8_2	NT	16.84	2829.44	135.27	2590.42
8_2	NT	21.8	2342.5	164.48	1901.57
8_2	NT	25.96	3279.33	142.77	2385.79
8_2	NT	17.9	3255.11	79.73	2640.66
8_2	NT	19.79	3682.17	105.17	3037.96
8_2	NT	13.65	3643.57	111.52	3800.05
8_2	NT	9.19	6151.86	98.6	8113.02
8_2	NT	17.32	2747.42	117.16	2356.51
8_2	NT	64.55	1252.07	144.09	1314.72
8_2	NT	31.29	1334.76	137.44	1387.1
8_2	NT	38.68	4082.49	229.83	2738.43
8_2	NT	14.88	5183.02	97.56	3706.96
8_2	NT	21.58	2956.38	155.63	2698.35
8_2	NT	27.66	4157.79	173	3799.53
8_2	NT	15.82	2363.77	140.96	2406.78
8_2	NT	18.67	3768.97	193.87	3161.34
8_2	NT	25.78	1781.69	155.56	1611.58
8_2	NT	29.48	4484.29	130.44	4012.02
8_2	NT	30.06	4255.07	202.15	2947.05
8_2	NT	16.16	5462.59	159.52	3444.65
8_2	NT	18.31	2150.58	102.88	1747.56
8_2	NT	16.18	7935.92	119.66	5219.91
8_2	NT	13.65	3709.98	114.29	2779.87
8_2	NT	19.38	3307.1	142.84	2873.66
8_2	NT	21.94	3497.66	96.43	2701.55
8_2	NT	19	3898.14	130.12	3050.7
8_2	NT	11.45	2905.23	186.17	2610.18
8_2	NT	22.79	2348.33	132.37	1741.13
8_2	NT	12.71	1471.1	122.7	1265.61
8_2	NT	14.19	6662.3	95.11	4584.99
8_2	NT	18.81	4680.87	109.32	3852.32
8_2	NT	23.16	2784.05	101.44	2623.38
8_2	NT	28.27	3124.53	164.68	2712.39
8_2	NT	24.89	2785.16	154.97	2123.92
8_2	NT	17.74	4142.32	125.49	3487.63
8_2	NT	25.28	1788.76	115.27	1398.79
8_2	NT	16.39	2821.29	131.27	2332.47
8_2	NT	20.68	4450.83	125.28	2794.44
8_2	NT	12.89	1758.74	87.34	1399.73
8_2	NT	23.59	2586.6	138.99	2177.84
8_2	NT	26.79	2827.35	129.96	2810.51
8_2	NT	36.75	2991.17	186.97	2403.41
8_2	NT	16.18	2321.43	95.66	1895.97
8_2	NT	19.91	2669.33	105.87	2066.28
8_2	NT	23.06	2121.54	178.28	1671.63
8_2	NT	28.44	3027.59	160.21	2343.19
8_2	ATP6V1A	9.69	7085.58	71.18	5291.2
8_2	ATP6V1A	10.84	8498.53	91.75	6360.73
8_2	ATP6V1A	9.83	7012.13	154.88	4871.41
8_2	ATP6V1A	6.81	9657.75	132.07	4933.69
8_2	ATP6V1A	19.29	8410.24	163.84	3957.69
8_2	ATP6V1A	18.24	5696.19	131.7	3794.51
8_2	ATP6V1A	31.2	9696.82	106.38	6107.34
8_2	ATP6V1A	9.65	9420.54	83.98	6835.51
8_2	ATP6V1A	29.26	7862.92	64.36	3483.03
8_2	ATP6V1A	15.54	14131.1	75.48	5049.38
8_2	ATP6V1A	14.12	2740.94	113.05	1792.59
8_2	ATP6V1A	4.28	4875.93	96.12	2889.97
8_2	ATP6V1A	15.57	7763.97	127.91	4751.04
8_2	ATP6V1A	12.91	16824.7	61.24	13102.5
8_2	ATP6V1A	15.18	22177.2	61.94	14113.4
8_2	ATP6V1A	9.55	7890.98	69.85	4816.24
8_2	ATP6V1A	10.58	18391.5	76.34	11442.7
8_2	ATP6V1A	18.28	12020.8	156.92	8128.52
8_2	ATP6V1A	10.97	9639.77	95.18	6811.22
8_2	ATP6V1A	11.96	11901.4	123.79	5871.91
8_2	ATP6V1A	19.08	11976.4	185.4	6659.9
8_2	ATP6V1A	3.16	3123.78	108.04	2745.66
8_2	ATP6V1A	16.48	3935.25	122.08	2436.62
8_2	ATP6V1A	16.62	4845.3	97.76	3340.33
8_2	ATP6V1A	21.53	11881.2	157.99	5504.81
8_2	ATP6V1A	17.64	7696.99	116.68	4899.31
8_2	ATP6V1A	37.4	6186.93	251.63	3936.59
8_2	ATP6V1A	39.84	5231.07	182.99	3022.66
8_2	ATP6V1A	10.31	9376.77	66.28	3746.38
8_2	ATP6V1A	11.47	7723.92	120.64	5099.73
8_2	ATP6V1A	10.83	6988.02	97.58	4807.99
8_2	ATP6V1A	24.82	7631.88	115.45	4374.35
8_2	ATP6V1A	8.78	16779.4	83.54	10228.3
8_2	ATP6V1A	13.53	9589.4	113.56	4648.27
8_2	ATP6V1A	12.3	5571.78	138.31	2599.1
8_2	ATP6V1A	16.8	11345.7	106.4	6647.96
8_2	ATP6V1A	31.15	5897.57	158.52	4226.63
8_2	ATP6V1A	25.8	5410.41	138.79	3334.97
8_2	ATP6V1A	7.77	7398.36	78.76	5468.82
8_2	ATP6V1A	44.2	15852.1	223.29	7892.9
8_2	ATP6V1A	15.2	5098.4	84.68	3719.4
8_2	ATP6V1A	8.98	2844.49	65.17	2005.58
8_2	ATP6V1A	11.38	2081.98	87.5	1869.2
8_2	ATP6V1A	5.99	5894.28	88.18	4030.39
8_2	ATP6V1A	25.62	2863.71	116.62	1947.81
8_2	ATP6V1A	10.4	6470.84	70.86	4786.35
8_2	ATP6V1A	16.96	9474.64	165.55	5600.65
8_2	ATP6V1A	8	13101.1	101.28	8076.76
8_6	NT	1971.97	1490.18	1.32331	1.19906
8_6	NT	3603.29	3052.61	1.1804	1.07852
8_6	NT	2218.83	1890.72	1.17354	1.07273
8_6	NT	2254.6	2463.57	0.915176	0.854823
8_6	NT	2417.03	2512.3	0.962079	0.894382
8_6	NT	3288.81	2749.49	1.19615	1.09181
8_6	NT	1571.94	1476.72	1.06448	0.980752
8_6	NT	3201.92	2763.48	1.15866	1.06018
8_6	NT	2126.89	2107.24	1.00932	0.934231
8_6	NT	2198.99	1930.88	1.13885	1.04348
8_6	NT	1687.35	1627.01	1.03709	0.957646
8_6	NT	6157.99	4640.72	1.32695	1.20212
8_6	NT	2468.21	1969.31	1.25334	1.14004
8_6	NT	3416.97	3530.68	0.967794	0.899202
8_6	NT	4857.45	3837.29	1.26585	1.1506
8_6	NT	4249.75	4208.09	1.0099	0.934716
8_6	NT	4934.59	4704.1	1.049	0.967693
8_6	NT	2232.23	3050.21	0.731828	0.700181
8_6	NT	2896.2	2501.87	1.15761	1.0593
8_6	NT	1659.89	1247.32	1.33077	1.20534
8_6	NT	1778.33	2220.24	0.800963	0.758492
8_6	NT	2217.04	1928.43	1.14966	1.0526
8_6	NT	4163.29	3620.05	1.15006	1.05294
8_6	NT	2509.91	2138.92	1.17345	1.07266
8_6	NT	2575.71	2574.34	1.00053	0.926815
8_6	NT	3747.68	3750.58	0.999227	0.925714
8_6	NT	3318.01	3169.47	1.04687	0.965895
8_6	NT	2719.34	2684.88	1.01283	0.937192
8_6	NT	2264.83	2271.54	0.997046	0.923875
8_6	NT	1984.93	2585.64	0.767675	0.730415
8_6	NT	2017.05	1865.13	1.08145	0.995066
8_6	NT	2092.1	2173.16	0.962699	0.894906
8_6	NT	4176.66	4464.87	0.935449	0.871922
8_6	NT	2627.66	2199.49	1.19467	1.09056
8_6	NT	3427.79	3231.54	1.06073	0.977588
8_6	NT	1699.92	1442.87	1.17815	1.07663
8_6	NT	1609.24	1455.96	1.10528	1.01516
8_6	NT	3150.24	2902.1	1.0855	0.998483
8_6	NT	3149.71	2728.21	1.1545	1.05667
8_6	NT	5640.91	4066.14	1.38729	1.25302
8_6	NT	5590.79	2915.7	1.91748	1.7002
8_6	NT	3797.18	2955.66	1.28471	1.1665
8_6	NT	1812.78	1793.09	1.01098	0.935628
8_6	NT	3568.71	5254.94	0.679115	0.655721
8_6	NT	4308.99	4601.79	0.936373	0.872701
8_6	NT	3544.61	3461.72	1.02394	0.946562
8_6	NT	2448.34	2130.28	1.1493	1.05229
8_6	NT	3712.44	3232.43	1.1485	1.05161
8_6	NT	1886.72	1897.74	0.994193	0.921468
8_6	NT	2213.39	2894.5	0.764688	0.727896
8_6	NT	4372.54	4884.87	0.895119	0.837906
8_6	NT	3929.63	3101.39	1.26705	1.15161
8_6	NT	4261.03	4121.6	1.03383	0.954899
8_6	NT	3223.54	2927.93	1.10096	1.01152
8_6	NT	4456.98	4110.91	1.08418	0.997369
8_6	NT	2189.9	1986.54	1.10237	1.01271
8_6	CCNK #1	3797.57	3043.36	1.24782	1.13539
8_6	CCNK #1	3539.65	2382.54	1.48566	1.33599
8_6	CCNK #1	3583.06	3080.06	1.16331	1.06411
8_6	CCNK #1	2747.49	3088.16	0.889685	0.833323
8_6	CCNK #1	3735.5	3262.22	1.14508	1.04873
8_6	CCNK #1	2015.43	1570.42	1.28337	1.16537
8_6	CCNK #1	2862.29	2055.41	1.39256	1.25747
8_6	CCNK #1	1652.25	1460.34	1.13141	1.03721
8_6	CCNK #1	2472.91	2497.43	0.990182	0.918085
8_6	CCNK #1	1449.64	1686.36	0.859627	0.807971
8_6	CCNK #1	4385.27	3582.97	1.22392	1.11523
8_6	CCNK #1	4021.72	3551.51	1.1324	1.03803
8_6	CCNK #1	3695	3096.78	1.19317	1.0893
8_6	CCNK #1	4982.22	3616.45	1.37765	1.24489
8_6	CCNK #1	3710.45	3683.73	1.00725	0.932484
8_6	CCNK #1	2492.54	2054.44	1.21325	1.10622
8_6	CCNK #1	2147.66	2102.16	1.02164	0.944622
8_6	CCNK #1	2474.49	2271.37	1.08943	1.00179
8_6	CCNK #1	2209.58	1990.03	1.11032	1.01942
8_6	CCNK #1	3714.49	2824.66	1.31502	1.19207
8_6	CCNK #1	3073.83	3033.58	1.01327	0.937557
8_6	CCNK #1	2753.88	2569.43	1.07179	0.986913
8_6	CCNK #1	2598.04	2230.26	1.1649	1.06545
8_6	CCNK #1	2854.6	2773.29	1.02932	0.951095
8_6	CCNK #1	3005.4	2277.56	1.31957	1.1959
8_6	CCNK #1	2606.97	2352.63	1.10811	1.01755
8_6	CCNK #1	2283.62	2470.38	0.9244	0.862603
8_6	CCNK #1	3752.12	3650.27	1.0279	0.9499
8_6	CCNK #1	3243.62	2885.15	1.12425	1.03116
8_6	CCNK #1	3294.5	2863.39	1.15056	1.05335
8_6	CCNK #1	2403.66	2015.88	1.19236	1.08861
8_6	CCNK #1	1746.69	2010.31	0.868866	0.815763
8_6	CCNK #1	2720.81	2281.75	1.19242	1.08866
8_6	CCNK #1	1876.39	1779.61	1.05438	0.972234
8_6	CCNK #1	3211.91	3302.42	0.972593	0.90325
8_6	CCNK #1	3262.74	3122.32	1.04497	0.964298
8_6	CCNK #1	1958.65	2178.8	0.898958	0.841144
8_6	CCNK #1	4773.61	3552.48	1.34374	1.21629
8_6	CCNK #1	2331.94	2336.06	0.998236	0.924879
8_6	CCNK #1	3998.34	3261.83	1.2258	1.11681
8_6	CCNK #1	2793.99	2758.4	1.0129	0.937249
8_6	CCNK #1	2079.63	1691.43	1.22951	1.11994
8_6	CCNK #1	2677.37	2203.35	1.21514	1.10782
8_6	CCNK #1	1487.65	1358.66	1.09494	1.00644
8_6	CCNK #1	2674.26	2512.03	1.06458	0.980836
8_6	CCNK #1	2481.69	2447.12	1.01413	0.938281
8_6	CCNK #2	2401.5	1702.49	1.41058	1.27266
8_6	CCNK #2	1515.15	1326.33	1.14236	1.04644
8_6	CCNK #2	2668.78	2123.76	1.25663	1.14282
8_6	CCNK #2	3641.63	3333.89	1.09231	1.00422
8_6	CCNK #2	2969.14	2205.32	1.34635	1.21849
8_6	CCNK #2	3467.49	2592.35	1.33759	1.2111
8_6	CCNK #2	3006.88	2451.02	1.22679	1.11765
8_6	CCNK #2	3238.64	2892.16	1.1198	1.02741
8_6	CCNK #2	3703.5	3900.59	0.949472	0.883749
8_6	CCNK #2	2636.1	2000.56	1.31768	1.19431
8_6	CCNK #2	4620.7	3181.9	1.45218	1.30775
8_6	CCNK #2	2958.26	2540.57	1.16441	1.06503
8_6	CCNK #2	3041.61	2698.4	1.12719	1.03364
8_6	CCNK #2	1301.95	1113.08	1.16968	1.06948
8_6	CCNK #2	1646.72	1296.35	1.27027	1.15432
8_6	CCNK #2	2677.16	2212.6	1.20996	1.10345
8_6	CCNK #2	5330.97	3697.58	1.44175	1.29895
8_6	CCNK #2	3694.54	3070.38	1.20328	1.09782
8_6	CCNK #2	2993.11	3709.52	0.806873	0.763476
8_6	CCNK #2	4011.05	3439.16	1.16629	1.06662
8_6	CCNK #2	3514.97	3513.98	1.00028	0.926604
8_6	CCNK #2	2692.27	2430.71	1.10761	1.01713
8_6	CCNK #2	3389	3413.29	0.992884	0.920364
8_6	CCNK #2	3359.53	2851.22	1.17828	1.07673
8_6	CCNK #2	4697.81	3144.14	1.49415	1.34315
8_6	CCNK #2	2565.08	2493.96	1.02852	0.950418
8_6	CCNK #2	3074	3155.52	0.974166	0.904577
8_6	CCNK #2	1457.47	1412.08	1.03214	0.953478
8_6	CCNK #2	2387.76	1892.3	1.26183	1.1472
8_6	CCNK #2	3063.13	2731.92	1.12124	1.02862
8_6	CCNK #2	3619.77	3253.89	1.11244	1.02121
8_6	CCNK #2	4454.65	3878.61	1.14852	1.05163
8_6	CCNK #2	4119.24	3491.71	1.17972	1.07795
8_6	CCNK #2	3997.34	3126.96	1.27835	1.16113
8_6	CCNK #2	3044.59	2672.84	1.13908	1.04367
8_6	CCNK #2	4743.7	3668.21	1.29319	1.17365
8_6	CCNK #2	4675.53	3140.38	1.48884	1.33867
8_6	CCNK #2	2150.63	1488.54	1.44479	1.30152
8_6	CCNK #2	3257.23	2743.85	1.1871	1.08417
8_6	CCNK #2	5366.1	5414.18	0.99112	0.918876
8_6	CCNK #2	4047.38	3628.22	1.11553	1.02381
8_6	CCNK #2	4195.64	3519.15	1.19223	1.0885
8_6	CCNK #2	3476.19	3275.27	1.06134	0.978106
8_6	CCNK #2	3002.46	2816.29	1.0661	0.982121
8_6	CCNK #2	3652.44	2886.16	1.2655	1.1503
8_6	CCNK #2	4345.3	3618.33	1.20091	1.09582
8_6	CCNK #2	2931.31	2624.24	1.11701	1.02506
8_6	CCNK #2	1942.18	1914.11	1.01466	0.938735
8_6	CCNK #2	2124.35	1892.59	1.12246	1.02965
8_6	CCNK #2	4043.41	3464.94	1.16695	1.06718
8_6	CCNK #2	2728.65	1856.6	1.4697	1.32253
8_6	CCNK #2	3078.2	1890.43	1.62831	1.4563
8_6	CCNK #2	2449.62	1972.62	1.24181	1.13032
8_6	CCNK #2	2206.96	1407.39	1.56812	1.40554
8_6	CCNK #2	2739.2	2398.8	1.1419	1.04605
8_6	CCNK #2	2364.44	1870.5	1.26407	1.14909
8_6	CCNK #2	2203.82	1971.62	1.11777	1.0257
8_6	CCNK #2	3750.78	3138.53	1.19508	1.0909
8_6	CCNK #2	4678.95	3332.21	1.40416	1.26725
8_6	CCNK #2	5350.83	3288.46	1.62715	1.45533
8_6	CCNK #2	1455.98	1636.19	0.88986	0.83347
8_6	CCNK #2	3447.12	2757.51	1.25008	1.1373
8_6	CCNK #2	1859.45	1683.46	1.10454	1.01454
8_6	CCNK #2	2019.89	1919.62	1.05223	0.970422
8_6	SKA1 #1	1693.17	1850.61	0.914925	0.854611
8_6	SKA1 #1	3442.37	3223.88	1.06777	0.983528
8_6	SKA1 #1	4128.7	3401.39	1.21383	1.10672
8_6	SKA1 #1	3858.34	3170.16	1.21708	1.10946
8_6	SKA1 #1	3182.14	2864.08	1.11105	1.02003
8_6	SKA1 #1	3772.67	3349.63	1.12629	1.03289
8_6	SKA1 #1	2379.62	1787.47	1.33128	1.20578
8_6	SKA1 #1	2386.97	2181.09	1.09439	1.00598
8_6	SKA1 #1	3431.08	2930.77	1.17071	1.07035
8_6	SKA1 #1	2689	2735.28	0.98308	0.912096
8_6	SKA1 #1	2471.58	2124.96	1.16312	1.06395
8_6	SKA1 #1	4091.53	2976.98	1.37439	1.24214
8_6	SKA1 #1	6061.21	3844.25	1.5767	1.41277
8_6	SKA1 #1	4660.18	2988.38	1.55943	1.39821
8_6	SKA1 #1	2862.49	1711.92	1.67209	1.49323
8_6	SKA1 #1	3498.22	3210.98	1.08946	1.00182
8_6	SKA1 #1	3190.85	1998.8	1.59638	1.42938
8_6	SKA1 #1	1801.99	1564.84	1.15155	1.05419
8_6	SKA1 #1	3633.72	2168.08	1.67601	1.49653
8_6	SKA1 #1	4762.22	2528.74	1.88324	1.67132
8_6	SKA1 #1	5655.71	3685.15	1.53473	1.37738
8_6	SKA1 #1	4762.01	3203.59	1.48646	1.33666
8_6	SKA1 #1	1884.26	1357.9	1.38763	1.2533
8_6	SKA1 #1	3899.5	2469.86	1.57883	1.41458
8_6	SKA1 #1	3349.16	2940.38	1.13902	1.04362
8_6	SKA1 #1	3747.43	3056.96	1.22587	1.11687
8_6	SKA1 #1	3194.14	1923.81	1.66032	1.4833
8_6	SKA1 #1	2642.19	1881.98	1.40394	1.26706
8_6	SKA1 #1	2654.79	1908.48	1.39105	1.25619
8_6	SKA1 #1	3849.78	3272.3	1.17648	1.07521
8_6	SKA1 #1	3146.77	3202.58	0.982573	0.911668
8_6	SKA1 #1	2277.56	1673.67	1.36082	1.23069
8_6	SKA1 #1	5068.96	3348.82	1.51366	1.3596
8_6	SKA1 #1	4884.45	3525.21	1.38558	1.25158
8_6	SKA1 #1	1664.94	1560.41	1.06699	0.982867
8_6	SKA1 #1	3107.49	2291.43	1.35614	1.22674
8_6	SKA1 #1	2783.81	1785.55	1.55908	1.39791
8_6	SKA1 #1	2318.44	1729.32	1.34067	1.2137
8_6	SKA1 #1	2662.45	2174.89	1.22418	1.11544
8_6	SKA1 #1	4292.55	3689.92	1.16332	1.06411
8_6	SKA1 #1	2398.93	1666.87	1.43918	1.29679
8_6	SKA1 #1	1824.77	1250.68	1.45902	1.31352
8_6	SKA1 #1	3211.99	2075.74	1.5474	1.38806
8_6	SKA1 #1	5509.57	3158.56	1.74433	1.55416
8_6	SKA1 #2	1428.82	1270.19	1.12489	1.0317
8_6	SKA1 #2	1676.22	1471.62	1.13903	1.04363
8_6	SKA1 #2	1963.76	1701.85	1.1539	1.05617
8_6	SKA1 #2	2856.36	2254.27	1.26709	1.15164
8_6	SKA1 #2	3642.49	2685.11	1.35655	1.22709
8_6	SKA1 #2	3950.69	2682.72	1.47264	1.32501
8_6	SKA1 #2	2623.86	2029.65	1.29276	1.17329
8_6	SKA1 #2	1713.98	1855.42	0.923769	0.862071
8_6	SKA1 #2	5423.28	3740.8	1.44976	1.30571
8_6	SKA1 #2	3519.82	3520.35	0.999849	0.926239
8_6	SKA1 #2	2233.03	1925.69	1.1596	1.06098
8_6	SKA1 #2	2539.01	1916.06	1.32512	1.20058
8_6	SKA1 #2	4050.78	3594.08	1.12707	1.03354
8_6	SKA1 #2	4162.76	3542.76	1.175	1.07397
8_6	SKA1 #2	2927.83	2369.24	1.23577	1.12522
8_6	SKA1 #2	3553.98	3012.66	1.17968	1.07792
8_6	SKA1 #2	3257.66	2213.83	1.4715	1.32405
8_6	SKA1 #2	3572.94	3095.07	1.1544	1.05659
8_6	SKA1 #2	1650.45	1072.85	1.53838	1.38045
8_6	SKA1 #2	1571.31	1188.86	1.32169	1.19769
8_6	SKA1 #2	4611.29	3850.55	1.19757	1.093
8_6	SKA1 #2	3707.17	3490.78	1.06199	0.97865
8_6	SKA1 #2	2981.03	2238.31	1.33182	1.20624
8_6	SKA1 #2	4422.24	2977.5	1.48522	1.33562
8_6	SKA1 #2	1800.16	1622.45	1.10953	1.01875
8_6	SKA1 #2	2909.63	2213.6	1.31443	1.19157
8_6	SKA1 #2	1858.15	1322.18	1.40537	1.26827
8_6	SKA1 #2	3869.82	3134.65	1.23453	1.12418
8_6	SKA1 #2	3881.99	2746.68	1.41334	1.27499
8_6	SKA1 #2	4266.87	3040.7	1.40325	1.26648
8_6	SKA1 #2	2345.78	1452.85	1.61461	1.44475
8_6	SKA1 #2	1674.92	1242.8	1.3477	1.21963
8_6	SKA1 #2	3419.85	2478.7	1.3797	1.24661
8_6	SKA1 #2	3549.33	2658.46	1.33511	1.20901
8_6	SKA1 #2	4125.21	2759.18	1.49509	1.34394
8_6	SKA1 #2	1518.82	1262.91	1.20264	1.09728
8_6	SKA1 #2	1811.84	1463.27	1.23821	1.12728
8_6	SKA1 #2	2665.46	2283.87	1.16708	1.06729
8_6	SKA1 #2	1525.95	1090.45	1.39938	1.26321
8_6	SKA1 #2	1881.84	1483.28	1.2687	1.153
8_6	SKA1 #2	3579.18	2518.05	1.42141	1.2818
8_6	SKA1 #2	3506.27	2640.59	1.32784	1.20287
8_6	SKA1 #2	3818.25	2906.74	1.31358	1.19085
8_6	SKA1 #2	1401.18	1214.25	1.15395	1.05621
8_6	SKA1 #2	2311.74	1566.48	1.47575	1.32763
8_6	SKA1 #2	1236.12	1286.61	0.960757	0.893268
8_6	SKA1 #2	2009.52	1685.26	1.19241	1.08865
8_6	SKA1 #2	2435.88	1799.39	1.35373	1.22471
8_6	SKA1 #2	2907	2255.86	1.28864	1.16982
8_6	SKA1 #2	1939.98	1478.91	1.31176	1.18932
