# Supplementary material for: An engineered transcriptional reporter of protein localization identifies regulators of mitochondrial and ER membrane protein trafficking in high-throughput CRISPRi screens
Source: eLife. 2021 Aug 20;10:e69142. doi: 10.7554/eLife.69142 (PMC8423448; doi:10.7554/eLife.69142)
Supplement: Figure 4—figure supplement 1—source data 1. [file elife-69142-fig4-figsupp1-data1.xlsx]

## Sheet: Fig 4 - S1E
Experiment	sgRNA	Golgi_Area	G_mTA-Intensity	Mito_Area	M_mTA-Intensity
8_2	NT	25.39	2468.66	150.33	1991.44
8_2	NT	19.16	1894.94	104.43	1792.21
8_2	NT	19.59	2114.51	110.19	2191.11
8_2	NT	20.25	2587.58	100.39	2520.7
8_2	NT	16.12	3448.27	135.91	3255.11
8_2	NT	14.13	2336.56	133.05	2166.91
8_2	NT	17.8	1597.13	181.67	1117.6
8_2	NT	31.47	3938.99	106.26	4373.36
8_2	NT	22.81	4229.92	99.22	3433.2
8_2	NT	18.38	3677.9	105.03	2875.09
8_2	NT	14.61	3860.61	149.55	2817.68
8_2	NT	28.2	5098.36	163.24	3957.19
8_2	NT	17.37	4319.63	121.64	3327.85
8_2	NT	16.84	2829.44	135.27	2590.42
8_2	NT	21.8	2342.5	164.48	1901.57
8_2	NT	25.96	3279.33	142.77	2385.79
8_2	NT	17.9	3255.11	79.73	2640.66
8_2	NT	19.79	3682.17	105.17	3037.96
8_2	NT	13.65	3643.57	111.52	3800.05
8_2	NT	9.19	6151.86	98.6	8113.02
8_2	NT	17.32	2747.42	117.16	2356.51
8_2	NT	64.55	1252.07	144.09	1314.72
8_2	NT	31.29	1334.76	137.44	1387.1
8_2	NT	38.68	4082.49	229.83	2738.43
8_2	NT	14.88	5183.02	97.56	3706.96
8_2	NT	21.58	2956.38	155.63	2698.35
8_2	NT	27.66	4157.79	173	3799.53
8_2	NT	15.82	2363.77	140.96	2406.78
8_2	NT	18.67	3768.97	193.87	3161.34
8_2	NT	25.78	1781.69	155.56	1611.58
8_2	NT	29.48	4484.29	130.44	4012.02
8_2	NT	30.06	4255.07	202.15	2947.05
8_2	NT	16.16	5462.59	159.52	3444.65
8_2	NT	18.31	2150.58	102.88	1747.56
8_2	NT	16.18	7935.92	119.66	5219.91
8_2	NT	13.65	3709.98	114.29	2779.87
8_2	NT	19.38	3307.1	142.84	2873.66
8_2	NT	21.94	3497.66	96.43	2701.55
8_2	NT	19	3898.14	130.12	3050.7
8_2	NT	11.45	2905.23	186.17	2610.18
8_2	NT	22.79	2348.33	132.37	1741.13
8_2	NT	12.71	1471.1	122.7	1265.61
8_2	NT	14.19	6662.3	95.11	4584.99
8_2	NT	18.81	4680.87	109.32	3852.32
8_2	NT	23.16	2784.05	101.44	2623.38
8_2	NT	28.27	3124.53	164.68	2712.39
8_2	NT	24.89	2785.16	154.97	2123.92
8_2	NT	17.74	4142.32	125.49	3487.63
8_2	NT	25.28	1788.76	115.27	1398.79
8_2	NT	16.39	2821.29	131.27	2332.47
8_2	NT	20.68	4450.83	125.28	2794.44
8_2	NT	12.89	1758.74	87.34	1399.73
8_2	NT	23.59	2586.6	138.99	2177.84
8_2	NT	26.79	2827.35	129.96	2810.51
8_2	NT	36.75	2991.17	186.97	2403.41
8_2	NT	16.18	2321.43	95.66	1895.97
8_2	NT	19.91	2669.33	105.87	2066.28
8_2	NT	23.06	2121.54	178.28	1671.63
8_2	NT	28.44	3027.59	160.21	2343.19
8_2	SAE1 #1	16.52	3395	139.18	2326.38
8_2	SAE1 #1	11.96	4412.01	97.32	2592.99
8_2	SAE1 #1	15.09	3945.09	84.48	3273.22
8_2	SAE1 #1	11.57	4238.69	70.56	3388.99
8_2	SAE1 #1	10.36	2988.11	80.96	2263.47
8_2	SAE1 #1	7.75	4665.35	90.93	3285.9
8_2	SAE1 #1	14.47	4188.64	129.32	2601.34
8_2	SAE1 #1	17.01	2860.56	67.8	2969.04
8_2	SAE1 #1	18.77	3385.49	114.31	2648.16
8_2	SAE1 #1	13.14	3319.3	101.19	2608.23
8_2	SAE1 #1	17.33	3146.01	72.37	2382.52
8_2	SAE1 #1	6.77	4535.46	113.01	3418.22
8_2	SAE1 #1	23.59	3766.32	176.18	2506.8
8_2	SAE1 #1	23.66	3714.25	173.03	2908.57
8_2	SAE1 #1	19.88	3637.52	133.42	3219.58
8_2	SAE1 #1	15.29	1974.57	134.67	1341.8
8_2	SAE1 #1	10.83	4181.29	81.48	3761.14
8_2	SAE1 #1	20.71	3263.68	94.42	2533.19
8_2	SAE1 #1	4.57	2880.07	109.42	2296.61
8_2	SAE1 #1	21.85	2783.86	172.78	2040.39
8_2	SAE1 #1	9.08	2822.49	99.95	2113.62
8_2	SAE1 #1	15.48	3687.05	122.67	2746.68
8_2	SAE1 #1	19.84	2698.55	120.76	2320.14
8_2	SAE1 #1	16.57	4348.91	111.45	3057
8_2	SAE1 #1	11.34	2975.93	93.65	2936.86
8_2	SAE1 #1	10.7	4483.84	95.43	2953.23
8_2	SAE1 #1	13.23	3068.11	64.36	2602.66
8_2	SAE1 #1	11.06	4642.65	63.48	3816.25
8_2	SAE1 #1	8.02	5023.95	92.68	3977.06
8_2	SAE1 #1	7.61	3952.53	80.21	3954.41
8_2	SAE1 #1	6.08	3200.92	51.48	2354.13
8_2	SAE1 #1	11.48	3093.29	60.73	2203.27
8_2	SAE1 #1	15.61	2764.23	55.64	2232.26
8_2	SAE1 #1	8.48	4225.31	64.25	2677.31
8_2	SAE1 #1	12.09	3936.71	72.84	2733.73
8_2	SAE1 #1	8.52	3856.71	59.61	2558.43
8_2	SAE1 #1	15.32	2605.94	82.15	2138.6
8_2	SAE1 #1	6.88	3488	58.7	2423.13
8_2	SAE1 #1	11.15	3967.7	96.96	3599.2
8_2	SAE1 #1	7.82	1954.36	56.8	2284.28
8_2	SAE1 #1	14.84	4945.81	95.48	3256.58
8_2	SAE1 #1	13.71	1849.48	80.3	1407.23
8_2	SAE1 #1	11.68	2578.19	62.28	2892.1
8_2	SAE1 #1	12.3	3242.43	53.78	2911.89
8_2	SAE1 #1	7.77	4234.82	52.68	3097.01
8_2	SAE1 #1	9.9	3720.5	83.52	2665.19
8_2	SAE1 #1	10.1	2750.19	64.53	2305.33
8_2	SAE1 #1	4.41	3808.51	108.11	3942
8_2	SAE1 #1	7.34	3015.54	98.51	2311.5
8_2	SAE1 #1	13.08	4376.87	78.36	3116.12
8_2	SAE1 #1	16.84	2085.47	84	1700.77
8_2	SAE1 #1	15.29	1916.34	107.77	1621.6
8_2	SAE1 #1	7.77	4464.49	53.97	3677.34
8_2	SAE1 #1	8.91	3254.09	161.8	2112.88
8_2	SAE1 #1	10.63	5109.12	87.04	3426.37
8_2	SAE1 #1	18.95	3449.67	85.71	2563.06
8_2	SAE1 #1	11.13	4086.28	70.9	3695.25
8_2	SAE1 #1	12.53	2679.14	58.81	3092.46
8_2	SAE1 #1	12.39	4054.77	113.33	2321.79
8_2	SAE1 #1	9.46	2442.92	44.48	1943.18
8_2	SAE1 #1	5.4	4674.71	42.86	3371.29
8_2	SAE1 #1	7.52	3179.6	73.65	2267
8_2	SAE1 #1	6.6	3529.52	92.66	2713.58
8_2	SAE1 #1	10.42	1648.67	43	1706.78
8_2	SAE1 #1	8.8	1509.15	53.8	1643.48
8_2	SAE1 #1	12.16	2274.21	91.88	2366.22
8_2	SAE1 #1	12.82	5314.06	96.02	3736.54
8_2	SAE1 #1	10.51	3791.67	99.54	2598.17
8_2	SAE1 #1	10.36	3767.39	130.92	2991.97
8_2	SAE1 #1	13.53	3701.64	124.07	2597.17
8_2	SAE1 #1	11.54	3878.06	122.74	2497.32
8_2	SAE1 #1	13.64	3414.53	164.41	2765.27
8_2	SAE1 #2	22.83	4544.91	126.13	3653.63
8_2	SAE1 #2	32.11	5398.77	326.6	2776.1
8_2	SAE1 #2	55.5	4315.68	274.29	3234.23
8_2	SAE1 #2	12.73	6402.47	109.51	4421.13
8_2	SAE1 #2	9.87	1987.91	85.26	1924.79
8_2	SAE1 #2	15.95	3971.13	93.97	3014.14
8_2	SAE1 #2	9.23	2901.49	168.09	2257.52
8_2	SAE1 #2	31.2	4079.83	269.37	2816.41
8_2	SAE1 #2	16.36	4096.97	158.24	3473.63
8_2	SAE1 #2	21.51	3314.72	169.1	1857.83
8_2	SAE1 #2	19.57	5139.46	194.6	3128.22
8_2	SAE1 #2	12.8	4682.54	130.61	3434.94
8_2	SAE1 #2	31.59	6670.82	225.17	4202.6
8_2	SAE1 #2	36.73	4096.38	341.51	2973.66
8_2	SAE1 #2	13.1	2612.61	106.24	1757.84
8_2	SAE1 #2	13.74	2827.2	113.99	2367.84
8_2	SAE1 #2	13.71	2589.72	85.99	2112.34
8_2	SAE1 #2	15.34	1566.6	170.47	1167.37
8_2	SAE1 #2	18.28	3612.14	174.13	2867.96
8_2	SAE1 #2	23.47	4064.8	111.68	2719.59
8_2	SAE1 #2	19.66	3610.8	119	2347.01
8_2	SAE1 #2	18.04	3707.83	176.82	2365.11
8_2	SAE1 #2	16.62	4549	224.3	2873.77
8_2	SAE1 #2	20.07	1649.18	116.84	1472.08
8_2	SAE1 #2	16.69	3428.33	91.79	2488.84
8_2	SAE1 #2	13.51	4346.5	111.59	2725.12
8_2	SAE1 #2	13.8	2687.98	65.42	2084
8_2	SAE1 #2	7.31	5014.56	87.7	2915.13
8_2	SAE1 #2	3.8	6563.53	51.75	5933.31
8_2	SAE1 #2	39.27	8331.63	270.74	4311.03
8_2	SAE1 #2	5.96	2938.98	41.24	2033.77
8_2	SAE1 #2	15.52	2592.07	72.43	2063.86
8_2	SAE1 #2	2.65	3723.5	155.4	2416.31
8_2	SAE1 #2	17.44	4094.84	83.72	2152.19
8_2	SAE1 #2	15.68	3446.9	125.94	2032.37
8_2	SAE1 #2	15.66	1605.53	178.95	1162.86
8_2	SAE1 #2	15.13	6674.13	258.06	2840.82
8_2	SAE1 #2	15.04	2227.25	138.22	1547.32
8_2	SAE1 #2	13.85	4432.27	134.12	2998.77
8_2	SAE1 #2	11.16	2430.38	155.13	2150.25
8_2	SAE1 #2	23	2894.59	98.68	2189.91
8_2	SAE1 #2	22.83	2628.96	165.42	1502.93
8_2	SAE1 #2	16.36	1868.61	141.65	1635.93
8_2	SAE1 #2	20.68	5227.79	147.73	2763.74
8_2	SAE1 #2	11.66	4777.78	107.64	3454.76
8_2	SAE1 #2	12.82	4002.02	134.38	2584.83
8_2	SAE1 #3	46.88	3430.48	364.73	2348.33
8_2	SAE1 #3	18.36	2097.87	189.93	1350.44
8_2	SAE1 #3	9.85	4008.42	105.11	2232.99
8_2	SAE1 #3	15.22	4479.38	113.03	2629.08
8_2	SAE1 #3	19.04	5734.42	96.15	3339.64
8_2	SAE1 #3	12.96	6022.74	110.66	2980.06
8_2	SAE1 #3	15.29	4697.85	148.29	2720.83
8_2	SAE1 #3	19.86	2727	172.12	1836.73
8_2	SAE1 #3	19.2	4201.03	188.38	2221.94
8_2	SAE1 #3	17.3	3302.53	93.99	2314.3
8_2	SAE1 #3	15.5	5656.42	120.74	3159.88
8_2	SAE1 #3	13.69	3974.41	128.17	2830.86
8_2	SAE1 #3	13.65	4696	102.52	2504.01
8_2	SAE1 #3	1.55	1901.4	84.44	1518.15
8_2	SAE1 #3	12.5	2063.35	97.26	1537.12
8_2	SAE1 #3	14.2	5260.09	107.98	3154.28
8_2	SAE1 #3	20	4692.27	126.19	3548.39
8_2	SAE1 #3	17.1	2875.29	100.2	2197.63
8_2	SAE1 #3	17.16	4177.4	72.52	3259.33
8_2	SAE1 #3	11.24	5306.15	94.76	3171.24
8_2	SAE1 #3	11.36	5944.83	98.15	3685.81
8_2	SAE1 #3	19.61	4034.16	136.37	2710.59
8_2	SAE1 #3	18.49	2373.62	159.96	1350.26
8_2	SAE1 #3	27.2	3614.16	83.93	2701.69
8_2	SAE1 #3	9.55	2018.7	86.56	1590.51
8_2	SAE1 #3	14.2	1307.65	80.98	1029.41
8_2	SAE1 #3	23.72	6265.05	132.71	3623.49
8_2	SAE1 #3	13.21	5894.57	86.19	3409.23
8_2	SAE1 #3	5.37	2134.92	50.52	1749.37
8_2	SAE1 #3	11.63	1656.06	123.89	1129.38
8_2	SAE1 #3	26.03	3254.27	110.77	2026.6
8_2	SAE1 #3	10.24	3423.19	118.58	2392.3
8_2	SAE1 #3	14.38	4858.57	69.85	4009.33
8_2	SAE1 #3	10.56	3654.38	151.22	1821.48
8_2	SAE1 #3	17.14	4322.99	86.1	2460.24
8_2	SAE1 #3	10.01	1780.85	66.2	1690.76
8_2	SAE1 #3	24.46	4261.15	176.3	2243.19
8_2	SAE1 #3	28.71	3244.7	92.85	2363.11
8_2	SAE1 #3	22.95	1380.24	102.76	1134.49
8_2	SAE1 #3	18.99	4841.09	110.2	2727.79
8_2	SAE1 #3	19.86	5283.48	139.88	2926.54
8_2	SAE1 #3	13.83	10788.7	121.99	4636.74
8_2	SAE1 #3	53.44	3856.63	350.38	3092.68
8_2	SAE1 #3	21.4	2691.17	134.47	1754.91
8_2	SAE1 #3	17.9	2529.48	157.99	1836.33
8_2	SAE1 #3	14.26	2279.39	116.62	1854.34
8_2	SAE1 #3	3.08	2050.24	104.32	1812.84
8_2	SAE1 #3	22.13	5348.75	163.56	2556.38
8_2	SAE1 #3	15.22	6218.22	160.36	2910.77
8_2	SAE1 #4	25.42	3091.79	161.33	3209.34
8_2	SAE1 #4	26.77	3274.72	188.87	2634.41
8_2	SAE1 #4	70.6	5632.46	317.51	3833.17
8_2	SAE1 #4	25.4	4541.54	173.42	2743.29
8_2	SAE1 #4	20.53	2504.62	149.44	2286.78
8_2	SAE1 #4	25.58	3585.86	175.06	2686.39
8_2	SAE1 #4	24.96	1538.75	106.9	1620.94
8_2	SAE1 #4	22.17	3012.58	147.25	2307.57
8_2	SAE1 #4	8.39	1628.82	96.46	1480.38
8_2	SAE1 #4	30.12	2883.47	143.64	2513.12
8_2	SAE1 #4	19.64	3874.06	111.29	2761.77
8_2	SAE1 #4	32.89	3770.29	148.44	2880.25
8_2	SAE1 #4	11.56	3340.61	110.56	2047.85
8_2	SAE1 #4	23.18	4035.43	129.88	2696.37
8_2	SAE1 #4	14.44	4165.24	80.66	2818.8
8_2	SAE1 #4	7.91	5232.68	87.02	4113.81
8_2	SAE1 #4	14.13	3504.2	93.14	3130.79
8_2	SAE1 #4	14.9	3251.28	54.74	2411.6
8_2	SAE1 #4	7.5	2555.6	102.49	3252.1
8_2	SAE1 #4	12.66	3425.77	54.2	2398.98
8_2	SAE1 #4	4.3	3244.28	62.97	2205.4
8_2	SAE1 #4	9.72	1673.08	91.84	1397.36
8_2	SAE1 #4	24.34	5183.29	134.4	2823.52
8_2	SAE1 #4	38.44	3329.88	150.52	2108.25
8_2	SAE1 #4	11.24	4309.02	103.4	3381.41
8_2	SAE1 #4	24.71	3359.33	117.23	2579.1
8_2	SAE1 #4	23.86	2109.44	126.51	1621.34
8_2	SAE1 #4	29.78	3378.34	180.28	2984.8
8_2	SAE1 #4	20.55	2728.41	165.97	3342.59
8_2	SAE1 #4	14.83	5110	78.04	4319.68
8_2	SAE1 #4	24.05	2635.82	136.6	1994.86
8_2	SAE1 #4	5.17	5785.97	69.26	3769.97
8_2	SAE1 #4	10.28	3302.15	58.81	2384.24
8_2	SAE1 #4	23.61	3221.24	151.47	3257.85
8_2	SAE1 #4	19.66	2481.34	162.65	2411.03
8_2	SAE1 #4	23.73	3322.16	135.02	2943.57
8_2	SAE1 #4	26.45	2341.85	144	2256.02
8_2	SAE1 #4	16.91	3504.43	100.73	2523.8
8_2	SAE1 #4	13.53	4169.22	107.16	3079.49
8_2	SAE1 #4	21.8	3857.49	119.11	3097.96
8_2	SAE1 #4	59.11	3393.27	271.25	2458.02
8_2	SAE1 #4	25.8	2713.85	136.32	1705.32
8_2	SAE1 #4	22.33	1955.12	80.62	1380.27
8_2	SAE1 #4	31.27	2603.54	116.12	2392.58
8_2	SAE1 #4	8.14	3834.19	106.04	2899.25
8_2	SAE1 #4	28.2	1911.05	127.61	1680.46
8_2	SAE1 #4	24.36	1247.79	107.66	1002.93
8_2	SAE1 #4	19.15	3094.49	112.69	2673.38
8_2	SAE1 #4	23.84	2909.98	122.67	2311.42
8_2	SAE1 #4	32.3	2649.37	131.22	2256.48
8_2	SAE1 #4	30.52	2844.01	202.67	2008.43
8_2	SAE1 #4	26.49	2923.59	139.25	1755.55
