# Supplementary material for: An engineered transcriptional reporter of protein localization identifies regulators of mitochondrial and ER membrane protein trafficking in high-throughput CRISPRi screens
Source: eLife. 2021 Aug 20;10:e69142. doi: 10.7554/eLife.69142 (PMC8423448; doi:10.7554/eLife.69142)
Supplement: Figure 4—figure supplement 1—source data 2. [file elife-69142-fig4-figsupp1-data2.xlsx]

## Sheet: Fig 4 - S1J
Number	sgRNA	Mito_area	Mito_AKAP1-sum	NonMito_area	NonMito_AKAP1-sum
1	NT	135.45	8319502	23.2	930877
2	NT	107.9	7270675	24.72	1068648
3	NT	100.02	9291864	16.66	898645
4	NT	210.21	13807541	43.13	1933617
5	NT	186.56	16036984	18.59	838202
6	NT	96.75	7709950	10.71	530927
7	NT	95.63	6040183	20.56	724555
8	NT	145.39	9196680	31.76	1259517
9	NT	76.59	6803645	19.22	932844
10	NT	145.53	12878523	23.2	1066060
11	NT	125.1	8789108	21.41	1090816
12	NT	90.48	6672865	20.11	995701
13	NT	98.68	8616774	22.49	972016
14	NT	81.88	7805953	28.4	1366892
15	NT	111.22	8753273	14.78	632083
16	NT	127.34	9146693	18.68	774925
17	NT	113.95	9115934	16.57	816860
18	NT	123.85	10404901	23.43	1044183
19	NT	141.68	16818640	19.62	1225200
20	NT	74.4	10216796	17.2	1065033
21	NT	180.02	24779241	33.86	2574875
22	NT	123.45	18425364	31.49	2342247
23	NT	108.04	17814059	23.96	1782251
24	NT	129.49	21846562	21.86	2038889
25	NT	174.82	27488450	39.73	3166092
26	NT	150.23	20916492	21.9	1379493
27	NT	119.19	13608715	25.44	1616565
28	NT	75.79	10780498	9.76	697122
29	NT	116.46	17837410	20.65	1324325
30	NT	87.07	11512483	22.31	1699033
31	NT	271.53	22546790	33.19	1436529
32	NT	102.84	12115917	14.87	752816
33	NT	92.63	11110570	21.01	1214230
34	NT	181.67	17458775	29.56	1671055
35	NT	241.61	21266040	31.26	1633919
36	NT	232.69	22193965	31.8	1426663
37	NT	245.5	30171336	39.06	1959321
38	NT	151.4	13299962	33.06	1692494
39	NT	91.69	10282216	17.92	1058221
40	NT	131.87	15797313	20.11	1084433
41	NT	71.85	10498679	13.66	944345
42	NT	102.04	13338497	21.54	1160887
43	NT	176.93	20652853	27.1	1685407
44	NT	110.77	15048709	14.42	1040075
45	NT	203.31	22764582	26.38	1528456
46	NT	174.91	20383123	32.16	2000953
47	NT	178.81	17976438	20.83	1103364
48	NT	109.92	11997833	30.64	1900455
49	NT	148.8	17124949	28.62	1503195
50	NT	302.48	20508018	36.55	1380246
51	NT	93.03	9374091	15.05	754496
52	NT	122.73	11123684	6.54	257161
53	NT	105.13	10662753	18.14	794488
54	NT	83.72	8252485	16.17	852355
55	NT	294.5	19413579	26.7	1014622
56	NT	317.93	20197280	30.06	1129085
57	NT	125.28	16197890	17.51	1119749
58	NT	118.52	14314374	54.51	3451407
59	NT	225.48	15369191	18.41	670017
60	NT	191.62	23593226	19.39	1316279
61	NT	264.76	21461156	45.24	2233121
62	NT	186.06	39490382	30.1	2934773
63	NT	137.96	20896295	21.32	1380201
64	NT	207.43	32042233	24.1	1733219
65	NT	185.03	35633321	21.99	1803974
66	NT	110.77	17724663	17.42	1210209
67	NT	111.67	17772083	21.41	1421005
68	NT	145.62	23107820	22.35	1555473
69	NT	122.91	19424842	23.47	1688300
70	NT	247.25	33184245	22.93	1740074
71	NT	323.75	40047158	25.71	1694108
72	NT	278.11	31978627	25.71	1395606
73	NT	212	28001092	13.35	856789
74	TRC40	200.94	30965064	44.39	3981968
75	TRC40	247.97	42892802	33.59	3306624
76	TRC40	68.31	10596748	20.96	1890004
77	TRC40	87.7	19364957	17.24	1681919
78	TRC40	251.24	44217805	43.67	4417072
79	TRC40	156.1	34735811	27.1	2998454
80	TRC40	198.87	23103965	26.52	1934211
81	TRC40	170.43	23405005	40	2917348
82	TRC40	120.76	23565093	19.04	1487123
83	TRC40	110.19	19373586	22.49	1810674
84	TRC40	156.99	26039910	34.09	3176788
85	TRC40	189.96	26602258	18.95	1525290
86	TRC40	148.53	20146714	19.04	1595736
87	TRC40	172.63	23366913	36.64	2971065
88	TRC40	112.38	22156183	12.32	1030078
89	TRC40	135.36	24892507	12.94	1242802
90	TRC40	164.83	24152823	41.79	3766279
91	TRC40	205.64	39267199	32.74	3467276
92	TRC40	128.15	20675557	19.98	1758211
93	TRC40	130.03	20138919	18.77	1404834
94	TRC40	110.5	17407305	18.41	1814772
95	TRC40	94.6	13052286	12.41	997481
96	TRC40	146.78	22347106	22.84	1902111
97	TRC40	125.19	18654391	22.53	1864892
98	TRC40	154.13	24103323	16.84	1457836
99	TRC40	312.78	47005398	26.07	2134670
100	TRC40	216.43	37312680	25.84	2202548
101	TRC40	190.41	24841204	53.26	3841691
102	TRC40	115.2	15277507	26.11	1947591
103	TRC40	174.24	26885672	20.11	1700629
104	TRC40	142.21	18650731	22.13	1578246
105	TRC40	153.01	23158844	28.49	1968135
106	TRC40	217.24	39100797	50.48	4075064
107	TRC40	232.33	51049498	27.82	3208590
108	TRC40	142.08	20790265	29.16	2707263
109	TRC40	116.46	19568974	22.66	2405123
110	TRC40	100.56	15504736	19.48	1709081
111	TRC40	170.48	25970161	27.68	2384149
112	TRC40	153.86	27121615	21.59	2018517
113	TRC40	125.19	26461911	13.57	1398981
114	TRC40	94.24	17763505	13.35	1226644
115	TRC40	144.36	22344152	29.92	2812607
116	TRC40	132.27	23588472	20.47	2118337
117	TRC40	150.23	21837230	28.04	2277343
118	TRC40	137.38	21937756	21.01	1694139
119	TRC40	112.2	14951932	19.66	1588825
120	SAE1	167.74	25953856	19.31	1445527
121	SAE1	133.61	31424827	31.71	3156088
122	SAE1	109.96	25527115	13.21	1510542
123	SAE1	181.09	41405481	39.91	4370291
124	SAE1	137.38	31237338	21.68	2610574
125	SAE1	235.83	37686749	43.18	4006230
126	SAE1	202.59	35843445	45.6	5166158
127	SAE1	150.63	39023466	22.22	2612911
128	SAE1	109.87	18882097	22.4	2102905
129	SAE1	114.76	22222382	18.19	1649354
130	SAE1	209.13	43787963	24.81	2366821
131	SAE1	92.81	17535150	26.38	2765373
132	SAE1	204.74	37604581	44.84	4482358
133	SAE1	148.04	24297746	31.89	2963915
134	SAE1	111.8	20224285	17.92	1726503
135	SAE1	94.51	17898428	15.27	1040868
136	SAE1	125.77	28576265	24.28	2871288
137	SAE1	286.13	57869600	26.11	2854110
138	SAE1	99.21	18828218	15.14	1623732
139	SAE1	97.51	21932140	14.96	1664198
140	SAE1	125.19	24213476	17.02	2021461
141	SAE1	253.07	38926402	26.02	2105511
142	SAE1	285.1	43744874	26.61	2265276
143	SAE1	130.7	27615811	19.08	2021244
144	SAE1	248.28	50190961	32.21	2884306
145	SAE1	297.77	49934652	32.43	3211452
146	SAE1	307.23	70598175	35.74	4046731
147	SAE1	260.82	45774851	25.93	2311913
148	SAE1	147.9	29886773	14.2	863105
149	SAE1	152.2	27356249	23.78	2282284
150	SAE1	81.21	17959065	17.33	1994175
151	SAE1	124.74	31344983	20.34	2178927
152	SAE1	209	39479408	31.85	3310052
153	SAE1	255.63	60868014	39.55	5111300
154	SAE1	182.88	32935410	43.72	4921637
155	SAE1	258.72	50935672	39.33	4844006
156	SAE1	90.84	15517188	16.21	1683207
157	SAE1	122.15	23777976	24.41	2461559
158	SAE1	210.21	39996485	20.92	2239854
159	SAE1	124.25	22989437	23.83	2515222
160	SAE1	211.95	39432781	22.35	2325137
161	SAE1	127.12	19677457	24.14	2288895
162	SAE1	98.41	13145804	21.32	1990138
163	SAE1	168.33	32565954	17.6	1718840
164	SAE1	197.26	39737404	20.51	1940786
