# Supplementary material for: An engineered transcriptional reporter of protein localization identifies regulators of mitochondrial and ER membrane protein trafficking in high-throughput CRISPRi screens
Source: eLife. 2021 Aug 20;10:e69142. doi: 10.7554/eLife.69142 (PMC8423448; doi:10.7554/eLife.69142)
Supplement: Figure 4—source data 1. [file elife-69142-fig4-data1.xlsx]

## Sheet: Fig 4E
Experiment	Guide	Rescue	Golgi_Area	G_mTA-Intensity	Mito_Area	M_mTA-Intensity
10_22	NT	SAE1	24.94	1004.04	175.27	747.27
10_22	NT	SAE1	24.05	635.23	178.51	639.04
10_22	NT	SAE1	25.74	4335.7	123.43	3071.35
10_22	NT	SAE1	34.03	3249.48	125.62	2706.65
10_22	NT	SAE1	24.3	688.97	147.56	742.71
10_22	NT	SAE1	25.17	1201.71	154.44	928.61
10_22	NT	SAE1	40.16	2377.74	157.83	2642.54
10_22	NT	SAE1	27.04	1785.85	117.24	1486.24
10_22	NT	SAE1	20.52	2291.72	113.42	2032.44
10_22	NT	SAE1	15.98	4074.01	119.61	3030.69
10_22	NT	SAE1	24.59	3209.83	157.6	2970.95
10_22	NT	SAE1	12.94	3445.89	142.15	2095.14
10_22	NT	SAE1	18.24	2959.3	117.16	2205.4
10_22	NT	SAE1	16.66	2441.85	121.96	1722.15
10_22	NT	SAE1	16.25	3849.81	105.67	3281.64
10_22	NT	SAE1	4.89	3303.23	101.51	2344.36
10_22	NT	SAE1	20.87	2914.32	128.84	1761.63
10_22	NT	SAE1	20.52	2666.11	145.81	2525.17
10_22	NT	SAE1	28.68	2246.51	113.4	1987.07
10_22	NT	SAE1	19.18	1166.4	132.53	992.83
10_22	NT	SAE1	8.37	3493.54	65.3	3108.41
10_22	NT	SAE1	21.12	1442.39	90.36	1523.37
10_22	NT	SAE1	33.51	1299.68	104.62	991.84
10_22	NT	SAE1	20.73	845.15	103.22	761.67
10_22	NT	SAE1	28.96	1555.1	80.09	1694.97
10_22	NT	SAE1	25.46	800.44	138.24	784.46
10_22	NT	SAE1	18.7	2344.48	134.52	1713.25
10_22	NT	SAE1	6.86	2299.3	82.52	1518.33
10_22	NT	SAE1	22.13	1914.22	175.7	1404.81
10_22	NT	SAE1	11.86	1333.64	109.9	1011.54
10_22	NT	SAE1	13.81	2610.91	163.02	2000.54
10_22	NT	SAE1	15.45	1024.49	151.88	862.14
10_22	NT	SAE1	35.95	2791.05	265.44	2158.53
10_22	NT	SAE1	14.51	3415.87	156.05	2474.25
10_22	NT	SAE1	21.26	3641.72	81.65	2928.72
10_22	NT	SAE1	25.83	2334.68	146.9	2337.34
10_22	NT	SAE1	19.24	2879.34	168.57	2988.56
10_22	NT	SAE1	24.37	1899.04	215.04	1270.61
10_22	NT	SAE1	19.82	1389.91	142.81	901.81
10_22	NT	SAE1	14.58	3853.32	93.88	2635.7
10_22	NT	SAE1	15.06	1598.08	93.08	1176.83
10_22	NT	SAE1	22.38	1056.16	81.71	1176.62
10_22	NT	SAE1	17.62	4746.17	106.47	3805.57
10_22	NT	SAE1	17.53	2919.97	96.6	2535.3
10_22	NT	SAE1	22.36	2945.69	129.97	1719.68
10_22	NT	SAE1	11.08	1830.61	97.21	1485.75
10_22	NT	SAE1	20.98	936.25	132.34	798.68
10_22	NT	SAE1	5.58	1232.41	130.92	1117.53
10_22	NT	SAE1	8.92	2879.83	86.68	3027.53
10_22	NT	SAE1	13.8	2946.98	90.2	2092.46
10_22	NT	SAE1	14.01	5499.47	62.54	3709.9
10_22	NT	SAE1	21.4	3619.01	86.83	2732.51
10_22	NT	SAE1	23.77	1124.47	89.83	996.48
10_22	SAE1	SAE1	20.14	3141.58	123.06	2687.05
10_22	SAE1	SAE1	22.92	1845.86	149.3	1791.46
10_22	SAE1	SAE1	24.25	1820	158.49	1746.39
10_22	SAE1	SAE1	24.8	2777.71	145.96	1674.39
10_22	SAE1	SAE1	22.81	2497.36	124.23	1858.85
10_22	SAE1	SAE1	6.47	1495.91	63.09	1444.85
10_22	SAE1	SAE1	21.32	3465.48	191.06	2604.62
10_22	SAE1	SAE1	17.01	2163.5	88.48	1459.88
10_22	SAE1	SAE1	20.57	1857.17	141.16	1366.74
10_22	SAE1	SAE1	20.14	1491.67	120.23	1067.87
10_22	SAE1	SAE1	20.71	2944.46	104.55	2511.5
10_22	SAE1	SAE1	20.66	3379.89	101.56	3170.46
10_22	SAE1	SAE1	18.74	3429.94	76.68	2348.42
10_22	SAE1	SAE1	27.08	1099.12	100.34	1065.05
10_22	SAE1	SAE1	21.39	1428.87	121.64	1148.06
10_22	SAE1	SAE1	19.2	1843.92	162.63	1572.17
10_22	SAE1	SAE1	29.53	1197.55	139.13	1029.22
10_22	SAE1	SAE1	15.38	2336.46	75.68	1763.64
10_22	SAE1	SAE1	71.86	1668.57	211.06	1391.44
10_22	SAE1	SAE1	14.84	1047.44	51.11	879.69
10_22	SAE1	SAE1	7.52	1142.03	124.62	1098.49
10_22	SAE1	SAE1	24.39	1249.92	76.68	1101.91
10_22	SAE1	SAE1	10.6	2892.86	269.97	2066.84
10_22	SAE1	SAE1	19.02	1041.33	147.02	1040.9
10_22	SAE1	SAE1	18.26	1357.75	127.5	1150.89
10_22	SAE1	SAE1	31.2	1758.55	112.28	1722.62
10_22	SAE1	SAE1	11.96	2115	69.62	1787.17
10_22	SAE1	SAE1	23.08	2634.3	71.15	2049.78
10_22	SAE1	SAE1	25.23	1433.98	109.94	1164.98
10_22	SAE1	SAE1	21.53	3716.94	115.52	3061.46
10_22	SAE1	SAE1	20.91	1017.15	89.39	865.43
10_22	SAE1	SAE1	32.43	1940.96	134.76	1396.22
10_22	SAE1	SAE1	28.04	1804.09	152.27	1465.88
10_22	SAE1	SAE1	22.26	909.89	111.41	842.06
10_22	SAE1	SAE1	18.12	2500.35	119.27	1670.59
10_22	SAE1	SAE1	12.73	1752.71	59.66	1474.02
10_22	SAE1	SAE1	26.22	1821.24	53.58	1375.32
10_22	SAE1	SAE1	14.45	3115.83	85.62	1813.95
10_22	SAE1	SAE1	22.24	1926.67	123.08	1906.69
10_22	SAE1	SAE1	14.51	940.62	138.63	862.7
10_22	SAE1	SAE1	24.23	2161.45	116.55	1907.89
10_22	SAE1	SAE1	18.2	767.33	115.09	732.09
10_22	SAE1	SAE1	10.76	3937.77	112.18	2714.76
10_22	SAE1	SAE1	16.62	3769.09	77.42	2537.81
10_22	SAE1	SAE1	31.04	1017.32	126.77	1083.54
10_22	SAE1	SAE1	26.26	1382.76	150.76	1453.15
10_22	SAE1	SAE1	20.85	1815.84	91.15	1439.65
10_22	SAE1	SAE1	18.44	1508.77	132.92	1456.25
10_22	SAE1	SAE1	22.83	2222.87	88.34	2059.35
10_22	SAE1	SAE1	22.97	2491.19	46.72	2207.23
10_22	SAE1	SAE1	13.9	2538.47	49.72	2344.66
10_22	SAE1	SAE1	21.16	2651.84	91.63	1870.23
10_22	SAE1	SAE1	7.68	1738.62	79.73	1478.83
10_22	SAE1	SAE1	8.21	1907.25	58.93	2155.3
10_22	SAE1	SAE1	16.6	1661.99	96.59	1989.17
10_22	SAE1	SAE1	16.78	931.28	93.94	888.4
10_22	SAE1	SAE1	13.53	1967.25	110.03	1839.13
10_22	SAE1	SAE1	13.51	2481.39	72.41	1877.74
10_22	SAE1	SAE1	27.06	2533.38	117.78	2013.09
10_22	SAE1	SAE1	27.11	2715.3	115.41	2038.55
10_22	SAE1	SAE1	36.09	939.45	187.06	823.23
10_22	NT	nfBFP	4.11	1667.92	81.33	1105.95
10_22	NT	nfBFP	21.05	2347.37	99.06	2041.87
10_22	NT	nfBFP	15.36	812.53	124.16	687.22
10_22	NT	nfBFP	30.15	785.22	138.6	714.2
10_22	NT	nfBFP	21.6	1949.42	93.03	1569.99
10_22	NT	nfBFP	17.51	1240.07	146.72	1074.02
10_22	NT	nfBFP	17.05	1485.33	76.52	1635.7
10_22	NT	nfBFP	14.84	2651.04	75.18	2206.84
10_22	NT	nfBFP	28.28	1183.68	136.92	987.63
10_22	NT	nfBFP	6.7	2354.66	59.31	1429.96
10_22	NT	nfBFP	34.35	1910.04	205.12	1206.44
10_22	NT	nfBFP	16.53	1988.91	75.64	1828.05
10_22	NT	nfBFP	16.64	869.45	123.54	773.34
10_22	NT	nfBFP	16.46	1362.51	55.47	1411.86
10_22	NT	nfBFP	11.27	1284.09	49.62	1087.8
10_22	NT	nfBFP	31.47	2629.83	99.86	1873.09
10_22	NT	nfBFP	17.69	2107.28	98.84	1547.4
10_22	NT	nfBFP	15.61	2218.33	66.17	1540.29
10_22	NT	nfBFP	11.45	3247.34	126.22	2236.79
10_22	NT	nfBFP	17.32	3035.56	70.63	2506.23
10_22	NT	nfBFP	26.84	3347.49	100.46	2621.49
10_22	NT	nfBFP	6.63	2181.12	110.47	1754.7
10_22	NT	nfBFP	14.06	978.69	50.36	895.74
10_22	NT	nfBFP	23.52	1568.47	94.24	1423.99
10_22	NT	nfBFP	31.86	2724.92	151.84	2174.99
10_22	NT	nfBFP	20.27	1401.1	83.56	1253.83
10_22	NT	nfBFP	56.73	1280.6	352.76	981.56
10_22	NT	nfBFP	18.42	2240.58	116.62	2007.6
10_22	NT	nfBFP	15.93	3354.55	52.66	2668.8
10_22	NT	nfBFP	16.2	2675.42	59.45	2080.76
10_22	NT	nfBFP	29.42	851.03	142.01	675.27
10_22	NT	nfBFP	36.66	1145.53	131.91	806.22
10_22	NT	nfBFP	20.25	2179.44	115.66	2169.02
10_22	NT	nfBFP	31.18	2016.44	136.12	1803.84
10_22	NT	nfBFP	25.8	1901.35	157.17	1453.38
10_22	NT	nfBFP	25.35	1109.6	119.96	962.94
10_22	NT	nfBFP	5.35	869.15	57.26	815.48
10_22	NT	nfBFP	18.76	2041.66	95.89	2245.38
10_22	NT	nfBFP	20.2	3501.4	89.16	2122.55
10_22	NT	nfBFP	23.24	3258.88	94.51	2275.4
10_22	NT	nfBFP	24.6	1178.69	92.53	1022.59
10_22	NT	nfBFP	17.67	1092.24	127.47	874.79
10_22	NT	nfBFP	26.28	2229.33	119.57	1782.51
10_22	NT	nfBFP	17.64	1975.23	63.06	1825.4
10_22	NT	nfBFP	16.78	1163.02	103.82	860.76
10_22	NT	nfBFP	11.72	1047.14	95.48	786.42
10_22	NT	nfBFP	8.36	1451.64	75.04	1270.26
10_22	NT	nfBFP	16.55	2884.34	108.52	2129.5
10_22	NT	nfBFP	8.14	3192.71	168.96	2006.56
10_22	NT	nfBFP	14.95	2227.21	136.55	1627.29
10_22	NT	nfBFP	17.37	891.33	114.51	1004.11
10_22	NT	nfBFP	16.64	4549.05	147.63	2505.41
10_22	SAE1	nfBFP	24.59	3168.65	139.18	2520.68
10_22	SAE1	nfBFP	20.5	3454.42	99.52	2742.5
10_22	SAE1	nfBFP	10.47	1086.29	96.46	749.49
10_22	SAE1	nfBFP	20.32	3773.64	195.89	2248.63
10_22	SAE1	nfBFP	46.12	2426.87	92.68	2417.92
10_22	SAE1	nfBFP	33.96	2259.12	180.39	1432.3
10_22	SAE1	nfBFP	10.6	2214.89	110.47	1208.7
10_22	SAE1	nfBFP	17.01	1046.85	101.94	864.28
10_22	SAE1	nfBFP	11.2	2480.8	94.47	1539.13
10_22	SAE1	nfBFP	40.85	3184.21	285.1	2047.99
10_22	SAE1	nfBFP	30.68	3965.4	119.41	2244.35
10_22	SAE1	nfBFP	20.21	3181.21	117.67	2473.7
10_22	SAE1	nfBFP	20.14	2261.27	92.89	1725.11
10_22	SAE1	nfBFP	27.45	2590.13	73.96	2321.29
10_22	SAE1	nfBFP	9.64	3617.92	36.16	2901.02
10_22	SAE1	nfBFP	29.17	2990.63	147.31	1803.85
10_22	SAE1	nfBFP	12.87	2133.83	67.93	1362.96
10_22	SAE1	nfBFP	16.96	1902.52	129.55	1293.61
10_22	SAE1	nfBFP	59.56	2228.66	287.45	1294.22
10_22	SAE1	nfBFP	15.63	2869.79	214.45	1622.04
10_22	SAE1	nfBFP	24.96	1376.44	96.57	1092.97
10_22	SAE1	nfBFP	27.66	2844.31	146.74	1918.84
10_22	SAE1	nfBFP	16.25	1107.51	88.12	800.01
10_22	SAE1	nfBFP	14.13	1353.12	88.36	956.12
10_22	SAE1	nfBFP	29.55	1803.89	258.1	1142.75
10_22	SAE1	nfBFP	51.93	1416.98	279.16	1074.22
10_22	SAE1	nfBFP	36.09	3648.57	271.22	2303.3
10_22	SAE1	nfBFP	26.97	1216.85	212.62	1020.51
10_22	SAE1	nfBFP	22.81	2388.43	157.44	1497.24
10_22	SAE1	nfBFP	16.07	2369.03	141.44	1828.81
10_22	SAE1	nfBFP	5.23	3217.94	49.51	2759.02
10_22	SAE1	nfBFP	21.37	2974.66	137.51	1763.64
10_22	SAE1	nfBFP	23.13	6011.09	111.86	3828.03
10_22	SAE1	nfBFP	18.19	4335.36	94.03	2660.39
10_22	SAE1	nfBFP	5.6	1579.76	82.45	1215.51
10_22	SAE1	nfBFP	13.08	2333.51	89.44	1537.84
10_22	SAE1	nfBFP	16.5	3179.46	120.84	2079.93
10_22	SAE1	nfBFP	12.98	2739.71	79.25	2051.38
10_22	SAE1	nfBFP	30.95	4080.86	63.43	3742.68
10_22	SAE1	nfBFP	14.52	2575.92	99.18	1843.86
10_22	SAE1	nfBFP	20.3	4162.89	103.88	2609.77
10_22	SAE1	nfBFP	9.51	3624.55	125.23	2069.37
10_22	SAE1	nfBFP	9.62	2449.6	61.01	1686.47
10_22	SAE1	nfBFP	18.65	1282.14	147.59	1085.99
10_22	SAE1	nfBFP	29.42	1962.07	156.52	1512.55
10_22	SAE1	nfBFP	5.19	3508	83.2	2531.04
10_22	SAE1	nfBFP	21.24	2623.94	133.28	1686.01
10_22	SAE1	nfBFP	16.14	1890.25	105.07	1546.79
10_22	SAE1	nfBFP	18.56	2917.85	114.9	2176.29
10_22	SAE1	nfBFP	18.56	5583.79	105.53	3192.27
