# Supplementary material for: An engineered transcriptional reporter of protein localization identifies regulators of mitochondrial and ER membrane protein trafficking in high-throughput CRISPRi screens
Source: eLife. 2021 Aug 20;10:e69142. doi: 10.7554/eLife.69142 (PMC8423448; doi:10.7554/eLife.69142)
Supplement: Figure 4—source data 2. [file elife-69142-fig4-data2.xlsx]

## Sheet: Fig 4G
Experiment	[ML-792]	Golgi_Area	G_mTA-Intensity	Mito_Area	M_mTA-Intensity
10_10	0 nM	25.58	2317	197.46	1814.48
10_10	0 nM	28.91	2186.95	236.55	1551.02
10_10	0 nM	12.12	2587.18	58.31	2633.42
10_10	0 nM	19.38	2869.76	148.73	2275.41
10_10	0 nM	31.66	2165.97	185.49	1891.37
10_10	0 nM	21.88	2351.75	145.71	1984.62
10_10	0 nM	26.19	2014.43	130.92	1907.44
10_10	0 nM	13.33	1611.88	90.52	1684.4
10_10	0 nM	25.69	2445.76	126.95	2244.27
10_10	0 nM	14.74	2676.59	98.2	2089.7
10_10	0 nM	38.56	2681.75	124.23	2101.55
10_10	0 nM	18.44	2344.43	79.25	2624.77
10_10	0 nM	15.96	1168.43	100.6	1169.8
10_10	0 nM	23.47	1972.02	101.81	1807.9
10_10	0 nM	31.48	1148.8	136.85	1162.95
10_10	0 nM	20.05	3607.23	124.23	3151.95
10_10	0 nM	15.52	3941.98	103.15	3855.71
10_10	0 nM	7.61	1723.59	132.27	1326.03
10_10	0 nM	12.44	1287.23	162.77	1067.08
10_10	0 nM	24.28	840.11	121.08	808.42
10_10	0 nM	20.23	930.82	166.97	895.42
10_10	0 nM	40.43	2011.25	216.85	1641.15
10_10	0 nM	39.18	1890.02	225.72	1452.65
10_10	0 nM	12.71	1997.24	95.59	1552.06
10_10	0 nM	20.66	2769.62	166.51	1644.33
10_10	0 nM	29.32	2584.52	108.91	2006.91
10_10	0 nM	21.88	1560.42	118.31	1451.07
10_10	0 nM	28.55	2107.65	138.13	1647.55
10_10	0 nM	19.57	2320.15	109.9	2444.29
10_10	0 nM	22.7	1457.57	94.93	1358.35
10_10	0 nM	30.52	2230.45	134.01	2134.96
10_10	0 nM	20.37	1781.29	103.38	1662.5
10_10	0 nM	24.36	1924.73	119.52	1657.41
10_10	0 nM	19.73	1654.99	97.81	1700.47
10_10	0 nM	11.7	2492.44	71.93	2312.37
10_10	0 nM	18.77	1586.22	141.83	1219.43
10_10	0 nM	28.23	1419.66	136.62	1086.1
10_10	0 nM	30.24	2592.44	88.27	2232.95
10_10	0 nM	17.62	2653.71	105.58	2337.36
10_10	0 nM	34.88	1517.34	136.39	1398.8
10_10	0 nM	28.16	2173.39	176.66	1733.96
10_10	0 nM	30.99	1812.6	171.93	1527.59
10_10	0 nM	31.16	819.97	121.1	782.51
10_10	0 nM	12.04	1476.78	58.54	1520.88
10_10	0 nM	23.02	1086.3	150.45	1016.6
10_10	0 nM	23.73	3655.87	89.17	3005.07
10_10	0 nM	12.64	3022.23	113.94	2777.75
10_10	0 nM	13.97	2149.61	85.87	1806.01
10_10	50 nM	22.88	2662.99	84.52	2867
10_10	50 nM	19.52	2887.37	86.95	2900.2
10_10	50 nM	15.15	4516.39	92.5	2886.31
10_10	50 nM	17.42	2684.68	84.32	2873.54
10_10	50 nM	16.37	2463.28	135.09	2329.18
10_10	50 nM	17.69	3566.87	153.97	3074.18
10_10	50 nM	24.53	3117.9	120.78	2408.62
10_10	50 nM	16.46	2259.21	116.82	1947.48
10_10	50 nM	8.53	2232.29	114.95	2356.76
10_10	50 nM	33.44	1440.78	108.2	1442.56
10_10	50 nM	33.21	1955.19	112.48	1490.96
10_10	50 nM	18.51	2208.94	110.24	1451.63
10_10	50 nM	19.95	2901.98	100.84	2454.21
10_10	50 nM	22.47	2955.74	115.48	2630.51
10_10	50 nM	32.11	1485.38	194.54	1599.19
10_10	50 nM	17.71	2199.38	68.89	1653.98
10_10	50 nM	27.45	1501.59	86.95	1365.48
10_10	50 nM	30.2	3780.1	130.17	3555.68
10_10	50 nM	22.65	1171.16	73.16	1264.54
10_10	50 nM	15.22	1101.7	87.88	1025.8
10_10	50 nM	12.94	3926.29	74.31	3303.38
10_10	50 nM	11.86	3045.97	72.64	2888.28
10_10	50 nM	18.04	3249.75	82.97	2732.67
10_10	50 nM	15.24	3549.12	51.73	3522.33
10_10	50 nM	19.45	1673.67	61.07	1712.05
10_10	50 nM	18.19	4008.75	64.02	3677.79
10_10	50 nM	20.52	2229.07	90.26	1866.07
10_10	50 nM	13.8	3212.3	96.87	3053.67
10_10	50 nM	46.51	2502.37	199.7	2193.65
10_10	50 nM	27.61	1604.55	122.1	1376.67
10_10	50 nM	12.09	2695.9	60.94	2551.21
10_10	50 nM	4.78	3248.73	62.03	3496.05
10_10	50 nM	11.86	4775.4	87.95	4135.88
10_10	50 nM	17.62	3759.01	71.11	3848.06
10_10	50 nM	25.62	3250.81	146.15	3019.03
10_10	50 nM	19.11	3432.46	114.38	3206.39
10_10	50 nM	20.64	3292.92	88.96	3661.21
10_10	50 nM	15.86	2568.34	123.41	2192.07
10_10	50 nM	24.05	2346.34	169.97	1903.97
10_10	50 nM	18.19	2509.83	82.86	1947.39
10_10	50 nM	18.67	2644.44	104.11	2665.83
10_10	50 nM	15.72	1219.5	104.94	1197.78
10_10	50 nM	15.48	2008.58	88.91	1980.84
10_10	50 nM	15.38	1344.17	98.54	1301.61
10_10	50 nM	20.57	3551.55	85.92	2904.02
10_10	50 nM	13.32	1864.45	129.12	1540.1
10_10	50 nM	23.48	4601.28	136.75	3351.92
10_10	50 nM	24.87	4296.15	102.1	2825.92
10_10	50 nM	16.11	2385.67	114.13	1965.27
10_10	50 nM	26.12	2437.85	108.36	1878.32
10_10	50 nM	25.9	2970.77	116.16	2011.79
10_10	50 nM	16.96	1859.23	114.22	1672.07
10_10	50 nM	23.75	2254.14	117.87	2221.73
10_10	50 nM	12.25	1850.7	81.39	1879.3
10_10	50 nM	43.8	1658.5	201.76	1516.34
10_10	50 nM	18.74	3595.59	131.64	2923.84
10_10	50 nM	23.2	3267.51	121.19	2708.15
10_10	50 nM	19.59	2488.62	122.22	2349.07
10_10	50 nM	15.4	3665.33	94.81	3035.62
10_10	50 nM	16.62	2428.26	130.95	2393.59
10_10	50 nM	10.88	3075.4	65.97	2473.27
10_10	50 nM	21.64	3085.76	123.4	2585.41
10_10	50 nM	20.84	1583.58	87.64	1572.05
10_10	100 nM	5.3	3211.63	42.77	3608.37
10_10	100 nM	19.95	1852.95	65.78	1635.6
10_10	100 nM	12.92	2334.97	38.28	2909.97
10_10	100 nM	17.08	2193.85	63.06	3045.66
10_10	100 nM	12.41	3743.96	51.77	3445.61
10_10	100 nM	26.63	3103	89.3	2898.95
10_10	100 nM	23.68	2206.85	124.76	1453.83
10_10	100 nM	8.39	1338.97	98.03	1255
10_10	100 nM	14.2	2471.39	80.27	2116.09
10_10	100 nM	21.4	2942.09	78.6	2884.24
10_10	100 nM	39.09	1233.44	103.18	1460.92
10_10	100 nM	16.92	2741.94	49.19	3089.47
10_10	100 nM	14.1	1727.26	70.79	1592.3
10_10	100 nM	7.68	3052.32	65.03	3357.31
10_10	100 nM	34.19	1670.25	134.81	1386.53
10_10	100 nM	4.37	1506.38	76.92	1112.73
10_10	100 nM	7.22	1803.91	99.34	1738.51
10_10	100 nM	24.62	2735.06	63.5	3156.33
10_10	100 nM	26.51	3184.86	95.13	2814.5
10_10	100 nM	11.84	1841.62	71.7	2173.31
10_10	100 nM	47.68	1366.41	131.95	1482.57
10_10	100 nM	12.87	2250.73	81.44	2196.53
10_10	100 nM	18.83	3425.57	69.83	3557.15
10_10	100 nM	34.15	2135.79	117.44	2011.11
10_10	100 nM	22.04	1585.32	87.15	1723.43
10_10	100 nM	12.62	2948.44	86.47	2188.39
10_10	100 nM	18.29	1234.1	101.07	1031.24
10_10	100 nM	21.71	2240.72	99.02	1824.6
10_10	100 nM	17.44	2171.75	77.53	2025.13
10_10	100 nM	23.47	3280.24	98.92	2475.86
10_10	100 nM	17	1673.23	97	1596.99
10_10	100 nM	14.97	1351.56	71.5	1604.29
10_10	100 nM	39.77	2216.42	144.11	2192.51
10_10	100 nM	9.81	1969.57	40.6	1676.36
10_10	100 nM	30.99	1418.92	171.84	1279.53
10_10	100 nM	18.67	2118.35	129.48	1872.27
10_10	100 nM	4.07	1131.19	83.63	976.93
10_10	100 nM	13.72	2936.78	76.02	2477.21
10_10	100 nM	2.54	4647.45	89.42	3740.57
10_10	100 nM	23.38	3004.78	84.28	2823.41
10_10	100 nM	12.34	2286.42	96.05	1712.7
10_10	100 nM	30.17	3090.28	120.6	2717.17
10_10	100 nM	17.96	4235.34	118.97	3278.6
10_10	100 nM	26.99	1996.88	117.08	1565.59
10_10	100 nM	11.91	2045.66	80.73	1949.69
10_10	100 nM	7.61	3294.03	99.8	2455.51
10_10	100 nM	22.58	1451.12	142.44	1206.66
10_10	100 nM	18.26	3023.62	99.29	2176.65
10_10	100 nM	10.49	3528.74	105.44	2458.98
10_10	100 nM	20.8	3740.41	79.56	3376.86
10_10	100 nM	11.13	4764.99	83.43	3916.23
10_10	100 nM	27.38	2267.63	92.43	2164.35
10_10	100 nM	14.49	3489.4	70.83	3065.79
10_10	100 nM	13.65	3539.71	91.43	2585.53
10_10	100 nM	17.99	2648.38	80.43	2189.49
10_10	100 nM	13.78	1649.81	95.45	1276.47
10_10	100 nM	19.88	3679.31	79.72	3645.38
10_10	100 nM	15.24	1467.33	85.92	2017.8
10_10	100 nM	23.24	1795.08	89.85	1616.48
10_10	100 nM	13.71	2793.24	102.1	2393.08
10_10	100 nM	13.26	3490.47	123	2999.89
10_10	200 nM	21.08	4068.18	151.54	2772.96
10_10	200 nM	19.2	2518.04	93.88	2784.62
10_10	200 nM	21.37	2289.12	139.8	2131.7
10_10	200 nM	20.46	3113.41	140.94	2356.53
10_10	200 nM	33.16	2138.4	77.1	1974.81
10_10	200 nM	25.6	1833.86	107.54	1526.91
10_10	200 nM	4.18	2882.46	100.84	2262.75
10_10	200 nM	14.35	2718.01	98.26	2207.68
10_10	200 nM	15.25	2531.21	123.41	2046.37
10_10	200 nM	19.38	2688.1	118.68	2274.73
10_10	200 nM	18.35	1629.77	139.64	1512.55
10_10	200 nM	24.46	1869.85	74.08	1439.67
10_10	200 nM	19.34	1708.14	153.51	1698.74
10_10	200 nM	24.6	1271.19	122.81	1189.39
10_10	200 nM	17.35	2179.18	128.34	1680.36
10_10	200 nM	39.77	1963.2	206.19	1369.07
10_10	200 nM	18.68	2872.53	85.03	2820.69
10_10	200 nM	15.61	2311.89	151.31	1560.03
10_10	200 nM	20.98	1860.74	160.05	1472.53
10_10	200 nM	37.58	2108.01	211.84	1740.08
10_10	200 nM	11.11	1371.16	92.28	994.72
10_10	200 nM	18.76	1688.94	80.87	1278.74
10_10	200 nM	14.47	2087.85	102.9	1800.77
10_10	200 nM	19.52	2275.97	179.8	2131.05
10_10	200 nM	12.57	3500.25	41.33	3089.98
10_10	200 nM	14.2	2466.98	68.68	2346.72
10_10	200 nM	22.99	2895.98	88.3	2883.35
10_10	200 nM	12.02	1971.21	91.04	1756.5
10_10	200 nM	14.74	2960.31	80.91	3590.01
10_10	200 nM	20.12	2337.42	144.05	1876.39
10_10	200 nM	13.96	3294.32	98.29	2720.95
10_10	200 nM	15.79	2322.68	82.67	1792.89
10_10	200 nM	21.14	2171.47	97.8	1924.7
10_10	200 nM	16.37	2251.23	114.72	1599.07
10_10	200 nM	28.16	1817.4	113	1414.46
10_10	200 nM	22.31	1682.03	139.61	1497.77
10_10	200 nM	16.6	1820.22	128.27	1628.97
10_10	200 nM	8.89	4074.9	76.16	2702.49
10_10	200 nM	22.72	3449.82	167.06	2300.36
10_10	200 nM	15.63	3416.71	148.69	2110.85
10_10	200 nM	13.56	1784.26	92.36	1648.76
10_10	200 nM	15.68	1394.57	129.35	1116.38
10_10	200 nM	14.51	1651.45	146.74	1480.4
10_10	200 nM	12.91	1157.17	55.15	1110.76
10_10	200 nM	6.4	2645.03	79.52	2036.2
10_10	200 nM	15.48	1931.27	101.8	1412.16
10_10	200 nM	15.59	2056.61	47.68	1552.33
10_10	200 nM	20.8	2338.93	125.48	1915.72
10_10	200 nM	22.51	2821.26	149.1	2290.39
10_10	200 nM	17.03	2278.32	92.96	1851.63
10_10	200 nM	22.76	2012.11	117.81	1752.88
10_10	200 nM	22.19	1964.14	103.8	1676.22
10_26	0 nM	23.57	2327.7	114.54	1592.98
10_26	0 nM	20.76	1219.37	129.55	904.8
10_26	0 nM	5.08	878.79	52.85	759.51
10_26	0 nM	25.94	1517.14	82.28	1334.53
10_26	0 nM	23.7	2614.59	106.61	2337.35
10_26	0 nM	15.89	3127.97	113.62	1998.72
10_26	0 nM	11.09	1769.08	80.69	1412.89
10_26	0 nM	14.03	771.01	69.07	741.68
10_26	0 nM	18.13	894.17	83.47	757.24
10_26	0 nM	18.42	2721.79	125.65	1522.19
10_26	0 nM	13.21	4305.07	109.3	3117.08
10_26	0 nM	13.4	2900.87	71.13	2207.24
10_26	0 nM	15.45	1363.01	102.49	1225.53
10_26	0 nM	21.14	3985.49	106.12	2889.8
10_26	0 nM	15.08	1973.81	58.33	2148.65
10_26	0 nM	13.17	9083.61	56.27	7559.74
10_26	0 nM	10.68	2786.19	70.17	2572.98
10_26	0 nM	16.89	1528.11	71.31	1618.98
10_26	0 nM	13.51	3987.49	95.8	4829.51
10_26	0 nM	3.22	3096.82	90.52	2934.83
10_26	0 nM	14.92	3747.73	48.78	4036.3
10_26	0 nM	17.24	1231.48	57.26	995.94
10_26	0 nM	18.26	994.42	59.31	972.24
10_26	0 nM	16.92	1635.83	105.94	1769.02
10_26	0 nM	22.51	2892.75	91.86	2455.56
10_26	0 nM	22.19	2834.92	82.74	2200.57
10_26	0 nM	13.24	1101.94	74.42	929.98
10_26	0 nM	11.75	3644.85	30.77	3477.6
10_26	0 nM	23.52	1212.11	69.05	1057.19
10_26	0 nM	23.34	1207.62	84.66	1249.14
10_26	0 nM	7.06	1903.48	27.98	1787.18
10_26	0 nM	13.01	3286.77	53.16	2432.46
10_26	0 nM	7.88	4299.69	84.18	3285.65
10_26	0 nM	14.45	1335.66	73.6	1367.69
10_26	0 nM	5.33	1495.19	58.13	1366.08
10_26	0 nM	7.31	1855.13	40.55	1771.64
10_26	0 nM	5.72	5013.99	48.27	4956.66
10_26	0 nM	17.81	2246.33	92.21	1658.33
10_26	0 nM	10.03	2908.98	81.4	1906.01
10_26	0 nM	45.1	2010.41	213.14	1460.79
10_26	0 nM	12.71	3898.29	130.24	3360.24
10_26	0 nM	16.41	1286.1	92.8	960.12
10_26	0 nM	18.67	1135.79	96.8	980.21
10_26	0 nM	20.75	1558.21	96.23	1417.14
10_26	0 nM	17.14	2053.33	79.22	1654.82
10_26	0 nM	11.24	1084.66	102.7	936.87
10_26	0 nM	18.45	1724.66	145.76	1408.32
10_26	0 nM	12.25	3380.25	121.55	2620
10_26	0 nM	15	2799.02	129.67	2130.33
10_26	0 nM	23.11	2619.57	44.85	2290.28
10_26	0 nM	11.8	810.03	55.31	894.62
10_26	0 nM	15.56	838.85	58.81	948.79
10_26	0 nM	12.14	2598.35	88.78	2728.37
10_26	0 nM	13.23	863.26	51.34	874.43
10_26	0 nM	17.14	2589.96	68.59	2437.91
10_26	0 nM	14.58	2154.73	98.84	1732.53
10_26	0 nM	18.28	2299.92	105.78	1860.62
10_26	0 nM	21.88	1220.42	84.96	1109.66
10_26	0 nM	8.8	729.49	62.65	896
10_26	0 nM	21.35	1395.76	111.41	1206.15
10_26	0 nM	28.82	835.9	100.64	894.74
10_26	0 nM	15.32	1157.57	70.99	1408.45
10_26	0 nM	24.41	2305.79	111.82	2196.75
10_26	0 nM	9.55	740.93	100.14	797.21
10_26	0 nM	11.82	833.4	86.86	798.34
10_26	0 nM	14.33	1112.08	80.73	1029.57
10_26	0 nM	9.3	2227.68	117.78	1513.16
10_26	0 nM	2.54	1641.68	32.18	1453.66
10_26	500 nM	13.46	3902.65	138.99	2259.83
10_26	500 nM	18.03	1113.27	113.81	964.61
10_26	500 nM	12.37	2012.21	76.36	1258.18
10_26	500 nM	17.05	1008.7	53.49	1105.61
10_26	500 nM	32.73	1742.01	226.83	1602.5
10_26	500 nM	21.1	4738.68	165.08	4132.45
10_26	500 nM	19.63	1763.01	106.6	1361.32
10_26	500 nM	18.93	2999.67	127.84	2231.61
10_26	500 nM	15.24	3469.87	81.21	3411.35
10_26	500 nM	7.27	4703.83	75.7	3865.52
10_26	500 nM	10.47	2769.46	137.81	2035.33
10_26	500 nM	20.92	5267.89	117.74	3857.28
10_26	500 nM	14.63	4961.76	91.89	3313.28
10_26	500 nM	9.87	1914.46	87.31	1804.7
10_26	500 nM	30.08	2265.02	87.04	1677.17
10_26	500 nM	16.68	3910.96	111.72	3002.6
10_26	500 nM	15.27	4752.16	70.95	3115.02
10_26	500 nM	20.89	4466.53	80.8	4094.79
10_26	500 nM	15.29	3288.8	65.07	2697.14
10_26	500 nM	15.68	8567.6	91.52	6530.21
10_26	500 nM	9.26	1780.77	65.56	1300.83
10_26	500 nM	18.42	2570.15	80.69	2108.74
10_26	500 nM	17.14	6233.71	103.61	4661.96
10_26	500 nM	14.72	4494.34	96.46	3497.9
10_26	500 nM	30.58	2501.76	151.18	1468.13
10_26	500 nM	15.43	4051.33	116.68	2837.15
10_26	500 nM	21.65	6053.12	128.76	4972.09
10_26	500 nM	22.13	3899.16	143.31	2695.65
10_26	500 nM	12.23	1589.49	45.46	1263.05
10_26	500 nM	15.36	4574.25	83.89	4003.23
10_26	500 nM	32.98	5370.12	157.17	4753.09
10_26	500 nM	16.12	2143.17	149.37	1239.92
10_26	500 nM	15.68	3285.9	102.77	2210.31
10_26	500 nM	17.17	2464.5	143.36	1882.66
10_26	500 nM	18.67	3314.1	103.84	2650.73
10_26	500 nM	18.33	2865.73	122.79	2207.01
10_26	500 nM	19.77	1194.43	187.06	948.74
10_26	500 nM	8	3788.51	50.61	3371.33
10_26	500 nM	19.43	4172.71	136.25	3068.8
10_26	500 nM	18.47	2934	99.64	2205.53
10_26	500 nM	15.41	1686.56	71.45	1691.23
10_26	500 nM	23.22	1585.33	120.98	1119.19
10_26	500 nM	21.17	3436.85	133.44	1874.51
10_26	500 nM	7.08	2393.67	108.05	1690.77
10_26	500 nM	11.56	4294.73	43.61	4546.32
10_26	500 nM	25.97	1422.04	145.94	1017.12
10_26	500 nM	13.51	3752.27	75.15	3689.93
10_26	500 nM	13.55	3961.22	86.2	2536.66
10_26	500 nM	13.12	5793.29	76.46	4766.07
10_26	500 nM	13.4	6366.17	104.84	4511.58
10_26	500 nM	56.59	2262.92	200.68	1498.8
10_26	500 nM	15.45	2116.54	73.28	1556.25
10_26	500 nM	11.73	1501.37	54.28	1260.92
10_26	500 nM	21.17	4178.89	122.08	3481.66
10_26	500 nM	12.39	4213.36	92.78	3177.55
10_26	500 nM	22.22	1462.28	102.72	1295.27
10_26	500 nM	14.33	1640.3	75.45	1049.74
10_26	500 nM	17.49	3588.27	84.75	3762.37
10_26	500 nM	17.9	1361.61	107.8	1131.2
10_26	500 nM	24.85	2994.93	143.84	2169.42
10_26	500 nM	8.52	2980.3	89.92	2214.57
10_26	500 nM	17.65	5210.52	102.81	2902.39
10_26	500 nM	23.57	3931.96	119.52	3034.23
10_26	500 nM	28.98	2889.66	148.02	2047.55
10_26	1000 nM	19.84	4388.49	165.74	2830.62
10_26	1000 nM	14.06	3625.28	92.34	2505.79
10_26	1000 nM	12.37	4758.48	85.81	2618.37
10_26	1000 nM	15.29	1876.31	147.89	1444.4
10_26	1000 nM	30.33	4022.1	200.02	2665.25
10_26	1000 nM	61.33	4027.2	321.44	2350.37
10_26	1000 nM	13.14	1552.13	92.59	1493.54
10_26	1000 nM	26.19	4310.08	147.93	2435.82
10_26	1000 nM	12.84	3097.85	76.91	2946.54
10_26	1000 nM	24.44	5166.67	129.07	3569.72
10_26	1000 nM	15.82	1799.92	96.62	1649.5
10_26	1000 nM	16.39	1370.96	117.35	1021.87
10_26	1000 nM	40.21	1159.34	253.24	1007.01
10_26	1000 nM	18.65	1674.09	106.24	1318.92
10_26	1000 nM	6.6	4302.81	27.22	3489.8
10_26	1000 nM	19.79	4551.54	124.69	2911.99
10_26	1000 nM	19.29	5364.21	157.48	3619.42
10_26	1000 nM	16.5	4961.28	166.65	3628.07
10_26	1000 nM	19.38	3786.87	189.49	2128.93
10_26	1000 nM	15.95	5502.91	152.84	2897.83
10_26	1000 nM	12.16	2423.81	81.46	1610.94
10_26	1000 nM	2.2	4915.57	72.66	3184.49
10_26	1000 nM	21.87	4423.24	137.46	3178.65
10_26	1000 nM	22.72	2906.09	104.34	2653.52
10_26	1000 nM	41.8	2299.27	161.4	1563.87
10_26	1000 nM	16.53	2459.84	104.94	1411.14
10_26	1000 nM	12.37	2348.95	73.49	1361.7
10_26	1000 nM	16.66	4376.1	94.92	3027.41
10_26	1000 nM	23.61	8930.47	118.01	6515.47
10_26	1000 nM	10.84	5009.21	76.05	3344.7
10_26	1000 nM	3.61	2545.67	84.25	2137.56
10_26	1000 nM	18.99	3179.51	91.02	1753.64
10_26	1000 nM	16.41	5059.83	79.7	3635.18
10_26	1000 nM	10.52	4989.57	52.44	3565.77
10_26	1000 nM	16.32	7350.52	105.33	3784.03
10_26	1000 nM	9.76	2587.46	56.16	1769.71
10_26	1000 nM	6.65	3225.58	72.68	2613.75
10_26	1000 nM	11.45	7060.2	68.46	3595.27
10_26	1000 nM	7.56	4707.83	21.42	3132.28
10_26	1000 nM	27.38	2608.54	107.56	2113.06
10_26	1000 nM	11.16	2494.03	74.4	2302.9
10_26	1000 nM	13.56	2341.43	65.19	1929.94
10_26	1000 nM	14.1	2056.74	88.48	1938.93
10_26	1000 nM	12.05	4179.73	121.76	2850.44
10_26	1000 nM	2.72	2974.67	71.73	2219.18
10_26	1000 nM	34.1	3810.83	161.01	2755.77
10_26	1000 nM	12.68	5644.38	116.92	3761.62
10_26	1000 nM	21.28	4490.13	89.78	3159.87
10_26	1000 nM	27.7	3139.26	266.74	1648.46
10_26	1000 nM	14.83	2474.42	66.92	1476.23
10_26	1000 nM	5.56	6356.24	103.16	3668.62
10_26	1000 nM	22.04	1737.29	73.21	1372.99
10_26	1000 nM	8.21	1310.61	23.32	1030.95
10_26	1000 nM	33.56	4887.04	130.83	2829.37
10_26	1000 nM	22.26	5379.12	177.56	3372.75
10_26	1000 nM	18.2	6934.58	108.41	5021.93
