# Supplementary material for: An engineered transcriptional reporter of protein localization identifies regulators of mitochondrial and ER membrane protein trafficking in high-throughput CRISPRi screens
Source: eLife. 2021 Aug 20;10:e69142. doi: 10.7554/eLife.69142 (PMC8423448; doi:10.7554/eLife.69142)
Supplement: Figure 4—source data 3. [file elife-69142-fig4-data3.xlsx]

## Sheet: Fig 4I
Number	sgRNA	Mito_area	Mito_MAVS-sum	NonMito_area	NonMito_MAVS-sum
1	NT	273.36	87913040	36.19	4809574
2	NT	151.26	47463077	18.23	2459423
3	NT	241.02	76707161	28.62	4153229
4	NT	270.94	77631398	50.44	7151765
5	NT	207.07	53238820	20.87	2847422
6	NT	238.52	62693465	25.89	3165775
7	NT	196.81	30288253	34.8	3927738
8	NT	153.64	48860756	18.32	2588522
9	NT	176.3	45550165	41.57	5804671
10	NT	84.39	25378145	15.45	2492187
11	NT	169.09	56227383	23.74	3604279
12	NT	195.92	79240298	26.65	4386656
13	NT	192.83	81535433	43.4	8866318
14	NT	173.3	60905191	14.96	2173613
15	NT	227.85	80176668	29.97	5214307
16	NT	173.34	53295839	28.8	3835134
17	NT	231.21	83124746	23.38	3660341
18	NT	136.21	54184226	22.75	3714589
19	NT	113.23	28780773	15.54	2184715
20	NT	279.99	91237557	37	5453517
21	NT	124.07	51826688	25.62	4309705
22	NT	142.84	61146234	13.12	2085059
23	NT	251.42	75720582	44.25	7072025
24	NT	160.67	54330881	21.23	3166634
25	NT	185.26	58034173	26.29	3893169
26	NT	276.32	88522505	32.7	4796308
27	NT	220.28	83869514	36.64	5544396
28	NT	134.29	41237923	18.05	2702035
29	NT	233.86	72757048	27.23	4340246
30	NT	113.77	48075815	23.96	4001004
31	NT	145.71	48036144	27.95	4546989
32	NT	156.73	61756366	66.69	13318330
33	NT	145.75	55763593	23.47	4128638
34	NT	204.88	68826224	34.36	4307690
35	NT	286.49	98568504	37.27	5793404
36	NT	182.93	71985760	39.91	6362633
37	NT	162.64	49915813	23.92	3490380
38	NT	62.22	16723265	20.92	2851228
39	NT	63.83	17273109	14.74	2089858
40	NT	158.2	54728763	39.6	6882707
41	NT	161.43	50414399	30.14	3971738
42	NT	259.39	91901314	49.63	8714205
43	NT	128.73	39344157	18.01	2460915
44	NT	212.98	73786201	35.88	5844172
45	NT	148.71	51209692	29.38	4923896
46	NT	133.66	42596657	25.84	4136786
47	NT	139.12	41203690	30.23	4317196
48	NT	79.82	26271087	22.8	3467761
49	NT	298.49	97392012	43.81	7145654
50	NT	192.25	76768701	39.06	6249138
51	NT	212.31	100932874	24.68	4572511
52	NT	164.65	69847230	39.91	6529443
53	NT	252.98	92147444	28.85	4299621
54	NT	283.75	97510212	28.17	3718613
55	NT	88.91	30144254	17.96	2618377
56	NT	149.34	56390007	13.89	2651518
57	NT	136.48	57823220	20.83	4066146
58	NT	126.76	50065030	13.84	2178536
59	NT	140.96	51044005	18.86	3138225
60	NT	216.97	58979041	34	4847727
61	NT	248.5	104552673	32.34	6234951
62	TRC40	163.8	36471210	36.42	4254353
63	TRC40	105.13	26692831	18.77	2257184
64	TRC40	146.6	37535610	18.01	2380574
65	TRC40	86.67	18815004	15.27	1781583
66	TRC40	90.3	26894340	14.02	1768170
67	TRC40	116.1	22124348	19.8	2320605
68	TRC40	106.78	23948716	11.65	1326231
69	TRC40	132.76	33675599	13.71	1806366
70	TRC40	105.57	26706670	12.23	1626302
71	TRC40	121.52	36427637	20.07	2760574
72	TRC40	77.76	23034881	24.14	2883554
73	TRC40	73.1	21060229	16.04	2297442
74	TRC40	183.42	37853204	31.94	2953895
75	TRC40	79.28	25793581	24.41	2857896
76	TRC40	118.65	26225082	19.44	2269208
77	TRC40	89.36	21390488	23.38	2951707
78	TRC40	88.96	17847226	19.71	2494336
79	TRC40	144.9	31339881	21.23	2535747
80	TRC40	97.47	25262977	15.05	1997579
81	TRC40	123.58	35046959	28.26	3783421
82	TRC40	167.83	46430268	29.11	3894038
83	TRC40	93.08	26382757	16.57	2112823
84	TRC40	83.76	19234669	26.65	3686046
85	TRC40	240.35	58297094	29.7	3656123
86	TRC40	121.56	28986495	18.63	2016091
87	TRC40	71.53	17844673	20.56	2378311
88	TRC40	69.43	16050305	14.51	1715308
89	TRC40	218.13	52652283	20.69	2159551
90	TRC40	178.67	45004649	26.74	3092914
91	TRC40	147.68	38263885	18.99	2400101
92	TRC40	238.87	58167628	23.07	2907953
93	TRC40	193.95	43572477	14.38	1406735
94	TRC40	123.36	26130383	28.8	3335264
95	TRC40	136.66	25033910	24.81	2128771
96	TRC40	103.11	33440811	17.24	2308514
97	TRC40	201.07	41754347	31.58	2990255
98	TRC40	121.7	48771251	11.74	1616831
99	TRC40	122.77	39250691	22.66	3255073
100	TRC40	137.82	42446802	20.92	2977761
101	TRC40	85.01	19771566	15.05	2188658
102	TRC40	139.03	32422195	42.96	6465404
103	TRC40	182.66	63502479	18.77	2841246
104	TRC40	123.27	27646069	22.53	2832316
105	TRC40	129.76	37554495	16.48	2296231
106	TRC40	286.67	56862107	43.04	4322933
107	TRC40	254.6	59758582	23.47	2386240
108	TRC40	176.08	39542794	18.86	2138818
109	TRC40	218.54	56494875	26.38	3231754
110	TRC40	258.76	79963382	26.47	4060357
111	TRC40	223.42	81117135	22.08	3301391
112	SAE1	87.39	18382171	12.27	1392668
113	SAE1	107.19	18950376	27.68	3470285
114	SAE1	158.2	44554341	26.56	4098758
115	SAE1	150.63	37193835	26.11	3557833
116	SAE1	145.26	37678211	37.04	6032998
117	SAE1	95	21899068	21.28	3086978
118	SAE1	96.62	25885930	17.96	2680639
119	SAE1	102.71	19884002	16.12	1887928
120	SAE1	82.28	16849539	15.45	2178827
121	SAE1	196.55	36452106	31.58	3244860
122	SAE1	83.94	13297201	28.44	2855191
123	SAE1	140.69	25668529	22.31	2626055
124	SAE1	155.34	32000163	23.2	2277479
125	SAE1	365.54	67293672	42.01	4492894
126	SAE1	97.87	15942016	27.77	2552724
127	SAE1	108.62	25127861	31.17	4000756
128	SAE1	78.92	17484176	19.93	2139433
129	SAE1	328.73	56434478	50.08	5059706
130	SAE1	98.54	21713238	11.87	1343272
131	SAE1	94.38	21191123	21.5	2421868
132	SAE1	107.05	15501554	19.35	1786213
133	SAE1	191.22	37753840	38.16	4528333
134	SAE1	166.31	36444915	21.72	2803558
135	SAE1	192.07	33573070	19.8	1911661
136	SAE1	186.51	47866134	18.23	2120909
137	SAE1	120.85	24563573	21.01	2368133
138	SAE1	100.11	23113243	29.88	3662287
139	SAE1	120.27	20662522	14.47	1285554
140	SAE1	178.85	35036364	29.65	3772699
141	SAE1	97.91	16584757	24.55	2444435
142	SAE1	79.77	21907501	12	1707231
143	SAE1	135.58	19545743	28.98	2736830
144	SAE1	81.34	16979690	27.1	3269377
145	SAE1	139.48	31536520	31.09	3631404
146	SAE1	91.82	12838298	20.07	1877464
147	SAE1	140.51	36558199	14.51	2297979
148	SAE1	86.36	23815287	16.84	2424076
149	SAE1	251.95	52536707	24.9	2909317
150	SAE1	193.05	45050224	16.98	2091794
151	SAE1	84.03	19214919	16.98	2015055
152	SAE1	180.33	35835444	30.55	3334854
153	SAE1	153.32	34121608	16.89	1976392
154	SAE1	136.21	33719481	50.44	6381124
155	SAE1	128.19	21501253	39.28	4141572
156	SAE1	128.15	34529812	16.35	2114605
157	SAE1	172.27	39712201	22.35	2711005
158	SAE1	115.02	29177291	11.38	1556920
159	SAE1	162.15	31000813	15.09	1595117
160	SAE1	266.33	63473511	14.29	1645328
161	SAE1	173.48	39149603	31.98	3920948
162	SAE1	257.01	59987361	21.14	2422705
163	SAE1	170.79	28356338	24.55	2335562
164	SAE1	221.32	42757114	30.64	3251861
