# Supplementary material for: An engineered transcriptional reporter of protein localization identifies regulators of mitochondrial and ER membrane protein trafficking in high-throughput CRISPRi screens
Source: eLife. 2021 Aug 20;10:e69142. doi: 10.7554/eLife.69142 (PMC8423448; doi:10.7554/eLife.69142)
Supplement: Figure 5—source data 1. [file elife-69142-fig5-data1.xlsx]

## Sheet: Fig 5B
Number	Protein	Bio rep	sgRNA	Value
1	GAPDH	1	NT	68300
2	SAE1	1	NT	21500
3	COX4	1	NT	47300
4	VDAC1	1	NT	6080
5	AKAP1	1	NT	5410
6	MAVS	1	NT	6260
7	SYNJ2BP	1	NT	9410
8	FIS1	1	NT	10500
9	GAPDH	1	SAE1	61100
10	SAE1	1	SAE1	4610
11	COX4	1	SAE1	29200
12	VDAC1	1	SAE1	4770
13	AKAP1	1	SAE1	3640
14	MAVS	1	SAE1	3250
15	SYNJ2BP	1	SAE1	4250
16	FIS1	1	SAE1	2260
17	GAPDH	2	NT	66700
18	SAE1	2	NT	8670
19	COX4	2	NT	47200
20	VDAC1	2	NT	5700
21	AKAP1	2	NT	7710
22	MAVS	2	NT	6600
23	SYNJ2BP	2	NT	7790
24	FIS1	2	NT	9790
25	GAPDH	2	SAE1	56000
26	SAE1	2	SAE1	1870
27	COX4	2	SAE1	35800
28	VDAC1	2	SAE1	5550
29	AKAP1	2	SAE1	7400
30	MAVS	2	SAE1	3690
31	SYNJ2BP	2	SAE1	6650
32	FIS1	2	SAE1	3320
33	GAPDH	3	NT	63300
34	SAE1	3	NT	7810
35	COX4	3	NT	42400
36	VDAC1	3	NT	3050
37	AKAP1	3	NT	9190
38	MAVS	3	NT	3330
39	SYNJ2BP	3	NT	5860
40	FIS1	3	NT	4400
41	GAPDH	3	SAE1	54200
42	SAE1	3	SAE1	656
43	COX4	3	SAE1	33600
44	VDAC1	3	SAE1	3330
45	AKAP1	3	SAE1	5750
46	MAVS	3	SAE1	2160
47	SYNJ2BP	3	SAE1	3530
48	FIS1	3	SAE1	2530
