# Supplementary material for: An engineered transcriptional reporter of protein localization identifies regulators of mitochondrial and ER membrane protein trafficking in high-throughput CRISPRi screens
Source: eLife. 2021 Aug 20;10:e69142. doi: 10.7554/eLife.69142 (PMC8423448; doi:10.7554/eLife.69142)
Supplement: Figure 6—source data 1. [file elife-69142-fig6-data1.xlsx]

## Sheet: Fig 6D
Experiment	sgRNA	Golgi_Area	G_mTA-Intensity	Mito_Area	M_mTA-Intensity
8_4	NT #1	14.8	4675.8	94.3	4072.2
8_4	NT #1	17	1706.2	80	2879.8
8_4	NT #1	21.6	1710.4	82.1	1860.2
8_4	NT #1	26.5	2482.7	106.2	2618.4
8_4	NT #1	35.6	2330.8	139.3	2424.6
8_4	NT #1	25.8	3122.1	64.4	2350.7
8_4	NT #1	20.9	2573.1	115.1	2493.5
8_4	NT #1	20.2	1670.7	117.8	1376.7
8_4	NT #1	20.5	3413.6	162	2576.3
8_4	NT #1	36.7	4753.3	96.6	4082.8
8_4	NT #1	21.1	2543.7	181.5	2305.9
8_4	NT #1	29.6	2707.2	163.3	2235.3
8_4	NT #1	19.2	3784.8	140	3272.6
8_4	NT #1	25.4	2575.8	121.4	2152.5
8_4	NT #1	34.9	3090.2	218.3	1891.8
8_4	NT #1	24.7	1573	172.1	1468.3
8_4	NT #1	26.9	1978.8	155.9	2406.7
8_4	NT #1	26.2	3120.2	162.9	2150.3
8_4	NT #1	19.1	3404.6	191.1	2617
8_4	NT #1	51.1	4589.5	188.1	3769.7
8_4	NT #1	30.6	3832.2	131.2	3333.4
8_4	NT #1	27.5	3443.3	182.3	3025.6
8_4	NT #1	21	1916.1	100	1688.3
8_4	NT #1	10.1	3164.6	115.9	2755.1
8_4	NT #1	30.2	3412.4	133.4	2705.2
8_4	NT #1	30.4	4182.4	217.2	3842.1
8_4	NT #1	18.2	4708.4	225.6	4056.4
8_4	NT #1	18.4	3232.5	136.1	2945
8_4	NT #1	28.3	3304.1	153	2386.8
8_4	NT #1	20.1	2439.9	59	2413.6
8_4	NT #1	17.1	1648.9	77.1	1450.3
8_4	NT #1	12.8	4936.7	144.5	3332.3
8_4	NT #1	37.7	2046.9	247.4	1776.1
8_4	NT #1	19.3	4824.3	178.7	3856
8_4	NT #1	17.8	4472.9	271.3	3995
8_4	NT #1	15.1	2841.9	110.7	2100.7
8_4	NT #1	22.4	2528.3	83.2	2540.8
8_4	NT #1	8.8	6007.4	86.5	4430.1
8_4	NT #1	34.7	4007.1	177.2	2868.6
8_4	NT #1	28.6	2396.3	107.3	2705.9
8_4	NT #1	24.9	3953.2	143.9	3240.9
8_4	NT #1	18.1	3286.6	139.7	2522
8_4	NT #1	18.7	2693.5	108.7	1536.8
8_4	NT #1	14.1	3857.7	121.4	1953.6
8_4	NT #1	33.4	3926.4	168.4	3571.2
8_4	NT #2	19.73	4004.31	84.46	2936.56
8_4	NT #2	19.84	3266.83	160.57	2541.47
8_4	NT #2	19.57	5536.51	168.78	4720.77
8_4	NT #2	16.36	6618.41	144.69	6349.37
8_4	NT #2	18.86	2056.66	150.95	2000.77
8_4	NT #2	32.71	1238.75	176.52	1286.27
8_4	NT #2	29.64	3799.11	101.67	3253.26
8_4	NT #2	16.16	3340.34	164.66	2533.2
8_4	NT #2	12.84	2199.81	152.04	1954.55
8_4	NT #2	22.45	4967.06	130.42	3633.45
8_4	NT #2	27.61	3931.58	274.38	2575.58
8_4	NT #2	24.04	2836.06	173.67	2315.49
8_4	NT #2	23.5	4870.61	102.54	3352.22
8_4	NT #2	12.53	3725.59	103.29	3125.53
8_4	NT #2	18.79	3567.62	63.8	3193.21
8_4	NT #2	11.5	2709.03	152	2293.41
8_4	NT #2	42.15	3610.38	190.92	3067.92
8_4	NT #2	13.83	1895.06	72.28	1827
8_4	NT #2	21.3	3061.01	99.72	2633.21
8_4	NT #2	22.38	2735.35	178.06	2595.84
8_4	NT #2	13.16	2775.57	124.11	2308.76
8_4	NT #2	37.9	1862.69	181.99	1746.39
8_4	NT #2	13.17	2472.85	63.36	2498.63
8_4	NT #2	20.02	3195.62	126.99	2892.72
8_4	NT #2	15.24	2828.97	112.98	2698.44
8_4	NT #2	25.26	3897.13	115.59	3042.15
8_4	NT #2	17.24	4756.39	124.5	3337.72
8_4	NT #2	18.31	3750.09	114.92	2699.22
8_4	NT #2	16.52	4017.11	111.75	2821.3
8_4	NT #2	25.72	4855.07	106.4	4607.61
8_4	NT #2	10.97	5296.27	101.51	4750.52
8_4	NT #2	20.89	1713.33	183.4	1480.95
8_4	NT #2	10.6	2206.21	119.95	2163.11
8_4	NT #2	17.19	3007.48	100.37	2804.1
8_4	NT #2	22.6	3527.57	131.08	3123.34
8_4	NT #2	28.11	2025.3	231.88	1989.44
8_4	NT #2	9.14	3745.04	121.37	3555.87
8_4	NT #2	16.27	2353.01	153.01	1702.5
8_4	NT #2	16.98	3209.55	139.7	2588.97
8_4	NT #2	19.34	2226.41	188.41	1814.41
8_4	NT #2	20.09	3511.36	161.35	2822.67
8_4	NT #2	10.65	2807.36	103.91	1953.09
8_4	NT #2	19.64	2150.45	146.15	1812.63
8_4	NT #2	10.03	2749.93	113.92	2993.87
8_4	EMC4	18.6	1107.29	179.61	1363.01
8_4	EMC4	18.26	2090.63	110.72	2109.66
8_4	EMC4	16.55	2188.77	240.3	2354.62
8_4	EMC4	6.19	2259.92	181.92	2808.66
8_4	EMC4	10.06	1830.45	164.84	2319.65
8_4	EMC4	16.85	3373.24	101.28	4104.24
8_4	EMC4	9.07	2808.66	104.2	4106.47
8_4	EMC4	13.03	5565.62	198.29	5649.66
8_4	EMC4	30.22	2498.01	103.93	3274.27
8_4	EMC4	21.74	3741.47	150.49	3781.06
8_4	EMC4	14.44	1510.29	158.83	1780.85
8_4	EMC4	2.61	1413.23	116.02	1749.2
8_4	EMC4	9.44	1208.56	161.62	1648.01
8_4	EMC4	20.37	4592.09	122.99	5213.88
8_4	EMC4	14.33	5453.4	139.27	7589.69
8_4	EMC4	12.8	1795.63	177.46	2017.16
8_4	EMC4	24.14	2243.41	153.46	2775.94
8_4	EMC4	10.54	1807.78	129.64	4103.38
8_4	EMC4	25.9	3476.54	142.79	4173.11
8_4	EMC4	13.26	2025.79	167.31	2174.94
8_4	EMC4	11.91	4427.44	109.24	4602.97
8_4	EMC4	21.16	2906.45	163.34	4140.89
8_4	EMC4	30.74	6530.06	220.57	8454.85
8_4	EMC4	16.07	4370.07	124.6	5813.65
8_4	EMC4	21.74	1302.22	147.64	1502.63
8_4	EMC4	18.6	2365.2	119.36	3635.57
8_4	EMC4	5.8	2108.93	217.85	4041.86
8_4	EMC4	21.76	2667.78	124.69	3636.13
8_4	EMC4	50.28	2494.84	386.99	3016.97
8_4	EMC4	16.12	2110.9	107.8	2637.63
8_4	EMC4	13.08	4737.24	92.07	5940.88
8_4	EMC4	20.3	4686.33	148.27	5832.48
8_4	EMC4	28.41	5834.97	149.28	7191.72
8_4	EMC4	8.23	4350.6	137.83	4399.96
8_4	EMC4	7.96	3344.78	164.3	4122.3
8_4	EMC4	19.38	3481.4	60.21	5702.05
8_4	EMC4	16.05	1984.77	134.77	2476.76
8_4	EMC4	8.96	1504.3	69.08	2544.96
8_4	EMC4	19.18	1150.99	122.88	1282.47
8_4	EMC4	2.4	6233.08	99.41	8512.7
8_4	EMC4	45.24	1487.82	219.18	1496.53
8_4	EMC4	11.09	5288.08	142.1	7421.25
8_4	EMC4	14.56	3593.83	134.15	5162.69
8_4	EMC4	22.61	3648.99	194.92	3737.32
8_4	EMC4	26.67	3465.75	141.65	4383.6
8_4	EMC4	6.95	1854.12	333.39	1715.23
8_4	EMC4	14.61	1837.29	159.82	1947.72
8_4	EMC4	9.9	2513.27	186.44	2673.71
8_4	EMC4	34.49	3195.09	164.3	3746.99
8_4	EMC4	17.44	2674.73	165.4	2606.2
8_4	EMC8	22.81	2239.69	222.56	2434.43
8_4	EMC8	27.18	1944.28	172.71	1660.2
8_4	EMC8	9.92	4759.46	184.91	4401.76
8_4	EMC8	18.84	2186.83	114.84	2217.02
8_4	EMC8	17.12	1985.75	84.8	1869.6
8_4	EMC8	15.52	2489.22	134.99	1968.62
8_4	EMC8	13.8	3308.65	64.36	3213.32
8_4	EMC8	23.56	3239.02	100.12	2949.03
8_4	EMC8	31.77	3483.19	106.29	3043.14
8_4	EMC8	35.61	1966.13	198.12	1730.66
8_4	EMC8	43.25	3216.24	211.5	2579.56
8_4	EMC8	27.22	2287.9	106.06	2196.47
8_4	EMC8	4.48	3195.6	124	3566.96
8_4	EMC8	17.55	3440.36	99.2	3152.9
8_4	EMC8	17.12	3002.08	143.04	2561.03
8_4	EMC8	21.76	4196.74	80.46	4160.79
8_4	EMC8	13.05	4767.15	126.04	4434.38
8_4	EMC8	24.16	2612.72	144.36	2142.15
8_4	EMC8	27.29	2833.78	216.16	2789.7
8_4	EMC8	40.37	1837.69	146.9	1446.56
8_4	EMC8	12.69	2385.9	139.52	2019.23
8_4	EMC8	13.94	1828.2	159.27	1490.78
8_4	EMC8	15.5	3783.41	107.5	3925.51
8_4	EMC8	13.6	2115.96	126.7	2129.31
8_4	EMC8	18.28	3347.71	152.57	3223.84
8_4	EMC8	6.4	2926.53	139.48	3074.58
8_4	EMC8	51.27	2672.79	303.98	2832.57
8_4	EMC8	23.18	4488.89	195.22	3694.16
8_4	EMC8	18.45	4219.79	116.32	3822.29
8_4	EMC8	15.93	3736.3	95.15	3454.41
8_4	EMC8	12.78	2954.28	167.29	2472.85
8_4	EMC8	19.82	3271.73	130.03	3538.73
8_4	EMC8	21.78	2013.61	133.07	2013.26
8_4	EMC8	24.85	2372.84	146.24	1911.37
8_4	EMC8	9.9	1668.13	130.65	1905.05
8_4	EMC8	37	4691.52	234.52	4908.43
8_4	EMC8	29.32	2563.46	129.65	2129.88
8_4	EMC8	20.39	2894.28	134.51	3462.52
8_4	EMC8	20.12	2706.84	158.22	2524.01
8_4	EMC8	15.36	2428.44	148.68	2347.29
8_4	EMC10 #1	17	3081.27	115.2	2594.48
8_4	EMC10 #1	18.08	1868.53	109.9	1470.44
8_4	EMC10 #1	28.73	2824.34	190.74	2067.57
8_4	EMC10 #1	17.4	3211.44	150.54	2050.42
8_4	EMC10 #1	17.69	2414.26	129.69	1850.63
8_4	EMC10 #1	10.63	2731.73	129.96	2229.75
8_4	EMC10 #1	8.68	3063.86	85.21	2555.11
8_4	EMC10 #1	31.24	4195.84	282.29	2593.22
8_4	EMC10 #1	29.23	2717.53	284.52	1821.84
8_4	EMC10 #1	30.51	1719.68	171.77	1316.58
8_4	EMC10 #1	19.36	1116.15	89.55	1066.08
8_4	EMC10 #1	18.29	2265.07	111.56	1613.94
8_4	EMC10 #1	7.64	3598.4	84.05	2403.67
8_4	EMC10 #1	28.8	1822.52	90.99	1601.72
8_4	EMC10 #1	15.04	2373.78	72.69	1769.19
8_4	EMC10 #1	13.51	2907.94	100.37	1838.04
8_4	EMC10 #1	16.27	2983.31	168.76	2222.93
8_4	EMC10 #1	21.19	2830.52	195.66	1983.13
8_4	EMC10 #1	37.55	1177.26	165.97	1004.47
8_4	EMC10 #1	35.54	1509.69	176.52	1178.53
8_4	EMC10 #1	31.09	2791.51	142.54	1989.4
8_4	EMC10 #1	23.32	3640.42	107.61	2382.64
8_4	EMC10 #1	26.29	2152.67	94.74	1919.61
8_4	EMC10 #1	24.44	2067.96	97.87	2300.09
8_4	EMC10 #1	24.46	2291.25	133.51	1928.88
8_4	EMC10 #1	6.67	1668.03	90.65	1800.65
8_4	EMC10 #1	26.56	3510.9	147.11	2419.74
8_4	EMC10 #1	11.38	1509.05	135.59	1200.95
8_4	EMC10 #1	19.96	2262.03	115.31	1479.08
8_4	EMC10 #1	21.83	2333.89	124.69	1702.04
8_4	EMC10 #1	16.12	2690.06	132.8	2775.93
8_4	EMC10 #1	30.79	3594.61	148.14	2730.47
8_4	EMC10 #1	19.25	1979.02	166.79	1526.46
8_4	EMC10 #1	16.28	2313.25	151.95	1478.17
8_4	EMC10 #1	16.34	2310.61	72.28	1879.62
8_4	EMC10 #1	26.81	3550.65	109.99	2611.53
8_4	EMC10 #1	32.28	3683.79	121.05	2934.19
8_4	EMC10 #1	40.23	2652.77	170.77	1980.84
8_4	EMC10 #1	11.36	3116.18	36.21	2334.55
8_4	EMC10 #1	32.59	3572.08	152.55	2882.34
8_4	EMC10 #1	13.24	2857.14	144.41	2605.49
8_4	EMC10 #1	21.08	1202.82	100.84	1212.45
8_4	EMC10 #1	19.95	3176.35	103.95	2219.8
8_4	EMC10 #1	27.13	1453.24	112.68	1097.36
8_4	EMC10 #1	17.32	3264.03	168.89	1980.12
8_4	EMC10 #1	30.56	2290.7	142.86	1744.57
8_4	EMC10 #1	15.95	3807.45	134.19	2868.58
8_4	EMC10 #1	30.42	2166.43	167.56	1825.24
8_4	EMC10 #1	14.22	2969.59	108.43	2840.79
8_4	EMC10 #1	20.98	1735.56	127.02	1260.62
8_4	EMC10 #1	17.71	2394.41	100.32	1986.94
8_4	EMC10 #1	11.63	4706.45	73.55	3498.08
8_4	EMC10 #2	41.49	1419.63	265.12	1036.37
8_4	EMC10 #2	17.51	3547.26	190.08	2001.1
8_4	EMC10 #2	18.52	2586.68	124.21	1962.19
8_4	EMC10 #2	19.27	3131.08	210.44	2299.63
8_4	EMC10 #2	54.17	2919.56	482.51	2135.27
8_4	EMC10 #2	22.92	3156.24	186.81	2211.31
8_4	EMC10 #2	16.78	4374.71	142.03	3319.05
8_4	EMC10 #2	25.3	1496.96	208.76	1169.03
8_4	EMC10 #2	23.06	1634.38	160.6	1485.52
8_4	EMC10 #2	11.63	2774.48	118.9	1882.02
8_4	EMC10 #2	25.1	2908.89	195.25	2529.76
8_4	EMC10 #2	20.8	3396.46	122.03	3074.32
8_4	EMC10 #2	33.21	3726.17	131.73	2285.08
8_4	EMC10 #2	20.76	4161.51	184.69	2250.37
8_4	EMC10 #2	12.25	2063.66	89.21	1854.57
8_4	EMC10 #2	13.56	2399.92	109.23	1786.63
8_4	EMC10 #2	16.94	1841.43	100.32	1170
8_4	EMC10 #2	18.7	2494.4	80.85	2183.53
8_4	EMC10 #2	13.64	3345.77	115.8	2845.72
8_4	EMC10 #2	9.94	3496.8	96.28	2309.59
8_4	EMC10 #2	27.06	1863.31	168.14	1399.08
8_4	EMC10 #2	5.37	2023.85	92.55	1718.25
8_4	EMC10 #2	14.84	2887.09	83.91	2374.23
8_4	EMC10 #2	11.77	2695.81	86.68	2421.47
8_4	EMC10 #2	18.63	4616.28	102.35	3500.1
8_4	EMC10 #2	2.33	3297.15	74.65	2282.85
8_4	EMC10 #2	30.72	2100.94	109.24	2417.28
8_4	EMC10 #2	24.94	2438.23	142.29	1967.22
8_4	EMC10 #2	16.05	1916.61	135.73	1303.49
8_4	EMC10 #2	37.16	1715.75	202.45	1302.16
8_4	EMC10 #2	4.05	1777.3	58.74	1460.87
8_4	EMC10 #2	15.56	2898.86	170.58	2152.03
8_4	EMC10 #2	13.12	6046.44	123.38	4119.14
8_4	EMC10 #2	14.2	3251.83	137.51	2921.14
8_4	EMC10 #2	12.44	3631.14	111.22	2630.55
8_4	EMC10 #2	38.38	2383.96	154.72	1756.77
8_4	EMC10 #2	4.92	2253.66	78.4	1576.74
8_4	EMC10 #2	21.1	4607.76	126.42	3085.92
8_4	EMC10 #2	15.64	5234.27	101.96	3613.56
8_4	EMC10 #2	23.8	4198.44	106.54	3544.8
8_4	EMC10 #2	19.4	4740.79	101.85	3147.43
8_4	EMC10 #2	22.03	4798.16	146.38	4046.15
8_4	EMC10 #2	17.67	4543.84	128.43	3417.23
8_4	EMC10 #2	7.41	4367.6	84.52	3906.35
8_4	EMC10 #2	16.87	3332.18	101.83	2321.05
8_4	EMC10 #2	17.64	3743.91	135.5	2624.99
8_4	EMC10 #2	21.88	3309.36	141.16	2486.81
8_4	EMC10 #2	22.56	3901.99	149.28	2560.2
8_4	EMC10 #2	19.34	3285.1	197.97	2191.86
