# Supplementary material for: An engineered transcriptional reporter of protein localization identifies regulators of mitochondrial and ER membrane protein trafficking in high-throughput CRISPRi screens
Source: eLife. 2021 Aug 20;10:e69142. doi: 10.7554/eLife.69142 (PMC8423448; doi:10.7554/eLife.69142)
Supplement: Figure 6—source data 2. [file elife-69142-fig6-data2.xlsx]

## Sheet: Fig 6F
Number	Guide	Bio Rep	Protein	Protein Level	GAPDH Level
1	NT	1	EMC4	1050	12000
2	EMC4	1	EMC4	216	12800
3	EMC10	1	EMC4	1310	8300
4	NT	2	EMC4	1550	9390
5	EMC4	2	EMC4	393	15400
6	EMC10	2	EMC4	1580	9650
7	NT	3	EMC4	1250	6800
8	EMC4	3	EMC4	335	9660
9	EMC10	3	EMC4	1110	11200
10	NT	1	EMC10	338	15400
11	EMC4	1	EMC10	282	13200
12	EMC10	1	EMC10	2.48	11900
13	NT	2	EMC10	211	10400
14	EMC4	2	EMC10	241	12500
15	EMC10	2	EMC10	2.4	8560
16	NT	3	EMC10	259	9610
17	EMC4	3	EMC10	316	14100
18	EMC10	3	EMC10	0.908	12800
19	NT	1	CalR	1190000	317000
20	EMC4	1	CalR	1520000	420000
21	EMC10	1	CalR	1680000	451000
22	NT	2	CalR	1370000	308000
23	EMC4	2	CalR	1590000	332000
24	EMC10	2	CalR	1410000	356000
25	NT	3	CalR	1420000	364000
26	EMC4	3	CalR	1610000	388000
27	EMC10	3	CalR	1090000	353000
28	NT	1	VTI1B	348000	2760000
29	EMC4	1	VTI1B	381000	3060000
30	EMC10	1	VTI1B	410000	2420000
31	NT	2	VTI1B	304000	2150000
32	EMC4	2	VTI1B	459000	2500000
33	EMC10	2	VTI1B	297000	2380000
34	NT	3	VTI1B	309000	2080000
35	EMC4	3	VTI1B	354000	2360000
36	EMC10	3	VTI1B	286000	2340000
37	NT	1	SQS	291000	2060000
38	EMC4	1	SQS	212000	2500000
39	EMC10	1	SQS	397000	2210000
40	NT	2	SQS	314000	1780000
41	EMC4	2	SQS	203000	1660000
42	EMC10	2	SQS	360000	1600000
43	NT	3	SQS	247000	1210000
44	EMC4	3	SQS	194000	1480000
45	EMC10	3	SQS	326000	1320000
