# Supplementary material for: An engineered transcriptional reporter of protein localization identifies regulators of mitochondrial and ER membrane protein trafficking in high-throughput CRISPRi screens
Source: eLife journal article supplement (doi:10.7554/elife.69142), 2021-08-20

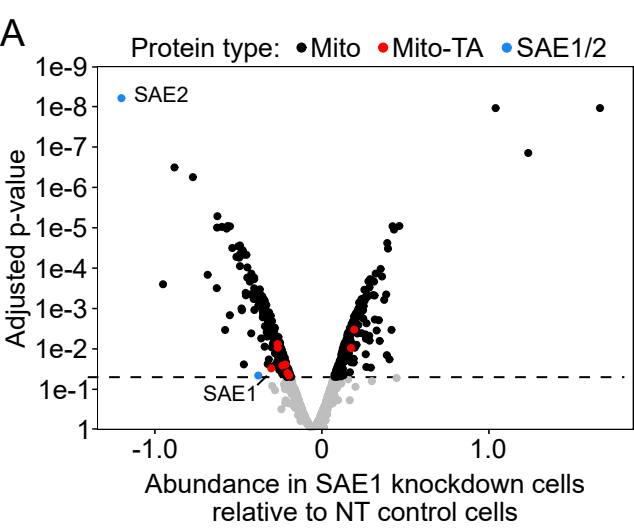

TA protein hits

|              |            |
|--------------|------------|
| <u>Down:</u> | <u>Up:</u> |
| BAX          | BCL2L1     |
| MFF          | MCL1       |
| FKBP8-1      |            |
| GDAP1        |            |
| FKBP8-2      |            |
| BCL2L2       |            |
| RHOT1        |            |

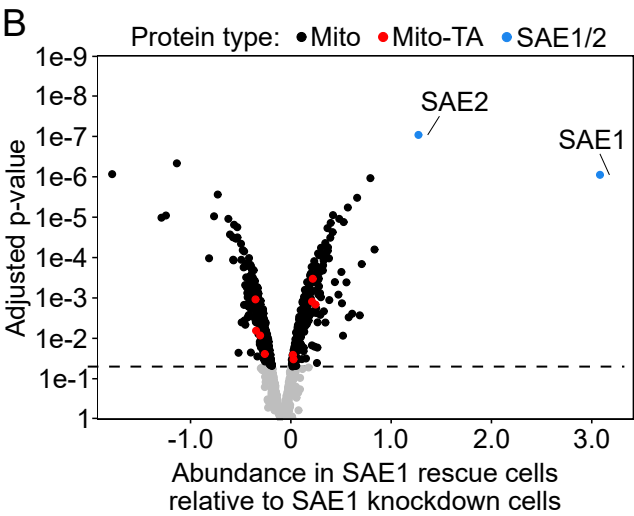

TA protein hits

|              |            |
|--------------|------------|
| <u>Down:</u> | <u>Up:</u> |
| BCL2L1       | MFF        |
| BAK1         | GDAP1      |
| BAD          | FIS1       |
| MCL1         | RHOT1      |
|              | FKBP8-1    |

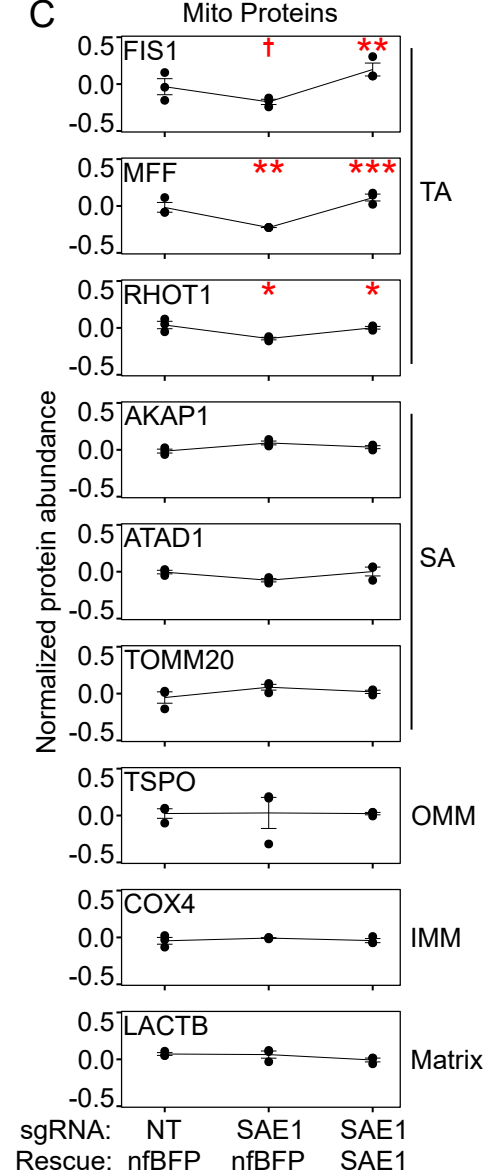

Supplement: supp [file elife_poa_e69142_Figure_5_figure_supplement_4.pdf › elife_poa_e69142_Figure_5_figure_supplement_4.pdf]
