# Supplementary material for: An engineered transcriptional reporter of protein localization identifies regulators of mitochondrial and ER membrane protein trafficking in high-throughput CRISPRi screens
Source: eLife. 2021 Aug 20;10:e69142. doi: 10.7554/eLife.69142 (PMC8423448; doi:10.7554/eLife.69142)
Supplement: Supplementary file 1. — Plasmids_Used: plasmid table for this study. sgRNAs_Used: sgRNA sequences used for individual sgRNA sequences. [file elife-69142-supp1.xlsx]

## Sheet: Plasmids_Used
Name	Insert	Description	Vector	Promoter(s)	Access
UAS:mCherry	UAS:mCherry	mCherry reporter construct	Lentivirus	UAS:mCherry; PGK:Blasticidin-S deaminase	Addgene 170994
AKAP1-hLOV-TEVcs-GAL4bd-VP64-V5	AKAP1(tmd)-NNES-hLOV-TEVcs(ENLYFQ/M)-GAL4bd-VP64-V5	Mitochondrial HiLITR-TF	pLX208 Lentivirus	Ef1α:TF; PGK:Hygromycin phosphotransferase	Addgene 170995
TMED3-hLOV-TEVcs-GAL4bd-VP64-V5	TMED3(FL)-NNES-hLOV-TEVcs(ENLYFQ/M)-GAL4bd-VP64-V5	ER/Golgi HiLITR-TF	pLX208 Lentivirus	Ef1α:TF; PGK:Hygromycin phosphotransferase	Addgene 170996
PMP34-hLOV-TEVcs-GAL4bd-VP64-V5	PMP34(FL)-NNES-hLOV-TEVcs(ENLYFQ-M)-GAL4bd-VP64-V5	Peroxisome HiLITR-TF (promiscuous localization)	pLX208 Lentivirus	Ef1α:TF; PGK:Hygromycin phosphotransferase	Addgene 170997
EGFP-uTEV1-MAVS	EGFP-uTEV1-MAVS(tmd)	Mitochondrial "TA protease"	Tet-On Lentivirus	pTRE-tight:Protease; PGK:rtTA3	Addgene 170998
EGFP-uTEV1-MAVS-mTA	EGFP-uTEV1-MAVS(tmd)[R537A]	Mitochondrial mutant 1 "mTA* protease", single charge nullification	Tet-On Lentivirus	pTRE-tight:Protease; PGK:rtTA3	Addgene 170999
EGFP-uTEV1-MAVS-mTA2	EGFP-uTEV1-MAVS(tmd)[R537A, R538A]	Mitochondrial mutant 2 protease, double charge nullification	Tet-On Lentivirus	pTRE-tight:Protease; PGK:rtTA3	Addgene 171000
EGFP-uTEV1-MAVS-mTA3	EGFP-uTEV1-MAVS(tmd)[Y536delinsFIV]	Mitochondrial mutant 3 protease, hydrophobic TMD extension	Tet-On Lentivirus	pTRE-tight:Protease; PGK:rtTA3	Addgene 171001
EGFP-uTEV1-MAVS-mTA4	EGFP-uTEV1-MAVS(tmd)[Y536delinsFIVLI]	Mitochondrial mutant 4 protease, longer hydrophobic TMD extension	Tet-On Lentivirus	pTRE-tight:Protease; PGK:rtTA3	Addgene 171002
EGFP-uTEV1-MAVS-mTA5	EGFP-uTEV1-MAVS(tmd)[Y536delinsFIVLI, R537A]	Mitochondrial mutant 5 protease, longer hydrophobic TMD extension with single charge nullification	Tet-On Lentivirus	pTRE-tight:Protease; PGK:rtTA3	Addgene 171003
EGFP-uTEV1-MAVS-mTA6	EGFP-uTEV1-MAVS(tmd)[Y536delinsFIVLI, R537A, R538A]	Mitochondrial mutant 6 protease, longer hydrophobic TMD extension with double charge nullification	Tet-On Lentivirus	pTRE-tight:Protease; PGK:rtTA3	Addgene 171004
AKAP1-EGFP-uTEV1	AKAP1(tmd)-EGFP-uTEV1	Mitochondrial "SA protease"	Tet-On Lentivirus	pTRE-tight:Protease; PGK:rtTA3	Addgene 171005
EGFP-uTEV1-NES	EGFP-uTEV1-NES	Cytosolic protease	Tet-On Lentivirus	pTRE-tight:Protease; PGK:rtTA3	Addgene 171006
EGFP-uTEV1-CB5	EGFP-uTEV1-CB5(tmd)	Endoplasmic reticulum tail-anchored protease	Tet-On Lentivirus	pTRE-tight:Protease; PGK:rtTA3	Addgene 171007
EGFP-uTEV1-ACBD5	EGFP-uTEV1-ACBD5(tmd)	Peroxisomal tail-anchored protease	Tet-On Lentivirus	pTRE-tight:Protease; PGK:rtTA3	Addgene 171008
EGFP-uTEV1-SQStmd	EGFP-uTEV1-SQS(tmd)	ER-membrane EMC-client protease	Tet-On Lentivirus	pTRE-tight:Protease; PGK:rtTA3	Addgene 171009
EGFP-uTEV1-SQSfl	EGFP-uTEV1-SQS(FL)	ER-membrane EMC-client protease (full-length)	Tet-On Lentivirus	pTRE-tight:Protease; PGK:rtTA3	Addgene 171010
pMH0001	dCas9-HA-NLS-BFP-KRAB	dCas9[D10A, H840A]-KRAB for CRISPRi (human codon-optimized)	pHR Lentivirus	SFFV:dCas9-HA-NLS-BFP-KRAB	RRID: Addgene_85969
pMCB619	U6:sgRNA_Puro-T2A-BFP	sgRNA vector for libraries and single-guide validation	Lentivirus	mU6:sgRNA; Ef1α:Puromycin acetyltransferase-T2A-BFP	Addgene 171011
pLX208-SAE1	untagged SAE1	Untagged full-length SAE1	pLX208 Lentivirus	Ef1α:SAE1; PGK:Neomycin phosphotransferase	Addgene 171012
pLX208-nfBFP	untagged nfBFP	Untagged, nonfluorescent BFP[H66A]	pLX208 Lentivirus	Ef1α:nfBFP; PGK:Neomycin phosphotransferase	Addgene 171013

## Sheet: sgRNAs_Used
Name	Guide identity	Guide sequence
Nontargeting #1	non-targeting_00839	GGGCGCGAGGTACGTACGTG
Nontargeting #2	non-targeting_00838	GGGAACCCTTCTAACCCCCT
VPS13D	VPS13D_193181	GCCGCGGGCCTGCGCCATTG
TTC1	TTC1_187411	GAGGTTGTGAGTAACCCCGT
TRC40	ASNA1_11975	GGCTCCAGCGGCTCCACATC
SGTA	SGTA_158011	GCGCCTGAGAGGTGAGTGAG
TRC35	GET4_68262	GCGGAGCGCCGGCCCGATGG
WRB	WRB_195521	GATCCCCACCGGCCCTTGGG
CAMLG	CAMLG_25801	GATGTTGGCCGCCGCTGCGA
SAE1 #1	SAE1_153474	GCGCGGTTAGGGGATAAGAG
SAE1 #2	SAE1_153475	GGGTGGCGCGCGGGTCCGGC
SAE1 #3	SAE1_153471	GCGGTTGGCTTGAGCGGGAC
SAE1 #4	SAE1_153473	GGGAGGCGGCACAGTATGAC
CCNK #1	CCNK_29451	GGCAAGGAGAGACGTCGCTG
CCNK #2	CCNK_29454	GTATACAAGATGGCCGCAGT
SKA1 #1	SKA1_159483	GCTCCGTTGGAAGCCCAGGA
SKA1 #2	SKA1_159484	GCCTGCGCTGCGCTAGGGCG
PTPN1 #1	PTPN1_14801	GAAGGGCCCGCCACGCTCCG
PTPN1 #2	PTPN1_14803	GGAAGCAGCAGCGGCTAGGG
REEP4 #1	REEP4_146654	GCCACCAGCACCGGCCTACA
REEP4 #2	REEP4_146653	GCCAGCACCGGCCTACAGGG
ATP6V1A	ATP6V1A_13412	GCAGCCTCTGGGTCCTCGGT
SEC61A1	SEC61A1_155674	GCACGTCAGTGCTAGCCCGG
CYB5B	CYB5B_43132	GATCTCAGTTAGCGGTGGAG
EMC4	EMC4_53975	GGAGACAAAGCGGAGAACGC
EMC8	EMC8_54003	GAGGAGCCGAGGCCCAAACG
EMC10 #1	EMC10_53932	GTGGTGGGAAGAAGCCGAGA
EMC10 #2	EMC10_53931	GTGGGAAGAAGCCGAGATGG
Example plasmid	Sequence	Color-codes
Nontargeting #1	gatccgacgcgccatctctaggcccgcgccggccccctcgcacggacttgtgggagaagctcggctactcccctgccccggttaatttgcatataatatttcctagtaactatagaggcttaatgtgcgataaaagacagataatctgttctttttaatactagctacattttacatgataggcttggatttctataacttcgtatagcatacattatacgaagttataaacagcacaaaaggaaactcaccctaactgtaaagtaattgtgtgttttgagactataagtatcccttggagaaccaccttgttgGGGCGCGAGGTACGTACGTGgtttaagagctaagctggaaacagcatagcaagtttaaataaggctagtccgttatcaacttgaa…	Modified U6 promoter; BstXI cut site; sgRNA sequence; BlpI cut site; stem loop
