# Supplementary material for: An engineered transcriptional reporter of protein localization identifies regulators of mitochondrial and ER membrane protein trafficking in high-throughput CRISPRi screens
Source: eLife. 2021 Aug 20;10:e69142. doi: 10.7554/eLife.69142 (PMC8423448; doi:10.7554/eLife.69142)
Supplement: Supplementary file 2. — Sequencing and CasTLE analysis results from the whole-genome screen and sublibrary screens. Comparison of individual validation data to sublibrary screen data. WGS_sgRNAs: sgRNA sequences and target genes in the whole-genome screen. TA_WGS: CasTLE analysis of the whole-genome screen (TA screen HiLITR configuration). Sublibrary_sgRNAs: sgRNA sequences and target genes in the sublibrary screens. TA/SA/ER_Sublibrary: CasTLE analysis of the sublibrary screens (TA/SA/ER screen HiLITR configurations). Sublibrary_Comparison: comparison of combined-replicate CasTLE analysis across the TA/SA/ER sublibrary screens. Hits&Validation: sublibrary screen data for genes mentioned in main and supplementary figures, with independent validation data appended where applicable. [file elife-69142-supp2.xlsx]

## Sheet: ColumnDefinitions
Column Value	Explanation
Gene Info/Localization/Process/Function	Gene annotation derived from NCBI ontology resource
# elements	# of sgRNA sequences quantified in the replicate
CasTLE effect	log2-scaled maximum likelihood estimate of enrichment in HiLITR-active vs HiLITR-inactive samples, relative to nontargeting controls. Positive values indicate increased HiLITR activation, while negative values indicated decreased HiLITR activation.
Combo CasTLE effect	CasTLE effect derived from the analysis of results across both replicates
CasTLE score	Twice the log-likelihood ratio of the CasTLE effect. A measure of statistical confidence, where greater magnitude indicates greater confidence. May be signed to match direction of effect.
Combo CasTLE score	CasTLE score derived from the analysis of results across both replicates (not signed for direction of effect in this paper)
Minimum effect estimate	Lower bound of 95% confidence interval of CasTLE effect estimate
Maximum effect estimate	Upper bound of 95% confidence interval of CasTLE effect estimate
CasTLE p-value	Proportion of 2 million bootstrapped samples with significantly larger CasTLE effect than test sample
10% FDR	Indicator of whether the gene is a hit at a 10% FDR threshold calculated using the Benjamini-Hochberg method
Genes with different names between table and text/figures
Table	Text
ASNA1	TRC40
GET4	TRC35
FDFT1	SQS
TOMM70A	TOMM70

## Sheet: WGS_sgRNAs
Internal_ID	Gene	sgRNA
1	A1BG	GGAGACCCAGCGCTAACCAG
2	A1BG	GGGGCACCCAGGAGCGGTAG
3	A1BG	GCTCCGGGCGACGTGGAGTG
4	A1BG	GAACCAGGGGTGCCCAAGGG
5	A1BG	GGCGAGGAACCGCCCAGCAA
11	A1BG	GCCGGTGCAGTGAGTGTCTG
12	A1BG	GTGCTGACGGGTGACACCCA
13	A1BG	GGGACAAGCCCGAGCGGCAG
14	A1BG	GTCCTGTGGACAAGCCCGAG
15	A1BG	GATGATGGTCGCGCTCACTC
21	A1CF	GAGAGATCCCCACCCGGAAA
22	A1CF	GGGGATCTCTGAAATTACTC
23	A1CF	GGAGTGCCTGTCCCAATCCT
24	A1CF	GACCACGGAGGGTTCAAGAG
25	A1CF	GTTCTCAGGGTCCTAGGATT
31	A2M	GAGATGGATTGTAGGGAGTA
32	A2M	GTTGGGACCAGATGGATTGT
33	A2M	GCAGAGACTGAGGCGTCTGT
34	A2M	GAAGAAGATGACAGTATCAT
35	A2M	GAATATGCAAAGCCTTCCTA
41	A2ML1	GCTCGGTGAGGGCCTCCTGA
42	A2ML1	GCAGATTTTTCCAGGGTCAG
43	A2ML1	GAAAATGAGGTGCATAAGGA
44	A2ML1	GAGGCATGTGTGCTCGGTGA
45	A2ML1	GTCTGCAATGGCTGGTGATA
51	A3GALT2	GCAGCCATTAGGTCTTAAGG
52	A3GALT2	GGGGGGACAATGGTATGGAG
53	A3GALT2	GCTCAGGTGAGGGGGGACAA
54	A3GALT2	GCCCATATGGCTCTCAAGGA
55	A3GALT2	GGGCTCTCAAGGAGGGACTC
61	A4GALT	GGTACCTCTAGCTCCAGCGG
62	A4GALT	GCTGGAGCTAGAGGTACGAG
63	A4GALT	GGGCTCTGCCCGGCCACCGT
64	A4GALT	GGAGGAGCGCGACTCACCCA
65	A4GALT	GGAGCGCGACTCACCCACGG
71	A4GNT	GGCATTTGCAGCTAGAAGTT
72	A4GNT	GGAACACAGATCTCACGTCT
73	A4GNT	GTTCAGAGCCTGGACTTTGG
74	A4GNT	GACAGATCTCACGTCTTGGC
75	A4GNT	GCTTGCTAATCGTGTGATCT
81	AAAS	GAGGACGAGTACGCGGTCCC
82	AAAS	GCCTCGCCGTTTGTCCCTTG
83	AAAS	GACGGCGAGGCGGAACTCAA
84	AAAS	GCCCCGGCAGGAGGCTAGAA
85	AAAS	GGGGTACCGCAAGGGACAAA
91	AACS	GCGGCGGCGGCGGGGAACAA
92	AACS	GCCCGGTCGGGAGGAGATCC
93	AACS	GTGGCGGGCTGGGTCAGCGA
94	AACS	GCTGGGACCGGAGGAAGCGA
95	AACS	GCGGGCTGGGTCAGCGACGG
101	AADAC	GGAAGCGGGACGTTCACCAT
102	AADAC	GCTATTCAGGCATATCATGT
103	AADAC	GGTTTCTAGAGACCAAGAAG
104	AADAC	GCCTCAACGTTATCTGGGAG
105	AADAC	GCCTAAGATAAGAATTTCAA
111	AADACL2	GGTAGAGCAATTGTAGACTT
112	AADACL2	GACTGTTACTCACAGATATA
113	AADACL2	GTGGAAAAAGGGATATTATG
114	AADACL2	GGTTTTAGCGATGGCATCCA
115	AADACL2	GGCTAAAACTTGTACATTTA
121	AADACL3	GGAGAGGAAGCTGTGCGCAG
122	AADACL3	GGGCTGAGAACCACCTAATA
123	AADACL3	GACCCCTAGTGAGAACACTC
124	AADACL3	GGTGGAAACCATTTAGGACA
125	AADACL3	GCAGCTGGAAGATGCAATGG
131	AADACL4	GCAAGAGTAGCACTAGCCAG
132	AADACL4	GAGACCCCCAGGAAAAAGAT
133	AADACL4	GCACCAAAGTGACCAGGTAG
134	AADACL4	GAGGCCACGTCGTAACCTGG
135	AADACL4	GAAGGTAGCAGGGATATCCG
141	AADAT	GTCCCGAGGATTAGGATCAC
142	AADAT	GCGGCCCAGAGGCTAGCCCA
143	AADAT	GCGGTGGCGTTGCCAGAGTG
144	AADAT	GTAGCAGGCAGGACTTGACG
145	AADAT	GGCTGGGAATCACCGCAACC
151	AAED1	GTCACGCACGGCGAAGTACA
152	AAED1	GCGGTCACGCGGCAGGTTAG
153	AAED1	GCGCGGCCGCTTCCCAACTA
154	AAED1	GCCGGTCCGCGCTGACAGAG
155	AAED1	GGCGCGGCCATGACGCGGGG
161	AAGAB	GCTCGCGAGCCGGTTCCGTC
162	AAGAB	GTGGTCTCCTGAGAAGACGG
163	AAGAB	GCGGCTCGCGAGCGCAGCTA
164	AAGAB	GCAGCTGGTGACTAACGCAC
165	AAGAB	GACGCCGAAGAAGGCCGAGT
171	AAK1	GGGCCTGCGACGCAGAGAAG
172	AAK1	GCTGCGACGCAGAGAAGAGG
173	AAK1	GCCCGGCGAGAAAAACCGTG
174	AAK1	GCCCCACGGCCGGATTCGGG
175	AAK1	GCCGCCGAGCCGTCTCAAGT
181	AAMDC	GGCGCTGGGAGCGTAAGTGC
182	AAMDC	GTGCAGGGCGTATTCCCGGA
183	AAMDC	GCAGCCCAGCCCCTAATTAA
184	AAMDC	GCAGATCCCGAAGCAGCGCT
185	AAMDC	GGAGACCAGGCTCTGCTAGG
191	AAMP	GGCTGACTCTGGGAGGCGTT
192	AAMP	GGGAGGGCCAAGGGGATGAT
193	AAMP	GGTCGCGCAGAGCTGACTCT
194	AAMP	GGGCGCGCGGGACACAGGAC
195	AAMP	GGACACAGGACGGGAGGCCA
201	AANAT	GGCCATCTGGATAGAAGTAG
202	AANAT	GTAGAAGTAGAGGCTCCCTA
203	AANAT	GGGAGGTTAGAGGGAGCCGG
204	AANAT	GGGGGCCTGTCCGCAGGCAC
205	AANAT	GACGGGAACCAGTAAAATCC
211	AAR2	GACCGGAACGTGGGGCGAGG
212	AAR2	GTCCGCTGTACCGGAACGTG
213	AAR2	GGACTCTGAGCCGAGAAGAG
214	AAR2	GCGGTACAGCGGAAACGCAC
215	AAR2	GGGAAGTCACGCAGAGAGTA
221	AARD	GAAGTCCCCGGGGCCCATCG
222	AARD	GCTGCAGCGGCGGAAGTCCC
223	AARD	GGCCCCCCAAGGCGTCGGGT
224	AARD	GAGGCGTCGGGTGGGCTACG
225	AARD	GGTCTCCGCGATGGGCCCCG
231	AARS	GCCCTTGGCGGGGGACTCTG
232	AARS	GCGGCGACCCTAGGAGAGGT
233	AARS	GGGGACGGCGACCCTAGGAG
234	AARS	GTGCAGCGGGCCCTTGGCGG
235	AARS	GAGGGCGGCCTACCTCTCCT
241	AARS2	GGCTACGATGGCAGCGTCAG
242	AARS2	GTCACTGCCCGGAGCTACGA
243	AARS2	GGCTGCGGCGGGCCATTCGA
244	AARS2	GAGTGGCAGCTGCAGCCCGG
245	AARS2	GGGTACGGCGCTCAGAGTAT
251	AARSD1	GCCGTGACGCCGTACCTCTC
252	AARSD1	GCAGTTATGCCCGAGAGGTA
253	AARSD1	GGCGGGACAGCAGGAGACCA
254	AARSD1	GCGTGACAGTTATGCCCGAG
255	AARSD1	GCGCGGAGCTGCAGACTGAA
261	AARSD1	GAGCGGGAGCCGCAATGGCA
262	AARSD1	GCATTGCGGCTCCCGCTCCA
263	AARSD1	GTCCAGGGAAAAGGGCCAGG
264	AARSD1	GTTGAGGTGTGGCTTCATAG
265	AARSD1	GTCTAAATGCCACCCTGGAG
271	AASDH	GTTTCCCGGATAGCTCGTCG
272	AASDH	GTATCCGCGACGAGCTATCC
273	AASDH	GTCTTCGAAACCACTCTAGG
274	AASDH	GGGAGTGTACACACAGGTCA
275	AASDH	GGACGCAGGAGTGTACACAC
281	AASDHPPT	GGCCATCAGGCCCGAGATAG
282	AASDHPPT	GCGGACCTCGCCGCTATCTC
283	AASDHPPT	GGGCACCAAGCAGAACCGTT
284	AASDHPPT	GGCCATCGCGGCCTCCAAGG
285	AASDHPPT	GACGGACGCCGGGAAGAAGG
291	AASS	GCGACTCGGAAGATTCGAGG
292	AASS	GTGGAAGGCCGGGAAGTAGG
293	AASS	GACAAGTCGGCGCCCCAGAG
294	AASS	GCCTCCCTGCGAGGAATGGA
295	AASS	GATCTTCCGAGTCGCTGCAG
301	AATF	GAGTGGCCGGTCCAGAGCTG
302	AATF	GGGAATCGGATCAAGGCGAG
303	AATF	GGGATCAAGGCGAGAGGATC
304	AATF	GGAGTCGGGGAATCGGATCA
305	AATF	GGCCTCCGCGCGGTCTCTGG
311	AATK	GGCGGCCCCAGATCTCGGAG
312	AATK	GAAGCAGCCGGACCCCCTGG
313	AATK	GCGCAGAGCCCGCACCGGTG
314	AATK	GCAGAAGCAGCCGGACCCCC
315	AATK	GGGCCTGCCCCTCCGAGATC
321	ABAT	GCCCGCAAGTCGGAACCCGG
322	ABAT	GCCAGCGCTGCCGGAACTCG
323	ABAT	GGGATGCGCGCCCCGAGTTC
324	ABAT	GCCGCGTCTTGGGAAGATGA
325	ABAT	GGGGCGCGCATCCCGCAAGT
331	ABAT	GGATGCACTCAGCTGGTACC
332	ABAT	GGTACCCGGCAAGTGCGCAA
333	ABAT	GCGGCAAGTGCGCAAGGGAG
334	ABAT	GCCTGGTAGTCGGAGTCCTG
335	ABAT	GCTTGGAAGCAGAGCAGGTT
341	ABCA1	GCAGCCCGGGAGAGAAGGGT
342	ABCA1	GGCCGCAGCCCGGGAGAGAA
343	ABCA1	GGCAGCAGCGCAGAGTCCTG
344	ABCA1	GCTCCCCGGTCTCCACCGTC
345	ABCA1	GCGGGAGAGAAGGGTCGGCT
351	ABCA10	GTCTGAAGAGTAACTGGACA
352	ABCA10	GTCAAGGACTCCTCTACAAA
353	ABCA10	GAAGAGGCAACCATTTGTAG
354	ABCA10	GTTGAAGCACTTGGATCCAC
355	ABCA10	GAACCATACAAATTCTCAAA
361	ABCA12	GCATGGAGAGTAGGAGGTGT
362	ABCA12	GTAATTTCATGGAGAGTAGG
363	ABCA12	GTGTTCTCTAAGGTGTGGAT
364	ABCA12	GATCTGAAGCTGATGAAACA
365	ABCA12	GACATACAGCAAGTTGGACG
371	ABCA13	GCCACAGCAGGGCTTTGAAC
372	ABCA13	GGGAACCCTATGGAAAACCA
373	ABCA13	GACCAAGGCAAGCACTCACC
374	ABCA13	GAGGGCTTTGAACTGGCACC
375	ABCA13	GCAGCAGGCATGGGGCATGC
381	ABCA2	GGCGGTGCTCGGCTGAGTCA
382	ABCA2	GCCGCGCGGGCGATGCCCAG
383	ABCA2	GTGGTGCAGGAAGCCCATGG
384	ABCA2	GCAGGACTCTGGCTCGAGGG
385	ABCA2	GCAAGCGGCGCTCAGGACTC
391	ABCA3	GGGGAGGGGACCCCGCGAGA
392	ABCA3	GCTGCGTGGCCGCCCTGGAG
393	ABCA3	GACACGCCCAAGGCTCGGAT
394	ABCA3	GGGTGCCGCTCCCTCAGCGT
395	ABCA3	GGCAGTGCGGGACACGCCCA
401	ABCA4	GAGAGAGCGGTAGACTGGAC
402	ABCA4	GGAGGCCCCTCAGACAGCAA
403	ABCA4	GGCGTGGATGCCCTAGAGAG
404	ABCA4	GGAGCCAGAGGCGCTCTTAA
405	ABCA4	GCAGGCAGGTGTAAAACGGG
411	ABCA5	GAACGACAGCGTCCAGGCAA
412	ABCA5	GCGGCCGGACCCGGTCCCAG
413	ABCA5	GCCCGAGCCGCAGAGCTGTC
414	ABCA5	GGCAGTGTCCCGAAGTCCCA
415	ABCA5	GCCAGCTGGGATCTGTGCGA
421	ABCA6	GCAGGCTGTGTAAGAGCTGC
422	ABCA6	GTGTGCTGTGCCAAATATGT
423	ABCA6	GCAGTGTCCACCCACATATT
424	ABCA6	GCATCATGTACAGCTTGGTC
425	ABCA6	GACACCCCTTTTCAGAAACC
431	ABCA7	GGCGCACTTGGCTTAAGGGG
432	ABCA7	GCTGGAAGGTGAGAAGGACT
433	ABCA7	GGAATCTGACGCTGACAGAG
434	ABCA7	GGACCCAGACCCTTACGCCA
435	ABCA7	GGGAGTGCAGGAGTTCTAAC
441	ABCA7	GAGAGGTCAGGACAACGGTC
442	ABCA7	GCGGTCGGGCTGAAGACGTG
443	ABCA7	GTGTGAGACCAGGGCCGGGT
444	ABCA7	GTCACCAGGCCGCCAATACA
445	ABCA7	GGGGCTGAAGACGTGCGGTG
451	ABCA8	GTTCTAAACAAGGAGCTCAG
452	ABCA8	GTTGATTGCACAATAATGTA
453	ABCA8	GGTGAAGACTGCTTTCAGAG
454	ABCA8	GAAGACTGCTTTCAGAGTGG
455	ABCA8	GGAACTTACTTCTGGGAAAA
461	ABCA9	GAGAAACACAGTTCATCCAT
462	ABCA9	GGCAATGCTTACAATTCCTC
463	ABCA9	GGATGTAGTAGTGACCCAAA
464	ABCA9	GTAGAGGTTAACTTACTCTC
465	ABCA9	GCATGGGTCTCTGCATGTTC
471	ABCB1	GGGAGGAGCTACATGAACTA
472	ABCB1	GCTTAAGAAAGGAAGTAAGT
473	ABCB1	GGTGTTTATCCCAGTACCAG
474	ABCB1	GTTTATCCCAGTACCAGAGG
475	ABCB1	GAGAAGTTAACTAAAAAATG
481	ABCB10	GCGATAGGGACCCGGGAACG
482	ABCB10	GCGCGGCCAGCCGCGTTCCC
483	ABCB10	GCCGGCGGGCTGAGGCGTAC
484	ABCB10	GCAGGCGCGCGCAAAGCCCG
485	ABCB10	GCAAAGCCCGAGGACCCTCC
491	ABCB11	GGAAATAATGGACTCCACTG
492	ABCB11	GTCCACTGTGGAGAGTTAAA
493	ABCB11	GAGTTAAAAAAGAAGCCCAC
494	ABCB11	GGAATGATGAAAACCGAGGT
495	ABCB11	GTCAAAGTAAAAATACCAGT
501	ABCB4	GGCGAGGTTCGAGGTGAGAG
502	ABCB4	GTTCGAGGTGAGAGAGGTCC
503	ABCB4	GACCTCGCGCGTGTCTGGCA
504	ABCB4	GCCAAAACAAAGGTCTTCAA
505	ABCB4	GGCCGCGGCGAGCAAAGTCC
511	ABCB5	GGCTCACAGAGAGATATTAG
512	ABCB5	GCCTCTTAGAAAAGAATTAA
513	ABCB5	GATGTTGGCCAGTTGTTTAT
514	ABCB5	GATAACCTGGAAAATATGAA
515	ABCB5	GGCTCCTCGGGCTATTGCGA
521	ABCB6	GGCCGCCACGCACTCACGCA
522	ABCB6	GGAAGCAGCTGCAGCACGTA
523	ABCB6	GCACGTAGGGAGAGATGCGA
524	ABCB6	GGGACTGGTCACTCGGAGAG
525	ABCB6	GCCCGCAGCTTGGCGCCCAG
531	ABCB7	GAGCCGCTAACAGAGACTAA
532	ABCB7	GTAGGCTCGAGCGGTTCCCA
533	ABCB7	GATGCATTCTTGGCGCTGGG
534	ABCB7	GGATCAGAATCGCGGAGTGC
535	ABCB7	GAAGGGCAAGGGGACCTGTA
541	ABCB8	GGCCAACATAGAGCCCTCAG
542	ABCB8	GGTGAAACTGCTATTGCCGG
543	ABCB8	GCGCGTGTCAGCCAGAAGGA
544	ABCB8	GCAGTCCGCACTCCCGACCG
545	ABCB8	GGGAAAGGGGACCCCCGGTC
551	ABCB9	GGCAGCGGCGCAGCGCGGGT
552	ABCB9	GGCTGCCTCTTGGAAAATGT
553	ABCB9	GCGCTGCGCCGCTGCAAGGT
554	ABCB9	GGGAGGTGTTGGAGGATCCT
555	ABCB9	GGGTGCCAGGTAACAGGTAA
561	ABCB9	GGCGGCGCCATGGCTCACGT
562	ABCB9	GGACGGCGGCCAGTTCCCAG
563	ABCB9	GGGAGTCGCAGCCGGTCCCG
564	ABCB9	GCGACCCCCGTCCCCGGGAC
565	ABCB9	GGAGCAGGAAAGACACCTCG
571	ABCC1	GCTGGCGCTAGCGCTGGCGG
572	ABCC1	GCAGGAAGGCCTCCTCACGG
573	ABCC1	GAGGGGACGCTAGAGATGGG
574	ABCC1	GGGTCAGAGCCGCCGTGAGG
575	ABCC1	GTTCCTGCGGAGCAGAGCGT
581	ABCC10	GTGGCACCCCACCTAGAGGT
582	ABCC10	GTAGCGAGGTCTCTGGAGTA
583	ABCC10	GCTAGGTGGGGTGCCAGCCG
584	ABCC10	GGGTCTTCCAACCTCTAGGT
585	ABCC10	GCCCCGAGGTGGGTAGAGAC
591	ABCC11	GACGCTCAAGTCTTACCGGG
592	ABCC11	GAGGACGCTCAAGTCTTACC
593	ABCC11	GTGGCTTCGCGCTGCTCTCT
594	ABCC11	GGGCAGAGGCTGCAAGCCGT
595	ABCC11	GCACGTCTTTCCGCATAGGT
601	ABCC11	GGCACACTAACGTGCAGAAA
602	ABCC11	GTACTTCTAGGATAACTAGA
603	ABCC11	GTGGTACAATCTTTCCACAT
604	ABCC11	GAAAAGTCTTCATAGAAGTC
605	ABCC11	GTCTGTGTGGCAAAGAACGC
611	ABCC12	GCCAAGAGCAGAAAACCCTA
612	ABCC12	GAGCAGAAAACCCTATGGTG
613	ABCC12	GGGAGCCGGTCCAATGACCA
614	ABCC12	GCAACCAAAACCACACCATA
615	ABCC12	GCTGGTCCAGATCTGAGATA
621	ABCC2	GTCTCAGCAAGACTCAGTCA
622	ABCC2	GTTCCTCACACGGATTAAAT
623	ABCC2	GTCACACGGATTAAATTGGA
624	ABCC2	GCTCCAGAGGATATAAGATC
625	ABCC2	GCTTGTTTCATCAAAGAAAG
631	ABCC3	GCGAGCGCGGTCGGACCCAG
632	ABCC3	GCGAGGCGCGGCTGCAAGGA
633	ABCC3	GCCTTCCGCACCCGACGGAG
634	ABCC3	GCCAGTGCTGCAGCCGGGAA
635	ABCC3	GGGCGCCCAGGCCGTCTCAG
641	ABCC4	GCGCCGCGGACGCACTCTCC
642	ABCC4	GGCCCCAGCATCCCTGCTTG
643	ABCC4	GCGCTCCTGGACCTCAAGCA
644	ABCC4	GGCCGAGCGGACAGGCGTGG
645	ABCC4	GCGGGGTCGCGCTGATCAGG
651	ABCC5	GGGCGGCGGCAGGAGACCAG
652	ABCC5	GCTGGGATGCCCGGGCCCTA
653	ABCC5	GGCTCGGGAGCGTGGTTGAG
654	ABCC5	GGCGGCCGATGCCGCTATAA
655	ABCC5	GCGAGCGCGACCCACACCCA
661	ABCC6	GCTCTTAGCAAAGGACTCCA
662	ABCC6	GGAGAGTGGGGCGCGATGGG
663	ABCC6	GAGCCTGGAAAAGGAGAGTG
664	ABCC6	GTGGGACCCACGACGACAGA
665	ABCC6	GCGACGACAGAAGGCGCCGA
671	ABCC8	GGCGGAGCTGCAAGGGACAG
672	ABCC8	GGATCCCGCGCCAAACACAG
673	ABCC8	GGTGTTTGGCGCGGGATCGG
674	ABCC8	GTGAAGAGTAGGAAGACGTG
675	ABCC8	GGGGGCACCGGGGGAGTGAA
681	ABCC9	GCCCGGCTCGAGAAGTGAAG
682	ABCC9	GGCTCGAGAAGTGAAGGGGT
683	ABCC9	GGAAGGTAGCTCAAGTGCAC
684	ABCC9	GAGCTCAAGTGCACCGGCAG
685	ABCC9	GAGGTCTCCGGCCCCAGGCG
691	ABCD1	GCTTCAGCCAGGCTGCGGAG
692	ABCD1	GGAGCACCGGCATGTCACCT
693	ABCD1	GGAGAGGTCTCGGGCAGAGG
694	ABCD1	GCGGGGAGGGGCGCCACCGG
695	ABCD1	GACCAGCCCCAGTCCCTACG
701	ABCD2	GTCATTCCCGGTAGATGCAG
702	ABCD2	GGAGAAACGCTGCAGACTAT
703	ABCD2	GAGACTCCGCTGCATCTACC
704	ABCD2	GCTGCATTCACTCCAGGCGA
705	ABCD2	GTGTGACCACTGAAACAGGG
711	ABCD3	GGTACCAGCGAGCCGGCGAG
712	ABCD3	GTACTTGCTGAAGGCCGCCA
713	ABCD3	GCCCCGCGCTGCGTGCAGTA
714	ABCD3	GACTGCCGGTACCAGCGAGC
715	ABCD3	GCACAGAAGGGGGTGATGTA
721	ABCD4	GTCCCTCGGGTCTCAGGTCA
722	ABCD4	GCGGCGTTTGATAGAGAGGA
723	ABCD4	GGCCATGACCTGAGACCCGA
724	ABCD4	GTACTGGGTAGAGTCCGAGG
725	ABCD4	GCTACCCAGTACTGAACTAG
731	ABCE1	GCGTTGGCGAAGCCAGCTGC
732	ABCE1	GCTGTGTGGCTGAAAAGTGA
733	ABCE1	GGCCGTGAGAACACGCTGTG
734	ABCE1	GCGGCCACCGGCCAAAATGG
735	ABCE1	GAAAGGGGGAGTGGAGACTA
741	ABCF1	GGTGGCAGTTACAGCTACTG
742	ABCF1	GCCTGGTGGAATACAGTGTA
743	ABCF1	GTGGCACCGAGGGAGAGATG
744	ABCF1	GCGGAAGCGGAAATAGCACC
745	ABCF1	GTCCCCGGCAAACTCCTCCC
751	ABCF1	GGAGAAGAATCGGATCAATA
752	ABCF1	GTGCCAAGCCGGAGAAGAAT
753	ABCF1	GATCAATAAGGTGACAGTGG
754	ABCF1	GCCGGCTTGGCAGGCTTAGG
755	ABCF1	GTCTCCGGCTTGGCAGGCTT
761	ABCF2	GCCGCACGCGGAGGATCCTA
762	ABCF2	GACCAGGTTCTGCCCCTCAG
763	ABCF2	GGACGGAGACCTCCGCTGAG
764	ABCF2	GGCGAGGCCCAGTGAGTTAG
765	ABCF2	GTGCGGAGCGCCAAGTTGTA
771	ABCF3	GGACTTGCGCCGAAATCCTG
772	ABCF3	GGCGCGGACGGGTTCCTGAG
773	ABCF3	GTCACAGCGACTGCGCGGAC
774	ABCF3	GGACCTGGTGGAAGCTGTAG
775	ABCF3	GCTATTGCAAGAGGTGTCCG
781	ABCG1	GGCCATCGGTCCAACTTGTA
782	ABCG1	GCAGCCCGCACCCCGCGCAG
783	ABCG1	GTCCTCTGGGCGCTGACCCA
784	ABCG1	GGGAGCCGGGCGCCACTCTA
785	ABCG1	GCTCGGGATGCCCCTTGCAC
791	ABCG2	GCCACTGCGTTCAGCTCTGG
792	ABCG2	GGCTCGTCCCCTGGATGTCC
793	ABCG2	GGGGAGACCCGGACATCCAG
794	ABCG2	GACATCCAGGGGACGAGCTC
795	ABCG2	GCGGTCCACAGCCCGAAGCG
801	ABCG4	GCTCGGAGGACACAGCGTCC
802	ABCG4	GGCTTCCCAGAGCCTGGTCC
803	ABCG4	GGCGTCCGGGACCAGGCTCT
804	ABCG4	GAGTCGCCCCGCGGGCTCGG
805	ABCG4	GCGGCAAGGATGGTGAGAGG
811	ABCG5	GCAGGCCGTAGACACTGGGT
812	ABCG5	GGGCCTGGGCATAAACAAAG
813	ABCG5	GCCCAACTGAAGCCACTCTG
814	ABCG5	GGAGGGCAGGCCGTAGACAC
815	ABCG5	GGCCAACAGGCAGCAAAGCT
821	ABCG8	GCCCACAGGTCTGTGACCCT
822	ABCG8	GCTAAGAGAGCTGCAGCCCA
823	ABCG8	GTAGGACAGAAGGCTCCTGA
824	ABCG8	GTCCCGGCCATGGGGCCCAC
825	ABCG8	GCGGGTGGTGCTAGGACAGA
831	ABHD1	GGGATGCAGAGGCACTAGAG
832	ABHD1	GTATAGGGAGCAGCACCCTC
833	ABHD1	GGGGATCACATGGGATGCAG
834	ABHD1	GGCTGGCATGGGGATCACAT
835	ABHD1	GGACCTGCACAGGCCGCCTA
841	ABHD10	GGGGACAACTACGAAGATGG
842	ABHD10	GGCGTAGCGTGTCCCTCAGT
843	ABHD10	GTGAGGGACACGCTACGCAA
844	ABHD10	GGTGTTGGCCTTTAATGCAG
845	ABHD10	GCGGTAACTGACGGAACCCG
851	ABHD11	GCCTCCAGGCTCGGGTCCAG
852	ABHD11	GCCGAGCCGAGGTCAGTCAA
853	ABHD11	GGTCTGCTGGGCCAAGATCT
854	ABHD11	GGGCCGGCTCGCATCTCACA
855	ABHD11	GGCCCAGCAGACAGGCCGTA
861	ABHD12	GTGCGCCGGCTACGAACCAG
862	ABHD12	GTCGGGCGGACGGCCACTCT
863	ABHD12	GTGGCGGCGGCTGTGAGCGG
864	ABHD12	GGCGGACGGCCACTCTGGGA
865	ABHD12	GCTGGGATGTGAGGAGCGGC
871	ABHD12B	GCGGACTGCAGCTCCCGCGG
872	ABHD12B	GGTGGCGGCGTATCGGGACA
873	ABHD12B	GTTGAGGCTGAGGATAGCAA
874	ABHD12B	GCTGGACCAGCGAGACTCTC
875	ABHD12B	GCGCCGGGGCGGGAAGGTCG
881	ABHD13	GCGCCGGCAAATGCCCCCGC
882	ABHD13	GGCCCCCGCTCGGGTGTCGC
883	ABHD13	GGGAGCTCCGGGCTAGACCG
884	ABHD13	GTCCGCTCACCACTCACCAG
885	ABHD13	GTGAGTGGTGAGCGGAGTCG
891	ABHD14A	GGGTAAAGACGGCCCTCCCC
892	ABHD14A	GCCCAACGGGATGAGCGGGC
893	ABHD14A	GCCGCACAGCGCCCCGACCA
894	ABHD14A	GGCGGAGGCAGCCATGGTCG
895	ABHD14A	GGCTCCTGGCCGCCTAGAGC
901	ABHD14B	GAGTGCAGGGCGGGTACCTG
902	ABHD14B	GGCGTGCTGGCGGTGACCTG
903	ABHD14B	GGAGCCAGAACCGTAGTCCG
904	ABHD14B	GGGGTACCTGGGGAGCTGCG
905	ABHD14B	GACGGGAAGCAGGCGCGTGC
911	ABHD14B	GGCCTCCTGGAGTTCAGTGT
912	ABHD14B	GGCCTCAGCGAGATTACTGG
913	ABHD14B	GAGATCCGGATCCCGTCCCC
914	ABHD14B	GGCCCACACTGAACTCCAGG
915	ABHD14B	GTCGCTGAGGCCCGAACCAG
921	ABHD15	GCGAGGGCGGCGCCCCACGG
922	ABHD15	GCGCTACGGGCAGGACGAAG
923	ABHD15	GGCTCAGGCCCAGGCGCTAC
924	ABHD15	GGGTCCTACCACCCAGTCCA
925	ABHD15	GGAAGCTGGAGAGCCCCGGC
931	ABHD16A	GCACGACACACAGGGTCGGG
932	ABHD16A	GAGGGCACACAACACCTCAG
933	ABHD16A	GAAGGAGGCGGCCAGTCCGT
934	ABHD16A	GCGGTACGGGCTGACGTCAA
935	ABHD16A	GGCACGAACCACGACACACA
941	ABHD16B	GCGCGGCGATCCCGGCCCAG
942	ABHD16B	GGATCGCCGCGAGAGGCACA
943	ABHD16B	GAGCAGATGACGCACATGAG
944	ABHD16B	GAGGCACAGGGCAGTCTTAG
945	ABHD16B	GGCGCGCGTCATCAGGGACA
951	ABHD17A	GCCGCAGCTCCCCCCACGGA
952	ABHD17A	GTCGGACGGGTGCTCCCCGA
953	ABHD17A	GGGCAAAAGAGCGGAATCCG
954	ABHD17A	GGAAGCGTTTGTCGGACTGG
955	ABHD17A	GGCTCACTTCCGTCCGTGGG
961	ABHD17B	GCTGCAGACTGGCCCGACAG
962	ABHD17B	GCCAGTCAGTGGCCAACTCC
963	ABHD17B	GGACAGAGGAGCGGGGACCA
964	ABHD17B	GAGGCCCGAGAGCAACCGAC
965	ABHD17B	GGTCTGCAGGCGGAGAGAGT
971	ABHD17C	GGGCTGGCCCGGGAGGACGG
972	ABHD17C	GCGCGAGAAGAAGACCTCGA
973	ABHD17C	GGCTGGCAGGCGAGCGCGGA
974	ABHD17C	GCCGTGTAGGTGGGCTCGGG
975	ABHD17C	GGCGCCAGCACCGTGTAGGT
981	ABHD2	GAGCTGCAGGAACCAGACTG
982	ABHD2	GCAGGAGTGAGCACCAATGG
983	ABHD2	GTGAGCGCCGCTGGCAGCCG
984	ABHD2	GGATATACAGCCGGAACCCC
985	ABHD2	GGGCTCGGCGAAGAAGGTCC
991	ABHD3	GGGAGCGCGGCTTCCGACAA
992	ABHD3	GGGGTGGGGTTCTTCGGCTC
993	ABHD3	GCGCCAGGCAGGAGACACTG
994	ABHD3	GAGACACTGTGGTCGGGAGT
995	ABHD3	GCGGCAGCCCCGGGGATAGG
1001	ABHD4	GGGGCGGGCTCGCCAGGACC
1002	ABHD4	GCCACGACTGCCGTTCTGGG
1003	ABHD4	GCTCGACTTGCCCCCCAGAA
1004	ABHD4	GGCCCGGCAAAGAGAAGATG
1005	ABHD4	GCAACATGGAATCTCTCCAG
1011	ABHD5	GCCGGCTTCGAGATAAGTCC
1012	ABHD5	GTAAGTGCCGCGCCAGCCCG
1013	ABHD5	GGGCTGCGCTTACCTCTCTC
1014	ABHD5	GGCTGGCGCGGCACTTAAGG
1015	ABHD5	GGGTGGCTTATACAACAACG
1021	ABHD6	GGCCCGGGGCTAGAGACCGA
1022	ABHD6	GCCGCTGCAGGGAGACACTG
1023	ABHD6	GGGACAGAGTGAGGACGGGT
1024	ABHD6	GCACTGCGAGGGGCGCCTAA
1025	ABHD6	GAGCTGGGAGCGGCGCGGGT
1031	ABHD8	GCCCCTGGCGGTCAGCGCAG
1032	ABHD8	GGCAGTGGCCCCAGACATAC
1033	ABHD8	GGCCACTGCGGCTCAGTCTC
1034	ABHD8	GAGGCCGGGTGCGTCTACGC
1035	ABHD8	GCGGGTGCGTCTACGCGGGC
1041	ABI1	GTCTCGCGTTAAAGAGACAG
1042	ABI1	GGAGGCAGCAAGGTCCGCCG
1043	ABI1	GTGGTGGAAACCGATAGAAG
1044	ABI1	GCGGGCTGCGATACAGGAAG
1045	ABI1	GGCGAGAGGAAGCGATGCAG
1051	ABI2	GGAAATCCCGGGGGGCCGCC
1052	ABI2	GCAGCGCGCGACAGGGGAGG
1053	ABI2	GACTCCGAGGACGGTCACCG
1054	ABI2	GAGCTCCCCACCCCCATCGG
1055	ABI2	GGACCGTCCTCGGAGTCCGT
1061	ABI3	GGCAGAGGAAGCCAAGGTCG
1062	ABI3	GAGGCAGAGCAACCAATCAA
1063	ABI3	GAGCATCTGTGTGAGGACGG
1064	ABI3	GTCAGAGCCTCCCGGCCAGT
1065	ABI3	GTAGTCAGCGACCCGCAGCA
1071	ABI3BP	GCATGGGGAATGATGCTGGT
1072	ABI3BP	GGACTGTCTCCCAGTGACAG
1073	ABI3BP	GCATCATTCCCCATGCGAGG
1074	ABI3BP	GAGAAGTAGACACCCCAAAC
1075	ABI3BP	GGCCGCCCGCCTCTGTCACT
1081	ABL1	GGCGAGAGCGGCCACTAGTT
1082	ABL1	GCAGCGAGCGTAGAGGGAAA
1083	ABL1	GAGGGAAATGGCATATACGT
1084	ABL1	GATGAAGAAGCTAAGATAGG
1085	ABL1	GGAACGGTCAGCGAGCGTAG
1091	ABL2	GCTCTGCCATAACTATTAGG
1092	ABL2	GGATCTCTGCCATAACTATT
1093	ABL2	GTGGGCAGAGGTATGGTCCT
1094	ABL2	GGCCATAACTATTAGGTGGA
1095	ABL2	GGTTTAACTTTTGTGCTTCT
1101	ABL2	GCGGGGCGCACCACAGAGAC
1102	ABL2	GCGAGGAGGAATGTGACCAG
1103	ABL2	GCCGAGCGCTGGGAAAGCGT
1104	ABL2	GGGAGCCGGCATGAGAGCGT
1105	ABL2	GGGCGCGGAGCCGCGACAGG
1111	ABLIM1	GGGGAACAGAGAGAATTGTG
1112	ABLIM1	GATAGTGGCACGCCTATGAG
1113	ABLIM1	GCAAGGACTACTGCCCACGT
1114	ABLIM1	GTACAGCAAATGAGTGATAG
1115	ABLIM1	GCTGATTGTTGAGGACCGGA
1121	ABLIM2	GCTGGCGTGTGCGCAAGGAG
1122	ABLIM2	GCCCGTGAGAAGCAAAGAAG
1123	ABLIM2	GAGCAGACCTAGGCACGCAG
1124	ABLIM2	GCCCGGAGCGCGTAGCTCAG
1125	ABLIM2	GCTGCGCCAGGATGTCTGGA
1131	ABLIM3	GGGCCGAGAGGTGGGTTCCG
1132	ABLIM3	GGGCTAGCAATGCGAAATAG
1133	ABLIM3	GGCTACAGCCCAGACAGAGA
1134	ABLIM3	GCACGCGCCTTCAAGGCCAG
1135	ABLIM3	GTGAAGGCGCGTGGACTAAT
1141	ABO	GCCGACCCTGGACTAGGACA
1142	ABO	GGCCAGCGTCCGCAACACCT
1143	ABO	GGAGACCAGACGCGGAGCCA
1144	ABO	GTAGTCCAGGGTCGGGCGGT
1145	ABO	GGTCCGCAACACCTCGGCCA
1151	ABO	GCTCACAACAGGACGGACAA
1152	ABO	GGGCTTCAGTTACTCACAAC
1153	ABO	GTCAGTTACTCACAACAGGA
1154	ABO	GTGTGTTTCTGTGGCCGGAA
1155	ABO	GGGGTGTGTGTGATTTGAGG
1161	ABR	GGCCGCGCCGAGCCCAGCTG
1162	ABR	GGGATCGGGACCCCAAGATC
1163	ABR	GGGATCGGGACCCAGGCACC
1164	ABR	GCGAGCCCAGCTGCGGATCC
1165	ABR	GCCCCCGCGAAGTTGCTCAT
1171	ABRA	GTCAGCAGAGAAAGACAGGT
1172	ABRA	GAGCATGGCTCCGGGCGAAA
1173	ABRA	GCTCCGGGCGAAAAGGAAAG
1174	ABRA	GCCTCAGCCACAGGTACGAG
1175	ABRA	GGCCAAGCTGATGACCAGGG
1181	ABRACL	GAAGTCGACCCGAGAGGTGG
1182	ABRACL	GAAGAGAAAGACGGCTGTGG
1183	ABRACL	GGCAAAGAGAAAGACGGCTG
1184	ABRACL	GTGAGAGTCGGGTCAGGAGG
1185	ABRACL	GTACCTTCTTCAGTGCACTG
1191	ABT1	GACGCGTCCGACCTCGCCAT
1192	ABT1	GACTGACACGAGCGGCACGA
1193	ABT1	GGCTGGTGAATCAGTCTGTG
1194	ABT1	GGGAGCAAGAGCCGCTGGAA
1195	ABT1	GTCAGCGCCTATGGCGAGGT
1201	ABTB1	GCGAGCCGAACGACCTCGGG
1202	ABTB1	GACCCGAGCCGAACGACCTC
1203	ABTB1	GCCGAAGGCGCAGAAGTGGG
1204	ABTB1	GGGCGAAGCCGCGCACCCGG
1205	ABTB1	GTGACGTCCGGGCCCTACCA
1211	ABTB2	GGAATCCCGGGAGAACAGGG
1212	ABTB2	GCAGGGCGCAGCGCGAGTCC
1213	ABTB2	GGCCATGGGGAGCCTGCCGA
1214	ABTB2	GGAGTCCCCGGCCCCATACC
1215	ABTB2	GGGAAGGTGGCCGAGATCCG
1221	ACAA1	GCCAGTCCGGGAACTGACCG
1222	ACAA1	GGCCGAGAGAAGCTCGTCGG
1223	ACAA1	GGTTGACCTGCGCAATGCAG
1224	ACAA1	GCGGCTGTCTGTTAACTCCG
1225	ACAA1	GTAGTGCTGGGCCACCTGAG
1231	ACAA2	GTCACCTCGGAGCAGAGCCA
1232	ACAA2	GCCTCGGAGCAGAGCCATGG
1233	ACAA2	GGACGACCCAGCAGCCGCCA
1234	ACAA2	GCCTGACCACCGAGGCCGAG
1235	ACAA2	GGCGGCTGCTGGGTCGTCGG
1241	ACACA	GGCCGCGTGCGGGTGAGCGG
1242	ACACA	GCCTGCGTGGAGGAACTGCT
1243	ACACA	GAGGGCTCCTCTAGGAAGGG
1244	ACACA	GTTCCGGAGCCCCTGCGTGG
1245	ACACA	GGAGAGGGAGAAGACCACGT
1251	ACACB	GGCGCCCACAGGGTGACTAA
1252	ACACB	GGTGGCTGCATCCCCAGTGA
1253	ACACB	GAGGCTGACAGGCGCCCACA
1254	ACACB	GGTTCCCTTAGTCACCCTGT
1255	ACACB	GCCACAGAGGTTCACTGGAA
1261	ACACB	GGCAAGCGCAGCGCGAAGTT
1262	ACACB	GCAGCCAGGTCGCGACCCGG
1263	ACACB	GTCCCACCGGGCTCCCGCAG
1264	ACACB	GAGGCCAGCTAGAGTTTCCA
1265	ACACB	GCGCAGGGTGCATTTCGGGA
1271	ACAD10	GTCGGAGCGGAAGGACGTCG
1272	ACAD10	GAATTTTGAGGAGGTCGGAG
1273	ACAD10	GGTGGAGATTGCTTGCGCTG
1274	ACAD10	GAACAAAACCATCCAGACTA
1275	ACAD10	GTCTAAGGGGCCGTAGAGAG
1281	ACAD11	GCTGGAGCGGGAACTTGCCC
1282	ACAD11	GCGCTCCACAGACTCCGCCA
1283	ACAD11	GCCCGCAGGCCACAGCAACG
1284	ACAD11	GACAGCAACGCGGCATCCAC
1285	ACAD11	GGTCAGTGGACGCACCCTAC
1291	ACAD8	GGCCAGTGCGAGCGCAACGG
1292	ACAD8	GCGGCGGCTATGCTGTGGAG
1293	ACAD8	GAGCTGCGGCGGCTATGCTG
1294	ACAD8	GGAGGCGCGCCCCGAAACGC
1295	ACAD8	GCGAGCGCAACGGAGGTCGA
1301	ACAD9	GGAACATCGGGCAGCATGAG
1302	ACAD9	GCGCAGTAGCCGCCGGTTCG
1303	ACAD9	GTCCCTGCGGCGCTAAGAAG
1304	ACAD9	GCGCTAAGAAGGGGAGACTG
1305	ACAD9	GGGCTGAGGCTGGGGAACAT
1311	ACADL	GCAGCTGAGGCGTCCACCTG
1312	ACADL	GGCGGCTACTCGGCGACTCG
1313	ACADL	GCGGCGGTCTGTTCTCGGGG
1314	ACADL	GGGCGACGGAGGCGACTCTG
1315	ACADL	GCTGGGTGCAACCAGCATCT
1321	ACADM	GCACTCGGACAATAATACAC
1322	ACADM	GCAGCGCGGAAAGAGAGCCA
1323	ACADM	GGCCGGAACGGGAGCCAACA
1324	ACADM	GTGAGGAAGGAGCCAGCCTA
1325	ACADM	GGTCGCCTGACGGGAGGATA
1331	ACADS	GCGAGCAGCGCGGCGGCCAT
1332	ACADS	GCGGAACAGCGCGCTCGCAG
1333	ACADS	GGCCAACCGAGGCTGAGGAG
1334	ACADS	GGCGGGAGGTCGCGAAGCCT
1335	ACADS	GACAGCGCGCTCGCAGCGGG
1341	ACADSB	GGGCCTGCGGCGAGGATGGA
1342	ACADSB	GGTGCGTTAGGGCATCAGGG
1343	ACADSB	GTCCAGAGATCCAGACTCGG
1344	ACADSB	GAAGGTGCGTTAGGGCATCA
1345	ACADSB	GGGTGGCTCTCAGGACGCAA
1351	ACADVL	GTGCCCTAGGGCGAAACTAG
1352	ACADVL	GGCTCAGTCGCCGAAAGTAG
1353	ACADVL	GGGGTCAGAGCTCGAGCCAG
1354	ACADVL	GGGCAAGCCAGGGTGCCCTA
1355	ACADVL	GCACTGTGGACGATGAGTCA
1361	ACAN	GAGCTCTAGGGCGGAGACCA
1362	ACAN	GCCCGGCACACATAGCTCTA
1363	ACAN	GCTCCCCGCCGCTCCAGAGG
1364	ACAN	GCGCCCGGCGAGCCAGGAAC
1365	ACAN	GGGCACACATAGCTCTAGGG
1371	ACAP1	GGAGGGAATGCCAGCTCTAG
1372	ACAP1	GGCGAGCCTGTGGGCCAAAG
1373	ACAP1	GCCCAGGAAGGGGAGATGAG
1374	ACAP1	GCCAGCACTGCCTGGAAGTG
1375	ACAP1	GGCTCTCACCCCACACTTCC
1381	ACAP2	GTCGCGGCTGCTATGACCAG
1382	ACAP2	GCTCGCAGGGTGGGAAACGG
1383	ACAP2	GCCCTCGGGAGGGCTCGGTG
1384	ACAP2	GACTTCGTCGCCCCTCGGGA
1385	ACAP2	GGCTGGGACGCAGACGGCTA
1391	ACAP3	GCGGGCGGGACGAGCGGTCC
1392	ACAP3	GGACGCTCCCCGGCGGTGAC
1393	ACAP3	GCTCACTGGCACGAGGACCG
1394	ACAP3	GCGGCGGCCGCGGCGCTCAC
1395	ACAP3	GACCCCGCCGCCGGGCACAA
1401	ACAT1	GGTCGCAGAGGGCTGAGTAT
1402	ACAT1	GGCACAGCCATGGTCGCAGA
1403	ACAT1	GCTCCACAGGCGTAGACTAG
1404	ACAT1	GGGCCTGAGCGGTGGGATCG
1405	ACAT1	GTGGCGGCACTTCTGCGCAG
1411	ACAT2	GCTAGCTTGCAGGCAGCGCA
1412	ACAT2	GCTACGCCAACCAATGGGAG
1413	ACAT2	GCGGCGGCGCGGACCATCAT
1414	ACAT2	GCTGCCGCAGGCATTACCGA
1415	ACAT2	GCCGCCCGCGGCAGGCCTGT
1421	ACBD3	GCTGCTGCACCTCCTCAGCG
1422	ACBD3	GGACTCGAGGTGTCCGTCGA
1423	ACBD3	GCAGCAGCCGGAGATGGCGG
1424	ACBD3	GCCTCCTCAGCGGGGACAGA
1425	ACBD3	GACCACAGCCCAGTATGAGT
1431	ACBD4	GTCAGTAGGAAGCCGCGGGG
1432	ACBD4	GCCGGCCCTGCTGGACCCCG
1433	ACBD4	GCGCCCACTGCCAGGACACC
1434	ACBD4	GCCCCCGGCACCATAAGCCA
1435	ACBD4	GGTAGGAAGCCGCGGGGTGG
1441	ACBD4	GAGACTGTGGCTCTCCGAGG
1442	ACBD4	GCCCTTGCGGCCAAGATCAG
1443	ACBD4	GGAGGCTCGCCCGGACTAAG
1444	ACBD4	GGAGACGGACTCACGAGCAG
1445	ACBD4	GGTCCGTCTCCCCTTAGTCC
1451	ACBD5	GCGGACTCCGGCGGAATGGG
1452	ACBD5	GACTGACAGACGGACTCCGG
1453	ACBD5	GTTGGGACCGGGGCCAACAC
1454	ACBD5	GGGGTGTGGCTGCTCCGCCA
1455	ACBD5	GGGAGCCGCTCTCCCACCCT
1461	ACBD6	GCAACGGAACAGGAGTCGAG
1462	ACBD6	GTCAGGGGACGACTCCGGGG
1463	ACBD6	GTCGGACCCAAGCTCAGTCG
1464	ACBD6	GGGAGGAGACCGGGTCGACT
1465	ACBD6	GGGGCCATCACCGGCGACAG
1471	ACBD7	GAAGCGGTGGGTGCGAGAGG
1472	ACBD7	GCGGCGAGCCAGGGCTCCCA
1473	ACBD7	GACACTAAGAGAGGTCCTGG
1474	ACBD7	GGAGGTCCCAACGAGCGAAG
1475	ACBD7	GCTCCCTCTCGGAGACGGAG
1481	ACCS	GCAGATACCCGCACTCGATG
1482	ACCS	GCCCCACTTGCGGGATTCCA
1483	ACCS	GACCGAAACGGCCTTCTACA
1484	ACCS	GACAGCCCAGGTCCGAGGAA
1485	ACCS	GCAAGGGATTCGAGATGGAA
1491	ACCSL	GGATAGGTCGCGGTTGACAA
1492	ACCSL	GGCAGAGGGCCCAACTCTCT
1493	ACCSL	GAGAGGCCAGTAAAGATACC
1494	ACCSL	GGGCCTCTCCTCTGACCAGA
1495	ACCSL	GCCCACGGATGGATAGGTCG
1501	ACD	GTCCCCACGGCTACACCCAG
1502	ACD	GCGGCAGGAGAGCGCGAGGT
1503	ACD	GATCCGCTGGGTGTAGCCGT
1504	ACD	GCCGACGTCGGACGTATCAG
1505	ACD	GGTCCTGTAGTACCTGACGG
1511	ACE	GGGCCGCGGCGCAGGAGAAG
1512	ACE	GCGAGGCGGCCCCCATGACG
1513	ACE	GACCGCGCACCGCGTCATGG
1514	ACE	GGCCCCGCGGCTGACTGTCG
1515	ACE	GAGCACCGCGCACCGCGTCA
1521	ACE	GCCCAAGTGGGACCATGCAG
1522	ACE	GTATGACCGGACATCCCAGG
1523	ACE	GCTCCTGCGGCCATGGGCCA
1524	ACE	GGTGCCCGTAGCAGAGCAGC
1525	ACE	GCTGGCTGGGGACCAGCAGA
1531	ACE2	GTACAGCAACAAGGCTGAGA
1532	ACE2	GGACGATGTCAAGCTCTTCC
1533	ACE2	GGTCTTGGCCTGTTCCTCAA
1534	ACE2	GACTGTGATGAGAATTATGG
1535	ACE2	GGAGAGAAAATCTCATGAGG
1541	ACER1	GTCCACCTCGGAGCTCTGAT
1542	ACER1	GGGTGCCCCTGAGCTAGAGG
1543	ACER1	GAGGCAGCTGTGGTAGGGGG
1544	ACER1	GTCTGATAGGCGAAGATGCT
1545	ACER1	GGCGATGGTGCCTTCTTGGA
1551	ACER2	GCTGCTGCGGAGGCAAAACG
1552	ACER2	GCCACGCGTCCAGGAACCAG
1553	ACER2	GAGCCCAGCTGTCGGGAATG
1554	ACER2	GGAAGATGAGCCCAGCTGTC
1555	ACER2	GGTCCAGCTTCCAGACGCTG
1561	ACER3	GCCTGGTCGCCAGCCTAACC
1562	ACER3	GAGTGAGCGGAGCGCCTGGG
1563	ACER3	GCACAGTGAGCGGAGCGCCT
1564	ACER3	GGAGCCCCTGCTGGACCTAA
1565	ACER3	GCCGCTCACTGTGCCGGGTT
1571	ACHE	GAGCCTGCGCCGGGGAACAT
1572	ACHE	GGGGGAGGGAGACTCACCTG
1573	ACHE	GGGAGGCGGCCGATGTTCCC
1574	ACHE	GCGGGTACCGCCCCAATTAG
1575	ACHE	GATCGGCCGCCTCCAGCTCC
1581	ACHE	GCTCCCACGCGGGGTCTCGG
1582	ACHE	GAGCCCCCGAGACCCCGCGT
1583	ACHE	GGGCGAGGCGCACTCCGCGG
1584	ACHE	GCTGGGCGAGGCGCACTCCG
1585	ACHE	GCGCCGGCCGCTCTCCCACG
1591	ACIN1	GAGTACCTCACGCAAGATGG
1592	ACIN1	GTCACCCGCAGCGCCTGAAG
1593	ACIN1	GTCCAGTGCGGCCTTCAGGT
1594	ACIN1	GCTCAGGCCAGCAACGCCGT
1595	ACIN1	GACAGATACAAACAAGGAGG
1601	ACIN1	GGATCAGCCGGAGACATGCA
1602	ACIN1	GCTCTATTGTATTGGCGGAG
1603	ACIN1	GAGGAAGACGAAGGGAGCTA
1604	ACIN1	GGTGGCTGGCTCTATTGTAT
1605	ACIN1	GCGGAGCGGCAGCGATCAGC
1611	ACKR2	GTATGAGCTGCTATTGAACA
1612	ACKR2	GTCCTTTCAGGATACAGTAC
1613	ACKR2	GTCCCGTACTGTATCCTGAA
1614	ACKR2	GTACGGGATCCTTTCTGGAA
1615	ACKR2	GGTATGACAGATAGACAGGA
1621	ACKR3	GTCCCCATGCCAAATTGGTC
1622	ACKR3	GTCCTGGCTGTGCTGTGCGC
1623	ACKR3	GGCAGCTCTGCTCGGAAAGA
1624	ACKR3	GCAGCCCGGAGGTAAGGAAA
1625	ACKR3	GAAGCAAAACAGGTAAACAG
1631	ACKR3	GGTGAGTGCGGAACAAGTCT
1632	ACKR3	GCCCGGTGGAAACACAGAGT
1633	ACKR3	GGCCCGGCCGTGCGTGAGTG
1634	ACKR3	GTCCGCACTCACGCACGGCC
1635	ACKR3	GAGGACAGGCCCCGGAGTCA
1641	ACKR4	GTCTGCCGACTACAACAGGT
1642	ACKR4	GCCTCTCTGCCGACTACAAC
1643	ACKR4	GTGTCTATATATCTGCCGGA
1644	ACKR4	GAACAAAAGTAGCTGGAGTT
1645	ACKR4	GAAGTTTTACCGACAAGTAA
1651	ACLY	GCCGGTAGCTTCCCGGGATC
1652	ACLY	GCGGAGGCAGGAAGCTCCTA
1653	ACLY	GGGCGCGCCTCACCCCTCCC
1654	ACLY	GCGATAGCTGTGCCCGGGAG
1655	ACLY	GCTTCGGCAGAGGTGAGCAC
1661	ACMSD	GGAGACCTTTGTGAAAACTG
1662	ACMSD	GAACTCCACAGTTTTCACAA
1663	ACMSD	GAATGGACCTAGACTGGGTT
1664	ACMSD	GGCGAGGGGGTTAAATCATT
1665	ACMSD	GTATTTCTGAAACTTCTCCA
1671	ACN9	GGTGGGGCGCTATGCCGGGG
1672	ACN9	GGGACACCGAGGAACCCCAA
1673	ACN9	GCCAGGGATTTGAGGTCCGG
1674	ACN9	GCGGCACGTTTCTCGAGTCC
1675	ACN9	GGCTCTAGTGAGAAACCCGT
1681	ACO1	GGCGAACCTGACCCAAGCAG
1682	ACO1	GAGCCCCGCCGTGCAGTCGG
1683	ACO1	GAGGGTGTGCGGCCAGTCCT
1684	ACO1	GCTGGGAGTCCTAACCCCGA
1685	ACO1	GGTGCGGGCCTCACACCCTC
1691	ACO2	GTGAGGACAAGGTGACTAGG
1692	ACO2	GCAGCCGCCGGCACAGTAGG
1693	ACO2	GCCGGGGACGCCTTGACCTA
1694	ACO2	GCCCGCCCCCGTGAACCCAG
1695	ACO2	GGAGCGAGCTCAGGGACCTC
1701	ACOT1	GCAGCCCGAGAGGAAGAGTT
1702	ACOT1	GGAGTTGGGCAGAGTTGCAG
1703	ACOT1	GAGCAGGAACCCAAATAATC
1704	ACOT1	GGCTTGCTGGCTCGCGGAAT
1705	ACOT1	GGGCCAGGACTGGTTCGTCC
1711	ACOT11	GGTGACCAGCTTGTGTCTCT
1712	ACOT11	GGACTCCAAATGAAGCCTGT
1713	ACOT11	GTCTGGATCATCGCGCCGGG
1714	ACOT11	GTCATCGCGCCGGGTGGCCG
1715	ACOT11	GGGGCTGTCAGATCCCCCAC
1721	ACOT11	GCTGCGGGCAGGCTGAAGGG
1722	ACOT11	GCTGGGCTCGGGGACCTCGG
1723	ACOT11	GTGGCTCCGGAGAAGACCTG
1724	ACOT11	GAGCCAGAGGCGGGAAGCTG
1725	ACOT11	GTCCGCAAATGAGTCAGCAG
1731	ACOT12	GCCTGCGCAGCCAGGGATAG
1732	ACOT12	GAACCCCGCAGAAGCTCTCT
1733	ACOT12	GAGCGCTCTCGCCCTGGCCA
1734	ACOT12	GTGGGCATGGCCGAGACCGG
1735	ACOT12	GGTGCGCCGGCTGGATGGCT
1741	ACOT13	GCGGCCTCTTGCGCTCCTAG
1742	ACOT13	GGCGCAAGAGGCCGGGAGTC
1743	ACOT13	GAGCAAATCGCGGACCACCG
1744	ACOT13	GGTTCTTGCGCAAAGCCCAA
1745	ACOT13	GCTAGGGGCGGAGAAGGGTG
1751	ACOT2	GTCAGAAGCTTGCTGGCCTG
1752	ACOT2	GAGCGTCCCGGCTGTACCAA
1753	ACOT2	GCCTGAGAACAACTGAATGG
1754	ACOT2	GGCGGCTGCTGTGCCAGACG
1755	ACOT2	GGTACAGCCGGGACGCTCGA
1761	ACOT4	GTGACATCTTGGAGCCGGAG
1762	ACOT4	GGCCGGAGCGGGGAATTCAA
1763	ACOT4	GGCCACTCTACCAAAATAGA
1764	ACOT4	GAAAGGCTTCTCGGGTTCCA
1765	ACOT4	GAGCGCCAAAAAGGCTTCTC
1771	ACOT6	GCCTTCCTGCCACAAACCAT
1772	ACOT6	GACAGAAGCCTAAGAATCAT
1773	ACOT6	GGTTGGGTTTGGCCAAAGAG
1774	ACOT6	GCTTTTTTAGAAGGAACCTA
1775	ACOT6	GAGCTGGGAACATAGCAGGG
1781	ACOT7	GGCGGCGGGCGGCTGCAGAA
1782	ACOT7	GGTCTGGGCCCGACATGCTG
1783	ACOT7	GGCCGCAGCCCCCAGCATGT
1784	ACOT7	GGGGGCTGCGGCGGCGGATG
1785	ACOT7	GTACCGGCAGATCTGGATGG
1791	ACOT8	GACCCGCTCCGCGGAAGACG
1792	ACOT8	GGCAATCTGCCGGAAGAGTC
1793	ACOT8	GGCCCTGCACACCCGCTCCG
1794	ACOT8	GCTGCCGAGCAGGGTCTCTC
1795	ACOT8	GCTGCCCTAAGCCTTCACGG
1801	ACOT9	GGGCCCCGCGCGCTAGTCGG
1802	ACOT9	GCCCGGGCTGTCCTCAGCAA
1803	ACOT9	GGAAGAAGTGGGCCACGCAT
1804	ACOT9	GCCTCAGCAAGGGCGCGGTC
1805	ACOT9	GCAGCCCGGGAGCCGGACAG
1811	ACOX1	GCTGCCTCCTAGGGTCCGGC
1812	ACOX1	GGTTCATGGCGACGACCAGC
1813	ACOX1	GAAGTAAGCACCGACCGAGG
1814	ACOX1	GGCGCCGGCCGGACCCTAGG
1815	ACOX1	GGCGAAGTAAGCACCGACCG
1821	ACOX2	GAGGCTGCGGCCTACAGCCG
1822	ACOX2	GCGGCCTACAGTGCGGACAC
1823	ACOX2	GGGAGGACAGGGAATGCCGG
1824	ACOX2	GGCGGCCTACAGCCGGGGAG
1825	ACOX2	GAGTGCGGACACAGGACAGA
1831	ACOX2	GTGGTGGCCTAGAAGTGGAT
1832	ACOX2	GTTAGGGGGCCTCCACCATA
1833	ACOX2	GTGCACAGGGTTGGTCCCTA
1834	ACOX2	GGAGGATGGTGGCCTAGAAG
1835	ACOX2	GGCTCAGTAAGTGGTGCACA
1841	ACOX3	GCGCGACCGACTCGGAGTAC
1842	ACOX3	GTCACCCAGCAGGCGCTCAG
1843	ACOX3	GTAGTCCCAGTACTCCGAGT
1844	ACOX3	GCAGAGACAGCTGCGCTGTG
1845	ACOX3	GTGTCGGCCCGCGACCGACT
1851	ACOX3	GAGCAGGAAAGGATCTCCAG
1852	ACOX3	GGTTGAACTGTGGAGTGTGT
1853	ACOX3	GCCTGGCAGGGGTTGAACTG
1854	ACOX3	GTGCCAGGGAAACCAAAAGC
1855	ACOX3	GCGGCGCGTTGACGTCATGG
1861	ACOXL	GGAAGTCGCCGTCCAGGTAG
1862	ACOXL	GTGCACCCGACTCTTCGTGG
1863	ACOXL	GCTCAGGGGGCCGAAGAGGT
1864	ACOXL	GGGAGAGGGCACCTCTCAGG
1865	ACOXL	GCCCTCCCCCACGAAGAGTC
1871	ACP1	GTCTGCGCGCGGGAAGATGG
1872	ACP1	GGCCTCTGCGCGCGGGAAGA
1873	ACP1	GCGGCCTAGGAACCATGAGG
1874	ACP1	GCCATTGGAGGGGAACGAGA
1875	ACP1	GCACACAAACAGCACGGACT
1881	ACP2	GTGATGGCGGGCAAGCGGTC
1882	ACP2	GAGATTACAACGGTGATGGC
1883	ACP2	GTATGTGGTGGGGACAACTG
1884	ACP2	GGCCAAGGTACAGGTAGGAA
1885	ACP2	GCAAGCTGGAACCCGCTGGG
1891	ACP5	GGACACAGGCCAGTCACCGG
1892	ACP5	GGAGGCTCTGAGAGGCTGGT
1893	ACP5	GTGGCACCATCAGCCAGGGA
1894	ACP5	GTGCCCAGCACTCACCCAGG
1895	ACP5	GGGAATAAAGGCTCAGGGAC
1901	ACP5	GACGGGACCGCAGCCTGGGA
1902	ACP5	GGCCGATCCGCCCTGCTCGA
1903	ACP5	GCAGGCGATCGCACTCCTGG
1904	ACP5	GCCGCAGGCGATCGCACTCC
1905	ACP5	GGGCGGCCCCAGCTTTAAGC
1911	ACP6	GAGACCCCGAGTGGGAACGG
1912	ACP6	GCCTGAGGGAGACCCCGAGT
1913	ACP6	GGCAGCAGCGAAGAGTCCCT
1914	ACP6	GGGCCTACCACCATGATCAC
1915	ACP6	GCTCAAGCCGCTCCCGCTGG
1921	ACPL2	GGGCCCCGCGAGCTCCCCGG
1922	ACPL2	GGCGCAAGTCCTAGGCTCAG
1923	ACPL2	GGCGAGCGCGGGGATAAAGG
1924	ACPL2	GCTGGGAGAAGGGGGCTATG
1925	ACPL2	GAATCTCGGCTGGAATCCAG
1931	ACPP	GAAACAAGAAGCCAAGGCTA
1932	ACPP	GGGGTGCAGCTCTCATGTTG
1933	ACPP	GGACTGGTGTGGCTGTCAAA
1934	ACPP	GGCTGTTTCTGGCAGGAGTT
1935	ACPP	GGTCTCTGGGAAACAATCCA
1941	ACPT	GACTCAGGAAGGCCTCGTAG
1942	ACPT	GGTACCGGCGGGAGGAGGTA
1943	ACPT	GCAGCAGGAGAGGTCCAGCA
1944	ACPT	GCCAGAGCCACGAACACCAG
1945	ACPT	GCCCATGGACCCACACAAGG
1951	ACR	GAGTGAGAGAGCCTACTGGG
1952	ACR	GCCAGGCAGTGCCAGGAGTA
1953	ACR	GGTGAAGCGATGATATCCTG
1954	ACR	GTCCAGGGCTAGGGAAAAGG
1955	ACR	GCTGGTCTTGGCAGTGTCCG
1961	ACRBP	GCTGCGGCTTGGCCCGTTAG
1962	ACRBP	GCGGCTTGGCCCGTTAGAGG
1963	ACRBP	GAGAGGCGGCTTGTGTCCAC
1964	ACRBP	GGAGAGAGGGCTGCCTGGAG
1965	ACRBP	GGAGGCCTGAGTCGAATCCT
1971	ACRC	GAGAGGCTGCAACACCAGGT
1972	ACRC	GGGTCTGGACAATTCAAGTA
1973	ACRC	GAGAGAAGTAGGGGCACCAG
1974	ACRC	GCTGCTGCCGGCCACGCCAG
1975	ACRC	GCGTCATTGCAGATAGTGGG
1981	ACRV1	GGAAGCTGTGGCCCACACTG
1982	ACRV1	GTACAGTCAGAGGGTCCCAC
1983	ACRV1	GGGTGGGACAAACCTTCATT
1984	ACRV1	GTCTGGATTTAGGAAAAGAG
1985	ACRV1	GTAATGTGCCAAGGAAAGAT
1991	ACSBG1	GTGTCTTCAGTGGAAGCCCG
1992	ACSBG1	GCATGCTGGGGTCCCCGTGT
1993	ACSBG1	GGCAATTCTGGAGCTGGATA
1994	ACSBG1	GATCCCAGGGGTATGAGCTG
1995	ACSBG1	GAAAGGCTCATCAAAGAATG
2001	ACSBG2	GCGTTCTGGAAGGTTGAATG
2002	ACSBG2	GCTCCGTCCAGCCAGGATGA
2003	ACSBG2	GGGTAGAAGGCCTGTTGTGG
2004	ACSBG2	GTGGCTGGGATGGAACGTTC
2005	ACSBG2	GCTGGACGGAGAGGGTGACG
2011	ACSF2	GCGCAGGGCAAAGCGAGCCA
2012	ACSF2	GGAGCCATGGCTGTCTACGT
2013	ACSF2	GGTGCACTCGTCCAGAGGTG
2014	ACSF2	GTCTGGACGAGTGCACTGGG
2015	ACSF2	GATCCCGACGTAGACAGCCA
2021	ACSF3	GAGTCGGGCCGGACCAGTTC
2022	ACSF3	GGCCGCGCCGGGGAAGCTGT
2023	ACSF3	GGCCGCCCGCACCTACGAGA
2024	ACSF3	GGCCCGACTCACGACCCCGC
2025	ACSF3	GGCTCCCCACCGGACACGAG
2031	ACSL1	GCGGACGAGGGCAACGTCAG
2032	ACSL1	GCGGAGCGGCCGGTCCACGG
2033	ACSL1	GGTGACAGCCGGCGGCGGAG
2034	ACSL1	GCCGCGCTTCGGCTGGGAGG
2035	ACSL1	GCGGCGGAGCGGCCGGTCCA
2041	ACSL3	GGACGAGGAGGCGTTGGACG
2042	ACSL3	GACTCGTTGCCTATGCAGAG
2043	ACSL3	GGAGCAGCGGCGAGCAGGGT
2044	ACSL3	GGACACTGCAGTTGTCTACG
2045	ACSL3	GTGCAGCTCCCGGCTCGCGT
2051	ACSL4	GACCGCGTGCCCGCTAGCGC
2052	ACSL4	GCCGGCCGGCTGCGAAGACG
2053	ACSL4	GTGCGGTGAGCGGCAGGAAG
2054	ACSL4	GGCCCTCGGGATGCGGTGAG
2055	ACSL4	GGCCCGCTAGCGCTGGGACG
2061	ACSL5	GTCAGAGCAGGGCAGAACTG
2062	ACSL5	GGGCATGACCGAGACCAGGA
2063	ACSL5	GCTCCTGACACAGGGTCTGA
2064	ACSL5	GGCCTGACATGGCCTGACTC
2065	ACSL5	GGTCAGGAGGAGCAACGGGA
2071	ACSL5	GGAGTAGAAGTGCCTGAATG
2072	ACSL5	GGCACACCAAGCCAGAATGT
2073	ACSL5	GGTGTGTCCCAGTCAGTCCT
2074	ACSL5	GCAATACAGCCAGCTGTGAG
2075	ACSL5	GGAGGGCAGAGAGTCCCATT
2081	ACSL6	GCGGCTCAAGGGGGAGGGCG
2082	ACSL6	GATTTTTAGCCCCCGCCCTC
2083	ACSL6	GGGCGGCGCGGCTACTGCTG
2084	ACSL6	GGTCTGCGGAGGGAGATATA
2085	ACSL6	GGGCTAAAAATACCCGGCAG
2091	ACSL6	GTGTGTCCATGGGTAAGACA
2092	ACSL6	GGCTCCCAGGAGGGACAAGT
2093	ACSL6	GTTCTGCAGGCGACGGGCAT
2094	ACSL6	GCCAGGAGGGACAAGTGGGG
2095	ACSL6	GTAAGGCCCTGGCATCAGGG
2101	ACSM1	GTAGCCCTGGAAGACAGCCA
2102	ACSM1	GATGCCCTGGCTGTCTTCCA
2103	ACSM1	GGCCATCCATCACTAAAAGA
2104	ACSM1	GGGCTGACCAATGGCACTAT
2105	ACSM1	GAGGGAGGGTGTCTCAGGTC
2111	ACSM2A	GAGAGAAGGATGAATCTCAG
2112	ACSM2A	GCAGCAACAGGGAGAGACGA
2113	ACSM2A	GAGTCTTAGGAGGAAACACT
2114	ACSM2A	GAGCTGCTGGCTGGAGAGGA
2115	ACSM2A	GGTTACTGTGCTCTCTTCCA
2121	ACSM2B	GAGAGAAGGATGAATCCCAG
2122	ACSM2B	GGAAGGATGAATCCCAGAGG
2123	ACSM2B	GCAGCAACAGGGAGAGACGA
2124	ACSM2B	GAGCTGCTGGCTGGAGAGGA
2125	ACSM2B	GAGTCTTAGGAGGAAACACT
2131	ACSM3	GCGTGGCAGTCTAAAGAAGA
2132	ACSM3	GCCAACACAGATGGAGATTA
2133	ACSM3	GAAGCAGATGTGAGAACTCA
2134	ACSM3	GGAGCAGTCTGACAATCCGG
2135	ACSM3	GTTAATTGAACCAGATGCGG
2141	ACSM4	GTCTGTGAGGAACGACCATG
2142	ACSM4	GGAGGAACGACCATGGGGAT
2143	ACSM4	GTGGAAGACTGAGAGATAAG
2144	ACSM4	GGGGGACACCAAGCATCTAC
2145	ACSM4	GCCAGATGAATCTAAATGTC
2151	ACSM5	GAGGTGGCTGAGGAATCCAG
2152	ACSM5	GGGAGAGGTGGGTCAGAGAA
2153	ACSM5	GGGCCTGGTGGCCACTGCAG
2154	ACSM5	GTGGGGCTGAAGTTCCCTGT
2155	ACSM5	GAGACTGAGGAAAAGGACTG
2161	ACSS1	GGGCGTGAGGCACCCACTCT
2162	ACSS1	GACTCGGAGCCTCTCGCCAG
2163	ACSS1	GCTCAGGTAGCCTGCCTAGA
2164	ACSS1	GAGAGGCTCCGAGTCCCCTC
2165	ACSS1	GCCCCTCGGGACCCAAGAGT
2171	ACSS2	GGCACCCGCCGCGACCGCAA
2172	ACSS2	GGAGGAGACGAGGGTTCCAT
2173	ACSS2	GCCCGCCGCGACCGCAAAGG
2174	ACSS2	GCTAGGAACTTGACGTGATG
2175	ACSS2	GCGCTCCGGACCCGCTCCTC
2181	ACSS3	GGGAGGAGATGAAACCGTCT
2182	ACSS3	GTCGCACACTCGGGGACCGC
2183	ACSS3	GGATGCAGGGCACTGTCCTC
2184	ACSS3	GCCGGAGAGGACCCAGGCAA
2185	ACSS3	GGGGCACTGTCCTCCGGCAG
2191	ACTA1	GGTAGCTACCCGCCCAGGTA
2192	ACTA1	GCACTTGGCGCTGTCCGCTG
2193	ACTA1	GGCGTGTGGCTCCGGAGACG
2194	ACTA1	GGGGGAAGCGAGGCTTCACT
2195	ACTA1	GCCCAACTCCTGCCCTACCT
2201	ACTA1	GGCCGGCTCCCTCTGCGGAG
2202	ACTA1	GCAGCCTGACCTGGTGTCGG
2203	ACTA1	GACGCCTCCGGCAGGACCAC
2204	ACTA1	GGACGGGAACACGGCCCTAG
2205	ACTA1	GGTCCTGCCGGAGGCGTAGA
2211	ACTA2	GCAAGCACTGTCAGGGTAAG
2212	ACTA2	GACCCTGACAGTGCTTGGCT
2213	ACTA2	GTGTGACTTATAGATTCCAG
2214	ACTA2	GGGGTAATTAAAAGAGCCAC
2215	ACTA2	GTAGTTTGGTATGATGGAAG
2221	ACTA2	GCCTTTGGCTTGGCTTGTCA
2222	ACTA2	GTATCCCCGGGACTAAGACG
2223	ACTA2	GACGGGGTAAGCCTCCACCC
2224	ACTA2	GGGGGACCCCGGTTGGAGAG
2225	ACTA2	GGAGAGAGGAGCGGAACTCC
2231	ACTB	GACGGGCGGCGGATCGGCAA
2232	ACTB	GAAGCCCGGCCAGCCGACCG
2233	ACTB	GGCGTGCGCGCTGGGACTCA
2234	ACTB	GCCCATCTCCGGAGGCCCAG
2235	ACTB	GCGGCCACCAGAAGAGGTAG
2241	ACTBL2	GGAGGCTGCACCGGGACCAC
2242	ACTBL2	GGACTGCTACGTGGGAGATG
2243	ACTBL2	GGTTCAGGGGTGCCTCGGTG
2244	ACTBL2	GGGACGATATGGAAAAGATC
2245	ACTBL2	GCATCCCATCCTCCTCACCG
2251	ACTC1	GCCGGGCGCTGACTCACCGT
2252	ACTC1	GACCAGGCGAGGAGTGAACG
2253	ACTC1	GGAAGCCGCGGAGGAGACTG
2254	ACTC1	GTCCTCGCAGGACCTCGCAG
2255	ACTC1	GTAGGGTGCCAGGTGCAAGG
2261	ACTG1	GCACCGGCAGAGAAACGCGA
2262	ACTG1	GAGAGTGCGAGAGCTGGCAG
2263	ACTG1	GGAGAAACGCGACGGCGGAG
2264	ACTG1	GCGGCAGAGAAACGCGACGG
2265	ACTG1	GACGTCCAGCTCAGGCCCCG
2271	ACTG2	GGGCAGCCCCGGAAAGGAAG
2272	ACTG2	GACCCTCGGTAAGTACTGTA
2273	ACTG2	GGCCGTACAGTACTTACCGA
2274	ACTG2	GTACTTACCGAGGGTATGAG
2275	ACTG2	GCTGGCCATGGGACATCCTG
2281	ACTG2	GGTGTGTGCACGCCAGGTGT
2282	ACTG2	GGTGCAGCGCTTACTCCTAG
2283	ACTG2	GTTGTCACACACGAGCGCGG
2284	ACTG2	GACACACACCATGTGTGAAG
2285	ACTG2	GAGGAGTAAGCGCTGCACTG
2291	ACTL10	GCCTCCCGGCCTCTGTCCTA
2292	ACTL10	GGGACTACTCCCTAGGACAG
2293	ACTL10	GGGAAGAACTTAGGCTCCGG
2294	ACTL10	GGGCAGAGCCAAAGGCTGAA
2295	ACTL10	GACAGAGGCCGGGAGGTATC
2301	ACTL6A	GGCCAGTTAGCCCTTAGGGT
2302	ACTL6A	GCGGCGCGACTCCTACCCTA
2303	ACTL6A	GCCCACCTCAGGCAACAAAG
2304	ACTL6A	GGGGTGGCGGTGGAAGTTAA
2305	ACTL6A	GTTCCACCGCCACCCACCTC
2311	ACTL6B	GGCGCAGCGGGCACTATGAG
2312	ACTL6B	GCAGCGGGCACTATGAGCGG
2313	ACTL6B	GTGCGCTGCTAGCGGCCCGT
2314	ACTL6B	GGCTGCTAGCGGCCCGTGGG
2315	ACTL6B	GTGATCCCGCCACCGCCCAC
2321	ACTL7A	GGCGGCTCTTGACAACATGT
2322	ACTL7A	GTCGCAAGGAGACATTCGTG
2323	ACTL7A	GATGGGCCCACCAAGAAGGT
2324	ACTL7A	GTTCAGGCCTTGAATCCAGT
2325	ACTL7A	GCCTGAAAGGCCTACATCAG
2331	ACTL7B	GCACCCTGAGCCGTGCCCAG
2332	ACTL7B	GGACTGCGTGCAGGACATCT
2333	ACTL7B	GAGGGAGGCAGATGGCGACA
2334	ACTL7B	GCACAGCCTAGAGCCCCCTG
2335	ACTL7B	GTGGTGAACCCGCTGAAGCA
2341	ACTL8	GTGCCACGTGCTCACAGAGT
2342	ACTL8	GGCACGAGAGCGGCTGCACG
2343	ACTL8	GGTGCTCACAGAGTAGGCTG
2344	ACTL8	GTGCAGTGTGCAGCTGAGTT
2345	ACTL8	GGCAAACGCCTGCACGAGAG
2351	ACTL9	GGTTGCGGGACGCCAGGTGA
2352	ACTL9	GGTCGTGGGTGGCCACTCGG
2353	ACTL9	GGTGCTCCCAGAGCTGACGC
2354	ACTL9	GCCGGGCTGCAGACGTTCAT
2355	ACTL9	GGCGTGGTGGTTATTGACAT
2361	ACTN1	GCTGCTACTGGCGGCGACAG
2362	ACTN1	GTGCTGGCGAAGGCTGCTAC
2363	ACTN1	GCGGCAGGCAGAGCGGGTCG
2364	ACTN1	GTCGGCTCCGGGCTCTGAAC
2365	ACTN1	GCCACGCACACTGAACTAGG
2371	ACTN2	GCTTCGCGCGGCTCCTCTCG
2372	ACTN2	GCCAGGCGTGTCGCCCCGAG
2373	ACTN2	GTCGGGCGAAGCACCAGCTC
2374	ACTN2	GTGACTGGCAAACGGACCCA
2375	ACTN2	GGCGAGAGGGCGCTTTGTGG
2381	ACTN3	GTGGGAGGAGCCTCCAGGGT
2382	ACTN3	GATGCAGCCCGAGGGTCTGG
2383	ACTN3	GGGAGGCGCTCGGAATCCCG
2384	ACTN3	GGGGGCTCCGACGGGATGGG
2385	ACTN3	GGGCTCTGAGCCAGCTGGAT
2391	ACTN4	GGAATCGCCGAGCTAGAGGA
2392	ACTN4	GAGCTGAGGCGGGAGCGGAC
2393	ACTN4	GCGGGCTGAAGCAGCTGAAG
2394	ACTN4	GGGAGGAATCGCCGAGCTAG
2395	ACTN4	GGAATTGGCGGGTCCGGGAA
2401	ACTR10	GAAGAGGGTCGCAGTCTCCG
2402	ACTR10	GGTAGAGCGGCATGGTAGTA
2403	ACTR10	GTCCCCAGGCCCTCGTAGAG
2404	ACTR10	GCTCCGCGGCCAACAAGTCT
2405	ACTR10	GGAGTCGGCGATGAGGACCC
2411	ACTR1A	GTGCGTGTCAGTGGCGCTAG
2412	ACTR1A	GCGACGGGAATCTCACACAG
2413	ACTR1A	GATAGAGCGATCGGAAATGG
2414	ACTR1A	GGACTGCGCATGCGTGTCAG
2415	ACTR1A	GATCCGGCAAGGCTAAGAGG
2421	ACTR1B	GGCTGCAGGAGGCACCGGAT
2422	ACTR1B	GACGGCGGCGGCTCCCGACG
2423	ACTR1B	GGTAGGCTGCAGGCTCGGGG
2424	ACTR1B	GGAGCCAGGGCCGAAGGACG
2425	ACTR1B	GAGGGCAGCGGCGCCGCGTC
2431	ACTR2	GGGGGCCGGGAAGACGCAAG
2432	ACTR2	GTCCCTGCCGGGCGGTCAGT
2433	ACTR2	GAAAAGTTGGGCCGAAGGAG
2434	ACTR2	GGCGAGACCGGCACTGGACA
2435	ACTR2	GCCCACCCGGAAGGGTGAGG
2441	ACTR3	GAGACCCGCCGGCCAGCGAG
2442	ACTR3	GGATTGGCGGCGGGAGACAA
2443	ACTR3	GTCCCAGGAGGGAGAAACGA
2444	ACTR3	GGAGGAGGCCGGGAAATGAA
2445	ACTR3	GGGCCGGGAAATGAATGGTG
2451	ACTR3B	GCGCCGGGCTCGCTCAGAGT
2452	ACTR3B	GTCCAGGGGCCCGGCCACGT
2453	ACTR3B	GAGCCGGGCTGCGGGTCCAG
2454	ACTR3B	GGCGCTCCCGGTGTCCCTCA
2455	ACTR3B	GTCCCTCAGGGTGTCCACCC
2461	ACTR3C	GGGTGCGGCCGGAAGCGAAG
2462	ACTR3C	GTGCCTGAGTGCGCAGGCGT
2463	ACTR3C	GGAATCCAGAGCGCCCACTA
2464	ACTR3C	GCGAGTCCGGGAGGAAATCT
2465	ACTR3C	GCAGTCCCCGCTTACCTGAG
2471	ACTR5	GACTGGGTCCGGTGCGGCAC
2472	ACTR5	GGGCACGGGCGTCGCGGAAC
2473	ACTR5	GGACGCGCGCTCCAAGATGG
2474	ACTR5	GTCCAGCACTGGGTCCGGTG
2475	ACTR5	GCTGGACGCGCGCTCCAAGA
2481	ACTR6	GACAGAGCGAGACTCCGGCA
2482	ACTR6	GCGGAAAGGGAAAACAACTA
2483	ACTR6	GTCCAACCAGGGAATCCCTC
2484	ACTR6	GACTACGGCTGCGGTGTGGT
2485	ACTR6	GCTAAGTCAGGGCCGCGCGG
2491	ACTR8	GTCTCCGGCCATAATGACCC
2492	ACTR8	GAGTCGTGGCTGCAGCGCTG
2493	ACTR8	GGCTGAGGCGAGAGGTTGGT
2494	ACTR8	GCAGCGGAGGACCCAAGCAA
2495	ACTR8	GCACGACTGCCGGGATGGAA
2501	ACTRT1	GTAGCCTACTAGCTGTACAT
2502	ACTRT1	GTACCAGTCCACGCTCAATG
2503	ACTRT1	GGGGTGTCCTGGTGGACTGA
2504	ACTRT1	GGAAGCCCTGTACAAGTATG
2505	ACTRT1	GAGGCTACCTTCAGTCCACC
2511	ACTRT2	GCTGAGGATGCAGGGCTCCC
2512	ACTRT2	GCAGCTCTCGGGGTGTCTCA
2513	ACTRT2	GCGTGGCCTGATCACAGGGT
2514	ACTRT2	GATCAGGCCACGCTCGAAAG
2515	ACTRT2	GTCGAGCGTGGCCTGATCAC
2521	ACTRT3	GAGAGCGGCTCAGAGACAGG
2522	ACTRT3	GTACCGGTGGTGATCGACAA
2523	ACTRT3	GGCTAGAGCGGCTCAGAGAC
2524	ACTRT3	GGCCGAGCCCGTAGCTAGAG
2525	ACTRT3	GAGCCGTTGTCGATCACCAC
2531	ACVR1	GGGTAGCCTAGCGGGAGAAG
2532	ACVR1	GCTGGAGCCGGGAGGACTGA
2533	ACVR1	GTGCGGTGGCTGCAGCGGAG
2534	ACVR1	GGTGGCAGGGTGGGCGTCTG
2535	ACVR1	GACTGCTGGTGGGATATGGG
2541	ACVR1B	GGCGAGCAGGAGGACAACAA
2542	ACVR1B	GGCGGCGGCGGTGGTTACTA
2543	ACVR1B	GTCCCCTCTCTGGAACACGA
2544	ACVR1B	GAGGCTCAGACTCCCCTCTC
2545	ACVR1B	GGCCCTCGTGTTCCAGAGAG
2551	ACVR1C	GAGCGCCAGTCGGATTGAGG
2552	ACVR1C	GGGTTGGCTCTAGTCAGTGT
2553	ACVR1C	GGCGCACCGCCAGCCGCAGG
2554	ACVR1C	GTGACGTCTGGCAGCCGTAG
2555	ACVR1C	GAGCGTGGGCACCTGACGTC
2561	ACVR2A	GGGCCAGGAGACCGAAAACG
2562	ACVR2A	GTGTCTCCGAGGAAGACCCA
2563	ACVR2A	GCCAGGCTGAGGCGACGAAG
2564	ACVR2A	GGGCTGAGGCGACGAAGAGG
2565	ACVR2A	GGGACAGTCTGGGAACTGAC
2571	ACVR2B	GTGGATACAAAGAGGCGGGC
2572	ACVR2B	GGCCGGGCTCAGGGCCGCTG
2573	ACVR2B	GGCGGCGCCGCGGAACATGA
2574	ACVR2B	GGGCGCACAGCGATCCCCAG
2575	ACVR2B	GCCGGAGGGGCCATGAACGG
2581	ACVRL1	GGGACCCCCGGGCTGAGGGT
2582	ACVRL1	GAGGAGGCTTGCAGCAATGA
2583	ACVRL1	GCGGGGGTCCTCGGTCTAGG
2584	ACVRL1	GGAGGGGAGGCCGCCCTGAG
2585	ACVRL1	GGGAAGGGGCCACCGAGGAA
2591	ACY1	GCTCGCTGGACCCTAAGTCC
2592	ACY1	GAATGGGTGCTCCTTAATGG
2593	ACY1	GACACAGCCTGTCCCCACGG
2594	ACY1	GTGACTGTGGCCTGGACTTA
2595	ACY1	GCCCAGCGCCTGAAACAGAA
2601	ACY3	GCGCCCTACCCCCGAAACAG
2602	ACY3	GGGCGGAGTGACAGCCCCAC
2603	ACY3	GCTGGGAGGCATGATCTAAT
2604	ACY3	GTGTGTGGGTAACAAAACTC
2605	ACY3	GATCCCAGTCGGCCCCATCT
2611	ACY3	GCAGCTGGTGCAGGGGTCTC
2612	ACY3	GAAGCCCAGATCCGCATCAG
2613	ACY3	GGACCCTGGCCCCGATGCAA
2614	ACY3	GAGTTAGACGCCAGTCCTGG
2615	ACY3	GTCAGGGCAAGGATGGCGGT
2621	ACYP1	GCCACGCCAACGGCTCACCA
2622	ACYP1	GTCCGGGACCACCACGCCAA
2623	ACYP1	GCGGCTGCCAGGATCACTCC
2624	ACYP1	GGCAGCCGGTGGGGAAGACA
2625	ACYP1	GGGTGGTCCCGGAGTGATCC
2631	ACYP1	GCTGGACCGAGCTGCAGAGT
2632	ACYP1	GCCTGGGCCCTAAGTAGAGA
2633	ACYP1	GGGCGGACGCCGGCATCCTG
2634	ACYP1	GGAGTTGGCCGGACACTGAC
2635	ACYP1	GACCGAGCTGCAGAGTTGGC
2641	ACYP2	GTGCTGGGTGCGGGAGTAAG
2642	ACYP2	GCTCTCCGGCTCCTCAACAG
2643	ACYP2	GGCTGAGGACCAGAAGTGGG
2644	ACYP2	GGACTGGGCGGTAGACATGG
2645	ACYP2	GGACTGCTGAGGACCAGAAG
2651	ADA	GCCGGCAGAGACCCACCGAG
2652	ADA	GCCCAGAGGGGTCAAGTCAG
2653	ADA	GGCAGAGACCCACCGAGCGG
2654	ADA	GAGCCGAGCGGCCACCGAGC
2655	ADA	GGGCCCCAGGGAAAGCCGAG
2661	ADAD1	GCAGAGCGGCCTGAAGCGAG
2662	ADAD1	GTGGGAGGTGGGAGCAACGG
2663	ADAD1	GGAGGTGGGAGCAACGGCGG
2664	ADAD1	GGGCCTGAAGCGAGAGGTTG
2665	ADAD1	GGCCCTCTATGTGGGAAGAC
2671	ADAD2	GGGCCGCCAACGAAGATCTG
2672	ADAD2	GCTCAGGGCGCTGACGACGA
2673	ADAD2	GTGACGACGACGGCAGTCGT
2674	ADAD2	GGCGAGAGCAGCGCGAGATA
2675	ADAD2	GTACTCCGTGAGCAAGGACA
2681	ADAL	GCCAAGAAGGGTCGGCACCA
2682	ADAL	GTTCCTTGGACCGCCAAGGA
2683	ADAL	GCGCCAAGGAAGGGTCTGGT
2684	ADAL	GGGACCGCCAAGGAAGGGTC
2685	ADAL	GGTCTGGTAGGAGCCAAGAA
2691	ADAM10	GTCCTCGGCCCGCCACCGAA
2692	ADAM10	GCATCCCCGCCGCCCAGGAG
2693	ADAM10	GGCCCGCCGAGCAGACTGGA
2694	ADAM10	GGCGTTGCCGGCCCCTGAAG
2695	ADAM10	GAGTCAGCCCAGCCGGCCAG
2701	ADAM11	GCGGCCAGCTGGGGACAGGT
2702	ADAM11	GTGCAGAGCTGGCCGGTCGG
2703	ADAM11	GACCCTCCCGCGCTCCGGAC
2704	ADAM11	GGCCCTAGGGCGATCCGGGT
2705	ADAM11	GGAGGAATGAGCGAGCCATG
2711	ADAM12	GGAGGTAAGTCGCCGAACTA
2712	ADAM12	GGAAGAGCGTTAGTGAGAGA
2713	ADAM12	GGTAAGTCGCCGAACTAGGG
2714	ADAM12	GGCAGCGAGCCGCCCTAGTT
2715	ADAM12	GCAGCGTGCGGTGCCCTCGG
2721	ADAM15	GGACCGCGCAGAGGATGACC
2722	ADAM15	GTCAGGTACCAGGTACCGAG
2723	ADAM15	GTCCAGCGTCCGGCACACGT
2724	ADAM15	GGGCCTCGCAGTCCAGCGTC
2725	ADAM15	GGACCCACGTGAAGCGTACA
2731	ADAM17	GGTGCAGGTGGCGTTACCAA
2732	ADAM17	GGAGGGAAAAGAGGATTGAG
2733	ADAM17	GGCGGTAGAATCTTCCCAGT
2734	ADAM17	GCTGGGGGCGTCGAGCCTGG
2735	ADAM17	GAGGTGGCGTTACCAAAGGC
2741	ADAM18	GGAAGACTGCAAGCCCACGA
2742	ADAM18	GGGATCCCAGAAGGGAGAGG
2743	ADAM18	GCAGTCTTCCAAGCTCAGTG
2744	ADAM18	GGGCTGTGGCTCCTGCGCTC
2745	ADAM18	GTTGCTTCCTCAGGACTCTG
2751	ADAM19	GGCCGGGCAGTGGGCAGGTA
2752	ADAM19	GGGAGGATAAGCCCCGAGAA
2753	ADAM19	GGGATAAGCCCCGAGAACGG
2754	ADAM19	GCTCCCAGGGCGCAGAACGT
2755	ADAM19	GAGGGACCGTGAGAAAACGG
2761	ADAM2	GTGGGTCCCAGCCGGAATAA
2762	ADAM2	GTCCCAAAAGGCCAGAGGAG
2763	ADAM2	GGGAGTATTGCCCTGTAGGT
2764	ADAM2	GGCTTGAACCTATTGACCCA
2765	ADAM2	GTAGCGCTGAGGGTCCCAAA
2771	ADAM20	GGGGAATCTGAGATTGATGT
2772	ADAM20	GAGCAGTGTGTTTAAGACTA
2773	ADAM20	GCTGCTGAACTCCCATCCAA
2774	ADAM20	GCAGAATGATTCCACTTACG
2775	ADAM20	GAGACACAAGACTTGGTACT
2781	ADAM21	GAGCTGAGGCCACAGAACAA
2782	ADAM21	GACAAACCATTGATAAAGCA
2783	ADAM21	GGGTATCCAGAGTAGTCCAC
2784	ADAM21	GGAGACTTCACATTATCCAG
2785	ADAM21	GATTATCCAGTGGACTACTC
2791	ADAM22	GGGCGCTGCAACCTCCACCG
2792	ADAM22	GCAGCACTGAGCCGCGGTGG
2793	ADAM22	GCTCAGGCGTATTGAAAAGG
2794	ADAM22	GTGGAGGCGCGCAGATGCAC
2795	ADAM22	GCCCGCGCACTCGGGAAATG
2801	ADAM23	GGCCGCTTCAGCGACTGCGG
2802	ADAM23	GCAAGGCTGCAGCCCGCCAG
2803	ADAM23	GGCGCCGCCTCAGCATCCTC
2804	ADAM23	GGCCCCCGCAGTCGCTGAAG
2805	ADAM23	GGGACGAGAAGCAGGCGGCA
2811	ADAM28	GCGCTCAGGTGGGTGCTGCT
2812	ADAM28	GTGTACCTGCAACAGAGAGG
2813	ADAM28	GGGAGACCTTGCAACATGCT
2814	ADAM28	GTCTGCTCTTCTCGCTCAGG
2815	ADAM28	GCAACATGCTGGGTGATTCC
2821	ADAM29	GTGTGTAAAGAGTACAGGTA
2822	ADAM29	GTGTGATCGAGGGCGTCCTC
2823	ADAM29	GATCCACTAACCAAATGGGG
2824	ADAM29	GATAACCTGCTTGTGATCGA
2825	ADAM29	GTGTTCCTGCACATTTCCTG
2831	ADAM30	GACCGAGCCCTGGGAGGCTA
2832	ADAM30	GCCCCTGGCAGGGTTTCCGG
2833	ADAM30	GGCCAGCTAGACCGAGCCCT
2834	ADAM30	GGCTCAAAACCCGGCTCCCC
2835	ADAM30	GTGAGCTCAGGCGCCTCTAG
2841	ADAM32	GCGGATGGAGAAGCGACTCA
2842	ADAM32	GGGCCAGCAGCAACCAGAGG
2843	ADAM32	GCCAGAGGCGGAACATGGTG
2844	ADAM32	GGCAATTCCCGACTTCCCAA
2845	ADAM32	GTTAGCGTCCGGAACACGAA
2851	ADAM33	GGGGTCCCCCGAGCTCTCCG
2852	ADAM33	GGCAGGAGCGGGTCACACGG
2853	ADAM33	GATGGCTCCCTCCCCCTCGG
2854	ADAM33	GGGAGCTCACAGCTATGGGC
2855	ADAM33	GGGAGCAGGAGCGGGTCACA
2861	ADAM7	GCCCTGCAGTGGAAGTGAGG
2862	ADAM7	GCATCCCTGCAGTGGAAGTG
2863	ADAM7	GAAGCACCTCACAGATAGGT
2864	ADAM7	GGATGAAGCACCTCACAGAT
2865	ADAM7	GTTCTGAGTGATTCTGGTAG
2871	ADAM8	GCTCCTCGGCTAAATAGTGG
2872	ADAM8	GAGGCCGCGCATGGCCGGGT
2873	ADAM8	GAGCCCCGCGGGACACGGTC
2874	ADAM8	GTCCCCGACCCGGCCATGCG
2875	ADAM8	GTCCCTCCTCGGCTAAATAG
2881	ADAM9	GTCCATCGAACAGGACACGG
2882	ADAM9	GGCGCTTCCCGGCCAGACTT
2883	ADAM9	GCCTGCCGGGGCCCCAAGTC
2884	ADAM9	GGTGGGCCCAGTCCTCGGTG
2885	ADAM9	GCGGCAGGGTTGGAAAATGA
2891	ADAMDEC1	GGGCAGCAGGACCCAAGACA
2892	ADAMDEC1	GGAACAATGAGCCAAAGTAC
2893	ADAMDEC1	GAGCAGGACCCAAGACATGG
2894	ADAMDEC1	GAAGATAAAACTGGACACTG
2895	ADAMDEC1	GGGTCCTGCTGCCTGTACTT
2901	ADAMTS1	GGCCAGGGTGCGCTACCGGA
2902	ADAMTS1	GGAAAGCGGCTCCGAGCCAG
2903	ADAMTS1	GCTACGAGCGGTGTCTCCTG
2904	ADAMTS1	GGGTGCGCTACCGGACGGAG
2905	ADAMTS1	GTGCGCCTTCCGAACCCCTC
2911	ADAMTS1	GCAGTGGTCGCCGCAGGACC
2912	ADAMTS1	GACTGAGGGCGAGGACGAAG
2913	ADAMTS1	GACCCGGCACTGCAAGGCGT
2914	ADAMTS1	GGAGCGCAGGATGCACGCAC
2915	ADAMTS1	GCTTGCAGTGCCGGGTCCTG
2921	ADAMTS10	GGCGCGGGGCGGCGAGACAG
2922	ADAMTS10	GCCGGGCGCGGCGCAGGTAG
2923	ADAMTS10	GCAACCCCGGGCGTGATCAG
2924	ADAMTS10	GCGGGGCGGCGAGACAGCGG
2925	ADAMTS10	GCGCCCCGCGCGCGCAGGAA
2931	ADAMTS12	GTGCATGGTCAGGCGCGAGA
2932	ADAMTS12	GAAAAGCACAGGGAGATCGC
2933	ADAMTS12	GGAGAAAGCCTAGGCTCCTG
2934	ADAMTS12	GGGTTCGCTTCCCGGACAGG
2935	ADAMTS12	GGAAATAAAGCGCTCGCCTG
2941	ADAMTS13	GCCTCGGGCTGGCTCTCCTG
2942	ADAMTS13	GGTGACGCTGGTGCATCCTC
2943	ADAMTS13	GCAGCCCAGGAGAAAGCCAC
2944	ADAMTS13	GGACAGGCCTGCTCACTACT
2945	ADAMTS13	GTCCGCTCCACTCCTCGGGC
2951	ADAMTS14	GGTGCCAACTGCCGGCTGGT
2952	ADAMTS14	GGGCGGGCTGACCGACCAGC
2953	ADAMTS14	GTGACCGACCAGCCGGCAGT
2954	ADAMTS14	GCGCAGAGCGCACAGTGCAA
2955	ADAMTS14	GGTCCCGGAGCGTCACTGCG
2961	ADAMTS15	GGGGACCCCGCCAGTAGTAG
2962	ADAMTS15	GACCCCGCCAGTAGTAGCGG
2963	ADAMTS15	GGCAGCCGAGAACTAGCGGA
2964	ADAMTS15	GTGTCCGGGTCCAGTCGGAT
2965	ADAMTS15	GGACTGGACCCGGACATTAA
2971	ADAMTS16	GAGGTGAAGAGACTCAACCT
2972	ADAMTS16	GGAGACTCAACCTCGGACAC
2973	ADAMTS16	GTCCATGTGGAAGTCGTGCC
2974	ADAMTS16	GCCTTCGGCTGAAAGGCTCC
2975	ADAMTS16	GACAGCGCAAGCCCCAGGTA
2981	ADAMTS16	GGGCAGGGAGGACCCGACCC
2982	ADAMTS16	GGAGATTACGAGCTGCTAAA
2983	ADAMTS16	GCCCGACCCAGGCAGAGCGC
2984	ADAMTS16	GAGGTGCCTGCGGAAAACAG
2985	ADAMTS16	GCGGCCGGCAGCGTGCGAGC
2991	ADAMTS17	GGCAGGAGCGCGCTAGGCGG
2992	ADAMTS17	GCACACATGGTACCCGGGAC
2993	ADAMTS17	GGAAGCAGGAGCGCGCTAGG
2994	ADAMTS17	GGCAGCACGGGCAGGACGAG
2995	ADAMTS17	GTCGCCGCCACGGTCCGGGG
3001	ADAMTS18	GGACAGACGCACAGACGGGC
3002	ADAMTS18	GGACTGGAGCGCAAACGGTT
3003	ADAMTS18	GCCCGCTGCGATGTGAACGG
3004	ADAMTS18	GCTCTCGGAGCTCCGCTCGG
3005	ADAMTS18	GGCGGAGCTCCGAGAGCGGG
3011	ADAMTS19	GTCCAGCGCGATCCACTCCG
3012	ADAMTS19	GGATCCACTCCGGGGCGCAG
3013	ADAMTS19	GCCGGCCTCCTAGCGCTCCG
3014	ADAMTS19	GAGACCGCGAACGTACGGGT
3015	ADAMTS19	GGCCGCGGGAGCGCAGTATG
3021	ADAMTS2	GGCCGCCCAGCCCACATCTG
3022	ADAMTS2	GCCGCAGCTGCAGCACCGCA
3023	ADAMTS2	GCCCGGCCCAAGGCGCTCGG
3024	ADAMTS2	GGCGTCGTCCAGCCTGACTT
3025	ADAMTS2	GCGCCGCCGACCCCCCAGGT
3031	ADAMTS20	GTGCAGGTCGCGGGGACGAG
3032	ADAMTS20	GGCCTTCAGCGGCTAAGTGG
3033	ADAMTS20	GCCCCAGGGTGGAACCATGT
3034	ADAMTS20	GCACCGCGAGACGCCTTCAG
3035	ADAMTS20	GCCTCAGAAACTCTCTGCTC
3041	ADAMTS3	GGGTTCCCCGGAGCACAGCA
3042	ADAMTS3	GGTTAGCGCGGAGAATGCTT
3043	ADAMTS3	GAGCGAGAGAGACGAGCGAG
3044	ADAMTS3	GGGAGAATGCTTGGGTTCCC
3045	ADAMTS3	GGACTCCGCCGCACACGCAG
3051	ADAMTS4	GGAGGGACTGAGGCCGTCTA
3052	ADAMTS4	GAGGCTGGGGAGAACCCACA
3053	ADAMTS4	GTGTCTGTGGGTCTCCCTGT
3054	ADAMTS4	GTGCGAGCCTGTCTGGGACA
3055	ADAMTS4	GGCTTGGGAGAGGTGCCCAG
3061	ADAMTS5	GGCCCGCCGTCATCCCCAGT
3062	ADAMTS5	GCGTGCTCCAGAAAGAGGTG
3063	ADAMTS5	GGCGCTGTGAAGATGCGAGG
3064	ADAMTS5	GCGCTCGCAGCTGCCGACTG
3065	ADAMTS5	GAGCTGCCGACTGGGGATGA
3071	ADAMTS6	GGGGCCGGTAGTGAGATCTA
3072	ADAMTS6	GACATGTGCAGAGCATCAAA
3073	ADAMTS6	GTAGCCCTAGATCTCACTAC
3074	ADAMTS6	GTGGCTGCAGAATAACTGGC
3075	ADAMTS6	GCCGGGTTAGCCAGACCATA
3081	ADAMTS7	GCTCGGTCCGCGGGCAACAA
3082	ADAMTS7	GGCCGGCGCGGGGTCCACAA
3083	ADAMTS7	GGGAAGACGCGACCAACTCC
3084	ADAMTS7	GGGGACAAAACCGAGACTGG
3085	ADAMTS7	GGCGCAGCCGAACGGAGTCG
3091	ADAMTS8	GCGCTGCCGGGCAACCGCGT
3092	ADAMTS8	GACCCCGGGAAGCACCGAGT
3093	ADAMTS8	GGCCCACTCGGTGCTTCCCG
3094	ADAMTS8	GGCGCTAGGAAGCTGTCGTC
3095	ADAMTS8	GCAGGAGCGGAGGCCACCGG
3101	ADAMTS9	GCACGGCCGCCGCGGCGTCT
3102	ADAMTS9	GGCGTCTGGGCTCCCCATCT
3103	ADAMTS9	GGGCGGCCGTGCGCAAGGAC
3104	ADAMTS9	GCTGCCCAGGAGCGAGGACC
3105	ADAMTS9	GCGCATAATGCCCAGCGAGC
3111	ADAMTSL1	GTCCTTGCCGGAATCAGAAT
3112	ADAMTSL1	GGGAGTGTTAGCACCAGTAC
3113	ADAMTSL1	GCTGCTGTCACATCCAGTAC
3114	ADAMTSL1	GGAGCTGAGGACTGTATATA
3115	ADAMTSL1	GCAACAGCACCCAGACTCAA
3121	ADAMTSL2	GTCCCGGGAACCCCCTCTCT
3122	ADAMTSL2	GTCCAAGAGAGGGGGTTCCC
3123	ADAMTSL2	GGTCTGCCTGACAGCTATAA
3124	ADAMTSL2	GGCGGCTGGCGGCAGCAGAG
3125	ADAMTSL2	GACAGAGCTCCGGGCGCACA
3131	ADAMTSL3	GGCGCAGGGCGGCCCCTCAG
3132	ADAMTSL3	GCAACACCTCGTGCGGAATC
3133	ADAMTSL3	GTTCCGCACGAGGTGTTGAC
3134	ADAMTSL3	GCGCACGAGGTGTTGACGGG
3135	ADAMTSL3	GCCCCAGAGGGAGTAAGACT
3141	ADAMTSL4	GGAGCACCCTCCTAGAGAGA
3142	ADAMTSL4	GTTGCCTGGAGAGAGCGCCT
3143	ADAMTSL4	GGCGCCCAGGCGCTCTCTCC
3144	ADAMTSL4	GCTGCTCTGCGAGCCCCCGG
3145	ADAMTSL4	GAGGCAACCTCGCTCCGCGG
3151	ADAMTSL5	GCCGGAGAAAGTGGGAGGAT
3152	ADAMTSL5	GTTCCCCCGGAGAAAGTGGG
3153	ADAMTSL5	GTACCGGCTGCGCGGAGCCC
3154	ADAMTSL5	GGATAGGCAGATGGACTTAC
3155	ADAMTSL5	GGGCTCCCTGAGCGGCCCCA
3161	ADAP1	GACCGCGGCGGAGACACGAG
3162	ADAP1	GGCGGCGGAGACACGAGCGG
3163	ADAP1	GGCGGAGACACGAGCGGCGG
3164	ADAP1	GCCGGCCCGGGAAGACGTCC
3165	ADAP1	GCCAGAGGGCGGCGGGAATG
3171	ADAP2	GGAAGAGAGCGGGACTGGAA
3172	ADAP2	GGGCGGAGCGCACGGGCCAT
3173	ADAP2	GTGTCCGGGTCCAAGCACGT
3174	ADAP2	GTGGACCCGGACACGAGAGC
3175	ADAP2	GGCAGAGCCTGGGCTCGTAG
3181	ADAR	GCTGCGCGCCGGGCCCAAGA
3182	ADAR	GCGCACTGGAAGTGGCCCCG
3183	ADAR	GTCGGCACGGGAAACTCCGC
3184	ADAR	GGGAAGTGGCCCCGGGGCGT
3185	ADAR	GATTGAACCGGAGCCATCTT
3191	ADAR	GGGTAGAGAAGGCTACGTGG
3192	ADAR	GTCCCGACTGAAGGTAGAGA
3193	ADAR	GGCCGGCGAGAGGGAAACAA
3194	ADAR	GGAAGGTAGAGAAGGCTACG
3195	ADAR	GACCTTCAGTCGGGAATCAA
3201	ADARB1	GGCAGACGGGCGACCCAGGA
3202	ADARB1	GGCCGAGCGCCGGAGCAGAC
3203	ADARB1	GTCTCCCGGAGTCTACAGTG
3204	ADARB1	GAGTCTACAGTGAGGATGAC
3205	ADARB1	GTGTAGACTCCGGGAGAACC
3211	ADARB2	GGGTGCCAAACAACTAGCAG
3212	ADARB2	GCAAATGCAAGTCCAAGAGG
3213	ADARB2	GGAGGTTGCAAACCCGGGAG
3214	ADARB2	GGGCGGAGGTCCAAGCGGAA
3215	ADARB2	GGAGGAGGCGGAGGTCCAAG
3221	ADAT1	GTCGGCTGCCAGGGGAGAAA
3222	ADAT1	GCGTTTCCTGAAGGTGGGAG
3223	ADAT1	GTGGCAGCCGCAGGACCCAA
3224	ADAT1	GGTCACGTCCGCCTTACCGG
3225	ADAT1	GAAAGGAAGTCGGCTGCCAG
3231	ADAT2	GTGGCTGGGTATGGAGGCGA
3232	ADAT2	GCTGGGTATGGAGGCGAAGG
3233	ADAT2	GCACTCAGCTACAGAGCCCG
3234	ADAT2	GAGAGTGTGTGACCACAGAA
3235	ADAT2	GAGCGGCGCGTGCTCGGTGT
3241	ADAT3	GTGGAGAACCCGAGACCTCG
3242	ADAT3	GGCGCTTACCTGAGGGATCC
3243	ADAT3	GGCTCGCGCCCGGATCCCTC
3244	ADAT3	GGGGCCGCGCGCTTACCTGA
3245	ADAT3	GCGGGCCGGTTGCTAAGACT
3251	ADAT3	GAACAAACGACCCAGAGAGG
3252	ADAT3	GCGGCAGCTGCCTCCTCTCT
3253	ADAT3	GGACCAGGCAGTGCATGTCG
3254	ADAT3	GCATCTGTGGGGCGCCCCGG
3255	ADAT3	GGGCCCGCCGCGCCCTTGGA
3261	ADC	GGCCCGGGGAAGCGAGAGAG
3262	ADC	GCGGGGAAGCGAGAGAGCGG
3263	ADC	GCGAGGCCTCTGCTGACAGG
3264	ADC	GCGGCCCATAGGTCTCCCCA
3265	ADC	GAGGGAGTGAATCGGATCCT
3271	ADCK1	GGGTGGCCCTGTGAGTTCCG
3272	ADCK1	GCTTCCCTCGGGGTGAGTAG
3273	ADCK1	GGTCTTGCAGGCACCCGAGT
3274	ADCK1	GGCTGCCCCTACTCACCCCG
3275	ADCK1	GCCGCGGCTCTGCTTCCCTC
3281	ADCK2	GGGCCAGTATGAGATCGCTG
3282	ADCK2	GTGCGACAGGCAAACCCTGA
3283	ADCK2	GCCCTGGCGCGTCTCCGTCA
3284	ADCK2	GCCCGAGCGGGACCTCTGGG
3285	ADCK2	GGGCCCGCCCTCCACTTCAG
3291	ADCK3	GCGGCAGCGGGAAGGCGGTC
3292	ADCK3	GGGCGGCTAGAAGGTGACCG
3293	ADCK3	GCGCGGTGGCCAGCGCGCAG
3294	ADCK3	GCCCACTGCGTCCGGACCTG
3295	ADCK3	GCAGCGCGCAGAGGCGGGCG
3301	ADCK4	GGCGGCCAGGTATGCATCTA
3302	ADCK4	GGGTGCCCTAGATGCATACC
3303	ADCK4	GCCGCGCTTCGGATGCTCAG
3304	ADCK4	GGAGGGTGGTTTAGTCACAG
3305	ADCK4	GAGCTGCAAGCAAAGGGTAG
3311	ADCK5	GGGGCCGGGAGAGTCCTCAC
3312	ADCK5	GGCTAAGTGACAGGGACCAA
3313	ADCK5	GGGAGCAGTGGTCGGAGATG
3314	ADCK5	GAGAAGAGCGGAGCAGTGGT
3315	ADCK5	GCCTGGGAAGGTCTCCCCAT
3321	ADCY1	GGAACAGCGCCTCCAGCTCT
3322	ADCY1	GAGCAAGGCATAGGACACGA
3323	ADCY1	GTGGCCAGCAGGCTGCGCAC
3324	ADCY1	GGGAAGAGGACGCAGTGCAC
3325	ADCY1	GGCCAGCGACCGCCGAACAA
3331	ADCY10	GGGTCAGCTATAGACAGACA
3332	ADCY10	GAGAGCCCCCTTCAAGAGGT
3333	ADCY10	GTGCCAGAGCCCCCTTCAAG
3334	ADCY10	GATGTAAGGGACTGACACAG
3335	ADCY10	GCCTTCAAGAGGTAGGCACT
3341	ADCY2	GCCTGTGAGCGGCCCCGATG
3342	ADCY2	GTCCTGCTGCTCATCGTCAT
3343	ADCY2	GAGCCCGAGCGCGAAGAAGA
3344	ADCY2	GGCTGGCCGGGCTCCTCTCA
3345	ADCY2	GGCAGCAGGAAGACGATGAG
3351	ADCY3	GAGCCGAGCCAGCCGAGTCC
3352	ADCY3	GTCAGGCCCGGGATCCGACC
3353	ADCY3	GCCCTGGGGCTGAGGCTCAG
3354	ADCY3	GGGCGCCCGCGGATGCTGAG
3355	ADCY3	GAGCCAGCCGAGTCCGGGCT
3361	ADCY4	GCAGCGGAGTGGGCTAGGTC
3362	ADCY4	GGGCGCTGGCGCAGCGGAGT
3363	ADCY4	GGAGTGGGCTAGGTCCGGGG
3364	ADCY4	GCGGGCCGAAGGAGGTAACC
3365	ADCY4	GGCTCCCAGCTGGCGATGAG
3371	ADCY5	GCGGCCGGCGCGGAACGACT
3372	ADCY5	GCTGCGTCGGGGCAGAACCG
3373	ADCY5	GGATGCGGAGGGCTCTCCGG
3374	ADCY5	GGGCGGCGAGCGGGCGAGAA
3375	ADCY5	GCCGGCGCGGAACGACTAGG
3381	ADCY6	GCCCGGAGGCCAGGAGGATC
3382	ADCY6	GGAACTCGCCCCGTGGAGGG
3383	ADCY6	GCTGGAACTCGCCCCGTGGA
3384	ADCY6	GTGCGCTGGACAGCTCGGGA
3385	ADCY6	GCAGCCTGGAACTCGCCCCG
3391	ADCY7	GCCCAGGCTCACCCATCCGA
3392	ADCY7	GCCTGGGCGCGTCTGAGGAA
3393	ADCY7	GGTGGAAGGAGCCTTCGGAT
3394	ADCY7	GGTGAGCCTGGGCGCGTCTG
3395	ADCY7	GGTAGCGTGGAAGGAGCCTT
3401	ADCY8	GCCTGGCCGGCGGTGACCGG
3402	ADCY8	GGGTGACCGGCGGCAGCGAT
3403	ADCY8	GGCGCAGCTTGGGTACGCAG
3404	ADCY8	GCCTGCAGCCGCGGAGCAGT
3405	ADCY8	GGCGCAGGGCTCCTGCAACG
3411	ADCY9	GCGCGGCCGCTGCCTCATGT
3412	ADCY9	GGCGCGTCTGTCAGTGACAG
3413	ADCY9	GCGGCAGCTCTTCCGACATG
3414	ADCY9	GGACCGAGCGCGTGGAACCA
3415	ADCY9	GGACCCGGAGCAGCGAGCTT
3421	ADCYAP1	GGAAGGGGGCGCAGAGAGAG
3422	ADCYAP1	GACCAGGAGGGAGCGTGACA
3423	ADCYAP1	GTGGCCCGCGGCTCCTACAA
3424	ADCYAP1	GGCTGGAGTCACCACCCGAG
3425	ADCYAP1	GTGGCCGTAAGTCCACCCGG
3431	ADCYAP1R1	GAGACGGCCGAGGCGTGGAG
3432	ADCYAP1R1	GAGACCGCCAAGCCAGAGGA
3433	ADCYAP1R1	GCTGGGCGAAGGTTCTGGAG
3434	ADCYAP1R1	GCCCCGCAGTGAGCAGGTAA
3435	ADCYAP1R1	GGCCCTCGCCCGCTCTCCGT
3441	ADD1	GCAAGCCGGCCAGGAACGAG
3442	ADD1	GTCATCGGGATAGGACCCCG
3443	ADD1	GCGCAGGCCGCACCCAGGTC
3444	ADD1	GCGGAGCCGGAGCCGACGGG
3445	ADD1	GCACCCAGGTCGGGCGGTGG
3451	ADD2	GCAGGGCTGTGAGGGACTAG
3452	ADD2	GCCCAGCCTCGTGCGGGAAA
3453	ADD2	GAACACACCGCTGCCGGCCA
3454	ADD2	GCGAGCGCGGGCTGCAGCAT
3455	ADD2	GGATGCCGCGCAGGAGGTAA
3461	ADD3	GCGCAGAGCCCCAGAGGGTA
3462	ADD3	GGCGAGCCGCCAGCCCGTAA
3463	ADD3	GTAACGGTCGCCAGTGTGAG
3464	ADD3	GGCCAGTGTGAGGGGCGGGA
3465	ADD3	GAAGCGTCGGGCCCACCCGG
3471	ADGB	GGCAGAAGCCGATCTATGTA
3472	ADGB	GCCTGCAGCAAACTGTGCCA
3473	ADGB	GCTATGAAGAAGAGGAGGGG
3474	ADGB	GCCCAAAGCAAGAAAATCAG
3475	ADGB	GTCTTCTTCATAGCCCTCTC
3481	ADH1A	GGGAGACTGGTGAGTCCTTG
3482	ADH1A	GTAAAGCAGGTGTATTGCAT
3483	ADH1A	GTGCTTTATGCACTTGAGCA
3484	ADH1A	GACCGCAAATGTCTTTAATG
3485	ADH1A	GTAGTAATACATTTAAATTA
3491	ADH1B	GACAAAGACTCACAGTCTGC
3492	ADH1B	GCTGACAGAAGTTTGATGAG
3493	ADH1B	GTAATAACACATTTGAATTA
3494	ADH1B	GTTCTATACATTCCTGTTAA
3495	ADH1B	GCAGTATACATTACATATTG
3501	ADH1C	GGGAGGCTGGTGAGTACTTG
3502	ADH1C	GTAAAGCAGGTATGTTGCAC
3503	ADH1C	GGGAATAAACTATCACTTTA
3504	ADH1C	GTAAAGACTTTTCTAACTTT
3505	ADH1C	GTAAATTAGAAATGATACAC
3511	ADH4	GGACACGGAACTCCCTGGGT
3512	ADH4	GATAGGACACGGAACTCCCT
3513	ADH4	GGACAGCTCATTATAGGACA
3514	ADH4	GGAATAAATTCCTGGCATAG
3515	ADH4	GTTCAAAGACAGCTCATTAT
3521	ADH5	GCCCAGCGAGCGGCTCAGAG
3522	ADH5	GCGAGGTAGGGCCCGTTGAG
3523	ADH5	GCTCAGGGCCCTCCGCTCAA
3524	ADH5	GGGGCCCTGAGTCCAAGGGA
3525	ADH5	GTCCGTGAACATGGCGAACG
3531	ADH6	GAGGCGACTGGTAGATCAGA
3532	ADH6	GCTAGTCTCTGGGCTCCTAA
3533	ADH6	GTGTGTACTACAGGCCAAGT
3534	ADH6	GTTCACTGTAGAAAGTACAA
3535	ADH6	GAGAAAGTACAAAGGTACAC
3541	ADH7	GAGCCAGACTATCTATGTGA
3542	ADH7	GTCCAAGACAAAGACAGGAT
3543	ADH7	GTCCAATGTCAGCAAGACAT
3544	ADH7	GGAGCAATTGCCCAGCTATC
3545	ADH7	GGTAGTTCAATGGGAAACCA
3551	ADHFE1	GCGGTGTAGCGACCCGAGGA
3552	ADHFE1	GCCGGGTCGCGTACTTGCTG
3553	ADHFE1	GCAAGTACGCGACCCGGGCT
3554	ADHFE1	GCTCCGCCGGCCAATCACGG
3555	ADHFE1	GTAGCAGGCAGTGGAGAGCT
3561	ADI1	GCGGCCCCTGGGTTCGAACA
3562	ADI1	GGTGCCGTGTTCGAACCCAG
3563	ADI1	GGCACCCGCACTGCGCGTCA
3564	ADI1	GGCCGCTGCCCGGCACCTGG
3565	ADI1	GGGCCGCGCTCGGAGCCCGT
3571	ADIG	GATGTGAGGTCGTTCACCAG
3572	ADIG	GCGTTCACCAGCGGCATCAA
3573	ADIG	GGGCATCAAAGGGTACTTCA
3574	ADIG	GGTACTTCATGGCGCATGTG
3575	ADIG	GCTTGCACCCCAGCTGAAAG
3581	ADIPOQ	GTTGCTCTTACCCTCTGGTA
3582	ADIPOQ	GGCTTGACCAGGTAGGGCAA
3583	ADIPOQ	GAACAGCCTGGTACTCACGG
3584	ADIPOQ	GGGTTCTGATTCCATACCAG
3585	ADIPOQ	GCCACAGACTGCAGTCAGAA
3591	ADIPOR1	GGGGAGGGCGCTGAAGATCG
3592	ADIPOR1	GCCACGGGGTGGAGATGCAT
3593	ADIPOR1	GGCTCTCTGGTCCCGATCTG
3594	ADIPOR1	GCTACATCCCGCGGCGCTGG
3595	ADIPOR1	GCGCCGCGCGTGGGGAGGGA
3601	ADIPOR2	GGAGAGCGCGATTCCAGAAG
3602	ADIPOR2	GCAGCGGCGGCGGCTACACC
3603	ADIPOR2	GGATTCCAGAAGCGGCATCG
3604	ADIPOR2	GCGCCGGACTCCTCCGACAG
3605	ADIPOR2	GAGAAGCGGCATCGCGGCGG
3611	ADIRF	GCCGAAGCCATGGCAAGCAA
3612	ADIRF	GTCCTCCACTGAGACGCAGG
3613	ADIRF	GGAGGGTGAAGGTCCAGGAC
3614	ADIRF	GACCGAACCAGGGACCGAAG
3615	ADIRF	GCAGGGAGGCAGCGGAACAG
3621	ADK	GCGATGCTCTACGTCCGCTC
3622	ADK	GCCAACACGAGGGGGACCAG
3623	ADK	GGCTCAGGCACTCAGCGACT
3624	ADK	GGTACCTGCTGCTGCCCGAG
3625	ADK	GTACCACAGCAACTGCTTCC
3631	ADK	GTGGGCTGTAGAGCCAAAGT
3632	ADK	GCTGTAGAGCCAAAGTGGGG
3633	ADK	GGCCATCCCCCGGGAAGAGA
3634	ADK	GGGACCGGAGCAGCGTCTGT
3635	ADK	GGCTCCGGTCCGACCCTCCG
3641	ADM	GAGCGAACCCAGGTACATCA
3642	ADM	GTGAGAAGCCCGAAGTGGCA
3643	ADM	GGGTGCAGCGGCCTCCCCTG
3644	ADM	GTAGGAAGGCGAGCGAACCC
3645	ADM	GGCGGTGTCAGCGCCTAGGA
3651	ADM2	GCGGGCCGCGACTCCGCTCC
3652	ADM2	GCCTGCCTGGAGCGGAGTCG
3653	ADM2	GAGGAGGCTGATGCAACCCA
3654	ADM2	GGGTGAGCCGGGCACGTCGG
3655	ADM2	GGAGTCCTAGCAGCAGGTGG
3661	ADM5	GCCGAGAAGGAACCAAGGAA
3662	ADM5	GGGACCCCGAGAAGGAACCA
3663	ADM5	GACCCCAGCTGAGGATTTAT
3664	ADM5	GGCAAGAGGCCTAGAGACGG
3665	ADM5	GGCCAATAAATCCTCAGCTG
3671	ADNP	GGTGGGAGAGGCGGCTTCAC
3672	ADNP	GCGTCGAGCGGTGCAGACAA
3673	ADNP	GCAGCAGCGGGGACCGAGAG
3674	ADNP	GTGTCTGCTGAGGGGAGACG
3675	ADNP	GCCTGCCCTAGCCAAAATGG
3681	ADNP2	GCTCGGAGGGGACCAGACTG
3682	ADNP2	GGACCAGTCGCGCTGGGGGT
3683	ADNP2	GGAATCCCGGGACGTTCTCA
3684	ADNP2	GGCCGGTCACGTGGGAGCGG
3685	ADNP2	GGCCCCCGCTCCCACGTGAC
3691	ADO	GACCGCAAGGGGCGGAGGAA
3692	ADO	GTGACTGGCGGCAGGTTGGG
3693	ADO	GGCGTGTTCCTGCTCAAGAG
3694	ADO	GGCGCGTGCGCGCTCAGAGG
3695	ADO	GTGTGCATGTAGGTGACTGG
3701	ADORA1	GGGCCGCGCGCGGTAGGGCT
3702	ADORA1	GGCTGGCTGGGACTCGACTC
3703	ADORA1	GGGCAGTGCCCAAAGTTCCA
3704	ADORA1	GCTGGGCTCTGGACAACGCG
3705	ADORA1	GCAGGAATCCCTGGAGCTAG
3711	ADORA2A	GGCCGGAGCCGGAGACCCAG
3712	ADORA2A	GCCAGCGGCCGCCGAGACAG
3713	ADORA2A	GCGGGGAGGGAAGGCAAGTG
3714	ADORA2A	GTCAGCCGGGGTGCTAGGTC
3715	ADORA2A	GGCTCCCCGCCCGCTACCTG
3721	ADORA2B	GGCCCCCGAGGGAGGAACCC
3722	ADORA2B	GGCTTCTGCACTGACTTCTA
3723	ADORA2B	GAGGGACACCAGGAAGTAGT
3724	ADORA2B	GCCCCGTCGGAGCTCCGAAA
3725	ADORA2B	GTGCTGGTGTGCGCCGCGGT
3731	ADORA3	GGCCTGACCAAAGAGGACAC
3732	ADORA3	GGTACTGGTGTGGCATCCAG
3733	ADORA3	GGACCAAAGAGGACACGGGC
3734	ADORA3	GACCTTAGAAGAGGCTGACA
3735	ADORA3	GATGTCCTGCCTGACCAAAG
3741	ADORA3	GGCTGTAGGACAGCTCTATA
3742	ADORA3	GTTGGACTCTGCGCCATAGT
3743	ADORA3	GCACCCCACCAGAAAAGGGT
3744	ADORA3	GGGACCTCTGGGAAGACGTC
3745	ADORA3	GGCGTTGAGGACATCTGTTT
3751	ADPGK	GGCGGAGCCGCGCAGAAACA
3752	ADPGK	GCGCGGGCTAGGAAAGGAGT
3753	ADPGK	GCGCGCGCCGAGCCCGGAAG
3754	ADPGK	GAAGAGGCGCGGGCTAGGAA
3755	ADPGK	GAGAGCAGCGGTGACGAACC
3761	ADPRH	GGCGCTGAGTGAGCTAATCT
3762	ADPRH	GCCTGGTGCCCGGAATGTGG
3763	ADPRH	GGGCTGCTGCGGGTGGACGA
3764	ADPRH	GACTGGAACGCGCGAGCGAC
3765	ADPRH	GCACACTCGGAGAGCGCCAG
3771	ADPRHL1	GCGAGGCCCTCACCACAGGT
3772	ADPRHL1	GCCGCCGAGGCCCTCACCAC
3773	ADPRHL1	GAGGCAGTGCGGTCCTTCAG
3774	ADPRHL1	GCTGATACCGCTGCTAAAAG
3775	ADPRHL1	GGGACGCTCCGCAGCTGTTG
3781	ADPRHL1	GGTTGGCTGAGTGAGCCTCA
3782	ADPRHL1	GTCTTGTAGAGCGCTAGACA
3783	ADPRHL1	GTCCTGCTGGGCCCTGAAGT
3784	ADPRHL1	GAGCGCTCTACAAGACACAT
3785	ADPRHL1	GGCTAGACACGGCTACTTCC
3791	ADPRHL2	GTCGGAAGCGCGAGAGGGAG
3792	ADPRHL2	GATAAGGCCGGAGATCGCAC
3793	ADPRHL2	GTCGGGGCGAGACGTCTATA
3794	ADPRHL2	GCGGCACGCCCGGGAGTGAG
3795	ADPRHL2	GCCCGAGCACGGGATGTTCG
3801	ADPRM	GGCTGAAAGGCCTCTGACTA
3802	ADPRM	GTAACAGCGCCACCAACGAG
3803	ADPRM	GCCAGGGGCCGGCGCACGGT
3804	ADPRM	GTTACATAGCCCGTAGTCAG
3805	ADPRM	GCGCCGGCCCCTGGGCTGAA
3811	ADRA1A	GGGAGGCGCTGGGAAAAGTG
3812	ADRA1A	GCGCAGGGCCGAGTGGGTGA
3813	ADRA1A	GGAAGATGTAAGGGAATCGG
3814	ADRA1A	GACCTGGTGGAAAAAGCGGG
3815	ADRA1A	GGAGGGGCCGGTATAAAACC
3821	ADRA1B	GGCCCAGCGAGCGCCGAAGA
3822	ADRA1B	GCCTCTAGGGCCGCTGAGAA
3823	ADRA1B	GCGTGCAGTCAGCCCAGAAG
3824	ADRA1B	GCAGTAGCCGAGCACCTCTA
3825	ADRA1B	GTCATCCCCCTGGCTATGGA
3831	ADRA1D	GCCACCGCCGGGCCCTCCGA
3832	ADRA1D	GGTGCAGGCAGCGGCCACTG
3833	ADRA1D	GGCGGTTGCAGGCCACTGAG
3834	ADRA1D	GGCCGAGAAGGGCAGTACGG
3835	ADRA1D	GGCGGCGCGGCCCCCTCGGA
3841	ADRA2A	GGATGTAAGGCGACAGACAT
3842	ADRA2A	GTAATCGCTTCGGGGATGTA
3843	ADRA2A	GCTGGGGGAAGCCAGAGAGT
3844	ADRA2A	GCCAGAACCGCAGCGTCTGG
3845	ADRA2A	GAGTCTCGCGGCGCTCCGAG
3851	ADRA2B	GCTGGGCCGGTTCTTAAAGG
3852	ADRA2B	GGTCCTGGTGGTCCATGACG
3853	ADRA2B	GCAGGCCACAGCGGCCATAG
3854	ADRA2B	GTGTGGCCTGCACGGAGTAG
3855	ADRA2B	GGGGCTGGGCCGGTTCTTAA
3861	ADRA2C	GGCAGCTCCGGCGAGCGAGG
3862	ADRA2C	GCCCGGAGCGAGCGGCGACG
3863	ADRA2C	GAGGAGGCGCCCGGAGCGAG
3864	ADRA2C	GCGTGTAAGTGCAGAGCAGG
3865	ADRA2C	GCCCTAGCCGGCCGGATGGG
3871	ADRB1	GCGAGCCGCTGTCTCAGCAG
3872	ADRB1	GAGCAGTGGACAGCGGGCAT
3873	ADRB1	GTGTCTCAGCAGTGGACAGC
3874	ADRB1	GGAGGCAGCAACGAGGCGGG
3875	ADRB1	GGGCCTCCGCAGCTCGGCAT
3881	ADRB2	GGGCAGAACGCACTGCGAAG
3882	ADRB2	GTCAGCTTGTCGGGTGCTAG
3883	ADRB2	GGCTTCTTCAGAGCACGGGC
3884	ADRB2	GCCATGGGGCAACCCGGGAA
3885	ADRB2	GGTCGGGTGCTAGGGGCTCG
3891	ADRB3	GCTCGACGGGTAGGTAACCG
3892	ADRB3	GGCAGCGGCACAGAAGACGG
3893	ADRB3	GGTCCACAGCTCGCAGCCAG
3894	ADRB3	GAGGAGTCCCATCACCAGGT
3895	ADRB3	GAGGAGGACAGCAGCACGTA
3901	ADRBK1	GGGGCCGGTGGAGCACGATA
3902	ADRBK1	GGCCCCGACTGCAGTCCCGG
3903	ADRBK1	GCCCGCCGGGACTGCAGTCG
3904	ADRBK1	GCCGAGCCGGCGCCATGGGG
3905	ADRBK1	GGCCATCAGGTAGCTCACGT
3911	ADRBK2	GCCCTCGTGGCCACCCCGAG
3912	ADRBK2	GTACGGTCGCCCTCCCCTCG
3913	ADRBK2	GGCGCGCGCAGAGCGCTAGT
3914	ADRBK2	GTCGTGGCCACCCCGAGGGG
3915	ADRBK2	GACTGAGGGGCGCTGACCGT
3921	ADRM1	GCCCGCCGGAAACCCGCGTT
3922	ADRM1	GCTGCGCCCAGAGCTGCCTA
3923	ADRM1	GGCGCCTCTCGAACGAGTGT
3924	ADRM1	GGAGGAAGAGCGAGCCCGGA
3925	ADRM1	GGACGGGTAGGGTCCTGGAA
3931	ADSL	GCCACCCTGGCGGGGTCGCA
3932	ADSL	GCGAGCAGGTAACGGATCCC
3933	ADSL	GTGGCGGCTGGAGGCGATCA
3934	ADSL	GTAACGGATCCCGGGCTGAG
3935	ADSL	GCTCGGACTGAGAACACGTG
3941	ADSS	GAGCGAACTGAACTGCTCTG
3942	ADSS	GACAGGAGGAGAGAGCCTCA
3943	ADSS	GGGATCCACTGGCCAAAATG
3944	ADSS	GGGCATCGCGCATCTCTCAA
3945	ADSS	GTGGCAGCGGCACACGATGT
3951	ADSSL1	GGAGCCAAGCCAGCATGTCG
3952	ADSSL1	GCCTGGCCGGGCCAGCGCAG
3953	ADSSL1	GGAAGGAGGGCGGTGTGTGT
3954	ADSSL1	GTGGCAGCGGCTGATGATGT
3955	ADSSL1	GCCCAGCCCGCACCTGGCAG
3961	ADTRP	GTCATGGCGAGTGCTGACCG
3962	ADTRP	GCATGTAGAAGTCTTCGTCA
3963	ADTRP	GTTAGGCTGTGACCCACAGA
3964	ADTRP	GCAAGACATTCACGGTGCCC
3965	ADTRP	GCTTTCTGGCGTCCTTCTGT
3971	AEBP1	GCGTCTGCGGGCGCCCTCCA
3972	AEBP1	GCGAGGTCCTGGCGGCTAAT
3973	AEBP1	GGCGGAGAGGGGATCGAGAC
3974	AEBP1	GAGATCGAGGAGTTCCTCGA
3975	AEBP1	GCTCTGACAGGAAGCCCTCG
3981	AEBP2	GGCCCCGCGCCGCCGAACCC
3982	AEBP2	GCGGGAGAGCTCCTCCAGGT
3983	AEBP2	GGTAGCGCCGAGAGCCTGGT
3984	AEBP2	GGGCGAGGCAGAGACGATGT
3985	AEBP2	GTCGGCCATGTCGGTGATAG
3991	AEN	GAGACCGGAAGAGACACGCG
3992	AEN	GGATCCAGGACCCTGCACCG
3993	AEN	GGGACCCCCGAGCAGAGCGA
3994	AEN	GCCGGACGCCACGTGCAGAC
[truncated: 102,536 more rows]

## Sheet: TA_WGS
Entrez ID	Symbol	Gene Info	Localization	Process	Function	# elements 1	casTLE Effect 1	casTLE Score 1	# elements 2	casTLE Effect 2	casTLE Score 2	Combo casTLE Effect	Minimum Effect Estimate	Maximum Effect Estimate	Combo casTLE Score	casTLE p-value	10% FDR
5230	PGK1	phosphoglycerate kinase 1	cytosol|membrane|extracellular vesicular exosome|	carbohydrate metabolic process|glucose metabolic process|gluconeogenesis|glycolytic process|glycolytic process|phosphorylation|epithelial cell differentiation|small molecule metabolic process|	phosphoglycerate kinase activity|phosphoglycerate kinase activity|protein binding|ATP binding|	5	-5.5	138	5	-5.5	138	-5.5	-7.9	-5	275	5e-07	1
10137	RBM12	RNA binding motif protein 12	nucleus|	None	nucleotide binding|poly(A) RNA binding|	5	-5.6	138	5	-4.8	132	-5.4	-7.6	-4.6	269	5e-07	1
8904	CPNE1	copine I	extracellular vesicular exosome|	lipid metabolic process|vesicle-mediated transport|	phosphatidylserine binding|transporter activity|calcium-dependent phospholipid binding|	5	-6.9	121	5	-4.8	125	-6.7	-9.4	-5	243	5e-07	1
29894	CPSF1	cleavage and polyadenylation specific factor 1, 160kDa	nucleoplasm|mRNA cleavage and polyadenylation specificity factor complex|	mRNA splicing, via spliceosome|transcription from RNA polymerase II promoter|termination of RNA polymerase II transcription|mRNA polyadenylation|mRNA cleavage|mRNA export from nucleus|RNA splicing|gene expression|mRNA 3'-end processing|	mRNA 3'-UTR binding|protein binding|	5	-7	131	5	-6.8	99.1	-6.9	-9.9	-6	230	5e-07	1
790	CAD	carbamoyl-phosphate synthetase 2, aspartate transcarbamylase, and dihydroorotase	nucleus|cytosol|cytosol|membrane|nuclear matrix|cell projection|neuronal cell body|terminal bouton|protein complex|extracellular vesicular exosome|	pyrimidine nucleobase metabolic process|'de novo' pyrimidine nucleobase biosynthetic process|'de novo' pyrimidine nucleobase biosynthetic process|UTP biosynthetic process|glutamine metabolic process|glutamine catabolic process|female pregnancy|lactation|embryo development|response to amine|drug metabolic process|peptidyl-threonine phosphorylation|response to caffeine|organ regeneration|response t…	aspartate carbamoyltransferase activity|aspartate carbamoyltransferase activity|carbamoyl-phosphate synthase (glutamine-hydrolyzing) activity|carbamoyl-phosphate synthase (glutamine-hydrolyzing) activity|dihydroorotase activity|dihydroorotase activity|dihydroorotase activity|protein kinase activity|ATP binding|zinc ion binding|enzyme binding|identical protein binding|aspartate binding|	5	-6.3	106	5	-5.7	104	-6.1	-8.7	-5.3	209	5e-07	1
6830	SUPT6H	suppressor of Ty 6 homolog (S. cerevisiae)	nucleus|	chromatin remodeling|transcription, DNA-templated|regulation of transcription, DNA-templated|mRNA processing|RNA splicing|regulation of mRNA export from nucleus|viral process|positive regulation of transcription elongation from RNA polymerase II promoter|regulation of isotype switching|regulation of mRNA processing|mRNA transport|regulation of muscle cell differentiation|negative regulation of hi…	DNA binding|sequence-specific DNA binding transcription factor activity|protein binding|hydrolase activity, acting on ester bonds|histone binding|poly(A) RNA binding|	5	-7.6	106	5	-6.2	101	-7.5	-10.9	-5.9	205	5e-07	1
10025	MED16	mediator complex subunit 16	nucleus|nucleoplasm|membrane|mediator complex|	regulation of transcription from RNA polymerase II promoter|transcription from RNA polymerase II promoter|transcription initiation from RNA polymerase II promoter|transcription initiation from RNA polymerase II promoter|gene expression|intracellular steroid hormone receptor signaling pathway|androgen receptor signaling pathway|positive regulation of transcription, DNA-templated|positive regulatio…	transcription cofactor activity|transcription coactivator activity|catalytic activity|receptor activity|thyroid hormone receptor coactivator activity|vitamin D receptor binding|thyroid hormone receptor binding|	5	-5.5	86.4	5	-5.2	92.1	-5.3	-7.9	-4.6	178	5e-07	1
81857	MED25	mediator complex subunit 25	nucleoplasm|	negative regulation of transcription from RNA polymerase II promoter|transcription initiation from RNA polymerase II promoter|cell death|gene expression|positive regulation of chromatin binding|positive regulation of transcription from RNA polymerase II promoter|negative regulation of fibroblast proliferation|positive regulation of cell cycle arrest|positive regulation of mediator complex assembl…	protein binding|transcription factor binding|retinoic acid receptor binding|retinoid X receptor binding|	5	-6.5	83.6	5	-5.7	95	-6.4	-9.5	-5.5	178	5e-07	1
892	CCNC	cyclin C	nucleoplasm|DNA-directed RNA polymerase II, holoenzyme|mediator complex|	regulation of cyclin-dependent protein serine/threonine kinase activity|transcription, DNA-templated|transcription initiation from RNA polymerase II promoter|transforming growth factor beta receptor signaling pathway|Notch signaling pathway|gene expression|positive regulation of transcription from RNA polymerase II promoter|	protein binding|protein kinase binding|	5	-7.2	81.8	5	-4.5	98.4	-7.1	-10.1	-4.8	176	5e-07	1
5710	PSMD4	proteasome (prosome, macropain) 26S subunit, non-ATPase, 4	proteasome complex|nucleus|nucleoplasm|cytoplasm|cytosol|proteasome regulatory particle, base subcomplex|proteasome accessory complex|	G1/S transition of mitotic cell cycle|protein polyubiquitination|mitotic cell cycle|antigen processing and presentation of peptide antigen via MHC class I|antigen processing and presentation of exogenous peptide antigen via MHC class I, TAP-dependent|regulation of cellular amino acid metabolic process|apoptotic process|DNA damage response, signal transduction by p53 class mediator resulting in ce…	protein binding|identical protein binding|poly(A) RNA binding|	5	-6.3	85.6	5	-5.3	90.8	-6.2	-8.6	-4.9	175	5e-07	1
4839	NOP2	NOP2 nucleolar protein	nucleolus|	rRNA processing|positive regulation of cell proliferation|methylation|	protein binding|S-adenosylmethionine-dependent methyltransferase activity|poly(A) RNA binding|	5	-3.9	62.2	5	-4.5	113	-4.4	-6.4	-3.9	174	5e-07	1
6829	SUPT5H	suppressor of Ty 5 homolog (S. cerevisiae)	nucleus|nucleoplasm|DSIF complex|	negative regulation of transcription from RNA polymerase II promoter|chromatin remodeling|DNA-templated transcription, elongation|transcription from RNA polymerase II promoter|transcription elongation from RNA polymerase II promoter|transcription elongation from RNA polymerase II promoter|7-methylguanosine mRNA capping|cell cycle|response to organic substance|gene expression|viral process|positiv…	chromatin binding|protein binding|enzyme binding|poly(A) RNA binding|protein heterodimerization activity|	5	-6	92	5	-4.4	83.1	-5.9	-8.5	-4.9	173	5e-07	1
123169	LEO1	Leo1, Paf1/RNA polymerase II complex component, homolog (S. cerevisiae)	Cdc73/Paf1 complex|	endodermal cell fate commitment|transcription, DNA-templated|mRNA polyadenylation|histone monoubiquitination|Wnt signaling pathway|stem cell maintenance|positive regulation of mRNA 3'-end processing|positive regulation of transcription elongation from RNA polymerase II promoter|histone H2B ubiquitination|negative regulation of myeloid cell differentiation|positive regulation of transcription from…	protein binding|	5	-6	99.9	5	-4.5	69.5	-5.9	-8.8	-5	167	5e-07	1
5685	PSMA4	proteasome (prosome, macropain) subunit, alpha type, 4	proteasome complex|cytoplasmic mRNA processing body|nucleus|nucleoplasm|cytosol|proteasome core complex|proteasome core complex, alpha-subunit complex|extracellular vesicular exosome|	G1/S transition of mitotic cell cycle|protein polyubiquitination|mitotic cell cycle|antigen processing and presentation of peptide antigen via MHC class I|antigen processing and presentation of exogenous peptide antigen via MHC class I, TAP-dependent|regulation of cellular amino acid metabolic process|apoptotic process|DNA damage response, signal transduction by p53 class mediator resulting in ce…	threonine-type endopeptidase activity|protein binding|	5	-5	95.8	5	-5.3	68.4	-5.2	-7.6	-4.4	164	5e-07	1
9790	BMS1	BMS1 ribosome biogenesis factor	nucleus|nucleolus|nucleolus|	ribosome assembly|	ATP binding|poly(A) RNA binding|	5	-4.9	99.6	5	-4	55.5	-4.7	-6.8	-3.9	154	5e-07	1
7265	TTC1	tetratricopeptide repeat domain 1	peroxisomal membrane|	protein folding|	protein binding|unfolded protein binding|	5	-4.9	94.1	5	-5.9	61.7	-5.8	-8.2	-4.5	154	5e-07	1
5202	PFDN2	prefoldin subunit 2	nucleus|nucleolus|cytoplasm|mitochondrion|Golgi apparatus|prefoldin complex|extracellular vesicular exosome|	protein folding|protein folding|cellular protein metabolic process|'de novo' posttranslational protein folding|	protein binding|unfolded protein binding|	5	-5.2	75.1	5	-5.3	76.7	-5.2	-7.5	-4.4	151	5e-07	1
81608	FIP1L1	factor interacting with PAPOLA and CPSF1	nucleus|mRNA cleavage and polyadenylation specificity factor complex|	mRNA processing|	poly(A) RNA binding|	5	-6.2	71.9	5	-4.7	78.4	-6.1	-8.5	-4.7	148	5e-07	1
4522	MTHFD1	methylenetetrahydrofolate dehydrogenase (NADP+ dependent) 1, methenyltetrahydrofolate cyclohydrolase, formyltetrahydrofolate synthetase	mitochondrion|cytosol|cytosol|membrane|extracellular vesicular exosome|	histidine biosynthetic process|purine nucleotide biosynthetic process|one-carbon metabolic process|vitamin metabolic process|water-soluble vitamin metabolic process|methionine biosynthetic process|folic acid-containing compound biosynthetic process|tetrahydrofolate interconversion|small molecule metabolic process|folic acid metabolic process|oxidation-reduction process|	formate-tetrahydrofolate ligase activity|formate-tetrahydrofolate ligase activity|methenyltetrahydrofolate cyclohydrolase activity|methenyltetrahydrofolate cyclohydrolase activity|methylenetetrahydrofolate dehydrogenase [NAD(P)+] activity|methylenetetrahydrofolate dehydrogenase (NADP+) activity|ATP binding|	5	-4	72.9	5	-4.2	73.7	-4.1	-6	-3.5	146	5e-07	1
6426	SRSF1	serine/arginine-rich splicing factor 1	nucleus|nucleoplasm|nucleoplasm|cytoplasm|nuclear speck|exon-exon junction complex|extracellular vesicular exosome|catalytic step 2 spliceosome|	mRNA 5'-splice site recognition|mRNA splicing, via spliceosome|mRNA splicing, via spliceosome|in utero embryonic development|transcription from RNA polymerase II promoter|termination of RNA polymerase II transcription|mRNA splice site selection|mRNA processing|mRNA export from nucleus|RNA splicing|gene expression|mRNA 3'-end processing|cardiac muscle contraction|	nucleotide binding|RNA binding|RNA binding|mRNA binding|protein binding|poly(A) RNA binding|RS domain binding|	5	-4.1	65.9	5	-5.1	79.2	-5	-7.6	-4.2	143	5e-07	1
6164	RPL34	ribosomal protein L34	nucleolus|cytoplasm|cytosol|cytosolic large ribosomal subunit|extracellular vesicular exosome|	nuclear-transcribed mRNA catabolic process, nonsense-mediated decay|translation|translation|translational initiation|translational elongation|translational termination|SRP-dependent cotranslational protein targeting to membrane|gene expression|viral process|RNA metabolic process|mRNA metabolic process|viral life cycle|viral transcription|cellular protein metabolic process|	RNA binding|structural constituent of ribosome|	5	-5	65.1	5	-5.1	77	-5	-7.6	-4.2	142	5e-07	1
5198	PFAS	phosphoribosylformylglycinamidine synthase	cytosol|extracellular vesicular exosome|	purine nucleobase metabolic process|'de novo' IMP biosynthetic process|'de novo' IMP biosynthetic process|glutamine metabolic process|purine ribonucleoside monophosphate biosynthetic process|response to drug|small molecule metabolic process|nucleobase-containing small molecule metabolic process|	phosphoribosylformylglycinamidine synthase activity|ATP binding|	5	-4.9	87.2	5	-4.4	53.4	-4.8	-7	-4	140	5e-07	1
51077	FCF1	FCF1 rRNA-processing protein	nucleolus|small-subunit processome|	rRNA processing|	poly(A) RNA binding|	5	-4.3	80.7	5	-4.5	58.6	-4.4	-6.5	-3.7	139	5e-07	1
9646	CTR9	CTR9, Paf1/RNA polymerase II complex component	Cdc73/Paf1 complex|nuclear speck|transcriptionally active chromatin|	negative regulation of transcription from RNA polymerase II promoter|endodermal cell fate commitment|transcription, DNA-templated|JAK-STAT cascade|histone monoubiquitination|Wnt signaling pathway|stem cell maintenance|positive regulation of transcription elongation from RNA polymerase II promoter|histone H2B ubiquitination|negative regulation of myeloid cell differentiation|positive regulation of…	protein binding|SH2 domain binding|	5	-5.8	65	5	-4.4	74.5	-5.7	-8.1	-4.1	137	5e-07	1
55656	INTS8	integrator complex subunit 8	integrator complex|	snRNA processing|	protein binding|	4	-5.4	67.6	4	-5.3	66.5	-5.4	-8.3	-4.4	134	5e-07	1
55187	VPS13D	vacuolar protein sorting 13 homolog D (S. cerevisiae)	extracellular vesicular exosome|	None	None	5	-6.3	70.2	5	-4.5	63.9	-6.2	-9.1	-5.1	132	5e-07	1
8668	EIF3I	eukaryotic translation initiation factor 3, subunit I	cytosol|eukaryotic translation initiation factor 3 complex|eukaryotic 43S preinitiation complex|eukaryotic 48S preinitiation complex|extracellular vesicular exosome|	formation of translation preinitiation complex|translation|translational initiation|translational initiation|translational initiation|regulation of translational initiation|gene expression|cellular protein metabolic process|	translation initiation factor activity|translation initiation factor activity|protein binding|	5	-5.4	68.1	5	-4.3	58.1	-5.3	-8.2	-4.2	124	5e-07	1
2623	GATA1	GATA binding protein 1 (globin transcription factor 1)	nucleus|nucleoplasm|transcription factor complex|transcriptional repressor complex|	negative regulation of transcription from RNA polymerase II promoter|in utero embryonic development|transcription from RNA polymerase II promoter|cell-cell signaling|blood coagulation|negative regulation of cell proliferation|male gonad development|regulation of glycoprotein biosynthetic process|regulation of definitive erythrocyte differentiation|erythrocyte differentiation|megakaryocyte differe…	transcription regulatory region sequence-specific DNA binding|RNA polymerase II regulatory region sequence-specific DNA binding|RNA polymerase II core promoter proximal region sequence-specific DNA binding|RNA polymerase II core promoter proximal region sequence-specific DNA binding transcription factor activity involved in positive regulation of transcription|RNA polymerase II core promoter prox…	5	-4.5	59.6	5	-4.1	65.7	-4.3	-6.3	-3.6	124	5e-07	1
3326	HSP90AB1	heat shock protein 90kDa alpha (cytosolic), class B member 1	cytoplasm|mitochondrion|cytosol|COP9 signalosome|cell surface|membrane|inclusion body|basolateral plasma membrane|apical plasma membrane|brush border membrane|melanosome|extracellular vesicular exosome|	placenta development|protein folding|response to unfolded protein|axon guidance|response to salt stress|positive regulation of protein binding|negative regulation of proteasomal ubiquitin-dependent protein catabolic process|positive regulation of protein import into nucleus, translocation|nucleotide-binding domain, leucine rich repeat containing receptor signaling pathway|Fc-gamma receptor signal…	UTP binding|CTP binding|double-stranded RNA binding|protein binding|ATP binding|GTP binding|sulfonylurea receptor binding|protein kinase binding|MHC class II protein complex binding|nitric-oxide synthase regulator activity|TPR domain binding|dATP binding|ion channel binding|poly(A) RNA binding|unfolded protein binding|	5	-4.7	65.3	5	-4.1	60.4	-4.6	-6.5	-3.7	124	5e-07	1
6138	RPL15	ribosomal protein L15	nucleus|cytosol|ribosome|cytosolic large ribosomal subunit|extracellular vesicular exosome|	nuclear-transcribed mRNA catabolic process, nonsense-mediated decay|translation|translation|translational initiation|translational elongation|translational termination|SRP-dependent cotranslational protein targeting to membrane|gene expression|viral process|RNA metabolic process|mRNA metabolic process|viral life cycle|viral transcription|cellular protein metabolic process|	RNA binding|structural constituent of ribosome|protein binding|poly(A) RNA binding|	5	-4.4	48.4	5	-4.2	75	-4.3	-6.3	-3.6	123	5e-07	1
3921	RPSA	ribosomal protein SA	nucleus|cytoplasm|cytoplasm|cytosol|plasma membrane|membrane|cytosolic small ribosomal subunit|90S preribosome|extracellular vesicular exosome|	ribosomal small subunit assembly|nuclear-transcribed mRNA catabolic process, nonsense-mediated decay|endonucleolytic cleavage in ITS1 to separate SSU-rRNA from 5.8S rRNA and LSU-rRNA from tricistronic rRNA transcript (SSU-rRNA, 5.8S rRNA, LSU-rRNA)|endonucleolytic cleavage to generate mature 3'-end of SSU-rRNA from (SSU-rRNA, 5.8S rRNA, LSU-rRNA)|rRNA export from nucleus|translation|translation|t…	structural constituent of ribosome|laminin receptor activity|protein binding|ribosome binding|laminin binding|poly(A) RNA binding|	5	-4.7	62.9	5	-4.3	60.6	-4.6	-7	-3.9	123	5e-07	1
80335	WDR82	WD repeat domain 82	chromatin|histone methyltransferase complex|Set1C/COMPASS complex|PTW/PP1 phosphatase complex|	histone H3-K4 methylation|	chromatin binding|protein binding|histone methyltransferase activity (H3-K4 specific)|	5	-4.9	57.2	5	-5	58.5	-5	-7.8	-4.1	115	5e-07	1
9045	RPL14	ribosomal protein L14	cytoplasm|cytosol|membrane|cytosolic large ribosomal subunit|extracellular vesicular exosome|	nuclear-transcribed mRNA catabolic process, nonsense-mediated decay|rRNA processing|translation|translation|translational initiation|translational elongation|translational termination|SRP-dependent cotranslational protein targeting to membrane|gene expression|viral process|RNA metabolic process|mRNA metabolic process|viral life cycle|viral transcription|ribosomal large subunit biogenesis|cellular…	RNA binding|structural constituent of ribosome|protein binding|poly(A) RNA binding|	5	-3.9	50.9	5	-4	63.1	-4	-6.1	-3.5	114	5e-07	1
9349	RPL23	ribosomal protein L23	nucleolus|cytoplasm|cytosol|ribosome|membrane|cytosolic large ribosomal subunit|extracellular vesicular exosome|	nuclear-transcribed mRNA catabolic process, nonsense-mediated decay|translation|translation|translational initiation|translational elongation|translational termination|ribosomal protein import into nucleus|SRP-dependent cotranslational protein targeting to membrane|gene expression|viral process|RNA metabolic process|mRNA metabolic process|viral life cycle|viral transcription|cellular protein meta…	structural constituent of ribosome|protein binding|poly(A) RNA binding|	5	-4.3	67.2	5	-4.4	47.2	-4.3	-6.6	-3.5	114	5e-07	1
57508	INTS2	integrator complex subunit 2	intracellular|membrane|integral component of membrane|nuclear membrane|integrator complex|	snRNA processing|	protein binding|	5	-3.5	34.2	5	-4.8	80.6	-4.7	-6.8	-3.8	112	5e-07	1
4691	NCL	nucleolin	nucleus|nucleoplasm|nucleolus|cell cortex|membrane|ribonucleoprotein complex|cytoplasmic ribonucleoprotein granule|extracellular vesicular exosome|	angiogenesis|positive regulation of transcription of nuclear large rRNA transcript from RNA polymerase I promoter|	nucleotide binding|RNA binding|protein binding|protein C-terminus binding|telomeric DNA binding|identical protein binding|poly(A) RNA binding|	10	-4.2	59.3	10	-4.5	51.5	-4.4	-6.1	-3.6	110	5e-07	1
4928	NUP98	nucleoporin 98kDa	kinetochore|nuclear envelope|nuclear envelope|nuclear pore|nuclear pore|nucleoplasm|cytosol|nuclear pore outer ring|nuclear pore outer ring|nuclear membrane|nuclear periphery|nuclear inclusion body|nuclear pore nuclear basket|	protein import into nucleus, docking|mitotic cell cycle|carbohydrate metabolic process|DNA replication|nucleocytoplasmic transport|nuclear pore organization|mitotic nuclear envelope disassembly|hexose transport|regulation of glucose transport|glucose transport|viral process|cytokine-mediated signaling pathway|small molecule metabolic process|mRNA transport|nuclear pore complex assembly|transmembr…	transporter activity|protein binding|structural constituent of nuclear pore|structural constituent of nuclear pore|peptide binding|	5	-4.4	49.5	5	-4.2	60.5	-4.3	-6.8	-3.5	110	5e-07	1
9862	MED24	mediator complex subunit 24	nucleus|nucleoplasm|mediator complex|	regulation of transcription from RNA polymerase II promoter|transcription initiation from RNA polymerase II promoter|transcription initiation from RNA polymerase II promoter|gene expression|histone acetylation|stem cell maintenance|intracellular steroid hormone receptor signaling pathway|androgen receptor signaling pathway|positive regulation of transcription, DNA-templated|protein heterooligomer…	RNA polymerase II transcription cofactor activity|transcription cofactor activity|histone acetyltransferase activity|receptor activity|ligand-dependent nuclear receptor transcription coactivator activity|vitamin D receptor binding|thyroid hormone receptor binding|	5	-6.7	54.2	5	-4.8	56.4	-6.6	-10.7	-5.4	108	5e-07	1
57647	DHX37	DEAH (Asp-Glu-Ala-His) box polypeptide 37	None	metabolic process|	nucleic acid binding|helicase activity|ATP binding|	5	-5.1	71.6	5	-3.2	38.5	-5.1	-7.5	-4	107	5e-07	1
5687	PSMA6	proteasome (prosome, macropain) subunit, alpha type, 6	cytoplasmic mRNA processing body|nucleus|nucleoplasm|cytoplasm|cytosol|proteasome core complex|proteasome core complex|polysome|nuclear matrix|proteasome core complex, alpha-subunit complex|proteasome core complex, alpha-subunit complex|myofibril|sarcomere|extracellular vesicular exosome|	G1/S transition of mitotic cell cycle|protein polyubiquitination|mitotic cell cycle|antigen processing and presentation of peptide antigen via MHC class I|antigen processing and presentation of exogenous peptide antigen via MHC class I, TAP-dependent|regulation of cellular amino acid metabolic process|apoptotic process|DNA damage response, signal transduction by p53 class mediator resulting in ce…	RNA binding|RNA binding|endopeptidase activity|threonine-type endopeptidase activity|protein binding|purine ribonucleoside triphosphate binding|NF-kappaB binding|	5	-4.6	43.4	5	-4.5	63.6	-4.6	-6.9	-3.8	107	5e-07	1
23212	RRS1	RRS1 ribosome biogenesis regulator homolog (S. cerevisiae)	condensed nuclear chromosome|nucleus|nucleolus|endoplasmic reticulum|	mitotic metaphase plate congression|ribosome biogenesis|	poly(A) RNA binding|	5	-5.4	47.8	5	-4.3	60.6	-5.2	-7.4	-3.9	107	5e-07	1
6884	TAF13	TAF13 RNA polymerase II, TATA box binding protein (TBP)-associated factor, 18kDa	nucleus|nucleoplasm|transcription factor TFIID complex|transcription factor TFIID complex|nucleolus|	DNA-templated transcription, initiation|regulation of transcription, DNA-templated|transcription from RNA polymerase II promoter|transcription from RNA polymerase II promoter|transcription initiation from RNA polymerase II promoter|transcription initiation from RNA polymerase II promoter|transcription elongation from RNA polymerase II promoter|gene expression|viral process|	DNA binding|sequence-specific DNA binding transcription factor activity|protein binding|protein C-terminus binding|protein heterodimerization activity|	5	-5.7	51.6	5	-5.6	54	-5.6	-9.4	-4.8	105	5e-07	1
55661	DDX27	DEAD (Asp-Glu-Ala-Asp) box polypeptide 27	nucleus|	ATP catabolic process|	ATP binding|ATP-dependent helicase activity|poly(A) RNA binding|	5	-4.8	59.5	5	-5	45.5	-4.9	-7.9	-4.1	104	5e-07	1
6235	RPS29	ribosomal protein S29	cytoplasm|cytosol|small ribosomal subunit|cytosolic small ribosomal subunit|extracellular vesicular exosome|	nuclear-transcribed mRNA catabolic process, nonsense-mediated decay|translation|translation|translational initiation|translational elongation|translational termination|SRP-dependent cotranslational protein targeting to membrane|gene expression|viral process|RNA metabolic process|mRNA metabolic process|viral life cycle|viral transcription|cellular protein metabolic process|	structural constituent of ribosome|zinc ion binding|	10	-4.7	37.2	10	-4.5	64.7	-4.5	-6.4	-3.9	101	5e-07	1
5682	PSMA1	proteasome (prosome, macropain) subunit, alpha type, 1	proteasome complex|nucleus|nucleoplasm|centrosome|cytosol|proteasome core complex|polysome|proteasome core complex, alpha-subunit complex|extracellular vesicular exosome|	G1/S transition of mitotic cell cycle|protein polyubiquitination|mitotic cell cycle|antigen processing and presentation of peptide antigen via MHC class I|antigen processing and presentation of exogenous peptide antigen via MHC class I, TAP-dependent|regulation of cellular amino acid metabolic process|apoptotic process|DNA damage response, signal transduction by p53 class mediator resulting in ce…	RNA binding|threonine-type endopeptidase activity|protein binding|	5	-5.2	55.8	5	-5.9	45.5	-5.8	-8.6	-4.6	100	5e-07	1
84549	MAK16	MAK16 homolog (S. cerevisiae)	nucleolus|	None	poly(A) RNA binding|	5	-4.6	77.4	5	-2.6	24.8	-4.5	-6.9	-3.6	98.6	5e-07	1
90121	TSR2	TSR2, 20S rRNA accumulation, homolog (S. cerevisiae)	None	rRNA processing|	protein binding|	5	-2.6	34.1	5	-5.4	68.6	-5.2	-7.6	-4.1	97.3	5e-07	1
55131	RBM28	RNA binding motif protein 28	spliceosomal complex|nucleolus|	mRNA processing|RNA splicing|	nucleotide binding|poly(A) RNA binding|	5	-5.5	76.5	5	-2.7	25.6	-5.4	-8	-4.4	96.9	5e-07	1
26015	RPAP1	RNA polymerase II associated protein 1	nucleus|	RNA biosynthetic process|	DNA binding|DNA-directed RNA polymerase activity|	5	-6.6	40	5	-4.6	58.8	-6.5	-10	-4.3	96.4	5e-07	1
9968	MED12	mediator complex subunit 12	nucleus|nucleoplasm|membrane|mediator complex|	neural tube closure|transcription initiation from RNA polymerase II promoter|transcription initiation from RNA polymerase II promoter|heart development|gene expression|oligodendrocyte development|Schwann cell development|stem cell maintenance|negative regulation of Wnt signaling pathway|intracellular steroid hormone receptor signaling pathway|androgen receptor signaling pathway|positive regulatio…	RNA polymerase II distal enhancer sequence-specific DNA binding|RNA polymerase II transcription cofactor activity|RNA polymerase II transcription factor binding transcription factor activity involved in positive regulation of transcription|chromatin binding|transcription cofactor activity|transcription coactivator activity|receptor activity|protein binding|beta-catenin binding|protein C-terminus …	5	-4.3	67.9	5	-3.5	29.9	-4.1	-6	-3.3	96.3	5e-07	1
65123	INTS3	integrator complex subunit 3	nucleus|integrator complex|SOSS complex|	DNA repair|cellular response to DNA damage stimulus|mitotic cell cycle checkpoint|response to ionizing radiation|snRNA processing|	protein binding|	5	-2.2	18.6	5	-4.3	81.7	-4.2	-6.4	-3.4	96	5e-07	1
51602	NOP58	NOP58 ribonucleoprotein	nucleus|nucleolus|nucleolus|small nucleolar ribonucleoprotein complex|cytoplasm|Cajal body|membrane|box C/D snoRNP complex|pre-snoRNP complex|	rRNA processing|snRNP protein import into nucleus|cell growth|	protein binding|snoRNA binding|poly(A) RNA binding|	5	-4.5	45.4	5	-4.1	51.3	-4.4	-6.7	-3.4	96	5e-07	1
80789	INTS5	integrator complex subunit 5	membrane|integral component of membrane|integrator complex|	snRNA processing|	protein binding|	5	-5.2	46.1	5	-5.1	48.4	-5.2	-7.7	-4.2	94	5e-07	1
6391	SDHC	succinate dehydrogenase complex, subunit C, integral membrane protein, 15kDa	mitochondrion|mitochondrial inner membrane|mitochondrial inner membrane|mitochondrial respiratory chain complex II|integral component of membrane|respiratory chain complex II|	tricarboxylic acid cycle|tricarboxylic acid cycle|aerobic respiration|respiratory electron transport chain|cellular metabolic process|small molecule metabolic process|oxidation-reduction process|	succinate dehydrogenase activity|electron carrier activity|heme binding|metal ion binding|	5	-3.8	34.7	5	-5.6	61.3	-5.4	-7.9	-3.5	93.1	5e-07	1
9136	RRP9	ribosomal RNA processing 9, small subunit (SSU) processome component, homolog (yeast)	nucleus|nucleolus|small nucleolar ribonucleoprotein complex|small nuclear ribonucleoprotein complex|	rRNA processing|	poly(A) RNA binding|	5	-5.5	80.8	5	-1.7	15.4	-5.4	-8.2	-3.9	89.5	5e-07	1
90390	MED30	mediator complex subunit 30	nucleus|nucleoplasm|mediator complex|	regulation of transcription from RNA polymerase II promoter|transcription initiation from RNA polymerase II promoter|transcription initiation from RNA polymerase II promoter|gene expression|stem cell maintenance|intracellular steroid hormone receptor signaling pathway|androgen receptor signaling pathway|positive regulation of transcription, DNA-templated|	RNA polymerase II transcription cofactor activity|transcription cofactor activity|receptor activity|protein binding|ligand-dependent nuclear receptor transcription coactivator activity|vitamin D receptor binding|thyroid hormone receptor binding|	5	-7.1	32.6	5	-5.1	58.3	-7	-10.6	-4.8	88.2	5e-07	1
22809	ATF5	activating transcription factor 5	nucleus|transcription factor complex|cytoplasm|	transcription, DNA-templated|regulation of transcription from RNA polymerase II promoter|post-embryonic development|olfactory bulb interneuron development|multicellular organism growth|negative regulation of apoptotic process|positive regulation of transcription from RNA polymerase II promoter|negative regulation of astrocyte differentiation|	RNA polymerase II regulatory region sequence-specific DNA binding|RNA polymerase II transcription regulatory region sequence-specific DNA binding transcription factor activity involved in positive regulation of transcription|transcription corepressor activity|protein binding|heat shock protein binding|	5	-4.3	68	5	-3.2	20.2	-4.2	-6.8	-3.4	86.4	5e-07	1
4736	RPL10A	ribosomal protein L10a	nucleus|nucleolus|cytoplasm|cytosol|membrane|cytosolic large ribosomal subunit|extracellular vesicular exosome|	nuclear-transcribed mRNA catabolic process, nonsense-mediated decay|translation|translation|translational initiation|translational elongation|translational termination|SRP-dependent cotranslational protein targeting to membrane|anatomical structure morphogenesis|gene expression|viral process|RNA metabolic process|mRNA metabolic process|viral life cycle|viral transcription|cellular protein metabol…	structural constituent of ribosome|protein binding|poly(A) RNA binding|	5	-4.4	38.1	5	-4.7	48.8	-4.6	-7.2	-3.7	86.3	5e-07	1
55090	MED9	mediator complex subunit 9	mediator complex|	regulation of transcription from RNA polymerase II promoter|transcription from RNA polymerase II promoter|	RNA polymerase II transcription cofactor activity|protein binding|	5	-4.4	34.8	5	-5.4	51.7	-5.3	-9.4	-4.4	85.4	5e-07	1
6160	RPL31	ribosomal protein L31	cytosol|membrane|cytosolic large ribosomal subunit|extracellular vesicular exosome|	nuclear-transcribed mRNA catabolic process, nonsense-mediated decay|translation|translation|translational initiation|translational elongation|translational termination|SRP-dependent cotranslational protein targeting to membrane|gene expression|viral process|RNA metabolic process|mRNA metabolic process|viral life cycle|viral transcription|cellular protein metabolic process|	RNA binding|structural constituent of ribosome|poly(A) RNA binding|	5	-4.5	50.7	5	-2.8	37.7	-4.3	-6.1	-2.7	84.9	5e-07	1
55153	SDAD1	SDA1 domain containing 1	nucleolus|	ribosomal large subunit export from nucleus|protein transport|actin cytoskeleton organization|ribosomal large subunit biogenesis|	molecular_function|	5	-4.8	44.9	5	-5	40.2	-4.9	-8	-4	84.5	5e-07	1
6224	RPS20	ribosomal protein S20	cytoplasm|cytosol|membrane|cytosolic small ribosomal subunit|extracellular vesicular exosome|	nuclear-transcribed mRNA catabolic process, nonsense-mediated decay|translation|translation|translation|translational initiation|translational elongation|translational termination|SRP-dependent cotranslational protein targeting to membrane|gene expression|viral process|RNA metabolic process|mRNA metabolic process|viral life cycle|viral transcription|cellular protein metabolic process|	RNA binding|structural constituent of ribosome|structural constituent of ribosome|protein binding|poly(A) RNA binding|	5	-3.3	36	5	-4.3	50.2	-4.1	-6.3	-3.3	84.4	5e-07	1
5688	PSMA7	proteasome (prosome, macropain) subunit, alpha type, 7	proteasome complex|nucleus|nucleoplasm|cytosol|proteasome core complex|proteasome core complex, alpha-subunit complex|extracellular vesicular exosome|	G1/S transition of mitotic cell cycle|protein polyubiquitination|mitotic cell cycle|antigen processing and presentation of peptide antigen via MHC class I|antigen processing and presentation of exogenous peptide antigen via MHC class I, TAP-dependent|regulation of cellular amino acid metabolic process|apoptotic process|DNA damage response, signal transduction by p53 class mediator resulting in ce…	threonine-type endopeptidase activity|protein binding|identical protein binding|	5	-4.4	46.5	5	-3.4	39.4	-4.2	-6.1	-3.1	84	5e-07	1
6232	RPS27	ribosomal protein S27	nucleus|cytosol|ribosome|cytosolic small ribosomal subunit|	nuclear-transcribed mRNA catabolic process, nonsense-mediated decay|mitotic cell cycle|translation|translation|translation|translational initiation|translational elongation|translational termination|SRP-dependent cotranslational protein targeting to membrane|cell proliferation|gene expression|viral process|RNA metabolic process|mRNA metabolic process|viral life cycle|viral transcription|cellular …	DNA binding|structural constituent of ribosome|protein binding|zinc ion binding|poly(A) RNA binding|	5	-4.7	50.6	5	-2.9	35.8	-4.5	-6.6	-3.1	83.2	5e-07	1
9440	MED17	mediator complex subunit 17	nucleus|nucleoplasm|transcription factor complex|membrane|mediator complex|	regulation of transcription from RNA polymerase II promoter|transcription initiation from RNA polymerase II promoter|transcription initiation from RNA polymerase II promoter|gene expression|stem cell maintenance|intracellular steroid hormone receptor signaling pathway|androgen receptor signaling pathway|positive regulation of transcription, DNA-templated|positive regulation of transcription from …	RNA polymerase II transcription cofactor activity|transcription cofactor activity|transcription coactivator activity|receptor activity|ligand-dependent nuclear receptor transcription coactivator activity|vitamin D receptor binding|thyroid hormone receptor binding|	5	-3.9	26	5	-4.1	57.5	-4	-6.1	-3	82.9	5e-07	1
80135	RPF1	ribosome production factor 1 homolog (S. cerevisiae)	nucleolus|	rRNA processing|	RNA binding|rRNA binding|poly(A) RNA binding|	5	-5.1	41	5	-4.1	42.4	-4.9	-7.4	-3.7	81.9	5e-07	1
6396	SEC13	SEC13 homolog (S. cerevisiae)	Golgi membrane|kinetochore|nuclear envelope|endoplasmic reticulum membrane|cytosol|ER to Golgi transport vesicle membrane|nuclear pore outer ring|nuclear pore outer ring|extracellular vesicular exosome|	mitotic cell cycle|antigen processing and presentation of peptide antigen via MHC class I|intracellular protein transport|ER to Golgi vesicle-mediated transport|protein N-linked glycosylation via asparagine|antigen processing and presentation of exogenous peptide antigen via MHC class II|post-translational protein modification|cellular protein metabolic process|COPII vesicle coating|mRNA transpor…	protein binding|	5	-4.5	50.5	5	-3.7	32.3	-4.3	-6.4	-3.3	81.5	5e-07	1
29889	GNL2	guanine nucleotide binding protein-like 2 (nucleolar)	nucleus|nucleolus|membrane|	GTP catabolic process|GTP catabolic process|biological_process|ribosome biogenesis|	GTPase activity|GTPase activity|GTP binding|poly(A) RNA binding|	5	-4.6	42.2	5	-5.4	40.5	-5.3	-8	-4	81.3	5e-07	1
6233	RPS27A	ribosomal protein S27a	nucleoplasm|cytosol|plasma membrane|endosome membrane|small ribosomal subunit|membrane|cytosolic small ribosomal subunit|endocytic vesicle membrane|extracellular vesicular exosome|	G1/S transition of mitotic cell cycle|G2/M transition of mitotic cell cycle|negative regulation of transcription from RNA polymerase II promoter|nuclear-transcribed mRNA catabolic process, nonsense-mediated decay|activation of MAPK activity|protein polyubiquitination|mitotic cell cycle|toll-like receptor signaling pathway|antigen processing and presentation of peptide antigen via MHC class I|anti…	structural constituent of ribosome|poly(A) RNA binding|metal ion binding|	5	-3.5	28.1	5	-4.2	54.5	-4	-5.9	-3.2	81.3	5e-07	1
1738	DLD	dihydrolipoamide dehydrogenase	nucleus|mitochondrion|mitochondrial matrix|cilium|acrosomal matrix|	pyruvate metabolic process|tricarboxylic acid cycle|mitochondrial electron transport, NADH to ubiquinone|proteolysis|lysine catabolic process|gastrulation|branched-chain amino acid catabolic process|regulation of acetyl-CoA biosynthetic process from pyruvate|cellular nitrogen compound metabolic process|regulation of membrane potential|cellular metabolic process|small molecule metabolic process|ce…	dihydrolipoyl dehydrogenase activity|flavin adenine dinucleotide binding|	4	-3.4	26.7	4	-5.3	57	-5.2	-8	-3.1	80.9	5e-07	1
7372	UMPS	uridine monophosphate synthetase	nucleus|cytoplasm|cytosol|	pyrimidine nucleobase metabolic process|'de novo' pyrimidine nucleobase biosynthetic process|UMP biosynthetic process|female pregnancy|lactation|cellular response to drug|'de novo' UMP biosynthetic process|small molecule metabolic process|pyrimidine nucleoside biosynthetic process|nucleobase-containing small molecule metabolic process|	orotate phosphoribosyltransferase activity|orotate phosphoribosyltransferase activity|orotidine-5'-phosphate decarboxylase activity|orotidine-5'-phosphate decarboxylase activity|	5	-5	60.3	5	-2.3	25.6	-4.8	-7.2	-3.2	80.7	5e-07	1
51575	ESF1	ESF1, nucleolar pre-rRNA processing protein, homolog (S. cerevisiae)	extracellular space|nucleoplasm|nucleolus|	transcription, DNA-templated|regulation of transcription, DNA-templated|	poly(A) RNA binding|	10	-3.9	36.3	10	-5.2	46.2	-5	-7.2	-3.2	80.1	5e-07	1
57062	DDX24	DEAD (Asp-Glu-Ala-Asp) box helicase 24	nucleolus|membrane|	ATP catabolic process|RNA metabolic process|	RNA helicase activity|ATP binding|ATP-dependent helicase activity|poly(A) RNA binding|	5	-3.4	22.7	5	-4.4	59.2	-4.3	-6.6	-3.4	80	5e-07	1
54623	PAF1	Paf1, RNA polymerase II associated factor, homolog (S. cerevisiae)	Cdc73/Paf1 complex|	negative regulation of transcription from RNA polymerase II promoter|endodermal cell fate commitment|transcription, DNA-templated|mRNA polyadenylation|histone monoubiquitination|Wnt signaling pathway|stem cell maintenance|positive regulation of mRNA 3'-end processing|positive regulation of transcription elongation from RNA polymerase II promoter|histone H2B ubiquitination|negative regulation of m…	RNA polymerase II core binding|chromatin binding|protein binding|	5	-4.1	30.2	5	-5.5	51.9	-5.4	-8.2	-3.4	80	5e-07	1
55035	NOL8	nucleolar protein 8	nucleus|nucleolus|cytoplasm|	DNA replication|rRNA processing|positive regulation of cell growth|	nucleotide binding|protein binding|poly(A) RNA binding|	5	-4.9	29.4	5	-5.1	50.8	-5	-8.9	-4.3	79.8	5e-07	1
5432	POLR2C	polymerase (RNA) II (DNA directed) polypeptide C, 33kDa	nucleus|nucleoplasm|DNA-directed RNA polymerase II, core complex|cytoplasm|microtubule cytoskeleton|	mRNA splicing, via spliceosome|DNA repair|transcription-coupled nucleotide-excision repair|nucleotide-excision repair|transcription from RNA polymerase II promoter|transcription from RNA polymerase II promoter|transcription initiation from RNA polymerase II promoter|transcription elongation from RNA polymerase II promoter|7-methylguanosine mRNA capping|RNA splicing|gene expression|viral process|p…	RNA polymerase II activity|DNA binding|protein dimerization activity|	5	-5	37.8	4	-4.4	42.8	-4.9	-8.2	-3.8	79.8	5e-07	1
84164	ASCC2	activating signal cointegrator 1 complex subunit 2	None	transcription, DNA-templated|regulation of transcription, DNA-templated|	None	5	-4.7	41.5	5	-3.4	38.9	-4.5	-6.8	-3.2	78.2	5e-07	1
84946	LTV1	LTV1 ribosome biogenesis factor	nucleus|cytoplasm|	None	None	5	-5	40.8	5	-5.9	38.1	-5.8	-9.6	-4.6	77.8	5e-07	1
2079	ERH	enhancer of rudimentary homolog (Drosophila)	midbody|	nucleobase-containing compound metabolic process|pyrimidine nucleoside metabolic process|cell cycle|	poly(A) RNA binding|	4	5.2	33.8	5	4.1	45	5	3.6	8.1	77.3	5e-07	1
2475	MTOR	mechanistic target of rapamycin (serine/threonine kinase)	Golgi membrane|cytoplasm|mitochondrial outer membrane|lysosome|lysosomal membrane|endoplasmic reticulum membrane|cytosol|phosphatidylinositol 3-kinase complex|endomembrane system|membrane|PML body|TORC1 complex|TORC1 complex|TORC2 complex|mTOR-FKBP12-rapamycin complex|	positive regulation of protein phosphorylation|positive regulation of endothelial cell proliferation|regulation of glycogen biosynthetic process|protein phosphorylation|protein phosphorylation|response to stress|signal transduction|epidermal growth factor receptor signaling pathway|germ cell development|response to nutrient|insulin receptor signaling pathway|fibroblast growth factor receptor sign…	RNA polymerase III type 1 promoter DNA binding|RNA polymerase III type 2 promoter DNA binding|RNA polymerase III type 3 promoter DNA binding|TFIIIC-class transcription factor binding|protein serine/threonine kinase activity|protein serine/threonine kinase activity|protein binding|ATP binding|drug binding|kinase activity|kinase activity|protein domain specific binding|ribosome binding|phosphoprote…	5	-3.9	41.7	5	-3.6	36.2	-3.8	-5.9	-3.1	77.3	5e-07	1
54934	KANSL2	KAT8 regulatory NSL complex subunit 2	histone acetyltransferase complex|nucleoplasm|	chromatin organization|histone H4-K5 acetylation|histone H4-K8 acetylation|histone H4-K16 acetylation|	histone acetyltransferase activity (H4-K5 specific)|histone acetyltransferase activity (H4-K8 specific)|histone acetyltransferase activity (H4-K16 specific)|	5	3.1	24.5	5	3.1	53.1	3.1	2.5	4.7	77.2	5e-07	1
51371	POMP	proteasome maturation protein	proteasome complex|nucleus|endoplasmic reticulum|cytosol|organelle membrane|	proteasome assembly|	protein binding|	5	-4.1	46.3	5	-3.8	31.5	-4	-6	-3.1	77.1	5e-07	1
30836	DNTTIP2	deoxynucleotidyltransferase, terminal, interacting protein 2	nucleus|nucleolus|	transcription, DNA-templated|regulation of transcription, DNA-templated|	poly(A) RNA binding|	5	-4.5	29.4	5	-4.3	47.1	-4.4	-7.4	-3.5	76.1	1e-06	1
55781	RIOK2	RIO kinase 2	None	protein phosphorylation|	protein serine/threonine kinase activity|ATP binding|	5	-4.2	46.5	5	-2.9	31.7	-4	-5.8	-2.7	75.7	1e-06	1
6222	RPS18	ribosomal protein S18	nucleus|cytosol|cytosol|ribosome|small ribosomal subunit|small ribosomal subunit|membrane|cytosolic small ribosomal subunit|extracellular vesicular exosome|	nuclear-transcribed mRNA catabolic process, nonsense-mediated decay|translation|translation|translation|translational initiation|translational elongation|translational termination|SRP-dependent cotranslational protein targeting to membrane|gene expression|viral process|RNA metabolic process|mRNA metabolic process|viral life cycle|viral transcription|ribosome biogenesis|cellular protein metabolic …	structural constituent of ribosome|protein binding|rRNA binding|poly(A) RNA binding|	5	-3.1	22.1	5	-4.3	55.8	-4.2	-6.3	-3.2	75.7	1e-06	1
5557	PRIM1	primase, DNA, polypeptide 1 (49kDa)	nucleoplasm|membrane|primosome complex|	G1/S transition of mitotic cell cycle|mitotic cell cycle|telomere maintenance via recombination|telomere maintenance|DNA replication, synthesis of RNA primer|DNA replication initiation|DNA strand elongation involved in DNA replication|telomere maintenance via semi-conservative replication|	DNA primase activity|metal ion binding|	5	-4.9	31.3	5	-4.4	44.9	-4.7	-7.3	-3.7	75.4	1e-06	1
5695	PSMB7	proteasome (prosome, macropain) subunit, beta type, 7	proteasome complex|nucleus|nucleoplasm|cytosol|proteasome core complex|microtubule cytoskeleton|extracellular vesicular exosome|	G1/S transition of mitotic cell cycle|protein polyubiquitination|mitotic cell cycle|antigen processing and presentation of peptide antigen via MHC class I|antigen processing and presentation of exogenous peptide antigen via MHC class I, TAP-dependent|regulation of cellular amino acid metabolic process|apoptotic process|DNA damage response, signal transduction by p53 class mediator resulting in ce…	threonine-type endopeptidase activity|protein binding|	5	-3.5	26.4	5	-4.5	50.3	-4.4	-6.7	-3.1	74.9	1e-06	1
1743	DLST	dihydrolipoamide S-succinyltransferase (E2 component of 2-oxo-glutarate complex)	nucleus|mitochondrial matrix|membrane|oxoglutarate dehydrogenase complex|extracellular vesicular exosome|	generation of precursor metabolites and energy|tricarboxylic acid cycle|lysine catabolic process|L-lysine catabolic process to acetyl-CoA via saccharopine|cellular nitrogen compound metabolic process|cellular metabolic process|small molecule metabolic process|	dihydrolipoyllysine-residue succinyltransferase activity|	5	-4.9	35.4	5	-5.3	39.6	-5.2	-8.7	-4.2	74.2	1e-06	1
6193	RPS5	ribosomal protein S5	cytosol|membrane|cytosolic small ribosomal subunit|ribonucleoprotein complex|extracellular vesicular exosome|	nuclear-transcribed mRNA catabolic process, nonsense-mediated decay|translation|translation|translation|translation|translational initiation|translational initiation|translational elongation|translational termination|regulation of translational fidelity|SRP-dependent cotranslational protein targeting to membrane|gene expression|viral process|RNA metabolic process|mRNA metabolic process|viral life…	RNA binding|mRNA binding|structural constituent of ribosome|poly(A) RNA binding|	5	-4	45.1	4	-3.1	30.2	-3.8	-6	-2.9	74	1e-06	1
6229	RPS24	ribosomal protein S24	nucleus|nucleolus|cytoplasm|cytosol|small ribosomal subunit|small ribosomal subunit|membrane|cytosolic small ribosomal subunit|	nuclear-transcribed mRNA catabolic process, nonsense-mediated decay|maturation of SSU-rRNA from tricistronic rRNA transcript (SSU-rRNA, 5.8S rRNA, LSU-rRNA)|rRNA processing|translation|translation|translational initiation|translational elongation|translational termination|SRP-dependent cotranslational protein targeting to membrane|gene expression|viral process|RNA metabolic process|mRNA metabolic…	nucleotide binding|structural constituent of ribosome|translation initiation factor binding|poly(A) RNA binding|	5	-4	36	5	-3.8	38.4	-3.8	-6	-3.2	73.9	1e-06	1
2091	FBL	fibrillarin	granular component|nucleus|nucleolus|Cajal body|membrane|box C/D snoRNP complex|extracellular vesicular exosome|	osteoblast differentiation|rRNA processing|tRNA processing|snoRNA metabolic process|histone glutamine methylation|	RNA binding|protein binding|poly(A) RNA binding|histone-glutamine methyltransferase activity|	5	-2.3	21.6	5	-3.5	54	-3.4	-5.2	-2.9	73	2e-06	1
6128	RPL6	ribosomal protein L6	nucleus|cytosol|membrane|cytosolic large ribosomal subunit|cytoplasmic ribonucleoprotein granule|	nuclear-transcribed mRNA catabolic process, nonsense-mediated decay|regulation of transcription, DNA-templated|translation|translation|translational initiation|translational elongation|translational termination|SRP-dependent cotranslational protein targeting to membrane|gene expression|viral process|RNA metabolic process|mRNA metabolic process|viral life cycle|viral transcription|cellular protein…	DNA binding|RNA binding|structural constituent of ribosome|poly(A) RNA binding|	5	-3.5	27.8	5	-3.5	45.6	-3.5	-5.3	-2.9	73	2e-06	1
6125	RPL5	ribosomal protein L5	nucleus|nucleolus|cytoplasm|cytosol|membrane|cytosolic large ribosomal subunit|ribonucleoprotein complex|extracellular vesicular exosome|	nuclear-transcribed mRNA catabolic process, nonsense-mediated decay|rRNA processing|translation|translation|translational initiation|translational elongation|translational termination|SRP-dependent cotranslational protein targeting to membrane|gene expression|viral process|RNA metabolic process|mRNA metabolic process|viral life cycle|viral transcription|ribosomal large subunit biogenesis|cellular…	RNA binding|structural constituent of ribosome|protein binding|5S rRNA binding|poly(A) RNA binding|	5	-3.9	38.7	5	-3.1	35.6	-3.3	-5.5	-2.7	72.7	2e-06	1
131118	DNAJC19	DnaJ (Hsp40) homolog, subfamily C, member 19	mitochondrion|mitochondrial inner membrane|integral component of membrane|	protein folding|protein targeting to mitochondrion|protein targeting to mitochondrion|visual perception|cellular protein metabolic process|genitalia development|	None	5	-2.7	23.6	5	-4.5	52	-4.4	-7.3	-3.6	72.1	2.5e-06	1
92856	IMP4	IMP4, U3 small nucleolar ribonucleoprotein	nucleolus|ribonucleoprotein complex|	rRNA processing|	protein binding|	5	-4.2	31.4	5	-4.2	40.8	-4.2	-7.1	-3.6	71.8	2.5e-06	1
6234	RPS28	ribosomal protein S28	cytoplasm|cytosol|small ribosomal subunit|cytosolic small ribosomal subunit|extracellular vesicular exosome|	nuclear-transcribed mRNA catabolic process, nonsense-mediated decay|rRNA processing|translation|translation|translational initiation|translational elongation|translational termination|SRP-dependent cotranslational protein targeting to membrane|gene expression|viral process|RNA metabolic process|mRNA metabolic process|viral life cycle|viral transcription|ribosomal small subunit biogenesis|cellular…	structural constituent of ribosome|poly(A) RNA binding|	5	-3.5	31.2	5	-5.7	44.2	-5.6	-8.2	-3.3	71.7	2.5e-06	1
30827	CXXC1	CXXC finger protein 1	nucleus|nucleoplasm|nuclear matrix|nuclear speck|histone methyltransferase complex|Set1C/COMPASS complex|	transcription, DNA-templated|regulation of transcription, DNA-templated|activation of signaling protein activity involved in unfolded protein response|endoplasmic reticulum unfolded protein response|cellular protein metabolic process|positive regulation of transcription, DNA-templated|histone H3-K4 methylation|	protein binding|zinc ion binding|histone methyltransferase activity (H3-K4 specific)|unmethylated CpG binding|	5	-3.4	26.1	5	-4.6	47.4	-4.5	-6.9	-3.1	71.3	2.5e-06	1
5690	PSMB2	proteasome (prosome, macropain) subunit, beta type, 2	proteasome complex|nucleus|nucleoplasm|cytosol|proteasome core complex|membrane|extracellular vesicular exosome|	G1/S transition of mitotic cell cycle|protein polyubiquitination|mitotic cell cycle|antigen processing and presentation of peptide antigen via MHC class I|antigen processing and presentation of exogenous peptide antigen via MHC class I, TAP-dependent|regulation of cellular amino acid metabolic process|apoptotic process|DNA damage response, signal transduction by p53 class mediator resulting in ce…	threonine-type endopeptidase activity|protein binding|	4	-3.2	28.3	5	-3.2	43.2	-3.2	-4.9	-2.6	71.1	2.5e-06	1
27340	UTP20	UTP20, small subunit (SSU) processome component, homolog (yeast)	nucleoplasm|nucleolus|nucleolus|cytoplasm|90S preribosome|preribosome, small subunit precursor|small-subunit processome|	endonucleolytic cleavage in ITS1 to separate SSU-rRNA from 5.8S rRNA and LSU-rRNA from tricistronic rRNA transcript (SSU-rRNA, 5.8S rRNA, LSU-rRNA)|endonucleolytic cleavage to generate mature 5'-end of SSU-rRNA from (SSU-rRNA, 5.8S rRNA, LSU-rRNA)|endonucleolytic cleavage in 5'-ETS of tricistronic rRNA transcript (SSU-rRNA, 5.8S rRNA, LSU-rRNA)|rRNA processing|negative regulation of cell prolifer…	protein binding|poly(A) RNA binding|	5	-3.5	32.2	5	-3.7	39.5	-3.6	-5.2	-2.6	71.1	2.5e-06	1
22984	PDCD11	programmed cell death 11	nucleus|nucleolus|cytosol|	rRNA processing|mRNA processing|	protein binding|transcription factor binding|poly(A) RNA binding|	5	-3.3	30.8	5	-3.8	41.1	-3.6	-5.4	-3.1	70.9	2.5e-06	1
10514	MYBBP1A	MYB binding protein (P160) 1a	nucleus|nucleus|nucleolus|nucleolus|cytoplasm|membrane|NLS-dependent protein nuclear import complex|intracellular membrane-bounded organelle|	osteoblast differentiation|DNA-dependent DNA replication|transcription, DNA-templated|regulation of transcription, DNA-templated|nucleocytoplasmic transport|respiratory electron transport chain|cellular response to glucose starvation|negative regulation of transcription, DNA-templated|positive regulation of cell cycle arrest|intrinsic apoptotic signaling pathway by p53 class mediator|	DNA-directed DNA polymerase activity|protein binding|transcription factor binding|sequence-specific DNA binding|poly(A) RNA binding|	5	-3.2	32.2	5	-2.9	39.4	-3.1	-4.6	-2.6	70.7	2.5e-06	1
51163	DBR1	debranching RNA lariats 1	nucleus|	RNA splicing, via transesterification reactions|mRNA splicing, via spliceosome|RNA phosphodiester bond hydrolysis, endonucleolytic|	RNA lariat debranching enzyme activity|poly(A) RNA binding|metal ion binding|	5	3	28.3	5	2.7	42.4	2.8	2.4	4.4	70.1	2.5e-06	1
6169	RPL38	ribosomal protein L38	cytosol|cytosolic large ribosomal subunit|eukaryotic 80S initiation complex|	nuclear-transcribed mRNA catabolic process, nonsense-mediated decay|skeletal system development|ossification|translation|translation|translational initiation|translational elongation|translational termination|regulation of translation|SRP-dependent cotranslational protein targeting to membrane|sensory perception of sound|gene expression|viral process|RNA metabolic process|mRNA metabolic process|v…	RNA binding|structural constituent of ribosome|	5	-4.5	45.9	5	-2.9	27.1	-4.3	-6.4	-2.9	70.1	2.5e-06	1
6207	RPS13	ribosomal protein S13	nucleus|nucleolus|cytosol|ribosome|membrane|cytosolic small ribosomal subunit|extracellular vesicular exosome|	nuclear-transcribed mRNA catabolic process, nonsense-mediated decay|translation|translation|translational initiation|translational elongation|translational termination|SRP-dependent cotranslational protein targeting to membrane|gene expression|viral process|RNA metabolic process|mRNA metabolic process|viral life cycle|viral transcription|negative regulation of RNA splicing|cellular protein metabo…	mRNA binding|structural constituent of ribosome|protein binding|poly(A) RNA binding|	4	-3.1	27	5	-2.9	43.5	-3.1	-4.7	-2.6	70	2.5e-06	1
57448	BIRC6	baculoviral IAP repeat containing 6	spindle pole|endosome|trans-Golgi network|microtubule organizing center|membrane|midbody|	protein phosphorylation|apoptotic process|mitotic nuclear division|positive regulation of cell proliferation|negative regulation of endopeptidase activity|negative regulation of endopeptidase activity|protein ubiquitination|regulation of cytokinesis|regulation of cell proliferation|negative regulation of apoptotic process|negative regulation of apoptotic process|labyrinthine layer development|spo…	ubiquitin-protein transferase activity|cysteine-type endopeptidase inhibitor activity|protein binding|acid-amino acid ligase activity|	5	4.2	20.1	5	5.5	51.5	5.3	3.8	8.2	69.9	2.5e-06	1
2958	GTF2A2	general transcription factor IIA, 2, 12kDa	nucleus|nucleoplasm|transcription factor TFIIA complex|cell junction|	transcription from RNA polymerase II promoter|transcription from RNA polymerase II promoter|transcription initiation from RNA polymerase II promoter|transcription elongation from RNA polymerase II promoter|gene expression|viral process|positive regulation of transcription from RNA polymerase II promoter|positive regulation of sequence-specific DNA binding transcription factor activity|RNA polymer…	RNA polymerase II repressing transcription factor binding|transcription coactivator activity|protein binding|transcription factor binding|TBP-class protein binding|protein homodimerization activity|protein heterodimerization activity|	5	-6.6	35.7	5	-6	34.8	-6.5	-9.9	-5.4	69.6	2.5e-06	1
692312	PPAN-P2RY11	PPAN-P2RY11 readthrough	None	None	None	5	-4.1	42.1	5	-3	28.6	-3.9	-5.7	-2.6	68.7	2.5e-06	1
55339	WDR33	WD repeat domain 33	collagen trimer|nucleus|	postreplication repair|mRNA processing|spermatogenesis|	poly(A) RNA binding|	5	-4.3	37.1	5	-3.2	33.7	-4.1	-6	-2.8	68.6	2.5e-06	1
6203	RPS9	ribosomal protein S9	nucleus|nucleolus|cytoplasm|cytosol|ribosome|membrane|cytosolic small ribosomal subunit|ribonucleoprotein complex|extracellular vesicular exosome|	nuclear-transcribed mRNA catabolic process, nonsense-mediated decay|translation|translation|translation|translational initiation|translational elongation|translational termination|regulation of translation|SRP-dependent cotranslational protein targeting to membrane|positive regulation of cell proliferation|gene expression|viral process|RNA metabolic process|mRNA metabolic process|viral life cycle…	structural constituent of ribosome|protein binding|rRNA binding|poly(A) RNA binding|translation regulator activity|	5	-5.1	31.2	5	-4.2	38.5	-4.9	-8.1	-3.7	68.4	2.5e-06	1
23168	RTF1	Rtf1, Paf1/RNA polymerase II complex component, homolog (S. cerevisiae)	nucleolus|Cdc73/Paf1 complex|	negative regulation of transcription from RNA polymerase II promoter|endodermal cell fate commitment|DNA-templated transcription, initiation|Wnt signaling pathway|stem cell maintenance|positive regulation of transcription elongation from RNA polymerase II promoter|positive regulation of transcription from RNA polymerase II promoter|positive regulation of histone H3-K4 methylation|histone H3-K4 tr…	single-stranded DNA binding|protein binding|poly(A) RNA binding|	5	-4.3	43.2	5	-4	25.8	-4.2	-6.5	-3.3	68.4	2.5e-06	1
5719	PSMD13	proteasome (prosome, macropain) 26S subunit, non-ATPase, 13	proteasome complex|nucleus|nucleoplasm|cytosol|proteasome regulatory particle|membrane|proteasome accessory complex|extracellular vesicular exosome|	G1/S transition of mitotic cell cycle|protein polyubiquitination|mitotic cell cycle|antigen processing and presentation of peptide antigen via MHC class I|antigen processing and presentation of exogenous peptide antigen via MHC class I, TAP-dependent|regulation of cellular amino acid metabolic process|apoptotic process|DNA damage response, signal transduction by p53 class mediator resulting in ce…	None	5	-6.7	35.8	5	-4.2	35.2	-6.6	-11.3	-4.3	68.2	2.5e-06	1
51082	POLR1D	polymerase (RNA) I polypeptide D, 16kDa	nucleoplasm|DNA-directed RNA polymerase III complex|DNA-directed RNA polymerase I complex|cytosol|	transcription from RNA polymerase I promoter|transcription initiation from RNA polymerase I promoter|transcription elongation from RNA polymerase I promoter|termination of RNA polymerase I transcription|transcription from RNA polymerase III promoter|transcription elongation from RNA polymerase III promoter|termination of RNA polymerase III transcription|gene expression|positive regulation of type…	RNA polymerase I activity|RNA polymerase III activity|DNA binding|protein dimerization activity|	10	-3.8	36.9	10	-3.2	32	-3.3	-4.7	-2.8	68	2.5e-06	1
23019	CNOT1	CCR4-NOT transcription complex, subunit 1	cytoplasmic mRNA processing body|cytoplasmic mRNA processing body|extracellular space|nucleus|peroxisomal membrane|cytosol|membrane|CCR4-NOT complex|	negative regulation of transcription from RNA polymerase II promoter|nuclear-transcribed mRNA catabolic process, deadenylation-dependent decay|nuclear-transcribed mRNA poly(A) tail shortening|transcription, DNA-templated|regulation of translation|multicellular organismal development|gene expression|positive regulation of cytoplasmic mRNA processing body assembly|RNA metabolic process|mRNA metabol…	poly(A)-specific ribonuclease activity|protein binding|estrogen receptor binding|retinoic acid receptor binding|poly(A) RNA binding|	5	-2.6	13.7	5	-4.1	56.7	-4	-6.3	-2.8	67.8	2.5e-06	1
6139	RPL17	ribosomal protein L17	nucleus|cytosol|cytosolic large ribosomal subunit|	nuclear-transcribed mRNA catabolic process, nonsense-mediated decay|translation|translation|translational initiation|translational elongation|translational termination|SRP-dependent cotranslational protein targeting to membrane|gene expression|viral process|RNA metabolic process|mRNA metabolic process|viral life cycle|viral transcription|cellular protein metabolic process|	structural constituent of ribosome|poly(A) RNA binding|	5	-3.4	27.6	5	-3.6	40.4	-3.5	-5.3	-3	67.6	2.5e-06	1
51367	POP5	processing of precursor 5, ribonuclease P/MRP subunit (S. cerevisiae)	nucleolar ribonuclease P complex|	tRNA processing|RNA phosphodiester bond hydrolysis, endonucleolytic|	ribonuclease P activity|protein binding|	5	-3.3	26.5	5	-3.7	41.7	-3.6	-5.4	-2.7	67.4	2.5e-06	1
6210	RPS15A	ribosomal protein S15a	cytoplasm|cytosol|membrane|cytosolic small ribosomal subunit|extracellular vesicular exosome|	nuclear-transcribed mRNA catabolic process, nonsense-mediated decay|translation|translation|translation|translational initiation|translational elongation|translational termination|SRP-dependent cotranslational protein targeting to membrane|positive regulation of cell proliferation|response to virus|gene expression|viral process|RNA metabolic process|mRNA metabolic process|viral life cycle|viral t…	RNA binding|structural constituent of ribosome|structural constituent of ribosome|poly(A) RNA binding|	5	-4.7	40.5	5	-3.1	29.5	-4.6	-6.8	-2.9	67.2	2.5e-06	1
10940	POP1	processing of precursor 1, ribonuclease P/MRP subunit (S. cerevisiae)	ribonuclease MRP complex|extracellular space|nucleolar ribonuclease P complex|	tRNA 5'-leader removal|tRNA catabolic process|RNA phosphodiester bond hydrolysis|RNA phosphodiester bond hydrolysis, endonucleolytic|RNA phosphodiester bond hydrolysis, endonucleolytic|	ribonuclease MRP activity|ribonuclease P activity|protein binding|poly(A) RNA binding|	5	-5.4	50.1	5	-3.2	19.8	-5.3	-9.3	-4.1	66.8	2.5e-06	1
23246	BOP1	block of proliferation 1	nucleoplasm|ribonucleoprotein complex|preribosome, large subunit precursor|PeBoW complex|	maturation of LSU-rRNA from tricistronic rRNA transcript (SSU-rRNA, 5.8S rRNA, LSU-rRNA)|maturation of 5.8S rRNA from tricistronic rRNA transcript (SSU-rRNA, 5.8S rRNA, LSU-rRNA)|cell proliferation|ribosome biogenesis|ribosome biogenesis|regulation of cell cycle|	protein binding|ribonucleoprotein complex binding|poly(A) RNA binding|	10	-3.9	33	10	-4.9	35.4	-4.7	-8	-3.7	66.7	2.5e-06	1
11103	KRR1	KRR1, small subunit (SSU) processome component, homolog (yeast)	nucleus|nucleolus|cytoplasm|membrane|ribonucleoprotein complex|intercellular bridge|	rRNA processing|	protein binding|poly(A) RNA binding|	5	-4.1	37.9	5	-3.1	30.7	-4	-5.9	-2.6	66.6	3e-06	1
5822	PWP2	PWP2 periodic tryptophan protein homolog (yeast)	nucleolus|cytoplasm|	signal transduction|	signal transducer activity|poly(A) RNA binding|	5	-3.2	15.4	5	-4.2	52.3	-4.1	-6.6	-3.3	66.1	3e-06	1
134430	WDR36	WD repeat domain 36	cellular_component|nucleolus|small-subunit processome|	retina homeostasis|rRNA processing|visual perception|biological_process|regulation of axon extension|response to stimulus|	poly(A) RNA binding|	5	-4.6	35.7	5	-4.6	30.7	-4.6	-7.7	-3.7	66.1	3e-06	1
6881	TAF10	TAF10 RNA polymerase II, TATA box binding protein (TBP)-associated factor, 30kDa	PCAF complex|nucleus|nucleoplasm|transcription factor TFIID complex|cytoplasm|STAGA complex|transcription factor TFTC complex|perinuclear region of cytoplasm|	chromatin organization|DNA-templated transcription, initiation|regulation of transcription, DNA-templated|transcription from RNA polymerase II promoter|transcription from RNA polymerase II promoter|transcription initiation from RNA polymerase II promoter|transcription initiation from RNA polymerase II promoter|transcription initiation from RNA polymerase II promoter|transcription elongation from …	sequence-specific DNA binding transcription factor activity|transcription coactivator activity|histone acetyltransferase activity|protein binding|protein binding|enzyme binding|estrogen receptor binding|RNA polymerase binding|	5	-5.2	30.5	5	-4.4	36.5	-5.1	-8.8	-4	66	3e-06	1
728689	EIF3CL	eukaryotic translation initiation factor 3, subunit C-like	eukaryotic translation initiation factor 3 complex|eukaryotic 43S preinitiation complex|eukaryotic 48S preinitiation complex|	formation of translation preinitiation complex|regulation of translational initiation|	translation initiation factor activity|translation initiation factor binding|	5	-5.6	42	5	-3.8	26.4	-5.5	-8.5	-3.5	65.9	3e-06	1
159	ADSS	adenylosuccinate synthase	cytoplasm|cytosol|plasma membrane|	immune system process|purine nucleobase metabolic process|AMP biosynthetic process|AMP biosynthetic process|GTP catabolic process|aspartate metabolic process|purine ribonucleoside monophosphate biosynthetic process|response to purine-containing compound|'de novo' AMP biosynthetic process|small molecule metabolic process|IMP metabolic process|nucleobase-containing small molecule metabolic process|…	magnesium ion binding|adenylosuccinate synthase activity|adenylosuccinate synthase activity|protein binding|GTP binding|phosphate ion binding|	5	-4.2	29.8	5	-4.5	36.3	-4.3	-7.4	-3.4	65.6	3e-06	1
4967	OGDH	oxoglutarate (alpha-ketoglutarate) dehydrogenase (lipoamide)	mitochondrion|mitochondrial matrix|mitochondrial membrane|oxoglutarate dehydrogenase complex|	generation of precursor metabolites and energy|glycolytic process|tricarboxylic acid cycle|2-oxoglutarate metabolic process|succinyl-CoA metabolic process|lysine catabolic process|NADH metabolic process|cerebellar cortex development|striatum development|hippocampus development|thalamus development|pyramidal neuron development|tangential migration from the subventricular zone to the olfactory bulb…	oxoglutarate dehydrogenase (succinyl-transferring) activity|thiamine pyrophosphate binding|heat shock protein binding|oxoglutarate dehydrogenase (NAD+) activity|metal ion binding|chaperone binding|	5	-3.8	24.9	5	-4.4	41.3	-4.3	-6.7	-3.2	65.1	3e-06	1
56342	PPAN	peter pan homolog (Drosophila)	nucleus|nucleolus|	RNA splicing|	poly(A) RNA binding|	5	-4.1	42.9	5	-3.1	23.8	-3.9	-6	-2.6	65	3e-06	1
6874	TAF4	TAF4 RNA polymerase II, TATA box binding protein (TBP)-associated factor, 135kDa	nucleus|nucleoplasm|transcription factor TFIID complex|cytoplasm|transcription factor TFTC complex|MLL1 complex|	ovarian follicle development|DNA-templated transcription, initiation|transcription from RNA polymerase II promoter|transcription initiation from RNA polymerase II promoter|transcription initiation from RNA polymerase II promoter|transcription elongation from RNA polymerase II promoter|gene expression|viral process|positive regulation of transcription, DNA-templated|	DNA binding|sequence-specific DNA binding transcription factor activity|transcription coactivator activity|protein binding|protein heterodimerization activity|	5	-4.2	47.6	5	-2.9	19.6	-4	-5.9	-2.8	65	3e-06	1
6217	RPS16	ribosomal protein S16	cytosol|small ribosomal subunit|membrane|cytosolic small ribosomal subunit|cytosolic small ribosomal subunit|extracellular vesicular exosome|	nuclear-transcribed mRNA catabolic process, nonsense-mediated decay|rRNA processing|translation|translation|translation|translational initiation|translational elongation|translational termination|SRP-dependent cotranslational protein targeting to membrane|gene expression|viral process|RNA metabolic process|mRNA metabolic process|viral life cycle|viral transcription|ribosomal small subunit biogene…	RNA binding|structural constituent of ribosome|protein binding|poly(A) RNA binding|	5	-5.3	34.9	5	-4.9	30.5	-5.2	-8.5	-4.2	64.7	3e-06	1
6838	SURF6	surfeit 6	granular component|nucleoplasm|nucleolus|	ribosome biogenesis|	DNA binding|RNA binding|poly(A) RNA binding|	5	-3.2	23.2	5	-4.5	43.8	-4.4	-6.6	-3	64.7	3e-06	1
1503	CTPS1	CTP synthase 1	cellular_component|cytosol|membrane|	nucleobase-containing compound metabolic process|CTP biosynthetic process|glutamine metabolic process|nucleobase-containing small molecule interconversion|response to drug|'de novo' CTP biosynthetic process|small molecule metabolic process|nucleobase-containing small molecule metabolic process|	CTP synthase activity|CTP synthase activity|CTP synthase activity|ATP binding|	5	-3.9	41.6	5	-2.5	25.4	-3.6	-5.5	-2.6	64.4	3e-06	1
26354	GNL3	guanine nucleotide binding protein-like 3 (nucleolar)	extracellular space|nucleus|nucleoplasm|nucleolus|nucleolus|membrane|	GTP catabolic process|cell proliferation|regulation of cell proliferation|ribosome biogenesis|	GTPase activity|protein binding|GTP binding|poly(A) RNA binding|	5	-4	48.3	5	-3.5	16.9	-3.9	-6.2	-3.1	64.3	3e-06	1
5411	PNN	pinin, desmosome associated protein	nucleus|cytoplasm|intermediate filament|plasma membrane|cell-cell junction|membrane|nuclear speck|desmosome|exon-exon junction complex|catalytic step 2 spliceosome|	mRNA splicing, via spliceosome|transcription, DNA-templated|regulation of transcription, DNA-templated|cell adhesion|	DNA binding|structural molecule activity|poly(A) RNA binding|	5	-4.8	38.3	5	-3.1	28.3	-4.6	-7	-2.6	64	3.5e-06	1
9443	MED7	mediator complex subunit 7	nucleus|nucleoplasm|transcription factor complex|mitochondrion|mediator complex|nuclear membrane|	regulation of transcription from RNA polymerase II promoter|transcription initiation from RNA polymerase II promoter|gene expression|stem cell maintenance|	RNA polymerase II transcription cofactor activity|transcription coactivator activity|protein binding|	5	-2.9	14.5	5	-5	52.4	-4.8	-7.5	-2.8	63.7	4e-06	1
79657	RPAP3	RNA polymerase II associated protein 3	None	None	protein binding|	5	-5.6	28.8	5	-5.6	35.2	-5.6	-9.8	-4.8	63.6	4e-06	1
51491	NOP16	NOP16 nucleolar protein	nucleus|nucleolus|intracellular membrane-bounded organelle|	None	poly(A) RNA binding|	5	-5.3	50.2	5	-3.5	15.3	-5.2	-9	-4	63.4	4e-06	1
55813	UTP6	UTP6, small subunit (SSU) processome component, homolog (yeast)	nucleolus|	rRNA processing|	None	5	-4.1	43.2	5	-3.6	20.9	-3.9	-6.1	-2.9	63.4	4e-06	1
121053	C12ORF45	chromosome 12 open reading frame 45	None	None	None	5	-2.8	24.6	5	-3.2	39.6	-3.1	-4.9	-2.6	63.3	4e-06	1
5689	PSMB1	proteasome (prosome, macropain) subunit, beta type, 1	proteasome complex|nucleus|nucleoplasm|cytosol|proteasome core complex|extracellular vesicular exosome|	G1/S transition of mitotic cell cycle|protein polyubiquitination|mitotic cell cycle|antigen processing and presentation of peptide antigen via MHC class I|antigen processing and presentation of exogenous peptide antigen via MHC class I, TAP-dependent|regulation of cellular amino acid metabolic process|apoptotic process|DNA damage response, signal transduction by p53 class mediator resulting in ce…	threonine-type endopeptidase activity|protein binding|	5	-5.3	36.5	5	-3.9	28.9	-5.2	-8.4	-3.6	63.3	4e-06	1
6231	RPS26	ribosomal protein S26	nucleolus|cytoplasm|cytosol|small ribosomal subunit|membrane|cytosolic small ribosomal subunit|extracellular vesicular exosome|	nuclear-transcribed mRNA catabolic process, nonsense-mediated decay|translation|translation|translational initiation|translational elongation|translational termination|SRP-dependent cotranslational protein targeting to membrane|gene expression|viral process|RNA metabolic process|mRNA metabolic process|viral life cycle|viral transcription|negative regulation of RNA splicing|cellular protein metabo…	mRNA binding|structural constituent of ribosome|protein binding|poly(A) RNA binding|	5	-5.1	47.3	5	-2.2	20.9	-5	-7.3	-2.8	62.9	4.5e-06	1
9837	GINS1	GINS complex subunit 1 (Psf1 homolog)	nucleus|nucleoplasm|cytoplasm|	mitotic cell cycle|inner cell mass cell proliferation|DNA strand elongation involved in DNA replication|	None	5	-2.8	24	5	-3.9	41	-3.8	-5.9	-2.9	62.7	4.5e-06	1
25871	C3ORF17	chromosome 3 open reading frame 17	integral component of membrane|	None	None	4	-4.1	35.6	5	-3.8	27.4	-4	-6.6	-3.3	62.5	5.5e-06	1
10813	UTP14A	UTP14, U3 small nucleolar ribonucleoprotein, homolog A (yeast)	nucleolus|small-subunit processome|	rRNA processing|	protein binding|poly(A) RNA binding|	5	-4.1	35.3	5	-3.9	26.6	-4	-6.6	-3.3	61.4	6.5e-06	1
6472	SHMT2	serine hydroxymethyltransferase 2 (mitochondrial)	mitochondrion|mitochondrial inner membrane|mitochondrial intermembrane space|mitochondrial matrix|microtubule cytoskeleton|mitochondrial nucleoid|extracellular vesicular exosome|	L-serine biosynthetic process|one-carbon metabolic process|positive regulation of cell proliferation|glycine biosynthetic process from serine|tetrahydrofolate interconversion|protein homotetramerization|	chromatin binding|glycine hydroxymethyltransferase activity|L-allo-threonine aldolase activity|amino acid binding|pyridoxal phosphate binding|identical protein binding|	5	-4.1	52	5	-1.6	14.2	-4	-6.7	-3	61.3	6.5e-06	1
11056	DDX52	DEAD (Asp-Glu-Ala-Asp) box polypeptide 52	nucleus|nucleolus|membrane|	metabolic process|	helicase activity|ATP binding|poly(A) RNA binding|	5	-5.1	33.7	5	-5.3	28	-5.2	-8.9	-4.4	61.2	6.5e-06	1
9188	DDX21	DEAD (Asp-Glu-Ala-Asp) box helicase 21	nucleus|nucleolus|membrane|	osteoblast differentiation|ATP catabolic process|response to virus|response to exogenous dsRNA|	double-stranded RNA binding|ATP-dependent RNA helicase activity|ATP binding|poly(A) RNA binding|	5	-3.6	17.8	5	-4.2	43.5	-4.1	-6.7	-3.4	60.3	6.5e-06	1
79613	TANGO6	transport and golgi organization 6 homolog (Drosophila)	integral component of membrane|	None	None	5	-3.6	15.3	5	-4.5	46.2	-4.4	-7.3	-3.2	60.2	6.5e-06	1
8666	EIF3G	eukaryotic translation initiation factor 3, subunit G	nucleus|cytosol|eukaryotic translation initiation factor 3 complex|eukaryotic 43S preinitiation complex|eukaryotic 48S preinitiation complex|perinuclear region of cytoplasm|	formation of translation preinitiation complex|translation|translational initiation|translational initiation|translational initiation|regulation of translational initiation|gene expression|cellular protein metabolic process|	nucleotide binding|translation initiation factor activity|translation initiation factor activity|protein binding|poly(A) RNA binding|	5	-2.5	26.9	5	-2.7	33.7	-2.6	-4	-2.1	60	6.5e-06	1
23223	RRP12	ribosomal RNA processing 12 homolog (S. cerevisiae)	nucleolus|integral component of membrane|nuclear membrane|	None	poly(A) RNA binding|	5	-4.1	31.3	5	-3.5	29.9	-3.9	-6.2	-3	60	6.5e-06	1
5694	PSMB6	proteasome (prosome, macropain) subunit, beta type, 6	nucleus|nucleoplasm|cytosol|proteasome core complex|extracellular vesicular exosome|	G1/S transition of mitotic cell cycle|protein polyubiquitination|mitotic cell cycle|antigen processing and presentation of peptide antigen via MHC class I|antigen processing and presentation of exogenous peptide antigen via MHC class I, TAP-dependent|regulation of cellular amino acid metabolic process|apoptotic process|DNA damage response, signal transduction by p53 class mediator resulting in ce…	endopeptidase activity|threonine-type endopeptidase activity|	9	-3.7	27.1	9	-4.1	33.6	-3.9	-5.8	-3	59.9	6.5e-06	1
54475	NLE1	notchless homolog 1 (Drosophila)	nucleus|nucleolus|	inner cell mass cell differentiation|Notch signaling pathway|positive regulation of canonical Wnt signaling pathway|negative regulation of cysteine-type endopeptidase activity involved in apoptotic signaling pathway|	None	5	-4	27.6	5	-3.2	33.6	-3.8	-6.3	-2.8	59.8	7e-06	1
7311	UBA52	ubiquitin A-52 residue ribosomal protein fusion product 1	nucleoplasm|lysosomal membrane|cytosol|ribosome|plasma membrane|endosome membrane|cytosolic large ribosomal subunit|endocytic vesicle membrane|	G1/S transition of mitotic cell cycle|G2/M transition of mitotic cell cycle|negative regulation of transcription from RNA polymerase II promoter|nuclear-transcribed mRNA catabolic process, nonsense-mediated decay|activation of MAPK activity|protein polyubiquitination|mitotic cell cycle|toll-like receptor signaling pathway|antigen processing and presentation of peptide antigen via MHC class I|anti…	structural constituent of ribosome|structural constituent of ribosome|protein binding|	10	-3.1	32.4	10	-3.1	27.6	-3.1	-4.2	-2.6	59.7	7e-06	1
10714	POLD3	polymerase (DNA-directed), delta 3, accessory subunit	nucleus|nucleoplasm|mitochondrion|delta DNA polymerase complex|	mitotic cell cycle|telomere maintenance via recombination|telomere maintenance|DNA synthesis involved in DNA repair|DNA strand elongation involved in DNA replication|DNA repair|transcription-coupled nucleotide-excision repair|base-excision repair|nucleotide-excision repair|nucleotide-excision repair, DNA gap filling|nucleotide-excision repair, DNA gap filling|mismatch repair|telomere maintenance …	DNA-directed DNA polymerase activity|protein binding|	5	-2.6	28.9	5	-2.6	30.9	-2.6	-4	-2.2	59.4	7e-06	1
6883	TAF12	TAF12 RNA polymerase II, TATA box binding protein (TBP)-associated factor, 20kDa	PCAF complex|nucleoplasm|transcription factor TFIID complex|STAGA complex|STAGA complex|transcription factor TFTC complex|	chromatin organization|DNA-templated transcription, initiation|transcription from RNA polymerase II promoter|transcription initiation from RNA polymerase II promoter|transcription initiation from RNA polymerase II promoter|transcription elongation from RNA polymerase II promoter|gene expression|viral process|histone H3 acetylation|positive regulation of sequence-specific DNA binding transcription…	DNA binding|sequence-specific DNA binding transcription factor activity|transcription coactivator activity|histone acetyltransferase activity|protein binding|transcription factor binding|protein heterodimerization activity|	5	-3.1	10.5	5	-5.1	51.1	-5	-8.8	-3.9	59.3	7e-06	1
56915	EXOSC5	exosome component 5	exosome (RNase complex)|nucleolus|cytoplasm|cytosol|transcriptionally active chromatin|	nuclear-transcribed mRNA catabolic process, deadenylation-dependent decay|rRNA processing|gene expression|RNA metabolic process|mRNA metabolic process|exonucleolytic nuclear-transcribed mRNA catabolic process involved in deadenylation-dependent decay|exonucleolytic nuclear-transcribed mRNA catabolic process involved in deadenylation-dependent decay|DNA deamination|defense response to virus|RNA ph…	3'-5'-exoribonuclease activity|RNA binding|protein binding|	5	2.9	33.6	5	3.4	26.4	3.3	2.4	4.9	59.2	7e-06	1
80018	NAA25	N(alpha)-acetyltransferase 25, NatB auxiliary subunit	cytoplasm|	None	None	5	-3.9	29.4	5	-3.7	30.3	-3.9	-6.3	-3	59.2	7e-06	1
55341	LSG1	large 60S subunit nuclear export GTPase 1	nucleus|cytoplasm|endoplasmic reticulum|cytosol|Cajal body|membrane|	GTP catabolic process|GTP catabolic process|protein transport|ribosome biogenesis|nuclear export|	GTPase activity|GTPase activity|GTP binding|	5	-4.4	29.6	5	-4.6	29.9	-4.5	-8.1	-3.7	59	7e-06	1
10885	WDR3	WD repeat domain 3	nucleus|nucleolus|nuclear membrane|	None	poly(A) RNA binding|	5	-4.7	40	5	-3.8	20.4	-4.5	-7	-3.2	59	7e-06	1
3608	ILF2	interleukin enhancer binding factor 2	nucleus|nucleolus|cytoplasm|membrane|ribonucleoprotein complex|	transcription, DNA-templated|immune response|positive regulation of transcription, DNA-templated|	DNA binding|double-stranded RNA binding|protein binding|ATP binding|transferase activity|poly(A) RNA binding|	5	-3.5	32.4	5	-3	27.5	-3.2	-5.1	-2.5	58.9	7e-06	1
5684	PSMA3	proteasome (prosome, macropain) subunit, alpha type, 3	proteasome complex|nucleus|nucleus|nucleoplasm|cytoplasm|cytosol|proteasome core complex|proteasome core complex, alpha-subunit complex|extracellular vesicular exosome|	G1/S transition of mitotic cell cycle|protein polyubiquitination|mitotic cell cycle|antigen processing and presentation of peptide antigen via MHC class I|antigen processing and presentation of exogenous peptide antigen via MHC class I, TAP-dependent|regulation of cellular amino acid metabolic process|apoptotic process|DNA damage response, signal transduction by p53 class mediator resulting in ce…	threonine-type endopeptidase activity|protein binding|	5	-4.2	38	5	-3.7	21.6	-4	-6.3	-3.1	58.8	7e-06	1
55003	PAK1IP1	PAK1 interacting protein 1	nucleus|plasma membrane|	negative regulation of signal transduction|	None	5	-5.2	37.7	5	-3.7	23.2	-5.1	-7.7	-3.4	58.5	8e-06	1
1915	EEF1A1	eukaryotic translation elongation factor 1 alpha 1	extracellular space|nucleus|nucleolus|cytoplasm|cytoplasm|cytoplasm|cytosol|eukaryotic translation elongation factor 1 complex|plasma membrane|membrane|extracellular vesicular exosome|	GTP catabolic process|transcription, DNA-templated|regulation of transcription, DNA-templated|translation|translational elongation|gene expression|cellular protein metabolic process|cellular response to epidermal growth factor stimulus|	translation elongation factor activity|GTPase activity|protein binding|GTP binding|protein kinase binding|poly(A) RNA binding|	5	-3.7	22.3	5	-5.2	38	-5	-7.8	-3	57.9	9.5e-06	1
84916	CIRH1A	cirrhosis, autosomal recessive 1A (cirhin)	nucleolus|t-UTP complex|	transcription, DNA-templated|regulation of transcription, DNA-templated|maturation of SSU-rRNA|	protein binding|poly(A) RNA binding|	5	-5.8	49.8	5	-2.6	11.2	-5.7	-10	-4.5	57.5	1.05e-05	1
84128	WDR75	WD repeat domain 75	nucleus|	None	poly(A) RNA binding|	5	-3.3	18.4	5	-4.2	40.8	-4.1	-6.3	-3.1	57.5	1.05e-05	1
80306	MED28	mediator complex subunit 28	membrane|mediator complex|cortical actin cytoskeleton|	transcription, DNA-templated|regulation of transcription, DNA-templated|stem cell maintenance|negative regulation of smooth muscle cell differentiation|	actin binding|protein binding|	5	-4	26.3	5	-4.7	32.1	-4.6	-8.1	-3.6	57.4	1.05e-05	1
5441	POLR2L	polymerase (RNA) II (DNA directed) polypeptide L, 7.6kDa	nucleus|nucleoplasm|DNA-directed RNA polymerase II, core complex|DNA-directed RNA polymerase III complex|DNA-directed RNA polymerase I complex|cytosol|	mRNA splicing, via spliceosome|DNA repair|transcription-coupled nucleotide-excision repair|nucleotide-excision repair|regulation of transcription from RNA polymerase I promoter|transcription from RNA polymerase I promoter|transcription from RNA polymerase II promoter|transcription from RNA polymerase II promoter|transcription initiation from RNA polymerase II promoter|transcription elongation fro…	RNA polymerase I activity|RNA polymerase II activity|RNA polymerase III activity|DNA binding|DNA-directed RNA polymerase activity|zinc ion binding|	5	-2.6	14.1	5	-5.3	46.8	-5.2	-8.3	-3.3	57	1.1e-05	1
84661	DPY30	dpy-30 homolog (C. elegans)	nucleus|Golgi apparatus|trans-Golgi network|histone methyltransferase complex|Set1C/COMPASS complex|	transcription, DNA-templated|regulation of transcription, DNA-templated|endosomal transport|histone H3-K4 methylation|	protein binding|identical protein binding|protein homodimerization activity|	4	-2.2	15.8	4	-3.3	42.5	-3.2	-5.5	-2.6	56.3	1.35e-05	1
6122	RPL3	ribosomal protein L3	nucleus|nucleolus|cytoplasm|cytosol|cytosolic large ribosomal subunit|extracellular vesicular exosome|	nuclear-transcribed mRNA catabolic process, nonsense-mediated decay|translation|translation|translational initiation|translational elongation|translational termination|SRP-dependent cotranslational protein targeting to membrane|gene expression|viral process|RNA metabolic process|mRNA metabolic process|viral life cycle|viral transcription|cellular protein metabolic process|cellular response to int…	RNA binding|structural constituent of ribosome|poly(A) RNA binding|	5	-4.2	37.9	5	-2.9	20.5	-4	-6.5	-2.8	56.3	1.35e-05	1
8189	SYMPK	symplekin	nucleus|nucleoplasm|cytoplasm|cytoskeleton|plasma membrane|tight junction|	mRNA polyadenylation|cell adhesion|positive regulation of protein dephosphorylation|	protein binding|	5	-5.4	42.9	5	-2.1	17.7	-2.3	-7	-1.8	55.5	1.75e-05	1
2618	GART	phosphoribosylglycinamide formyltransferase, phosphoribosylglycinamide synthetase, phosphoribosylaminoimidazole synthetase	cytosol|extracellular vesicular exosome|	brainstem development|purine nucleobase metabolic process|'de novo' IMP biosynthetic process|glycine metabolic process|purine nucleobase biosynthetic process|purine ribonucleoside monophosphate biosynthetic process|response to organic substance|response to inorganic substance|cerebellum development|cerebral cortex development|methylation|small molecule metabolic process|tetrahydrofolate biosynthe…	phosphoribosylamine-glycine ligase activity|phosphoribosylformylglycinamidine cyclo-ligase activity|phosphoribosylglycinamide formyltransferase activity|ATP binding|methyltransferase activity|metal ion binding|	5	-4.9	50.5	5	-1.9	8.52	-4.8	-8.3	-3.8	55.3	1.8e-05	1
537	ATP6AP1	ATPase, H+ transporting, lysosomal accessory protein 1	vacuolar membrane|integral component of membrane|proton-transporting two-sector ATPase complex|proton-transporting V-type ATPase, V1 domain|extracellular vesicular exosome|	ATP hydrolysis coupled proton transport|proton transport|positive regulation of osteoblast differentiation|positive regulation of bone resorption|pH reduction|positive regulation of exocytosis|establishment of organelle localization|positive regulation of ERK1 and ERK2 cascade|positive regulation of osteoclast development|	transporter activity|ATP binding|Rab GTPase binding|proton-transporting ATP synthase activity, rotational mechanism|proton-transporting ATPase activity, rotational mechanism|	5	-4.3	44.3	5	-2.2	14.3	-4.2	-6.2	-2.1	55	1.9e-05	1
10199	MPHOSPH10	M-phase phosphoprotein 10 (U3 small nucleolar ribonucleoprotein)	chromosome|nucleolus|small nucleolar ribonucleoprotein complex|	RNA splicing, via transesterification reactions|rRNA processing|RNA processing|RNA splicing|negative regulation of phosphatase activity|	protein binding|poly(A) RNA binding|	5	-5.3	24.5	5	-4.6	31.4	-5.2	-9.2	-4.2	55	1.9e-05	1
5093	PCBP1	poly(rC) binding protein 1	nucleoplasm|cytoplasm|membrane|ribonucleoprotein complex|extracellular vesicular exosome|	mRNA splicing, via spliceosome|RNA splicing|gene expression|	single-stranded DNA binding|RNA binding|protein binding|poly(A) RNA binding|	5	-4.8	31.4	5	-3	26.2	-4.7	-7.4	-2.6	54.9	1.9e-05	1
5425	POLD2	polymerase (DNA directed), delta 2, accessory subunit	nucleus|nucleoplasm|delta DNA polymerase complex|	mitotic cell cycle|telomere maintenance via recombination|telomere maintenance|DNA replication|DNA strand elongation involved in DNA replication|DNA repair|transcription-coupled nucleotide-excision repair|base-excision repair|nucleotide-excision repair|nucleotide-excision repair, DNA gap filling|telomere maintenance via semi-conservative replication|	DNA binding|DNA-directed DNA polymerase activity|protein binding|	5	-4	28.5	5	-3.8	26.9	-3.9	-6.3	-2.9	54.9	1.9e-05	1
3838	KPNA2	karyopherin alpha 2 (RAG cohort 1, importin alpha 1)	nucleus|nucleoplasm|cytoplasm|cytosol|membrane|	regulation of DNA recombination|mitotic G2 phase|DNA metabolic process|NLS-bearing protein import into nucleus|viral process|cytokine-mediated signaling pathway|	protein binding|nuclear localization sequence binding|protein transporter activity|histone deacetylase binding|poly(A) RNA binding|	5	-2.9	32.7	5	-1.9	24.6	-2.7	-4.2	-2	54.6	2e-05	1
6124	RPL4	ribosomal protein L4	nucleus|nucleolus|cytoplasm|cytosol|membrane|cytosolic large ribosomal subunit|ribonucleoprotein complex|extracellular vesicular exosome|	nuclear-transcribed mRNA catabolic process, nonsense-mediated decay|translation|translation|translational initiation|translational elongation|translational termination|SRP-dependent cotranslational protein targeting to membrane|gene expression|viral process|RNA metabolic process|mRNA metabolic process|viral life cycle|viral transcription|cellular protein metabolic process|	RNA binding|structural constituent of ribosome|protein binding|poly(A) RNA binding|	5	-3.5	31.4	5	-3.6	23.5	-3.6	-5.5	-3	54.4	2.05e-05	1
79871	RPAP2	RNA polymerase II associated protein 2	nucleus|nucleolus|cytoplasm|DNA-directed RNA polymerase II, holoenzyme|	snRNA transcription|dephosphorylation of RNA polymerase II C-terminal domain|	CTD phosphatase activity|metal ion binding|	5	-5.2	34.8	5	-3.4	21.8	-5.1	-7.9	-3	53.8	2.45e-05	1
51388	NIP7	NIP7, nucleolar pre-rRNA processing protein	nucleolus|	ribosome assembly|	protein binding|poly(A) RNA binding|	5	-4.7	48.8	5	-1.6	9.88	-4.6	-7.9	-3.4	53.7	2.5e-05	1
6157	RPL27A	ribosomal protein L27a	cytosol|membrane|cytosolic large ribosomal subunit|	nuclear-transcribed mRNA catabolic process, nonsense-mediated decay|translation|translation|translational initiation|translational elongation|translational termination|SRP-dependent cotranslational protein targeting to membrane|gene expression|viral process|RNA metabolic process|mRNA metabolic process|viral life cycle|viral transcription|cellular protein metabolic process|	RNA binding|structural constituent of ribosome|protein binding|poly(A) RNA binding|	5	-4.1	35.2	5	-2.9	20.6	-4	-6.4	-2.4	53.7	2.5e-05	1
6144	RPL21	ribosomal protein L21	nucleolus|cytoplasm|cytosol|membrane|cytosolic large ribosomal subunit|	nuclear-transcribed mRNA catabolic process, nonsense-mediated decay|translation|translation|translational initiation|translational elongation|translational termination|SRP-dependent cotranslational protein targeting to membrane|gene expression|viral process|RNA metabolic process|mRNA metabolic process|viral life cycle|viral transcription|cellular protein metabolic process|	RNA binding|structural constituent of ribosome|poly(A) RNA binding|	5	-4.1	41.7	5	-2.2	15.1	-3.9	-5.9	-2.2	53.5	2.55e-05	1
144108	SPTY2D1	SPT2, Suppressor of Ty, domain containing 1 (S. cerevisiae)	cellular_component|	biological_process|	molecular_function|	5	-3.4	28.2	5	-3	26.1	-3.2	-5	-2.3	53.5	2.55e-05	1
527	ATP6V0C	ATPase, H+ transporting, lysosomal 16kDa, V0 subunit c	lysosomal membrane|endosome membrane|integral component of membrane|phagocytic vesicle membrane|proton-transporting V-type ATPase, V0 domain|extracellular vesicular exosome|	cellular iron ion homeostasis|insulin receptor signaling pathway|ATP hydrolysis coupled proton transport|proton transport|viral process|positive regulation of Wnt signaling pathway|transferrin transport|interaction with host|transmembrane transport|phagosome maturation|	protein binding|ubiquitin protein ligase binding|proton-transporting ATP synthase activity, rotational mechanism|proton-transporting ATPase activity, rotational mechanism|	5	-4.1	41.5	5	-2.1	15.7	-3.9	-6.1	-2.7	53.4	2.55e-05	1
1268	CNR1	cannabinoid receptor 1 (brain)	plasma membrane|integral component of plasma membrane|	positive regulation of acute inflammatory response to antigenic stimulus|G-protein coupled receptor signaling pathway, coupled to cyclic nucleotide second messenger|adenylate cyclase-modulating G-protein coupled receptor signaling pathway|spermatogenesis|aging|response to nutrient|memory|positive regulation of neuron projection development|sensory perception of pain|positive regulation of fever g…	cannabinoid receptor activity|drug binding|	4	-5.5	23.8	5	-5.7	29.8	-5.7	-10.1	-4.9	53.1	2.55e-05	1
6194	RPS6	ribosomal protein S6	nucleus|nucleolus|cytoplasm|cytosol|small ribosomal subunit|membrane|cytosolic small ribosomal subunit|cytosolic small ribosomal subunit|dendrite|ribonucleoprotein complex|cytoplasmic ribonucleoprotein granule|cell body|	nuclear-transcribed mRNA catabolic process, nonsense-mediated decay|rRNA processing|translation|translation|translational initiation|translational elongation|translational termination|SRP-dependent cotranslational protein targeting to membrane|insulin receptor signaling pathway|gene expression|viral process|RNA metabolic process|mRNA metabolic process|viral life cycle|viral transcription|TOR sign…	structural constituent of ribosome|protein binding|protein kinase binding|poly(A) RNA binding|	5	-3.4	26.8	5	-3.3	26.5	-3.4	-5.3	-2.8	53	2.7e-05	1
7520	XRCC5	X-ray repair complementing defective repair in Chinese hamster cells 5 (double-strand-break rejoining)	nuclear telomere cap complex|nuclear chromosome, telomeric region|nucleus|nucleoplasm|cytosol|membrane|Ku70:Ku80 complex|nonhomologous end joining complex|	telomere maintenance|DNA repair|double-strand break repair|double-strand break repair via nonhomologous end joining|double-strand break repair via nonhomologous end joining|DNA recombination|transcription, DNA-templated|brain development|cell proliferation|viral process|positive regulation of type I interferon production|DNA duplex unwinding|DNA duplex unwinding|response to drug|innate immune res…	DNA binding|damaged DNA binding|double-stranded DNA binding|double-stranded telomeric DNA binding|ATP-dependent DNA helicase activity|protein binding|ATP binding|protein C-terminus binding|ubiquitin protein ligase binding|telomeric DNA binding|transcription regulatory region DNA binding|poly(A) RNA binding|5'-deoxyribose-5-phosphate lyase activity|	5	-4.9	47	5	-2.3	9.24	-4.8	-8.2	-3.6	53	2.7e-05	1
6208	RPS14	ribosomal protein S14	nucleolus|mitochondrion|cytosol|membrane|cytosolic small ribosomal subunit|extracellular vesicular exosome|	ribosomal small subunit assembly|ribosomal small subunit assembly|negative regulation of transcription from RNA polymerase II promoter|nuclear-transcribed mRNA catabolic process, nonsense-mediated decay|translation|translation|translation|translational initiation|translational elongation|translational termination|regulation of translation|SRP-dependent cotranslational protein targeting to membran…	RNA binding|structural constituent of ribosome|poly(A) RNA binding|translation regulator activity|mRNA 5'-UTR binding|	4	-4	26.9	5	-3.5	26.9	-3.8	-6.4	-2.9	52.9	2.75e-05	1
6130	RPL7A	ribosomal protein L7a	nucleus|cytosol|membrane|cytosolic large ribosomal subunit|polysomal ribosome|extracellular vesicular exosome|	nuclear-transcribed mRNA catabolic process, nonsense-mediated decay|translation|translation|translational initiation|translational elongation|translational termination|SRP-dependent cotranslational protein targeting to membrane|gene expression|viral process|RNA metabolic process|mRNA metabolic process|viral life cycle|viral transcription|ribosome biogenesis|cellular protein metabolic process|	RNA binding|structural constituent of ribosome|protein binding|poly(A) RNA binding|	5	-2.9	22.8	5	-3.5	31.2	-3.4	-5.3	-2.9	52.8	2.8e-05	1
54606	DDX56	DEAD (Asp-Glu-Ala-Asp) box helicase 56	nucleolus|membrane|	ATP catabolic process|rRNA processing|	ATP-dependent RNA helicase activity|ATP binding|poly(A) RNA binding|	5	-3	25.4	5	-3.5	28.3	-3.4	-5	-2.4	52.6	2.95e-05	1
8178	ELL	elongation factor RNA polymerase II	nucleoplasm|transcription elongation factor complex|Cajal body|nuclear speck|	in utero embryonic development|transcription from RNA polymerase II promoter|transcription elongation from RNA polymerase II promoter|gene expression|negative regulation of phosphatase activity|viral process|positive regulation of DNA-templated transcription, elongation|positive regulation of viral transcription|	protein binding|phosphatase binding|	5	-3	15	5	-4.6	39.4	-4.4	-7	-2.7	51.8	3.4e-05	1
9878	TOX4	TOX high mobility group box family member 4	chromatin|nucleus|PTW/PP1 phosphatase complex|	None	DNA binding|protein binding|	5	-5.2	43.5	5	-2.1	13.5	-5.1	-7.2	-1.9	51.8	3.4e-05	1
23636	NUP62	nucleoporin 62kDa	spindle pole|nuclear envelope|nuclear envelope|nuclear pore|nuclear pore|cytoplasm|ribonucleoprotein complex|nucleocytoplasmic shuttling complex|nuclear membrane|intracellular membrane-bounded organelle|pore complex|	mitotic cell cycle|carbohydrate metabolic process|transcription, DNA-templated|transcription, DNA-templated|nucleocytoplasmic transport|mitotic nuclear envelope disassembly|cell surface receptor signaling pathway|cell surface receptor signaling pathway|cell surface receptor signaling pathway|cell aging|cell death|cell death|negative regulation of cell proliferation|negative regulation of cell pro…	chromatin binding|nucleocytoplasmic transporter activity|protein binding|structural constituent of nuclear pore|receptor signaling complex scaffold activity|receptor signaling complex scaffold activity|SH2 domain binding|SH2 domain binding|ubiquitin binding|ubiquitin binding|thyroid hormone receptor binding|thyroid hormone receptor binding|PTB domain binding|	5	-3.5	27	5	-2.4	27.1	-3.2	-5	-2.3	51.7	3.5e-05	1
6156	RPL30	ribosomal protein L30	nucleus|cytoplasm|cytosol|membrane|cytosolic large ribosomal subunit|cytosolic large ribosomal subunit|extracellular vesicular exosome|	nuclear-transcribed mRNA catabolic process, nonsense-mediated decay|translation|translation|translational initiation|translational elongation|translational termination|SRP-dependent cotranslational protein targeting to membrane|gene expression|viral process|RNA metabolic process|mRNA metabolic process|viral life cycle|viral transcription|cellular protein metabolic process|	RNA binding|structural constituent of ribosome|structural constituent of ribosome|protein binding|poly(A) RNA binding|	5	-5.6	31.6	5	-3.7	22.8	-5.5	-8.7	-3.4	51.7	3.5e-05	1
51608	GET4	golgi to ER traffic protein 4 homolog (S. cerevisiae)	cytosol|BAT3 complex|	transport|tail-anchored membrane protein insertion into ER membrane|	None	5	2.1	16	5	2.9	37.1	2.7	1.8	4.2	51.6	3.75e-05	1
6142	RPL18A	ribosomal protein L18a	cytosol|membrane|cytosolic large ribosomal subunit|	nuclear-transcribed mRNA catabolic process, nonsense-mediated decay|translation|translation|translational initiation|translational elongation|translational termination|SRP-dependent cotranslational protein targeting to membrane|gene expression|viral process|RNA metabolic process|mRNA metabolic process|viral life cycle|viral transcription|cellular protein metabolic process|	RNA binding|structural constituent of ribosome|poly(A) RNA binding|	5	-4.5	32.4	5	-2.6	22.5	-4.3	-6.7	-2.2	51.6	3.75e-05	1
158	ADSL	adenylosuccinate lyase	mitochondrion|cytosol|	response to hypoxia|purine nucleobase metabolic process|purine nucleotide biosynthetic process|AMP biosynthetic process|'de novo' IMP biosynthetic process|response to nutrient|metabolic process|aerobic respiration|purine ribonucleoside monophosphate biosynthetic process|response to muscle activity|response to starvation|'de novo' AMP biosynthetic process|small molecule metabolic process|protein t…	N6-(1,2-dicarboxyethyl)AMP AMP-lyase (fumarate-forming) activity|N6-(1,2-dicarboxyethyl)AMP AMP-lyase (fumarate-forming) activity|(S)-2-(5-amino-1-(5-phospho-D-ribosyl)imidazole-4-carboxamido)succinate AMP-lyase (fumarate-forming) activity|	5	-2.3	23.4	5	-2.8	29.3	-2.6	-4.1	-2.1	51.5	3.75e-05	1
79039	DDX54	DEAD (Asp-Glu-Ala-Asp) box polypeptide 54	nucleus|nucleolus|membrane|	ATP catabolic process|ATP catabolic process|transcription, DNA-templated|regulation of transcription, DNA-templated|RNA processing|RNA metabolic process|intracellular estrogen receptor signaling pathway|	transcription corepressor activity|ATP-dependent RNA helicase activity|receptor binding|ATP binding|estrogen receptor binding|poly(A) RNA binding|	10	-3.9	25	10	-3.7	27	-3.8	-5.9	-2.9	51.5	3.75e-05	1
5686	PSMA5	proteasome (prosome, macropain) subunit, alpha type, 5	proteasome complex|nucleus|nucleoplasm|cytoplasm|cytosol|proteasome core complex|proteasome core complex, alpha-subunit complex|extracellular vesicular exosome|	G1/S transition of mitotic cell cycle|protein polyubiquitination|mitotic cell cycle|antigen processing and presentation of peptide antigen via MHC class I|antigen processing and presentation of exogenous peptide antigen via MHC class I, TAP-dependent|regulation of cellular amino acid metabolic process|apoptotic process|DNA damage response, signal transduction by p53 class mediator resulting in ce…	threonine-type endopeptidase activity|protein binding|	5	-2.9	14.2	5	-2.9	37.5	-2.9	-4.5	-2.2	51.3	3.9e-05	1
55759	WDR12	WD repeat domain 12	nucleoplasm|nucleolus|preribosome, large subunit precursor|PeBoW complex|	maturation of LSU-rRNA from tricistronic rRNA transcript (SSU-rRNA, 5.8S rRNA, LSU-rRNA)|maturation of 5.8S rRNA from tricistronic rRNA transcript (SSU-rRNA, 5.8S rRNA, LSU-rRNA)|Notch signaling pathway|cell proliferation|ribosomal large subunit biogenesis|	protein binding|ribonucleoprotein complex binding|	5	-3.7	16	5	-3.9	35.3	-3.8	-6.2	-2.8	50.9	4.45e-05	1
55226	NAT10	N-acetyltransferase 10 (GCN5-related)	nucleus|nucleolus|membrane|	biological_process|metabolic process|	ATP binding|N-acetyltransferase activity|poly(A) RNA binding|	5	-4.8	39.8	5	-1.8	16.7	-4.7	-7.2	-2.5	50.6	4.8e-05	1
26747	NUFIP1	nuclear fragile X mental retardation protein interacting protein 1	nucleus|perichromatin fibrils|nucleolus|transcription elongation factor complex|nuclear matrix|cytosolic ribosome|presynaptic active zone|pre-snoRNP complex|	box C/D snoRNP assembly|RNA processing|positive regulation of transcription from RNA polymerase II promoter|	DNA binding|RNA binding|protein binding|snoRNA binding|protein binding, bridging|identical protein binding|metal ion binding|	5	-4.3	39.7	5	-2.6	13.4	-4.2	-7.3	-3.2	50.6	4.8e-05	1
6240	RRM1	ribonucleotide reductase M1	nuclear envelope|nucleoplasm|cytoplasm|cytosol|ribonucleoside-diphosphate reductase complex|cell projection|neuronal cell body|extracellular vesicular exosome|	mitotic cell cycle|pyrimidine nucleobase metabolic process|DNA replication|male gonad development|deoxyribonucleotide biosynthetic process|response to ionizing radiation|nucleobase-containing small molecule interconversion|cell proliferation in forebrain|small molecule metabolic process|protein heterotetramerization|nucleobase-containing small molecule metabolic process|oxidation-reduction proces…	ribonucleoside-diphosphate reductase activity, thioredoxin disulfide as acceptor|protein binding|ATP binding|	5	-3.2	5.85	5	-3.3	45.1	-3.3	-5.7	-2.8	50.5	4.85e-05	1
11169	WDHD1	WD repeat and HMG-box DNA binding protein 1	chromosome, centromeric region|nucleus|nucleoplasm|cytoplasm|	RNA processing|regulation of chromosome organization|heterochromatin maintenance|	DNA binding|chromatin binding|RNA binding|protein binding|RNA polymerase binding|	5	-2.4	18.3	5	-3.2	34	-3.1	-4.8	-2.3	50.5	4.85e-05	1
140576	S100A16	S100 calcium binding protein A16	nucleolus|cytoplasm|cytosol|plasma membrane|extracellular vesicular exosome|	response to calcium ion|	calcium ion binding|protein homodimerization activity|poly(A) RNA binding|	4	-5.2	24.8	4	-4.7	26.2	-5.1	-9.4	-4.3	50.3	5e-05	1
6143	RPL19	ribosomal protein L19	nucleolus|cytoplasm|cytosol|membrane|cytosolic large ribosomal subunit|cytosolic large ribosomal subunit|	nuclear-transcribed mRNA catabolic process, nonsense-mediated decay|translation|translation|translational initiation|translational elongation|translational termination|SRP-dependent cotranslational protein targeting to membrane|gene expression|viral process|RNA metabolic process|mRNA metabolic process|viral life cycle|viral transcription|cellular protein metabolic process|	RNA binding|structural constituent of ribosome|structural constituent of ribosome|poly(A) RNA binding|	5	-2.7	25.1	5	-3.3	26.2	-3.1	-4.8	-2.2	50.1	5.2e-05	1
2197	FAU	Finkel-Biskis-Reilly murine sarcoma virus (FBR-MuSV) ubiquitously expressed	cellular_component|extracellular space|cytosol|small ribosomal subunit|cytosolic small ribosomal subunit|	nuclear-transcribed mRNA catabolic process, nonsense-mediated decay|innate immune response in mucosa|translation|translation|translational initiation|translational elongation|translational termination|SRP-dependent cotranslational protein targeting to membrane|biological_process|gene expression|viral process|RNA metabolic process|mRNA metabolic process|viral life cycle|viral transcription|antibac…	RNA binding|structural constituent of ribosome|poly(A) RNA binding|	5	-4.3	30.2	5	-4.1	20.2	-4.2	-7.2	-3.4	50	5.35e-05	1
221830	TWISTNB	TWIST neighbor	nucleus|nucleolus|DNA-directed RNA polymerase I complex|microtubule cytoskeleton|	transcription from RNA polymerase I promoter|	RNA polymerase I activity|	5	-3.2	20.7	5	-3.4	29.6	-3.4	-5.3	-2.8	49.7	5.75e-05	1
6136	RPL12	ribosomal protein L12	cytosol|membrane|cytosolic large ribosomal subunit|extracellular vesicular exosome|	nuclear-transcribed mRNA catabolic process, nonsense-mediated decay|translation|translation|translational initiation|translational elongation|translational termination|SRP-dependent cotranslational protein targeting to membrane|gene expression|viral process|RNA metabolic process|mRNA metabolic process|viral life cycle|viral transcription|cellular protein metabolic process|	structural constituent of ribosome|protein binding|poly(A) RNA binding|	5	-2.6	20	5	-3.4	31.1	-3.2	-5.2	-2.4	49.6	5.8e-05	1
6191	RPS4X	ribosomal protein S4, X-linked	cytosol|ribosome|polysome|small ribosomal subunit|membrane|cytosolic small ribosomal subunit|cytosolic small ribosomal subunit|ribonucleoprotein complex|cytoplasmic ribonucleoprotein granule|extracellular vesicular exosome|	nuclear-transcribed mRNA catabolic process, nonsense-mediated decay|translation|translation|translation|translational initiation|translational elongation|translational termination|SRP-dependent cotranslational protein targeting to membrane|multicellular organismal development|positive regulation of cell proliferation|gene expression|viral process|RNA metabolic process|mRNA metabolic process|viral…	structural constituent of ribosome|rRNA binding|poly(A) RNA binding|	5	-3.7	28.7	4	-2.8	22.6	-3.5	-5.6	-2.6	49.6	5.8e-05	1
23091	ZC3H13	zinc finger CCCH-type containing 13	None	None	protein binding|poly(A) RNA binding|metal ion binding|	5	2.9	25.6	5	2.2	25.1	2.7	1.9	4.2	49.5	6e-05	1
196051	PPAPDC1A	phosphatidic acid phosphatase type 2 domain containing 1A	plasma membrane|integral component of membrane|	Fc-gamma receptor signaling pathway involved in phagocytosis|innate immune response|phospholipid dephosphorylation|	phosphatidate phosphatase activity|	5	-4.7	23.1	5	-4.9	26.4	-4.9	-9.4	-4.2	49	6.9e-05	1
57458	TMCC3	transmembrane and coiled-coil domain family 3	integral component of membrane|	None	None	5	-5	26.4	5	-4.4	23.1	-5	-9.3	-4	48.9	7.25e-05	1
552	AVPR1A	arginine vasopressin receptor 1A	endosome|plasma membrane|integral component of plasma membrane|cytoplasmic vesicle|	regulation of systemic arterial blood pressure by vasopressin|maternal aggressive behavior|positive regulation of systemic arterial blood pressure|generation of precursor metabolites and energy|G-protein coupled receptor signaling pathway|activation of phospholipase C activity|positive regulation of cytosolic calcium ion concentration|negative regulation of female receptivity|grooming behavior|bl…	vasopressin receptor activity|protein kinase C binding|protein binding|peptide hormone binding|V1A vasopressin receptor binding|	5	-6.4	25.5	5	-5.5	24	-6.4	-11.8	-5.2	48.7	8.1e-05	1
27043	PELP1	proline, glutamate and leucine rich protein 1	nucleus|nucleolus|cytoplasm|membrane|MLL1 complex|	transcription, DNA-templated|	protein binding|poly(A) RNA binding|	5	-4.3	31.3	5	-3	19.5	-4.2	-6.9	-2.9	48.7	8.1e-05	1
55683	KANSL3	KAT8 regulatory NSL complex subunit 3	histone acetyltransferase complex|nucleus|nucleoplasm|nucleolus|intracellular membrane-bounded organelle|	chromatin organization|histone H4-K5 acetylation|histone H4-K8 acetylation|histone H4-K16 acetylation|	histone acetyltransferase activity (H4-K5 specific)|histone acetyltransferase activity (H4-K8 specific)|histone acetyltransferase activity (H4-K16 specific)|	5	2.1	15.3	5	3.2	35.3	3	2	4.7	48.5	8.65e-05	1
6155	RPL27	ribosomal protein L27	nucleus|cytosol|ribosome|membrane|cytosolic large ribosomal subunit|ribonucleoprotein complex|extracellular vesicular exosome|	nuclear-transcribed mRNA catabolic process, nonsense-mediated decay|translation|translation|translational initiation|translational elongation|translational termination|SRP-dependent cotranslational protein targeting to membrane|gene expression|viral process|RNA metabolic process|mRNA metabolic process|viral life cycle|viral transcription|cellular protein metabolic process|	structural constituent of ribosome|structural constituent of ribosome|poly(A) RNA binding|	5	-3.4	24.6	5	-3	24.7	-3.2	-5.1	-2.3	48.5	8.65e-05	1
6168	RPL37A	ribosomal protein L37a	nucleus|cytosol|cytosolic large ribosomal subunit|extracellular vesicular exosome|	nuclear-transcribed mRNA catabolic process, nonsense-mediated decay|translation|translation|translational initiation|translational elongation|translational termination|SRP-dependent cotranslational protein targeting to membrane|gene expression|viral process|RNA metabolic process|mRNA metabolic process|viral life cycle|viral transcription|cellular protein metabolic process|	structural constituent of ribosome|poly(A) RNA binding|metal ion binding|	5	-3.6	22.4	4	-3.3	26.7	-3.5	-5.5	-2.6	48.5	8.65e-05	1
81035	COLEC12	collectin sub-family member 12	collagen trimer|plasma membrane|integral component of membrane|endocytic vesicle membrane|extracellular vesicular exosome|	pattern recognition receptor signaling pathway|receptor-mediated endocytosis|phagocytosis, recognition|defense response|carbohydrate mediated signaling|innate immune response|protein homooligomerization|	scavenger receptor activity|galactose binding|signaling pattern recognition receptor activity|low-density lipoprotein particle binding|metal ion binding|	4	-4.1	22.4	4	-4.6	26.7	-4.5	-8.4	-3.7	48.4	8.95e-05	1
8208	CHAF1B	chromatin assembly factor 1, subunit B (p60)	nuclear chromatin|nucleus|nucleus|nucleoplasm|cytoplasm|cytosol|CAF-1 complex|protein complex|	DNA replication|DNA repair|DNA replication-dependent nucleosome assembly|transcription, DNA-templated|regulation of transcription, DNA-templated|protein complex assembly|cell cycle|chromatin assembly|	chromatin binding|histone binding|unfolded protein binding|	5	4.5	47.4	5	2	2.97	4.4	3.6	7.7	48.3	9.4e-05	1
51072	MEMO1	mediator of cell motility 1	nucleus|cytosol|	regulation of microtubule-based process|	protein binding|	10	-1.9	13.4	10	-3.2	38	-3.1	-4.4	-2.4	48.3	9.4e-05	1
6877	TAF5	TAF5 RNA polymerase II, TATA box binding protein (TBP)-associated factor, 100kDa	nucleus|nucleoplasm|transcription factor TFIID complex|actin cytoskeleton|transcription factor TFTC complex|intracellular membrane-bounded organelle|	DNA-templated transcription, initiation|regulation of transcription, DNA-templated|transcription from RNA polymerase II promoter|transcription initiation from RNA polymerase II promoter|transcription initiation from RNA polymerase II promoter|transcription elongation from RNA polymerase II promoter|gene expression|viral process|chromatin modification|histone acetylation|	sequence-specific DNA binding transcription factor activity|sequence-specific DNA binding transcription factor activity|histone acetyltransferase activity|protein binding|transcription regulatory region DNA binding|protein dimerization activity|	5	-5.1	34.5	5	-3	16.2	-5.1	-8.5	-2.7	48.2	9.65e-05	1
285855	RPL7L1	ribosomal protein L7-like 1	ribosome|	None	poly(A) RNA binding|	5	-4.4	24.5	5	-4.4	24	-4.4	-8.4	-3.7	48.1	0.0001	1
113829	SLC35A4	solute carrier family 35, member A4	Golgi membrane|integral component of membrane|	carbohydrate transport|proton transport|	sugar:proton symporter activity|	5	-4.9	25.6	5	-4.4	23.1	-4.9	-9.3	-3.9	48.1	0.0001	1
8562	DENR	density-regulated protein	cellular_component|	formation of translation preinitiation complex|IRES-dependent translational initiation|biological_process|ribosome disassembly|	molecular_function|translation initiation factor activity|protein binding|	5	2.4	24	5	2.5	24.4	2.4	1.9	3.9	48	0.000108	1
58490	RPRD1B	regulation of nuclear pre-mRNA domain containing 1B	nucleus|DNA-directed RNA polymerase II, holoenzyme|	transcription, DNA-templated|positive regulation of cell proliferation|regulation of cell cycle process|positive regulation of transcription from RNA polymerase II promoter|dephosphorylation of RNA polymerase II C-terminal domain|	RNA polymerase II core binding|protein binding|	5	-3	19.6	5	-3	28.8	-3	-4.6	-2.3	48	0.000108	1
6170	RPL39	ribosomal protein L39	extracellular space|cytosol|cytosolic large ribosomal subunit|cytosolic large ribosomal subunit|	nuclear-transcribed mRNA catabolic process, nonsense-mediated decay|innate immune response in mucosa|translation|translation|translational initiation|translational elongation|translational termination|SRP-dependent cotranslational protein targeting to membrane|gene expression|viral process|RNA metabolic process|mRNA metabolic process|viral life cycle|viral transcription|antibacterial humoral resp…	RNA binding|structural constituent of ribosome|structural constituent of ribosome|	5	-3.8	19.3	5	-4.8	29.8	-4.6	-8.2	-3.6	47.9	0.000115	1
2957	GTF2A1	general transcription factor IIA, 1, 19/37kDa	nucleus|nucleoplasm|transcription factor TFIIA complex|cytoplasm|	regulation of transcription, DNA-templated|transcription from RNA polymerase II promoter|transcription from RNA polymerase II promoter|transcription initiation from RNA polymerase II promoter|transcription elongation from RNA polymerase II promoter|gene expression|viral process|	DNA binding|transcription coactivator activity|protein binding|transcription factor binding|TBP-class protein binding|protein heterodimerization activity|	5	-3	15.9	5	-5	34.6	-4.9	-7.8	-2.6	47.4	0.000143	0
26019	UPF2	UPF2 regulator of nonsense transcripts homolog (yeast)	nucleus|cytoplasm|cytosol|exon-exon junction complex|perinuclear region of cytoplasm|	nuclear-transcribed mRNA catabolic process, nonsense-mediated decay|nuclear-transcribed mRNA catabolic process, nonsense-mediated decay|liver development|mRNA export from nucleus|gene expression|RNA metabolic process|mRNA metabolic process|organ regeneration|	RNA binding|protein binding|	5	3.4	23.5	5	2.4	25.8	3.1	2.1	4.9	47.4	0.000143	0
57050	UTP3	UTP3, small subunit (SSU) processome component, homolog (S. cerevisiae)	nucleus|nucleolus|	brain development|chromatin modification|	poly(A) RNA binding|	5	-3.5	28.5	5	-2.3	21.1	-3.3	-5.2	-2.5	47.3	0.000149	0
400569	MED11	mediator complex subunit 11	mediator complex|	regulation of transcription from RNA polymerase II promoter|transcription from RNA polymerase II promoter|	RNA polymerase II transcription cofactor activity|protein binding|	5	-4.4	23.2	5	-4.3	24.3	-4.4	-7.8	-3.8	47.1	0.000157	0
79837	PIP4K2C	phosphatidylinositol-5-phosphate 4-kinase, type II, gamma	cytoplasm|membrane|extracellular vesicular exosome|	phosphatidylinositol phosphorylation|	ATP binding|1-phosphatidylinositol-5-phosphate 4-kinase activity|identical protein binding|	5	-4.4	23.2	5	-4.7	24.4	-4.6	-8.6	-4	47.1	0.000157	0
65083	NOL6	nucleolar protein 6 (RNA-associated)	condensed nuclear chromosome|nucleus|nucleolus|nucleolus|mitochondrion|	rRNA processing|	RNA binding|poly(A) RNA binding|	5	-2.8	5.3	4	-4.4	43.4	-4.3	-7.9	-3	46.9	0.000165	0
6204	RPS10	ribosomal protein S10	nucleolus|cytoplasm|cytosol|ribosome|membrane|cytosolic small ribosomal subunit|extracellular vesicular exosome|	nuclear-transcribed mRNA catabolic process, nonsense-mediated decay|translation|translation|translational initiation|translational elongation|translational termination|SRP-dependent cotranslational protein targeting to membrane|gene expression|viral process|RNA metabolic process|mRNA metabolic process|viral life cycle|viral transcription|cellular protein metabolic process|	protein binding|poly(A) RNA binding|	5	-4.7	24	5	-4.6	23	-4.6	-8.6	-4	46.6	0.000182	0
100529239	RPS10-NUDT3	RPS10-NUDT3 readthrough	None	None	None	5	-4.7	24	5	-4.6	23	-4.6	-8.6	-4	46.6	0.000182	0
9818	NUPL1	nucleoporin like 1	nuclear envelope|nuclear pore|nuclear membrane|	mitotic cell cycle|carbohydrate metabolic process|nucleocytoplasmic transport|mitotic nuclear envelope disassembly|hexose transport|regulation of glucose transport|protein transport|glucose transport|viral process|cytokine-mediated signaling pathway|small molecule metabolic process|mRNA transport|transmembrane transport|	nucleocytoplasmic transporter activity|protein binding|	5	-4.3	44.4	5	-1.3	6.29	-4.2	-6.9	-2.3	46.5	0.000184	0
5609	MAP2K7	mitogen-activated protein kinase kinase 7	nucleus|cytoplasm|cytosol|	toll-like receptor signaling pathway|MyD88-dependent toll-like receptor signaling pathway|MyD88-independent toll-like receptor signaling pathway|apoptotic process|response to stress|signal transduction|JNK cascade|activation of JUN kinase activity|peptidyl-tyrosine phosphorylation|toll-like receptor 2 signaling pathway|toll-like receptor 3 signaling pathway|toll-like receptor 4 signaling pathway|…	magnesium ion binding|protein serine/threonine kinase activity|MAP kinase kinase activity|protein tyrosine kinase activity|protein binding|ATP binding|protein C-terminus binding|JUN kinase kinase activity|protein kinase binding|protein phosphatase binding|mitogen-activated protein kinase kinase kinase binding|	5	-4.5	23.1	5	-5.2	24	-5.1	-9.5	-4.3	46.4	0.000187	0
9675	TTI1	TELO2 interacting protein 1	cytoplasm|TORC1 complex|TORC2 complex|	regulation of TOR signaling|	protein binding|	5	5.3	31.5	5	2.3	20	5.1	1.8	7.6	46.4	0.000187	0
11091	WDR5	WD repeat domain 5	histone acetyltransferase complex|nucleus|nucleoplasm|Ada2/Gcn5/Ada3 transcription activator complex|histone methyltransferase complex|Set1C/COMPASS complex|MLL1 complex|	skeletal system development|chromatin organization|transcription, DNA-templated|regulation of transcription, DNA-templated|histone H3 acetylation|histone H4-K5 acetylation|histone H4-K8 acetylation|histone H4-K16 acetylation|rhythmic process|histone H3-K4 methylation|	protein binding|histone methyltransferase activity (H3-K4 specific)|histone acetyltransferase activity (H4-K5 specific)|histone acetyltransferase activity (H4-K8 specific)|histone acetyltransferase activity (H4-K16 specific)|	5	-2.8	18.4	5	-3.4	29.2	-3.3	-5	-2.3	46.4	0.000187	0
57634	EP400	E1A binding protein p400	Swr1 complex|nucleoplasm|nuclear speck|NuA4 histone acetyltransferase complex|	chromatin organization|histone H4 acetylation|histone H2A acetylation|	DNA binding|chromatin binding|helicase activity|ATP binding|	5	5	40	5	1.4	13	4.8	1.5	6.8	46.3	0.000189	0
6152	RPL24	ribosomal protein L24	cytosol|membrane|cytosolic large ribosomal subunit|extracellular vesicular exosome|	nuclear-transcribed mRNA catabolic process, nonsense-mediated decay|translation|translation|translational initiation|translational elongation|translational termination|SRP-dependent cotranslational protein targeting to membrane|gene expression|viral process|RNA metabolic process|mRNA metabolic process|viral life cycle|viral transcription|cellular protein metabolic process|	RNA binding|structural constituent of ribosome|poly(A) RNA binding|	4	-3.6	22.1	5	-3.2	25.1	-3.4	-5.6	-2.5	46.3	0.000189	0
10458	BAIAP2	BAI1-associated protein 2	ruffle|cytoplasm|cytosol|cytosol|plasma membrane|actin cytoskeleton|filopodium|neuron projection|extracellular vesicular exosome|	axonogenesis|insulin receptor signaling pathway|regulation of cell shape|response to bacterium|dendrite development|regulation of actin cytoskeleton organization|Fc-gamma receptor signaling pathway involved in phagocytosis|innate immune response|filopodium assembly|regulation of synaptic plasticity|actin filament bundle assembly|actin crosslink formation|	protein binding|protein C-terminus binding|cytoskeletal adaptor activity|SH3 domain binding|identical protein binding|proline-rich region binding|	5	-4.8	23.4	5	-4.5	23.2	-4.7	-8.6	-4	46	0.000201	0
64921	CASD1	CAS1 domain containing 1	integral component of membrane|	None	None	4	-5.1	24.1	4	-6.8	23.1	-6.8	-12.7	-6	46	0.000201	0
84135	UTP15	UTP15, U3 small nucleolar ribonucleoprotein, homolog (S. cerevisiae)	nucleolus|cytoplasm|	rRNA processing|	poly(A) RNA binding|	5	-4.7	25	5	-4	22	-4.6	-8.1	-3.6	46	0.000201	0
56940	DUSP22	dual specificity phosphatase 22	nucleus|cytoplasm|	negative regulation of transcription from RNA polymerase II promoter|inactivation of MAPK activity|protein dephosphorylation|apoptotic process|transforming growth factor beta receptor signaling pathway|multicellular organismal development|cell proliferation|peptidyl-tyrosine dephosphorylation|regulation of cell proliferation|positive regulation of JNK cascade|	protein tyrosine phosphatase activity|protein tyrosine/serine/threonine phosphatase activity|	5	-4.9	23	5	-5.1	23.4	-5	-9.6	-4.5	45.9	0.000204	0
646643	SBK2	SH3 domain binding kinase family, member 2	None	protein phosphorylation|signal transduction by phosphorylation|	protein serine/threonine kinase activity|ATP binding|	5	-5.3	23.2	5	-4.5	23.3	-5.3	-9.6	-4.3	45.8	0.000211	0
10083	USH1C	Usher syndrome 1C (autosomal recessive, severe)	photoreceptor outer segment|photoreceptor inner segment|cytoplasm|cytosol|cytoskeleton|plasma membrane|stereocilium|apical part of cell|synapse|	G2/M transition of mitotic cell cycle|sensory perception of sound|parallel actin filament bundle assembly|inner ear morphogenesis|auditory receptor cell differentiation|photoreceptor cell maintenance|sensory perception of light stimulus|equilibrioception|	protein binding|spectrin binding|	5	-4.5	23.1	5	-4.3	23.2	-4.4	-8.6	-3.8	45.8	0.000211	0
79148	MMP28	matrix metallopeptidase 28	proteinaceous extracellular matrix|	proteolysis|	metalloendopeptidase activity|calcium ion binding|zinc ion binding|	5	-5	23.1	5	-5.1	22.8	-5.1	-9.7	-4.6	45.4	0.000232	0
22847	ZNF507	zinc finger protein 507	nucleus|	transcription, DNA-templated|regulation of transcription, DNA-templated|	DNA binding|metal ion binding|	5	-4.8	23.1	5	-5.6	22.8	-5.6	-10.6	-4.8	45.2	0.000246	0
10001	MED6	mediator complex subunit 6	nucleus|nucleoplasm|membrane|mediator complex|mediator complex|	regulation of transcription from RNA polymerase II promoter|transcription initiation from RNA polymerase II promoter|gene expression|stem cell maintenance|positive regulation of transcription from RNA polymerase II promoter|	RNA polymerase II transcription cofactor activity|DNA binding|transcription coactivator activity|transcription factor binding|	5	-5.9	23	5	-5.1	22.9	-5.9	-10.5	-4.9	45.1	0.00025	0
5436	POLR2G	polymerase (RNA) II (DNA directed) polypeptide G	cytoplasmic mRNA processing body|nucleus|nucleoplasm|DNA-directed RNA polymerase II, core complex|nucleolus|	nuclear-transcribed mRNA catabolic process, exonucleolytic|mRNA splicing, via spliceosome|DNA repair|transcription-coupled nucleotide-excision repair|nucleotide-excision repair|transcription from RNA polymerase II promoter|transcription from RNA polymerase II promoter|transcription initiation from RNA polymerase II promoter|transcription initiation from RNA polymerase II promoter|transcription el…	single-stranded DNA binding|single-stranded RNA binding|DNA-directed RNA polymerase activity|translation initiation factor binding|	5	-2.9	14.1	5	-3.2	31.6	-3.1	-5.1	-2.5	45.1	0.00025	0
3097	HIVEP2	human immunodeficiency virus type I enhancer binding protein 2	nucleus|	transcription, DNA-templated|regulation of transcription, DNA-templated|	DNA binding|metal ion binding|	5	-6.2	22.9	5	-4.4	23.3	-6.1	-11.6	-5.1	44.9	0.000255	0
170680	PSORS1C2	psoriasis susceptibility 1 candidate 2	cellular_component|extracellular region|	biological_process|	molecular_function|	5	-4.6	23.1	5	-5.5	22.6	-5.5	-10.7	-4.7	44.9	0.000255	0
3692	EIF6	eukaryotic translation initiation factor 6	nucleus|lamin filament|cytoplasm|extracellular vesicular exosome|	ribosomal subunit export from nucleus|translational initiation|mature ribosome assembly|ribosomal large subunit biogenesis|	translation initiation factor activity|protein binding|ribosome binding|ribosomal large subunit binding|	5	-2.7	16.2	5	-4.1	31.3	-4	-6.3	-2.1	44.8	0.000259	0
219541	MED19	mediator complex subunit 19	nucleus|mediator complex|	regulation of transcription from RNA polymerase II promoter|transcription from RNA polymerase II promoter|	RNA polymerase II transcription cofactor activity|	5	-2.6	14.6	5	-3.5	31.9	-3.4	-5.4	-2.5	44.8	0.000259	0
6416	MAP2K4	mitogen-activated protein kinase kinase 4	nucleus|cytosol|dendrite cytoplasm|perikaryon|	toll-like receptor signaling pathway|MyD88-dependent toll-like receptor signaling pathway|MyD88-independent toll-like receptor signaling pathway|apoptotic process|signal transduction|JNK cascade|activation of JUN kinase activity|peptidyl-tyrosine phosphorylation|toll-like receptor 2 signaling pathway|toll-like receptor 3 signaling pathway|toll-like receptor 4 signaling pathway|toll-like receptor …	protein kinase activity|protein serine/threonine kinase activity|protein tyrosine kinase activity|protein binding|ATP binding|JUN kinase kinase activity|mitogen-activated protein kinase kinase kinase binding|	5	-5.8	22.6	5	-5.7	22.5	-5.7	-10.6	-5.2	44.7	0.000261	0
6154	RPL26	ribosomal protein L26	cytosol|membrane|cytosolic large ribosomal subunit|extracellular vesicular exosome|	nuclear-transcribed mRNA catabolic process, nonsense-mediated decay|rRNA processing|translation|translation|translational initiation|translational elongation|translational termination|SRP-dependent cotranslational protein targeting to membrane|gene expression|viral process|RNA metabolic process|mRNA metabolic process|viral life cycle|viral transcription|ribosomal large subunit biogenesis|cellular…	RNA binding|structural constituent of ribosome|poly(A) RNA binding|	5	-3.1	6.94	5	-4.2	39.4	-4.1	-7.2	-3	44.7	0.000261	0
4850	CNOT4	CCR4-NOT transcription complex, subunit 4	nucleus|cytosol|CCR4-NOT complex|	nuclear-transcribed mRNA catabolic process, deadenylation-dependent decay|nuclear-transcribed mRNA poly(A) tail shortening|gene expression|RNA metabolic process|mRNA metabolic process|protein autoubiquitination|	nucleotide binding|ubiquitin-protein transferase activity|protein binding|zinc ion binding|ligase activity|poly(A) RNA binding|	5	-2.2	17	5	-2	28.1	-2.1	-3.2	-1.6	44.6	0.000263	0
10973	ASCC3	activating signal cointegrator 1 complex subunit 3	intracellular|nucleus|cytoplasm|Golgi apparatus|membrane|	DNA dealkylation involved in DNA repair|transcription, DNA-templated|regulation of transcription, DNA-templated|cell proliferation|DNA duplex unwinding|	protein binding|ATP binding|ATP-dependent 3'-5' DNA helicase activity|poly(A) RNA binding|	5	-3.4	19.3	5	-3.6	25.6	-3.6	-5.6	-2.9	44.4	0.00027	0
11108	PRDM4	PR domain containing 4	nucleus|	regulation of transcription, DNA-templated|transcription from RNA polymerase II promoter|signal transduction|cell proliferation|methylation|negative regulation of cell cycle|neurotrophin TRK receptor signaling pathway|	DNA binding|methyltransferase activity|zinc ion binding|	5	-5.5	22.6	5	-6.2	22.3	-6.1	-11.6	-5.4	44.3	0.000273	0
6135	RPL11	ribosomal protein L11	nucleolus|cytosol|membrane|cytosolic large ribosomal subunit|extracellular vesicular exosome|	nuclear-transcribed mRNA catabolic process, nonsense-mediated decay|rRNA processing|translation|translation|translational initiation|translational elongation|translational termination|protein targeting|SRP-dependent cotranslational protein targeting to membrane|gene expression|viral process|RNA metabolic process|mRNA metabolic process|viral life cycle|viral transcription|protein localization to n…	RNA binding|structural constituent of ribosome|protein binding|rRNA binding|poly(A) RNA binding|	5	-3.3	22.7	5	-3.8	22.5	-3.7	-5.8	-2.7	44.1	0.00028	0
2023	ENO1	enolase 1, (alpha)	phosphopyruvate hydratase complex|extracellular space|nucleus|nucleus|cytoplasm|cytosol|plasma membrane|membrane|M band|extracellular vesicular exosome|	negative regulation of transcription from RNA polymerase II promoter|carbohydrate metabolic process|glucose metabolic process|gluconeogenesis|glycolytic process|glycolytic process|transcription, DNA-templated|response to virus|negative regulation of cell growth|small molecule metabolic process|negative regulation of transcription, DNA-templated|	magnesium ion binding|DNA binding|sequence-specific DNA binding transcription factor activity|transcription corepressor activity|phosphopyruvate hydratase activity|protein binding|poly(A) RNA binding|	5	-4.3	32.3	5	-3.2	12.7	-4.3	-7.3	-2.9	43.9	0.000281	0
27341	RRP7A	ribosomal RNA processing 7 homolog A (S. cerevisiae)	None	None	nucleotide binding|poly(A) RNA binding|	5	-3.6	23.8	5	-2.2	23	-3.3	-5.1	-2.3	43.9	0.000281	0
10040	TOM1L1	target of myb1 (chicken)-like 1	cytoplasm|lysosome|endosome|Golgi stack|cytosol|endosome membrane|extracellular vesicular exosome|	intracellular protein transport|signal transduction|positive regulation of protein autophosphorylation|activation of protein kinase activity|ubiquitin-dependent protein catabolic process via the multivesicular body sorting pathway|negative regulation of mitosis|	protein binding|SH3 domain binding|protein kinase binding|clathrin binding|protein kinase activator activity|ubiquitin binding|	5	-4.6	23.1	5	-7.2	22.1	-7.1	-13.7	-6.4	43.8	0.000284	0
23404	EXOSC2	exosome component 2	exosome (RNase complex)|nucleus|nucleolus|cytoplasm|cytosol|	nuclear-transcribed mRNA catabolic process, deadenylation-dependent decay|rRNA processing|gene expression|RNA metabolic process|mRNA metabolic process|positive regulation of cell growth|exonucleolytic nuclear-transcribed mRNA catabolic process involved in deadenylation-dependent decay|RNA phosphodiester bond hydrolysis, exonucleolytic|	3'-5'-exoribonuclease activity|protein binding|7S RNA binding|	5	3.6	25.4	5	1.8	22.2	3.2	2.1	5.1	43.7	0.000287	0
57532	NUFIP2	nuclear fragile X mental retardation protein interacting protein 2	nucleus|cytoplasm|membrane|polysomal ribosome|	None	RNA binding|protein binding|poly(A) RNA binding|	5	4.5	25	5	2.5	22.2	4.2	2.2	6.4	43.5	0.000289	0
51341	ZBTB7A	zinc finger and BTB domain containing 7A	nucleus|	negative regulation of transcription from RNA polymerase II promoter|transcription, DNA-templated|multicellular organismal development|cell differentiation|negative regulation of transcription, DNA-templated|	DNA binding|histone acetyltransferase binding|metal ion binding|	10	-1.3	15.6	10	-3	33.4	-2.2	-3.5	-1.4	43.5	0.000289	0
84172	POLR1B	polymerase (RNA) I polypeptide B, 128kDa	nucleoplasm|nucleolus|DNA-directed RNA polymerase I complex|cytoplasm|	transcription from RNA polymerase I promoter|transcription initiation from RNA polymerase I promoter|transcription elongation from RNA polymerase I promoter|termination of RNA polymerase I transcription|embryo implantation|rRNA transcription|embryo development|gene expression|nucleologenesis|	DNA binding|DNA-directed RNA polymerase activity|protein binding|ribonucleoside binding|metal ion binding|	5	-4.1	29.8	5	-3.7	13.7	-4	-7.1	-3.1	42.8	0.0003	0
51343	FZR1	fizzy/cell division cycle 20 related 1 (Drosophila)	nucleus|nucleoplasm|anaphase-promoting complex|cytosol|nuclear membrane|	mitotic cell cycle|DNA repair|mitotic nuclear division|positive regulation of cell proliferation|anaphase-promoting complex-dependent proteasomal ubiquitin-dependent protein catabolic process|anaphase-promoting complex-dependent proteasomal ubiquitin-dependent protein catabolic process|G2 DNA damage checkpoint|regulation of meiosis|positive regulation of protein catabolic process|negative regulat…	protein binding|	5	-4.1	20.2	5	-4.9	23.2	-4.8	-8.7	-4	42.5	0.000308	0
10482	NXF1	nuclear RNA export factor 1	transcription export complex|nuclear pore|nucleoplasm|cytosol|nuclear speck|nuclear inclusion body|	mRNA export from nucleus|mRNA export from nucleus|gene expression|viral process|poly(A)+ mRNA export from nucleus|	nucleotide binding|mRNA binding|nucleocytoplasmic transporter activity|protein binding|poly(A) RNA binding|	10	-4.2	34.9	10	-2.5	10	-4.1	-6.5	-2.8	42.3	0.000311	0
6205	RPS11	ribosomal protein S11	cytosol|ribosome|membrane|cytosolic small ribosomal subunit|extracellular vesicular exosome|	nuclear-transcribed mRNA catabolic process, nonsense-mediated decay|translation|translation|translation|translational initiation|translational elongation|translational termination|SRP-dependent cotranslational protein targeting to membrane|gene expression|viral process|RNA metabolic process|mRNA metabolic process|viral life cycle|viral transcription|cellular protein metabolic process|	structural constituent of ribosome|protein binding|rRNA binding|poly(A) RNA binding|	5	-2.3	15.1	5	-3.8	29.9	-3.7	-5.5	-1.7	42.2	0.000312	0
55257	MRGBP	MRG/MORF4L binding protein	nucleus|nucleoplasm|H4/H2A histone acetyltransferase complex|	chromatin organization|transcription, DNA-templated|regulation of transcription, DNA-templated|chromatin modification|regulation of growth|	None	5	3.9	21.7	5	2.2	23.7	3.6	2.4	5.8	42	0.000314	0
6132	RPL8	ribosomal protein L8	cytosol|membrane|cytosolic large ribosomal subunit|	nuclear-transcribed mRNA catabolic process, nonsense-mediated decay|translation|translation|translational initiation|translational elongation|translational termination|SRP-dependent cotranslational protein targeting to membrane|gene expression|viral process|RNA metabolic process|mRNA metabolic process|viral life cycle|viral transcription|cellular protein metabolic process|	RNA binding|structural constituent of ribosome|rRNA binding|poly(A) RNA binding|	5	-2.7	17.2	5	-2.8	25.3	-2.8	-4.7	-2.3	42	0.000314	0
10399	GNB2L1	guanine nucleotide binding protein (G protein), beta polypeptide 2-like 1	phagocytic cup|nucleus|cytoplasm|mitochondrion|cytosol|cytoskeleton|small ribosomal subunit|dendrite|midbody|neuronal cell body|perikaryon|perinuclear region of cytoplasm|extracellular vesicular exosome|	positive regulation of protein phosphorylation|activation of cysteine-type endopeptidase activity involved in apoptotic process|cell cycle|gastrulation|negative regulation of gene expression|viral process|negative regulation of translation|negative regulation of Wnt signaling pathway|negative regulation of cell growth|positive regulation of cell migration|positive regulation of cAMP catabolic pro…	protein kinase C binding|receptor binding|protein binding|ion channel inhibitor activity|cysteine-type endopeptidase activator activity involved in apoptotic process|enzyme binding|protein phosphatase binding|protein tyrosine kinase inhibitor activity|receptor tyrosine kinase binding|protein complex scaffold|SH2 domain binding|protein homodimerization activity|poly(A) RNA binding|	5	3.8	19.6	5	3.8	22.8	3.8	3.2	6.2	41.9	0.000314	0
4931	NVL	nuclear VCP-like	nucleus|nucleolus|membrane|	metabolic process|	ATP binding|nucleoside-triphosphatase activity|poly(A) RNA binding|	5	-2.7	13.4	5	-3.9	30.3	-3.8	-6.4	-2.5	41.8	0.000318	0
91828	EXOC3L4	exocyst complex component 3-like 4	exocyst|	exocytosis|	None	5	-4.5	29.6	5	-2.8	14.3	-4.5	-7.9	-2.7	41.7	0.00032	0
25873	RPL36	ribosomal protein L36	nucleolus|cytoplasm|cytosol|membrane|cytosolic large ribosomal subunit|	nuclear-transcribed mRNA catabolic process, nonsense-mediated decay|translation|translation|translational initiation|translational elongation|translational termination|SRP-dependent cotranslational protein targeting to membrane|gene expression|viral process|RNA metabolic process|mRNA metabolic process|viral life cycle|viral transcription|cellular protein metabolic process|	structural constituent of ribosome|poly(A) RNA binding|	5	-5	27.7	5	-3.2	15.6	-4.9	-9.1	-3.2	41.4	0.000327	0
51514	DTL	denticleless E3 ubiquitin protein ligase homolog (Drosophila)	nucleus|chromosome|nucleolus|cytoplasm|centrosome|Cul4A-RING E3 ubiquitin ligase complex|Cul4B-RING E3 ubiquitin ligase complex|nuclear membrane|intracellular membrane-bounded organelle|	protein polyubiquitination|protein polyubiquitination|DNA replication|ubiquitin-dependent protein catabolic process|ubiquitin-dependent protein catabolic process|protein monoubiquitination|cellular response to DNA damage stimulus|response to UV|translesion synthesis|G2 DNA damage checkpoint|regulation of cell cycle|	ubiquitin-protein transferase activity|protein binding|	5	-5.7	30.3	5	-3.8	12.9	-5.6	-9.5	-3.5	41.1	0.000333	0
83732	RIOK1	RIO kinase 1	None	protein phosphorylation|	protein serine/threonine kinase activity|ATP binding|	5	-5.8	31.7	5	-3.6	11.8	-5.7	-9.5	-3.4	40.8	0.000341	0
4342	MOS	v-mos Moloney murine sarcoma viral oncogene homolog	None	MAPK cascade|activation of MAPKK activity|activation of MAPK activity|meiotic spindle organization|chromatin organization|regulation of meiosis|protein autophosphorylation|establishment of meiotic spindle orientation|negative regulation of metaphase/anaphase transition of meiotic cell cycle|	protein serine/threonine kinase activity|MAP kinase kinase kinase activity|ATP binding|	5	-4	18.4	5	-4.7	23.1	-4.6	-8.7	-3.9	40.7	0.000342	0
8886	DDX18	DEAD (Asp-Glu-Ala-Asp) box polypeptide 18	nucleolus|membrane|	ATP catabolic process|ATP catabolic process|	ATP-dependent RNA helicase activity|protein binding|ATP binding|poly(A) RNA binding|	5	-2.8	20.4	5	-3.4	21.3	-3.2	-5	-2.2	40.5	0.000347	0
5717	PSMD11	proteasome (prosome, macropain) 26S subunit, non-ATPase, 11	proteasome complex|nucleus|nucleoplasm|cytosol|membrane|proteasome accessory complex|extracellular vesicular exosome|	G1/S transition of mitotic cell cycle|protein polyubiquitination|mitotic cell cycle|antigen processing and presentation of peptide antigen via MHC class I|antigen processing and presentation of exogenous peptide antigen via MHC class I, TAP-dependent|ubiquitin-dependent protein catabolic process|regulation of cellular amino acid metabolic process|apoptotic process|DNA damage response, signal tran…	protein binding|	5	-3.9	27.9	4	-3.3	13.3	-3.9	-7.2	-3	40.4	0.000347	0
2720	GLB1	galactosidase, beta 1	cytoplasm|Golgi apparatus|lysosomal lumen|perinuclear region of cytoplasm|extracellular vesicular exosome|	carbohydrate metabolic process|glycosaminoglycan catabolic process|sphingolipid metabolic process|glycosphingolipid metabolic process|galactose catabolic process|glycosaminoglycan metabolic process|keratan sulfate metabolic process|keratan sulfate catabolic process|small molecule metabolic process|	beta-galactosidase activity|protein binding|galactoside binding|	5	-3.8	19	5	-5.1	22.9	-4.9	-9.2	-3.8	40.2	0.000351	0
5901	RAN	RAN, member RAS oncogene family	chromatin|nucleus|nuclear pore|nucleoplasm|cytoplasm|cytosol|membrane|melanosome|extracellular vesicular exosome|	ribosomal large subunit export from nucleus|ribosomal small subunit export from nucleus|GTP catabolic process|DNA metabolic process|protein export from nucleus|mitotic spindle organization|mitotic nuclear division|signal transduction|small GTPase mediated signal transduction|gene expression|viral process|viral life cycle|androgen receptor signaling pathway|positive regulation of protein binding|s…	chromatin binding|transcription coactivator activity|GTPase activity|protein binding|GTP binding|protein domain specific binding|poly(A) RNA binding|androgen receptor binding|	5	-5.9	33.4	5	-3.6	9.11	-5.8	-9.8	-3.5	40.2	0.000351	0
5437	POLR2H	polymerase (RNA) II (DNA directed) polypeptide H	nucleus|nucleoplasm|DNA-directed RNA polymerase II, core complex|DNA-directed RNA polymerase III complex|DNA-directed RNA polymerase I complex|cytosol|	mRNA splicing, via spliceosome|DNA repair|transcription-coupled nucleotide-excision repair|nucleotide-excision repair|transcription from RNA polymerase I promoter|transcription initiation from RNA polymerase I promoter|transcription elongation from RNA polymerase I promoter|termination of RNA polymerase I transcription|transcription from RNA polymerase II promoter|transcription from RNA polymeras…	RNA polymerase I activity|RNA polymerase II activity|RNA polymerase III activity|DNA binding|	5	-3.1	20.1	4	-2.2	21.7	-3	-4.7	-2	39.9	0.000359	0
84154	RPF2	ribosome production factor 2 homolog (S. cerevisiae)	nucleolus|	None	poly(A) RNA binding|	5	-6.1	28.4	5	-2.4	16.8	-6.1	-10.5	-2.9	39.9	0.000359	0
26156	RSL1D1	ribosomal L1 domain containing 1	nucleolus|membrane|	osteoblast differentiation|regulation of protein localization|	poly(A) RNA binding|	10	-3.3	14.7	10	-3.5	25.5	-3.4	-4.6	-2.4	39.6	0.000367	0
23481	PES1	pescadillo ribosomal biogenesis factor 1	condensed chromosome|nucleoplasm|nucleolus|cytoplasm|membrane|preribosome, large subunit precursor|PeBoW complex|	maturation of LSU-rRNA from tricistronic rRNA transcript (SSU-rRNA, 5.8S rRNA, LSU-rRNA)|maturation of 5.8S rRNA from tricistronic rRNA transcript (SSU-rRNA, 5.8S rRNA, LSU-rRNA)|rRNA processing|nucleolus organization|cell proliferation|cell proliferation|protein localization to organelle|ribosomal large subunit biogenesis|regulation of cell cycle|	protein binding|ribonucleoprotein complex binding|poly(A) RNA binding|	5	-2.7	18	5	-3.9	23.7	-3.8	-6.4	-3	39.3	0.000378	0
6878	TAF6	TAF6 RNA polymerase II, TATA box binding protein (TBP)-associated factor, 80kDa	nucleus|nucleoplasm|transcription factor TFIID complex|cytoplasm|transcription factor TFTC complex|MLL1 complex|	DNA-templated transcription, initiation|regulation of transcription, DNA-templated|transcription from RNA polymerase II promoter|transcription from RNA polymerase II promoter|transcription initiation from RNA polymerase II promoter|transcription initiation from RNA polymerase II promoter|transcription elongation from RNA polymerase II promoter|negative regulation of cell proliferation|gene expres…	DNA binding|sequence-specific DNA binding transcription factor activity|sequence-specific DNA binding transcription factor activity|protein binding|protein heterodimerization activity|	5	-3.5	22.2	5	-2.5	19.1	-3.3	-5.4	-2.4	39.3	0.000378	0
7979	SHFM1	split hand/foot malformation (ectrodactyly) type 1	proteasome complex|integrator complex|	double-strand break repair via homologous recombination|proteolysis|	protein binding|peptidase activity|	4	-2.1	14.5	5	-1.8	25.4	-2	-3.2	-1.4	39.2	0.000381	0
5430	POLR2A	polymerase (RNA) II (DNA directed) polypeptide A, 220kDa	nucleus|nucleus|nucleoplasm|DNA-directed RNA polymerase II, core complex|	mRNA splicing, via spliceosome|transcription, RNA-templated|DNA repair|transcription-coupled nucleotide-excision repair|nucleotide-excision repair|regulation of transcription, DNA-templated|transcription from RNA polymerase II promoter|transcription from RNA polymerase II promoter|transcription from RNA polymerase II promoter|transcription initiation from RNA polymerase II promoter|transcription …	RNA polymerase II activity|DNA binding|DNA-directed RNA polymerase activity|RNA-directed RNA polymerase activity|protein binding|protein binding|ubiquitin protein ligase binding|poly(A) RNA binding|metal ion binding|	5	-2.2	14.1	4	-3.1	26.8	-3	-5	-2	39.1	0.000382	0
8859	STK19	serine/threonine kinase 19	nucleus|	protein phosphorylation|	protein serine/threonine kinase activity|ATP binding|	5	-4.2	30.1	5	-3.4	9.75	-4.1	-7.2	-3	38.8	0.000391	0
10240	MRPS31	mitochondrial ribosomal protein S31	nucleolus|mitochondrion|mitochondrial small ribosomal subunit|	None	structural constituent of ribosome|protein binding|protein domain specific binding|poly(A) RNA binding|	5	-4.3	35.7	5	-1.7	6.9	-4.2	-7	-2.1	38.7	0.000393	0
51222	ZNF219	zinc finger protein 219	nucleus|integral component of membrane|	regulation of neurotransmitter levels|transcription, DNA-templated|regulation of transcription, DNA-templated|G-protein coupled receptor signaling pathway|negative regulation of transcription, DNA-templated|	DNA binding|sequence-specific DNA binding transcription factor activity|histamine receptor activity|protein binding|metal ion binding|	5	-3.9	15.2	5	-5.2	24.6	-5.1	-9.6	-4.1	38.6	0.000397	0
4849	CNOT3	CCR4-NOT transcription complex, subunit 3	cytoplasmic mRNA processing body|nucleus|cytosol|CCR4-NOT complex|	nuclear-transcribed mRNA catabolic process, deadenylation-dependent decay|nuclear-transcribed mRNA poly(A) tail shortening|trophectodermal cell differentiation|transcription, DNA-templated|regulation of transcription, DNA-templated|regulation of translation|gene expression|RNA metabolic process|mRNA metabolic process|gene silencing by RNA|regulation of stem cell maintenance|	protein binding|	5	-1.6	8.46	5	-2.4	31.6	-2.3	-3.9	-1.7	38.5	0.000398	0
91582	RPS19BP1	ribosomal protein S19 binding protein 1	nucleoplasm|nucleolus|nucleolus|cytoplasm|	None	protein binding|enzyme binding|poly(A) RNA binding|	5	-4.1	26.9	5	-3.3	12.6	-4	-7.2	-2.8	38.5	0.000398	0
5424	POLD1	polymerase (DNA directed), delta 1, catalytic subunit	nucleotide-excision repair complex|nucleus|nucleoplasm|cytoplasm|membrane|aggresome|delta DNA polymerase complex|	mitotic cell cycle|telomere maintenance via recombination|telomere maintenance|DNA synthesis involved in DNA repair|DNA synthesis involved in DNA repair|DNA replication|DNA strand elongation involved in DNA replication|DNA repair|transcription-coupled nucleotide-excision repair|base-excision repair|base-excision repair, gap-filling|nucleotide-excision repair|nucleotide-excision repair, DNA gap fi…	nucleotide binding|DNA binding|chromatin binding|DNA-directed DNA polymerase activity|protein binding|3'-5' exonuclease activity|metal ion binding|4 iron, 4 sulfur cluster binding|	5	-4.6	31.8	5	-2	10.9	-4.5	-7.7	-2.6	38.4	0.000402	0
79080	CCDC86	coiled-coil domain containing 86	nucleus|nucleolus|	viral process|	protein binding|poly(A) RNA binding|	5	-4.8	29.6	5	-3.6	10.3	-4.7	-8.1	-3.3	38.3	0.000403	0
22916	NCBP2	nuclear cap binding protein subunit 2, 20kDa	nucleus|nucleus|nucleoplasm|nucleoplasm|cytoplasm|cytosol|mRNA cap binding complex|nuclear cap binding complex|	nuclear-transcribed mRNA catabolic process, nonsense-mediated decay|nuclear-transcribed mRNA catabolic process, nonsense-mediated decay|nuclear-transcribed mRNA catabolic process, nonsense-mediated decay|spliceosomal snRNP assembly|mRNA splicing, via spliceosome|transcription from RNA polymerase II promoter|transcription elongation from RNA polymerase II promoter|termination of RNA polymerase II …	nucleotide binding|RNA cap binding|RNA 7-methylguanosine cap binding|protein binding|poly(A) RNA binding|	5	-1.5	9.23	5	-4.7	34	-4.6	-7.7	-1.9	38	0.000415	0
56252	YLPM1	YLP motif containing 1	nucleus|nuclear speck|	negative regulation of transcription from RNA polymerase II promoter|transcription, DNA-templated|biological_process|regulation of telomere maintenance|	RNA polymerase II core promoter proximal region sequence-specific DNA binding transcription factor activity involved in negative regulation of transcription|protein binding|poly(A) RNA binding|	5	-2.8	11.5	5	-2.9	26.9	-2.9	-4.7	-2	37.9	0.000424	0
10540	DCTN2	dynactin 2 (p50)	kinetochore|cytoplasm|centrosome|cytosol|dynactin complex|microtubule|membrane|dynein complex|growth cone|vesicle|extracellular vesicular exosome|	G2/M transition of mitotic cell cycle|mitotic cell cycle|mitotic spindle organization|mitotic nuclear division|metabolic process|cell proliferation|antigen processing and presentation of exogenous peptide antigen via MHC class II|	motor activity|protein binding|spectrin binding|	5	-5.9	34.5	5	-1.2	11.1	-5.8	-8.8	-2.2	37.7	0.000431	0
6301	SARS	seryl-tRNA synthetase	cytoplasm|mitochondrion|cytosol|extracellular vesicular exosome|	translation|tRNA aminoacylation for protein translation|seryl-tRNA aminoacylation|tRNA processing|gene expression|selenocysteinyl-tRNA(Sec) biosynthetic process|	RNA binding|serine-tRNA ligase activity|ATP binding|	5	-5.1	34.4	5	-2.8	5.21	-5	-9	-2.8	37.7	0.000431	0
9670	IPO13	importin 13	nucleus|cytoplasm|	protein import into nucleus|	protein binding|Ran GTPase binding|	5	2.4	22.5	5	1.8	16.4	2.3	1.6	3.7	37.5	0.000437	0
863	CBFA2T3	core-binding factor, runt domain, alpha subunit 2; translocated to, 3	Golgi membrane|nucleoplasm|nucleolus|	transcription, DNA-templated|cell proliferation|granulocyte differentiation|positive regulation of transcription from RNA polymerase II promoter|	chromatin binding|sequence-specific DNA binding transcription factor activity|protein binding|metal ion binding|	10	-5.3	20.8	10	-3.2	20.8	-5.1	-8.5	-2.6	37.4	0.000441	0
63967	CLSPN	claspin	nucleoplasm|	DNA damage checkpoint|DNA replication|DNA repair|apoptotic process|cellular component disassembly involved in execution phase of apoptosis|peptidyl-serine phosphorylation|G2 DNA damage checkpoint|activation of protein kinase activity|mitotic DNA replication checkpoint|	DNA binding|protein binding|anaphase-promoting complex binding|	5	-2.8	9.21	4	-3.3	29	-3.2	-5.8	-2.5	37.2	0.000452	0
996	CDC27	cell division cycle 27	nucleus|nucleoplasm|anaphase-promoting complex|cytoplasm|centrosome|spindle|cytosol|spindle microtubule|	mitotic cell cycle|metaphase/anaphase transition of mitotic cell cycle|mitotic spindle assembly checkpoint|cell proliferation|anaphase-promoting complex-dependent proteasomal ubiquitin-dependent protein catabolic process|negative regulation of ubiquitin-protein ligase activity involved in mitotic cell cycle|positive regulation of ubiquitin-protein ligase activity involved in mitotic cell cycle|re…	protein binding|protein phosphatase binding|	5	-3	12.5	5	-3.3	25.3	-3.2	-5.1	-2.3	37.1	0.000458	0
6749	SSRP1	structure specific recognition protein 1	nucleus|nucleoplasm|chromosome|nucleolus|cytoplasm|	DNA replication|DNA repair|regulation of transcription, DNA-templated|transcription from RNA polymerase II promoter|transcription elongation from RNA polymerase II promoter|gene expression|viral process|positive regulation of viral transcription|	DNA binding|chromatin binding|protein binding|poly(A) RNA binding|	5	-3.5	7.49	5	-3.1	30.4	-3.3	-5.7	-2.3	37.1	0.000458	0
51747	LUC7L3	LUC7-like 3 (S. cerevisiae)	nucleus|U1 snRNP|plasma membrane|focal adhesion|nuclear speck|	mRNA splice site selection|RNA splicing|	DNA binding|mRNA binding|protein binding|poly(A) RNA binding|	5	4.3	20.2	5	2	21.5	3.9	1.9	5.9	37	0.000462	0
25926	NOL11	nucleolar protein 11	nucleolus|t-UTP complex|	transcription, DNA-templated|maturation of SSU-rRNA|positive regulation of transcription of nuclear large rRNA transcript from RNA polymerase I promoter|	protein binding|poly(A) RNA binding|	5	-4.4	23.5	5	-4	14.2	-4.3	-7.7	-3.6	37	0.000462	0
29997	GLTSCR2	glioma tumor suppressor candidate region gene 2	intracellular|nucleolus|intracellular membrane-bounded organelle|	biological_process|	poly(A) RNA binding|	5	-6.3	22.5	5	-3.1	17.9	-6.2	-11.9	-4.9	36.8	0.000473	0
283464	GXYLT1	glucoside xylosyltransferase 1	Golgi membrane|integral component of membrane|	carbohydrate metabolic process|O-glycan processing|glycosaminoglycan metabolic process|chondroitin sulfate metabolic process|small molecule metabolic process|	UDP-xylosyltransferase activity|	5	-4.6	23.5	5	-3.1	14.7	-4.5	-8.5	-3.2	36.6	0.000482	0
6209	RPS15	ribosomal protein S15	nucleus|nucleoplasm|cytosol|membrane|cytosolic small ribosomal subunit|	ribosomal small subunit export from nucleus|nuclear-transcribed mRNA catabolic process, nonsense-mediated decay|osteoblast differentiation|rRNA processing|translation|translation|translational initiation|translational elongation|translational termination|SRP-dependent cotranslational protein targeting to membrane|gene expression|viral process|RNA metabolic process|mRNA metabolic process|viral lif…	DNA binding|structural constituent of ribosome|protein binding|poly(A) RNA binding|	5	-4.2	22.7	5	-4.1	14	-4.1	-7.8	-3.6	36.4	0.000492	0
10621	POLR3F	polymerase (RNA) III (DNA directed) polypeptide F, 39 kDa	nucleoplasm|DNA-directed RNA polymerase III complex|DNA-directed RNA polymerase III complex|cytosol|	regulation of transcription from RNA polymerase III promoter|transcription from RNA polymerase III promoter|transcription elongation from RNA polymerase III promoter|termination of RNA polymerase III transcription|gene expression|positive regulation of type I interferon production|positive regulation of interferon-beta production|innate immune response|positive regulation of innate immune respons…	RNA polymerase III activity|DNA binding|DNA-directed RNA polymerase activity|protein binding|	5	-3.9	27.8	5	-2.2	11.3	-3.8	-6.2	-1.9	36.2	0.0005	0
6141	RPL18	ribosomal protein L18	nucleus|nucleolus|cytoplasm|cytosol|membrane|cytosolic large ribosomal subunit|	nuclear-transcribed mRNA catabolic process, nonsense-mediated decay|translation|translation|translational initiation|translational elongation|translational termination|SRP-dependent cotranslational protein targeting to membrane|gene expression|viral process|RNA metabolic process|mRNA metabolic process|viral life cycle|viral transcription|cellular protein metabolic process|	RNA binding|structural constituent of ribosome|	4	-1.8	9.66	5	-4.2	30.2	-4.1	-7.1	-1.7	36.2	0.0005	0
55596	ZCCHC8	zinc finger, CCHC domain containing 8	nucleus|nucleoplasm|catalytic step 2 spliceosome|	mRNA splicing, via spliceosome|	protein binding|zinc ion binding|poly(A) RNA binding|	5	2	19.9	5	2.1	16.5	2.1	1.4	3.3	36	0.000511	0
3837	KPNB1	karyopherin (importin) beta 1	nucleus|nuclear envelope|nuclear pore|nucleoplasm|cytoplasm|cytosol|membrane|nuclear membrane|extracellular vesicular exosome|endoplasmic reticulum tubular network|	protein import into nucleus, translocation|apoptotic DNA fragmentation|protein import into nucleus|NLS-bearing protein import into nucleus|ribosomal protein import into nucleus|apoptotic process|cellular component disassembly involved in execution phase of apoptosis|viral process|viral life cycle|cytokine-mediated signaling pathway|small molecule metabolic process|intracellular transport of virus|	protein binding|nuclear localization sequence binding|zinc ion binding|Ran GTPase binding|protein transporter activity|enzyme binding|protein domain specific binding|poly(A) RNA binding|	5	-2.6	10.9	5	-1.8	26.6	-1.9	-3.6	-1.4	35.9	0.000515	0
128061	C1ORF131	chromosome 1 open reading frame 131	None	None	poly(A) RNA binding|	5	-3.5	15.3	5	-3.5	20.9	-3.5	-5.7	-2.6	35.8	0.000521	0
6228	RPS23	ribosomal protein S23	nucleolus|cytoplasm|cytosol|ribosome|membrane|cytosolic small ribosomal subunit|	nuclear-transcribed mRNA catabolic process, nonsense-mediated decay|translation|translation|translational initiation|translational elongation|translational termination|SRP-dependent cotranslational protein targeting to membrane|gene expression|viral process|RNA metabolic process|mRNA metabolic process|viral life cycle|viral transcription|cellular protein metabolic process|	structural constituent of ribosome|protein binding|poly(A) RNA binding|	5	-3.7	27.7	5	-1.4	13.1	-3.6	-5.7	-2.5	35.8	0.000521	0
9820	CUL7	cullin 7	nucleus|anaphase-promoting complex|cytoplasm|Golgi apparatus|centrosome|cytosol|Cul7-RING ubiquitin ligase complex|perinuclear region of cytoplasm|3M complex|	microtubule cytoskeleton organization|mitotic cytokinesis|vasculogenesis|epithelial to mesenchymal transition|placenta development|proteolysis|ubiquitin-dependent protein catabolic process|activation of signaling protein activity involved in unfolded protein response|Golgi organization|regulation of mitosis|viral process|protein ubiquitination|protein ubiquitination|protein ubiquitination|endopla…	protein binding|ubiquitin protein ligase binding|	5	-4.2	23.7	5	-3.2	13.1	-4.2	-7.7	-3.1	35.7	0.000526	0
6629	SNRPB2	small nuclear ribonucleoprotein polypeptide B	nucleus|nucleoplasm|spliceosomal complex|U2 snRNP|nucleolus|catalytic step 2 spliceosome|	mRNA splicing, via spliceosome|mRNA splicing, via spliceosome|mRNA processing|RNA splicing|gene expression|	nucleotide binding|protein binding|snRNA binding|	5	-1.1	5.18	5	-3.9	35.1	-3.8	-6.1	-1.2	35.7	0.000526	0
25764	HYPK	huntingtin interacting protein K	nucleus|cytoplasm|	None	None	5	3.3	17	5	2.5	19.5	2.8	2	4.8	35.3	0.000553	0
29107	NXT1	nuclear transport factor 2-like export factor 1	nuclear pore|cytoplasm|nuclear speck|	RNA export from nucleus|protein export from nucleus|	protein binding|Ran GTPase binding|	5	-3.7	14	5	-3.6	21.6	-3.6	-6.2	-2.9	35.2	0.000561	0
6241	RRM2	ribonucleotide reductase M2	nucleus|nucleoplasm|cytoplasm|cytosol|	G1/S transition of mitotic cell cycle|regulation of transcription involved in G1/S transition of mitotic cell cycle|mitotic cell cycle|DNA replication|deoxyribonucleoside diphosphate metabolic process|deoxyribonucleotide biosynthetic process|nucleobase-containing small molecule interconversion|small molecule metabolic process|protein heterotetramerization|nucleobase-containing small molecule meta…	ribonucleoside-diphosphate reductase activity, thioredoxin disulfide as acceptor|ribonucleoside-diphosphate reductase activity, thioredoxin disulfide as acceptor|protein binding|metal ion binding|	5	-3.5	15.2	5	-3.8	20.6	-3.7	-6.1	-2.6	35.2	0.000561	0
55703	POLR3B	polymerase (RNA) III (DNA directed) polypeptide B	nucleoplasm|DNA-directed RNA polymerase III complex|cytosol|	transcription from RNA polymerase III promoter|transcription elongation from RNA polymerase III promoter|termination of RNA polymerase III transcription|gene expression|positive regulation of type I interferon production|positive regulation of interferon-beta production|innate immune response|positive regulation of innate immune response|defense response to virus|	DNA binding|DNA-directed RNA polymerase activity|ribonucleoside binding|metal ion binding|	5	-2	14.9	5	-1.7	20.9	-1.9	-3.2	-1.4	34.9	0.000576	0
57405	SPC25	SPC25, NDC80 kinetochore complex component	condensed chromosome kinetochore|nucleus|cytosol|Ndc80 complex|	mitotic cell cycle|mitotic spindle organization|chromosome segregation|mitotic nuclear division|	protein binding|	5	-3	10.7	5	-3.9	25.6	-3.7	-6.5	-2.7	34.9	0.000576	0
10480	EIF3M	eukaryotic translation initiation factor 3, subunit M	eukaryotic translation initiation factor 3 complex|eukaryotic 43S preinitiation complex|eukaryotic 48S preinitiation complex|	formation of translation preinitiation complex|cytoplasmic translational initiation|translational initiation|regulation of translational initiation|	translation initiation factor activity|protein binding|	5	-3.1	8.73	5	-4.7	28	-4.5	-8.4	-3.2	34.8	0.000582	0
55272	IMP3	IMP3, U3 small nucleolar ribonucleoprotein	nucleus|nucleolus|ribonucleoprotein complex|	rRNA processing|	protein binding|rRNA binding|poly(A) RNA binding|	5	-2.5	14.8	5	-3.2	21.3	-3	-5.1	-2.2	34.8	0.000582	0
5422	POLA1	polymerase (DNA directed), alpha 1, catalytic subunit	chromatin|nucleus|nuclear envelope|nucleoplasm|nucleoplasm|alpha DNA polymerase:primase complex|alpha DNA polymerase:primase complex|nucleolus|cytoplasm|nuclear matrix|	G1/S transition of mitotic cell cycle|regulation of transcription involved in G1/S transition of mitotic cell cycle|mitotic S phase|mitotic cell cycle|telomere maintenance via recombination|telomere maintenance|DNA replication|DNA replication, synthesis of RNA primer|DNA replication initiation|DNA replication initiation|DNA strand elongation involved in DNA replication|DNA strand elongation invol…	nucleotide binding|nucleoside binding|DNA binding|DNA binding|chromatin binding|DNA-directed DNA polymerase activity|DNA-directed DNA polymerase activity|DNA primase activity|protein binding|3'-5' exonuclease activity|metal ion binding|protein heterodimerization activity|4 iron, 4 sulfur cluster binding|	5	-3.2	15.3	5	-2.4	21	-2.6	-4.7	-2	34.8	0.000582	0
9894	TELO2	telomere maintenance 2	chromosome, telomeric region|intracellular|nucleus|cytoplasm|membrane|TORC1 complex|TORC2 complex|	regulation of TOR signaling|	protein binding|protein complex binding|protein complex scaffold|	5	3.9	18.9	5	2.1	19	3.5	1.8	5.4	34.6	0.000596	0
23279	NUP160	nucleoporin 160kDa	kinetochore|nuclear envelope|nuclear pore|cytosol|nuclear pore outer ring|nuclear pore outer ring|	mitotic cell cycle|carbohydrate metabolic process|mRNA export from nucleus|mitotic nuclear envelope disassembly|hexose transport|regulation of glucose transport|protein transport|glucose transport|viral process|cytokine-mediated signaling pathway|small molecule metabolic process|transmembrane transport|	nucleocytoplasmic transporter activity|protein binding|	5	-1.2	1.48	5	-4.4	35.9	-4.4	-8.6	-3	34.5	0.000604	0
10969	EBNA1BP2	EBNA1 binding protein 2	nucleus|nucleolus|membrane|	ribosome biogenesis|	poly(A) RNA binding|	5	-2.2	14.3	5	-3.2	21.6	-3.1	-5.1	-2.2	34.1	0.000635	0
554251	FBXO48	F-box protein 48	None	None	None	5	-4	19.5	5	-4.1	14.9	-4.1	-7.7	-3.5	34	0.00064	0
2194	FASN	fatty acid synthase	cytoplasm|mitochondrion|Golgi apparatus|cytosol|plasma membrane|membrane|melanosome|glycogen granule|extracellular vesicular exosome|	osteoblast differentiation|acetyl-CoA metabolic process|energy reserve metabolic process|fatty acid metabolic process|fatty acid biosynthetic process|vitamin metabolic process|water-soluble vitamin metabolic process|pantothenate metabolic process|triglyceride biosynthetic process|positive regulation of cellular metabolic process|long-chain fatty-acyl-CoA biosynthetic process|cellular lipid metabo…	fatty acid synthase activity|[acyl-carrier-protein] S-acetyltransferase activity|[acyl-carrier-protein] S-malonyltransferase activity|3-oxoacyl-[acyl-carrier-protein] synthase activity|3-oxoacyl-[acyl-carrier-protein] reductase (NADPH) activity|3-hydroxypalmitoyl-[acyl-carrier-protein] dehydratase activity|enoyl-[acyl-carrier-protein] reductase (NADPH, B-specific) activity|oleoyl-[acyl-carrier-pr…	5	3.2	26.1	5	1.2	12.6	2.8	1.5	4.4	33.9	0.00065	0
56254	RNF20	ring finger protein 20, E3 ubiquitin protein ligase	ubiquitin ligase complex|nucleus|nucleolus|HULC complex|	protein polyubiquitination|regulation of transcription, DNA-templated|ubiquitin-dependent protein catabolic process|histone monoubiquitination|negative regulation of cell migration|positive regulation of histone methylation|histone H2B ubiquitination|positive regulation of transcription, DNA-templated|	p53 binding|chromatin binding|transcription coactivator activity|ubiquitin-protein transferase activity|ubiquitin-protein transferase activity|protein binding|zinc ion binding|ligase activity|ubiquitin protein ligase binding|histone binding|	5	-1.5	4.67	5	-4.7	33.3	-4.7	-9	-2.8	33.9	0.00065	0
9125	RQCD1	RCD1 required for cell differentiation1 homolog (S. pombe)	cytoplasmic mRNA processing body|nucleus|cytosol|membrane|CCR4-NOT complex|	nuclear-transcribed mRNA catabolic process, deadenylation-dependent decay|nuclear-transcribed mRNA poly(A) tail shortening|transcription, DNA-templated|regulation of transcription, DNA-templated|regulation of translation|sex differentiation|gene expression|RNA metabolic process|mRNA metabolic process|cytokine-mediated signaling pathway|gene silencing by RNA|negative regulation of intracellular es…	protein binding|	5	2.3	17.7	5	2.1	16.8	2.2	1.7	3.8	33.8	0.000657	0
55929	DMAP1	DNA methyltransferase 1 associated protein 1	nucleus|nucleus|nucleoplasm|replication fork|cytoplasm|NuA4 histone acetyltransferase complex|	negative regulation of transcription from RNA polymerase II promoter|DNA repair|DNA methylation|chromatin organization|chromatin remodeling|transcription, DNA-templated|regulation of growth|positive regulation of transcription factor import into nucleus|histone H4 acetylation|histone H2A acetylation|negative regulation of transcription, DNA-templated|	RNA polymerase II repressing transcription factor binding|chromatin binding|transcription corepressor activity|protein binding|	5	2.4	24.6	5	1.1	12.2	2.2	1.3	3.5	33.7	0.000666	0
5438	POLR2I	polymerase (RNA) II (DNA directed) polypeptide I, 14.5kDa	nucleus|nucleoplasm|DNA-directed RNA polymerase II, core complex|	mRNA splicing, via spliceosome|maintenance of transcriptional fidelity during DNA-templated transcription elongation from RNA polymerase II promoter|DNA repair|transcription-coupled nucleotide-excision repair|transcription-coupled nucleotide-excision repair|nucleotide-excision repair|transcription from RNA polymerase II promoter|transcription from RNA polymerase II promoter|transcription initiati…	DNA binding|DNA-directed RNA polymerase activity|zinc ion binding|	5	-2.6	4.32	5	-3.2	30.3	-3.2	-5.6	-2.6	33.7	0.000666	0
8428	STK24	serine/threonine kinase 24	nucleus|nucleoplasm|nucleolus|cytoplasm|cytosol|membrane|extracellular vesicular exosome|	protein phosphorylation|apoptotic process|cellular component disassembly involved in execution phase of apoptosis|signal transduction|intrinsic apoptotic signaling pathway in response to oxidative stress|signal transduction by phosphorylation|negative regulation of cell migration|protein autophosphorylation|regulation of axon regeneration|execution phase of apoptosis|	protein kinase activity|protein serine/threonine kinase activity|protein binding|ATP binding|metal ion binding|	5	-3.9	11.8	5	-4.2	22.4	-4.2	-7.8	-3.6	33.7	0.000666	0
84502	JPH4	junctophilin 4	smooth endoplasmic reticulum|plasma membrane|junctional sarcoplasmic reticulum membrane|integral component of membrane|dendritic shaft|	learning|regulation of synaptic plasticity|neuromuscular process controlling balance|regulation of ryanodine-sensitive calcium-release channel activity|calcium ion transport into cytosol|	None	5	-3.8	11.6	5	-5	22.9	-4.9	-9.7	-4.1	33.4	0.00069	0
5859	QARS	glutaminyl-tRNA synthetase	cytoplasm|mitochondrial matrix|cytosol|	tRNA aminoacylation for protein translation|glutaminyl-tRNA aminoacylation|gene expression|	glutamine-tRNA ligase activity|ATP binding|	5	-3	4.4	5	-4.5	30.5	-4.4	-8.3	-3	33.4	0.00069	0
286753	TUSC5	tumor suppressor candidate 5	integral component of membrane|	response to biotic stimulus|	None	5	-5.1	28.2	5	-1.9	9.48	-5	-8.9	-2	33.4	0.00069	0
5226	PGD	phosphogluconate dehydrogenase	nucleus|cytosol|extracellular vesicular exosome|	carbohydrate metabolic process|pentose-phosphate shunt|pentose-phosphate shunt|pentose-phosphate shunt, oxidative branch|pentose biosynthetic process|D-gluconate metabolic process|small molecule metabolic process|oxidation-reduction process|	phosphogluconate dehydrogenase (decarboxylating) activity|phosphogluconate dehydrogenase (decarboxylating) activity|NADP binding|	5	-3.4	23.9	5	-1.1	15.2	-2.7	-4.8	-1.5	33.3	0.000701	0
22907	DHX30	DEAH (Asp-Glu-Ala-His) box helicase 30	cytoplasm|mitochondrion|mitochondrial nucleoid|	ATP catabolic process|	chromatin binding|double-stranded RNA binding|protein binding|ATP binding|ATP-dependent helicase activity|poly(A) RNA binding|	10	-1.1	6.75	10	-4.4	32.2	-1.7	-8	-1.4	33	0.000733	0
9904	RBM19	RNA binding motif protein 19	nucleus|nucleoplasm|chromosome|nucleolus|nucleolus|cytoplasm|cytoplasm|membrane|	multicellular organismal development|positive regulation of embryonic development|	nucleotide binding|poly(A) RNA binding|	5	-3.4	22	5	-2.2	13	-3.3	-5.3	-2.6	32.8	0.000753	0
57819	LSM2	LSM2 homolog, U6 small nuclear RNA associated (S. cerevisiae)	nucleoplasm|cytosol|catalytic step 2 spliceosome|	nuclear-transcribed mRNA catabolic process, deadenylation-dependent decay|mRNA splicing, via spliceosome|mRNA splicing, via spliceosome|RNA splicing|gene expression|RNA metabolic process|mRNA metabolic process|exonucleolytic nuclear-transcribed mRNA catabolic process involved in deadenylation-dependent decay|	protein binding|U6 snRNA binding|protein kinase binding|poly(A) RNA binding|	5	3.7	14.3	5	2.8	19.8	3.4	2.2	5.8	32.7	0.000761	0
94104	PAXBP1	PAX3 and PAX7 binding protein 1	nucleus|cytosol|	transcription, DNA-templated|muscle organ development|regulation of satellite cell proliferation|positive regulation of histone methylation|positive regulation of transcription from RNA polymerase II promoter|positive regulation of myoblast proliferation|	DNA binding|sequence-specific DNA binding transcription factor activity|transcription factor binding|	5	5.8	24.6	5	2.4	13.1	5.7	2.3	9.9	32.7	0.000761	0
6837	MED22	mediator complex subunit 22	cytoplasm|mediator complex|	regulation of transcription from RNA polymerase II promoter|transcription from RNA polymerase II promoter|	RNA polymerase II transcription cofactor activity|protein binding|	5	-1.5	3.74	5	-4.2	32.1	-4.1	-7.8	-3	32.6	0.000775	0
93233	CCDC114	coiled-coil domain containing 114	cilium|outer dynein arm|	outer dynein arm assembly|	None	10	-4.4	21.1	10	-4.1	11.9	-4.3	-8.5	-3.6	32.4	0.0008	0
1479	CSTF3	cleavage stimulation factor, 3' pre-RNA, subunit 3, 77kDa	nucleus|nucleoplasm|	mRNA splicing, via spliceosome|transcription from RNA polymerase II promoter|termination of RNA polymerase II transcription|mRNA polyadenylation|mRNA cleavage|RNA splicing|gene expression|mRNA 3'-end processing|	RNA binding|poly(A) RNA binding|	5	-3.8	27.1	5	-1.3	10.2	-3.6	-5.3	-1.1	32.4	0.0008	0
10556	RPP30	ribonuclease P/MRP 30kDa subunit	nucleus|nucleolar ribonuclease P complex|	tRNA processing|RNA phosphodiester bond hydrolysis|RNA phosphodiester bond hydrolysis, endonucleolytic|RNA phosphodiester bond hydrolysis, endonucleolytic|	ribonuclease P activity|poly(A) RNA binding|	5	-3.3	16.4	5	-2.8	17	-3.1	-5.1	-2.4	32.4	0.0008	0
7756	ZNF207	zinc finger protein 207	kinetochore|kinetochore|condensed chromosome kinetochore|nucleus|nucleus|microtubule|	mitotic sister chromatid segregation|regulation of transcription, DNA-templated|mitotic spindle assembly checkpoint|attachment of spindle microtubules to kinetochore|protein stabilization|regulation of chromosome segregation|	DNA binding|sequence-specific DNA binding transcription factor activity|protein binding|microtubule binding|heparin binding|zinc ion binding|poly(A) RNA binding|	10	4	13.9	10	2.9	20.2	3.8	2.6	6.1	32.4	0.0008	0
11128	POLR3A	polymerase (RNA) III (DNA directed) polypeptide A, 155kDa	nucleoplasm|DNA-directed RNA polymerase III complex|cytosol|membrane|	transcription, DNA-templated|transcription from RNA polymerase III promoter|transcription elongation from RNA polymerase III promoter|termination of RNA polymerase III transcription|gene expression|positive regulation of type I interferon production|positive regulation of interferon-beta production|innate immune response|innate immune response|defense response to virus|	RNA polymerase III activity|DNA binding|chromatin binding|DNA-directed RNA polymerase activity|zinc ion binding|ribonucleoside binding|	5	-3.8	23.7	5	-1.7	12.7	-3.6	-5.4	-1.3	32.3	0.00081	0
79872	CBLL1	Cbl proto-oncogene-like 1, E3 ubiquitin protein ligase	ubiquitin ligase complex|	negative regulation of cell adhesion|single organismal cell-cell adhesion|protein ubiquitination|protein ubiquitination|positive regulation of cell migration|positive regulation of endocytosis|	ubiquitin-protein transferase activity|ubiquitin-protein transferase activity|protein binding|zinc ion binding|ligase activity|identical protein binding|	5	1.7	14.7	5	1.5	18.1	1.6	1.1	2.6	32.2	0.00082	0
64318	NOC3L	nucleolar complex associated 3 homolog (S. cerevisiae)	nucleolus|nuclear speck|	fat cell differentiation|	poly(A) RNA binding|	5	-2.7	12.6	5	-2.6	20.1	-2.7	-4.3	-2	32.2	0.00082	0
27339	PRPF19	pre-mRNA processing factor 19	ubiquitin ligase complex|Prp19 complex|nucleus|cytoplasm|lipid particle|spindle|membrane|nuclear speck|catalytic step 2 spliceosome|	protein polyubiquitination|spliceosomal complex assembly|mRNA splicing, via spliceosome|mRNA splicing, via spliceosome|inner cell mass cell proliferation|DNA repair|lipid biosynthetic process|negative regulation of neuron differentiation|positive regulation of mRNA splicing, via spliceosome|positive regulation of astrocyte differentiation|	DNA binding|ubiquitin-protein transferase activity|protein binding|ubiquitin-ubiquitin ligase activity|identical protein binding|	5	1.7	14.9	5	1.6	17.7	1.7	1.3	2.7	32.1	0.000836	0
5985	RFC5	replication factor C (activator 1) 5, 36.5kDa	nucleoplasm|DNA replication factor C complex|	mitotic cell cycle|telomere maintenance via recombination|telomere maintenance|DNA replication|DNA replication|DNA strand elongation involved in DNA replication|DNA repair|DNA repair|transcription-coupled nucleotide-excision repair|nucleotide-excision repair|nucleotide-excision repair, DNA gap filling|telomere maintenance via semi-conservative replication|	DNA binding|protein binding|ATP binding|nucleoside-triphosphatase activity|enzyme binding|	5	-2.2	14.3	5	-2.9	19.2	-2.8	-4.5	-1.7	32.1	0.000836	0
56904	SH3GLB2	SH3-domain GRB2-like endophilin B2	cytoplasm|	None	protein binding|	5	-5.4	27.3	5	-2.2	8.8	-5.4	-9.2	-1.9	32	0.000846	0
55622	TTC27	tetratricopeptide repeat domain 27	cellular_component|	biological_process|	molecular_function|	5	2	18.2	5	1.4	15.1	1.8	1.2	3	32	0.000846	0
3697	ITIH1	inter-alpha-trypsin inhibitor heavy chain 1	extracellular region|extracellular vesicular exosome|blood microparticle|	negative regulation of endopeptidase activity|hyaluronan metabolic process|	serine-type endopeptidase inhibitor activity|calcium ion binding|	5	-5.1	23.5	5	-3	10.1	-5.1	-9.8	-3.9	31.7	0.000892	0
130951	M1AP	meiosis 1 associated protein	cytoplasm|integral component of membrane|	RNA processing|spermatogenesis|female gamete generation|cell differentiation|chromatin assembly|male meiosis chromosome separation|	molecular_function|	5	-5.7	28.1	5	-3.7	5.03	-5.7	-10.5	-4.3	31.6	0.000907	0
23248	RPRD2	regulation of nuclear pre-mRNA domain containing 2	DNA-directed RNA polymerase II, holoenzyme|	None	None	5	-3.1	18.2	5	-2.1	15.1	-2.4	-4.4	-1.6	31.5	0.000922	0
4175	MCM6	minichromosome maintenance complex component 6	nucleus|nucleus|nucleoplasm|MCM complex|	G1/S transition of mitotic cell cycle|mitotic cell cycle|DNA replication|DNA replication|DNA unwinding involved in DNA replication|DNA replication initiation|DNA strand elongation involved in DNA replication|	single-stranded DNA binding|ATP-dependent DNA helicase activity|protein binding|ATP binding|identical protein binding|	5	-2.9	6.06	5	-4.2	27	-4.1	-7.6	-2.9	31.4	0.000934	0
9439	MED23	mediator complex subunit 23	nucleoplasm|transcription factor complex|mediator complex|	regulation of transcription, DNA-templated|regulation of transcription from RNA polymerase II promoter|transcription initiation from RNA polymerase II promoter|gene expression|	transcription coactivator activity|protein binding|	5	-2.4	21.2	5	-2.6	10.8	-2.5	-4.2	-1.7	31.4	0.000934	0
10915	TCERG1	transcription elongation regulator 1	nucleus|	negative regulation of transcription from RNA polymerase II promoter|transcription from RNA polymerase II promoter|	RNA polymerase II repressing transcription factor binding|RNA polymerase II transcription corepressor activity|transcription coactivator activity|protein binding|poly(A) RNA binding|proline-rich region binding|	5	2.6	11.5	5	2.6	20.2	2.6	1.8	4.2	31.3	0.000947	0
84240	ZCCHC9	zinc finger, CCHC domain containing 9	None	negative regulation of phosphatase activity|	zinc ion binding|poly(A) RNA binding|	5	-3.5	17.1	5	-2.5	15.8	-3.3	-5.4	-2.1	31.3	0.000947	0
10772	SRSF10	serine/arginine-rich splicing factor 10	nucleus|nucleoplasm|cytoplasm|nuclear speck|	spliceosomal tri-snRNP complex assembly|RNA splicing, via transesterification reactions|mRNA splicing, via spliceosome|regulation of transcription, DNA-templated|mRNA splice site selection|mRNA export from nucleus|cytoplasmic transport|negative regulation of mRNA splicing, via spliceosome|	nucleotide binding|RNA binding|protein binding|poly(A) RNA binding|RS domain binding|unfolded protein binding|	5	2.6	17.3	5	1.9	14.9	2.2	1.4	3.7	31.1	0.00098	0
117246	FTSJ3	FtsJ homolog 3 (E. coli)	nucleus|nucleolus|preribosome, small subunit precursor|	enzyme-directed rRNA 2'-O-methylation|	protein binding|rRNA methyltransferase activity|poly(A) RNA binding|	5	-3.3	12.3	5	-2.5	20.2	-3	-4.9	-2	31	0.000999	0
29945	ANAPC4	anaphase promoting complex subunit 4	nucleus|nucleoplasm|anaphase-promoting complex|cytosol|	G2/M transition of mitotic cell cycle|mitotic anaphase|mitotic cell cycle|ubiquitin-dependent protein catabolic process|mitotic nuclear division|mitotic spindle assembly checkpoint|anaphase-promoting complex-dependent proteasomal ubiquitin-dependent protein catabolic process|negative regulation of ubiquitin-protein ligase activity involved in mitotic cell cycle|positive regulation of ubiquitin-pr…	ubiquitin-protein transferase activity|protein binding|protein phosphatase binding|	5	-3	16	5	-3.3	15.6	-3.2	-5.3	-2.1	30.9	0.00101	0
5433	POLR2D	polymerase (RNA) II (DNA directed) polypeptide D	cytoplasmic mRNA processing body|nucleus|nucleoplasm|DNA-directed RNA polymerase II, core complex|	nuclear-transcribed mRNA catabolic process, deadenylation-dependent decay|mRNA splicing, via spliceosome|DNA repair|transcription-coupled nucleotide-excision repair|nucleotide-excision repair|transcription from RNA polymerase II promoter|transcription from RNA polymerase II promoter|transcription from RNA polymerase II promoter|transcription initiation from RNA polymerase II promoter|transcriptio…	nucleotide binding|single-stranded DNA binding|single-stranded RNA binding|DNA-directed RNA polymerase activity|translation initiation factor binding|	10	-3.7	12.3	10	-2.9	19.8	-3.1	-5.3	-2	30.6	0.00106	0
7174	TPP2	tripeptidyl peptidase II	nucleus|cytoplasm|cytosol|	protein polyubiquitination|antigen processing and presentation of peptide antigen via MHC class I|proteolysis|	endopeptidase activity|aminopeptidase activity|serine-type endopeptidase activity|tripeptidyl-peptidase activity|	5	-3.8	8.55	5	-5.4	23.3	-5.3	-9.8	-4.5	30.6	0.00106	0
51434	ANAPC7	anaphase promoting complex subunit 7	nucleus|nucleoplasm|anaphase-promoting complex|cytosol|	mitotic cell cycle|mitotic nuclear division|mitotic spindle assembly checkpoint|anaphase-promoting complex-dependent proteasomal ubiquitin-dependent protein catabolic process|negative regulation of ubiquitin-protein ligase activity involved in mitotic cell cycle|positive regulation of ubiquitin-protein ligase activity involved in mitotic cell cycle|regulation of ubiquitin-protein ligase activity …	protein phosphatase binding|	5	-6	22.5	5	-3	10.3	-6	-11.8	-4.9	30.4	0.0011	0
1175	AP2S1	adaptor-related protein complex 2, sigma 1 subunit	cytosol|plasma membrane|AP-2 adaptor complex|endocytic vesicle membrane|clathrin-coated endocytic vesicle membrane|	intracellular protein transport|endocytosis|epidermal growth factor receptor signaling pathway|synaptic transmission|axon guidance|viral process|antigen processing and presentation of exogenous peptide antigen via MHC class II|regulation of endocytosis|negative regulation of epidermal growth factor receptor signaling pathway|neurotrophin TRK receptor signaling pathway|clathrin coat assembly|regul…	transporter activity|protein transporter activity|	5	-3.9	23.9	5	-1.7	10.2	-3.8	-6.4	-1.3	30.4	0.0011	0
6161	RPL32	ribosomal protein L32	cytosol|membrane|cytosolic large ribosomal subunit|	nuclear-transcribed mRNA catabolic process, nonsense-mediated decay|translation|translation|translational initiation|translational elongation|translational termination|SRP-dependent cotranslational protein targeting to membrane|gene expression|viral process|RNA metabolic process|mRNA metabolic process|viral life cycle|viral transcription|cellular protein metabolic process|	structural constituent of ribosome|poly(A) RNA binding|	5	-2.8	12.1	5	-3.1	18.9	-3	-5.1	-2	30.4	0.0011	0
5393	EXOSC9	exosome component 9	nuclear exosome (RNase complex)|nuclear exosome (RNase complex)|exosome (RNase complex)|nucleus|nucleolus|cytoplasm|cytosol|intermediate filament cytoskeleton|	nuclear-transcribed mRNA catabolic process, deadenylation-dependent decay|nuclear-transcribed mRNA catabolic process|rRNA processing|immune response|gene expression|RNA metabolic process|mRNA metabolic process|positive regulation of cell growth|exonucleolytic nuclear-transcribed mRNA catabolic process involved in deadenylation-dependent decay|exonucleolytic nuclear-transcribed mRNA catabolic proc…	3'-5'-exoribonuclease activity|RNA binding|protein binding|AU-rich element binding|poly(A) RNA binding|	5	3.9	26.1	5	1.3	9.19	3.8	2.9	6.4	30.3	0.00112	0
84148	KAT8	K(lysine) acetyltransferase 8	histone acetyltransferase complex|kinetochore|nucleus|nucleoplasm|nuclear membrane|MLL1 complex|MSL complex|	chromatin organization|transcription, DNA-templated|histone acetylation|myeloid cell differentiation|histone H4-K5 acetylation|histone H4-K8 acetylation|histone H4-K16 acetylation|histone H4-K16 acetylation|negative regulation of transcription, DNA-templated|positive regulation of transcription, DNA-templated|positive regulation of transcription, DNA-templated|	histone acetyltransferase activity|protein binding|transcription factor binding|acetyltransferase activity|enzyme binding|methylated histone binding|histone acetyltransferase activity (H4-K5 specific)|histone acetyltransferase activity (H4-K8 specific)|metal ion binding|histone acetyltransferase activity (H4-K16 specific)|	10	3.8	12.6	10	3.1	18.5	3.5	2.7	6	30.3	0.00112	0
79050	NOC4L	nucleolar complex associated 4 homolog (S. cerevisiae)	nucleus|nucleolus|nucleolus|integral component of membrane|nuclear membrane|	rRNA processing|	protein binding|poly(A) RNA binding|	5	-2.6	8.58	5	-4.5	24.3	-4.4	-8.8	-3.1	30.3	0.00112	0
54512	EXOSC4	exosome component 4	exosome (RNase complex)|nucleus|nucleolus|cytoplasm|cytoplasm|cytosol|transcriptionally active chromatin|	nuclear-transcribed mRNA catabolic process, deadenylation-dependent decay|maturation of 5.8S rRNA|nuclear-transcribed mRNA catabolic process|rRNA processing|gene expression|RNA metabolic process|mRNA metabolic process|positive regulation of cell growth|exonucleolytic nuclear-transcribed mRNA catabolic process involved in deadenylation-dependent decay|DNA deamination|defense response to virus|nucl…	3'-5'-exoribonuclease activity|protein binding|AU-rich element binding|	5	4.2	21.6	5	1.5	13.7	4	2.4	6.7	30.2	0.00114	0
7111	TMOD1	tropomodulin 1	cytosol|COP9 signalosome|membrane|myofibril|cortical cytoskeleton|	adult locomotory behavior|muscle filament sliding|myofibril assembly|	actin binding|tropomyosin binding|	5	-4.9	23.1	5	-3.4	8.17	-4.8	-8.9	-3.9	30	0.00118	0
8739	HRK	harakiri, BCL2 interacting protein	mitochondrion|integral component of membrane|	apoptotic process|positive regulation of protein homooligomerization|positive regulation of apoptotic process|positive regulation of release of cytochrome c from mitochondria|	protein binding|	5	-4.3	29.9	5	-1.4	2.5	-4.2	-7.9	-3	29.9	0.0012	0
6147	RPL23A	ribosomal protein L23a	nucleus|cytosol|cytosolic large ribosomal subunit|cytosolic large ribosomal subunit|TORC2 complex|extracellular vesicular exosome|	nuclear-transcribed mRNA catabolic process, nonsense-mediated decay|translation|translation|translational initiation|translational elongation|translational termination|SRP-dependent cotranslational protein targeting to membrane|cell proliferation|gene expression|viral process|RNA metabolic process|mRNA metabolic process|viral life cycle|viral transcription|cellular protein metabolic process|	nucleotide binding|structural constituent of ribosome|protein binding|rRNA binding|poly(A) RNA binding|	5	-2.1	11.5	5	-2.4	19.2	-2.3	-3.9	-1.7	29.9	0.0012	0
51504	TRMT112	tRNA methyltransferase 11-2 homolog (S. cerevisiae)	protein complex|extracellular vesicular exosome|	peptidyl-glutamine methylation|	protein binding|protein methyltransferase activity|	5	-4.2	23.5	5	-3	7.62	-4.2	-7.8	-3.1	29.9	0.0012	0
51586	MED15	mediator complex subunit 15	nucleus|nucleoplasm|cytoplasm|membrane|mediator complex|	regulation of transcription from RNA polymerase II promoter|transcription initiation from RNA polymerase II promoter|gene expression|stem cell maintenance|	RNA polymerase II transcription cofactor activity|protein binding|	10	-2.4	6.68	10	-2.9	24	-2.8	-4.6	-2.1	29.7	0.00125	0
1977	EIF4E	eukaryotic translation initiation factor 4E	cytoplasmic mRNA processing body|cytoplasm|cytosol|mRNA cap binding complex|cytoplasmic stress granule|eukaryotic translation initiation factor 4F complex|RISC complex|chromatoid body|extracellular vesicular exosome|	G1/S transition of mitotic cell cycle|nuclear-transcribed mRNA catabolic process, deadenylation-dependent decay|nuclear-transcribed mRNA poly(A) tail shortening|mRNA export from nucleus|translation|translational initiation|regulation of translation|insulin receptor signaling pathway|gene expression|viral process|RNA metabolic process|mRNA metabolic process|cytokine-mediated signaling pathway|lung…	RNA cap binding|translation initiation factor activity|translation initiation factor activity|protein binding|eukaryotic initiation factor 4G binding|poly(A) RNA binding|	5	-2.6	8.37	5	-5.3	24.5	-5.1	-10	-3.9	29.6	0.00127	0
5713	PSMD7	proteasome (prosome, macropain) 26S subunit, non-ATPase, 7	proteasome complex|nucleus|nucleoplasm|cytosol|proteasome regulatory particle|membrane|extracellular vesicular exosome|	G1/S transition of mitotic cell cycle|protein polyubiquitination|mitotic cell cycle|antigen processing and presentation of peptide antigen via MHC class I|antigen processing and presentation of exogenous peptide antigen via MHC class I, TAP-dependent|regulation of cellular amino acid metabolic process|apoptotic process|DNA damage response, signal transduction by p53 class mediator resulting in ce…	protein binding|	5	-3.8	14.7	5	-3.6	15.3	-3.7	-6.3	-2.9	29.5	0.0013	0
5440	POLR2K	polymerase (RNA) II (DNA directed) polypeptide K, 7.0kDa	nucleus|nucleoplasm|DNA-directed RNA polymerase II, core complex|DNA-directed RNA polymerase III complex|DNA-directed RNA polymerase I complex|cytosol|	mRNA splicing, via spliceosome|DNA repair|transcription-coupled nucleotide-excision repair|nucleotide-excision repair|regulation of transcription from RNA polymerase I promoter|transcription from RNA polymerase I promoter|transcription initiation from RNA polymerase I promoter|transcription elongation from RNA polymerase I promoter|termination of RNA polymerase I transcription|transcription from …	RNA polymerase I activity|RNA polymerase II activity|RNA polymerase III activity|DNA binding|zinc ion binding|	5	-4.5	23.5	5	-3	7.14	-4.5	-8.8	-3.4	29.3	0.00134	0
57187	THOC2	THO complex 2	transcription export complex|THO complex|THO complex part of transcription export complex|nuclear speck|	mRNA processing|mRNA export from nucleus|RNA splicing|poly(A)+ mRNA export from nucleus|viral mRNA export from host cell nucleus|	RNA binding|protein binding|	4	-1.8	10.4	5	-3.1	21.3	-2.9	-4.8	-1.1	29.3	0.00134	0
65109	UPF3B	UPF3 regulator of nonsense transcripts homolog B (yeast)	nucleus|nucleus|nucleoplasm|cytoplasm|cytoplasm|cytosol|exon-exon junction complex|exon-exon junction complex|	nuclear-transcribed mRNA catabolic process, nonsense-mediated decay|nuclear-transcribed mRNA catabolic process, nonsense-mediated decay|nuclear-transcribed mRNA catabolic process, nonsense-mediated decay|nuclear-transcribed mRNA catabolic process, nonsense-mediated decay|mRNA splicing, via spliceosome|transcription from RNA polymerase II promoter|termination of RNA polymerase II transcription|mRN…	nucleotide binding|mRNA binding|nucleocytoplasmic transporter activity|protein binding|poly(A) RNA binding|	5	3.8	17.7	5	2.1	14.5	3.5	2.1	5.7	29.3	0.00134	0
5983	RFC3	replication factor C (activator 1) 3, 38kDa	nucleoplasm|DNA replication factor C complex|DNA replication factor C complex|	mitotic cell cycle|telomere maintenance via recombination|telomere maintenance|DNA synthesis involved in DNA repair|ATP catabolic process|DNA replication|DNA replication|DNA strand elongation involved in DNA replication|DNA repair|transcription-coupled nucleotide-excision repair|nucleotide-excision repair|nucleotide-excision repair, DNA gap filling|telomere maintenance via semi-conservative repli…	nucleotide binding|DNA binding|DNA clamp loader activity|protein binding|ATPase activity|	5	-1.9	11.7	5	-1.7	18	-1.8	-3.1	-1.3	29.2	0.00137	0
7324	UBE2E1	ubiquitin-conjugating enzyme E2E 1	ubiquitin ligase complex|nucleus|nucleoplasm|cytosol|	protein polyubiquitination|mitotic cell cycle|ubiquitin-dependent protein catabolic process|mitotic spindle assembly checkpoint|histone monoubiquitination|protein ubiquitination|cytokine-mediated signaling pathway|anaphase-promoting complex-dependent proteasomal ubiquitin-dependent protein catabolic process|ISG15-protein conjugation|histone H2B ubiquitination|negative regulation of ubiquitin-prot…	ubiquitin-protein transferase activity|protein binding|ATP binding|ISG15 ligase activity|	5	-5.6	24.2	5	-3.5	6.91	-5.5	-10.6	-4.2	29.2	0.00137	0
NARG2	NARG2	N/A	None	None	None	5	1.6	13	5	2.6	18.3	2.4	1.5	4	29.1	0.00139	0
81556	VWA9	von Willebrand factor A domain containing 9	None	None	None	5	-0.6	1.59	5	-2.1	30.1	-2.1	-3.7	-1.6	29.1	0.00139	0
63916	ELMO2	engulfment and cell motility 2	cytosol|cytosol|cytoskeleton|membrane|	apoptotic process|Fc-gamma receptor signaling pathway involved in phagocytosis|innate immune response|cell chemotaxis|	protein binding|SH3 domain binding|receptor tyrosine kinase binding|	4	-4.7	23.9	5	-3	6.33	-4.6	-8.9	-3.6	28.8	0.00149	0
55904	KMT2E	lysine (K)-specific methyltransferase 2E	cytoplasm|plasma membrane|nuclear speck|MLL5-L complex|	neutrophil mediated immunity|DNA methylation|transcription, DNA-templated|cell cycle arrest|erythrocyte differentiation|positive regulation of granulocyte differentiation|neutrophil activation|positive regulation of transcription, DNA-templated|retinoic acid receptor signaling pathway|histone H3-K4 methylation|cellular response to retinoic acid|	transcription coactivator activity|protein binding|zinc ion binding|enzyme binding|histone methyltransferase activity (H3-K4 specific)|	5	-1.9	12.4	5	-1.9	16.8	-1.9	-3.2	-1.3	28.8	0.00149	0
5976	UPF1	UPF1 regulator of nonsense transcripts homolog (yeast)	chromatin|cytoplasmic mRNA processing body|nucleus|cytoplasm|cytosol|exon-exon junction complex|supraspliceosomal complex|	nuclear-transcribed mRNA catabolic process, nonsense-mediated decay|nuclear-transcribed mRNA catabolic process, nonsense-mediated decay|nuclear-transcribed mRNA catabolic process, nonsense-mediated decay|nuclear-transcribed mRNA catabolic process, nonsense-mediated decay|nuclear-transcribed mRNA catabolic process|ATP catabolic process|DNA replication|DNA repair|mRNA export from nucleus|regulation…	DNA binding|chromatin binding|RNA binding|ATP-dependent RNA helicase activity|helicase activity|protein binding|ATP binding|zinc ion binding|poly(A) RNA binding|	4	3.3	12.8	5	2	18.5	2.9	1.6	4.7	28.7	0.00151	0
3646	EIF3E	eukaryotic translation initiation factor 3, subunit E	chromatin|nucleus|nucleoplasm|cytoplasm|cytosol|eukaryotic translation initiation factor 3 complex|eukaryotic translation initiation factor 3 complex|membrane|eukaryotic 43S preinitiation complex|PML body|eukaryotic 48S preinitiation complex|extracellular vesicular exosome|	nuclear-transcribed mRNA catabolic process, nonsense-mediated decay|formation of translation preinitiation complex|translation|translational initiation|translational initiation|translational initiation|regulation of translational initiation|gene expression|cellular protein metabolic process|negative regulation of translational initiation|	translation initiation factor activity|translation initiation factor activity|translation initiation factor activity|protein binding|poly(A) RNA binding|protein N-terminus binding|	5	-2.1	4.87	5	-5.2	27.1	-5.1	-10	-3.9	28.6	0.00154	0
10181	RBM5	RNA binding motif protein 5	nucleus|nucleoplasm|spliceosomal complex|	spliceosomal complex assembly|regulation of alternative mRNA splicing, via spliceosome|mRNA splicing, via spliceosome|RNA processing|apoptotic process|negative regulation of cell proliferation|RNA splicing|gene expression|positive regulation of apoptotic process|positive regulation of apoptotic process|	nucleotide binding|DNA binding|RNA binding|mRNA binding|protein binding|zinc ion binding|poly(A) RNA binding|	5	1.8	12.3	5	1.9	16.7	1.9	1.3	3.2	28.6	0.00154	0
60496	AASDHPPT	aminoadipate-semialdehyde dehydrogenase-phosphopantetheinyl transferase	cytosol|extracellular vesicular exosome|	vitamin metabolic process|water-soluble vitamin metabolic process|macromolecule biosynthetic process|pantothenate metabolic process|small molecule metabolic process|	magnesium ion binding|protein binding|holo-[acyl-carrier-protein] synthase activity|	5	-4.6	23.1	5	-3.7	6.51	-4.6	-8.5	-3.5	28.5	0.00158	0
11173	ADAMTS7	ADAM metallopeptidase with thrombospondin type 1 motif, 7	proteinaceous extracellular matrix|cell surface|	negative regulation of chondrocyte differentiation|proteolysis involved in cellular protein catabolic process|cellular response to interleukin-1|cellular response to tumor necrosis factor|cellular response to BMP stimulus|	metalloendopeptidase activity|protein binding|metallopeptidase activity|zinc ion binding|	5	-5.5	23.7	5	-3.8	6.37	-5.5	-10.6	-4.3	28.5	0.00158	0
1723	DHODH	dihydroorotate dehydrogenase (quinone)	mitochondrial inner membrane|integral component of membrane|neuronal cell body|	pyrimidine nucleobase metabolic process|'de novo' pyrimidine nucleobase biosynthetic process|female pregnancy|lactation|response to caffeine|response to drug|response to starvation|positive regulation of apoptotic process|'de novo' UMP biosynthetic process|small molecule metabolic process|pyrimidine nucleoside biosynthetic process|nucleobase-containing small molecule metabolic process|oxidation-r…	dihydroorotate dehydrogenase activity|dihydroorotate oxidase activity|drug binding|FMN binding|ubiquinone binding|	10	-4.6	25	10	-2	8.07	-4.4	-7.5	-1.5	28.5	0.00158	0
23381	SMG5	SMG5 nonsense mediated mRNA decay factor	nucleus|cytoplasm|cytosol|	nuclear-transcribed mRNA catabolic process, nonsense-mediated decay|mRNA export from nucleus|gene expression|RNA metabolic process|mRNA metabolic process|regulation of dephosphorylation|	protein binding|protein phosphatase 2A binding|	5	3	11.6	5	2.1	18.2	2.5	1.4	4.3	28.2	0.00166	0
689	BTF3	basic transcription factor 3	nucleus|cytoplasm|	in utero embryonic development|regulation of transcription, DNA-templated|transcription from RNA polymerase II promoter|protein transport|	protein binding|poly(A) RNA binding|	5	3.3	18.9	5	2	11.6	3	1.9	5	28.1	0.00169	0
3609	ILF3	interleukin enhancer binding factor 3, 90kDa	nucleus|nucleus|nucleolus|cytoplasm|mitochondrion|membrane|ribonucleoprotein complex|	M phase|transcription, DNA-templated|protein phosphorylation|negative regulation of translation|negative regulation of viral genome replication|negative regulation of transcription, DNA-templated|positive regulation of transcription, DNA-templated|defense response to virus|	DNA binding|RNA binding|double-stranded RNA binding|protein binding|poly(A) RNA binding|	5	-1.9	9.1	5	-1.6	19.5	-1.7	-3	-1.1	28.1	0.00169	0
90381	TICRR	TOPBP1-interacting checkpoint and replication regulator	nucleus|	cell cycle checkpoint|formation of translation preinitiation complex|DNA replication|DNA repair|response to ionizing radiation|regulation of DNA-dependent DNA replication initiation|mitotic DNA replication checkpoint|	chromatin binding|protein binding|	4	-1	3.09	4	-4.1	28.4	-4	-8	-2.3	28.1	0.00169	0
10407	SPAG11B	sperm associated antigen 11B	extracellular region|	spermatogenesis|	molecular_function|	5	-4.5	23.2	5	-1.8	8.35	-4.4	-9	-2.7	28	0.00172	0
9044	BTAF1	BTAF1 RNA polymerase II, B-TFIID transcription factor-associated, 170kDa	nucleus|	metabolic process|negative regulation of chromatin binding|negative regulation of transcription, DNA-templated|	DNA binding|sequence-specific DNA binding transcription factor activity|helicase activity|ATP binding|	5	2.9	17.1	5	1.7	13	2.4	1.3	4.1	27.9	0.00176	0
51043	ZBTB7B	zinc finger and BTB domain containing 7B	nucleus|	regulation of transcription, DNA-templated|transcription from RNA polymerase II promoter|multicellular organismal development|ectoderm development|cell differentiation|	DNA binding|metal ion binding|	5	-1.3	12.7	5	-3.6	19.7	-1.5	-4.8	-1	27.9	0.00176	0
22985	ACIN1	apoptotic chromatin condensation inducer 1	nucleus|cytoplasm|cytosol|plasma membrane|nuclear speck|exon-exon junction complex|ASAP complex|	ATP catabolic process|mRNA processing|apoptotic process|cellular component disassembly involved in execution phase of apoptosis|RNA splicing|erythrocyte differentiation|apoptotic chromosome condensation|positive regulation of apoptotic process|positive regulation of monocyte differentiation|negative regulation of mRNA splicing, via spliceosome|	nucleotide binding|nucleic acid binding|protein binding|ATPase activity|enzyme binding|poly(A) RNA binding|	10	-4.8	27.9	10	-0.9	4.25	-1.7	-7.1	-1.1	27.8	0.00179	0
11331	PHB2	prohibitin 2	nucleus|nucleus|mitochondrion|mitochondrial inner membrane|nuclear matrix|protein complex|extracellular vesicular exosome|	transcription, DNA-templated|negative regulation of intracellular estrogen receptor signaling pathway|negative regulation of mammary gland epithelial cell proliferation|negative regulation of transcription, DNA-templated|mammary gland branching involved in thelarche|mammary gland alveolus development|regulation of branching involved in mammary gland duct morphogenesis|	protein binding|estrogen receptor binding|	5	-1.7	6.52	5	-3	23.7	-2.9	-5.1	-1.6	27.8	0.00179	0
51118	UTP11L	UTP11-like, U3 small nucleolar ribonucleoprotein (yeast)	extracellular space|nucleolus|nucleolus|cytoplasm|small-subunit processome|	rRNA processing|nervous system development|ribosomal small subunit biogenesis|positive regulation of apoptotic process|	protein binding|poly(A) RNA binding|	5	-3.3	18.9	5	-3.4	9.33	-3.3	-5.8	-2.5	27.8	0.00179	0
10963	STIP1	stress-induced phosphoprotein 1	nucleus|Golgi apparatus|	response to stress|	protein binding|poly(A) RNA binding|	5	-2.2	12.7	5	-1.3	16.5	-1.5	-3.1	-1.1	27.7	0.00183	0
7335	UBE2V1	ubiquitin-conjugating enzyme E2 variant 1	ubiquitin ligase complex|nucleus|cytoplasm|cytosol|ubiquitin conjugating enzyme complex|UBC13-UEV1A complex|protein complex|extracellular vesicular exosome|	protein polyubiquitination|toll-like receptor signaling pathway|MyD88-dependent toll-like receptor signaling pathway|regulation of DNA repair|regulation of transcription, DNA-templated|cell differentiation|toll-like receptor 2 signaling pathway|toll-like receptor 4 signaling pathway|toll-like receptor 5 signaling pathway|toll-like receptor 9 signaling pathway|toll-like receptor 10 signaling pathw…	protein binding|acid-amino acid ligase activity|	5	-5.4	22.7	5	-3.8	5.96	-5.3	-9.9	-4.4	27.5	0.00191	0
8881	CDC16	cell division cycle 16	nucleoplasm|anaphase-promoting complex|cytoplasm|centrosome|spindle|cytosol|spindle microtubule|	mitotic cell cycle|mitotic nuclear division|regulation of mitosis|mitotic spindle assembly checkpoint|cell proliferation|anaphase-promoting complex-dependent proteasomal ubiquitin-dependent protein catabolic process|negative regulation of ubiquitin-protein ligase activity involved in mitotic cell cycle|positive regulation of ubiquitin-protein ligase activity involved in mitotic cell cycle|regulat…	protein binding|	5	-3.3	11.3	5	-1.6	19.7	-2.5	-4.4	-1.2	27.4	0.00196	0
8802	SUCLG1	succinate-CoA ligase, alpha subunit	mitochondrion|mitochondrial inner membrane|mitochondrial matrix|succinate-CoA ligase complex (GDP-forming)|extracellular vesicular exosome|	tricarboxylic acid cycle|tricarboxylic acid cycle|succinyl-CoA metabolic process|succinate metabolic process|cellular metabolic process|small molecule metabolic process|	ATP citrate synthase activity|succinate-CoA ligase (ADP-forming) activity|succinate-CoA ligase (GDP-forming) activity|GTP binding|GDP binding|poly(A) RNA binding|protein heterodimerization activity|cofactor binding|	5	-1.3	10.1	5	-1.8	18.5	-1.6	-2.9	-1	27.4	0.00196	0
9870	AREL1	apoptosis resistant E3 ubiquitin protein ligase 1	nucleus|cytoplasm|cytosol|	apoptotic process|protein ubiquitination involved in ubiquitin-dependent protein catabolic process|protein ubiquitination involved in ubiquitin-dependent protein catabolic process|negative regulation of apoptotic process|	ubiquitin-protein transferase activity|ubiquitin-protein transferase activity|ligase activity|	5	-4.1	22.3	5	-2.9	6.16	-4.1	-7.8	-3	27.3	0.002	0
8664	EIF3D	eukaryotic translation initiation factor 3, subunit D	cytosol|eukaryotic translation initiation factor 3 complex|membrane|eukaryotic 43S preinitiation complex|eukaryotic 48S preinitiation complex|	formation of translation preinitiation complex|formation of translation initiation complex|translation|translational initiation|translational initiation|translational initiation|regulation of translational initiation|gene expression|cellular protein metabolic process|	translation initiation factor activity|translation initiation factor activity|protein binding|poly(A) RNA binding|	5	-2	6.14	5	-3.9	23.9	-3.8	-6.6	-1.6	27.3	0.002	0
10799	RPP40	ribonuclease P/MRP 40kDa subunit	nucleus|nucleolar ribonuclease P complex|	tRNA processing|RNA phosphodiester bond hydrolysis|RNA phosphodiester bond hydrolysis, endonucleolytic|RNA phosphodiester bond hydrolysis, endonucleolytic|	ribonuclease P activity|	5	-4.1	23.2	5	-2.4	6.01	-4.1	-7.9	-2.8	27.3	0.002	0
51490	C9ORF114	chromosome 9 open reading frame 114	cellular_component|	biological_process|	poly(A) RNA binding|	5	-2.5	11.6	5	-3.3	17	-3.2	-5.4	-2.4	27.2	0.00205	0
55835	CENPJ	centromere protein J	centrosome|centriole|cytosol|microtubule|gamma-tubulin small complex|	G2/M transition of mitotic cell cycle|mitotic cell cycle|microtubule nucleation|centriole replication|regulation of centriole replication|microtubule polymerization|cell division|	protein binding|tubulin binding|protein kinase binding|protein domain specific binding|	5	-4.6	23.1	5	-3.7	5.04	-4.5	-8.6	-3.5	27.2	0.00205	0
10521	DDX17	DEAD (Asp-Glu-Ala-Asp) box helicase 17	nucleus|nucleolus|membrane|	ATP catabolic process|ATP catabolic process|transcription, DNA-templated|RNA processing|positive regulation of intracellular estrogen receptor signaling pathway|positive regulation of transcription from RNA polymerase II promoter|regulation of skeletal muscle cell differentiation|	transcription coactivator activity|RNA binding|RNA helicase activity|protein binding|ATP binding|ATP-dependent helicase activity|RNA-dependent ATPase activity|estrogen receptor binding|poly(A) RNA binding|	5	1.5	9.06	5	1.9	19	1.8	1.1	3.1	27.2	0.00205	0
60678	EEFSEC	eukaryotic elongation factor, selenocysteine-tRNA-specific	nucleus|mitochondrion|ribonucleoprotein complex|	selenocysteine incorporation|GTP catabolic process|	tRNA binding|translation elongation factor activity|GTPase activity|GTP binding|selenocysteine insertion sequence binding|ribonucleoprotein complex binding|	5	-2.4	4.72	5	-4.4	24.6	-4.3	-8	-3.1	27.2	0.00205	0
6449	SGTA	small glutamine-rich tetratricopeptide repeat (TPR)-containing, alpha	cytoplasm|	biological_process|viral process|	protein binding|	5	2.6	16.6	5	1.9	12.1	2.4	1.6	4	27.2	0.00205	0
221937	FOXK1	forkhead box K1	nucleus|nucleolus|	transcription, DNA-templated|regulation of transcription from RNA polymerase II promoter|muscle organ development|cell differentiation|negative regulation of cell growth|negative regulation of transcription, DNA-templated|positive regulation of transcription, DNA-templated|	sequence-specific DNA binding transcription factor activity|protein binding|sequence-specific DNA binding|	5	-1.5	13.1	5	-1.7	14.5	-1.6	-2.8	-1	27.1	0.0021	0
11030	RBPMS	RNA binding protein with multiple splicing	nucleus|cytoplasm|	transcription, DNA-templated|regulation of transcription, DNA-templated|RNA processing|positive regulation of pathway-restricted SMAD protein phosphorylation|positive regulation of SMAD protein import into nucleus|	nucleotide binding|transcription coactivator activity|protein binding|poly(A) binding|poly(A) RNA binding|	5	-3.6	5.4	5	-4.2	22.4	-4.1	-7.8	-3.4	27.1	0.0021	0
118460	EXOSC6	exosome component 6	exosome (RNase complex)|nucleolus|cytosol|	nuclear-transcribed mRNA catabolic process, deadenylation-dependent decay|rRNA processing|gene expression|RNA metabolic process|mRNA metabolic process|exonucleolytic nuclear-transcribed mRNA catabolic process involved in deadenylation-dependent decay|DNA deamination|isotype switching|	poly(A) RNA binding|	5	3.4	15.5	5	2.1	13.8	3.1	1.7	5.1	27	0.00216	0
401541	CENPP	centromere protein P	chromosome, centromeric region|nucleoplasm|cytosol|	mitotic cell cycle|nucleosome assembly|centromere-specific nucleosome assembly|	None	5	-2.8	4.02	5	-4.5	24.4	-4.4	-8.8	-3.4	26.8	0.00227	0
23479	ISCU	iron-sulfur cluster assembly enzyme	nucleus|cytoplasm|mitochondrion|mitochondrial matrix|cytosol|	nitrogen fixation|iron-sulfur cluster assembly|small molecule metabolic process|	iron ion binding|protein binding|protein complex scaffold|iron-sulfur cluster binding|	5	-3.9	23.4	5	-1.9	6.26	-3.8	-7.2	-2.5	26.8	0.00227	0
100996758	LOC100996758	neuropeptide Y receptor type 4-like	None	None	None	5	-4.1	22.6	5	-2.7	5.55	-4.1	-7.8	-2.9	26.8	0.00227	0
10575	CCT4	chaperonin containing TCP1, subunit 4 (delta)	zona pellucida receptor complex|nucleus|cytoplasm|centrosome|cytosol|chaperonin-containing T-complex|microtubule|melanosome|cell body|extracellular vesicular exosome|	protein folding|binding of sperm to zona pellucida|cellular protein metabolic process|'de novo' posttranslational protein folding|	protein binding|ATP binding|poly(A) RNA binding|unfolded protein binding|	5	-4.4	23.9	5	-1.6	6.89	-4.3	-9	-1.7	26.7	0.00232	0
11224	RPL35	ribosomal protein L35	nucleolus|cytoplasm|cytosol|membrane|cytosolic large ribosomal subunit|	nuclear-transcribed mRNA catabolic process, nonsense-mediated decay|translation|translation|translational initiation|translational elongation|translational termination|SRP-dependent cotranslational protein targeting to membrane|gene expression|viral process|RNA metabolic process|mRNA metabolic process|viral life cycle|viral transcription|cellular protein metabolic process|	mRNA binding|structural constituent of ribosome|poly(A) RNA binding|	5	-3	8.79	5	-4	19.3	-3.9	-7.2	-2.7	26.7	0.00232	0
8661	EIF3A	eukaryotic translation initiation factor 3, subunit A	nucleus|nucleolus|cytoplasm|cytoplasm|cytosol|eukaryotic translation initiation factor 3 complex|membrane|eukaryotic 43S preinitiation complex|eukaryotic 48S preinitiation complex|	formation of translation preinitiation complex|formation of translation initiation complex|translation|translational initiation|translational initiation|regulation of translational initiation|gene expression|cellular protein metabolic process|	translation initiation factor activity|translation initiation factor activity|structural molecule activity|protein binding|poly(A) RNA binding|	4	-3.2	11.3	3	-2.7	16.2	-3.1	-5.3	-2.1	26.6	0.00238	0
100529097	RPL36A-HNRNPH2	RPL36A-HNRNPH2 readthrough	None	None	None	5	-3.1	22	5	-1.4	7.76	-2.4	-4.6	-1.4	26.6	0.00238	0
84179	MFSD7	major facilitator superfamily domain containing 7	integral component of membrane|	transmembrane transport|	None	5	-4	17.9	5	-3.3	9.29	-3.9	-7.6	-3	26.4	0.00249	0
11157	LSM6	LSM6 homolog, U6 small nuclear RNA associated (S. cerevisiae)	spliceosomal complex|cytosol|small nuclear ribonucleoprotein complex|extracellular vesicular exosome|	nuclear-transcribed mRNA catabolic process, deadenylation-dependent decay|rRNA processing|mRNA processing|tRNA processing|RNA splicing|gene expression|RNA metabolic process|mRNA metabolic process|exonucleolytic nuclear-transcribed mRNA catabolic process involved in deadenylation-dependent decay|	protein binding|poly(A) RNA binding|	5	1.8	8.45	5	2.7	19.5	2.6	1.7	4.7	26.2	0.00261	0
51096	UTP18	UTP18 small subunit (SSU) processome component homolog (yeast)	nucleus|nucleolus|	rRNA processing|	poly(A) RNA binding|	5	-3.2	8.61	5	-4.1	18.9	-4	-7.3	-2.9	26.2	0.00261	0
54619	CCNJ	cyclin J	nucleus|	None	None	4	-4.9	24.2	3	1.9	4.32	-4.9	-10	-3.8	26.1	0.00267	0
8812	CCNK	cyclin K	cyclin K-CDK12 complex|cyclin K-CDK13 complex|nucleus|	regulation of cyclin-dependent protein serine/threonine kinase activity|in utero embryonic development|regulation of transcription, DNA-templated|transcription from RNA polymerase II promoter|protein phosphorylation|cellular response to DNA damage stimulus|mitotic nuclear division|negative regulation of cell cycle arrest|	cyclin-dependent protein serine/threonine kinase activity|protein binding|RNA polymerase II carboxy-terminal domain kinase activity|protein kinase binding|	10	-1.7	13.5	10	-1.3	13.3	-1.5	-2.4	-0.9	26.1	0.00267	0
1973	EIF4A1	eukaryotic translation initiation factor 4A1	cytosol|membrane|eukaryotic translation initiation factor 4F complex|extracellular vesicular exosome|	nuclear-transcribed mRNA catabolic process, deadenylation-dependent decay|nuclear-transcribed mRNA poly(A) tail shortening|ATP catabolic process|translation|translational initiation|gene expression|viral process|RNA metabolic process|mRNA metabolic process|cytokine-mediated signaling pathway|organ regeneration|cellular protein metabolic process|	RNA cap binding|double-stranded RNA binding|mRNA binding|translation initiation factor activity|helicase activity|protein binding|ATP binding|ATP-dependent helicase activity|translation factor activity, nucleic acid binding|poly(A) RNA binding|	5	-2.5	9.56	5	-2.7	17	-2.6	-4.5	-2	26.1	0.00267	0
153443	SRFBP1	serum response factor binding protein 1	nucleus|perinuclear region of cytoplasm|	transcription, DNA-templated|regulation of transcription, DNA-templated|	poly(A) RNA binding|	5	-2.7	19.5	5	-1.2	10.3	-2.6	-4.1	-1.4	26.1	0.00267	0
3313	HSPA9	heat shock 70kDa protein 9 (mortalin)	nucleolus|cytoplasm|mitochondrion|mitochondrion|mitochondrial nucleoid|extracellular vesicular exosome|	protein folding|protein export from nucleus|protein targeting to mitochondrion|negative regulation of apoptotic process|cellular protein metabolic process|	protein binding|ATP binding|enzyme binding|poly(A) RNA binding|unfolded protein binding|	5	-3.5	12.3	5	-3.3	14.2	-3.4	-6.1	-2.6	26	0.00273	0
7224	TRPC5	transient receptor potential cation channel, subfamily C, member 5	plasma membrane|integral component of plasma membrane|calcium channel complex|	calcium ion transport|nervous system development|axon guidance|ion transmembrane transport|transmembrane transport|calcium ion transmembrane transport|	calcium channel activity|protein binding|store-operated calcium channel activity|inositol 1,4,5 trisphosphate binding|	5	-3.3	4.06	5	-4.7	23	-4.6	-8.9	-3.8	26	0.00273	0
11129	CLASRP	CLK4-associating serine/arginine rich protein	nucleus|	mRNA processing|RNA splicing|	None	5	3	13.8	5	3.3	12.7	3.2	2.2	5.7	25.9	0.00281	0
92105	INTS4	integrator complex subunit 4	integrator complex|	snRNA processing|	protein binding|	5	-1.7	2.17	5	-2.7	24.9	-2.6	-4.4	-1.7	25.8	0.00289	0
6047	RNF4	ring finger protein 4	nucleus|cytoplasm|PML body|	transcription, DNA-templated|androgen receptor signaling pathway|proteasome-mediated ubiquitin-dependent protein catabolic process|positive regulation of transcription, DNA-templated|positive regulation of transcription from RNA polymerase II promoter|response to arsenic-containing substance|protein autoubiquitination|protein K63-linked ubiquitination|protein K48-linked ubiquitination|protein K11…	DNA binding|sequence-specific DNA binding transcription factor activity|transcription coactivator activity|ubiquitin-protein transferase activity|protein binding|transcription factor binding|zinc ion binding|ligase activity|nucleosome binding|SUMO polymer binding|androgen receptor binding|	5	-3.7	14.4	5	-3.8	11.8	-3.8	-6.5	-3	25.8	0.00289	0
1173	AP2M1	adaptor-related protein complex 2, mu 1 subunit	mitochondrion|lysosomal membrane|cytosol|plasma membrane|coated pit|clathrin adaptor complex|endocytic vesicle membrane|clathrin-coated endocytic vesicle membrane|extracellular vesicular exosome|	intracellular protein transport|endocytosis|epidermal growth factor receptor signaling pathway|synaptic transmission|axon guidance|viral process|antigen processing and presentation of exogenous peptide antigen via MHC class II|negative regulation of epidermal growth factor receptor signaling pathway|neurotrophin TRK receptor signaling pathway|regulation of defense response to virus by virus|membr…	transporter activity|protein binding|lipid binding|	10	-1.5	5.98	10	-4	24	-3.9	-7	-3	25.7	0.00297	0
6046	BRD2	bromodomain containing 2	nucleus|cytoplasm|	nucleosome assembly|transcription, DNA-templated|regulation of transcription from RNA polymerase II promoter|spermatogenesis|chromatin modification|	chromatin binding|protein binding|lysine-acetylated histone binding|	10	-2.5	2.4	10	2.9	26.4	2.9	1.9	5.4	25.7	0.00297	0
4670	HNRNPM	heterogeneous nuclear ribonucleoprotein M	nucleus|nucleoplasm|nucleoplasm|spliceosomal complex|integral component of plasma membrane|membrane|nuclear matrix|paraspeckles|catalytic step 2 spliceosome|	alternative mRNA splicing, via spliceosome|mRNA splicing, via spliceosome|mRNA splicing, via spliceosome|RNA splicing|gene expression|	nucleotide binding|RNA binding|protein binding|protein domain specific binding|poly(A) RNA binding|	10	-5.7	22.9	10	-3.7	4.89	-5.6	-10.5	-4.1	25.7	0.00297	0
5683	PSMA2	proteasome (prosome, macropain) subunit, alpha type, 2	proteasome complex|cytoplasmic mRNA processing body|nucleus|nucleoplasm|cytosol|proteasome core complex|proteasome core complex, alpha-subunit complex|extracellular vesicular exosome|	G1/S transition of mitotic cell cycle|protein polyubiquitination|mitotic cell cycle|antigen processing and presentation of peptide antigen via MHC class I|antigen processing and presentation of exogenous peptide antigen via MHC class I, TAP-dependent|regulation of cellular amino acid metabolic process|apoptotic process|DNA damage response, signal transduction by p53 class mediator resulting in ce…	threonine-type endopeptidase activity|protein binding|	5	-1.9	14.3	5	-1.7	12	-1.9	-3.3	-1.3	25.7	0.00297	0
1104	RCC1	regulator of chromosome condensation 1	nuclear chromatin|condensed nuclear chromosome|nucleus|nucleoplasm|cytoplasm|nuclear membrane|	G1/S transition of mitotic cell cycle|mitotic spindle organization|chromosome segregation|mitotic nuclear division|regulation of mitosis|viral process|positive regulation of Ran GTPase activity|positive regulation of Ran GTPase activity|spindle assembly|	chromatin binding|Ran guanyl-nucleotide exchange factor activity|protein binding|nucleosomal DNA binding|histone binding|	10	-1.6	16.6	10	-1.3	10.1	-1.5	-2.3	-1	25.7	0.00297	0
6173	RPL36A	ribosomal protein L36a	cytosol|ribosome|cytosolic large ribosomal subunit|	nuclear-transcribed mRNA catabolic process, nonsense-mediated decay|translation|translation|translational initiation|translational elongation|translational termination|SRP-dependent cotranslational protein targeting to membrane|gene expression|viral process|RNA metabolic process|mRNA metabolic process|viral life cycle|viral transcription|cellular protein metabolic process|	structural constituent of ribosome|poly(A) RNA binding|	5	-3.1	20.1	5	-1.4	8.89	-2.4	-4.5	-1.3	25.7	0.00297	0
4436	MSH2	mutS homolog 2	nuclear chromosome|membrane|MutSalpha complex|MutSbeta complex|	meiotic mismatch repair|in utero embryonic development|oxidative phosphorylation|ATP catabolic process|ATP catabolic process|ATP catabolic process|DNA repair|mismatch repair|mismatch repair|postreplication repair|double-strand break repair|meiotic gene conversion|cell cycle arrest|germ cell development|determination of adult lifespan|male gonad development|response to X-ray|response to X-ray|resp…	magnesium ion binding|four-way junction DNA binding|Y-form DNA binding|heteroduplex DNA loop binding|double-strand/single-strand DNA junction binding|DNA binding|double-stranded DNA binding|single-stranded DNA binding|protein binding|protein binding|ATP binding|protein C-terminus binding|DNA-dependent ATPase activity|ATPase activity|centromeric DNA binding|enzyme binding|protein kinase binding|mi…	5	-3.9	14.9	5	-4	11.1	-4	-7.7	-3.4	25.6	0.00305	0
160	AP2A1	adaptor-related protein complex 2, alpha 1 subunit	cytosol|plasma membrane|membrane|basolateral plasma membrane|apical plasma membrane|AP-2 adaptor complex|clathrin coat of trans-Golgi network vesicle|endocytic vesicle membrane|clathrin-coated endocytic vesicle membrane|	intracellular protein transport|Golgi to endosome transport|endocytosis|epidermal growth factor receptor signaling pathway|synaptic transmission|axon guidance|viral process|antigen processing and presentation of exogenous peptide antigen via MHC class II|negative regulation of epidermal growth factor receptor signaling pathway|neurotrophin TRK receptor signaling pathway|regulation of defense resp…	protein binding|protein C-terminus binding|protein transporter activity|protein kinase binding|	5	-4.4	25.2	5	-2	2.32	-4.4	-9	-3	25.5	0.00315	0
28985	MCTS1	malignant T cell amplified sequence 1	cytoplasm|plasma membrane|cytosolic small ribosomal subunit|	formation of translation preinitiation complex|IRES-dependent translational initiation|transcription, DNA-templated|regulation of transcription, DNA-templated|cellular response to DNA damage stimulus|cell cycle|positive regulation of cell proliferation|ribosome disassembly|regulation of growth|	RNA binding|	5	1.8	8.46	5	1.9	17.4	1.8	1.3	3.2	25.5	0.00315	0
51433	ANAPC5	anaphase promoting complex subunit 5	nucleus|nucleoplasm|anaphase-promoting complex|cytosol|	G2/M transition of mitotic cell cycle|mitotic anaphase|mitotic cell cycle|ubiquitin-dependent protein catabolic process|mitotic nuclear division|mitotic spindle assembly checkpoint|anaphase-promoting complex-dependent proteasomal ubiquitin-dependent protein catabolic process|negative regulation of ubiquitin-protein ligase activity involved in mitotic cell cycle|positive regulation of ubiquitin-pr…	ubiquitin-protein transferase activity|protein phosphatase binding|	5	-2.4	15.4	5	-1.5	11.3	-1.7	-3.5	-1.1	25.4	0.00323	0
10036	CHAF1A	chromatin assembly factor 1, subunit A (p150)	nuclear chromatin|CAF-1 complex|protein complex|	DNA replication|DNA repair|DNA replication-dependent nucleosome assembly|transcription, DNA-templated|regulation of transcription, DNA-templated|protein complex assembly|cell cycle|chromatin assembly|	chromatin binding|protein binding|identical protein binding|unfolded protein binding|chromo shadow domain binding|	5	3.1	10.4	5	2.8	15.4	3	1.9	5.2	25.3	0.00333	0
92196	DAPL1	death associated protein-like 1	None	apoptotic process|cell differentiation|	None	4	-0.5	0.668	4	-4.4	27.3	-4.3	-8	-3.4	25.3	0.00333	0
6218	RPS17	ribosomal protein S17	cytosol|ribosome|membrane|cytosolic small ribosomal subunit|cytosolic small ribosomal subunit|extracellular vesicular exosome|	ribosomal small subunit assembly|nuclear-transcribed mRNA catabolic process, nonsense-mediated decay|rRNA processing|translation|translation|translational initiation|translational initiation|translational elongation|translational elongation|translational termination|SRP-dependent cotranslational protein targeting to membrane|gene expression|viral process|RNA metabolic process|mRNA metabolic proce…	structural constituent of ribosome|poly(A) RNA binding|	5	-1.6	2.5	5	-4.6	25.4	-4.5	-9	-3.4	25.2	0.00343	0
257044	C1ORF101	chromosome 1 open reading frame 101	CatSper complex|	None	None	5	-2.9	3.04	5	-4.7	23.5	-4.6	-9	-3.8	25.1	0.00352	0
1477	CSTF1	cleavage stimulation factor, 3' pre-RNA, subunit 1, 50kDa	nucleus|nucleoplasm|	mRNA splicing, via spliceosome|transcription from RNA polymerase II promoter|termination of RNA polymerase II transcription|mRNA polyadenylation|mRNA cleavage|RNA processing|RNA splicing|gene expression|mRNA 3'-end processing|	RNA binding|protein binding|poly(A) RNA binding|	5	-2.5	10.1	5	-1.8	16.6	-2	-3.8	-1.4	25.1	0.00352	0
9442	MED27	mediator complex subunit 27	nucleus|nucleoplasm|transcription factor complex|nucleolus|cytoplasm|mediator complex|	regulation of transcription from RNA polymerase II promoter|transcription initiation from RNA polymerase II promoter|gene expression|stem cell maintenance|	transcription coactivator activity|	5	-2.8	3.35	5	-4.6	23.3	-4.5	-8.9	-3.7	25.1	0.00352	0
3613	IMPA2	inositol(myo)-1(or 4)-monophosphatase 2	cytoplasm|cytosol|	inositol biosynthetic process|phosphate-containing compound metabolic process|signal transduction|inositol phosphate metabolic process|small molecule metabolic process|phosphatidylinositol phosphorylation|inositol phosphate dephosphorylation|	inositol monophosphate 1-phosphatase activity|protein homodimerization activity|metal ion binding|inositol monophosphate 3-phosphatase activity|inositol monophosphate 4-phosphatase activity|	5	-5.1	23.3	5	-2.3	4.01	-5	-10	-3.9	25	0.00362	0
5981	RFC1	replication factor C (activator 1) 1, 145kDa	nucleus|nucleoplasm|DNA replication factor C complex|Golgi apparatus|cell junction|extracellular vesicular exosome|	negative regulation of transcription from RNA polymerase II promoter|mitotic cell cycle|telomere maintenance via recombination|telomere maintenance|ATP catabolic process|DNA-dependent DNA replication|DNA strand elongation involved in DNA replication|DNA repair|transcription-coupled nucleotide-excision repair|nucleotide-excision repair|nucleotide-excision repair, DNA gap filling|transcription, DNA…	DNA binding|DNA clamp loader activity|double-stranded DNA binding|protein binding|ATP binding|enzyme activator activity|protein domain specific binding|sequence-specific DNA binding|	5	-3.1	6.25	5	-3.4	19.3	-3.3	-5.8	-2.2	25	0.00362	0
11017	SNRNP27	small nuclear ribonucleoprotein 27kDa (U4/U6.U5)	cellular_component|nucleus|	mRNA processing|biological_process|RNA splicing|	nucleic acid binding|protein binding|	5	-1.8	9.68	5	-2.7	17.4	-2.6	-4.4	-1.8	25	0.00362	0
51010	EXOSC3	exosome component 3	nuclear exosome (RNase complex)|cytoplasmic exosome (RNase complex)|exosome (RNase complex)|nucleus|nucleolus|cytoplasm|cytosol|transcriptionally active chromatin|	nuclear-transcribed mRNA catabolic process, deadenylation-dependent decay|rRNA processing|gene expression|RNA metabolic process|mRNA metabolic process|exonucleolytic nuclear-transcribed mRNA catabolic process involved in deadenylation-dependent decay|exonucleolytic nuclear-transcribed mRNA catabolic process involved in deadenylation-dependent decay|DNA deamination|isotype switching|positive regul…	3'-5'-exoribonuclease activity|RNA binding|protein binding|	5	3.3	11.1	5	3.9	14.6	3.6	2.7	6.2	24.9	0.00371	0
4144	MAT2A	methionine adenosyltransferase II, alpha	cytosol|methionine adenosyltransferase complex|	sulfur amino acid metabolic process|S-adenosylmethionine biosynthetic process|S-adenosylmethionine biosynthetic process|one-carbon metabolic process|xenobiotic metabolic process|methylation|cellular nitrogen compound metabolic process|small molecule metabolic process|	methionine adenosyltransferase activity|protein binding|ATP binding|metal ion binding|	5	1.1	3.16	5	-2.3	24.5	-2.3	-4.2	-1.4	24.9	0.00371	0
8607	RUVBL1	RuvB-like AAA ATPase 1	Swr1 complex|nucleus|nucleoplasm|cytoplasm|Golgi apparatus|microtubule organizing center|membrane|nuclear matrix|Ino80 complex|NuA4 histone acetyltransferase complex|intracellular membrane-bounded organelle|extracellular vesicular exosome|MLL1 complex|	DNA repair|DNA recombination|chromatin organization|nucleosome assembly|transcription, DNA-templated|regulation of transcription from RNA polymerase II promoter|mitotic nuclear division|spermatogenesis|DNA duplex unwinding|DNA duplex unwinding|centromere-specific nucleosome assembly|regulation of growth|histone H4 acetylation|histone H2A acetylation|	DNA helicase activity|protein binding|ATP binding|	5	3.6	17.2	5	1.8	10.6	3.3	1.5	5.3	24.9	0.00371	0
6923	TCEB2	transcription elongation factor B (SIII), polypeptide 2 (18kDa, elongin B)	nucleoplasm|cytosol|Cul2-RING ubiquitin ligase complex|Cul5-RING ubiquitin ligase complex|extracellular vesicular exosome|elongin complex|	transcription from RNA polymerase II promoter|transcription elongation from RNA polymerase II promoter|protein complex assembly|gene expression|viral process|protein ubiquitination|positive regulation of viral transcription|regulation of transcription from RNA polymerase II promoter in response to hypoxia|cellular response to hypoxia|	protein binding|ubiquitin protein ligase binding|	5	-2.6	14.8	5	-2.7	10.5	-2.7	-4.4	-1.8	24.9	0.00371	0
79637	ARMC7	armadillo repeat containing 7	cytoplasm|	None	None	5	1.4	7.3	5	3.1	20.4	3	0.9	5.1	24.6	0.00401	0
84337	ELOF1	elongation factor 1 homolog (S. cerevisiae)	nucleus|	transcription, DNA-templated|regulation of transcription, DNA-templated|	metal ion binding|	5	-2.5	16.3	5	-2	9.3	-2.3	-4.1	-1.6	24.6	0.00401	0
9361	LONP1	lon peptidase 1, mitochondrial	cytoplasm|mitochondrion|mitochondrial matrix|membrane|mitochondrial nucleoid|	mitochondrial genome maintenance|response to hypoxia|ATP catabolic process|misfolded or incompletely synthesized protein catabolic process|mitochondrion organization|aging|response to hormone|response to aluminum ion|mitochondrial DNA metabolic process|cellular response to oxidative stress|cellular response to oxidative stress|chaperone-mediated protein complex assembly|protein homooligomerizatio…	single-stranded DNA binding|single-stranded RNA binding|ATP-dependent peptidase activity|serine-type endopeptidase activity|protein binding|ATP binding|ADP binding|sequence-specific DNA binding|G-quadruplex DNA binding|DNA polymerase binding|mitochondrial light strand promoter anti-sense binding|mitochondrial heavy strand promoter anti-sense binding|	5	-2.4	9.34	5	-2	15.8	-2.2	-3.9	-1.5	24.4	0.00422	0
79954	NOL10	nucleolar protein 10	nucleolus|	None	poly(A) RNA binding|	5	-3.2	15.3	5	-3.7	10	-3.6	-6.1	-2.5	24.4	0.00422	0
91746	YTHDC1	YTH domain containing 1	nucleus|	mRNA splice site selection|	RNA binding|protein binding|poly(A) RNA binding|	5	-2.6	12	5	-2.1	13.2	-2.3	-3.9	-1.3	24.3	0.00433	0
6625	SNRNP70	small nuclear ribonucleoprotein 70kDa (U1)	nucleus|nucleoplasm|spliceosomal complex|U1 snRNP|nuclear speck|	mRNA splicing, via spliceosome|mRNA splicing, via spliceosome|mRNA splicing, via spliceosome|mRNA processing|RNA splicing|gene expression|regulation of RNA splicing|	nucleotide binding|RNA binding|protein binding|poly(A) RNA binding|	5	-4	18.7	5	-1.5	10.3	-3.9	-7	-0.8	24.2	0.00444	0
653423	SPAG11A	sperm associated antigen 11A	extracellular region|	None	None	5	-4.5	23.1	5	-1.5	4.69	-4.5	-9	-2.8	24.2	0.00444	0
100287718	ANKRD66	ankyrin repeat domain 66	None	None	None	5	-4.5	26.5	5	-0.4	1.23	-4.5	-9	-2.6	24.1	0.00455	0
6790	AURKA	aurora kinase A	nucleus|centrosome|centrosome|spindle|cytosol|spindle microtubule|microtubule cytoskeleton|midbody|spindle pole centrosome|perinuclear region of cytoplasm|	G2/M transition of mitotic cell cycle|mitotic cell cycle|protein phosphorylation|cell cycle|spindle organization|mitotic nuclear division|cell projection organization|anaphase-promoting complex-dependent proteasomal ubiquitin-dependent protein catabolic process|regulation of protein stability|negative regulation of protein binding|spindle stabilization|positive regulation of mitosis|regulation of…	protein kinase activity|protein serine/threonine kinase activity|protein serine/threonine/tyrosine kinase activity|protein binding|ATP binding|protein kinase binding|ubiquitin protein ligase binding|	5	-4.3	25.5	5	-0.8	2.76	-4.2	-8	-1	24.1	0.00455	0
65980	BRD9	bromodomain containing 9	cellular_component|	transcription, DNA-templated|regulation of transcription, DNA-templated|biological_process|chromatin modification|	nucleic acid binding|lysine-acetylated histone binding|	5	-2.8	3.37	5	-6.1	22.9	-6.1	-11.8	-5.3	24	0.00467	0
6165	RPL35A	ribosomal protein L35a	cytosol|membrane|cytosolic large ribosomal subunit|extracellular vesicular exosome|	nuclear-transcribed mRNA catabolic process, nonsense-mediated decay|rRNA processing|translation|translation|translational initiation|translational elongation|translational termination|SRP-dependent cotranslational protein targeting to membrane|gene expression|viral process|RNA metabolic process|mRNA metabolic process|viral life cycle|viral transcription|ribosomal large subunit biogenesis|cellular…	tRNA binding|structural constituent of ribosome|poly(A) RNA binding|	5	-4.7	23.9	5	-1.4	3.13	-4.7	-9	-3	24	0.00467	0
201191	SAMD14	sterile alpha motif domain containing 14	None	None	None	5	-2.2	2.59	5	-4.7	23.5	-4.6	-9	-3.8	24	0.00467	0
11066	SNRNP35	small nuclear ribonucleoprotein 35kDa (U11/U12)	nucleus|U12-type spliceosomal complex|	mRNA processing|RNA splicing|	nucleotide binding|RNA binding|	5	-4	26.3	5	-0.4	0.841	-4	-8	-2.6	24	0.00467	0
506	ATP5B	ATP synthase, H+ transporting, mitochondrial F1 complex, beta polypeptide	nucleus|mitochondrion|mitochondrial proton-transporting ATP synthase complex|mitochondrial proton-transporting ATP synthase, catalytic core|mitochondrial matrix|mitochondrial matrix|plasma membrane|cell surface|membrane|mitochondrial membrane|mitochondrial nucleoid|extracellular vesicular exosome|	angiogenesis|osteoblast differentiation|generation of precursor metabolites and energy|ATP catabolic process|lipid metabolic process|ATP biosynthetic process|negative regulation of cell adhesion involved in substrate-bound cell migration|ATP hydrolysis coupled proton transport|proton transport|respiratory electron transport chain|mitochondrial ATP synthesis coupled proton transport|mitochondrial …	transporter activity|protein binding|ATP binding|ATPase activity|transmembrane transporter activity|MHC class I protein binding|proton-transporting ATP synthase activity, rotational mechanism|proton-transporting ATPase activity, rotational mechanism|	5	-1.5	12.4	5	-2.9	14.4	-2.7	-4.6	-1.3	23.9	0.00479	0
83999	KREMEN1	kringle containing transmembrane protein 1	membrane|integral component of membrane|	cell communication|Wnt signaling pathway|regulation of canonical Wnt signaling pathway|	protein binding|	5	-4.3	23.2	5	-1.6	3.28	-4.3	-8	-3	23.9	0.00479	0
5606	MAP2K3	mitogen-activated protein kinase kinase 3	nucleoplasm|cytosol|membrane|	activation of MAPK activity|toll-like receptor signaling pathway|MyD88-dependent toll-like receptor signaling pathway|MyD88-independent toll-like receptor signaling pathway|inflammatory response|signal transduction|peptidyl-tyrosine phosphorylation|toll-like receptor 2 signaling pathway|toll-like receptor 3 signaling pathway|toll-like receptor 4 signaling pathway|toll-like receptor 5 signaling pa…	protein serine/threonine kinase activity|MAP kinase kinase activity|protein tyrosine kinase activity|protein binding|ATP binding|protein kinase binding|	5	-2.5	14.8	5	-1.3	11.4	-1.7	-3.5	-1	23.9	0.00479	0
9412	MED21	mediator complex subunit 21	mediator complex|	blastocyst development|transcription, DNA-templated|regulation of transcription from RNA polymerase II promoter|stem cell maintenance|positive regulation of transcription from RNA polymerase II promoter|	transcription coactivator activity|DNA-directed RNA polymerase activity|	5	-1.7	3.37	5	-3.1	22.4	-3	-5.3	-1.2	23.9	0.00479	0
8436	SDPR	serum deprivation response	cytoplasm|cytosol|caveola|	None	phosphatidylserine binding|protein binding|phospholipid binding|	5	-3.9	13.9	5	-4	10.5	-3.9	-7.7	-3.4	23.9	0.00479	0
8697	CDC23	cell division cycle 23	intracellular|nucleoplasm|anaphase-promoting complex|cytosol|	mitotic G1 phase|mitotic cell cycle|ubiquitin-dependent protein catabolic process|cell cycle|mitotic nuclear division|mitotic metaphase plate congression|metaphase/anaphase transition of mitotic cell cycle|mitotic spindle assembly checkpoint|regulation of exit from mitosis|regulation of mitotic metaphase/anaphase transition|anaphase-promoting complex-dependent proteasomal ubiquitin-dependent prot…	ubiquitin-protein transferase activity|	5	-2.3	23.8	4	-0.6	2.92	-2.1	-4.1	-1.4	23.8	0.00491	0
29091	STXBP6	syntaxin binding protein 6 (amisyn)	cytoplasm|integral component of membrane|	vesicle-mediated transport|	None	5	-2.1	3.06	5	-4.3	22.9	-4.2	-8	-3.2	23.8	0.00491	0
56893	UBQLN4	ubiquilin 4	nucleus|cytoplasm|endoplasmic reticulum membrane|centrosome|cytosol|nuclear proteasome complex|cytosolic proteasome complex|intracellular membrane-bounded organelle|perinuclear region of cytoplasm|	regulation of proteasomal ubiquitin-dependent protein catabolic process|	protein binding|polyubiquitin binding|identical protein binding|	5	-4.8	23.8	5	-1.9	2.08	-4.7	-9	-3.5	23.8	0.00491	0
53981	CPSF2	cleavage and polyadenylation specific factor 2, 100kDa	nucleoplasm|mRNA cleavage and polyadenylation specificity factor complex|membrane|	mRNA splicing, via spliceosome|transcription from RNA polymerase II promoter|termination of RNA polymerase II transcription|mRNA polyadenylation|mRNA cleavage|histone mRNA 3'-end processing|mRNA export from nucleus|RNA splicing|gene expression|mRNA 3'-end processing|	RNA binding|protein binding|hydrolase activity|	5	-3.3	11.9	5	-2.8	12.6	-3.1	-5.3	-2.2	23.7	0.00504	0
2896	GRN	granulin	extracellular space|mitochondrion|intracellular membrane-bounded organelle|extracellular vesicular exosome|	blastocyst hatching|signal transduction|embryo implantation|cell death|positive regulation of epithelial cell proliferation|	cytokine activity|protein binding|growth factor activity|poly(A) RNA binding|	5	1.9	2.71	5	4.5	23.2	4.5	3.5	9	23.5	0.00532	0
6059	ABCE1	ATP-binding cassette, sub-family E (OABP), member 1	cytoplasm|mitochondrion|membrane|	ATP catabolic process|RNA catabolic process|response to virus|viral process|negative regulation of catalytic activity|	ATP binding|ribonuclease inhibitor activity|ATPase activity|iron-sulfur cluster binding|	5	-1.7	7.04	5	-3.1	18.6	-3	-5.4	-1.7	23.4	0.00546	0
2926	GRSF1	G-rich RNA sequence binding factor 1	cytoplasm|mitochondrion|mitochondrial nucleoid|	mRNA polyadenylation|tRNA processing|anterior/posterior pattern specification|morphogenesis of embryonic epithelium|	nucleotide binding|RNA binding|mRNA binding|poly(A) RNA binding|	5	-3.7	12.6	5	-3.1	11.6	-3.6	-6.5	-2.6	23.4	0.00546	0
399909	PCNXL3	pecanex-like 3 (Drosophila)	integral component of membrane|	None	None	5	-4.6	26.2	5	1.7	2.71	-4.6	-9	-3.2	23.4	0.00546	0
11258	DCTN3	dynactin 3 (p22)	condensed chromosome kinetochore|centrosome|spindle|cytosol|dynactin complex|midbody|cleavage furrow|perinuclear region of cytoplasm|	G2/M transition of mitotic cell cycle|mitotic cell cycle|cytokinesis|microtubule-based process|mitotic nuclear division|antigen processing and presentation of exogenous peptide antigen via MHC class II|	structural molecule activity|protein binding|	5	-1.7	11.4	5	-2.8	14.3	-2.7	-4.3	-1	23.2	0.00574	0
1656	DDX6	DEAD (Asp-Glu-Ala-Asp) box helicase 6	cytoplasmic mRNA processing body|cytoplasm|cytosol|cytoplasmic stress granule|membrane|RISC complex|intracellular membrane-bounded organelle|	nuclear-transcribed mRNA catabolic process, deadenylation-dependent decay|ATP catabolic process|gene expression|RNA metabolic process|mRNA metabolic process|cytoplasmic mRNA processing body assembly|exonucleolytic nuclear-transcribed mRNA catabolic process involved in deadenylation-dependent decay|	RNA helicase activity|helicase activity|protein binding|ATP binding|ATP-dependent helicase activity|poly(A) RNA binding|	5	4.3	10.4	5	3.4	13.8	4.2	2.9	7.5	23.2	0.00574	0
23360	FNBP4	formin binding protein 4	nucleus|	None	protein binding|	5	2	11	5	2.2	12.6	2.1	1.3	3.7	23.2	0.00574	0
6944	VPS72	vacuolar protein sorting 72 homolog (S. cerevisiae)	nucleus|nucleoplasm|protein complex|	negative regulation of transcription from RNA polymerase II promoter|chromatin organization|transcription, DNA-templated|chromatin modification|somatic stem cell maintenance|	DNA binding|protein binding|	5	1.7	7.9	5	1.8	15.7	1.8	1.2	3.2	23.2	0.00574	0
9406	ZRANB2	zinc finger, RAN-binding domain containing 2	nucleus|	regulation of transcription, DNA-templated|mRNA processing|RNA splicing|	sequence-specific DNA binding transcription factor activity|RNA binding|protein binding|zinc ion binding|poly(A) RNA binding|	5	1.1	3.15	5	4.3	23.7	4.1	2.3	8	23.2	0.00574	0
3679	ITGA7	integrin, alpha 7	cytoplasm|plasma membrane|muscle tendon junction|cell surface|neuromuscular junction|integrin alpha7-beta1 complex|sarcolemma|	cell-matrix adhesion|integrin-mediated signaling pathway|muscle organ development|skeletal muscle tissue development|regulation of cell shape|cell migration|extracellular matrix organization|blood vessel morphogenesis|	integrin binding|laminin binding|metal ion binding|protein heterodimerization activity|	10	1.6	8.14	10	3	18.8	2.8	0.8	4.5	23.1	0.0059	0
6873	TAF2	TAF2 RNA polymerase II, TATA box binding protein (TBP)-associated factor, 150kDa	transcription factor TFIID complex|transcription factor TFIID complex|transcription factor TFTC complex|	G2/M transition of mitotic cell cycle|transcription initiation from RNA polymerase II promoter|proteolysis|response to organic cyclic compound|positive regulation of transcription from RNA polymerase II promoter|	protein binding|metallopeptidase activity|zinc ion binding|transcription regulatory region DNA binding|	5	2.5	4.79	5	-3.7	24.6	-3.7	-6.5	-1.7	23	0.00606	0
55236	UBA6	ubiquitin-like modifier activating enzyme 6	cytoplasm|cytosol|	ubiquitin-dependent protein catabolic process|protein ubiquitination|protein ubiquitination|	protein binding|ATP binding|ligase activity|FAT10 activating enzyme activity|	5	3	9.35	5	1.4	17	1.7	1.1	4.2	23	0.00606	0
23649	POLA2	polymerase (DNA directed), alpha 2, accessory subunit	nucleus|nucleoplasm|alpha DNA polymerase:primase complex|cytoplasm|	protein import into nucleus, translocation|G1/S transition of mitotic cell cycle|mitotic cell cycle|telomere maintenance via recombination|telomere maintenance|DNA replication|DNA replication initiation|DNA replication initiation|DNA strand elongation involved in DNA replication|telomere maintenance via semi-conservative replication|	molecular_function|DNA binding|DNA-directed DNA polymerase activity|protein heterodimerization activity|	5	-1.5	8.02	5	-3.4	18.3	-3.2	-5.3	-1.3	22.9	0.00622	0
10153	CEBPZ	CCAAT/enhancer binding protein (C/EBP), zeta	nucleus|	transcription from RNA polymerase II promoter|positive regulation of transcription from RNA polymerase II promoter|	RNA polymerase II core promoter proximal region sequence-specific DNA binding|RNA polymerase II core promoter proximal region sequence-specific DNA binding transcription factor activity involved in positive regulation of transcription|DNA binding|poly(A) RNA binding|	5	-1.6	7.87	5	-4.1	18.9	-3.9	-7.7	-1.9	22.8	0.00639	0
55127	HEATR1	HEAT repeat containing 1	nucleus|nucleolus|mitochondrion|membrane|ribonucleoprotein complex|	rRNA processing|	protein binding|poly(A) RNA binding|	5	-2.4	10.3	5	-1.9	13.5	-2	-3.7	-1.3	22.8	0.00639	0
10095	ARPC1B	actin related protein 2/3 complex, subunit 1B, 41kDa	cytoplasm|Arp2/3 protein complex|actin cytoskeleton|extracellular vesicular exosome|	cellular component movement|regulation of actin filament polymerization|	actin binding|structural constituent of cytoskeleton|	5	5.7	22.6	5	1.8	2.85	5.7	4.6	11	22.7	0.00656	0
155051	CRYGN	crystallin, gamma N	None	None	None	5	-4.3	24.6	5	-0.9	0.622	-4.3	-8	-2.5	22.7	0.00656	0
79902	NUP85	nucleoporin 85kDa	kinetochore|condensed chromosome kinetochore|nuclear envelope|spindle|cytosol|membrane|nuclear pore outer ring|nuclear pore outer ring|nuclear membrane|	mitotic cell cycle|carbohydrate metabolic process|mitotic nuclear envelope disassembly|hexose transport|regulation of glucose transport|protein transport|glucose transport|viral process|cytokine-mediated signaling pathway|lamellipodium assembly|small molecule metabolic process|macrophage chemotaxis|mRNA transport|transmembrane transport|	protein binding|	5	-2.1	14.4	5	-2.6	9.31	-2.5	-4.2	-1.5	22.7	0.00656	0
23383	MAU2	MAU2 sister chromatid cohesion factor	chromatin|nucleus|nucleoplasm|nucleoplasm|SMC loading complex|SMC loading complex|	mitotic cell cycle|maintenance of mitotic sister chromatid cohesion|	protein binding|protein N-terminus binding|	5	1.7	10	5	1.6	12.9	1.7	0.8	2.9	22.6	0.00675	0
4841	NONO	non-POU domain containing, octamer-binding	nucleus|nucleus|membrane|nuclear matrix|nuclear speck|paraspeckles|	DNA repair|DNA recombination|transcription, DNA-templated|mRNA processing|circadian rhythm|RNA splicing|regulation of circadian rhythm|negative regulation of transcription, DNA-templated|	nucleotide binding|core promoter binding|protein binding|identical protein binding|poly(A) RNA binding|	5	-2	10.8	5	-1.1	13.3	-1.2	-2.8	-0.8	22.6	0.00675	0
30010	NXPH1	neurexophilin 1	extracellular region|	None	receptor binding|	5	-1.3	3.15	4	-4.2	22.9	-4.2	-8	-3.1	22.6	0.00675	0
6133	RPL9	ribosomal protein L9	nucleus|nucleolus|cytoplasm|cytosol|ribosome|membrane|cytosolic large ribosomal subunit|	nuclear-transcribed mRNA catabolic process, nonsense-mediated decay|translation|translation|translational initiation|translational elongation|translational termination|SRP-dependent cotranslational protein targeting to membrane|gene expression|viral process|RNA metabolic process|mRNA metabolic process|viral life cycle|viral transcription|cellular protein metabolic process|	RNA binding|structural constituent of ribosome|rRNA binding|	4	-2.2	11.3	5	-2.1	11.8	-2.2	-3.7	-1.7	22.6	0.00675	0
8568	RRP1	ribosomal RNA processing 1	nucleus|nucleolus|preribosome, small subunit precursor|	rRNA processing|	poly(A) RNA binding|	5	-3.3	11.6	5	-3.3	11.3	-3.3	-6.2	-2.5	22.5	0.00693	0
KIAA0947	KIAA0947	N/A	None	None	None	5	1.7	16.2	5	1	7.4	1.4	0.9	2.5	22.4	0.00712	0
541468	LURAP1	leucine rich adaptor protein 1	cytoplasm|actomyosin|	positive regulation of cytokine production|cell migration|actomyosin structure organization|positive regulation of I-kappaB kinase/NF-kappaB signaling|	None	4	5.2	24.6	4	0.4	0.316	5.2	4.1	10	22.4	0.00712	0
10848	PPP1R13L	protein phosphatase 1, regulatory subunit 13 like	nucleus|cytoplasm|cell junction|	negative regulation of transcription from RNA polymerase II promoter|cardiac right ventricle morphogenesis|ventricular cardiac muscle tissue development|transcription, DNA-templated|apoptotic process|post-embryonic development|embryonic camera-type eye development|multicellular organism growth|hair cycle|multicellular organismal homeostasis|cardiac muscle contraction|	transcription corepressor activity|protein binding|transcription factor binding|identical protein binding|	9	-5.3	20.9	9	-1.8	6.39	-5.2	-10	-3	22.4	0.00712	0
7424	VEGFC	vascular endothelial growth factor C	extracellular region|extracellular space|membrane|platelet alpha granule lumen|	angiogenesis|positive regulation of neuroblast proliferation|platelet degranulation|substrate-dependent cell migration|signal transduction|blood coagulation|positive regulation of cell proliferation|organ morphogenesis|morphogenesis of embryonic epithelium|platelet activation|regulation of vascular endothelial growth factor receptor signaling pathway|positive regulation of protein autophosphoryla…	protein binding|growth factor activity|chemoattractant activity|vascular endothelial growth factor receptor 3 binding|	5	-5	22.9	5	-1.2	3.51	-4.9	-10	-3.8	22.4	0.00712	0
22	ABCB7	ATP-binding cassette, sub-family B (MDR/TAP), member 7	mitochondrion|mitochondrial inner membrane|mitochondrial inner membrane|integral component of membrane|	ATP catabolic process|transport|cellular iron ion homeostasis|heme transport|small molecule metabolic process|transmembrane transport|transmembrane transport|	ATP binding|heme transporter activity|ATPase activity, coupled to transmembrane movement of substances|	5	-1.7	12.5	5	-1.1	11.1	-1.5	-2.6	-0.9	22.2	0.00755	0
54904	WHSC1L1	Wolf-Hirschhorn syndrome candidate 1-like 1	nucleus|chromosome|	transcription, DNA-templated|regulation of transcription, DNA-templated|histone methylation|histone lysine methylation|histone lysine methylation|	protein binding|zinc ion binding|histone-lysine N-methyltransferase activity|	5	-4.9	22.9	5	-1	3.62	-4.9	-9	-3.6	22.2	0.00755	0
374655	ZNF710	zinc finger protein 710	nucleus|	transcription, DNA-templated|regulation of transcription, DNA-templated|	DNA binding|metal ion binding|	5	-4.2	23.2	5	-1.1	1.94	-4.1	-8	-2.1	22.2	0.00755	0
2491	CENPI	centromere protein I	kinetochore|nucleoplasm|cytosol|	mitotic cell cycle|nucleosome assembly|sex differentiation|centromere-specific nucleosome assembly|	protein binding|	5	-2.9	9.55	5	-2.9	12.7	-2.9	-5.2	-1.9	21.9	0.00831	0
51373	MRPS17	mitochondrial ribosomal protein S17	mitochondrial small ribosomal subunit|	translation|	structural constituent of ribosome|rRNA binding|	5	-1.4	8.79	5	-1.5	13.6	-1.4	-2.5	-0.8	21.9	0.00831	0
55701	ARHGEF40	Rho guanine nucleotide exchange factor (GEF) 40	cytoplasm|	positive regulation of Rho GTPase activity|	Rho guanyl-nucleotide exchange factor activity|	5	-3.4	4.41	5	-3.1	17.9	-3.3	-5.7	-2.5	21.8	0.00857	0
2959	GTF2B	general transcription factor IIB	nucleoplasm|	regulation of transcription, DNA-templated|transcription from RNA polymerase II promoter|transcription initiation from RNA polymerase II promoter|transcription elongation from RNA polymerase II promoter|gene expression|viral process|	core promoter binding|protein binding|transcription factor binding|zinc ion binding|TBP-class protein binding|thyroid hormone receptor binding|	5	-2.7	4.26	5	-2.5	18	-2.6	-4.5	-1.7	21.8	0.00857	0
10594	PRPF8	pre-mRNA processing factor 8	nucleus|nucleoplasm|U5 snRNP|membrane|nuclear speck|catalytic step 2 spliceosome|	RNA splicing, via transesterification reactions|mRNA splicing, via spliceosome|mRNA splicing, via spliceosome|mRNA processing|RNA splicing|gene expression|	protein binding|U6 snRNA binding|U5 snRNA binding|poly(A) RNA binding|	5	2.1	7.36	5	-1.9	23.9	-1.8	-3.6	-1.3	21.8	0.00857	0
5978	REST	RE1-silencing transcription factor	nucleus|nucleus|cytosol|transcriptional repressor complex|	negative regulation of transcription from RNA polymerase II promoter|negative regulation of transcription from RNA polymerase II promoter|regulation of transcription, DNA-templated|transcription from RNA polymerase II promoter|negative regulation of cell proliferation|negative regulation of gene expression|negative regulation of aldosterone biosynthetic process|cellular response to drug|positive …	core promoter sequence-specific DNA binding|core promoter binding|RNA polymerase II core promoter proximal region sequence-specific DNA binding transcription factor activity involved in negative regulation of transcription|chromatin binding|sequence-specific DNA binding transcription factor activity|protein binding|transcription factor binding|outward rectifier potassium channel activity|transcri…	10	-2.5	1.91	10	-4.7	21.9	-4.6	-9	-3.4	21.8	0.00857	0
2939	GSTA2	glutathione S-transferase alpha 2	cytosol|	glutathione metabolic process|xenobiotic metabolic process|epithelial cell differentiation|small molecule metabolic process|glutathione derivative biosynthetic process|	glutathione transferase activity|	5	-4.1	21.9	5	-1.2	3.21	-4.1	-8	-1.8	21.7	0.00889	0
51493	RTCB	RNA 2',3'-cyclic phosphate and 5'-OH ligase	cytoplasm|tRNA-splicing ligase complex|	in utero embryonic development|placenta development|tRNA splicing, via endonucleolytic cleavage and ligation|	RNA ligase (ATP) activity|ATP binding|vinculin binding|poly(A) RNA binding|metal ion binding|	5	2.6	6.2	5	2.3	16.1	2.5	1.4	4.2	21.7	0.00889	0
91404	SESTD1	SEC14 and spectrin domains 1	calcium channel complex|	None	protein binding|phosphatidylinositol-4,5-bisphosphate binding|phosphatidylinositol-5-phosphate binding|phosphatidylinositol-3-phosphate binding|phosphatidylinositol-3,4-bisphosphate binding|phosphatidylinositol-4-phosphate binding|phosphatidic acid binding|phosphatidylinositol-3,5-bisphosphate binding|	5	-4	24.2	5	2.3	3.72	-3.9	-7.7	-2.8	21.7	0.00889	0
10055	SAE1	SUMO1 activating enzyme subunit 1	nucleus|nucleus|nucleoplasm|cytosol|intracellular membrane-bounded organelle|	regulation of mitotic cell cycle|protein ubiquitination|protein sumoylation|protein sumoylation|protein sumoylation|SMT3-dependent protein catabolic process|positive regulation of catalytic activity|post-translational protein modification|cellular protein metabolic process|	ubiquitin activating enzyme activity|protein binding|protein C-terminus binding|enzyme activator activity|SUMO activating enzyme activity|ATP-dependent protein binding|protein heterodimerization activity|protein heterodimerization activity|	5	-2.8	5.29	5	-4	17.7	-3.9	-7.4	-2.6	21.6	0.00923	0
6602	SMARCD1	SWI/SNF related, matrix associated, actin dependent regulator of chromatin, subfamily d, member 1	SWI/SNF complex|npBAF complex|nBAF complex|	nucleosome disassembly|chromatin remodeling|chromatin remodeling|regulation of transcription from RNA polymerase II promoter|nervous system development|chromatin-mediated maintenance of transcription|	transcription coactivator activity|protein binding|protein complex scaffold|	5	-1.1	4.62	5	-2.4	19.7	-2.3	-4.3	-1.5	21.6	0.00923	0
59067	IL21	interleukin 21	extracellular space|	positive regulation of natural killer cell cytokine production|immune response|signal transduction|positive regulation of cell proliferation|positive regulation of B cell proliferation|positive regulation of interleukin-10 production|positive regulation of interleukin-17 production|positive regulation of natural killer cell differentiation|positive regulation of tissue remodeling|positive regulat…	cytokine activity|cytokine receptor binding|interleukin-2 receptor binding|	5	1.1	3.05	5	-4.8	24.2	-4.8	-9	-4	21.5	0.00957	0
619373	MBOAT4	membrane bound O-acyltransferase domain containing 4	endoplasmic reticulum membrane|integral component of endoplasmic reticulum membrane|	peptidyl-serine octanoylation|cellular protein metabolic process|	serine O-acyltransferase activity|	4	-4.9	23.7	3	0.7	2.38	-4.9	-9	-4.1	21.5	0.00957	0
55658	RNF126	ring finger protein 126	nucleus|cytoplasm|	metabolic process|	protein binding|zinc ion binding|ligase activity|	5	1.4	7.29	5	2.5	16.2	2.3	1.4	4.1	21.4	0.00996	0
11198	SUPT16H	suppressor of Ty 16 homolog (S. cerevisiae)	nucleus|nucleoplasm|chromosome|	DNA replication|DNA repair|nucleosome disassembly|transcription from RNA polymerase II promoter|transcription elongation from RNA polymerase II promoter|gene expression|viral process|positive regulation of DNA-templated transcription, elongation|positive regulation of viral transcription|	protein binding|poly(A) RNA binding|	5	-1.3	4.44	5	-1.2	17.3	-1.3	-2.4	-0.8	21.4	0.00996	0
10849	CD3EAP	CD3e molecule, epsilon associated protein	RNA polymerase I transcription factor complex|nucleus|chromosome|nucleolus|DNA-directed RNA polymerase I complex|cytoplasm|mitochondrion|	transmembrane receptor protein tyrosine kinase signaling pathway|rRNA transcription|	DNA-directed RNA polymerase activity|poly(A) RNA binding|	5	-1.4	5.81	5	-1.9	16.5	-1.8	-3.3	-1.2	21.3	0.0104	0
1207	CLNS1A	chloride channel, nucleotide-sensitive, 1A	nucleus|cytoplasm|cytosol|cytosol|cytoskeleton|plasma membrane|methylosome|pICln-Sm protein complex|	spliceosomal snRNP assembly|spliceosomal snRNP assembly|chloride transport|cell volume homeostasis|gene expression|RNA metabolic process|ncRNA metabolic process|	protein binding|poly(A) RNA binding|	5	-1.5	2.81	5	-3.4	20.9	-3.3	-6.2	-1.9	21.3	0.0104	0
541578	CXORF40B	chromosome X open reading frame 40B	None	None	None	5	-1.1	1.93	5	-5.5	23	-5.5	-10.9	-4.8	21.3	0.0104	0
117178	SSX2IP	synovial sarcoma, X breakpoint 2 interacting protein	nucleus|cell-cell adherens junction|cell leading edge|centriolar satellite|protein complex|	cell adhesion|regulation of Rac protein signal transduction|centrosome organization|regulation of cell motility|	protein binding|protein domain specific binding|	5	-3.2	8.99	5	-3.2	12.7	-3.2	-5.8	-2.6	21.3	0.0104	0
5718	PSMD12	proteasome (prosome, macropain) 26S subunit, non-ATPase, 12	nucleoplasm|cytosol|proteasome regulatory particle|membrane|proteasome accessory complex|extracellular vesicular exosome|	G1/S transition of mitotic cell cycle|protein polyubiquitination|mitotic cell cycle|antigen processing and presentation of peptide antigen via MHC class I|antigen processing and presentation of exogenous peptide antigen via MHC class I, TAP-dependent|regulation of cellular amino acid metabolic process|apoptotic process|DNA damage response, signal transduction by p53 class mediator resulting in ce…	None	5	-1.8	4.66	5	-2.1	17.2	-2	-3.5	-1.2	21.2	0.0109	0
285141	ERICH2	glutamate-rich 2	None	None	None	5	-4	16.7	5	-2.6	5.75	-3.9	-7.8	-2.8	21.1	0.0114	0
8425	LTBP4	latent transforming growth factor beta binding protein 4	extracellular region|proteinaceous extracellular matrix|extracellular space|extracellular matrix|extracellular matrix|extracellular vesicular exosome|	regulation of cell growth|protein folding|transforming growth factor beta receptor signaling pathway|multicellular organismal development|regulation of transforming growth factor beta receptor signaling pathway|regulation of proteolysis|extracellular matrix organization|growth hormone secretion|regulation of cell differentiation|	transforming growth factor beta-activated receptor activity|integrin binding|calcium ion binding|protein binding|glycosaminoglycan binding|transforming growth factor beta binding|transforming growth factor beta binding|	10	-4.1	19.2	10	-2.6	3.45	-4	-7.9	-2.9	21.1	0.0114	0
65217	PCDH15	protocadherin-related 15	photoreceptor outer segment|extracellular space|plasma membrane|integral component of membrane|stereocilium|synapse|extracellular vesicular exosome|	homophilic cell adhesion|sensory perception of sound|photoreceptor cell maintenance|sensory perception of light stimulus|equilibrioception|	calcium ion binding|	5	0.3	0.425	5	4.6	23.5	4.6	3.7	9	21.1	0.0114	0
83860	TAF3	TAF3 RNA polymerase II, TATA box binding protein (TBP)-associated factor, 140kDa	nucleus|transcription factor TFIID complex|	negative regulation of transcription from RNA polymerase II promoter|transcription, DNA-templated|negative regulation of sequence-specific DNA binding transcription factor activity|maintenance of protein location in nucleus|	p53 binding|protein binding|zinc ion binding|	5	-3.2	17	5	-1.7	6.66	-3	-5.1	-1.8	21.1	0.0114	0
2547	XRCC6	X-ray repair complementing defective repair in Chinese hamster cells 6	nuclear telomere cap complex|nucleus|nucleoplasm|transcription factor complex|nucleolus|cytosol|membrane|Ku70:Ku80 complex|nonhomologous end joining complex|	telomere maintenance|DNA ligation|DNA repair|double-strand break repair|double-strand break repair via nonhomologous end joining|double-strand break repair via nonhomologous end joining|transcription, DNA-templated|brain development|viral process|positive regulation of type I interferon production|DNA duplex unwinding|DNA duplex unwinding|V(D)J recombination|innate immune response|negative regula…	DNA binding|damaged DNA binding|double-stranded DNA binding|double-stranded telomeric DNA binding|ATP-dependent DNA helicase activity|protein binding|ATP binding|protein C-terminus binding|transcription regulatory region DNA binding|poly(A) RNA binding|5'-deoxyribose-5-phosphate lyase activity|	5	-1.8	7.92	5	-2.9	15.1	-2.8	-5.2	-1.8	21.1	0.0114	0
3295	HSD17B4	hydroxysteroid (17-beta) dehydrogenase 4	mitochondrion|peroxisome|peroxisome|peroxisomal membrane|peroxisomal matrix|membrane|intracellular membrane-bounded organelle|	very long-chain fatty acid metabolic process|osteoblast differentiation|fatty acid beta-oxidation|bile acid biosynthetic process|metabolic process|bile acid metabolic process|androgen metabolic process|estrogen metabolic process|fatty acid beta-oxidation using acyl-CoA oxidase|unsaturated fatty acid metabolic process|alpha-linolenic acid metabolic process|very long-chain fatty-acyl-CoA metabolic …	3-hydroxyacyl-CoA dehydrogenase activity|3-hydroxyacyl-CoA dehydrogenase activity|3-hydroxyacyl-CoA dehydrogenase activity|receptor binding|long-chain-enoyl-CoA hydratase activity|long-chain-enoyl-CoA hydratase activity|isomerase activity|3alpha,7alpha,12alpha-trihydroxy-5beta-cholest-24-enoyl-CoA hydratase activity|protein homodimerization activity|17-beta-hydroxysteroid dehydrogenase (NAD+) act…	5	-4.4	23.2	5	-0.5	1.06	-4.4	-8	-3.2	21	0.012	0
9054	NFS1	NFS1 cysteine desulfurase	nucleus|cytoplasm|mitochondrion|mitochondrial matrix|mitochondrial matrix|cytosol|cytosol|	sulfur amino acid metabolic process|protein complex assembly|cysteine metabolic process|vitamin metabolic process|water-soluble vitamin metabolic process|Mo-molybdopterin cofactor biosynthetic process|iron incorporation into metallo-sulfur cluster|molybdopterin cofactor biosynthetic process|small molecule metabolic process|	protein binding|pyridoxal phosphate binding|cysteine desulfurase activity|cysteine desulfurase activity|cysteine desulfurase activity|protein homodimerization activity|	5	-2.8	12.1	5	-2.1	10.3	-2.6	-4.7	-1.8	20.9	0.0127	0
8602	NOP14	NOP14 nucleolar protein	nucleus|nucleolus|nucleolus|mitochondrion|membrane|90S preribosome|Noc4p-Nop14p complex|small-subunit processome|	endonucleolytic cleavage in ITS1 to separate SSU-rRNA from 5.8S rRNA and LSU-rRNA from tricistronic rRNA transcript (SSU-rRNA, 5.8S rRNA, LSU-rRNA)|maturation of SSU-rRNA from tricistronic rRNA transcript (SSU-rRNA, 5.8S rRNA, LSU-rRNA)|endonucleolytic cleavage to generate mature 5'-end of SSU-rRNA from (SSU-rRNA, 5.8S rRNA, LSU-rRNA)|endonucleolytic cleavage in 5'-ETS of tricistronic rRNA transc…	enzyme binding|snoRNA binding|poly(A) RNA binding|	5	-3.1	7.92	5	-3.9	14.1	-3.7	-7.1	-2.6	20.9	0.0127	0
5693	PSMB5	proteasome (prosome, macropain) subunit, beta type, 5	proteasome complex|nucleus|nucleoplasm|cytosol|proteasome core complex|extracellular vesicular exosome|	G1/S transition of mitotic cell cycle|protein polyubiquitination|mitotic cell cycle|antigen processing and presentation of peptide antigen via MHC class I|antigen processing and presentation of exogenous peptide antigen via MHC class I, TAP-dependent|regulation of cellular amino acid metabolic process|apoptotic process|DNA damage response, signal transduction by p53 class mediator resulting in ce…	threonine-type endopeptidase activity|protein binding|	5	-2.8	7.32	4	-3	14	-2.9	-5.4	-2	20.9	0.0127	0
147841	SPC24	SPC24, NDC80 kinetochore complex component	condensed chromosome kinetochore|nucleus|nucleolus|cytosol|Ndc80 complex|	mitotic cell cycle|mitotic nuclear division|	protein binding|	5	-1.5	2.54	5	-2.6	19.9	-2.5	-4.6	-1.8	20.9	0.0127	0
51593	SRRT	serrate, RNA effector molecule	nucleoplasm|cytoplasm|	transcription, DNA-templated|regulation of transcription, DNA-templated|cell proliferation|primary miRNA processing|response to arsenic-containing substance|neuronal stem cell maintenance|	DNA binding|protein binding|poly(A) RNA binding|	5	-1.6	7.77	5	-2.4	14.6	-2.3	-3.9	-1.1	20.8	0.0134	0
10376	TUBA1B	tubulin, alpha 1b	microtubule|microtubule|cytoplasmic microtubule|extracellular vesicular exosome|	microtubule cytoskeleton organization|GTP catabolic process|protein folding|microtubule-based process|cytoskeleton-dependent intracellular transport|cellular protein metabolic process|'de novo' posttranslational protein folding|protein polymerization|cell division|cellular response to interleukin-4|	double-stranded RNA binding|GTPase activity|structural molecule activity|structural constituent of cytoskeleton|protein binding|GTP binding|	5	-2.7	14.3	5	-1.4	9.11	-2.4	-4.1	-1.3	20.8	0.0134	0
4267	CD99	CD99 molecule	cytoplasm|plasma membrane|integral component of plasma membrane|	cell adhesion|	None	5	-2.4	12.7	5	-2.9	8.99	-2.7	-5.1	-1.9	20.7	0.0142	0
55795	PCID2	PCI domain containing 2	cellular_component|	negative regulation of apoptotic process|regulation of mRNA stability|positive regulation of B cell differentiation|positive regulation of transcription, DNA-templated|spleen development|positive regulation of mitotic cell cycle spindle assembly checkpoint|negative regulation of cysteine-type endopeptidase activity|	None	10	-3.5	9.23	10	-1.4	13.4	-1.4	-3.6	-0.6	20.7	0.0142	0
144809	FAM216B	family with sequence similarity 216, member B	None	None	None	5	-4.4	23.4	5	0	0	-4.4	-8	-3.4	20.6	0.0152	0
22944	KIN	Kin17 DNA and RNA binding protein	nucleus|cytoplasm|nuclear matrix|	DNA replication|DNA repair|DNA recombination|mRNA processing|cellular response to DNA damage stimulus|viral process|	DNA binding|double-stranded DNA binding|RNA binding|metal ion binding|	5	-3.8	17.9	5	-2.4	4.06	-3.8	-6.8	-2.5	20.6	0.0152	0
51003	MED31	mediator complex subunit 31	nucleoplasm|mediator complex|	regulation of transcription from RNA polymerase II promoter|transcription initiation from RNA polymerase II promoter|protein complex assembly|gene expression|negative regulation of fibroblast proliferation|limb development|	RNA polymerase II transcription cofactor activity|protein binding|protein complex binding|	5	-2.8	4.04	5	-3.9	17.9	-3.8	-7.4	-2.6	20.6	0.0152	0
5426	POLE	polymerase (DNA directed), epsilon, catalytic subunit	nucleus|nucleoplasm|cytoplasm|plasma membrane|epsilon DNA polymerase complex|	G1/S transition of mitotic cell cycle|G1/S transition of mitotic cell cycle|mitotic cell cycle|telomere maintenance via recombination|telomere maintenance|DNA synthesis involved in DNA repair|in utero embryonic development|DNA replication|DNA replication initiation|DNA repair|transcription-coupled nucleotide-excision repair|base-excision repair, gap-filling|nucleotide-excision repair|nucleotide-e…	nucleotide binding|DNA binding|chromatin binding|DNA-directed DNA polymerase activity|zinc ion binding|4 iron, 4 sulfur cluster binding|	5	-1.7	11	5	-1.9	10.1	-1.8	-3.2	-1.1	20.6	0.0152	0
7316	UBC	ubiquitin C	nucleoplasm|cytosol|plasma membrane|endosome membrane|endocytic vesicle membrane|	G1/S transition of mitotic cell cycle|G2/M transition of mitotic cell cycle|negative regulation of transcription from RNA polymerase II promoter|activation of MAPK activity|protein polyubiquitination|mitotic cell cycle|toll-like receptor signaling pathway|antigen processing and presentation of peptide antigen via MHC class I|antigen processing and presentation of exogenous peptide antigen via MHC…	protease binding|protein binding|poly(A) RNA binding|	5	-4.7	23.3	5	0	0	-4.7	-9	-3.8	20.6	0.0152	0
221504	ZBTB9	zinc finger and BTB domain containing 9	nucleus|	transcription, DNA-templated|regulation of transcription, DNA-templated|	DNA binding|metal ion binding|	5	3.7	5.08	5	3.3	16.1	3.5	2.8	6.8	20.6	0.0152	0
47	ACLY	ATP citrate lyase	nucleus|cytoplasm|mitochondrion|cytosol|plasma membrane|citrate lyase complex|membrane|extracellular vesicular exosome|	citrate metabolic process|energy reserve metabolic process|ATP catabolic process|lipid biosynthetic process|coenzyme A metabolic process|triglyceride biosynthetic process|positive regulation of cellular metabolic process|long-chain fatty-acyl-CoA biosynthetic process|cellular lipid metabolic process|cellular carbohydrate metabolic process|small molecule metabolic process|	ATP citrate synthase activity|succinate-CoA ligase (ADP-forming) activity|protein binding|ATP binding|metal ion binding|cofactor binding|	5	3.7	14.2	5	1.4	10.6	3.4	1.2	5.6	20.5	0.0164	0
55677	IWS1	IWS1 homolog (S. cerevisiae)	nucleus|nucleolus|cytoplasm|	transcription, DNA-templated|regulation of transcription, DNA-templated|mRNA processing|RNA splicing|regulation of mRNA export from nucleus|regulation of mRNA processing|mRNA transport|regulation of histone H4 acetylation|regulation of histone H3-K36 trimethylation|	DNA binding|protein binding|	5	2.5	3.33	5	-1.5	18.6	-1.6	-3.4	-1.1	20.5	0.0164	0
6201	RPS7	ribosomal protein S7	nucleus|nucleolus|cytoplasm|microtubule organizing center|cytosol|ribosome|membrane|cytosolic small ribosomal subunit|cytosolic small ribosomal subunit|ribonucleoprotein complex|90S preribosome|small-subunit processome|extracellular vesicular exosome|	nuclear-transcribed mRNA catabolic process, nonsense-mediated decay|cytoplasmic translation|rRNA processing|translation|translation|translation|translational initiation|translational elongation|translational termination|SRP-dependent cotranslational protein targeting to membrane|gene expression|viral process|RNA metabolic process|mRNA metabolic process|viral life cycle|viral transcription|ribosom…	RNA binding|structural constituent of ribosome|protein binding|poly(A) RNA binding|	4	-3.5	11	5	-2	12.4	-3.4	-5.7	-1.6	20.5	0.0164	0
23318	ZCCHC11	zinc finger, CCHC domain containing 11	extracellular space|nucleolus|cytoplasm|extracellular vesicular exosome|	cytokine production|miRNA metabolic process|miRNA catabolic process|stem cell maintenance|pre-miRNA processing|RNA 3'-end processing|regulation of lipopolysaccharide-mediated signaling pathway|negative regulation of NF-kappaB transcription factor activity|positive regulation of interleukin-6 production|interleukin-6-mediated signaling pathway|	protein binding|zinc ion binding|poly(A) RNA binding|RNA uridylyltransferase activity|	5	2.5	12.3	5	1.3	10.2	1.5	1	3.7	20.5	0.0164	0
388551	CEACAM16	carcinoembryonic antigen-related cell adhesion molecule 16	extracellular region|stereocilium bundle tip|	sensory perception of sound|	None	10	-4.1	23.3	10	-0.6	1.22	-4	-8	-1	20.4	0.0178	0
127281	FAM213B	family with sequence similarity 213, member B	cytoplasm|endoplasmic reticulum|cytosol|myelin sheath|extracellular vesicular exosome|	prostaglandin biosynthetic process|arachidonic acid metabolic process|cyclooxygenase pathway|small molecule metabolic process|oxidation-reduction process|	oxidoreductase activity, acting on the CH-OH group of donors, NAD or NADP as acceptor|prostaglandin-F synthase activity|	5	-4.5	23.2	5	0.6	0.366	-4.5	-9	-3.7	20.4	0.0178	0
60488	MRPS35	mitochondrial ribosomal protein S35	cytoplasm|mitochondrion|mitochondrial small ribosomal subunit|mitochondrial small ribosomal subunit|	DNA damage response, detection of DNA damage|peptide biosynthetic process|	poly(A) RNA binding|	5	-2.1	5.85	5	-1.4	15.7	-1.5	-3.1	-0.9	20.4	0.0178	0
2117	ETV3	ets variant 3	nucleus|transcriptional repressor complex|	negative regulation of transcription from RNA polymerase II promoter|regulation of transcription from RNA polymerase II promoter|transcription from RNA polymerase II promoter|biological_process|cell differentiation|	sequence-specific DNA binding RNA polymerase II transcription factor activity|molecular_function|sequence-specific DNA binding|	5	-3.9	17.9	5	-2.3	4.21	-3.9	-7.7	-2.2	20.3	0.0192	0
84824	FCRLA	Fc receptor-like A	extracellular region|cytoplasm|	cell differentiation|	None	5	-4.2	23.1	5	0.2	0.115	-4.2	-8	-3.3	20.3	0.0192	0
5514	PPP1R10	protein phosphatase 1, regulatory subunit 10	chromatin|nucleus|PTW/PP1 phosphatase complex|	transcription, DNA-templated|protein import into nucleus|negative regulation of catalytic activity|	DNA binding|protein phosphatase inhibitor activity|poly(A) RNA binding|metal ion binding|	5	-1.9	4.52	5	-1.4	16.6	-1.6	-3.1	-1	20.3	0.0192	0
10576	CCT2	chaperonin containing TCP1, subunit 2 (beta)	zona pellucida receptor complex|cytosol|cytosol|chaperonin-containing T-complex|microtubule|cell body|extracellular vesicular exosome|	protein folding|protein folding|binding of sperm to zona pellucida|cellular protein metabolic process|'de novo' posttranslational protein folding|chaperone-mediated protein complex assembly|	protein binding|ATP binding|unfolded protein binding|	5	-2.3	4.39	5	-1.5	17.3	-1.6	-3.5	-1.2	20.2	0.0205	0
10898	CPSF4	cleavage and polyadenylation specific factor 4, 30kDa	nucleoplasm|mRNA cleavage and polyadenylation specificity factor complex|	mRNA processing|modulation by virus of host morphology or physiology|modulation by virus of host process|viral life cycle|modification by virus of host mRNA processing|	zinc ion binding|poly(A) RNA binding|	5	-3.7	7.71	5	-4	13	-3.9	-7.8	-3.4	20.2	0.0205	0
1665	DHX15	DEAH (Asp-Glu-Ala-His) box helicase 15	nucleus|U12-type spliceosomal complex|nucleolus|U2-type post-mRNA release spliceosomal complex|	ATP catabolic process|mRNA processing|RNA splicing|	RNA helicase activity|double-stranded RNA binding|protein binding|ATP binding|ATP-dependent helicase activity|poly(A) RNA binding|	5	1.3	3.57	5	-3.1	22.9	-3.1	-5.9	-2.5	20.2	0.0205	0
2962	GTF2F1	general transcription factor IIF, polypeptide 1, 74kDa	nucleus|nucleoplasm|transcription factor TFIIF complex|cell junction|	mRNA splicing, via spliceosome|transcription from RNA polymerase II promoter|transcription initiation from RNA polymerase II promoter|transcription elongation from RNA polymerase II promoter|7-methylguanosine mRNA capping|RNA splicing|response to virus|gene expression|viral process|positive regulation of catalytic activity|positive regulation of transcription from RNA polymerase II promoter|posit…	DNA binding|transcription coactivator activity|catalytic activity|protein binding|transcription factor binding|phosphatase activator activity|poly(A) RNA binding|	5	-1.2	1.83	5	-2.6	20.2	-2.6	-4.7	-1.9	20.2	0.0205	0
100303755	PET117	PET117 homolog (S. cerevisiae)	mitochondrion|	None	None	5	-2.7	16.6	5	-1.3	6.01	-2	-4	-1	20.2	0.0205	0
6432	SRSF7	serine/arginine-rich splicing factor 7	nucleus|nucleoplasm|cytoplasm|extracellular vesicular exosome|	mRNA splicing, via spliceosome|transcription from RNA polymerase II promoter|termination of RNA polymerase II transcription|mRNA processing|mRNA export from nucleus|RNA splicing|gene expression|mRNA 3'-end processing|negative regulation of mRNA splicing, via spliceosome|	nucleotide binding|protein binding|zinc ion binding|poly(A) RNA binding|	5	-1.6	5.25	5	-1.6	15.3	-1.6	-2.7	-0.9	20.2	0.0205	0
115123	MARCH3	membrane-associated ring finger (C3HC4) 3, E3 ubiquitin protein ligase	lysosome|endosome|integral component of membrane|cytoplasmic vesicle membrane|early endosome membrane|	endocytosis|protein ubiquitination|	zinc ion binding|ligase activity|	5	-4	15	5	-3	6.13	-3.9	-7.6	-2.8	20.1	0.0215	0
115908	CTHRC1	collagen triple helix repeat containing 1	proteinaceous extracellular matrix|collagen trimer|extracellular space|cytoplasm|	cell migration|positive regulation of protein binding|positive regulation of osteoblast proliferation|ossification involved in bone remodeling|positive regulation of osteoblast differentiation|Wnt signaling pathway, planar cell polarity pathway|inner ear receptor stereocilium organization|negative regulation of canonical Wnt signaling pathway|cochlea morphogenesis|establishment of planar polarity…	frizzled binding|Wnt-protein binding|	5	-4.1	22	5	-0.8	0.632	-4.1	-8	-2	20	0.0224	0
23354	HAUS5	HAUS augmin-like complex, subunit 5	cytoplasm|centrosome|spindle|microtubule|HAUS complex|	mitotic nuclear division|spindle assembly|centrosome organization|	molecular_function|	5	-2.7	12.3	5	-1.7	9.44	-2	-3.9	-1	20	0.0224	0
MKI67IP	MKI67IP	N/A	None	None	None	5	-3.3	9.88	5	-2.4	11.5	-3.2	-5.9	-1.9	20	0.0224	0
4706	NDUFAB1	NADH dehydrogenase (ubiquinone) 1, alpha/beta subcomplex, 1, 8kDa	mitochondrial inner membrane|mitochondrial respiratory chain complex I|mitochondrial respiratory chain complex I|mitochondrial respiratory chain complex I|mitochondrial matrix|mitochondrial membrane|mitochondrial membrane|	mitochondrial electron transport, NADH to ubiquinone|fatty acid biosynthetic process|protein lipoylation|respiratory electron transport chain|cellular metabolic process|small molecule metabolic process|	ACP phosphopantetheine attachment site binding involved in fatty acid biosynthetic process|fatty acid binding|calcium ion binding|NADH dehydrogenase (ubiquinone) activity|	5	-1.6	8.59	5	-1.5	11.7	-1.5	-2.7	-1	19.9	0.0232	0
55660	PRPF40A	PRP40 pre-mRNA processing factor 40 homolog A (S. cerevisiae)	nucleus|cytoplasm|membrane|nuclear matrix|nuclear speck|	mRNA processing|cytoskeleton organization|cell cycle|regulation of cell shape|RNA splicing|cell migration|regulation of cytokinesis|cell division|	protein binding|poly(A) RNA binding|proline-rich region binding|	5	1.6	12.7	5	1.2	8.03	1.4	0.9	2.9	19.9	0.0232	0
5708	PSMD2	proteasome (prosome, macropain) 26S subunit, non-ATPase, 2	proteasome complex|nucleoplasm|cytosol|proteasome regulatory particle|membrane|proteasome accessory complex|extracellular vesicular exosome|	G1/S transition of mitotic cell cycle|protein polyubiquitination|mitotic cell cycle|antigen processing and presentation of peptide antigen via MHC class I|antigen processing and presentation of exogenous peptide antigen via MHC class I, TAP-dependent|regulation of cellular amino acid metabolic process|apoptotic process|DNA damage response, signal transduction by p53 class mediator resulting in ce…	protein binding|enzyme regulator activity|	5	-1.5	2.78	5	-1.6	17.5	-1.5	-2.8	-1.1	19.9	0.0232	0
9238	TBRG4	transforming growth factor beta regulator 4	mitochondrion|	mitotic G1 phase|protein phosphorylation|cell cycle arrest|positive regulation of cell proliferation|cellular respiration|	protein kinase activity|poly(A) RNA binding|	5	-3.1	9.74	5	-3.3	10.7	-3.2	-5.6	-2.4	19.9	0.0232	0
51650	MRPS33	mitochondrial ribosomal protein S33	mitochondrial small ribosomal subunit|	translation|	structural constituent of ribosome|	5	-1.6	13.9	5	-3.6	10	-3.4	-5.2	-0.9	19.8	0.0238	0
9978	RBX1	ring-box 1, E3 ubiquitin protein ligase	nucleoplasm|cytosol|cytosol|SCF ubiquitin ligase complex|SCF ubiquitin ligase complex|VCB complex|cullin-RING ubiquitin ligase complex|Cul2-RING ubiquitin ligase complex|Cul3-RING ubiquitin ligase complex|Cul4A-RING E3 ubiquitin ligase complex|Cul4B-RING E3 ubiquitin ligase complex|Cul5-RING ubiquitin ligase complex|Cul7-RING ubiquitin ligase complex|	DNA repair|protein monoubiquitination|Notch signaling pathway|viral process|protein ubiquitination|SCF-dependent proteasomal ubiquitin-dependent protein catabolic process|SCF-dependent proteasomal ubiquitin-dependent protein catabolic process|proteasome-mediated ubiquitin-dependent protein catabolic process|protein neddylation|regulation of transcription from RNA polymerase II promoter in respons…	ubiquitin-protein transferase activity|ubiquitin-protein transferase activity|protein binding|zinc ion binding|NEDD8 ligase activity|ubiquitin protein ligase binding|protein complex binding|	5	-3	7.64	5	-3.2	12.7	-3.1	-5.7	-2.4	19.8	0.0238	0
55299	BRIX1	BRX1, biogenesis of ribosomes, homolog (S. cerevisiae)	nucleus|nucleolus|	ribosome biogenesis|	poly(A) RNA binding|	5	-2.5	9.52	5	-2	11.3	-2.2	-4.2	-1.6	19.7	0.0243	0
4331	MNAT1	MNAT CDK-activating kinase assembly factor 1	nucleus|nucleoplasm|holo TFIIH complex|cytoplasm|	regulation of cyclin-dependent protein serine/threonine kinase activity|G1/S transition of mitotic cell cycle|G2/M transition of mitotic cell cycle|mitotic cell cycle|nucleotide-excision repair, DNA damage removal|ATP catabolic process|DNA repair|transcription-coupled nucleotide-excision repair|nucleotide-excision repair|regulation of transcription from RNA polymerase II promoter|transcription fr…	protein binding|DNA-dependent ATPase activity|zinc ion binding|RNA polymerase II carboxy-terminal domain kinase activity|protein N-terminus binding|	5	-1.5	1.96	5	-3	19.5	-3	-5.3	-1	19.7	0.0243	0
167465	ZNF366	zinc finger protein 366	nucleus|	negative regulation of transcription from RNA polymerase II promoter|transcription, DNA-templated|negative regulation of intracellular estrogen receptor signaling pathway|response to estrogen|	DNA binding|transcription corepressor activity|protein binding|estrogen receptor binding|metal ion binding|	5	0.6	1.15	5	-4.2	22.3	-4.2	-8	-3.5	19.7	0.0243	0
8161	COIL	coilin	female germ cell nucleus|nucleus|nucleoplasm|nucleolus|cytoplasm|Cajal body|membrane|	oxidation-reduction process|	protein binding|protein C-terminus binding|disulfide oxidoreductase activity|identical protein binding|	5	-2.1	19.3	5	-0.8	2.44	-2	-3.5	-1.1	19.6	0.0247	0
9537	TP53I11	tumor protein p53 inducible protein 11	integral component of membrane|	response to stress|negative regulation of cell proliferation|	None	5	-3.7	7.75	5	-3.2	12.6	-3.7	-6.7	-2.8	19.6	0.0247	0
5704	PSMC4	proteasome (prosome, macropain) 26S subunit, ATPase, 4	proteasome complex|nucleus|nucleoplasm|cytoplasm|cytosol|membrane|inclusion body|proteasome accessory complex|cytosolic proteasome complex|	G1/S transition of mitotic cell cycle|protein polyubiquitination|mitotic cell cycle|blastocyst development|antigen processing and presentation of peptide antigen via MHC class I|antigen processing and presentation of exogenous peptide antigen via MHC class I, TAP-dependent|ATP catabolic process|proteolysis|regulation of cellular amino acid metabolic process|apoptotic process|DNA damage response, …	protein binding|ATP binding|ATPase activity|	5	-2.5	11.8	4	-1.5	9.3	-1.9	-4.1	-1.2	19.5	0.025	0
10393	ANAPC10	anaphase promoting complex subunit 10	nucleoplasm|anaphase-promoting complex|anaphase-promoting complex|cytosol|	G2/M transition of mitotic cell cycle|mitotic anaphase|mitotic cell cycle|ubiquitin-dependent protein catabolic process|mitotic nuclear division|mitotic spindle assembly checkpoint|anaphase-promoting complex-dependent proteasomal ubiquitin-dependent protein catabolic process|negative regulation of ubiquitin-protein ligase activity involved in mitotic cell cycle|positive regulation of ubiquitin-pr…	ubiquitin-protein transferase activity|	5	-1.7	8.62	5	-1.8	11.2	-1.8	-3.3	-1.2	19.4	0.0252	0
705	BYSL	bystin-like	nucleus|nucleolus|cytoplasm|membrane|intracellular membrane-bounded organelle|apical part of cell|	maturation of SSU-rRNA from tricistronic rRNA transcript (SSU-rRNA, 5.8S rRNA, LSU-rRNA)|trophectodermal cell differentiation|cell adhesion|female pregnancy|cell proliferation|	protein binding|poly(A) RNA binding|	5	-3.4	12.1	5	-3.5	7.77	-3.5	-6.2	-2.5	19.4	0.0252	0
389084	C2ORF82	chromosome 2 open reading frame 82	integral component of membrane|	None	None	10	-4.2	22.5	10	-0.6	0.498	-4.2	-8	-0.9	19.4	0.0252	0
3017	HIST1H2BD	histone cluster 1, H2bd	nucleosome|nucleus|nucleoplasm|extracellular vesicular exosome|	chromatin organization|nucleosome assembly|	molecular_function|DNA binding|protein heterodimerization activity|	5	0	0	5	-4.2	22.2	-4.2	-8	-3.3	19.4	0.0252	0
3945	LDHB	lactate dehydrogenase B	cytoplasm|cytoplasm|mitochondrion|cytosol|membrane|extracellular vesicular exosome|	lactate metabolic process|pyruvate metabolic process|glycolytic process|NAD metabolic process|cellular metabolic process|cellular carbohydrate metabolic process|small molecule metabolic process|oxidation-reduction process|	L-lactate dehydrogenase activity|protein binding|kinase binding|identical protein binding|NAD binding|	5	-4	22.2	5	0.3	0.525	-4	-8	-2	19.4	0.0252	0
9909	DENND4B	DENN/MADD domain containing 4B	nucleus|Golgi apparatus|	regulation of Rab protein signal transduction|positive regulation of Rab GTPase activity|	Rab guanyl-nucleotide exchange factor activity|	10	-4.8	22.6	9	-0.2	0.116	-4.8	-9	-3.2	19.3	0.0254	0
8880	FUBP1	far upstream element (FUSE) binding protein 1	nucleus|	regulation of transcription, DNA-templated|transcription from RNA polymerase II promoter|positive regulation of gene expression|	single-stranded DNA binding|sequence-specific DNA binding transcription factor activity|protein binding|poly(A) RNA binding|	5	2.7	14.4	5	1.1	8.62	2.4	1.1	4.2	19.3	0.0254	0
7917	BAG6	BCL2-associated athanogene 6	nucleus|cytosol|BAT3 complex|	kidney development|immune system process|ubiquitin-dependent protein catabolic process|transport|synaptonemal complex assembly|spermatogenesis|brain development|embryo development|chromatin modification|internal peptidyl-lysine acetylation|cell differentiation|lung development|negative regulation of proteasomal ubiquitin-dependent protein catabolic process|regulation of cell proliferation|intrins…	protein binding|Hsp70 protein binding|polyubiquitin binding|ribosome binding|proteasome binding|	5	2.1	8.59	4	1.8	11.2	1.9	1.3	3.5	19.2	0.0256	0
9961	MVP	major vault protein	nucleus|nuclear pore|cytoplasm|cytoskeleton|membrane|ribonucleoprotein complex|perinuclear region of cytoplasm|extracellular vesicular exosome|	cell proliferation|protein transport|negative regulation of signaling|negative regulation of protein autophosphorylation|ERBB signaling pathway|mRNA transport|negative regulation of protein tyrosine kinase activity|protein activation cascade|	protein binding|protein kinase binding|protein phosphatase binding|	5	2.7	12.2	5	1.9	8.32	2.3	1.5	4.3	19.2	0.0256	0
10075	HUWE1	HECT, UBA and WWE domain containing 1, E3 ubiquitin protein ligase	nucleus|nucleus|cytoplasm|membrane|extracellular vesicular exosome|	protein polyubiquitination|base-excision repair|protein monoubiquitination|histone ubiquitination|cell differentiation|protein ubiquitination involved in ubiquitin-dependent protein catabolic process|	DNA binding|ubiquitin-protein transferase activity|protein binding|ligase activity|poly(A) RNA binding|	5	1.8	6.77	5	1.3	13.3	1.4	0.8	2.9	19.1	0.0257	0
10554	AGPAT1	1-acylglycerol-3-phosphate O-acyltransferase 1	endoplasmic reticulum|endoplasmic reticulum membrane|membrane|integral component of membrane|	positive regulation of cytokine production|positive regulation of cytokine-mediated signaling pathway|energy reserve metabolic process|phospholipid metabolic process|phosphatidic acid biosynthetic process|phosphatidic acid biosynthetic process|CDP-diacylglycerol biosynthetic process|triglyceride biosynthetic process|positive regulation of cellular metabolic process|cellular lipid metabolic proces…	1-acylglycerol-3-phosphate O-acyltransferase activity|	10	-1.1	4.2	10	-1.6	15.5	-1.6	-2.4	-0.9	19	0.0258	0
22794	CASC3	cancer susceptibility candidate 3	cytosol|nuclear speck|ribonucleoprotein complex|exon-exon junction complex|perinuclear region of cytoplasm|	nuclear-transcribed mRNA catabolic process, nonsense-mediated decay|mRNA processing|regulation of translation|response to stress|biological_process|intracellular mRNA localization|RNA splicing|gene expression|RNA metabolic process|mRNA metabolic process|mRNA transport|	protein binding|enzyme binding|ubiquitin protein ligase binding|identical protein binding|poly(A) RNA binding|	5	-1.3	6.28	5	-1.3	13.1	-1.3	-2.4	-0.7	19	0.0258	0
1841	DTYMK	deoxythymidylate kinase (thymidylate kinase)	mitochondrial intermembrane space|mitochondrial matrix|cytosol|	dTDP biosynthetic process|dTTP biosynthetic process|cell cycle|cell proliferation|nucleobase-containing small molecule interconversion|response to estrogen|small molecule metabolic process|myoblast differentiation|response to cadmium ion|nucleotide phosphorylation|nucleotide phosphorylation|nucleotide phosphorylation|nucleoside monophosphate phosphorylation|nucleobase-containing small molecule me…	thymidylate kinase activity|ATP binding|nucleoside phosphate kinase activity|	5	-2.3	17.8	5	-1	3.66	-2.2	-4.1	-1.2	19	0.0258	0
124944	C17ORF49	chromosome 17 open reading frame 49	NURF complex|MLL1 complex|	chromatin modification|	DNA binding|chromatin binding|	10	-4.2	22.3	10	0	0	-4.2	-8	-1.9	18.7	0.0261	0
5706	PSMC6	proteasome (prosome, macropain) 26S subunit, ATPase, 6	proteasome complex|nucleus|nucleoplasm|cytosol|membrane|proteasome accessory complex|extracellular vesicular exosome|	G1/S transition of mitotic cell cycle|protein polyubiquitination|mitotic cell cycle|antigen processing and presentation of peptide antigen via MHC class I|antigen processing and presentation of exogenous peptide antigen via MHC class I, TAP-dependent|ATP catabolic process|ubiquitin-dependent protein catabolic process|regulation of cellular amino acid metabolic process|apoptotic process|DNA damage…	protein binding|ATP binding|ATPase activity|protein binding, bridging|	5	-1.6	3.26	5	-2.7	17.1	-2.6	-5	-1.4	18.6	0.0262	0
100526737	RBM14-RBM4	RBM14-RBM4 readthrough	None	None	None	10	-1.2	4.43	10	-2.9	17.5	-1.2	-4.3	-0.8	18.6	0.0262	0
5936	RBM4	RNA binding motif protein 4	nucleus|nucleoplasm|nucleolus|cytoplasm|cytoplasmic stress granule|nuclear speck|	regulation of alternative mRNA splicing, via spliceosome|cap-independent translational initiation|IRES-dependent translational initiation|RNA processing|mRNA processing|RNA splicing|negative regulation of translation|cell differentiation|negative regulation of translation in response to stress|negative regulation of translation involved in gene silencing by miRNA|entrainment of circadian clock by…	nucleotide binding|RNA binding|mRNA binding|mRNA 3'-UTR binding|protein binding|zinc ion binding|miRNA binding|poly(A) RNA binding|pre-mRNA intronic binding|pre-mRNA intronic pyrimidine-rich binding|	10	-1.2	4.43	10	-2.9	17.5	-1.2	-4.3	-0.8	18.6	0.0262	0
23352	UBR4	ubiquitin protein ligase E3 component n-recognin 4	nucleus|cytoplasm|centrosome|membrane|integral component of membrane|	viral process|protein ubiquitination involved in ubiquitin-dependent protein catabolic process|	ubiquitin-protein transferase activity|protein binding|calmodulin binding|zinc ion binding|ligase activity|	5	2.3	7.35	5	1.5	12.6	1.8	0.9	3.6	18.6	0.0262	0
23160	WDR43	WD repeat domain 43	nucleolus|	None	poly(A) RNA binding|	4	-3.8	14	4	-2.8	5.7	-3.8	-6.8	-2.7	18.6	0.0262	0
9781	RNF144A	ring finger protein 144A	Golgi apparatus|integral component of membrane|	protein ubiquitination|	zinc ion binding|ligase activity|	10	0.2	0.21	10	-5	20.5	-4.9	-10	-4.2	18.5	0.0263	0
51729	WBP11	WW domain binding protein 11	nucleus|cytoplasm|nuclear speck|	rRNA processing|mRNA processing|RNA splicing|regulation of catalytic activity|	single-stranded DNA binding|protein binding|protein phosphatase type 1 regulator activity|poly(A) RNA binding|WW domain binding|	10	-2.4	11.5	9	-2.4	7.3	-2.4	-3.9	-1.4	18.4	0.0264	0
317662	FAM149B1	family with sequence similarity 149, member B1	None	None	None	5	2.2	2.69	5	3.1	16.6	2.9	1.9	5.8	18.3	0.0264	0
146802	SLC47A2	solute carrier family 47 (multidrug and toxin extrusion), member 2	plasma membrane|integral component of membrane|	drug transmembrane transport|transmembrane transport|	drug transmembrane transporter activity|antiporter activity|	5	-1.7	8.06	5	-2.7	12.2	-2.5	-4.5	-1.7	18.3	0.0264	0
9519	TBPL1	TBP-like 1	transcription factor TFIIA complex|cytoplasm|	acrosome assembly|dTTP biosynthetic process|DNA-templated transcription, initiation|transcription from RNA polymerase II promoter|spermatid nucleus differentiation|regulation of RNA biosynthetic process|	DNA binding|transcription coactivator activity|	5	1.3	8.99	5	1.3	9.67	1.3	0.8	2.5	18.3	0.0264	0
8914	TIMELESS	timeless circadian clock	nuclear chromatin|nucleus|nucleus|	negative regulation of transcription from RNA polymerase II promoter|morphogenesis of an epithelium|transcription, DNA-templated|cellular response to DNA damage stimulus|mitotic nuclear division|circadian rhythm|detection of abiotic stimulus|response to abiotic stimulus|embryo development|lung development|regulation of circadian rhythm|cell cycle phase transition|negative regulation of transcript…	protein binding|protein homodimerization activity|protein heterodimerization activity|	4	1.6	1.87	5	-1.8	17.9	-1.8	-3.5	-1.1	18.3	0.0264	0
387890	TMEM233	transmembrane protein 233	integral component of membrane|	response to biotic stimulus|	None	5	1.7	5.61	5	3.1	14.8	2.8	1.5	5.8	18.3	0.0264	0
56647	BCCIP	BRCA2 and CDKN1A interacting protein	nucleus|nuclear cyclin-dependent protein kinase holoenzyme complex|	regulation of cyclin-dependent protein serine/threonine kinase activity|DNA repair|cell cycle|neuroendocrine cell differentiation|	protein binding|kinase regulator activity|poly(A) RNA binding|	5	-2.6	9.9	5	-3.6	9.59	-3.5	-6.2	-2.2	18	0.0267	0
8480	RAE1	ribonucleic acid export 1	nucleus|nuclear envelope|nuclear outer membrane|nuclear pore|nucleolus|cytoplasm|cytoskeleton|	mitotic cell cycle|carbohydrate metabolic process|mRNA export from nucleus|mitotic nuclear envelope disassembly|hexose transport|regulation of glucose transport|glucose transport|viral process|cytokine-mediated signaling pathway|small molecule metabolic process|transmembrane transport|cellular response to organic cyclic compound|	RNA binding|microtubule binding|	5	-1.7	10.9	5	-1.5	7.64	-1.6	-2.8	-1	18	0.0267	0
10615	SPAG5	sperm associated antigen 5	kinetochore|condensed chromosome kinetochore|spindle pole|cytoplasm|microtubule organizing center|spindle microtubule|midbody|microtubule plus-end|mitotic spindle|	mitotic sister chromatid segregation|cell cycle|spindle organization|spindle organization|chromosome segregation|phosphatidylinositol-mediated signaling|regulation of attachment of spindle microtubules to kinetochore|	protein binding|	5	-1.5	8.31	5	-1.3	10.2	-1.4	-2.6	-0.9	18	0.0267	0
54881	TEX10	testis expressed 10	nucleolus|cytoplasm|integral component of membrane|nuclear membrane|MLL1 complex|	None	protein binding|	4	-2.4	14	4	-1.3	6.09	-2.3	-4.4	-1.4	18	0.0267	0
521	ATP5I	ATP synthase, H+ transporting, mitochondrial Fo complex, subunit E	mitochondrial proton-transporting ATP synthase complex, coupling factor F(o)|mitochondrion|mitochondrial inner membrane|mitochondrial proton-transporting ATP synthase complex|	ATP catabolic process|respiratory electron transport chain|mitochondrial ATP synthesis coupled proton transport|mitochondrial ATP synthesis coupled proton transport|cellular metabolic process|small molecule metabolic process|	hydrogen ion transmembrane transporter activity|ATPase activity|transmembrane transporter activity|	5	-1.8	9.44	5	-1.8	8.88	-1.8	-3.2	-1	17.9	0.0268	0
7415	VCP	valosin containing protein	proteasome complex|Hrd1p ubiquitin ligase complex|nucleus|nucleus|cytoplasm|endoplasmic reticulum|endoplasmic reticulum membrane|lipid particle|cytosol|site of double-strand break|intracellular membrane-bounded organelle|perinuclear region of cytoplasm|extracellular vesicular exosome|	ATP catabolic process|DNA repair|double-strand break repair|ER to Golgi vesicle-mediated transport|activation of cysteine-type endopeptidase activity involved in apoptotic process|cellular response to DNA damage stimulus|protein ubiquitination|protein ubiquitination|protein N-linked glycosylation via asparagine|translesion synthesis|ER-associated ubiquitin-dependent protein catabolic process|ER-a…	receptor binding|protein binding|ATP binding|lipid binding|ATPase activity|protein phosphatase binding|protein domain specific binding|polyubiquitin binding|protein complex binding|deubiquitinase activator activity|identical protein binding|ADP binding|poly(A) RNA binding|ubiquitin-specific protease binding|	4	-1.6	6.72	4	-1.9	11.8	-1.8	-3.5	-1.2	17.9	0.0268	0
64745	METTL17	methyltransferase like 17	mitochondrion|ribosome|	translation|methylation|	copper ion binding|protein binding|methyltransferase activity|	5	-1	6.42	5	-1.7	12.9	-1.4	-2.7	-0.9	17.7	0.0269	0
10726	NUDC	nudC nuclear distribution protein	nucleoplasm|cytoplasm|cytosol|microtubule|	mitotic cell cycle|mitotic nuclear division|multicellular organismal development|cell proliferation|	None	5	-2.3	12.9	5	-0.9	8.57	-2.1	-3.7	-0.8	17.7	0.0269	0
6167	RPL37	ribosomal protein L37	cytosol|cytosolic large ribosomal subunit|cytosolic large ribosomal subunit|	nuclear-transcribed mRNA catabolic process, nonsense-mediated decay|translation|translation|translational initiation|translational elongation|translational termination|SRP-dependent cotranslational protein targeting to membrane|gene expression|viral process|RNA metabolic process|mRNA metabolic process|viral life cycle|viral transcription|cellular protein metabolic process|	RNA binding|structural constituent of ribosome|structural constituent of ribosome|rRNA binding|metal ion binding|	5	-1.7	2.73	5	-2.9	16.5	-2.8	-5.5	-2.1	17.7	0.0269	0
54931	TRMT10C	tRNA methyltransferase 10 homolog C (S. cerevisiae)	nucleus|mitochondrion|mitochondrial nucleoid|	mitochondrial RNA 5'-end processing|tRNA processing|methylation|	protein binding|methyltransferase activity|poly(A) RNA binding|	5	-1.8	9.81	5	-2	8.41	-1.9	-3.4	-1	17.7	0.0269	0
171017	ZNF384	zinc finger protein 384	nucleus|focal adhesion|	transcription, DNA-templated|nucleocytoplasmic transport|positive regulation of transcription from RNA polymerase II promoter|positive regulation of protein secretion|	SH3 domain binding|sequence-specific DNA binding|metal ion binding|	5	-4	16.9	5	-1.4	3.62	-3.9	-8	-1.7	17.7	0.0269	0
1639	DCTN1	dynactin 1	kinetochore|spindle pole|cytoplasm|centrosome|cytosol|dynactin complex|microtubule|membrane|dynein complex|cell leading edge|	G2/M transition of mitotic cell cycle|mitotic cell cycle|activation of signaling protein activity involved in unfolded protein response|mitotic nuclear division|nervous system development|cell death|microtubule-based transport|antigen processing and presentation of exogenous peptide antigen via MHC class II|endoplasmic reticulum unfolded protein response|cellular protein metabolic process|	motor activity|protein binding|dynein binding|	5	-1.7	14.4	5	-1.2	4.26	-1.6	-2.7	-0.9	17.6	0.027	0
8669	EIF3J	eukaryotic translation initiation factor 3, subunit J	cytosol|eukaryotic translation initiation factor 3 complex|eukaryotic 43S preinitiation complex|eukaryotic 48S preinitiation complex|	formation of translation preinitiation complex|translation|translational initiation|translational initiation|regulation of translational initiation|gene expression|cellular protein metabolic process|	translation initiation factor activity|protein binding|	5	-2.2	11.9	5	-2.1	6.12	-2.1	-3.7	-1.4	17.6	0.027	0
4969	OGN	osteoglycin	extracellular region|proteinaceous extracellular matrix|extracellular space|Golgi lumen|extracellular matrix|lysosomal lumen|	carbohydrate metabolic process|keratan sulfate biosynthetic process|glycosaminoglycan metabolic process|keratan sulfate metabolic process|keratan sulfate catabolic process|small molecule metabolic process|negative regulation of smooth muscle cell proliferation|	protein binding|growth factor activity|	10	-4.4	20.9	10	0.6	0.87	-4.4	-8	-2.8	17.6	0.027	0
347862	PDDC1	Parkinson disease 7 domain containing 1	extracellular vesicular exosome|	biological_process|	molecular_function|	5	3.7	6.1	5	3.4	12	3.6	2.9	6.8	17.6	0.027	0
23534	TNPO3	transportin 3	nucleus|cytoplasm|intracellular membrane-bounded organelle|	splicing factor protein import into nucleus|	receptor activity|protein binding|	5	1.5	6.88	5	1.9	11.4	1.8	1.1	3.3	17.6	0.027	0
9567	GTPBP1	GTP binding protein 1	cytoplasmic exosome (RNase complex)|cytosol|membrane|	GTP catabolic process|immune response|signal transduction|positive regulation of mRNA catabolic process|	GTPase activity|GTP binding|poly(A) RNA binding|	5	1.8	2.55	5	-2.8	19.6	-2.8	-5.5	-1.3	17.5	0.0271	0
5691	PSMB3	proteasome (prosome, macropain) subunit, beta type, 3	proteasome complex|nucleus|nucleoplasm|cytoplasm|mitochondrion|Golgi apparatus|cytosol|proteasome core complex|actin cytoskeleton|extracellular vesicular exosome|	G1/S transition of mitotic cell cycle|protein polyubiquitination|mitotic cell cycle|antigen processing and presentation of peptide antigen via MHC class I|antigen processing and presentation of exogenous peptide antigen via MHC class I, TAP-dependent|regulation of cellular amino acid metabolic process|apoptotic process|DNA damage response, signal transduction by p53 class mediator resulting in ce…	threonine-type endopeptidase activity|protein binding|	5	-2.5	7.78	5	-2.2	10.5	-2.3	-4.4	-1.7	17.5	0.0271	0
54962	TIPIN	TIMELESS interacting protein	nuclear chromatin|nucleus|cytoplasm|Golgi apparatus|intracellular membrane-bounded organelle|	DNA replication checkpoint|mitotic nuclear division|positive regulation of cell proliferation|response to UV|intra-S DNA damage checkpoint|regulation of nuclear cell cycle DNA replication|cell cycle phase transition|replication fork protection|	protein binding|	3	-2	4.96	5	-3.5	14.1	-3.4	-6.1	-1.5	17.5	0.0271	0
26512	INTS6	integrator complex subunit 6	nucleus|actin cytoskeleton|integrator complex|	signal transduction|snRNA processing|	transmembrane signaling receptor activity|protein binding|	5	-1.3	5.47	5	-0.9	12.5	-0.9	-2.1	-0.5	17.4	0.0272	0
6223	RPS19	ribosomal protein S19	nucleolus|cytoplasm|cytosol|cytosol|ribosome|membrane|cytosolic small ribosomal subunit|extracellular vesicular exosome|	ribosomal small subunit assembly|nuclear-transcribed mRNA catabolic process, nonsense-mediated decay|maturation of SSU-rRNA from tricistronic rRNA transcript (SSU-rRNA, 5.8S rRNA, LSU-rRNA)|monocyte chemotaxis|rRNA processing|translation|translation|translational initiation|translational elongation|translational termination|SRP-dependent cotranslational protein targeting to membrane|nucleolus org…	structural constituent of ribosome|protein binding|fibroblast growth factor binding|protein kinase binding|protein homodimerization activity|poly(A) RNA binding|	5	-2.9	6.44	5	-2.7	11.4	-2.8	-5.2	-2	17.4	0.0272	0
8803	SUCLA2	succinate-CoA ligase, ADP-forming, beta subunit	mitochondrion|mitochondrial matrix|extracellular vesicular exosome|	tricarboxylic acid cycle|tricarboxylic acid cycle|succinyl-CoA metabolic process|succinate metabolic process|succinyl-CoA pathway|cellular metabolic process|small molecule metabolic process|	succinate-CoA ligase (ADP-forming) activity|protein binding|ATP binding|metal ion binding|	5	-2.4	7.95	5	-1.6	10.8	-1.7	-3.6	-0.8	17.4	0.0272	0
114908	TMEM123	transmembrane protein 123	external side of plasma membrane|integral component of membrane|	oncosis|	receptor activity|	5	3.2	2.72	5	3.3	15	3.2	2.6	5.9	17.4	0.0272	0
3881	KRT31	keratin 31	extracellular space|intermediate filament|	epidermis development|	structural constituent of cytoskeleton|	5	0.5	0.655	5	3.3	19.3	3.1	1.3	6	17.3	0.0273	0
6137	RPL13	ribosomal protein L13	nucleus|nucleolus|cytoplasm|cytosol|membrane|cytosolic large ribosomal subunit|cytosolic ribosome|	nuclear-transcribed mRNA catabolic process, nonsense-mediated decay|translation|translation|translational initiation|translational elongation|translational termination|SRP-dependent cotranslational protein targeting to membrane|gene expression|viral process|RNA metabolic process|mRNA metabolic process|viral life cycle|viral transcription|cellular protein metabolic process|	RNA binding|structural constituent of ribosome|protein binding|poly(A) RNA binding|	5	-3.7	13.6	5	-1.3	8.13	-3.6	-5.9	-0.8	17.3	0.0273	0
57325	CSRP2BP	CSRP2 binding protein	nucleus|Ada2/Gcn5/Ada3 transcription activator complex|cytoplasm|	G2/M transition of mitotic cell cycle|chromatin organization|embryo development|histone H3 acetylation|	histone acetyltransferase activity|protein binding|LIM domain binding|	5	-2.7	14.3	5	-1.3	5.38	-2.5	-4.4	-1.3	17.2	0.0274	0
9939	RBM8A	RNA binding motif protein 8A	nucleus|nucleus|nucleoplasm|cytoplasm|cytosol|nuclear speck|exon-exon junction complex|catalytic step 2 spliceosome|	nuclear-transcribed mRNA catabolic process, nonsense-mediated decay|nuclear-transcribed mRNA catabolic process, nonsense-mediated decay|regulation of alternative mRNA splicing, via spliceosome|mRNA splicing, via spliceosome|mRNA splicing, via spliceosome|transcription from RNA polymerase II promoter|termination of RNA polymerase II transcription|mRNA export from nucleus|regulation of translation|…	nucleotide binding|RNA binding|mRNA binding|protein binding|poly(A) RNA binding|	3	2.5	18.6	2	0	0	2.5	1.9	4.9	17.2	0.0274	0
58506	SCAF1	SR-related CTD-associated factor 1	nucleus|	transcription from RNA polymerase II promoter|mRNA processing|RNA splicing|	RNA binding|protein domain specific binding|	4	-2.3	4.34	4	-1.5	14.2	-2	-3.6	-1.1	17.1	0.0275	0
64072	CDH23	cadherin-related 23	plasma membrane|membrane|integral component of membrane|stereocilium|	calcium ion transport|homophilic cell adhesion|visual perception|sensory perception of sound|calcium-dependent cell-cell adhesion|photoreceptor cell maintenance|response to stimulus|sensory perception of light stimulus|equilibrioception|cytosolic calcium ion homeostasis|	calcium ion binding|protein binding|	5	-1.9	6.04	5	2.9	19	2.8	1.8	5.8	17	0.0276	0
219983	OR4D6	olfactory receptor, family 4, subfamily D, member 6	plasma membrane|integral component of membrane|	G-protein coupled receptor signaling pathway|detection of chemical stimulus involved in sensory perception of smell|	G-protein coupled receptor activity|olfactory receptor activity|	5	0.5	1.22	5	3.3	19	3.1	1.5	6	17	0.0276	0
5778	PTPN7	protein tyrosine phosphatase, non-receptor type 7	cytoplasm|cytosol|cytoskeleton|cytoplasmic side of plasma membrane|	protein dephosphorylation|peptidyl-tyrosine dephosphorylation|peptidyl-tyrosine dephosphorylation|	protein tyrosine phosphatase activity|protein binding|	5	1.6	3.44	5	3.1	15.4	2.8	1.4	5.9	17	0.0276	0
144715	RAD9B	RAD9 homolog B (S. pombe)	nucleoplasm|checkpoint clamp complex|	DNA damage checkpoint|DNA replication|DNA repair|	protein binding|	5	-1.6	2.84	5	-2.9	15.8	-2.8	-5.3	-1.2	17	0.0276	0
92342	METTL18	methyltransferase like 18	cytoplasm|	protein methylation|	protein methyltransferase activity|	5	-4	19	5	-0.7	0.406	-4	-8	-2.7	16.9	0.0277	0
84295	PHF6	PHD finger protein 6	nucleus|nucleoplasm|nucleolus|	transcription, DNA-templated|regulation of transcription, DNA-templated|	DNA binding|protein binding|zinc ion binding|tubulin binding|enzyme binding|histone binding|histone deacetylase binding|ribonucleoprotein complex binding|poly(A) RNA binding|phosphoprotein binding|scaffold protein binding|	5	-2.5	10.1	5	-1.6	8.47	-1.9	-4.1	-1.2	16.9	0.0277	0
23067	SETD1B	SET domain containing 1B	nucleus|chromosome|nuclear speck|histone methyltransferase complex|Set1C/COMPASS complex|	transcription, DNA-templated|regulation of transcription, DNA-templated|histone H3-K4 methylation|	nucleotide binding|RNA binding|protein binding|histone methyltransferase activity (H3-K4 specific)|	4	-2.5	4.18	4	-2.5	13.1	-2.5	-4.8	-1.8	16.9	0.0277	0
7637	ZNF84	zinc finger protein 84	nucleus|	transcription, DNA-templated|regulation of transcription, DNA-templated|	DNA binding|zinc ion binding|	5	-3.5	7.47	5	-4	10.2	-3.8	-7.6	-3.1	16.9	0.0277	0
23469	PHF3	PHD finger protein 3	cellular_component|nucleus|	transcription, DNA-templated|multicellular organismal development|	molecular_function|zinc ion binding|	5	-4	19.4	5	0	0	-4	-8	-2.4	16.8	0.0278	0
6499	SKIV2L	superkiller viralicidic activity 2-like (S. cerevisiae)	nucleus|Ski complex|	ATP catabolic process|	RNA binding|ATP-dependent RNA helicase activity|ATP binding|	5	-3.9	15.3	5	-1.5	4.65	-3.8	-7.5	-1	16.8	0.0278	0
55270	NUDT15	nudix (nucleoside diphosphate linked moiety X)-type motif 15	cytosol|	GTP catabolic process|dGTP catabolic process|nucleobase-containing small molecule catabolic process|small molecule metabolic process|nucleobase-containing small molecule metabolic process|	8-oxo-7,8-dihydroguanosine triphosphate pyrophosphatase activity|8-oxo-7,8-dihydrodeoxyguanosine triphosphate pyrophosphatase activity|metal ion binding|	5	2.6	5.77	5	3.4	12	3.1	2.2	5.8	16.7	0.0279	0
5499	PPP1CA	protein phosphatase 1, catalytic subunit, alpha isozyme	protein phosphatase type 1 complex|nucleus|nucleolus|cytoplasm|cytosol|glycogen granule|dendritic spine|perikaryon|extracellular vesicular exosome|MLL5-L complex|PTW/PP1 phosphatase complex|	glycogen metabolic process|regulation of glycogen biosynthetic process|regulation of glycogen catabolic process|protein dephosphorylation|protein dephosphorylation|cell cycle|transforming growth factor beta receptor signaling pathway|triglyceride catabolic process|lung development|negative regulation of transforming growth factor beta receptor signaling pathway|circadian regulation of gene expres…	protein serine/threonine phosphatase activity|protein binding|phosphatase activity|ribonucleoprotein complex binding|metal ion binding|	10	2.4	2.05	10	3.3	15.7	3	1.7	6	16.7	0.0279	0
10284	SAP18	Sin3A-associated protein, 18kDa	histone deacetylase complex|nucleus|cytoplasm|nuclear speck|exon-exon junction complex|ASAP complex|	regulation of alternative mRNA splicing, via spliceosome|regulation of alternative mRNA splicing, via spliceosome|transcription, DNA-templated|regulation of transcription from RNA polymerase II promoter|mRNA processing|RNA splicing|positive regulation of apoptotic process|negative regulation of mRNA splicing, via spliceosome|	transcription corepressor activity|protein binding|poly(A) RNA binding|	5	-1.7	9.37	5	-2.6	9.07	-2.5	-4.4	-1.2	16.6	0.028	0
471	ATIC	5-aminoimidazole-4-carboxamide ribonucleotide formyltransferase/IMP cyclohydrolase	mitochondrion|cytosol|membrane|extracellular vesicular exosome|	brainstem development|nucleobase-containing compound metabolic process|purine nucleobase metabolic process|'de novo' IMP biosynthetic process|nucleoside metabolic process|purine ribonucleoside monophosphate biosynthetic process|response to inorganic substance|cerebellum development|cerebral cortex development|organ regeneration|small molecule metabolic process|dihydrofolate metabolic process|tetr…	IMP cyclohydrolase activity|phosphoribosylaminoimidazolecarboxamide formyltransferase activity|protein homodimerization activity|	5	-3.7	11.7	5	-2.6	6	-3.6	-6.6	-2.3	16.5	0.0281	0
51622	CCZ1	CCZ1 vacuolar protein trafficking and biogenesis associated homolog (S. cerevisiae)	lysosomal membrane|	None	None	5	-4	16.7	5	-1.4	2.23	-3.9	-8	-2.4	16.5	0.0281	0
8087	FXR1	fragile X mental retardation, autosomal homolog 1	nucleolus|cytoplasm|polysome|membrane|costamere|	apoptotic process|muscle organ development|negative regulation of translation|cell differentiation|	G-quadruplex RNA binding|RNA binding|mRNA 3'-UTR binding|poly(A) RNA binding|	5	2.2	5.21	5	2.6	12.1	2.5	1.7	4.5	16.5	0.0281	0
1984	EIF5A	eukaryotic translation initiation factor 5A	nucleus|annulate lamellae|nuclear pore|cytoplasm|endoplasmic reticulum membrane|cytosol|membrane|extracellular vesicular exosome|	mRNA export from nucleus|translational frameshifting|protein export from nucleus|nucleocytoplasmic transport|apoptotic process|positive regulation of cell proliferation|peptidyl-lysine modification to peptidyl-hypusine|post-translational protein modification|cellular protein metabolic process|positive regulation of translational elongation|positive regulation of translational termination|	RNA binding|translation elongation factor activity|protein binding|U6 snRNA binding|ribosome binding|poly(A) RNA binding|protein N-terminus binding|	5	3.8	7.54	5	2.6	10.5	3.5	2.2	6.6	16.4	0.0282	0
5621	PRNP	prion protein	nucleus|cytoplasm|mitochondrial outer membrane|endoplasmic reticulum|Golgi apparatus|plasma membrane|integral component of membrane|extrinsic component of membrane|anchored component of membrane|membrane raft|extracellular vesicular exosome|	negative regulation of protein phosphorylation|cellular copper ion homeostasis|response to oxidative stress|cell cycle arrest|axon guidance|learning or memory|metabolic process|negative regulation of interferon-gamma production|negative regulation of interleukin-17 production|negative regulation of interleukin-2 production|negative regulation of apoptotic process|negative regulation of sequence-s…	copper ion binding|copper ion binding|protein binding|microtubule binding|tubulin binding|identical protein binding|ATP-dependent protein binding|chaperone binding|	5	-3.8	11.8	5	-2.3	6.58	-3.7	-6.9	-2.4	16.4	0.0282	0
6118	RPA2	replication protein A2, 32kDa	chromosome, telomeric region|nucleus|nucleoplasm|DNA replication factor A complex|DNA replication factor A complex|PML body|PML body|site of double-strand break|	G1/S transition of mitotic cell cycle|mitotic cell cycle|nucleotide-excision repair, DNA damage removal|telomere maintenance via recombination|telomere maintenance|telomere maintenance|double-strand break repair via homologous recombination|double-strand break repair via homologous recombination|DNA recombinase assembly|DNA replication|DNA replication|DNA replication|DNA strand elongation involve…	damaged DNA binding|single-stranded DNA binding|single-stranded DNA binding|single-stranded DNA binding|protein binding|enzyme binding|protein phosphatase binding|ubiquitin protein ligase binding|protein N-terminus binding|	4	3	3.73	5	-3.4	15.7	-3.3	-6.1	-1.3	16.4	0.0282	0
6202	RPS8	ribosomal protein S8	nucleus|cytoplasm|cytosol|membrane|cytosolic small ribosomal subunit|cytosolic small ribosomal subunit|ribonucleoprotein complex|extracellular vesicular exosome|	nuclear-transcribed mRNA catabolic process, nonsense-mediated decay|maturation of SSU-rRNA from tricistronic rRNA transcript (SSU-rRNA, 5.8S rRNA, LSU-rRNA)|translation|translation|translation|translational initiation|translational elongation|translational termination|SRP-dependent cotranslational protein targeting to membrane|gene expression|viral process|RNA metabolic process|mRNA metabolic pro…	structural constituent of ribosome|poly(A) RNA binding|	5	2.2	5.78	5	-2.2	13.4	-2.3	-4.5	-1.7	16.4	0.0282	0
54663	WDR74	WD repeat domain 74	nucleus|nucleolus|	blastocyst formation|biological_process|RNA metabolic process|	molecular_function|	10	-2.3	9.22	10	-1.6	8.27	-1.8	-3.2	-1	16.4	0.0282	0
1392	CRH	corticotropin releasing hormone	extracellular region|extracellular space|cytoplasm|varicosity|perikaryon|	positive regulation of protein phosphorylation|synaptic transmission, dopaminergic|glucocorticoid biosynthetic process|inflammatory response|signal transduction|synaptic transmission|female pregnancy|parturition|learning or memory|long-term memory|feeding behavior|positive regulation of cell proliferation|associative learning|hormone-mediated apoptotic signaling pathway|positive regulation of gen…	receptor binding|hormone activity|neuropeptide hormone activity|protein binding|corticotropin-releasing hormone activity|corticotropin-releasing hormone receptor 1 binding|corticotropin-releasing hormone receptor 2 binding|	5	0.4	0.518	5	3.2	18.4	3.2	1.5	6	16.3	0.0283	0
23197	FAF2	Fas associated factor family member 2	endoplasmic reticulum|lipid particle|Cdc48p-Npl4p-Ufd1p AAA ATPase complex|intracellular membrane-bounded organelle|	response to unfolded protein|lipid particle organization|negative regulation of catalytic activity|	protein binding|ubiquitin protein ligase binding|lipase binding|ubiquitin binding|lipase inhibitor activity|	5	1.1	4.77	5	1.4	12.1	1.3	0.7	2.5	16.3	0.0283	0
5356	PLRG1	pleiotropic regulator 1	nucleus|nuclear speck|catalytic step 2 spliceosome|	mRNA splicing, via spliceosome|signal transduction|regulation of RNA biosynthetic process|	transcription corepressor activity|signal transducer activity|protein binding|	5	3.1	16.2	4	0.9	3.16	3	1.1	5.1	16.3	0.0283	0
10286	BCAS2	breast carcinoma amplified sequence 2	nucleus|spliceosomal complex|nucleolus|cell junction|	RNA splicing, via transesterification reactions|mRNA processing|RNA splicing|	protein binding|	5	2	6.43	5	1.8	10.2	1.8	0.9	3.3	16.2	0.0285	0
401498	TMEM215	transmembrane protein 215	integral component of membrane|	None	None	5	-2.6	4.02	5	-3.2	12.9	-3	-5.9	-2.3	16.2	0.0285	0
5558	PRIM2	primase, DNA, polypeptide 2 (58kDa)	nucleoplasm|primosome complex|	G1/S transition of mitotic cell cycle|mitotic cell cycle|telomere maintenance via recombination|telomere maintenance|DNA replication, synthesis of RNA primer|DNA replication initiation|DNA strand elongation involved in DNA replication|telomere maintenance via semi-conservative replication|	DNA binding|DNA primase activity|metal ion binding|4 iron, 4 sulfur cluster binding|	5	-2.1	8.5	4	-1.2	9.28	-1.4	-3.3	-0.9	16.1	0.0286	0
5700	PSMC1	proteasome (prosome, macropain) 26S subunit, ATPase, 1	proteasome complex|nucleus|nucleoplasm|cytoplasm|cytosol|membrane|proteasome accessory complex|	G1/S transition of mitotic cell cycle|protein polyubiquitination|mitotic cell cycle|antigen processing and presentation of peptide antigen via MHC class I|antigen processing and presentation of exogenous peptide antigen via MHC class I, TAP-dependent|ATP catabolic process|regulation of cellular amino acid metabolic process|apoptotic process|DNA damage response, signal transduction by p53 class me…	protein binding|ATP binding|ATPase activity|TBP-class protein binding|poly(A) RNA binding|	5	-1.4	1.59	5	-1.8	15.3	-1.8	-3.4	-0.9	16.1	0.0286	0
22827	PUF60	poly-U binding splicing factor 60KDa	cyclin-dependent protein kinase activating kinase holoenzyme complex|ribonucleoprotein complex|	transcription, DNA-templated|regulation of transcription, DNA-templated|mRNA processing|apoptotic process|RNA splicing|	nucleotide binding|DNA binding|protein binding|identical protein binding|poly(A) RNA binding|	5	2.1	10.9	5	1.2	6.81	1.9	1	3.5	16.1	0.0286	0
6010	RHO	rhodopsin	photoreceptor outer segment|photoreceptor inner segment|Golgi apparatus|plasma membrane|integral component of plasma membrane|rough endoplasmic reticulum membrane|photoreceptor outer segment membrane|photoreceptor inner segment membrane|photoreceptor disc membrane|	retinoid metabolic process|protein phosphorylation|G-protein coupled receptor signaling pathway|visual perception|phototransduction, visible light|red, far-red light phototransduction|rhodopsin mediated signaling pathway|protein-chromophore linkage|regulation of rhodopsin mediated signaling pathway|retina development in camera-type eye|	G-protein coupled receptor activity|protein binding|photoreceptor activity|retinal binding|metal ion binding|	5	-4	17.1	5	-1.2	1.52	-4	-8	-2.6	16.1	0.0286	0
64282	PAPD5	PAP associated domain containing 5	cellular_component|nucleolus|cytoplasm|	DNA-dependent DNA replication|rRNA processing|mRNA processing|mitotic nuclear division|histone mRNA catabolic process|	DNA binding|DNA-directed DNA polymerase activity|polynucleotide adenylyltransferase activity|poly(A) RNA binding|metal ion binding|	5	-1.4	10.2	5	-1	6.57	-1.2	-2.4	-0.7	15.9	0.0288	0
5984	RFC4	replication factor C (activator 1) 4, 37kDa	nucleoplasm|DNA replication factor C complex|	mitotic cell cycle|telomere maintenance via recombination|telomere maintenance|DNA replication|DNA replication|DNA strand elongation involved in DNA replication|DNA repair|DNA repair|transcription-coupled nucleotide-excision repair|nucleotide-excision repair|nucleotide-excision repair, DNA gap filling|telomere maintenance via semi-conservative replication|phosphatidylinositol-mediated signaling|	DNA binding|protein binding|ATP binding|nucleoside-triphosphatase activity|	5	-2.9	5.64	5	-3.4	11	-3.2	-6.2	-2.2	15.9	0.0288	0
200726	LOC200726	hCG1657980	None	None	None	4	-2.4	10.8	4	-2.7	5.73	-2.6	-4.8	-2	15.8	0.0289	0
59272	ACE2	angiotensin I converting enzyme 2	extracellular region|extracellular space|plasma membrane|plasma membrane|cell surface|integral component of membrane|membrane raft|extracellular vesicular exosome|	regulation of cytokine production|angiotensin maturation|angiotensin catabolic process in blood|angiotensin-mediated drinking behavior|regulation of systemic arterial blood pressure by renin-angiotensin|regulation of systemic arterial blood pressure by renin-angiotensin|proteolysis|response to virus|response to virus|regulation of vasoconstriction|receptor biosynthetic process|regulation of cell …	virus receptor activity|virus receptor activity|glycoprotein binding|endopeptidase activity|carboxypeptidase activity|protein binding|zinc ion binding|peptide hormone binding|	5	-4	18.5	5	0	0	-4	-8	-2.6	15.7	0.0291	0
79866	BORA	bora, aurora kinase A activator	cytosol|	G2/M transition of mitotic cell cycle|mitotic cell cycle|mitotic nuclear division|regulation of mitosis|regulation of protein localization|regulation of mitotic spindle organization|	protein binding|protein kinase binding|	5	-2.4	12	5	-0.9	6.67	-1.6	-3.8	-0.8	15.7	0.0291	0
51428	DDX41	DEAD (Asp-Glu-Ala-Asp) box polypeptide 41	endoplasmic reticulum|cytosol|membrane|catalytic step 2 spliceosome|	mRNA splicing, via spliceosome|RNA processing|apoptotic process|multicellular organismal development|regulation of type I interferon production|positive regulation of type I interferon production|cellular response to interferon-beta|innate immune response|positive regulation of transcription from RNA polymerase II promoter|defense response to virus|	DNA binding|helicase activity|protein binding|ATP binding|zinc ion binding|poly(A) RNA binding|	5	2.2	8.17	5	2	7.93	2.1	1.3	3.7	15.7	0.0291	0
1655	DDX5	DEAD (Asp-Glu-Ala-Asp) box helicase 5	nucleus|nucleus|nucleolus|membrane|ribonucleoprotein complex|extracellular vesicular exosome|catalytic step 2 spliceosome|	negative regulation of transcription from RNA polymerase II promoter|regulation of alternative mRNA splicing, via spliceosome|mRNA splicing, via spliceosome|in utero embryonic development|ATP catabolic process|transcription, DNA-templated|circadian rhythm|cell growth|positive regulation of intracellular estrogen receptor signaling pathway|positive regulation of DNA damage response, signal transdu…	transcription coactivator activity|RNA helicase activity|RNA helicase activity|ATP-dependent RNA helicase activity|protein binding|calmodulin binding|ATP binding|enzyme binding|estrogen receptor binding|pre-mRNA binding|poly(A) RNA binding|calcium-dependent protein binding|androgen receptor binding|	5	1.2	2.58	5	2	14.2	1.8	1.1	3.5	15.7	0.0291	0
25983	NGDN	neuroguidin, EIF4E binding protein	chromosome, centromeric region|nucleolus|cytoplasm|filopodium|axon|dendrite|	regulation of translation|	poly(A) RNA binding|	5	-3	15.1	5	-0.8	5.03	-2.9	-5.5	-1.9	15.7	0.0291	0
91603	ZNF830	zinc finger protein 830	nucleus|cytoplasm|nuclear speck|	blastocyst growth|mitotic nuclear division|nuclear cell cycle DNA replication|	protein binding|metal ion binding|	5	3.1	10.1	5	1.8	7.81	2.8	1	4.7	15.7	0.0291	0
27292	DIMT1	DIM1 dimethyladenosine transferase 1 homolog (S. cerevisiae)	nucleus|nucleolus|cytoplasm|	rRNA methylation|	rRNA (adenine-N6,N6-)-dimethyltransferase activity|poly(A) RNA binding|18S rRNA (adenine(1779)-N(6)/adenine(1780)-N(6))-dimethyltransferase activity|	5	-3	8.74	5	-2	8.41	-2.8	-5.1	-1.7	15.6	0.0292	0
5787	PTPRB	protein tyrosine phosphatase, receptor type, B	integral component of plasma membrane|receptor complex|	angiogenesis|protein dephosphorylation|phosphate-containing compound metabolic process|dephosphorylation|peptidyl-tyrosine dephosphorylation|peptidyl-tyrosine dephosphorylation|	transmembrane receptor protein tyrosine phosphatase activity|protein binding|	5	2.3	10.4	5	3.6	7.11	3.3	1.8	6.3	15.6	0.0292	0
9985	REC8	REC8 meiotic recombination protein	condensed nuclear chromosome kinetochore|lateral element|male germ cell nucleus|nucleus|nuclear meiotic cohesin complex|	double-strand break repair via homologous recombination|oocyte maturation|sister chromatid cohesion|meiotic nuclear division|reciprocal meiotic recombination|male meiosis I|spermatogenesis|spermatid development|fertilization|linear element assembly|seminiferous tubule development|	None	5	-2	13.6	5	-1.8	2.37	-1.9	-3.6	-1.2	15.6	0.0292	0
6954	TCP11	t-complex 11, testis-specific	integral component of membrane|	multicellular organismal development|spermatogenesis|cell differentiation|	None	5	1.4	0.634	5	3	16.4	2.8	1.7	6	15.6	0.0292	0
145407	C14ORF37	chromosome 14 open reading frame 37	integral component of membrane|	None	None	4	-1.2	4.57	4	-3.2	13.8	-3.1	-6	-1.8	15.5	0.0293	0
283807	FBXL22	F-box and leucine-rich repeat protein 22	Z disc|	protein ubiquitination|	None	5	-3.6	16.5	5	1.5	2.27	-3.5	-6.4	-1.3	15.5	0.0293	0
55388	MCM10	minichromosome maintenance complex component 10	nucleus|nucleoplasm|nucleolus|cytoplasm|	G1/S transition of mitotic cell cycle|mitotic cell cycle|DNA replication|cell proliferation|	DNA binding|protein binding|identical protein binding|metal ion binding|	5	-3.1	8.4	5	-2.3	8.35	-2.9	-5.3	-1.6	15.5	0.0293	0
112950	MED8	mediator complex subunit 8	nucleoplasm|mediator complex|	regulation of transcription from RNA polymerase II promoter|transcription initiation from RNA polymerase II promoter|gene expression|protein ubiquitination|	RNA polymerase II transcription cofactor activity|protein binding|	5	-3	2.88	5	-4	13.6	-4	-7.8	-3.1	15.5	0.0293	0
5832	ALDH18A1	aldehyde dehydrogenase 18 family, member A1	cytoplasm|mitochondrion|mitochondrial inner membrane|	glutamate metabolic process|proline biosynthetic process|ornithine biosynthetic process|cellular amino acid biosynthetic process|phosphorylation|citrulline biosynthetic process|cellular nitrogen compound metabolic process|small molecule metabolic process|oxidation-reduction process|L-proline biosynthetic process|	glutamate 5-kinase activity|glutamate-5-semialdehyde dehydrogenase activity|ATP binding|poly(A) RNA binding|	5	2.4	8.43	5	1.1	9.53	1.2	0.7	3.5	15.4	0.0294	0
338761	C1QL4	complement component 1, q subcomponent-like 4	extracellular region|collagen trimer|	None	None	5	2.9	9.97	5	4	6.98	3.7	2.6	7.3	15.4	0.0294	0
51184	GPN3	GPN-loop GTPase 3	protein complex|	None	GTP binding|	5	-2	9.41	5	-3.9	9.23	-3.7	-7.1	-1.6	15.4	0.0294	0
7037	TFRC	transferrin receptor	extracellular region|extracellular space|endosome|plasma membrane|integral component of plasma membrane|coated pit|external side of plasma membrane|cell surface|membrane|cytoplasmic membrane-bounded vesicle|melanosome|intracellular membrane-bounded organelle|perinuclear region of cytoplasm|extracellular vesicular exosome|blood microparticle|	proteolysis|cellular iron ion homeostasis|cellular iron ion homeostasis|receptor-mediated endocytosis|receptor-mediated endocytosis|viral process|osteoclast differentiation|transferrin transport|positive regulation of bone resorption|transmembrane transport|iron ion import|	double-stranded RNA binding|transferrin receptor activity|protein binding|peptidase activity|identical protein binding|poly(A) RNA binding|	5	-2.7	11.3	5	-1.3	6.78	-2.5	-4.3	-1.2	15.4	0.0294	0
23732	FRRS1L	ferric-chelate reductase 1-like	cellular_component|plasma membrane|integral component of membrane|cell junction|synapse|	biological_process|	molecular_function|	5	-1.5	3.57	5	-3.2	14	-3.1	-6	-1.6	15.3	0.0296	0
54797	MED18	mediator complex subunit 18	mediator complex|	regulation of transcription from RNA polymerase II promoter|transcription from RNA polymerase II promoter|	RNA polymerase II transcription cofactor activity|protein binding|	5	-2.2	3.31	5	-3.2	13.2	-3.1	-5.9	-2.1	15.3	0.0296	0
1105	CHD1	chromodomain helicase DNA binding protein 1	nucleus|cytoplasm|	chromatin remodeling|transcription, DNA-templated|regulation of transcription from RNA polymerase II promoter|DNA duplex unwinding|	DNA binding|ATP-dependent DNA helicase activity|protein binding|ATP binding|methylated histone binding|	5	1.8	6.52	5	1.7	9.1	1.7	0.9	3.3	15.2	0.0297	0
1106	CHD2	chromodomain helicase DNA binding protein 2	nucleus|extracellular vesicular exosome|	transcription, DNA-templated|regulation of transcription from RNA polymerase II promoter|cellular response to DNA damage stimulus|muscle organ development|chromatin modification|DNA duplex unwinding|hematopoietic stem cell differentiation|	core promoter sequence-specific DNA binding|DNA binding|ATP-dependent DNA helicase activity|ATP binding|histone binding|poly(A) RNA binding|	10	-1.7	8.63	10	-1.6	6.98	-1.6	-2.6	-0.8	15.2	0.0297	0
7881	KCNAB1	potassium voltage-gated channel, shaker-related subfamily, beta member 1	cytoplasm|plasma membrane|integral component of membrane|	potassium ion transport|synaptic transmission|learning or memory|potassium ion transmembrane transport|regulation of potassium ion transmembrane transporter activity|	voltage-gated potassium channel activity|potassium channel regulator activity|	5	-0.6	0.991	5	3.3	17.6	3.3	2.1	6	15.2	0.0297	0
3622	ING2	inhibitor of growth family, member 2	nucleus|Sin3 complex|CCAAT-binding factor complex|	transcription, DNA-templated|regulation of transcription, DNA-templated|male meiosis I|signal transduction|spermatogenesis|spermatid development|negative regulation of cell proliferation|chromatin modification|sperm motility|positive regulation of transforming growth factor beta receptor signaling pathway|regulation of growth|positive regulation of apoptotic process|positive regulation of transcr…	DNA binding|chromatin binding|protein binding|zinc ion binding|protein complex binding|methylated histone binding|phosphatidylinositol binding|	5	-1.4	6.56	5	-2.6	10.9	-2.4	-4.3	-1	15.1	0.0299	0
3800	KIF5C	kinesin family member 5C	cytoplasm|kinesin complex|microtubule|	organelle organization|microtubule-based movement|metabolic process|metabolic process|mRNA transport|	microtubule motor activity|protein binding|ATP binding|microtubule binding|	5	-2.9	3.14	5	-3.1	12.4	-3	-5.9	-2.4	15.1	0.0299	0
140733	MACROD2	MACRO domain containing 2	nucleus|	cellular response to DNA damage stimulus|brain development|purine nucleoside metabolic process|protein de-ADP-ribosylation|	hydrolase activity, acting on glycosyl bonds|deacetylase activity|	5	-4	17.6	5	0.4	1.39	-4	-8	-2.8	15.1	0.0299	0
84271	POLDIP3	polymerase (DNA-directed), delta interacting protein 3	transcription export complex|cytoplasm|nuclear speck|exon-exon junction complex|	poly(A)+ mRNA export from nucleus|positive regulation of translation|	nucleotide binding|protein binding|poly(A) RNA binding|	5	0.7	3.32	5	1.6	13.7	1.4	0.7	3	15.1	0.0299	0
4796	TONSL	tonsoku-like, DNA repair protein	nucleus|DNA replication factor A complex|cytoplasm|FACT complex|MCM complex|nuclear replication fork|	double-strand break repair via homologous recombination|replication fork processing|cytoplasmic sequestering of transcription factor|regulation of RNA biosynthetic process|	transcription corepressor activity|protein binding|histone binding|	5	-3	5.4	5	-2.9	10.1	-3	-5.6	-2.1	15.1	0.0299	0
219699	UNC5B	unc-5 homolog B (C. elegans)	integral component of membrane|	apoptotic process|signal transduction|axon guidance|positive regulation of phosphatidylinositol 3-kinase signaling|anterior/posterior axon guidance|regulation of apoptotic process|positive regulation of apoptotic process|negative regulation of neuron apoptotic process|negative regulation of extrinsic apoptotic signaling pathway in absence of ligand|	protein binding|	5	-3.3	5	5	-2.2	12	-3.1	-5.5	-1.8	15.1	0.0299	0
4702	NDUFA8	NADH dehydrogenase (ubiquinone) 1 alpha subcomplex, 8, 19kDa	mitochondrion|mitochondrial inner membrane|mitochondrial respiratory chain complex I|mitochondrial respiratory chain complex I|mitochondrial intermembrane space|	mitochondrial electron transport, NADH to ubiquinone|respiratory electron transport chain|cellular metabolic process|small molecule metabolic process|	NADH dehydrogenase (ubiquinone) activity|protein complex binding|	5	-1.2	5.87	5	-1.1	9.59	-1.1	-2	-0.7	15	0.03	0
121441	NEDD1	neural precursor cell expressed, developmentally down-regulated 1	centrosome|cytosol|	G2/M transition of mitotic cell cycle|mitotic cell cycle|mitotic nuclear division|	None	4	-3	13.2	3	-1	4.51	-2.9	-5.4	-1.3	15	0.03	0
6950	TCP1	t-complex 1	pericentriolar material|acrosomal vesicle|zona pellucida receptor complex|nuclear heterochromatin|Golgi apparatus|centrosome|cytosol|chaperonin-containing T-complex|microtubule|cell body|extracellular vesicular exosome|	protein folding|tubulin complex assembly|binding of sperm to zona pellucida|cellular protein metabolic process|'de novo' posttranslational protein folding|	protein binding|ATP binding|poly(A) RNA binding|unfolded protein binding|	5	-2.5	4.63	5	-3.1	11.2	-3	-5.8	-2.2	15	0.03	0
338440	ANO9	anoctamin 9	intracellular|plasma membrane|plasma membrane|integral component of membrane|	chloride transport|ion transmembrane transport|transmembrane transport|chloride transmembrane transport|negative regulation of intracellular calcium activated chloride channel activity|	intracellular calcium activated chloride channel activity|	5	1.2	0.935	5	2.9	15.7	2.8	1.3	5.7	14.9	0.0301	0
26526	TSPAN16	tetraspanin 16	integral component of membrane|	None	None	5	0	0	5	3.2	17.4	3.2	2	6	14.9	0.0301	0
1315	COPB1	coatomer protein complex, subunit beta 1	Golgi membrane|cytoplasm|endoplasmic reticulum-Golgi intermediate compartment|Golgi apparatus|Golgi-associated vesicle|cytosol|plasma membrane|membrane|COPI vesicle coat|intracellular membrane-bounded organelle|	intracellular protein transport|retrograde vesicle-mediated transport, Golgi to ER|intra-Golgi vesicle-mediated transport|viral process|COPI coating of Golgi vesicle|membrane organization|	structural molecule activity|protein binding|	5	1.4	11.2	5	1.8	4.37	1.6	0.8	3.2	14.8	0.0303	0
221303	FAM162B	family with sequence similarity 162, member B	integral component of membrane|	None	None	5	3.2	2.69	5	-4.1	17.5	-4.1	-8	-3.3	14.8	0.0303	0
8729	GBF1	golgi brefeldin A resistant guanine nucleotide exchange factor 1	Golgi membrane|mitochondrion|peroxisome|endoplasmic reticulum lumen|Golgi apparatus|Golgi stack|cis-Golgi network|trans-Golgi network|membrane|	retrograde vesicle-mediated transport, Golgi to ER|post-Golgi vesicle-mediated transport|viral process|vesicle-mediated transport|regulation of ARF protein signal transduction|positive regulation of GTPase activity|positive regulation of GTPase activity|COPI coating of Golgi vesicle|membrane organization|	ARF guanyl-nucleotide exchange factor activity|protein binding|	5	0.5	0.645	5	-3.3	17.2	-3.3	-6.6	-1.4	14.8	0.0303	0
11143	KAT7	K(lysine) acetyltransferase 7	histone acetyltransferase complex|nucleus|nucleoplasm|nucleoplasm|cytoplasm|	DNA replication|chromatin organization|transcription, DNA-templated|regulation of transcription, DNA-templated|histone H3 acetylation|histone H4-K5 acetylation|histone H4-K8 acetylation|histone H4-K12 acetylation|	sequence-specific DNA binding transcription factor activity|histone acetyltransferase activity|protein binding|zinc ion binding|	5	-2.1	2.94	5	-1.4	13.2	-1.5	-3.4	-0.9	14.8	0.0303	0
55173	MRPS10	mitochondrial ribosomal protein S10	mitochondrion|ribosome|	biological_process|	molecular_function|	5	-1.6	7.95	5	-1.2	7.72	-1.5	-2.7	-0.8	14.8	0.0303	0
81576	CCDC130	coiled-coil domain containing 130	cellular_component|	response to virus|	protein binding|	9	-2.1	6.78	9	-1.1	8.98	-1.2	-2.7	-0.7	14.7	0.0305	0
8065	CUL5	cullin 5	nucleus|cytosol|plasma membrane|Cul5-RING ubiquitin ligase complex|	G1/S transition of mitotic cell cycle|ubiquitin-dependent protein catabolic process|response to osmotic stress|cell cycle arrest|cell proliferation|negative regulation of cell proliferation|viral process|protein ubiquitination|cytosolic calcium ion homeostasis|calcium ion transmembrane transport|intrinsic apoptotic signaling pathway|	receptor activity|calcium channel activity|protein binding|ubiquitin protein ligase binding|	5	-1.4	13	5	-0.8	3.01	-1.2	-2.6	-0.7	14.7	0.0305	0
80155	NAA15	N(alpha)-acetyltransferase 15, NatA auxiliary subunit	nucleus|transcription factor complex|cytoplasm|membrane|NatA complex|	angiogenesis|transcription, DNA-templated|N-terminal protein amino acid acetylation|cell differentiation|negative regulation of apoptotic process|positive regulation of transcription, DNA-templated|protein stabilization|	protein binding|N-acetyltransferase activity|acetyltransferase activity|ribosome binding|ribosome binding|poly(A) RNA binding|	5	1.4	4.71	5	3	12.5	2.7	0.8	5.3	14.7	0.0305	0
23221	RHOBTB2	Rho-related BTB domain containing 2	cytosol|plasma membrane|	small GTPase mediated signal transduction|regulation of small GTPase mediated signal transduction|	GTP binding|	5	-2.5	4.31	5	-3	11.2	-2.9	-5.8	-2	14.7	0.0305	0
91272	BOD1	biorientation of chromosomes in cell division 1	condensed chromosome kinetochore|cytoplasm|microtubule organizing center|	mitotic nuclear division|	None	5	-1.3	3.19	5	-1.3	11.8	-1.3	-2.6	-0.7	14.6	0.0306	0
10523	CHERP	calcium homeostasis endoplasmic reticulum protein	cytoplasm|membrane|sarcoplasmic reticulum membrane|perinuclear region of cytoplasm|	RNA processing|cellular calcium ion homeostasis|nervous system development|negative regulation of cell proliferation|release of sequestered calcium ion into cytosol|positive regulation of NFAT protein import into nucleus|	protein binding|ion channel binding|poly(A) RNA binding|	5	-1.9	7.91	5	-2.2	7.41	-2.1	-3.7	-1.3	14.6	0.0306	0
[truncated: 18,184 more rows]

## Sheet: Sublibrary_sgRNAs
Internal_ID	Gene	sgRNA
281	AASDHPPT	GGCCATCAGGCCCGAGATAG
282	AASDHPPT	GCGGACCTCGCCGCTATCTC
283	AASDHPPT	GGGCACCAAGCAGAACCGTT
284	AASDHPPT	GGCCATCGCGGCCTCCAAGG
285	AASDHPPT	GACGGACGCCGGGAAGAAGG
531	ABCB7	GAGCCGCTAACAGAGACTAA
532	ABCB7	GTAGGCTCGAGCGGTTCCCA
533	ABCB7	GATGCATTCTTGGCGCTGGG
534	ABCB7	GGATCAGAATCGCGGAGTGC
535	ABCB7	GAAGGGCAAGGGGACCTGTA
731	ABCE1	GCGTTGGCGAAGCCAGCTGC
732	ABCE1	GCTGTGTGGCTGAAAAGTGA
733	ABCE1	GGCCGTGAGAACACGCTGTG
734	ABCE1	GCGGCCACCGGCCAAAATGG
735	ABCE1	GAAAGGGGGAGTGGAGACTA
971	ABHD17C	GGGCTGGCCCGGGAGGACGG
[truncated: 3,414 more rows]

## Sheet: TA_Sublibrary
Entrez ID	Symbol	Gene Info	Localization	Process	Function	# elements 1	casTLE Effect 1	casTLE Score 1	# elements 2	casTLE Effect 2	casTLE Score 2	Minimum Effect Estimate	Maximum Effect Estimate	Combo casTLE Effect	Combo casTLE Score	casTLE p-value	10% FDR
[truncated: 586 more rows]

[truncated: 4 more sheets: SA_Sublibrary, ER_Sublibrary, Sublibrary_comparison, Hits&Validation]
