# Supplementary material for: An engineered transcriptional reporter of protein localization identifies regulators of mitochondrial and ER membrane protein trafficking in high-throughput CRISPRi screens
Source: eLife. 2021 Aug 20;10:e69142. doi: 10.7554/eLife.69142 (PMC8423448; doi:10.7554/eLife.69142)
Supplement: Supplementary file 3. — Results_MedNormed: abundance values and statistical analysis of experimental replicates, normalized to median abundance value in the replicate/column. Results_MitoNormed: abundance values and statistical analysis of experimental replicates, normalized to mean abundance value across mitochondrial proteins in the replicate/column. Results_ER-Normed: abundance values and statistical analysis of experimental replicates, normalized to mean abundance value across ER proteins in the replicate/column. [file elife-69142-supp3.xlsx]

## Sheet: ColumnDefinitions
Column Value	Explanation
UniprotID	Uniprot database identifier
Isoform	Uniprot database identifier - isoform specific
Symbol	Gene Name
Localization	Assigned cellular localization
s127N_Control	Abundance in control sample (NT sgRNA, nfBFP overexpression), replicate 1
s127C_Control	Abundance in control sample (NT sgRNA, nfBFP overexpression), replicate 3
s129C_Control	Abundance in control sample (NT sgRNA, nfBFP overexpression), replicate 3
s129N_OE	Abundance in overexpression sample (NT sgRNA, SAE1 overexpression), replicate 1
s130C_OE	Abundance in overexpression sample (NT sgRNA, SAE1 overexpression), replicate 2
s132N_OE	Abundance in overexpression sample (NT sgRNA, SAE1 overexpression), replicate 3
s126C_KD	Abundance in knockdown sample (SAE1 sgRNA, nfBFP overexpression), replicate 1
s131N_KD	Abundance in knockdown sample (SAE1 sgRNA, nfBFP overexpression), replicate 2
s131C_KD	Abundance in knockdown sample (SAE1 sgRNA, nfBFP overexpression), replicate 3
s128N_Rescue	Abundance in rescue sample (SAE1 sgRNA, SAE1 overexpression), replicate 1
s128C_Rescue	Abundance in rescue sample (SAE1 sgRNA, SAE1 overexpression), replicate 2
s130N_Rescue	Abundance in rescue sample (SAE1 sgRNA, SAE1 overexpression), replicate 3
OEvsControl_adjP	Benjamini-Hochberg corrected p-value for the two-sample moderated t-test, overexpression vs control conditions
OEvsControl_logFC	Log2-transformed change in mean abundance, overexpression vs control conditions
KDvsControl_adjPval	Benjamini-Hochberg corrected p-value for the two-sample moderated t-test, knockdown vs control conditions
KDvsControl_logFC	Log2-transformed change in mean abundance, knockdown vs control conditions
RescueVsKD_adjPval	Benjamini-Hochberg corrected p-value for the two-sample moderated t-test, rescue vs knockdown conditions
RescueVsKD_logFC	Log2-transformed change in mean abundance, rescue vs knockdown conditions
Spectra	The total number of identified MS/MS spectra for the protein subgroup across all conditions
Peptides	Count of distinct peptide sequences detected for the protein subgroup.
MolWeight	Calculated protein MW (Da) of the protein sequence
Coverage	Percent of the protein sequences that is covered by the peptides identified by MS/MS
Highlighting	Explanation
Dark red	Decreased-abundance hit, with criterion p < 0.05 for Knockdown vs Control
Light red	Decreased-abundance hit, with criteria p < 0.10 for Knockdown vs Control and p < 0.10 for Rescue vs Knockdown
Dark green	Increased-abundance hit, with criterion p < 0.05 for Knockdown vs Control
Light green	Decreased-abundance hit, with criteria p < 0.10 for Knockdown vs Control and p < 0.10 for Rescue vs Knockdown
Genes with different names between table and text/figures
Table	Text
UBA2	SAE2
COX4I1	COX4
FDFT1	SQS
MMGT1	EMC5

## Sheet: Results_MedNormed
UniprotID	Isoform	Symbol	Localization	s127N_Control	s127C_Control	s129C_Control	s129N_OE	s130C_OE	s132N_OE	s126C_KD	s131N_KD	s131C_KD	s128N_Rescue	s128C_Rescue	s130N_Rescue	OEvsControl_adjP	OEvsControl_logFC	KDvsControl_adjPval	KDvsControl_logFC	RescueVsKD_adjPval	RescueVsKD_logFC	Spectra	Peptides	MolWeight	Coverage
A0A024R4E5	A0A024R4E5	HDLBP	General	0.007	0.01	0.037	0.064	0.006	0.03	-0.077	-0.052	-0.059	-0.023	-0.009	0.0065	0.963397	0.0153333	0.0471543	-0.0806667	0.14946	0.0541667	232	103	142065	72.2
A0A024R644	A0A024R644	CLN5	General	-0.052	-0.053	-0.061	0.038	0.013	0.074	-0.106	-0.107	-0.031	0.09	0.164	0.1095	0.584955	0.097	0.53543	-0.026	0.0032307	0.2025	10	7	46794.7	19.1
A0A024RAC6	A0A024RAC6	ELOA	General	0.023	0.022	0.023	0.055	-0.053	0.015	-0.07	-0.02	-0.013	-0.051	0.018	-0.0015	0.966475	-0.017	0.14906	-0.057	0.603052	0.0228333	56	37	87627.7	41.1
A0A075B6F3	A0A075B6F3	DNAH8	General	0.127	-0.003	-0.198	-0.003	0.041	-0.191	0.009	-0.039	-0.112	-0.115	0.088	0.0925	0.985852	-0.0263333	0.842238	-0.0226667	0.385822	0.0691667	7	6	542407	1.9
A0A075B6F9	A0A075B6F9	NOSIP	General	-0.051	-0.056	-0.017	0.031	0.05	-0.04	0.1	0.141	0.134	-0.025	-0.138	0.0055	0.863756	0.055	0.00447436	0.166333	0.0113101	-0.1775	3	19	33944.1	74.3
A0A075B730	A0A075B730	EPPK1	General	0.185	0.056	0.049	0.122	-0.09	0.157	-0.216	-0.247	-0.056	0.021	-0.02	0.1235	0.972557	-0.0336667	0.0138767	-0.269667	0.0201754	0.2145	13	202	555575	43
A0A075B746	A0A075B746	MRPS21	General	0.042	0.069	-0.048	-0.057	-0.006	-0.084	0.147	0.127	0.075	-0.082	-0.079	-0.0155	0.851781	-0.07	0.100214	0.0953333	0.00511984	-0.175167	13	7	10916.6	65.5
A0A075B747	A0A075B747	BAHCC1	General	0.082	0.078	0.087	0.01	0.008	-0.038	0.044	0.097	0.075	-0.079	-0.115	0.0175	0.628784	-0.089	0.785495	-0.0103333	0.0319854	-0.130833	5	4	282807	1.8
A0A075B7D9	A0A075B7D9	TAF15	General	0.554	-0.188	0.216	0.302	-0.611	0.568	-0.263	-0.723	0.057	-0.342	-0.212	0.2985	0.982599	-0.107667	0.137558	-0.503667	0.424913	0.2245	7	26	49181	46.7
A0A075B7F8	A0A075B7F8	POM121C	General	-0.089	-0.032	0.019	0.055	0.001	0.041	0.076	-0.056	-0.011	-0.008	0.052	0.0445	0.83263	0.0663333	0.543212	0.037	0.625867	0.0265	45	28	125489	27.9
A0A075B7G2	A0A075B7G2	ZNF208	General	0.073	-0.082	-0.051	-0.158	-0.096	-0.138	0.317	0.216	-0.009	0.019	0.211	0.2345	0.805167	-0.110667	0.113396	0.194667	0.872211	-0.0198333	2	13	138614	7.6
A0A08711	A0A08711	GAGE13	General	-0.171	-0.033	-0.001	0.001	0.071	0.002	-0.07	0.117	-0.028	0.015	-0.046	0.0515	0.831386	0.093	0.386392	0.0746667	0.995063	0.0005	5	5	13127.7	43.5
A0A08719	A0A08719	CNTNAP3B	General	-0.695	0.16	0.655	0.404	-0.289	-0.098	0.071	0.453	0.398	-0.773	-0.328	-0.8175	0.997353	-0.0343333	0.528885	0.267333	0.00158239	-0.946833	3	3	133645	4.3
A0A08727	A0A08727	ZMIZ2	General	0.095	0.021	0.015	-0.02	-0.045	0.054	0.019	-0.028	-0.11	-0.011	0.074	-0.0365	0.896546	-0.0473333	0.162835	-0.0833333	0.406643	0.0485	7	13	97653.3	18.3
A0A08765	A0A08765	SRCIN1	General	0.016	0.061	-0.06	-0.017	-0.001	0.048	0.036	-0.005	0.034	0.03	0.098	0.0195	0.997353	0.00433333	0.760994	0.016	0.531563	0.0275	3	2	130746	1.2
A0A08769	A0A08769	PHF19	General	0.005	-0.051	-0.089	-0.013	-0.044	0.002	0.057	0.005	0.061	-0.034	-0.004	-0.0205	0.940308	0.0266667	0.0926621	0.086	0.139949	-0.0605	9	7	68957.5	9.5
A0A087I8	A0A087I8	ARMC9	General	0.038	-0.054	-0.089	-0.058	0.033	0.021	-0.035	-0.125	-0.185	0.087	0.004	0.0505	0.942978	0.0336667	0.247612	-0.08	0.0204415	0.162167	11	11	92558.7	14.1
A0A087K6	A0A087K6	KLF13	General	-0.016	0.068	0.033	0.049	0.001	0.113	-0.229	-0.122	-0.018	-0.007	0.013	-0.0125	0.950177	0.026	0.0698281	-0.151333	0.0912104	0.120833	17	12	31681	43
A0A087N7	A0A087N7	NEB	General	0.047	-0.137	-0.286	-0.047	0.029	0	-0.092	-0.104	-0.062	0.281	0.152	0.0235	0.885527	0.119333	0.715894	0.0393333	0.0147206	0.238167	13	9	994766	1.1
A0A087WSV8	A0A087WSV8	NUCB2	General	0.006	-0.048	-0.068	0.062	-0.003	0.039	-0.043	-0.002	-0.069	-0.028	0.02	0.0425	0.815969	0.0693333	0.97781	-0.00133333	0.262568	0.0495	53	31	50340.9	68.5
A0A087WT08	A0A087WT08	ZNF221	General	-0.06	-0.017	-0.213	-0.115	-0.032	0.048	0.011	0.008	0.199	0.055	0.02	0.1095	0.920152	0.0636667	0.099094	0.169333	0.886054	-0.0111667	3	10	73648.6	14.1
A0A087WT12	A0A087WT12	GPX4	General	0.179	-0.1	-0.092	-0.028	0.065	-0.004	-0.211	-0.247	-0.322	0.267	0.141	0.2955	0.988493	0.0153333	0.0392676	-0.255667	0.000232458	0.4945	33	16	27575.3	55.7
A0A087WT20	A0A087WT20	DCAF13	General	0.025	0.003	-0.033	-0.035	-0.033	0.02	0.011	0.014	0.072	-0.008	0.051	0.0025	0.971904	-0.0143333	0.424584	0.034	0.698721	-0.0171667	63	34	68405.8	49.2
A0A087WT23	A0A087WT23	UBXN8	General	-0.054	-0.027	-0.037	-0.047	0.039	-0.028	0.048	-0.013	-0.016	0.023	0.15	0.0655	0.937011	0.0273333	0.262884	0.0456667	0.177351	0.0731667	11	10	35640.2	35.8
A0A087WT67	A0A087WT67	ZNF195	General	0.007	-0.028	-0.006	-0.04	-0.034	-0.033	0.09	0.054	0.049	0.038	0.023	0.0175	0.91589	-0.0266667	0.0733456	0.0733333	0.306764	-0.0381667	13	19	74940.2	23.6
A0A087WTU7	A0A087WTU7	DMD	General	0.063	-0.05	0.013	-0.08	-0.053	0.008	0.149	-0.052	-0.089	0.124	-0.034	0.0285	0.892588	-0.0503333	0.94962	-0.006	0.686372	0.0368333	10	37	428951	10.9
A0A087WTW0	A0A087WTW0	UHRF1	General	-0.013	0.018	0.02	-0.038	-0.125	-0.046	0.181	0.222	0.321	-0.075	-0.006	-0.0355	0.805167	-0.078	0.00527967	0.233	0.00158845	-0.280167	118	59	98273.4	69.1
A0A087WU02	A0A087WU02	ERGIC2	General	-0.078	0.004	-0.035	0	0.078	-0.12	0.076	0.137	0.006	0.029	0.082	0.0645	0.972912	0.0223333	0.0787021	0.109333	0.788678	-0.0145	12	9	43716.8	24
A0A087WU53	A0A087WU53	MAGT1	Endoplasmic Reticulum	-0.153	-0.007	0.035	0.064	0.113	-0.023	0.079	-0.037	-0.16	0.051	0.103	-0.0375	0.875329	0.093	0.982488	0.00233333	0.344358	0.0781667	13	7	41987.5	17.7
A0A087WUB9	A0A087WUB9	CTNNBL1	General	-0.071	-0.021	0.006	0.011	-0.021	0	0.054	0.092	0.114	-0.037	-0.037	0.0045	0.940058	0.0253333	0.0306176	0.115333	0.0229937	-0.109833	65	33	66158.3	47.8
A0A087WUD1	A0A087WUD1	ZNF787	General	0.006	0.017	-0.055	0.008	-0.013	0.046	-0.057	-0.094	0.056	-0.067	0.031	0.0895	0.943258	0.0243333	0.740393	-0.021	0.477135	0.0495	28	18	41454.6	57
A0A087WUW9	A0A087WUW9	ARL15	General	-0.109	0.081	0.002	-0.003	0.194	-0.031	-0.104	0.005	-0.008	-0.008	-0.009	-0.0805	0.939703	0.062	0.725664	-0.027	0.953851	0.00316667	5	4	23275.2	25
A0A087WV53	A0A087WV53	SPEG	General	0.09	0.873	0.016	0.892	-0.076	-0.253	-0.061	0.683	0.762	-0.263	-0.322	-0.4305	0.97357	-0.138667	0.738192	0.135	0.012138	-0.799833	6	2	26246.2	5.4
A0A087WV86	A0A087WV86	BORA	General	-0.015	-0.025	0.014	0.033	-0.025	0.182	0.011	0.063	0.063	-0.029	-0.143	0.0335	0.886515	0.072	0.182059	0.0543333	0.149774	-0.0918333	5	5	69923.5	12.1
A0A087WVC6	A0A087WVC6	PTPRJ	General	-0.076	-0.079	-0.122	-0.035	0.093	-0.116	0.101	0.086	-0.009	0.023	0.137	0.0895	0.886515	0.073	0.0188765	0.151667	0.682454	0.0238333	28	20	147811	16.6
A0A087WVP1	A0A087WVP1	FAT1	General	-0.068	-0.075	-0.067	-0.024	-0.002	-0.032	0.36	0.326	0.323	0.009	0.046	0.0195	0.816946	0.0506667	0.000102617	0.406333	0.000169843	-0.3115	112	90	509794	24.7
A0A087WVQ6	A0A087WVQ6	CLTC	General	-0.01	-0.02	-0.024	0.014	0.011	0.037	-0.06	-0.023	-0.043	0.05	0.065	0.0265	0.879726	0.0386667	0.493074	-0.024	0.0378488	0.0891667	412	128	193823	69.6
A0A087WVU4	A0A087WVU4	NBPF14	General	0.064	-0.039	-0.063	-0.122	-0.051	0.033	0.161	0.244	0.263	0.02	-0.022	-0.0845	0.950865	-0.034	0.00741732	0.235333	0.00225121	-0.2515	4	4	349224	1.9
A0A087WW63	A0A087WW63	CACNA1A	General	0.202	-0.538	-0.796	-0.718	0.066	-0.109	0.212	-0.086	-0.511	0.557	0.232	0.3975	0.972912	0.123667	0.509161	0.249	0.0356437	0.523833	6	3	284724	1.7
A0A087WW66	A0A087WW66	PSMD1	General	0.019	-0.042	-0.001	0.01	-0.01	0.014	0.006	-0.026	-0.029	-0.015	0.031	0.0185	0.972557	0.0126667	0.839796	-0.00833333	0.471307	0.0278333	184	67	106876	68.5
A0A087WW83	A0A087WW83	GPR179	General	0.153	-0.044	0	-0.074	0.029	0.028	-0.081	-0.124	-0.086	0.161	0.018	0.0225	0.944801	-0.042	0.0861315	-0.133333	0.01857	0.164167	5	4	260850	1.4
A0A087WWL5	A0A087WWL5	ZSWIM9	General	0.023	0.065	0.008	-0.044	0.014	0.031	-0.036	-0.022	0.045	0.033	0.021	-0.0415	0.920863	-0.0316667	0.423963	-0.0363333	0.865806	0.0085	5	5	103049	4.4
A0A087WWM1	A0A087WWM1	MUC1	General	-0.122	0.002	-0.312	-0.264	-0.022	-0.128	0.089	0.018	0.049	0.223	0.153	0.1265	0.997735	0.006	0.0797729	0.196	0.035644	0.1155	3	2	123184	1.7
A0A087WWT0	A0A087WWT0	JPH4	General	-0.007	0.044	0.014	-0.022	0.031	-0.008	0.176	0.007	0.01	-0.046	-0.144	-0.0795	0.958527	-0.0166667	0.486342	0.0473333	0.0444618	-0.154167	3	3	66450.1	5.8
A0A087WWW9	A0A087WWW9	BCL10	General	0.06	0.022	0.085	0.091	0.042	0.181	-0.095	-0.045	-0.065	-0.097	-0.121	0.0395	0.902192	0.049	0.0177998	-0.124	0.890374	0.00883333	2	10	18187.2	58.3
A0A087WWZ6	A0A087WWZ6	PRDM11	General	-0.049	0.056	0.062	0.037	-0.038	-0.111	0.025	0.138	0.065	-0.105	-0.025	-0.1105	0.896546	-0.0603333	0.380487	0.053	0.0167323	-0.156167	8	7	135856	6.3
A0A087WX23	A0A087WX23	PEG10	General	0.051	0.065	0.044	0.081	0.063	0.053	-0.411	-0.411	-0.448	0.064	0.028	0.0205	0.966475	0.0123333	6.46e-05	-0.476667	3.18e-05	0.460833	57	30	88893	49.5
A0A087WX45	A0A087WX45	IQCE	General	0.179	-0.11	-0.372	0.028	-0.104	0.114	-0.121	-0.197	-0.519	0.233	0.021	0.1645	0.939703	0.113667	0.396172	-0.178	0.0125421	0.4185	2	2	78569.7	1.9
A0A087WX92	A0A087WX92	SLC16A6	General	-0.082	0.017	-0.039	-0.02	0.124	-0.143	0.771	0.687	0.629	-0.112	-0.088	-0.1555	0.985612	0.0216667	9.07e-05	0.730333	1.29e-05	-0.814167	8	6	58178.4	12.6
A0A087WXF8	A0A087WXF8	ZCCHC17	General	-0.049	-0.024	0.037	0.023	-0.013	-0.012	0.046	0.02	0.069	-0.059	-0.031	-0.0245	0.980458	0.0113333	0.213005	0.057	0.0517918	-0.0831667	19	10	30030.8	34.6
A0A087WXK5	A0A087WXK5	ABCA2	General	0.014	0.166	0.125	0.037	0.108	0.005	-0.139	-0.234	-0.262	-0.007	0.052	-0.0985	0.91589	-0.0516667	0.00400725	-0.313333	0.0147652	0.193833	25	22	275399	10.7
A0A087WXL3	A0A087WXL3	POLQ	General	0.021	0.067	0.025	0.059	-0.073	-0.018	0.027	0.056	0.088	-0.128	-0.035	-0.0755	0.896546	-0.0483333	0.637667	0.0193333	0.0159538	-0.1365	22	16	308478	7.1
A0A087WY96	A0A087WY96	SLC6A6	General	-0.145	0.071	-0.045	-0.135	0.059	-0.331	0.525	0.224	0.11	-0.105	0.074	-0.0845	0.924508	-0.096	0.0514874	0.326	0.0328015	-0.324833	5	4	82592.8	6.1
A0A087WYC6	A0A087WYC6	DNAH11	General	-0.11	-0.091	-0.048	-0.031	0.034	-0.003	0.213	0.116	0.16	-0.005	-0.008	0.0135	0.746041	0.083	0.00245166	0.246	0.00643866	-0.162833	10	8	525212	1.7
A0A087WYD6	A0A087WYD6	TAP2	General	-0.045	-0.019	0.008	-0.005	0.014	-0.055	0.335	0.258	0.2	-0.091	-0.026	-0.0505	0.997353	0.00333333	0.00238014	0.283	0.000735862	-0.320167	29	19	78166.1	31
A0A087WYF0	A0A087WYF0	ZCCHC17	General	0.029	-0.078	-0.087	-0.089	0.023	0.161	-0.027	-0.054	-0.208	0.137	-0.007	0.0295	0.90623	0.077	0.507537	-0.051	0.0669491	0.1495	4	4	18404	25
A0A087WYF7	A0A087WYF7	APOOL	General	-0.149	0.08	-0.068	0.056	0.162	-0.132	-0.069	-0.13	-0.157	0.144	-0.012	0.0905	0.939565	0.0743333	0.369547	-0.073	0.0117909	0.192833	10	8	29375.6	37.3
A0A087WYL5	A0A087WYL5	SEZ6L2	General	-0.105	0.074	-0.046	0.028	0.025	-0.04	-0.011	0.031	0.02	0.013	0.051	-0.0565	0.95599	0.03	0.546291	0.039	0.828438	-0.0108333	6	5	100672	5.6
A0A087WYL7	A0A087WYL7	MED6	General	-0.022	-0.05	0.019	-0.046	-0.04	0	0.135	0.165	0.153	0.014	-0.05	-0.0375	0.978387	-0.011	0.00527967	0.168667	0.00308148	-0.1755	18	11	29852.8	45.9
A0A087WYM3	A0A087WYM3	SIRT2	General	0.172	0.026	0	-0.039	0	-0.025	-0.095	0.005	-0.007	0.076	0.031	0.0405	0.835164	-0.0873333	0.186261	-0.0983333	0.103723	0.0815	12	11	43985	33.6
A0A087WYN9	A0A087WYN9	DHX29	General	0.023	-0.015	-0.005	0.001	-0.003	-0.004	0.021	0.013	-0.049	0.026	0.037	-0.0005	0.996126	-0.003	0.8931	-0.006	0.540612	0.0258333	145	91	156373	63.7
A0A087WYV9	A0A087WYV9	SYNJ2BP-CO6	General	-0.03	0.053	-0.001	0.06	0.082	-0.01	0.067	-0.047	-0.036	-0.013	0.045	-0.0285	0.920152	0.0366667	0.827623	-0.0126667	0.909131	0.0065	19	13	20526.7	68.1
A0A087WYZ4	A0A087WYZ4	CGA	General	-0.249	-0.358	-0.318	-0.04	-0.018	-0.051	1.342	1.357	1.267	0.108	0.048	0.0745	0.130166	0.272	6.23e-06	1.63033	1.35e-06	-1.24517	19	5	16876.1	48.2
A0A087WZM2	A0A087WZM2	RNASET2	General	-0.061	0.002	-0.025	0.043	0.017	0.05	-0.011	-0.002	0.006	-0.13	0.008	-0.0315	0.805167	0.0646667	0.502717	0.0256667	0.347002	-0.0488333	8	6	35667	18.6
A0A087WZN1	A0A087WZN1	IDH3B	General	-0.054	-0.067	-0.17	-0.063	-0.001	-0.173	0.194	0.31	0.359	0.046	-0.041	0.0395	0.982599	0.018	0.00205256	0.384667	0.00323475	-0.272833	45	21	42695.5	47.8
A0A087WZQ7	A0A087WZQ7	NAPB	General	0.042	-0.017	0.006	0.079	0.017	-0.005	-0.095	-0.052	-0.041	0.063	0.04	0.0645	0.955362	0.02	0.0991539	-0.073	0.0141727	0.1185	6	10	34259	35.4
A0A087WZV0	A0A087WZV0	PPIP5K2	General	0.076	0.031	0.04	0.046	0.01	0.037	-0.12	-0.118	-0.107	-0.007	-0.005	0.0485	0.949297	-0.018	0.00403535	-0.164	0.0108335	0.127167	58	45	145672	37.8
A0A087WZY3	A0A087WZY3	ALMS1	General	-0.036	-0.01	-0.028	0.022	-0.017	0.015	0.041	0.091	0.085	0.007	-0.065	-0.0455	0.900608	0.0313333	0.0318287	0.097	0.031251	-0.106833	32	26	463450	6.9
A0A087X020	A0A087X020	SBDS	General	0.042	-0.08	-0.009	-0.022	-0.019	-0.065	0.041	0.095	0.074	-0.03	-0.048	0.0525	0.966475	-0.0196667	0.118729	0.0856667	0.116215	-0.0785	67	27	29149.4	77.6
A0A087X080	A0A087X080	RYR3	General	-0.006	0.048	0.009	-0.098	-0.002	0.049	0.109	-0.03	0.027	0.048	0.027	0.0415	0.940308	-0.034	0.748574	0.0183333	0.948583	0.0035	12	10	558560	2.1
A0A087X0F7	A0A087X0F7	RIBC2	General	0.061	-0.077	-0.178	-0.081	0.102	0.068	0.026	-0.042	-0.231	0.058	0.1	0.0925	0.889251	0.0943333	0.881972	-0.0176667	0.0611777	0.165833	3	3	45711.6	11.7
A0A087X0M4	A0A087X0M4	SLC4A1AP	General	-0.031	-0.02	-0.006	0.041	-0.033	0.009	-0.033	0.018	0.024	-0.043	-0.017	-0.0135	0.939703	0.0246667	0.568871	0.022	0.489347	-0.0275	60	38	83630.7	48.9
A0A087X0N3	A0A087X0N3	NOL4L	General	-0.017	-0.02	0.062	-0.006	-0.064	-0.05	0.044	-0.009	0.096	-0.123	-0.094	-0.0425	0.886082	-0.0483333	0.506151	0.0353333	0.0266941	-0.130167	8	7	74736.6	10.5
A0A087X0R0	A0A087X0R0	KDM6A	General	-0.032	-0.004	0.016	-0.012	-0.038	-0.01	-0.113	0.047	0.112	-0.021	-0.048	-0.1005	0.966475	-0.0133333	0.784465	0.022	0.336738	-0.0718333	9	8	159358	7
A0A087X0R6	A0A087X0R6	SN2	General	0.069	0.002	0.048	0.065	0.032	-0.005	-0.103	-0.088	-0.175	-0.022	-0.073	0.0255	0.985852	-0.009	0.0118018	-0.161667	0.0709649	0.0988333	43	18	20053.4	78.4
A0A087X0S4	A0A087X0S4	KLF4	General	-0.099	0.054	0.195	0.213	-0.016	0.229	-0.715	-0.429	-0.383	-0.082	-0.05	0.0085	0.920152	0.092	0.00687776	-0.559	0.00295394	0.467833	5	6	16947.9	58.6
A0A087X0T3	A0A087X0T3	MYH7B	General	0.456	0.005	0	0.316	-0.325	0.603	-0.625	-0.473	-0.076	0.097	-0.087	0.2625	0.989839	0.0443333	0.0434546	-0.545	0.025627	0.482167	5	6	226965	2.7
A0A087X0V5	A0A087X0V5	OAS2	General	-0.115	0.151	0.115	0.017	-0.177	-0.164	0.103	0.303	0.191	-0.082	0.031	-0.0835	0.831386	-0.158333	0.188856	0.148667	0.0101984	-0.243833	2	2	84203.8	2.3
A0A087X0W7	A0A087X0W7	ACOT2	General	0.039	0.046	-0.054	-0.035	-0.013	-0.009	0.015	0.024	0.097	-0.036	-0.089	-0.0315	0.939703	-0.0293333	0.514779	0.035	0.0542593	-0.0975	47	25	46690.9	78.8
A0A087X256	A0A087X256	WASHC4	General	0.018	0.008	-0.016	0.007	0.038	0.032	-0.115	-0.105	-0.204	0.057	0.065	0.0195	0.937011	0.0223333	0.0174922	-0.144667	0.00468311	0.1885	58	43	137527	36.5
A0A087X266	A0A087X266	TMEM120A	General	-0.335	0.048	0.075	0.114	0.15	-0.016	0.034	-0.202	-0.161	-0.185	0.083	-0.2765	0.886515	0.153333	0.81322	-0.039	0.903259	-0.0165	9	9	43690.8	25.4
A0A087X279	A0A087X279	IFIT2	General	0.374	0.08	0.165	-0.196	-0.203	-0.293	1.44	1.469	1.38	-0.166	-0.248	0.0305	0.235126	-0.437	8.47e-05	1.22333	6.29e-06	-1.5575	17	13	56782.6	26.2
A0A087X2A7	A0A087X2A7	FAM184A	General	-0.059	-0.033	0.023	0.009	-0.06	-0.039	0.252	0.192	0.205	-0.037	0.018	-0.1005	0.98803	-0.007	0.00225408	0.239333	0.00152885	-0.256167	7	6	128720	3.3
A0A087X2F1	A0A087X2F1	ZSCAN26	General	-0.005	-0.02	-0.164	-0.048	0.016	0.056	-0.025	-0.029	-0.038	0.077	0.026	0.0475	0.886235	0.071	0.604112	0.0323333	0.0526446	0.0808333	18	11	40837.4	32.2
A0A087X2I1	A0A087X2I1	PSMC6	General	0.009	-0.022	0.006	0.029	-0.014	0.001	-0.066	-0.027	-0.003	0.003	0.009	0.0385	0.985852	0.00766667	0.45144	-0.0296667	0.229367	0.0488333	99	37	46081.5	75.9
A0A087Z3	A0A087Z3	PSME2	General	0.023	0.036	0.045	-0.036	0.019	-0.033	0.004	-0.025	-0.067	0.029	-0.033	-0.0495	0.831386	-0.0513333	0.127282	-0.064	0.811425	0.0115	51	26	29297.3	74
A0A088AWN2	A0A088AWN2	WDR20	General	0.044	-0.109	-0.195	-0.143	0.007	-0.048	-0.039	0.034	-0.065	0.039	0.079	0.0995	0.977806	0.0253333	0.456353	0.0633333	0.0645175	0.0958333	5	4	68387.6	8.4
A0A096LP01	A0A096LP01	SMIM26	General	0.125	0.097	-0.034	0.048	0.092	0.011	-0.109	-0.361	-0.362	0.066	0.084	0.1115	0.9867	-0.0123333	0.0143971	-0.34	0.0036898	0.3645	2	2	10908	15.7
A0A096LPC5	A0A096LPC5	WASHC2C	General	0.033	0.051	0.077	0.057	0.017	0.123	-0.207	-0.153	-0.234	0.045	-0.027	0.0815	0.982579	0.012	0.001537	-0.251667	0.00259573	0.231167	19	50	147322	53.9
A0A096LPH6	A0A096LPH6	ZNF638	General	-0.031	-0.03	-0.149	-0.118	-0.038	0.116	-0.111	-0.044	-0.034	0.143	0.093	0.0485	0.937011	0.0566667	0.911986	0.007	0.0112135	0.157833	4	35	104675	42.8
A0A0A0MQ	A0A0A0MQ	MYO10	General	0.121	0.075	0.019	0.003	0.032	0.015	-0.166	-0.23	-0.293	0.069	0.051	0.0505	0.866206	-0.055	0.00247253	-0.301333	0.00081847	0.2865	86	67	240510	33.4
A0A0A0MQR2	A0A0A0MQR2	RTFDC1	General	0.068	-0.014	-0.002	0.059	0.006	0.063	-0.141	-0.152	-0.137	0.028	0.053	0.0955	0.943802	0.0253333	0.00785493	-0.160667	0.00151816	0.202167	29	18	38272.8	47.6
A0A0A0MQS1	A0A0A0MQS1	PYCR3	General	-0.039	0.006	0.029	0.086	-0.02	-0.032	0.013	0.083	0.119	-0.071	-0.106	-0.0565	0.985852	0.0126667	0.163255	0.073	0.0124972	-0.1495	29	14	30405.6	56.6
A0A0A0MQS2	A0A0A0MQS2	CLASRP	General	-0.044	0.001	0.029	0.031	-0.056	-0.002	-0.031	0.034	0.137	-0.141	-0.067	-0.0515	0.996126	-0.00433333	0.423807	0.0513333	0.0555557	-0.133167	29	19	77332.1	33.5
A0A0A0MQS6	A0A0A0MQS6	CDH23	General	-0.044	-0.031	0.074	0.169	-0.097	-0.025	-0.01	0.073	0.083	-0.052	-0.087	-0.0625	0.98803	0.016	0.407707	0.049	0.0288489	-0.115833	4	3	370671	0.6
A0A0A0MQU4	A0A0A0MQU4	SCLY	General	-0.026	0.025	0.048	0.079	0.08	0.054	-0.142	-0.096	-0.115	0.038	0.047	-0.0045	0.831386	0.0553333	0.0154421	-0.133333	0.00698818	0.1445	28	21	49077.9	63.7
A0A0A0MQX8	A0A0A0MQX8	MBNL1	General	-0.016	-0.004	0.023	0.035	-0.097	0.015	-0.041	-0.026	0.066	-0.099	-0.05	-0.0285	0.972912	-0.0166667	0.979492	-0.00133333	0.250032	-0.0588333	36	16	43776.7	45
A0A0A0MR	A0A0A0MR	ELAVL2	General	0.086	-0.055	-0.099	-0.054	0.08	0.058	-0.162	-0.105	-0.133	0.071	0.063	0.0915	0.937011	0.0506667	0.125837	-0.110667	0.0012066	0.2085	17	17	42974.1	48.3
A0A0A0MR51	A0A0A0MR51	FADS1	General	-0.06	0.064	0.095	0.028	0.037	-0.017	0.055	-0.045	-0.024	-0.173	-0.015	-0.0655	0.977806	-0.017	0.572353	-0.0376667	0.209301	-0.0798333	23	15	58227.3	27.5
A0A0A0MR57	A0A0A0MR57	ZNF836	General	-0.253	-0.016	0.056	-0.101	0.158	-0.123	0.451	0.396	0.281	-0.264	-0.067	-0.1105	0.971904	0.049	0.00697064	0.447	0.000510016	-0.523167	2	9	111150	7.2
A0A0A0MR66	A0A0A0MR66	RBM10	General	-0.018	-0.006	0.018	0.023	-0.051	-0.016	0.026	-0.004	0.057	-0.058	-0.005	-0.0605	0.972912	-0.0126667	0.469859	0.0283333	0.124852	-0.0675	96	51	110706	49
A0A0A0MR74	A0A0A0MR74	DGAT1	General	0.122	-0.002	-0.004	0.154	-0.04	0.136	-0.25	-0.224	-0.033	0.022	-0.033	0.0975	0.944801	0.0446667	0.0442004	-0.207667	0.0336633	0.197833	3	3	33871.2	16.5
A0A0A0MR85	A0A0A0MR85	GSTM4	General	0.202	0.011	-0.052	-0.228	-0.043	-0.144	0.286	0.437	0.294	0.062	-0.078	0.1135	0.780769	-0.192	0.021417	0.285333	0.00509245	-0.3065	6	6	25791.1	31.6
A0A0A0MRC0	A0A0A0MRC0	DCHS2	General	0.027	0.024	-0.018	-0.006	0.052	-0.185	0.189	-0.003	-0.083	-0.13	-0.044	-0.0195	0.924508	-0.0573333	0.803535	0.0233333	0.269275	-0.0988333	3	3	149929	3.9
A0A0A0MRE9	A0A0A0MRE9	AKAP9	General	0.086	0.022	0.106	0.07	-0.025	0.147	-0.18	-0.247	-0.107	0.065	0.058	0.0985	0.993775	-0.00733333	0.00533504	-0.249333	0.0020603	0.251833	3	152	364455	50.3
A0A0A0MRJ7	A0A0A0MRJ7	F5	General	-0.046	-0.159	-0.092	-0.104	-0.033	-0.341	1.638	1.711	1.416	0.048	0.138	0.0775	0.943258	-0.0603333	3.24e-05	1.68733	9.07e-06	-1.5005	24	15	253372	6.3
A0A0A0MRN1	A0A0A0MRN1	HENMT1	General	0.005	-0.019	0.035	-0.025	-0.007	-0.15	0.324	0.267	0.278	-0.107	-0.133	-0.0435	0.880682	-0.0676667	0.000759249	0.282667	0.000154776	-0.384167	11	10	48664.7	27.1
A0A0A0MRP2	A0A0A0MRP2	FPGT	General	0.088	-0.002	0.01	0.012	0.08	0.069	-0.124	-0.111	-0.288	0.066	0.058	0.0145	0.955362	0.0216667	0.0233374	-0.206333	0.0095218	0.2205	24	20	68978.2	41
A0A0A0MRR7	A0A0A0MRR7	SNRPC	General	0.015	-0.013	0.011	0.055	-0.015	-0.086	0.088	0.001	0.022	-0.06	-0.035	0.0665	0.967397	-0.0196667	0.454024	0.0326667	0.404297	-0.0465	9	3	19915.2	21.6
A0A0A0MS24	A0A0A0MS24	PPP1R12B	General	-0.01	0.031	-0.029	0.04	-0.036	0.074	0.01	-0.031	0.048	0.014	0.027	0.0165	0.942978	0.0286667	0.799864	0.0116667	0.814433	0.0101667	11	13	117016	13.1
A0A0A0MS69	A0A0A0MS69	PDE1C	General	0.086	0.084	-0.189	-0.113	0.193	-0.113	-0.098	-0.158	-0.117	0.136	0.255	0.0275	0.997839	-0.00466667	0.251732	-0.118	0.00692696	0.263833	3	4	87208.9	4.1
A0A0A0MSA3	A0A0A0MSA3	MAGEB16	General	-0.013	0.006	-0.024	-0.01	0.068	-0.04	-0.009	-0.043	-0.026	0.015	-0.002	0.0075	0.972557	0.0163333	0.665803	-0.0156667	0.36537	0.0328333	6	3	39969.9	7.5
A0A0A0MSF9	A0A0A0MSF9	GPATCH11	General	-0.016	-0.022	-0.006	0.044	-0.004	0.013	-0.002	0.035	0.015	-0.068	-0.041	-0.0215	0.895935	0.0323333	0.383758	0.0306667	0.135525	-0.0595	26	17	33562	50.8
A0A0A0MSG2	A0A0A0MSG2	FHL2	General	0.085	0.057	0.129	0.044	0.002	0.01	-0.12	-0.12	-0.206	-0.029	0.035	0.0505	0.805167	-0.0716667	0.00311202	-0.239	0.00937423	0.1675	56	27	47062.8	62
A0A0A0MSJ9	A0A0A0MSJ9	RASA2	General	0.073	0.015	0.02	-0.018	0.028	0.039	-0.093	-0.078	-0.094	0.058	-0.003	0.0355	0.951849	-0.0196667	0.0141919	-0.124333	0.014355	0.1185	28	22	98367.2	26.2
A0A0A0MSK2	A0A0A0MSK2	PET100	General	0.083	0.043	0.039	0.047	-0.016	-0.081	0.007	-0.065	0.008	-0.038	-0.02	-0.0735	0.831386	-0.0716667	0.122255	-0.0716667	0.54117	-0.0271667	5	4	5553.3	54.5
A0A0A0MSK4	A0A0A0MSK4	GPSM1	General	0.062	0.042	0.14	0.036	-0.035	-0.014	-0.062	-0.018	-0.015	-0.051	-0.068	-0.0745	0.805167	-0.0856667	0.0425387	-0.113	0.388562	-0.0328333	20	18	75108.5	35.7
A0A0A0MSS8	A0A0A0MSS8	AKR1C3	General	-0.006	-0.041	0.012	-0.07	-0.068	-0.044	-0.049	0.874	0.578	0.076	-0.059	0.0715	0.834494	-0.049	0.111933	0.479333	0.10993	-0.438167	3	3	37266	10.2
A0A0A0MSW5	A0A0A0MSW5	ZNF778	General	0.027	0.049	-0.032	-0.003	-0.112	-0.018	0.017	0.125	0.365	-0.053	-0.085	-0.1415	0.885527	-0.059	0.188699	0.154333	0.0313112	-0.262167	3	10	88273.7	10.7
A0A0A0MT33	A0A0A0MT33	SCAF8	General	-0.017	-0.004	0.003	0.003	-0.028	-0.004	0.025	0.022	0.065	-0.059	0.005	-0.0365	0.993775	-0.00366667	0.242981	0.0433333	0.117339	-0.0675	67	43	149313	34.4
A0A0A0MT49	A0A0A0MT49	SMARCA4	General	-0.107	0.067	-0.026	-0.124	-0.066	-0.079	0.151	0.164	0.179	0.06	-0.078	-0.1415	0.886082	-0.0676667	0.0182778	0.186667	0.0104725	-0.217833	2	77	189485	41.3
A0A0A0MT72	A0A0A0MT72	CCM2	General	-0.04	0.067	-0.12	0.095	-0.071	0.011	-0.162	-0.185	0.054	0.039	-0.101	0.1325	0.947382	0.0426667	0.511324	-0.0666667	0.237523	0.121167	2	2	48650.5	5
A0A0A0MT77	A0A0A0MT77	DNAJC24	General	0.026	-0.057	0.028	-0.026	0.061	-0.011	0.001	-0.094	0.046	-0.044	-0.112	0.0535	0.9867	0.009	0.817457	-0.0146667	0.797506	-0.0185	3	3	17481.3	28.8
A0A0A0MT83	A0A0A0MT83	IVD	General	0.028	0.02	-0.139	-0.036	0.011	-0.019	0.128	0.102	0.162	-0.028	-0.095	-0.0505	0.985612	0.0156667	0.0412212	0.161	0.00290752	-0.1885	44	20	47163.5	50.9
A0A0A0MTH3	A0A0A0MTH3	ILK	General	0.04	-0.022	0.06	0.027	-0.008	-0.006	0.008	0.006	-0.038	-0.003	-0.043	-0.0115	0.948255	-0.0216667	0.444451	-0.034	0.784912	-0.0111667	68	28	55295.7	55
A0A0A0MTH9	A0A0A0MTH9	BTAF1	General	0.015	-0.01	-0.03	-0.009	-0.007	0.017	-0.031	-0.013	-0.044	0.052	0.056	0.0455	0.982686	0.00866667	0.568194	-0.021	0.0455517	0.0805	119	78	209212	47.9
A0A0A0MTJ9	A0A0A0MTJ9	NCEH1	General	-0.017	0	0.061	0.009	0.025	0.02	0.032	-0.106	-0.139	-0.115	0.079	0.0285	0.997353	0.00333333	0.217155	-0.0856667	0.39682	0.0685	29	16	50279.8	43.3
A0A0A0MTL5	A0A0A0MTL5	SKP2	General	0.093	-0.022	-0.014	-0.025	-0.007	0.022	-0.021	-0.009	-0.088	-0.013	0	0.0095	0.958527	-0.0223333	0.304669	-0.0583333	0.365093	0.0381667	25	14	49683.1	41.1
A0A0A0MTQ8	A0A0A0MTQ8	CCDC175	General	0.017	-0.024	-0.081	-0.057	-0.026	0.036	0.115	-0.031	-0.038	0.068	0.111	-0.0075	0.980458	0.0136667	0.508732	0.0446667	0.533903	0.0418333	6	5	97868.5	4.8
A0A0A0MTR7	A0A0A0MTR7	RNF213	General	-0.006	-0.024	-0.037	-0.024	0.015	-0.003	0.022	0.028	-0.033	0.074	0.099	-0.0265	0.946133	0.0183333	0.480093	0.028	0.416035	0.0431667	339	233	598929	48.1
A0A0A6YY96	A0A0A6YY96	IREB2	General	0.054	-0.035	0.014	-0.034	-0.059	-0.046	0.184	0.238	0.168	-0.03	-0.083	-0.0385	0.83313	-0.0573333	0.00709716	0.185667	0.000864204	-0.247167	47	35	106084	41.5
A0A0B4J1S3	A0A0B4J1S3	BIRC5	General	-0.041	-0.04	0.009	-0.008	-0.089	0.008	0.383	0.413	0.454	-0.079	-0.071	-0.0155	0.991698	-0.00566667	0.000162776	0.440667	4.89e-05	-0.471833	14	7	16731.7	64
A0A0B4J1S4	A0A0B4J1S4	SELENOF	General	-0.031	0.066	0.017	0.027	0.026	-0.038	0.027	-0.057	-0.114	0.016	0.103	0.0245	0.982579	-0.0123333	0.286829	-0.0653333	0.115026	0.0958333	13	7	18558.1	36.9
A0A0B4J1T8	A0A0B4J1T8	EPHA6	General	-0.014	-0.017	-0.085	-0.167	0.024	0.04	-0.074	-0.069	0.029	0.153	0.058	0.1205	0.997735	0.00433333	0.991307	0.000666667	0.0210498	0.1485	2	5	128328	5.1
A0A0B4J1W0	A0A0B4J1W0	MED24	General	-0.024	-0.034	-0.067	-0.044	-0.013	0.025	0.092	0.065	0.047	-0.003	0.068	-0.0235	0.919638	0.031	0.02136	0.109667	0.234635	-0.0541667	59	38	114494	49
A0A0B4J1Y2	A0A0B4J1Y2	TTC21A	General	0.007	-0.134	-0.332	-0.138	0.001	0.018	0.291	0.266	-0.042	0.191	0.07	0.0175	0.890021	0.113333	0.0600396	0.324667	0.500423	-0.0788333	4	4	131110	3.8
A0A0B4J220	A0A0B4J220	C11orf98	General	-0.01	0.058	0.119	0.098	0.009	-0.015	-0.053	-0.045	-0.077	-0.091	0.025	-0.0485	0.965012	-0.025	0.0525197	-0.114	0.682454	0.0201667	20	7	14233.5	41.4
A0A0B4J291	A0A0B4J291	CDYL2	General	-0.046	-0.083	-0.095	-0.045	-0.063	-0.009	0.229	0.197	0.228	-0.017	0.109	0.0325	0.895935	0.0356667	0.000475757	0.292667	0.00770649	-0.1765	35	25	57241.1	42.4
A0A0B4J294	A0A0B4J294	TRAPPC2L	General	0.132	-0.072	-0.022	-0.022	-0.011	-0.062	0.028	0.073	0.019	-0.052	-0.046	0.0845	0.940308	-0.0443333	0.716485	0.0273333	0.430015	-0.0445	14	9	16847.1	59.5
A0A0B4J2A0	A0A0B4J2A0		General	-0.049	0.007	0.015	-0.037	-0.003	0.065	-0.027	0.087	0.109	-0.021	-0.068	-0.0245	0.971904	0.0173333	0.269074	0.0653333	0.102177	-0.0941667	12	10	51960.4	33.4
A0A0B4J2B3	A0A0B4J2B3	NBPF14	General	-0.008	0.001	0.036	-0.041	-0.054	0.039	-0.104	0.049	0.102	-0.065	-0.086	-0.0315	0.940308	-0.0283333	0.939042	0.006	0.270766	-0.0765	3	6	29298	25.3
A0A0B4J2C3	A0A0B4J2C3	TPT1	General	-0.01	-0.082	0.022	0	-0.036	-0.023	0.064	0.048	0.044	-0.005	-0.067	-0.0005	0.997353	0.00366667	0.12323	0.0753333	0.0807903	-0.0761667	67	14	22801.7	83.2
A0A0B4J2E5	A0A0B4J2E5	LOC102724159	General	0.004	0.014	-0.013	-0.042	-0.062	-0.041	0.121	0.134	0.12	-0.043	0.101	-0.0515	0.82075	-0.05	0.00954875	0.123333	0.0553413	-0.122833	67	36	103419	40.6
A0A0C4DFL7	A0A0C4DFL7	CYP51A1	Endoplasmic Reticulum	-0.071	-0.008	0.024	-0.028	0.006	-0.016	0.224	0.097	0.094	-0.195	-0.049	-0.1115	0.990559	0.00566667	0.0344157	0.156667	0.00519597	-0.256833	30	18	57676.7	36.9
A0A0C4DFM0	A0A0C4DFM0	GSTZ1	General	0.084	0.014	-0.018	-0.007	0.031	-0.012	-0.081	-0.092	-0.088	0.176	0.053	0.0285	0.950865	-0.0226667	0.0351853	-0.113667	0.0127961	0.172833	23	14	24398.9	51.3
A0A0C4DFM2	A0A0C4DFM2	ZNF574	General	-0.024	0.016	-0.017	-0.002	-0.028	0.021	0.025	0.031	0.155	-0.087	-0.06	-0.0825	0.989839	0.00533333	0.17632	0.0786667	0.0214929	-0.146833	31	22	111041	23.9
A0A0C4DFM7	A0A0C4DFM7	ZCCHC11	General	0.026	0.006	0.021	0.065	0.033	0.021	-0.087	-0.071	-0.105	0.027	0.03	0.0335	0.939643	0.022	0.0184401	-0.105333	0.010801	0.117833	73	61	188216	37.4
A0A0C4DFN1	A0A0C4DFN1	MFN1	General	-0.032	-0.084	-0.099	-0.05	-0.04	-0.018	0.063	-0.019	0.075	0.057	0.134	0.0845	0.896546	0.0356667	0.0497899	0.111333	0.290637	0.0521667	53	38	84956.8	51.6
A0A0C4DFN3	A0A0C4DFN3	MGLL	General	-0.006	-0.047	-0.007	0.032	-0.021	0.005	0.07	0.132	0.047	-0.067	-0.066	-0.0175	0.936563	0.0253333	0.0450207	0.103	0.0158569	-0.133167	27	16	34520.1	62.6
A0A0C4DFN5	A0A0C4DFN5	TCTN3	General	-0.082	-0.026	-0.058	0.128	0.047	0.079	-0.09	-0.096	0.004	0.007	0.119	0.0135	0.443878	0.14	0.920822	-0.00533333	0.0814292	0.107167	11	8	69441	19.2
A0A0C4DFQ2	A0A0C4DFQ2	ZBTB34	General	0.179	0.028	0.134	-0.001	-0.057	-0.02	-0.173	-0.175	0.037	0.285	-0.153	0.2885	0.637757	-0.139667	0.0427037	-0.217333	0.133304	0.243833	2	2	56778.4	3.9
A0A0C4DFW2	A0A0C4DFW2	ING1	General	-0.087	0.026	0.02	0.018	-0.124	0.005	0.051	0.063	0.113	-0.177	-0.02	-0.0055	0.975527	-0.02	0.118027	0.0893333	0.0471997	-0.143167	7	6	47692.9	14.9
A0A0C4DFX9	A0A0C4DFX9	NELFA	General	-0.011	-0.016	0.024	-0.026	-0.08	-0.028	0.076	0.091	0.075	-0.09	-0.042	-0.0105	0.882873	-0.0436667	0.0477067	0.0816667	0.0133012	-0.128167	45	27	58726.5	67.7
A0A0C4DFY5	A0A0C4DFY5	GPRC5C	General	-0.015	0.059	-0.059	-0.036	0.02	-0.116	0.257	0.197	0.115	0.024	0.033	-0.0025	0.940308	-0.039	0.0180216	0.194667	0.0111216	-0.1715	7	6	53504	16.2
A0A0C4DFZ2	A0A0C4DFZ2	ARSA	Endoplasmic Reticulum	0.002	0.034	0.092	0.172	-0.001	0.033	-0.115	-0.065	-0.008	-0.051	-0.045	-0.0515	0.967397	0.0253333	0.0733959	-0.105333	0.773924	0.0135	11	10	54661.3	23.1
A0A0C4DG49	A0A0C4DG49	PVR	General	-0.164	0.036	-0.034	0.021	0.049	-0.145	0.275	0.126	0.028	-0.041	0.093	-0.0055	0.972912	0.029	0.0765249	0.197	0.144584	-0.1275	16	8	45833.3	17
A0A0C4DG91	A0A0C4DG91	NME6	General	-0.111	0.022	-0.055	-0.041	0.036	-0.01	0.234	0.235	0.296	-0.021	-0.067	-0.0795	0.920152	0.043	0.0020146	0.303	0.00031186	-0.310833	7	6	22173.9	34.5
A0A0C4DGI3	A0A0C4DGI3	CS	General	-0.038	0.264	-0.448	-0.321	-0.088	-0.203	0.148	0.166	0.308	0.098	0.136	-0.1335	0.943258	-0.13	0.214857	0.281333	0.0956286	-0.173833	3	22	44873.6	54.5
A0A0C4DGQ5	A0A0C4DGQ5	CAPNS1	General	0.096	-0.042	0.005	-0.024	0.009	-0.033	-0.009	-0.007	-0.101	0.008	0.011	0.0175	0.937011	-0.0356667	0.346541	-0.0586667	0.263177	0.0511667	60	19	34070.7	73.6
A0A0C4DGW0	A0A0C4DGW0	NDFIP2	General	-0.032	0.089	0.05	0.055	-0.044	-0.019	-0.1	-0.189	0.09	-0.06	-0.082	0.0375	0.936563	-0.0383333	0.302067	-0.102	0.738909	0.0315	4	2	27307.3	9.5
A0A0C4DGZ1	A0A0C4DGZ1	ZC3H8	General	-0.009	-0.05	-0.03	0.015	-0.084	0.008	0.234	0.268	0.306	-0.048	0.022	0.0175	0.986252	0.00933333	0.000616503	0.299	0.000710941	-0.272167	29	20	34999.7	65.3
A0A0C4DH75	A0A0C4DH75	MPP2	General	0.242	0.018	0.017	0.112	-0.007	0.093	-0.278	-0.359	-0.326	0.056	0.076	0.0925	0.977806	-0.0263333	0.00342886	-0.413333	9.36e-05	0.395833	4	6	67148.4	10.8
A0A0D2X7Z3	A0A0D2X7Z3	CRY2	General	-0.001	0.05	-0.018	0.099	0.137	0.096	-0.101	-0.099	-0.011	0.087	0.007	-0.0035	0.628784	0.100333	0.124542	-0.0806667	0.0733528	0.1005	3	6	69684.4	10
A0A0D9SEI0	A0A0D9SEI0	C6orf203	General	-0.09	-0.05	-0.195	-0.064	0.042	-0.012	0.167	0.078	0.145	0.092	-0.001	-0.0085	0.815969	0.100333	0.00707442	0.241667	0.0713562	-0.1025	6	5	28570.5	16.7
A0A0D9SF53	A0A0D9SF53	DDX3X	General	0.051	-0.035	0.012	0.018	-0.046	-0.001	-0.009	-0.003	-0.007	-0.048	-0.043	0.0225	0.959508	-0.019	0.71478	-0.0156667	0.695291	-0.0165	210	64	82160.2	70.8
A0A0D9SF60	A0A0D9SF60	PKP4	General	0.003	0.036	-0.02	0.005	0.029	0.047	-0.1	-0.145	-0.069	0.07	0.055	0.0535	0.944801	0.0206667	0.0328053	-0.111	0.00440389	0.164167	28	22	134765	18.6
A0A0D9SFG6	A0A0D9SFG6	CYTH2	General	0.071	-0.103	0.064	0.007	-0.024	0.156	-0.169	-0.121	-0.129	0.042	-0.099	-0.0535	0.966475	0.0356667	0.0548398	-0.150333	0.0770866	0.102833	5	8	46901.6	27.7
A0A0D9SFM0	A0A0D9SFM0	SHPRH	General	-0.017	-0.04	-0.051	-0.036	-0.033	-0.007	0.171	0.151	0.077	0.028	-0.002	-0.0255	0.972912	0.0106667	0.00840199	0.169	0.0181689	-0.132833	36	31	196027	21
A0A0D9SG04	A0A0D9SG04	COBLL1	General	0.069	0.089	0.097	0.102	0.013	0.078	-0.519	-0.57	-0.563	-0.031	0.049	0.0355	0.950865	-0.0206667	2.93e-05	-0.635667	2.43e-05	0.5685	62	45	135658	46.2
A0A0D9SGE8	A0A0D9SGE8	PHF6	General	0.067	0.009	0.063	0.075	-0.076	0.03	-0.07	-0.039	-0.028	-0.117	-0.029	0.0045	0.940308	-0.0366667	0.0476253	-0.092	0.977561	-0.0015	51	23	42501.9	61.2
A0A0D9SGF6	A0A0D9SGF6	SPTAN1	General	0.037	0.115	0.111	0.015	-0.027	0.022	-0.142	-0.217	-0.2	-0.066	0.125	0.0205	0.77479	-0.0843333	0.00167714	-0.274	0.0112711	0.212833	3	265	288398	81.7
A0A0G2JH68	A0A0G2JH68	DIAPH1	General	0.098	-0.027	-0.041	0.022	0.052	0.036	-0.222	-0.274	-0.355	0.111	0.098	0.1075	0.952379	0.0266667	0.00510847	-0.293667	0.000228725	0.389167	184	83	142041	62.8
A0A0G2JHL1	A0A0G2JHL1	GPANK1	General	0.048	-0.019	-0.078	-0.057	-0.033	0.016	0.136	0.189	0.227	0.054	0.001	-0.0295	0.98803	-0.00833333	0.0103446	0.200333	0.00698588	-0.1755	5	5	39640.6	17.6
A0A0G2JIW1	A0A0G2JIW1	HSPA1B	General	-0.013	-0.016	0.041	0.085	-0.013	0.037	-0.111	-0.029	0.008	0.026	-0.03	-0.0075	0.931629	0.0323333	0.362829	-0.048	0.423131	0.0401667	187	62	70393.3	78
A0A0G2JJD3	A0A0G2JJD3	ABHD16A	General	-0.094	-0.013	-0.023	0.025	0.047	0.032	-0.021	-0.042	-0.022	0.053	0.101	-0.0475	0.785362	0.078	0.733452	0.015	0.242685	0.0638333	24	20	68145.5	32.1
A0A0G2JK44	A0A0G2JK44	BRD2	General	0.015	-0.016	0.004	-0.003	-0.104	0.045	0.003	0.057	0.08	-0.014	0.029	0.0025	0.966475	-0.0216667	0.276863	0.0456667	0.336082	-0.0408333	46	40	92407.1	41.5
A0A0G2JK64	A0A0G2JK64	EHMT2	General	-0.032	-0.004	0.003	-0.022	-0.061	-0.012	0.073	0.074	0.083	-0.042	0.011	-0.0415	0.943258	-0.0206667	0.0349126	0.0876667	0.0264084	-0.100833	76	51	141234	53.3
A0A0G2JL52	A0A0G2JL52	VARS2	General	-0.058	0.037	-0.151	-0.036	0.029	-0.041	0.192	0.148	0.159	0.016	-0.046	-0.0685	0.940308	0.0413333	0.0120674	0.223667	0.00258191	-0.199167	22	18	122753	21.7
A0A0G2JLB3	A0A0G2JLB3	GBA	General	-0.009	-0.055	-0.058	-0.054	0.012	-0.001	0.117	-0.03	-0.01	0.101	0.161	0.0505	0.937011	0.0263333	0.274562	0.0663333	0.218509	0.0785	34	18	60175.6	44.5
A0A0G2JN29	A0A0G2JN29	NOMO1	General	0.016	0.034	-0.086	0.15	0.148	-0.01	-0.048	-0.011	0.081	-0.026	0.124	-0.0545	0.82075	0.108	0.771209	0.0193333	0.926437	0.00716667	5	63	140622	64.7
A0A0G2JNR6	A0A0G2JNR6	PPP2R3B	General	0.008	-0.02	0.013	-0.018	-0.034	-0.051	0.165	0.212	0.107	-0.007	-0.081	-0.1075	0.886515	-0.0346667	0.0111987	0.161	0.00340519	-0.2265	12	11	65829.3	18.7
A0A0G2JNU3	A0A0G2JNU3	BDP1	General	-0.075	-0.051	0.006	-0.017	-0.066	0.06	0.141	0.187	0.259	-0.077	-0.092	-0.0705	0.941463	0.0323333	0.00479495	0.235667	0.000857701	-0.2755	23	21	295549	9.2
A0A0G2JNW7	A0A0G2JNW7	SLC12A7	General	-0.025	0.068	-0.025	0.125	0.14	-0.003	-0.124	-0.093	-0.165	0.103	0.113	0.0115	0.861266	0.0813333	0.0297673	-0.133333	0.00425764	0.203167	15	14	120389	15
A0A0G2JNY3	A0A0G2JNY3	ARHGAP27	General	0.01	-0.043	-0.054	0.02	0.004	0.07	-0.105	0.005	-0.083	0.053	-0.017	-0.0015	0.831386	0.0603333	0.53714	-0.032	0.165718	0.0725	14	11	99167.9	15.4
A0A0G2JPP5	A0A0G2JPP5	SCRIB	General	-0.079	0.074	0.006	0.025	0.062	-0.094	0.051	-0.011	-0.02	-0.063	0.023	-0.0235	0.997735	-0.00266667	0.922403	0.00633333	0.556428	-0.0278333	112	72	178691	51.6
A0A0G2JPT5	A0A0G2JPT5	RAD17	General	0.01	-0.003	-0.009	0.026	-0.011	0.046	-0.076	-0.022	-0.059	-0.017	-0.001	-0.0225	0.942978	0.021	0.180304	-0.0516667	0.311674	0.0388333	18	15	77724	27.3
A0A0G2JPX0	A0A0G2JPX0	CDKN1C	General	-0.081	0.055	0.031	0.108	0.168	0.141	-0.6	-0.515	-0.464	0.237	0.137	0.0535	0.637757	0.137333	0.000473472	-0.528	9.02e-05	0.668833	4	3	32525.2	11
A0A0G2JQ	A0A0G2JQ	TUBGCP5	General	0.089	0.064	0.026	-0.022	-0.003	0.046	-0.097	-0.046	-0.1	0.023	0.003	-0.0095	0.86309	-0.0526667	0.0124561	-0.140667	0.0491144	0.0865	25	21	119620	21.8
A0A0G2JS53	A0A0G2JS53	NAIP	General	-0.022	-0.113	-0.041	-0.085	-0.001	-0.077	0.031	0.198	-0.066	0.05	0.017	0.0195	0.997303	0.00433333	0.223244	0.113	0.760163	-0.0255	4	4	162007	2.5
A0A0G2JS76	A0A0G2JS76	MAPT	General	0.156	-0.207	0.015	-0.038	0.016	0.091	-0.132	-0.261	-0.312	0.088	0.04	0.0895	0.97658	0.035	0.101004	-0.223	0.00185096	0.3075	3	3	81194.7	5.6
A0A0J9YW98	A0A0J9YW98	ZNF623	General	-0.005	-0.008	-0.061	-0.059	-0.068	-0.01	0.163	0.16	0.342	-0.052	-0.002	-0.0415	0.948255	-0.021	0.0118628	0.246333	0.00609202	-0.2535	8	12	63103.7	17.9
A0A0J9YWL0	A0A0J9YWL0	CRYBG1	General	-0.009	-0.062	-0.016	-0.114	-0.058	-0.17	1.207	1.276	1.228	0.045	-0.08	0.0055	0.805167	-0.085	6.23e-06	1.266	2.38e-06	-1.24683	29	21	233644	14
A0A0J9YXN7	A0A0J9YXN7	PLIN4	General	0.066	0.043	0.106	0.124	0.032	0.036	-0.297	-0.398	-0.41	-0.021	0.019	0.0905	0.98803	-0.00766667	0.000372921	-0.44	0.000363511	0.397833	132	57	136874	52.9
A0A0J9YY01	A0A0J9YY01	MYO15B	General	-0.018	-0.147	-0.147	-0.009	0.035	-0.126	0.075	0.099	-0.018	0.055	0.117	0.0905	0.890021	0.0706667	0.043368	0.156	0.488423	0.0355	3	3	335998	0.8
A0A0J9YYF7	A0A0J9YYF7	DAAM2	General	-0.02	0.17	-0.247	0.006	0.027	-0.013	0.023	-0.204	-0.361	0.095	0.19	0.0795	0.97357	0.039	0.390848	-0.148333	0.0254138	0.302167	8	5	125364	1.9
A0A0KG68	A0A0KG68	PAPD7	General	0.061	0.043	-0.053	0.04	-0.035	0.085	-0.051	-0.007	-0.046	-0.049	-0.073	0.0425	0.985852	0.013	0.315393	-0.0516667	0.877318	0.00816667	6	8	85104.9	11.1
A0A0KG71	A0A0KG71	NELFB	General	-0.026	-0.012	-0.011	-0.008	-0.053	-0.029	0.085	0.088	0.062	-0.106	0.018	-0.0535	0.966475	-0.0136667	0.0253877	0.0946667	0.0283184	-0.1255	56	34	70665.3	54.1
A0A0R4J2F2	A0A0R4J2F2	CLDND1	General	0.018	-0.006	-0.243	-0.164	0.022	-0.167	0.106	-0.027	-0.099	0.239	0.107	0.1785	0.985852	-0.026	0.52469	0.0703333	0.0350319	0.1815	6	6	31734.9	18.8
A0A0U1RQE4	A0A0U1RQE4	SH3D19	General	-0.008	0.041	0.055	0.041	-0.012	0.022	-0.094	-0.013	-0.004	-0.065	-0.071	-0.0785	0.972912	-0.0123333	0.184964	-0.0663333	0.432725	-0.0345	33	28	115424	31.4
A0A0U1RQK4	A0A0U1RQK4	ADPRHL1	General	0.154	0.107	-0.158	-0.036	-0.032	0.371	-0.336	-0.375	-0.201	0.198	0.099	0.0575	0.966475	0.0666667	0.0221231	-0.338333	0.000795271	0.422167	4	2	213468	1.5
A0A0U1RQK7	A0A0U1RQK7	EIF4G3	General	0.033	0.006	0.025	0.019	0.044	0.062	-0.11	-0.123	-0.188	0.02	0.03	0.0675	0.942611	0.0203333	0.0074775	-0.161667	0.00400831	0.1795	70	63	196411	36.1
A0A0U1RQW6	A0A0U1RQW6	DIP2C	General	-0.015	0.032	-0.016	-0.055	0.056	-0.106	0.02	0.198	-0.033	0.005	0.009	-0.1015	0.942978	-0.0353333	0.448743	0.0613333	0.267971	-0.0908333	5	10	180480	8.2
A0A0U1RRB3	A0A0U1RRB3	CMTR2	General	-0.005	-0.044	-0.024	-0.036	-0.03	-0.024	0.122	0.194	0.152	-0.015	-0.025	0.0145	0.98803	-0.00566667	0.00457674	0.180333	0.00469651	-0.1645	17	13	90062	17.7
A0A0U1RRB6	A0A0U1RRB6	EXOC6B	General	0.01	0.055	0.051	0.036	-0.033	0.044	-0.087	-0.054	-0.052	0.004	-0.015	-0.0315	0.944801	-0.023	0.0266039	-0.103	0.191117	0.0501667	26	18	95426.3	25.6
A0A0U1RRE5	A0A0U1RRE5	NBDY	General	0.057	-0.032	0.013	0.063	0.072	0.065	-0.132	-0.101	-0.009	0.075	-0.1	0.0645	0.85113	0.054	0.121554	-0.0933333	0.201774	0.0938333	8	3	7139	64.7
A0A0U1RRH6	A0A0U1RRH6	PHF14	General	-0.025	-0.007	0.004	0.007	-0.096	-0.02	0.101	0.117	0.175	-0.143	-0.038	-0.0405	0.940308	-0.027	0.011701	0.140333	0.00485483	-0.204833	68	43	109152	46.5
A0A0U1RRL7	A0A0U1RRL7	MMP24OS	General	-0.343	0.092	0.067	0.065	0.014	-0.111	0.073	0.202	-0.024	-0.1	-0.132	-0.3565	0.972912	0.0506667	0.376905	0.145	0.0228639	-0.279833	2	2	7736.4	49.2
A0A0U1RRM4	A0A0U1RRM4	PTBP1	General	-0.248	0.042	0.079	-0.031	0.023	-0.07	0.425	0.364	0.492	-0.039	0.063	-0.1095	0.989839	0.0163333	0.00658054	0.469333	0.000433281	-0.4555	2	38	62691.3	78.7
A0A140T8X2	A0A140T8X2	CFAP47	General	0.104	0.023	-0.091	-0.164	0.002	0.009	-0.051	-0.055	-0.304	0.153	0.116	0.0775	0.922258	-0.063	0.187324	-0.148667	0.0184336	0.252167	3	2	365498	0.3
A0A140T9R9	A0A140T9R9	RPP21	General	-0.024	-0.111	-0.059	-0.002	-0.062	-0.022	0.196	0.275	0.222	0.037	-0.008	0.0215	0.91589	0.036	0.00128796	0.295667	0.00167341	-0.214167	9	6	18822.1	54.3
A0A1B0GTG1	A0A1B0GTG1	IQANK1	General	0.256	0.025	-0.093	0	-0.003	-0.127	-0.075	-0.337	0.009	0.281	0.12	0.0885	0.901243	-0.106	0.212753	-0.197	0.0295976	0.2975	3	4	63960	4.8
A0A1B0GTL5	A0A1B0GTL5	RAB11FIP5	General	-0.015	0.045	0.013	-0.002	-0.095	0.001	-0.036	0.013	0.112	-0.107	-0.065	-0.0665	0.891276	-0.0463333	0.800118	0.0153333	0.0682587	-0.109167	32	27	139039	31.4
A0A1B0GTZ4	A0A1B0GTZ4	DCLK3	General	-0.013	-0.12	-0.107	-0.096	0.245	0.009	0.067	-0.244	-0.349	0.128	0.069	0.2195	0.880682	0.132667	0.487133	-0.0953333	0.0336633	0.314167	2	5	93224	6.3
A0A1B0GU24	A0A1B0GU24	TNRC6C	General	-0.02	0.067	0.063	0.13	0.038	0.01	-0.177	-0.24	-0.253	0.073	-0.132	0.0915	0.966475	0.0226667	0.00242159	-0.26	0.015716	0.234167	3	4	203516	1.8
A0A1B0GU45	A0A1B0GU45	LRMP	General	-0.092	0.147	0.08	-0.023	0.009	-0.03	0.057	0.082	-0.035	-0.024	0.002	-0.0795	0.920863	-0.0596667	0.914557	-0.0103333	0.204897	-0.0685	9	7	166700	4.5
A0A1B0GUA3	A0A1B0GUA3	KIF1BP	General	0.086	-0.037	-0.018	-0.005	0.039	0.01	-0.122	-0.09	-0.176	0.086	0.07	0.0665	0.997353	0.00433333	0.0389056	-0.139667	0.00200851	0.2035	52	31	75466.9	52.7
A0A1B0GUD6	A0A1B0GUD6	GRAMD1B	General	-0.204	-0.08	-0.032	0.003	0.013	-0.043	0.329	0.329	0.297	0.051	0.076	-0.0715	0.82075	0.0963333	0.000872055	0.423667	0.0012089	-0.299833	22	21	101868	26.6
A0A1B0GUG6	A0A1B0GUG6	RASSF3	General	-0.029	-0.054	-0.143	-0.036	-0.105	0.027	0.164	0.236	0.329	-0.007	-0.024	-0.0255	0.940308	0.0373333	0.00379878	0.318333	0.00243666	-0.261833	4	4	35034.5	14
A0A1B0GUH5	A0A1B0GUH5	ASAH1	General	0.076	-0.005	-0.02	-0.013	-0.021	-0.073	-0.098	-0.061	-0.115	0.103	0.101	0.1595	0.886082	-0.0526667	0.0490795	-0.108333	0.00156551	0.2125	22	16	44873.9	41.9
A0A1B0GUI1	A0A1B0GUI1	RALGAPA1	General	-0.017	-0.015	-0.027	0.004	0.034	0.045	-0.087	-0.063	-0.037	0.049	0.03	0.0135	0.831386	0.0473333	0.248513	-0.0426667	0.0350208	0.0931667	51	41	282518	17.8
A0A1B0GUI2	A0A1B0GUI2	ZC3H11B	General	0.043	-0.06	-0.127	-0.048	-0.087	-0.068	0.125	0.03	0.062	-0.209	-0.063	-0.0625	0.972912	-0.0196667	0.0970299	0.120333	0.0170356	-0.183833	3	29	90310.2	30.7
A0A1B0GUN3	A0A1B0GUN3	FBRSL1	General	-0.187	-0.004	0.108	0.05	-0.015	0.066	-0.015	0.105	0.338	-0.211	-0.205	-0.1115	0.940308	0.0613333	0.241323	0.170333	0.0159296	-0.3185	2	2	56738.2	4.4
A0A1B0GUN9	A0A1B0GUN9	ESPN	General	-0.049	0.028	0.033	0.053	0.027	0.115	-0.167	-0.115	-0.053	0.031	-0.009	0.0035	0.868919	0.061	0.0601056	-0.115667	0.0303499	0.120167	8	5	148932	3.1
A0A1B0GUS7	A0A1B0GUS7	UNC13B	General	0.027	-0.002	-0.009	0.02	0.036	0.037	-0.111	-0.081	-0.143	0.076	0.029	0.0025	0.920152	0.0256667	0.0193486	-0.117	0.00934497	0.1475	50	35	488684	8.6
A0A1B0GUZ7	A0A1B0GUZ7	EFR3A	General	-0.026	0.126	0.009	0.026	0.109	-0.037	-0.117	-0.176	-0.217	0.058	0.026	-0.0185	0.997735	-0.00366667	0.0151326	-0.206333	0.00490007	0.191833	14	12	97042.1	16.5
A0A1B0GV02	A0A1B0GV02	ZEB2	General	-0.054	0.04	-0.035	0.002	-0.018	0.08	0.214	0.224	0.371	-0.062	-0.075	-0.0195	0.922718	0.0376667	0.0055306	0.286	0.00130102	-0.321833	9	8	140618	6.1
A0A1B0GV03	A0A1B0GV03	GOLGA6L7	General	0.041	0.14	0.113	0.028	-0.162	-0.002	-0.155	0.041	0.696	0.068	-0.36	-0.1025	0.77479	-0.143333	0.728836	0.096	0.232409	-0.3255	3	3	75867.4	4.5
A0A1B0GV05	A0A1B0GV05	RAP1GAP2	General	0.068	0.03	0.039	0.034	-0.012	-0.043	-0.042	0.007	-0.033	-0.112	-0.051	-0.1215	0.851781	-0.0526667	0.0981633	-0.0683333	0.10993	-0.0721667	20	18	85693.7	29.3
A0A1B0GV68	A0A1B0GV68	FARP1	General	0.046	-0.149	-0.102	-0.014	0.108	-0.102	-0.128	-0.231	-0.267	0.128	-0.028	0.0715	0.923591	0.0656667	0.106478	-0.140333	0.00485483	0.265833	3	17	88555.5	26.4
A0A1B0GV70	A0A1B0GV70	TEPSIN	General	-0.03	0.025	0.071	0.018	0.018	-0.013	-0.08	-0.018	-0.109	0.007	-0.003	0.0605	0.972912	-0.0143333	0.105688	-0.091	0.0731879	0.0905	19	16	62782.6	44.5
A0A1B0GVL4	A0A1B0GVL4	FAM193A	General	-0.021	-0.035	0.017	0.007	-0.063	0.06	-0.057	0.039	0.022	-0.052	-0.048	-0.0145	0.977806	0.0143333	0.77122	0.0143333	0.387699	-0.0395	27	23	168423	17.1
A0A1B0GVM0	A0A1B0GVM0	BEGAIN	General	-0.035	0.029	0.069	0.01	0.008	0.005	-0.008	-0.03	-0.014	-0.038	0.006	0.0025	0.97357	-0.0133333	0.404782	-0.0383333	0.851437	0.0075	21	16	88470.6	27.4
A0A1B0GVP4	A0A1B0GVP4	LCORL	General	0.149	0.051	-0.017	0.008	-0.066	0.076	-0.068	-0.008	-0.026	-0.068	0.012	0.0375	0.920152	-0.055	0.145485	-0.095	0.572199	0.0278333	8	6	214108	2.9
A0A1B0GW05	A0A1B0GW05	DPY19L1	General	-0.165	-0.113	-0.035	0.005	0.091	-0.018	-0.016	-0.004	-0.092	0.147	0.2	0.0645	0.702992	0.130333	0.258368	0.067	0.0139734	0.1745	21	15	85445.2	21.6
A0A1B0GW41	A0A1B0GW41	ING5	General	-0.034	0.012	0.011	0.013	-0.044	0.067	0.018	0.05	0.161	-0.017	-0.005	-0.0435	0.972912	0.0156667	0.179874	0.08	0.0907534	-0.0981667	15	12	28803.1	33.8
A0A1B0GWA0	A0A1B0GWA0	ZNF654	General	0.022	-0.039	0.008	-0.052	-0.059	-0.021	0.158	0.178	0.103	0.038	0.03	0.0065	0.886082	-0.041	0.0123064	0.149333	0.016931	-0.1215	8	8	130327	7.8
A0A1B0GWK2	A0A1B0GWK2	KAZN	General	-0.078	0.08	0.102	-0.065	0.008	0.047	0.03	0.16	0.042	0.016	-0.072	-0.0275	0.948255	-0.038	0.593543	0.0426667	0.085968	-0.105167	2	2	96592.3	1.7
A0A1C7CY	A0A1C7CY	ELMSAN1	General	-0.039	-0.051	-0.017	-0.034	-0.049	0.016	0.112	0.095	0.159	-0.045	0.003	-0.0295	0.972557	0.0133333	0.00669658	0.157667	0.00782335	-0.145833	45	33	121245	42.4
A0A1C7CYW8	A0A1C7CYW8	DNAH10	General	0.018	0.001	-0.158	-0.027	-0.02	-0.037	0.1	0.034	0.063	0.134	-0.052	0.0065	0.977806	0.0183333	0.126273	0.112	0.580341	-0.0361667	7	6	525126	1
A0A1C7CYX9	A0A1C7CYX9	DPYSL2	General	-0.022	-0.046	-0.003	0.032	-0.046	-0.045	0.161	0.224	0.194	-0.083	-0.087	-0.0535	0.996126	0.004	0.002048	0.216667	0.000440244	-0.2675	67	29	74072.2	59.6
A0A1P0AYU5	A0A1P0AYU5	SFXN3	General	-0.024	0.066	-0.027	-0.014	0.16	-0.061	-0.053	-0.081	-0.202	0.081	0.011	0.0705	0.977806	0.0233333	0.097972	-0.117	0.0193914	0.166167	20	15	36320.6	56.6
A0A1W2PKR9	A0A1W2PKR9	MAP3K21	General	0.021	-0.081	-0.033	-0.004	-0.004	0.038	0.084	0.023	-0.021	0.028	-0.028	-0.0085	0.901243	0.041	0.279947	0.0596667	0.510075	-0.0315	9	9	115096	7.9
A0A1W2PNV4	A0A1W2PNV4		General	-0.022	-0.079	-0.046	-0.013	-0.008	-0.002	-0.002	0.038	-0.079	0.083	0.088	0.0495	0.881235	0.0413333	0.499007	0.0346667	0.0904382	0.0878333	50	30	77070.1	46
A0A1W2PPJ5	A0A1W2PPJ5	CRBN	General	0.091	0.029	-0.002	-0.021	0.055	-0.002	-0.195	-0.134	-0.322	0.122	0.077	0.0895	0.940308	-0.0286667	0.0097784	-0.256333	0.001805	0.313167	19	16	56750.6	38.3
A0A1W2PQ51	A0A1W2PQ51	DD7	General	0.014	0.027	0.038	0.071	0.004	0.061	-0.127	-0.1	-0.038	-0.021	0.03	-0.0235	0.950865	0.019	0.0290753	-0.114667	0.0868781	0.0835	166	65	81140.9	61
A0A1W2PQ69	A0A1W2PQ69	ZNF888	General	-0.056	-0.075	-0.122	0.017	-0.085	0.07	-0.007	0.072	0.169	0.013	0.023	-0.0815	0.831386	0.085	0.0357679	0.162333	0.172782	-0.0931667	5	21	86001	23.6
A0A1W2PQ73	A0A1W2PQ73	LOC390937	General	-0.033	-0.039	0.097	-0.07	0.003	0.063	0.243	0.305	0.286	-0.234	-0.149	-0.2375	0.989839	-0.00966667	0.00404211	0.269667	6.12e-05	-0.484833	2	2	38017.4	11
A0A1W2PQA9	A0A1W2PQA9	PIGN	General	0.014	-0.118	0.023	-0.037	0.149	0.036	-0.056	-0.214	-0.294	0.078	0.12	0.0585	0.890021	0.0763333	0.103275	-0.161	0.00722552	0.2735	7	7	110963	8.3
A0A1W2PQG7	A0A1W2PQG7	PAX6	General	0.018	0.018	-0.096	-0.07	0.036	0.099	-0.047	-0.08	0.055	0.008	0	0.0365	0.942978	0.0416667	0.95447	-0.004	0.459913	0.0388333	9	7	53778	14.1
A0A1W2PQS6	A0A1W2PQS6	RPS10-NUDT3	General	0.066	-0.064	-0.008	-0.004	0.007	0.043	-0.078	-0.076	-0.022	0.052	-0.004	0.0355	0.972569	0.0173333	0.300402	-0.0566667	0.0595803	0.0865	128	30	33197.3	63.9
A0A1W2PQX5	A0A1W2PQX5	CCDC187	General	0.167	0.115	0.216	0.127	-0.018	0.119	-0.203	-0.416	-0.19	-0.091	0.003	-0.0425	0.83313	-0.09	0.00282632	-0.435667	0.0203316	0.226167	3	3	224035	1.2
A0A1W2PRB8	A0A1W2PRB8		General	0.064	-0.023	-0.005	-0.004	-0.01	0.001	0.023	0.064	0.04	0.005	0.005	0.0225	0.966475	-0.0163333	0.495558	0.0303333	0.392859	-0.0315	64	35	94356.3	50.3
A0A1W2PRL6	A0A1W2PRL6	PIGT	General	0.388	-0.197	-0.158	-0.018	-0.016	0.162	-0.318	-0.513	-0.487	0.124	0.086	0.4605	0.98803	0.0316667	0.0553768	-0.450333	0.00151986	0.662833	2	3	18837.5	26.3
A0A1W2PRN1	A0A1W2PRN1	GOLGA8J	General	0.034	0.013	-0.021	0.017	0.051	0.028	-0.044	-0.188	-0.191	0.052	0.024	0.0535	0.939703	0.0233333	0.0399465	-0.149667	0.0120314	0.184167	8	5	69053.3	7.2
A0A1W2PRP4	A0A1W2PRP4	FAM217A	General	0.082	0.016	0.121	0.171	0.021	-0.1	0.041	-0.132	-0.173	-0.063	0.129	0.0565	0.953588	-0.0423333	0.073714	-0.161	0.155037	0.128833	2	2	73088.5	1.8
A0A1W2PS05	A0A1W2PS05	PIK3C3	General	0.051	-0.019	0.001	-0.001	0.002	0	-0.058	-0.027	-0.083	0.059	0.079	0.0265	0.977806	-0.0106667	0.13558	-0.067	0.0221222	0.110833	73	40	102388	50.1
A0A1W2PS27	A0A1W2PS27	MED17	General	0.027	-0.029	-0.002	0.039	-0.09	0.011	0.069	0.13	0.236	-0.061	-0.136	-0.0435	0.985852	-0.012	0.0436928	0.146333	0.0075436	-0.225167	5	23	74787.8	42.6
A0A1W2PS94	A0A1W2PS94	TE5	General	-0.017	-0.032	-0.04	0.029	0.018	-0.012	0.129	0.029	-0.002	-0.046	0.051	-0.0415	0.873539	0.0413333	0.140683	0.0816667	0.27709	-0.0641667	8	8	363965	3.3
A0A1X7SC74	A0A1X7SC74	FAM92B	General	0.079	-0.002	0.077	-0.006	0.141	-0.007	-0.118	-0.213	-0.268	-0.049	0.001	-0.0245	0.990374	-0.00866667	0.00629067	-0.251	0.0122781	0.1755	2	2	35069.3	4.2
A0A286YES6	A0A286YES6	MACF1	General	-0.046	0.034	0.026	0.014	0.099	-0.036	0.012	-0.085	0.007	-0.006	0.069	0.0165	0.969027	0.021	0.620019	-0.0266667	0.333235	0.0485	12	11	151594	9.3
A0A286YF11	A0A286YF11	MICU1	General	-0.009	0.016	-0.052	0.018	0.038	0.018	-0.077	-0.138	-0.213	0.064	0.129	0.0785	0.886082	0.0396667	0.0479372	-0.127667	0.00322061	0.233167	36	22	55556.5	46.8
A0A286YFF7	A0A286YFF7	PPT1	General	-0.024	0.01	0.011	0.014	-0.063	-0.068	0.006	0.077	0.087	-0.068	0.004	0.0205	0.902192	-0.038	0.200455	0.0576667	0.160508	-0.0711667	23	11	37587.5	43.5
A0A286YFJ1	A0A286YFJ1	FER1L5	General	0.012	0.042	-0.037	-0.037	0.056	-0.056	0.263	-0.199	0.137	0.163	0.099	-0.1575	0.972557	-0.018	0.683413	0.0613333	0.851509	-0.0321667	3	3	244443	1.5
A0AV96	A0AV96	RBM47	General	0.082	0.013	-0.021	-0.035	-0.019	-0.014	-0.047	-0.038	-0.052	0.045	0.09	0.0695	0.886082	-0.0473333	0.141246	-0.0703333	0.0139284	0.113833	46	23	64554.4	47.5
A0AVF1	A0AVF1	TTC26	General	-0.036	-0.084	-0.078	-0.062	0.004	-0.015	0.198	0.227	0.014	0.089	0.093	-0.0345	0.886235	0.0416667	0.0260956	0.212333	0.237715	-0.0971667	15	12	64804.1	25.2
A0AVT1	A0AVT1	UBA6	General	0.005	-0.041	0.028	0.05	0.022	-0.035	-0.014	0.012	-0.049	-0.047	-0.029	0.0225	0.972569	0.015	0.746936	-0.0143333	0.986067	-0.000833333	112	60	119280	64.5
A0FGR8	A0FGR8-2	ESYT2	ER membrane	-0.023	0.048	0.045	0.042	0.024	0.049	-0.117	-0.178	-0.166	0.016	0.098	0.0545	0.966475	0.015	0.00690322	-0.177	0.00226148	0.209833	76	46	105220	50.7
A0FGR8	A0FGR8-6	ESYT2	ER membrane	0.047	-0.018	0.054	0.113	0.074	0.113	-0.297	-0.387	-0.454	-0.061	0.099	0.0975	0.805167	0.0723333	0.000942417	-0.407	0.000888998	0.4245	2	44	99413.3	45.5
A0JNW5	A0JNW5	UHRF1BP1L	General	0.029	-0.008	0.024	0.037	-0.022	0.003	-0.084	0.003	-0.034	-0.009	-0.031	-0.0085	0.985612	-0.009	0.231347	-0.0533333	0.609357	0.0221667	22	20	165622	16.7
A0MZ66	A0MZ66	SHTN1	General	0.068	0.042	0.077	0.148	0.055	0.067	-0.337	-0.389	-0.387	0.009	-0.043	0.0615	0.940308	0.0276667	0.000113407	-0.433333	0.000193241	0.380167	106	55	72152.1	76.3
A0PJW6	A0PJW6	TMEM223	General	-0.139	0.037	-0.025	0.072	0.056	-0.093	0.151	0.178	0.146	-0.127	-0.055	-0.1645	0.937011	0.054	0.0152486	0.200667	0.000810871	-0.273833	8	6	22276.8	29.7
A0PJZ3	A0PJZ3	GXYLT2	General	0.016	-0.022	0.001	0.058	0.189	0.017	-1.276	-1.281	-1.55	0.087	0.213	0.0655	0.831386	0.0896667	5.78e-05	-1.36733	1.29e-05	1.49083	3	2	51454	6
A0PK00	A0PK00	TMEM120B	General	-0.219	0.077	0.084	0.08	-0.085	-0.208	0.267	0.26	0.175	-0.182	-0.042	-0.0565	0.966475	-0.0516667	0.049192	0.253333	0.00119262	-0.3275	2	2	40758.5	9.4
A1A4S6	A1A4S6	ARHGAP10	General	0.076	-0.03	0.019	-0.035	0.018	-0.025	-0.035	-0.014	0.005	0.008	0.022	0.0255	0.920152	-0.0356667	0.44131	-0.0363333	0.366949	0.0331667	26	22	90000.6	30.1
A1IGU5	A1IGU5	ARHGEF37	General	0.091	-0.063	0.034	0.014	0.008	-0.017	0.028	0.014	-0.119	0.054	-0.055	0.0425	0.972569	-0.019	0.533415	-0.0463333	0.544989	0.0395	3	3	76676.1	4.4
A1KXE4	A1KXE4	FAM168B	General	0.064	-0.102	0.236	0.149	-0.172	0.225	-0.122	-0.107	0.003	-0.136	-0.049	-0.0025	0.998591	0.00133333	0.223197	-0.141333	0.846517	0.0128333	2	2	20380.6	30.2
A1KZ92	A1KZ92	PXDNL	General	-0.121	0.054	0.074	-0.067	-0.031	0.041	0.021	-0.059	0.237	0.064	-0.029	-0.1285	0.978387	-0.0213333	0.581659	0.064	0.346464	-0.0975	4	4	166308	2.3
A1L0T0	A1L0T0	ILVBL	ER membrane	-0.022	0.047	0.04	0.082	0.031	0.076	-0.127	-0.235	-0.176	-0.002	0.087	0.0505	0.886515	0.0413333	0.00697395	-0.201	0.00309269	0.2245	56	32	68494.1	56
A1L170	A1L170-2	C1orf226	General	-0.016	-0.101	-0.006	-0.022	-0.173	-0.07	0.35	0.467	0.455	0.04	-0.075	-0.1665	0.920152	-0.0473333	0.00045759	0.465	0.000470784	-0.491167	4	4	33805.4	15.8
A1L188	A1L188	NDUFAF8	Mitochondria	-0.003	0.06	0.005	-0.03	0.012	-0.126	0.093	0.024	-0.05	0.081	-0.07	0.0375	0.869992	-0.0686667	0.978216	0.00166667	0.931766	-0.00616667	5	3	8041	43.2
A1L390	A1L390	PLEKHG3	General	0.008	-0.017	0.008	0.03	-0.043	0.113	-0.114	-0.095	-0.043	0.025	0.03	0.0635	0.940308	0.0336667	0.0646383	-0.0836667	0.0159538	0.1235	35	35	135323	32.4
A1X283	A1X283	SH3PXD2B	General	-0.005	-0.027	-0.01	0.094	0.054	0.067	-0.12	-0.137	-0.14	0.048	0.041	0.0795	0.628784	0.0856667	0.0111784	-0.118333	0.00152702	0.1885	77	50	102034	54.7
A1XBS5	A1XBS5	FAM92A	General	-0.168	0.052	0.305	0.221	-0.393	0.114	0.12	0.136	0.255	-0.313	-0.201	-0.3115	0.972557	-0.0823333	0.477454	0.107333	0.000345887	-0.4455	2	2	33601.2	4.4
A2A274	A2A274	ACO2	General	-0.017	0.074	-0.078	0.02	0.028	-0.042	0.047	-0.025	0.078	-0.034	-0.054	-0.0505	0.988056	0.009	0.530007	0.0403333	0.0983292	-0.0795	130	53	88617.1	69.4
A2A2G4	A2A2G4	ALG6	General	-0.24	0.02	-0.093	-0.109	0.177	0.054	0.092	-0.008	-0.21	0.212	0.153	-0.0135	0.869992	0.145	0.620142	0.0623333	0.160155	0.159167	8	6	59544.9	11.7
A2A3E3	A2A3E3	PCDH15	General	-0.096	0.052	-0.003	-0.015	0.099	-0.173	0.223	0.33	0.161	-0.066	0.218	-0.1135	0.989839	-0.014	0.0120494	0.253667	0.0666067	-0.225167	4	3	172061	1.4
A2A3N6	A2A3N6	PIPSL	General	0.118	0.019	0.019	0.066	-0.019	0.032	-0.112	-0.092	-0.109	-0.017	-0.014	0.0475	0.950865	-0.0256667	0.0135408	-0.156333	0.0225628	0.109833	19	15	95787.6	18.4
A2AJT9	A2AJT9	BCLAF3	Mitochondria	-0.008	-0.023	-0.064	0.035	-0.06	0.102	-0.052	-0.021	0.028	0.041	0.056	0.0125	0.891276	0.0573333	0.713954	0.0166667	0.233564	0.0515	16	14	84269.3	16
A2RRD8	A2RRD8	ZNF320	General	-0.032	0.032	0.103	0.028	-0.032	0.024	-0.062	0.061	0.559	-0.164	-0.092	-0.0155	0.94848	-0.0276667	0.454288	0.151667	0.148824	-0.2765	14	21	61151.1	31
A2RRP1	A2RRP1	NBAS	Endoplasmic Reticulum	-0.001	0.034	-0.024	-0.006	0.018	0.048	-0.087	-0.092	-0.055	0.048	0.078	0.0255	0.958527	0.017	0.0643558	-0.081	0.0106263	0.1285	87	66	271876	30.9
A2RTX5	A2RTX5	TARSL2	General	-0.034	-0.055	-0.107	-0.046	-0.016	-0.048	0.054	0.063	-0.003	0.094	0.099	-0.0335	0.921857	0.0286667	0.0471897	0.103333	0.799592	0.0151667	22	24	93670.8	34.9
A2RU48	A2RU48	SMCO3	General	-0.641	-0.137	0.118	0.103	-0.356	-0.015	0.815	0.786	0.927	-0.401	-0.368	-0.4155	0.952379	0.130667	0.0041695	1.06267	2.38e-06	-1.2375	3	3	25047.8	9.3
A2RU49	A2RU49	HYKK	General	0.031	-0.125	-0.032	-0.012	0.065	0.014	-0.079	-0.186	-0.263	0.109	0.035	0.0705	0.886082	0.0643333	0.112807	-0.134	0.00527032	0.2475	4	4	42217.6	18.4
A2RU67	A2RU67	FAM234B	General	-0.084	-0.08	-0.137	-0.054	-0.038	-0.003	0.087	0.144	0.107	0.019	0	0.0075	0.805167	0.0686667	0.00253502	0.213	0.0232767	-0.103833	4	4	67493.8	8.3
A2RUB6	A2RUB6	CCDC66	General	-0.068	0.057	0.068	-0.105	0.023	-0.176	0.116	0.102	0.034	0.07	-0.094	-0.0275	0.851781	-0.105	0.294615	0.065	0.116067	-0.101167	3	3	110322	2.1
A2RUC4	A2RUC4-2	TYW5	General	0.093	0.006	-0.026	0.167	0.049	-0.063	-0.174	0.011	-0.043	0.03	0.061	0.0495	0.972912	0.0266667	0.225567	-0.093	0.0848012	0.1155	5	4	36718.3	19.7
A2RUC4	A2RUC4	TYW5	General	0.133	-0.057	-0.098	-0.01	0.049	-0.003	-0.12	-0.11	-0.043	0.154	0.041	0.0855	0.985852	0.0193333	0.322986	-0.0836667	0.00744112	0.1845	9	9	17639.8	27.6
A2RUR9	A2RUR9-3	CCDC144A	General	0.025	0.1	-0.036	-0.008	-0.065	0.072	-0.045	-0.229	-0.116	0.122	0.248	0.0395	0.953922	-0.03	0.0614036	-0.159667	0.0117669	0.2665	6	5	134956	3.8
A2VDF0	A2VDF0	FUOM	General	0.236	0.049	-0.094	-0.062	0.021	-0.02	-0.121	-0.037	-0.435	0.242	0.015	-0.0075	0.916419	-0.084	0.127206	-0.261333	0.0656528	0.280833	3	3	16935.6	25.9
A2VDJ0	A2VDJ0-5	TMEM131L	Endoplasmic Reticulum	-0.095	-0.023	0.059	0.022	0.023	-0.092	0.08	-0.024	0.052	-0.01	0.009	-0.0245	0.997735	0.004	0.392428	0.0556667	0.335618	-0.0445	10	8	182032	7.1
A3KMH1	A3KMH1	VWA8	Mitochondria	0.004	0.031	-0.125	-0.044	0.042	-0.047	0.05	0.026	0.011	0.068	0.044	-0.0155	0.985852	0.0136667	0.333392	0.059	0.945345	0.00316667	126	94	215848	53.9
A3KN83	A3KN83	SBNO1	General	-0.008	-0.04	-0.025	-0.016	-0.061	-0.017	0.137	0.16	0.076	-0.059	-0.026	-0.0205	0.9867	-0.007	0.0110549	0.148667	0.00663195	-0.1595	102	63	154994	53.2
A4D104	A4D104	LOC401307	General	0.009	-0.021	0.016	0.185	0.098	0.112	-0.282	-0.408	-0.29	0.022	-0.017	0.1355	0.495599	0.130333	0.00137117	-0.328	0.00101125	0.3735	4	4	15256.6	42.3
A4D1E9	A4D1E9	GTPBP10	Mitochondria	-0.031	0.014	-0.09	-0.088	0.006	-0.079	0.279	0.23	0.268	-0.004	-0.04	0.0025	0.972569	-0.018	0.00124188	0.294667	0.000377545	-0.272833	48	29	43217.4	73.3
A4D1P6	A4D1P6	WDR91	General	0.086	0.027	0.026	0.021	0.03	0.066	-0.14	-0.138	-0.23	0.062	0.034	0.0625	0.9867	-0.00733333	0.00482697	-0.215667	0.00191837	0.222167	21	18	84255.8	26.3
A4D1U4	A4D1U4	LCHN	General	-0.018	-0.064	-0.178	-0.048	-0.046	0.046	0.103	0.018	-0.088	0.188	-0.039	-0.0335	0.886082	0.0706667	0.242533	0.0976667	0.777692	0.0275	8	7	52129.6	18
A4UGR9	A4UGR9-6	XIRP2	General	0.08	0.139	-0.049	0.013	-0.194	-0.108	-0.142	0.022	0.069	-0.068	-0.169	-0.0915	0.805167	-0.153	0.430302	-0.0736667	0.222662	-0.0925	4	4	111529	4.5
A4UGR9	A4UGR9-8	XIRP2	General	-0.008	0.12	0.179	-0.019	-0.038	-0.089	0.009	0.022	0.069	-0.087	-0.047	-0.0655	0.71177	-0.145667	0.353569	-0.0636667	0.0318416	-0.0998333	4	4	404161	0.8
A5A3E0	A5A3E0	POTEF	General	0.046	0.017	-0.234	-0.204	0.066	0.101	-0.123	-0.117	0.205	-0.195	0.059	0.0875	0.972912	0.0446667	0.767114	0.0453333	0.975344	-0.0045	4	16	123097	15.4
A5D8V6	A5D8V6	VPS37C	General	-0.005	0.034	0.01	0.012	0.049	0.015	-0.056	-0.03	-0.148	0.077	-0.018	-0.0165	0.972557	0.0123333	0.0973154	-0.091	0.11983	0.0921667	7	6	38715.3	19.4
A5PLK6	A5PLK6	RGSL1	General	-0.05	0.007	0.028	-0.019	-0.179	-0.069	0.945	0.956	0.899	-0.038	-0.094	0.0225	0.845566	-0.084	2.2e-05	0.938333	4.17e-06	-0.969833	2	2	126884	2.5
A5PLL7	A5PLL7	TMEM189	ER membrane	-0.117	0.054	-0.047	-0.081	0.293	-0.039	0.289	0.07	-0.288	0.317	0.538	0.1075	0.92967	0.0943333	0.749723	0.0603333	0.147948	0.297167	3	7	31590.8	26.2
A5PLN9	A5PLN9	TRAPPC13	General	0.093	0.033	-0.034	-0.007	0.01	-0.027	-0.061	-0.027	-0.012	0.001	0.063	0.0405	0.920152	-0.0386667	0.231056	-0.064	0.113923	0.0681667	24	17	47207.4	45.3
A5YKK6	A5YKK6	CNOT1	General	0.001	-0.016	-0.005	-0.02	0.008	0.011	-0.044	-0.012	-0.061	0.049	0.021	0.0095	0.9867	0.00633333	0.377187	-0.0323333	0.109872	0.0655	207	120	269273	54
A6NC98	A6NC98	CCDC88B	Endoplasmic Reticulum	-0.009	0.089	-0.026	-0.066	0.049	-0.098	0.041	0.079	0.055	-0.155	-0.077	-0.0615	0.907302	-0.0563333	0.427822	0.0403333	0.00866024	-0.156167	4	4	165263	2.7
A6NCI4	A6NCI4	VWA3A	General	0.105	0.077	0.052	0.037	0.013	0.032	0.159	-0.177	0.062	-0.211	-0.133	-0.0735	0.831386	-0.0506667	0.561636	-0.0633333	0.160347	-0.153833	6	3	135615	3.3
A6ND36	A6ND36	FAM83G	General	-0.021	0.009	-0.035	-0.026	-0.049	-0.031	0.184	0.164	0.15	-0.094	-0.036	-0.0835	0.943258	-0.0196667	0.00296469	0.181667	0.00074008	-0.237167	22	19	91118.6	24.9
A6NDG6	A6NDG6	PGP	General	0.002	0.008	0.056	0.086	0.034	0.003	-0.125	-0.078	-0.1	-0.009	0.005	0.0425	0.958527	0.019	0.0168643	-0.123	0.018429	0.113833	73	22	34461.9	80.9
A6NDN3	A6NDN3	GOLGA6B	General	0.025	0.023	-0.01	-0.012	-0.019	0.027	-0.092	0.035	0.036	-0.093	-0.064	-0.0975	0.966475	-0.014	0.733452	-0.0196667	0.15979	-0.0778333	8	5	80140.1	4.1
A6NDU8	A6NDU8	C5orf51	General	0.134	0.041	0.024	0.088	0.027	0.025	-0.169	-0.135	-0.304	0.048	0.026	0.0245	0.966475	-0.0196667	0.0081867	-0.269	0.00491682	0.2355	30	17	34247.4	60.2
A6NDX5	A6NDX5	ZNF840P	General	-0.049	0.171	-0.249	0.013	-0.009	0.026	-0.027	-0.234	-0.095	0.12	0.061	0.0545	0.966475	0.0523333	0.597124	-0.0763333	0.0191937	0.197167	47	6	85629.8	5.5
A6NDY0	A6NDY0-2	PABPN1L	General	0.008	-0.057	0.109	0.198	-0.166	-0.054	-0.425	0.026	0.028	-0.089	-0.089	-0.0755	0.985852	-0.0273333	0.389207	-0.143667	0.797383	0.0391667	5	3	27780.9	22.7
A6NE01	A6NE01	FAM186A	General	0.125	0.142	0.124	-0.057	0.04	0.015	-0.15	-0.205	-0.32	-0.121	0.006	0.0245	0.495599	-0.131	0.00157149	-0.355333	0.0234318	0.194833	4	3	263153	0.8
A6NED2	A6NED2	RCCD1	General	0.052	0.048	0.049	0.014	-0.011	-0.077	-0.031	0.044	0.013	-0.056	-0.066	-0.0335	0.805167	-0.0743333	0.30713	-0.041	0.155539	-0.0605	12	9	40477.6	31.9
A6NEE1	A6NEE1	PLEKHD1	General	0.162	-0.025	-0.009	-0.05	-0.052	-0.041	0.033	0.1	-0.038	0.098	0.205	0.0295	0.851781	-0.0903333	0.899084	-0.011	0.260826	0.0791667	6	3	59487.5	3.5
A6NEM2	A6NEM2	HCFC1	General	-0.012	-0.008	0.001	0	-0.057	0.001	0.022	0.01	0.058	-0.057	-0.023	-0.0005	0.972569	-0.0123333	0.320624	0.0363333	0.169839	-0.0568333	157	74	215469	45.6
A6NFI3	A6NFI3	ZNF316	General	-0.113	-0.037	-0.066	0.007	-0.062	0.063	-0.009	0.006	0.236	0.04	0.011	0.0685	0.831386	0.0746667	0.120817	0.149667	0.658926	-0.0378333	23	18	110489	19.4
A6NFQ2	A6NFQ2-3	TCAF2	General	0.117	-0.047	0.036	-0.051	0.042	-0.147	-0.389	-0.52	-0.483	0.058	0.125	0.0965	0.886082	-0.0873333	0.000722401	-0.499333	5.68e-05	0.557167	3	2	91990.6	1.3
A6NGJ0	A6NGJ0	DYNLT3	General	-0.021	0.019	0.077	0.117	-0.056	0.032	-0.034	0.009	-0.004	-0.07	-0.005	-0.0255	0.996126	0.006	0.4519	-0.0346667	0.564525	-0.0238333	6	4	17378.2	43.4
A6NGK3	A6NGK3	GAGE10	General	-0.149	-0.073	0.051	0.117	-0.124	0.033	0.229	0.185	0.155	-0.173	-0.077	-0.0125	0.937011	0.0656667	0.0114443	0.246667	0.00228357	-0.277167	2	2	12821.6	15.5
A6NGQ3	A6NGQ3	OBSCN	General	0.1	0.155	0.098	0.105	0.019	0.102	-0.671	-0.659	-0.568	0.005	-0.039	-0.0675	0.901243	-0.0423333	4.37e-05	-0.750333	3.18e-05	0.598833	34	32	986851	3.5
A6NHB5	A6NHB5	ZMYM3	General	0.069	0.049	0.041	0.006	-0.071	0.03	-0.109	-0.08	-0.047	-0.055	0.053	0.0495	0.826544	-0.0646667	0.0117709	-0.131667	0.0832211	0.0945	87	54	156426	49.4
A6NHN6	A6NHN6	NPIPB15	General	0.383	0.044	-0.048	0.066	-0.15	0.359	0.1	0.062	0.111	-0.167	-0.013	-0.0685	0.98803	-0.0346667	0.807036	-0.0353333	0.013692	-0.173833	3	3	51836.3	7.6
A6NHQ4	A6NHQ4	EPOP	General	0.021	0.079	0.143	-0.045	-0.087	-0.123	0.472	0.564	0.582	-0.272	-0.135	-0.2375	0.466059	-0.166	0.000515124	0.458333	2.79e-05	-0.754167	6	6	39948.7	13.7
A6NHR9	A6NHR9	SMCHD1	General	0.033	0.016	0.012	0.016	-0.026	0.003	-0.033	-0.03	-0.014	-0.021	0.035	0.0295	0.937011	-0.0226667	0.191874	-0.046	0.303988	0.0401667	211	121	228081	59.4
A6NHT5	A6NHT5	HMX3	General	-0.019	0.016	0.207	0.142	-0.222	0.03	-0.059	0.006	0.127	-0.497	-0.278	-0.0975	0.940308	-0.0846667	0.661388	-0.0433333	0.0294167	-0.3155	3	3	37881	7.5
A6NHX0	A6NHX0	CASTOR2	General	0.106	-0.063	0.022	-0.081	-0.026	0.011	-0.079	-0.025	-0.164	0.063	0.083	0.0855	0.911368	-0.0536667	0.146854	-0.111	0.0115905	0.1665	11	7	36283.9	27.9
A6NI28	A6NI28	ARHGAP42	General	0.056	-0.016	0.2	0.155	0	0.034	-0.066	-0.071	-0.099	0.043	0.035	-0.0765	0.9867	-0.017	0.0578637	-0.158667	0.135666	0.0791667	6	6	99309	6.2
A6NIH7	A6NIH7	UNC119B	General	0.013	0	-0.001	-0.023	0.001	-0.004	-0.058	0.036	-0.017	-0.019	-0.044	-0.0145	0.966475	-0.0126667	0.702539	-0.017	0.77901	-0.0128333	10	9	28364.3	46.2
A6NIW2	A6NIW2	DOCK11	General	0.005	0.014	0.003	-0.033	-0.027	-0.044	0.485	0.536	0.488	-0.026	-0.098	-0.0715	0.85009	-0.042	6.46e-05	0.495667	2.05e-05	-0.568167	30	29	240718	15.8
A6NJ78	A6NJ78	METTL15	Mitochondria	-0.022	0.028	-0.057	-0.018	-0.024	-0.049	0.157	0.171	0.282	-0.032	-0.049	-0.1125	0.972912	-0.0133333	0.00785805	0.220333	0.00200504	-0.267833	19	15	46405.5	45.7
A6NKD9	A6NKD9	CCDC85C	General	-0.017	-0.01	0.032	-0.011	-0.001	-0.021	-0.034	-0.004	0.019	0.013	-0.045	-0.0165	0.971904	-0.0126667	0.847849	-0.008	0.819746	-0.00983333	16	12	45494	31
A6NKF1	A6NKF1	SAC3D1	General	-0.057	-0.035	-0.053	-0.071	0.046	-0.062	0.037	0.073	0.031	0.097	-0.041	-0.0385	0.966475	0.0193333	0.0299863	0.0953333	0.465933	-0.0411667	14	13	44179.9	35.1
A6NLN1	A6NLN1	PTBP1	General	0.046	-0.058	0.027	-0.002	-0.163	-0.145	-0.121	-0.021	0.111	-0.104	0.121	0.0735	0.815969	-0.108333	0.861629	-0.0153333	0.682454	0.0405	9	33	56623.6	77.4
A6NM62	A6NM62	LRRC53	General	-0.323	-0.094	-0.036	-0.172	-0.123	0.125	0.488	0.23	0.04	-0.188	-0.214	-0.1445	0.926588	0.0943333	0.0377777	0.403667	0.00917691	-0.434833	4	4	142165	6.1
A6NMH8	A6NMH8	CD81	General	-0.135	0.069	-0.053	-0.133	-0.021	-0.107	0.277	0.265	0.104	0.091	0.029	-0.0765	0.940308	-0.0473333	0.0229052	0.255	0.0273217	-0.200833	8	3	30547	21.5
A6NMN0	A6NMN0	PHKA1	General	-0.032	-0.107	-0.133	0.007	-0.013	0.014	0.053	0.032	0.009	0.049	-0.016	0.0355	0.729335	0.0933333	0.0316965	0.122	0.845692	-0.0085	19	21	140078	17
A6NMQ1	A6NMQ1	POLA1	General	0.06	0.012	0.029	0.049	0.001	0.051	-0.081	-0.089	-0.127	-0.024	0.062	0.0455	1	0	0.0116046	-0.132667	0.0190634	0.126833	157	84	168280	58.9
A6NMT0	A6NMT0	DB	General	-0.019	0.016	0.142	0.02	-0.186	0.03	-0.096	0.006	0.127	-0.139	-0.097	-0.0975	0.888081	-0.0916667	0.711739	-0.034	0.0997755	-0.1235	3	3	37339.4	6.9
A6NMU8	A6NMU8	NLGN4Y	General	-0.1	-0.052	-0.016	-0.038	-0.009	-0.096	0.302	0.275	0.252	0	0.007	0.0105	0.987709	0.00833333	0.000527559	0.332333	0.00031035	-0.2705	2	4	99246.5	4.8
A6NNL5	A6NNL5	C15orf61	Mitochondria	-0.012	0.067	-0.219	-0.121	-0.001	-0.01	0.197	0.034	0.112	0.105	0.01	0.0365	0.994172	0.0106667	0.129159	0.169	0.304611	-0.0638333	7	6	18318.8	45.2
A6NNM8	A6NNM8	TTLL13P	General	-0.182	0.141	0.101	0.267	-0.048	-0.059	0.097	0.261	0.327	-0.121	-0.156	-0.1145	0.985852	0.0333333	0.129565	0.208333	0.00190292	-0.358833	3	3	95012.8	4.6
A6NNT2	A6NNT2	C16orf96	General	-0.749	0.096	0.573	0.415	-0.323	-0.048	1.67	1.551	1.38	-0.713	-0.304	-1.2525	0.996126	0.0413333	0.00763479	1.56033	0.0001497	-2.29017	5	5	125724	4.9
A6PVC2	A6PVC2	TTLL8	General	0.044	-0.16	-0.402	-0.051	0.268	0.009	-0.017	-0.05	-0.197	0.3	0.279	0.0685	0.821302	0.248	0.56814	0.0846667	0.0108934	0.303833	5	3	96157.7	4.3
A6PW57	A6PW57	PIP5K1A	General	0.009	0.002	-0.088	-0.055	-0.026	-0.064	0.089	0.062	0.024	0.056	0.059	0.0815	0.950865	-0.0226667	0.114494	0.084	0.865806	0.00716667	28	18	61713.1	33.2
A6ZKI3	A6ZKI3	RTL8C	General	0.092	0.035	0.058	-0.023	0.037	0.124	-0.419	-0.293	-0.247	0.121	0.172	0.0845	0.977806	-0.0156667	0.00147296	-0.381333	0.000363166	0.4455	13	8	13170.9	53.9
A7E2V4	A7E2V4-4	ZSWIM8	General	-0.026	-0.001	0.003	-0.017	0.02	-0.004	-0.031	0.055	-0.025	0.039	-0.026	-0.0545	0.985852	0.00766667	0.870787	0.00766667	0.79946	-0.0135	39	33	199945	23.4
A7KAX9	A7KAX9	ARHGAP32	Endoplasmic Reticulum	0.011	-0.008	0.036	0.042	0.061	0.087	-0.127	-0.236	-0.023	-0.026	0.032	0.0315	0.83313	0.0503333	0.0764329	-0.141667	0.0634741	0.141167	16	14	232236	8
A8K070	A8K070	GPS1	General	-0.035	-0.101	-0.185	-0.11	0.099	0.095	-0.215	-0.013	-0.005	0.278	0.131	0.1285	0.82075	0.135	0.751577	0.0293333	0.0158871	0.256833	3	33	59605.7	54.5
A8K2U0	A8K2U0	A2ML1	General	0.056	-0.058	-0.064	-0.015	0.01	-0.007	-0.108	-0.13	-0.119	0.056	-0.003	0.1705	0.972557	0.018	0.0893026	-0.097	0.0108934	0.1935	8	6	162530	4.1
A8K855	A8K855	EFCAB7	General	0.104	-0.065	-0.068	0.075	0.007	-0.047	-0.115	-0.039	-0.197	0.13	0.113	0.0915	0.977806	0.0213333	0.203003	-0.107333	0.00417042	0.2285	9	9	73064	19.2
A8K878	A8K878	MANF	General	-0.04	-0.056	-0.047	0.025	-0.008	0.042	0.112	0.063	0.066	-0.082	0.097	-0.0355	0.77479	0.0673333	0.0111987	0.128	0.175441	-0.0871667	33	14	21599.8	48.1
A8K8V0	A8K8V0	ZNF785	General	-0.018	0.177	-0.474	-0.102	-0.006	0.121	-0.114	-0.693	-0.614	0.189	0.065	0.1655	0.948255	0.109333	0.192983	-0.368667	0.00839691	0.6135	6	3	47308.6	5.6
A8MPS7	A8MPS7	YDJC	General	0.102	-0.084	-0.2	0.033	-0.048	-0.054	0.025	-0.036	-0.146	0.086	-0.023	0.1665	0.966475	0.0376667	0.943203	0.00833333	0.114681	0.128833	2	2	35036.1	12.3
A8MQT2	A8MQT2	GOLGA8B	General	0.15	0.014	0.058	0.086	0.027	0.093	-0.044	-0.153	-0.191	-0.008	-0.014	0.0455	0.996126	-0.00533333	0.0204834	-0.203333	0.0350591	0.137167	3	3	67961.6	3.4
A8MT69	A8MT69	CENPX	General	0.114	-0.048	-0.109	-0.005	0.027	0.033	-0.004	-0.112	-0.045	0.038	0.082	0.0645	0.959251	0.0326667	0.638225	-0.0393333	0.0336396	0.115167	5	3	8959.3	40.7
A8MT70	A8MT70	ZBBX	General	0.02	-0.148	-0.077	-0.004	0.259	-0.422	0.71	0.377	0.491	-0.416	0.09	-0.3175	0.997735	0.0126667	0.00259248	0.594333	0.00352481	-0.7405	4	3	92508.5	2.3
A8MTT3	A8MTT3	CEBPZOS	Mitochondria	-0.021	0.033	-0.015	-0.015	-0.035	-0.024	0.012	-0.018	0.062	0.095	0.039	-0.0215	0.937011	-0.0236667	0.663457	0.0196667	0.725618	0.0188333	4	4	9335.8	40
A8MTZ0	A8MTZ0	BBIP1	General	0.186	-0.051	0.095	-0.11	0.004	-0.085	0.136	0.202	0.078	0	-0.097	0.0865	0.808644	-0.140333	0.474528	0.062	0.0610622	-0.142167	3	2	10563.3	28.2
A8MU27	A8MU27	SUMO3	General	0.141	-0.031	0.014	0.093	-0.145	-0.083	0.433	0.577	0.557	-0.178	-0.154	-0.0045	0.901243	-0.0863333	0.00123193	0.481	0.00014704	-0.6345	4	7	17127.4	29.9
A8MU76	A8MU76		General	0.136	-0.168	-0.124	0.096	-0.072	0.116	-0.222	-0.229	-0.27	0.163	0.241	0.1185	0.911368	0.0986667	0.0949611	-0.188333	0.000166782	0.4145	4	4	37835.7	7.3
A8MUM1	A8MUM1	EIPR1	General	0.057	0.016	0.059	0.114	0.023	0.068	-0.098	-0.082	-0.06	-0.042	-0.072	-0.0025	0.944703	0.0243333	0.0133395	-0.124	0.31434	0.0411667	15	12	46889.2	34.5
A8MUP8	A8MUP8	RARA	General	0.084	0.054	-0.017	-0.042	-0.017	0.104	-0.077	0.009	-0.135	0.055	0.152	0.0535	0.966475	-0.0253333	0.106132	-0.108	0.0288047	0.1545	5	5	53989.8	9.8
A8MVM7	A8MVM7		General	0.203	0.032	-0.085	0.006	-0.071	0.096	-0.044	-0.113	0.086	-0.048	0.019	-0.0735	0.966475	-0.0396667	0.50346	-0.0736667	0.88787	-0.0105	4	3	74306.6	2.9
A8MW92	A8MW92	PHF20L1	General	-0.017	-0.05	-0.046	0.015	-0.048	0.14	-0.057	-0.044	0.083	0.039	0.055	0.0305	0.885527	0.0733333	0.58317	0.0316667	0.384742	0.0475	13	12	116320	11.1
A8MXB7	A8MXB7	SNX24	General	0.103	0.044	0.144	0.005	0.073	0.134	-0.11	-0.183	-0.14	-0.067	-0.064	0.0555	0.955048	-0.0263333	0.00307206	-0.241333	0.0512445	0.119167	3	3	23842.1	16.8
A8MXP9	A8MXP9	MATR3	General	-0.058	0.024	0.02	-0.004	-0.077	0.007	-0.018	0.037	0.16	-0.085	-0.001	-0.0385	0.966475	-0.02	0.354033	0.0643333	0.131793	-0.101167	234	90	100479	70.6
A8MXV4	A8MXV4	NUDT19	Mitochondria	-0.068	-0.069	-0.184	0.005	-0.049	-0.078	0.334	0.406	0.485	0.008	0.029	-0.0995	0.880682	0.0663333	0.000530909	0.515333	0.000473858	-0.429167	15	10	42574.8	29.8
A8TX70	A8TX70	COL6A5	General	-0.244	0.093	0.144	0.095	-0.011	0.02	-0.042	-0.01	0.159	0.002	-0.168	-0.2425	0.977806	0.037	0.799919	0.038	0.0922926	-0.171833	5	5	291974	2.9
A9UHW6	A9UHW6-3	MIF4GD	General	-0.008	-0.005	0.012	-0.043	-0.024	-0.034	0.203	0.237	0.136	-0.159	-0.096	-0.0925	0.886235	-0.0333333	0.00524104	0.192333	0.000586851	-0.307833	13	11	30718.5	42.2
A9Z1Z3	A9Z1Z3	FER1L4	General	-0.361	0.037	0.169	0.16	-0.153	0.014	0.441	0.432	0.679	-0.152	-0.042	-0.3295	0.972912	0.0586667	0.0176629	0.569	0.000700477	-0.691833	3	3	202289	1.2
B0I1T2	B0I1T2	MYO1G	General	0.057	-0.017	0.114	0.097	-0.06	0.006	0.142	0.036	0.073	-0.084	-0.091	-0.0365	0.944801	-0.037	0.59373	0.0323333	0.0116714	-0.154167	2	2	117467	1.3
B0QY89	B0QY89	EIF3L	General	0.005	-0.036	0	-0.007	0	0.014	0.011	0.004	-0.069	0.033	0	0.0235	0.967939	0.0126667	0.870009	-0.00766667	0.393095	0.0368333	85	32	71128.7	56
B0QY95	B0QY95	MIEF1	General	-0.021	-0.024	-0.019	-0.068	-0.077	-0.059	0.256	0.125	0.051	0.073	0.088	0.0175	0.82075	-0.0466667	0.042715	0.165333	0.226426	-0.0845	13	8	53787.3	15.4
B0QYS7	B0QYS7	TFEB	General	0.097	0.024	0.096	0.079	-0.021	0.076	-0.144	-0.174	-0.11	-0.035	-0.067	0.0055	0.947382	-0.0276667	0.00344686	-0.215	0.0293177	0.1105	15	14	62317.7	17.6
B0YIW6	B0YIW6	ARCN1	General	0.007	-0.049	0.015	0.056	-0.012	0.006	-0.052	-0.01	-0.019	-0.025	-0.001	0.0415	0.940308	0.0256667	0.666943	-0.018	0.432344	0.0321667	113	43	62195.8	60.1
B0YJ81	B0YJ81	HACD1	ER membrane	-0.276	0.025	-0.139	-0.018	0.084	-0.131	0.27	0.101	0.008	0.059	0.001	-0.1595	0.893167	0.108333	0.0645369	0.256333	0.128416	-0.1595	4	3	32501.3	10.7
B1AHC4	B1AHC4	PRR5-ARHGAP8	General	-0.019	-0.045	0.011	-0.074	0.018	-0.046	0.106	0.064	0.009	0.147	0.151	0.0065	0.970495	-0.0163333	0.120187	0.0773333	0.504053	0.0418333	3	3	73209.5	5.1
B1AJZ9	B1AJZ9-3	FHAD1	General	0	-0.027	0.01	0.005	0.021	-0.01	0.073	-0.032	-0.029	0.032	0.102	0.0035	0.972912	0.011	0.853239	0.00966667	0.444533	0.0418333	8	7	167381	4.2
B1AK44	B1AK44	MAD2L2	General	0.051	-0.036	-0.127	-0.127	-0.099	0.015	0.293	0.225	0.114	0.063	0.046	0.0425	0.958527	-0.033	0.0182919	0.248	0.024576	-0.160167	8	6	25976.9	26.3
B1AKJ5	B1AKJ5	NRDC	General	0.035	-0.019	0.004	-0.002	0.031	0.017	-0.067	-0.034	-0.156	0.053	0.025	0.0295	0.985776	0.00866667	0.101798	-0.0923333	0.0328263	0.1215	131	58	140438	49.7
B1AP13	B1AP13	CD55	General	-0.112	0.027	-0.017	0.045	0.107	-0.046	0.013	-0.027	-0.044	0.048	0.16	0.0875	0.886515	0.0693333	0.801602	0.0146667	0.0356948	0.117833	73	27	50592.7	58.5
B1AP22	B1AP22	PSEN2	General	-0.203	0.06	0.047	-0.069	0.012	-0.218	0.311	0.115	0.164	-0.112	-0.081	-0.1135	0.948255	-0.0596667	0.0671535	0.228667	0.00260269	-0.298833	6	4	54359.3	9.9
B2RNG4	B2RNG4	TRIM6-TRIM34	General	0.011	0.037	0.046	0.04	0.027	0.088	-0.122	-0.067	-0.097	-0.063	-0.085	-0.0145	0.946133	0.0203333	0.0131063	-0.126667	0.333284	0.0411667	12	12	99895.6	11.6
B2RTY4	B2RTY4-4	MYO9A	General	0.031	0.009	0.022	0.007	0.006	0.074	-0.099	-0.116	-0.084	0.019	-0.031	0.0565	0.985852	0.00833333	0.0112639	-0.120333	0.0244496	0.1145	19	18	302881	7.9
B2RV13	B2RV13	C17orf105	General	-0.031	0.047	0.025	0.087	0.023	-0.071	0.274	0.339	-0.016	-0.09	0.025	-0.2005	0.998591	-0.000666667	0.139587	0.185333	0.0404527	-0.2875	3	3	19660	13.4
B3KPU0	B3KPU0	PDLIM2	General	0.077	0.068	0.114	0.128	0.063	0.031	-0.173	-0.131	-0.214	-0.06	-0.081	0.0015	0.978387	-0.0123333	0.00143377	-0.259	0.0245623	0.126167	20	11	16445.1	85.6
B3KS98	B3KS98	EIF3S3	General	0.056	-0.019	0.017	0.01	-0.025	0.049	-0.1	-0.04	-0.028	-0.005	-0.005	0.0295	0.988056	-0.00666667	0.127141	-0.074	0.149393	0.0625	108	28	41751.7	78.4
B3KU38	B3KU38	IQCJ-SCHIP1	General	0.184	-0.075	0.053	0.009	-0.008	-0.104	0.04	-0.076	0.092	-0.281	-0.033	0.1005	0.889051	-0.0883333	0.726978	-0.0353333	0.452229	-0.0898333	2	2	62703.3	6
B3KW44	B3KW44	METTL8	General	0.001	0.034	-0.004	0.02	0.002	-0.031	0.11	0.133	0.164	-0.056	-0.099	-0.0245	0.970495	-0.0133333	0.0140892	0.125333	0.00252324	-0.1955	19	13	47505.1	28.9
B4DH23	B4DH23	MAN2C1	General	-0.142	0.283	0.472	0.088	-0.128	-0.205	0.058	0.083	0.217	-0.312	-0.488	-0.1285	0.834494	-0.286	0.670309	-0.085	0.00572306	-0.428833	3	3	23704.8	10.5
B4DJL6	B4DJL6	INTS14	General	-0.01	-0.03	0.008	0.016	-0.045	-0.004	-0.014	0.036	0.021	-0.052	-0.039	0.0085	0.998591	-0.000333333	0.510212	0.025	0.310934	-0.0418333	43	23	61971.9	51
B4DL54	B4DL54	CHURC1-FNTB	General	0.066	-0.062	-0.077	0.006	0.05	0.006	-0.038	-0.089	-0.196	0.077	0.018	0.0585	0.920152	0.045	0.270409	-0.0833333	0.0220783	0.158833	33	20	54039.6	30.7
B4DLN1	B4DLN1		General	-0.057	0.005	-0.148	-0.022	0.045	-0.092	0.143	0.166	0.203	0.075	0.03	0.0525	0.939703	0.0436667	0.0064459	0.237333	0.0167501	-0.118167	56	22	48611.9	55.6
B4DPQ0	B4DPQ0	C1R	General	0.178	0.06	-0.263	-0.01	-0.042	0.043	-0.159	-0.214	-0.225	0.001	-0.021	0.0445	0.997735	0.00533333	0.190278	-0.191	0.00209558	0.2075	3	3	83428.5	3.4
B4DR61	B4DR61	SEC61A1	General	-0.328	-0.048	-0.037	-0.032	0.143	-0.117	0.36	0.183	0.023	0.091	0.128	-0.0475	0.886082	0.135667	0.0486654	0.326333	0.234771	-0.1315	41	16	53405	26.1
B4DTS2	B4DTS2	PRKD2	General	-0.021	0.018	-0.014	-0.014	0.019	0.022	-0.085	-0.008	-0.027	0.064	-0.02	-0.0095	0.964939	0.0146667	0.420365	-0.0343333	0.283861	0.0515	20	20	99053.8	30.8
B4DUA7	B4DUA7	IXL	General	-0.053	0	0.05	0.051	-0.085	-0.005	-0.023	0.06	0.09	-0.093	-0.068	-0.0535	0.986194	-0.012	0.447035	0.0433333	0.0382004	-0.113833	14	8	23871.6	46.6
B4DUT8	B4DUT8	CNN2	General	0.02	-0.012	0.054	0.007	-0.067	-0.02	0.015	-0.017	0.031	-0.073	-0.071	-0.0045	0.886082	-0.0473333	0.795383	-0.011	0.176501	-0.0591667	75	20	36399.5	59.3
B4DXR9	B4DXR9	ZNF732	General	0.086	0.094	0.058	0.025	0.055	-0.018	-0.344	-0.271	-0.3	0.092	0.075	-0.0015	0.82075	-0.0586667	0.000236761	-0.384333	0.000267961	0.360167	11	12	69835	14.5
B4DZ31	B4DZ31	PARPBP	General	0.017	-0.061	-0.086	0.018	-0.139	0.001	0.076	0.018	0.165	0.039	-0.097	0.0035	0.997735	0.00333333	0.0674282	0.129667	0.12567	-0.1045	7	6	74166.5	7.9
B4DZS0	B4DZS0	DFFB	General	-0.001	0.002	-0.049	-0.132	-0.068	0.041	0.225	0.107	0.01	0.027	0.072	-0.0235	0.941618	-0.037	0.102078	0.13	0.226426	-0.0888333	5	5	42697	16.5
B5MBW9	B5MBW9	CHCHD10	General	0.017	0.067	0.068	0.186	-0.01	0.166	-0.233	-0.192	-0.041	-0.036	0.014	0.0415	0.906041	0.0633333	0.0206316	-0.206	0.0373076	0.161833	25	3	15159.8	27.5
B5MCU0	B5MCU0	R3HDM2	General	-0.019	0.046	0.021	-0.02	-0.024	-0.002	0.055	0.1	0.078	-0.042	-0.073	-0.0735	0.908781	-0.0313333	0.146433	0.0616667	0.0065311	-0.1405	6	9	109377	12.2
B5MDU6	B5MDU6	LDAH	General	-0.03	-0.002	-0.012	-0.023	-0.005	0.042	-0.035	-0.015	0.015	0.039	0.12	0.0295	0.948255	0.0193333	0.939941	0.003	0.122106	0.0745	18	13	43181.2	41
B5ME97	B5ME97	SEPTIN10	General	0.035	-0.014	-0.016	0.02	-0.003	-0.015	-0.042	0.007	-0.018	0.025	0.016	0.0345	0.99832	-0.001	0.631794	-0.0193333	0.258237	0.0428333	59	29	63742.6	61.5
B7WPA5	B7WPA5	PLEKHB2	General	0.066	-0.005	-0.004	0.007	-0.005	-0.063	0.269	0.181	0.202	-0.124	-0.106	-0.2395	0.902704	-0.0393333	0.0062854	0.198333	0.000520218	-0.373833	2	2	34667.2	5.8
B7WPE2	B7WPE2	EML3	General	-0.012	0.025	0.039	-0.009	-0.032	-0.068	0.127	0.147	0.137	-0.172	-0.094	-0.0905	0.83313	-0.0536667	0.0141347	0.119667	0.000760803	-0.255833	40	30	96366.1	40.5
B7WPL0	B7WPL0	RIC8B	General	-0.007	-0.037	-0.005	-0.035	0.056	-0.001	-0.031	-0.03	-0.126	0.056	0.057	0.0255	0.944818	0.023	0.337168	-0.046	0.0406443	0.1085	17	14	64291.7	25.5
B7XGB9	B7XGB9	ppm1m	General	0.109	0.1	0.067	0.098	0.184	-0.099	-0.068	0.057	0.005	-0.149	-0.193	-0.1005	0.972569	-0.031	0.092645	-0.094	0.0244732	-0.1455	3	3	51648.4	7.1
B7Z1P2	B7Z1P2	FBXO44	General	0.179	0.122	0.265	0.152	-0.079	0.115	-0.357	-0.335	-0.232	-0.051	-0.286	0.2605	0.83313	-0.126	0.000567995	-0.496667	0.0899241	0.2825	2	2	29168.6	7.8
B7Z2R4	B7Z2R4	SGCE	General	0.057	-0.026	-0.11	-0.052	0.065	0.11	0.019	-0.066	0.004	0.027	0.041	0.0865	0.902384	0.0673333	0.861838	0.012	0.16206	0.0658333	3	3	53946.7	5.9
B7Z4W5	B7Z4W5	KYAT1	General	0.147	0.092	0.031	-0.01	0.01	0.048	-0.207	-0.145	-0.188	0.034	-0.063	0.0575	0.82075	-0.074	0.00228102	-0.27	0.00681262	0.1895	15	13	58066.7	28.6
B7Z8V7	B7Z8V7	NADK2	General	0.113	0.054	0.056	-0.051	-0.092	-0.067	0.365	0.397	0.485	-0.163	-0.146	-0.1515	0.337844	-0.144333	0.00106195	0.341333	3.36e-05	-0.569167	2	20	34517.6	67.1
B7Z9C2	B7Z9C2	NAP1L1	General	0.064	0.022	0	0.046	-0.05	0.017	-0.038	0.005	-0.064	-0.297	-0.055	0.0035	0.948255	-0.0243333	0.175759	-0.061	0.374892	-0.0838333	6	27	40796.5	61.8
B7ZC32	B7ZC32	KIF28P	Mitochondria	-0.313	-0.006	0.225	-0.053	-0.213	0.108	0.495	0.236	0.269	-0.148	-0.12	-0.0065	0.993673	-0.0213333	0.0730681	0.364667	0.00251599	-0.424833	4	4	109165	5.6
B7ZKJ3	B7ZKJ3	EPHA5	Endoplasmic Reticulum	0.016	0.075	-0.045	0.003	0.139	0.022	-0.259	-0.375	-0.456	0.074	0.114	0.0905	0.940308	0.0393333	0.00285207	-0.378667	0.000345253	0.456167	27	25	116837	27.8
B7ZL88	B7ZL88	CO8	General	-0.26	-0.015	-0.21	-0.023	0.115	-0.082	0.205	0.16	0.097	0.034	-0.111	-0.0505	0.815969	0.165	0.0104154	0.315667	0.0108336	-0.1965	5	4	37418.3	10.1
B8ZZ87	B8ZZ87	MZT2B	General	0.024	0.052	0.026	0.027	-0.033	0.012	-0.122	-0.06	-0.031	0.023	-0.003	0.0325	0.906424	-0.032	0.0413581	-0.105	0.0653052	0.0885	13	7	22452.3	50.4
B8ZZC8	B8ZZC8	METTL5	General	0.039	-0.082	-0.073	-0.106	-0.006	-0.047	0.17	0.211	0.122	0.063	-0.017	0.0455	0.984552	-0.0143333	0.0101215	0.206333	0.018607	-0.137167	14	8	28115.2	32.3
B8ZZI4	B8ZZI4	CCDC150	General	0.028	0.029	-0.079	0.016	0.025	-0.034	0.044	-0.092	-0.05	-0.152	-0.015	0.0095	0.9867	0.00966667	0.701123	-0.0253333	0.784786	-0.0198333	4	3	69122.3	3.2
B8ZZN3	B8ZZN3	STK16	General	-0.008	-0.002	-0.134	-0.052	0.137	-0.085	0.128	0.122	0.2	0.074	-0.045	-0.1495	0.945266	0.048	0.013957	0.198	0.0273837	-0.190167	3	3	39991.1	7.1
B8ZZN6	B8ZZN6	SUMO1	General	-0.027	0.011	0.009	0.02	-0.135	-0.004	0.195	0.289	0.239	-0.123	-0.099	-0.0655	0.940308	-0.0373333	0.00207273	0.243333	0.000289238	-0.336833	26	12	16701.5	47.9
B9EGE7	B9EGE7	ZNF507	General	-0.006	0.008	0.024	0.008	-0.063	-0.026	0.181	0.251	0.192	-0.135	-0.074	-0.0505	0.896546	-0.0356667	0.00305101	0.199333	0.000580693	-0.2945	14	13	108209	12.6
C9J6P4	C9J6P4	ZC3HAV1	General	-0.02	-0.035	0.001	-0.028	-0.097	-0.02	0.184	0.249	0.237	-0.027	-0.037	-0.0135	0.921259	-0.0303333	0.00138356	0.241333	0.000613326	-0.249167	143	72	115909	73.8
C9J6U3	C9J6U3	DIAPH2	General	0.099	-0.051	-0.051	-0.024	0.081	-0.072	-0.015	-0.031	-0.196	0.049	0.071	0.1385	0.997735	-0.004	0.352752	-0.0796667	0.0351531	0.166833	9	5	126335	3.2
C9J6X6	C9J6X6	ZNF385C	General	0.054	0.095	-0.05	0.111	-0.081	-0.002	-0.036	-0.245	-0.335	0.081	0.227	-0.0815	0.97357	-0.0236667	0.0508754	-0.238333	0.0422677	0.280833	4	3	53244.3	3.6
C9JA08	C9JA08	NMD3	General	0.023	-0.021	-0.009	-0.02	-0.057	-0.057	0.199	0.23	0.139	-0.062	-0.101	0.0145	0.880682	-0.0423333	0.00512117	0.191667	0.00275	-0.238833	68	32	61380	55.5
C9JBG5	C9JBG5	SIDT2	General	-0.002	0.068	-0.016	0.1	0.074	0.091	-0.168	-0.178	-0.157	-0.008	0.052	0.0645	0.805167	0.0716667	0.00496393	-0.184333	0.00171508	0.203833	7	5	98096.7	6.9
C9JC87	C9JC87	AP4M1	General	0.006	-0.04	0.004	-0.024	0.075	0.047	-0.027	-0.019	-0.167	-0.003	0	0.0155	0.896546	0.0426667	0.323757	-0.061	0.196335	0.0751667	14	12	50975.2	30.4
C9JCC6	C9JCC6	DRAP1	General	0.037	0.018	0.116	0.03	-0.065	-0.068	-0.021	0.036	-0.019	-0.128	-0.087	-0.1045	0.805259	-0.0913333	0.243567	-0.0583333	0.0269584	-0.105167	23	7	23318.5	39.1
C9JEA7	C9JEA7	PLCD4	General	-0.103	0.251	-0.03	0.076	0.095	-0.074	-0.213	-0.102	0.092	0.043	-0.033	0.0765	0.997735	-0.007	0.442624	-0.113667	0.281051	0.103167	4	3	92094.7	3.9
C9JEH3	C9JEH3	AAMP	General	0.012	0.007	0.015	-0.021	-0.073	-0.085	0.329	0.39	0.358	-0.05	-0.099	-0.0225	0.780769	-0.071	0.000247668	0.347667	8.66e-05	-0.416167	29	17	47505.8	40.9
C9JEJ2	C9JEJ2	PCYT1A	General	-0.007	0.032	0.07	0.023	-0.021	-0.017	-0.044	0.046	-0.023	-0.104	-0.084	-0.0345	0.901243	-0.0366667	0.430241	-0.0386667	0.166106	-0.0671667	36	24	43605.5	65.2
C9JG08	C9JG08	C2orf16	General	-0.019	0.039	-0.006	0.167	0.054	-0.017	-0.115	0.237	0.082	-0.073	-0.027	-0.0245	0.890021	0.0633333	0.570143	0.0633333	0.287145	-0.1095	7	7	602770	1.6
C9JIF9	C9JIF9	APEH	General	0.207	0.058	0.029	0.109	0.081	-0.025	-0.382	-0.371	-1.153	0.041	0.044	0.0815	0.944703	-0.043	0.0281996	-0.733333	0.019567	0.690833	69	32	82756.6	56.1
C9JJ19	C9JJ19	MRPS34	General	-0.037	0.063	-0.014	-0.029	0.022	-0.078	0.155	0.113	0.228	-0.023	-0.071	-0.0195	0.940308	-0.0323333	0.0229851	0.161333	0.00401274	-0.203167	40	18	26388.7	73.3
C9JJN9	C9JJN9	VPS8	General	-0.007	0	-0.014	0.023	0.037	0.029	-0.053	-0.033	-0.108	0.054	0.004	-0.0245	0.881235	0.0366667	0.169682	-0.0576667	0.116111	0.0758333	42	33	163853	26.5
C9JLB7	C9JLB7	OXNAD1	General	0.045	-0.003	-0.226	-0.036	-0.008	-0.058	0.239	0.218	0.31	-0.013	-0.007	0.0335	0.975527	0.0273333	0.0133401	0.317	0.00106643	-0.251167	14	11	37405.6	36
C9JLR9	C9JLR9	C11orf95	General	-0.03	0.016	-0.189	-0.018	0.004	0.013	0.042	-0.078	0.143	0.091	0.075	-0.1535	0.89568	0.0673333	0.293318	0.103333	0.763519	-0.0315	7	6	74051.9	9.1
C9JNU9	C9JNU9	USP4	General	0.259	-0.035	0.008	0.059	0.023	0.073	-0.118	-0.162	-0.269	0.022	0.083	0.1015	0.982599	-0.0256667	0.0427037	-0.260333	0.0034085	0.251833	8	11	42388.2	29.7
C9JRZ6	C9JRZ6	CHCHD3	General	-0.027	0.031	-0.041	0.106	0.027	-0.013	0.09	-0.034	0.02	-0.085	0.031	-0.0045	0.886515	0.0523333	0.489298	0.0376667	0.439292	-0.0448333	56	24	27037.8	72.4
C9JXA7	C9JXA7	LAMTOR4	General	0.156	-0.073	-0.181	-0.27	-0.094	-0.021	-0.04	0.023	-0.034	0.135	0.121	0.0865	0.921259	-0.0956667	0.89329	0.0156667	0.0127042	0.131167	6	2	14347.1	12.4
C9JY79	C9JY79	SPTBN4	General	0.036	0.076	-0.043	-0.124	0.097	-0.055	0.024	-0.036	-0.156	0.057	0.073	0.0505	0.940308	-0.0503333	0.284844	-0.079	0.0764737	0.116167	8	13	290254	3.9
C9JYJ0	C9JYJ0	RAD51B	General	-0.01	-0.124	-0.145	-0.122	-0.061	-0.211	0.225	0.415	0.163	0.225	0.015	-0.0215	0.944801	-0.0383333	0.00780601	0.360667	0.0874705	-0.194833	5	4	47229.5	10.8
C9JYS5	C9JYS5	TVP23C	General	-0.21	0.117	-0.232	-0.075	0.023	-0.064	0.064	0.126	0.105	0.091	0.032	-0.0345	0.944703	0.0696667	0.112807	0.206667	0.190049	-0.0688333	4	3	23865.1	13.1
C9K0I0	C9K0I0	TSKS	General	0.043	0.04	-0.033	-0.128	0.005	-0.018	0.047	-0.166	-0.102	-0.023	0.002	0.0835	0.886082	-0.0636667	0.249833	-0.0903333	0.213345	0.0945	6	5	43555.1	9.4
D3DTX6	D3DTX6	PPP1R9B	General	-0.017	0.054	0.128	0.089	-0.048	0.003	-0.06	-0.078	0.007	-0.088	-0.044	-0.0665	0.940308	-0.0403333	0.123328	-0.0986667	0.61619	-0.0225	57	37	89503.8	48.2
D3YTA9	D3YTA9	PPP3R1	General	0.045	0.018	0.063	0.013	0.003	-0.004	-0.047	-0.041	-0.077	-0.045	-0.05	0.0435	0.88556	-0.038	0.0313067	-0.097	0.411038	0.0378333	33	15	21730.4	72.4
D4PHA4	D4PHA4	GPBP1	General	-0.036	-0.017	0.01	-0.076	-0.039	0.066	-0.071	0.084	0.016	-0.028	-0.032	0.0165	0.997735	-0.002	0.686617	0.024	0.677128	-0.0241667	16	13	55695.9	35.2
D6RE79	D6RE79	MFSD10	General	-0.011	-0.009	-0.183	-0.2	0.316	-0.011	0.016	-0.159	-0.337	0.315	0.184	0.2515	0.940308	0.102667	0.46096	-0.0923333	0.00558889	0.410167	3	3	51057.9	5.6
D6REX3	D6REX3	SEC31A	General	0.038	-0.034	-0.001	0.032	0.009	-0.013	-0.098	-0.035	-0.053	0.034	0.023	0.0775	0.985852	0.00833333	0.166122	-0.063	0.0289476	0.106833	169	62	137194	53.4
D6RFG8	D6RFG8	DCK	General	0.005	-0.074	-0.095	-0.084	0.016	0.022	0.02	0.03	-0.12	0.123	0.105	0.0355	0.929691	0.0393333	0.646257	0.0313333	0.0935349	0.111167	29	15	37277.6	41.6
D6RFL2	D6RFL2	LYRM9	General	0.093	-0.069	0.068	0.035	-0.124	-0.064	0.155	0.117	0.014	-0.142	-0.288	-0.1245	0.886082	-0.0816667	0.391487	0.0646667	0.0049832	-0.280167	3	2	10908.4	17.3
D6RG30	D6RG30	ASTE1	General	-0.05	0.074	0.073	-0.036	0.051	0.007	-0.055	0.056	0.013	-0.037	-0.135	-0.0625	0.959251	-0.025	0.666943	-0.0276667	0.137169	-0.0828333	3	3	81288.2	5.5
D6RGG3	D6RGG3	COL12A1	General	-0.002	0.019	0.021	-0.02	-0.03	-0.012	0.047	-0.017	0.002	-0.028	0.014	0.0345	0.886515	-0.0333333	0.961801	-0.002	0.933087	-0.00383333	114	82	334394	30.3
D6RGH6	D6RGH6	MCIDAS	General	-0.033	0.028	-0.039	0.031	0.038	0.057	0.004	0.143	0.06	0.031	-0.076	-0.2375	0.826133	0.0566667	0.161724	0.0836667	0.0869767	-0.163167	2	2	42346.8	4.1
D6RIF6	D6RIF6	SLAIN2	General	-0.042	0.074	0.061	0.046	-0.04	-0.077	0.116	-0.008	-0.023	-0.152	-0.058	-0.0415	0.901286	-0.0546667	0.970552	-0.00266667	0.0932246	-0.112167	3	12	44769.9	28.7
D6RJF0	D6RJF0	CENPK	General	-0.057	-0.047	0.086	0.039	0.012	-0.067	-0.016	-0.041	-0.016	-0.002	-0.044	0.1055	0.998591	0.000666667	0.761036	-0.0183333	0.419521	0.0441667	4	12	24344.8	55.8
E3W994	E3W994	CLASP2	General	-0.022	0.102	0.061	-0.032	-0.039	0.042	-0.104	-0.073	0.138	-0.239	-0.058	-0.1025	0.886515	-0.0566667	0.517084	-0.06	0.208829	-0.120167	3	67	139661	59.9
E5KP25	E5KP25	MUTYH	General	0.026	0.094	0.148	-0.046	-0.017	0.03	-0.125	-0.063	0.009	-0.057	-0.03	-0.0745	0.785362	-0.100333	0.0430962	-0.149	0.916776	0.00583333	8	8	61112.3	18
E5RI87	E5RI87	RNF130	General	-0.064	0.249	-0.413	-0.083	0.246	-0.192	0.091	-0.009	-0.242	0.269	0.021	-0.2625	0.977806	0.0663333	0.924846	0.0226667	0.728962	0.0625	2	2	47187.4	6.9
E5RIM7	E5RIM7	ATO	General	-0.02	0.041	0.13	0.13	-0.071	-0.054	-0.003	0.151	0.135	-0.066	-0.173	-0.1195	0.943258	-0.0486667	0.55754	0.044	0.0101127	-0.213833	18	9	8045.2	89
E5RJD8	E5RJD8	TBCA	General	0.063	-0.069	0.044	0.056	-0.015	-0.012	-0.012	0.03	0.086	-0.108	-0.148	-0.0405	0.997735	-0.003	0.727048	0.022	0.0295117	-0.1335	43	15	14420.2	60.5
E5RJF8	E5RJF8	CETN3	General	-0.027	-0.009	0.023	-0.004	0.009	-0.068	0.109	0.048	0.047	-0.118	0.013	-0.1125	0.966475	-0.0166667	0.107122	0.0723333	0.031442	-0.1405	9	8	22480.1	39.7
E5RK69	E5RK69	ANXA6	General	-0.098	0.085	0.011	0.105	0.192	-0.211	-0.079	0.059	-0.392	0.03	-0.164	0.0895	0.985852	0.0293333	0.36882	-0.136667	0.40678	0.1225	3	44	51946.9	72.6
E7E7	E7E7	EIF4B	General	0.073	-0.019	0.03	0.085	-0.008	0.123	-0.172	-0.117	-0.042	0.017	-0.028	0.0475	0.936766	0.0386667	0.040954	-0.138333	0.0426411	0.1225	278	105	69753.6	83.2
E7E8	E7E8	MPV17	General	-0.092	0.119	-0.163	-0.187	0.25	-0.019	0.048	-0.002	0.027	0.163	-0.057	-0.0885	0.966493	0.06	0.461318	0.0696667	0.834514	-0.0185	3	3	21796.1	11.5
E7EPN9	E7EPN9	PRRC2C	General	-0.005	0.015	0.02	0.025	-0.016	0.011	-0.048	-0.031	-0.01	-0.037	-0.006	0.0155	0.996126	-0.00333333	0.272684	-0.0396667	0.60552	0.0205	347	163	309342	54.6
E7EPT4	E7EPT4	NDUFV2	General	0.065	0.093	0.003	-0.027	-0.017	-0.054	0.202	0.183	0.223	-0.155	-0.17	-0.1015	0.748262	-0.0863333	0.0123863	0.149	0.000158105	-0.344833	34	14	28249	60.3
E7EQ45	E7EQ45	AP5M1	General	0.031	-0.043	0.014	0.011	0.013	0.062	-0.078	0.011	0.004	0.01	0.002	-0.0055	0.937011	0.028	0.668804	-0.0216667	0.605533	0.0231667	6	6	57092.2	16
E7EQ69	E7EQ69	NAA50	General	0.046	-0.024	-0.006	-0.028	-0.003	-0.026	-0.014	0.045	0.017	0.029	-0.057	0.0625	0.940308	-0.0243333	0.811677	0.0106667	0.93369	-0.0045	48	17	19539.1	76.1
E7EQR8	E7EQR8	YIPF3	General	-0.069	0.057	-0.062	0.005	0.024	-0.001	0.01	-0.025	-0.07	0.043	0.017	0.0545	0.937772	0.034	0.953062	-0.00366667	0.13132	0.0665	11	6	39116.7	25
E7ERI8	E7ERI8	CLASP2	General	0.007	0.007	0.003	-0.04	0.016	0.105	0.02	-0.031	-0.088	0.084	0.028	0.0105	0.966475	0.0213333	0.402333	-0.0386667	0.15185	0.0738333	14	76	166709	58.4
E7ERR0	E7ERR0	KLHDC3	General	-0.077	-0.009	-0.085	-0.046	0.028	0.022	-0.089	0.008	0.037	0.058	-0.016	-0.0695	0.863756	0.0583333	0.457886	0.0423333	0.932471	0.0055	17	13	44578.8	43.1
E7ERS3	E7ERS3	ZC3H18	General	0.031	0.008	-0.018	0.013	-0.076	0.049	-0.035	-0.023	0.089	-0.078	0.01	0.0085	0.985852	-0.0116667	0.954008	0.00333333	0.606823	-0.0301667	83	49	109166	49.9
E7ESA6	E7ESA6	PTK2	General	0.062	0.021	0.044	0.042	0.025	0.037	-0.111	-0.088	-0.162	0.028	0	0.0155	0.985852	-0.00766667	0.00711456	-0.162667	0.0106438	0.134833	62	44	124992	46.6
E7ESJ3	E7ESJ3	ANKRD26	General	0.024	0.057	0.101	0.076	-0.004	0.066	-0.148	-0.094	-0.108	0.03	-0.03	-0.0265	0.972912	-0.0146667	0.00602601	-0.177333	0.0282888	0.107833	21	17	199524	10.2
E7ESW6	E7ESW6	WDR87	General	0.006	0.002	0.015	0.046	0.012	-0.016	0.039	0.017	-0.052	-0.015	0.03	0.0385	0.987709	0.00633333	0.892087	-0.00633333	0.728769	0.0165	11	11	340226	2.5
E7ESZ7	E7ESZ7	NDUFA10	General	0.071	0.085	-0.028	-0.031	0.003	-0.123	0.284	0.154	0.22	-0.098	-0.159	-0.1205	0.82075	-0.093	0.0231806	0.176667	0.000463281	-0.345167	33	21	45079.7	55.6
E7ETB3	E7ETB3	DNPEP	General	0.039	-0.018	0.011	0.009	0.015	-0.008	-0.121	-0.03	-0.056	0.042	-0.009	0.0445	0.988959	-0.00533333	0.108203	-0.0796667	0.0604662	0.0948333	29	16	55129.4	48
E7ETH0	E7ETH0	CFI	General	-0.04	0.018	0.156	-0.013	-0.235	0.016	0.353	0.255	0.487	-0.151	-0.124	-0.2495	0.881235	-0.122	0.0132754	0.320333	0.000431311	-0.539833	4	3	69020.4	4.5
E7ETU7	E7ETU7	MRPL3	General	-0.004	0.02	-0.179	-0.059	-0.011	-0.04	0.101	0.086	0.153	0.077	0.008	0.0385	0.985397	0.0176667	0.0517453	0.167667	0.116698	-0.0721667	44	21	41912.5	51.4
E7ETY2	E7ETY2	TCOF1	General	-0.222	0.014	0.125	-0.017	-0.094	-0.024	0.114	0.187	0.2	-0.179	-0.107	-0.2605	0.98803	-0.0173333	0.109292	0.194667	0.000804668	-0.349167	3	81	152530	46.2
E7EU96	E7EU96	CSNK2A1	General	-0.021	-0.078	-0.054	-0.024	-0.042	-0.012	0.121	0.119	0.076	0.027	0.033	0.0165	0.934234	0.025	0.00709119	0.156333	0.0550859	-0.0798333	67	27	45481.2	63.6
E7EUN2	E7EUN2	AGAP1	General	0.029	0.008	0.094	0.04	0.007	0.004	-0.028	-0.045	-0.09	-0.019	0.047	0.0205	0.940308	-0.0266667	0.0608423	-0.098	0.116662	0.0705	15	12	117700	13
E7EUS2	E7EUS2	CCDC110	General	0.146	0.073	0.235	0.047	-0.017	0.018	-0.025	-0.184	-0.136	-0.222	0.034	-0.0715	0.690099	-0.135333	0.0105471	-0.266333	0.757687	0.0285	4	4	97522.7	3.2
E7EV07	E7EV07	ARHGEF4	General	-0.076	-0.004	-0.084	0.003	-0.044	0.018	0.158	0.246	0.258	-0.026	0	0.0205	0.886082	0.047	0.00242159	0.275333	0.00222318	-0.2225	18	16	200418	10.6
E7EVA0	E7EVA0	MAP4	General	0.049	0.033	0.07	0.027	-0.028	0.006	-0.044	-0.032	-0.006	-0.092	-0.071	-0.0275	0.85009	-0.049	0.0590147	-0.078	0.370512	-0.0361667	363	142	246695	68.6
E7EVH7	E7EVH7		General	-0.074	0.076	-0.032	0.019	-0.024	0.061	0.162	0.047	0.224	-0.047	-0.038	-0.0345	0.952379	0.0286667	0.0728697	0.154333	0.0137521	-0.184167	7	46	84492.1	54
E7EWN3	E7EWN3	SETD5	General	-0.032	0.02	-0.01	0.028	-0.065	0.005	-0.036	-0.023	0.023	-0.028	-0.007	-0.0235	0.997353	-0.00333333	0.916087	-0.00466667	0.856793	-0.0075	12	12	161030	7.9
E7EWW0	E7EWW0	C16orf62	General	0.202	0.219	0.168	-0.018	-0.088	0.03	-0.156	-0.088	-0.117	0.038	-0.029	-0.0365	0.213224	-0.221667	0.000515124	-0.316667	0.0328263	0.111167	9	8	120266	11.3
E7EX59	E7EX59	PCCB	General	-0.012	0.024	-0.029	-0.04	0.032	-0.024	0.079	0.016	0.102	-0.034	-0.078	-0.0665	0.991698	-0.005	0.13367	0.0713333	0.0190292	-0.125167	21	15	62280.2	34.7
E7EX90	E7EX90	DCTN1	General	0.023	0.021	0.023	0.026	0.002	0.032	-0.073	-0.052	-0.087	-0.024	0.026	0.0095	0.997535	-0.00233333	0.0274926	-0.093	0.0740505	0.0745	170	82	139833	65.1
E9PAU2	E9PAU2	RAVER1	General	-0.024	0.061	0.052	0.041	-0.029	0.033	-0.1	-0.055	0.006	-0.087	0.016	-0.0385	0.972912	-0.0146667	0.15504	-0.0793333	0.814206	0.0131667	96	38	80090.6	70.5
E9PAV3	E9PAV3	NACA	General	0.043	-0.004	0.002	0.006	-0.047	0.01	-0.087	0.023	0.034	-0.033	-0.065	0.0095	0.940308	-0.024	0.665934	-0.0236667	0.727888	-0.0195	60	11	206102	5.1
E9PB77	E9PB77	ITGA2	General	-0.039	-0.089	-0.089	-0.159	0.172	-0.067	0.683	1.202	1.399	0.006	-0.002	0.0865	0.94848	0.0543333	0.00233926	1.167	0.00139474	-1.0645	4	21	70261.2	45.3
E9PBC6	E9PBC6	TACC2	General	0.026	0.051	0.062	-0.021	-0.094	-0.075	0.236	0.266	0.211	-0.174	-0.148	-0.1735	0.584955	-0.109667	0.00280113	0.191333	5.68e-05	-0.402833	106	81	304786	32.1
E9PBP6	E9PBP6	MTTP	Endoplasmic Reticulum	0.01	-0.05	0	-0.018	0.049	0.073	0.021	-0.044	0.07	-0.165	-0.185	-0.0125	0.886082	0.048	0.570335	0.029	0.0686731	-0.1365	3	3	103325	2.2
E9PC47	E9PC47	LIMK1	General	-0.048	-0.047	-0.012	-0.024	0.019	-0.033	0.116	0.297	0.243	0.065	-0.103	-0.0625	0.940308	0.023	0.00719056	0.254333	0.0108934	-0.252167	9	9	77009.3	12.9
E9PC69	E9PC69	MARK2	General	-0.013	-0.061	-0.062	-0.039	-0.052	-0.021	0.125	0.103	0.118	0.049	0.003	0.0245	0.985852	0.008	0.00503975	0.160667	0.0359486	-0.0898333	47	33	87089.2	47.1
E9PCW1	E9PCW1	GOSR1	General	-0.058	0.052	0.039	0.023	0.029	0	-0.003	-0.11	0.044	-0.118	-0.019	0.0535	0.990411	0.00633333	0.618695	-0.034	0.94904	-0.00483333	30	19	28406.9	65.3
E9PD25	E9PD25	TLL1	General	0.021	-0.007	0.006	-0.075	0.173	0.148	-0.12	-0.235	-0.102	0.065	0.14	0.0905	0.906202	0.0753333	0.0208222	-0.159	0.00278981	0.250833	4	4	119616	5.9
E9PD50	E9PD50	SMG7	General	0.023	-0.01	0.035	-0.012	-0.035	-0.003	0.041	-0.01	-0.005	-0.042	-0.085	-0.0485	0.896546	-0.0326667	0.860128	-0.00733333	0.110634	-0.0671667	38	26	131484	23.2
E9PDK2	E9PDK2	UNKL	General	0.023	-0.019	0.003	0.02	0.002	-0.001	-0.028	-0.004	-0.048	0.071	0.038	0.0285	0.989839	0.00466667	0.441018	-0.029	0.0811674	0.0725	9	9	81190.3	14.5
E9PDN6	E9PDN6	CNTNAP4	General	0.126	-0.062	0.108	-0.08	-0.154	0.01	0.157	-0.035	0.145	-0.071	-0.041	-0.0205	0.815969	-0.132	0.74655	0.0316667	0.0742825	-0.133167	4	2	147612	1.3
E9PEJ6	E9PEJ6	ATP11A	General	-0.012	-0.036	-0.038	-0.031	0.013	-0.018	0.089	0.006	0.015	0.024	0.029	0.0365	0.952379	0.0166667	0.15086	0.0653333	0.881108	-0.00683333	21	18	137500	13
E9PES4	E9PES4	KIF3A	General	0.034	-0.042	-0.02	-0.014	-0.005	-0.006	0.086	0.076	0.064	0.021	-0.01	-0.0175	0.99832	0.001	0.0642554	0.0846667	0.0571279	-0.0775	38	31	83192.7	43.1
E9PF32	E9PF32	DENND3	General	0.075	0.069	0.02	0.086	0.057	0.151	-0.501	-0.501	-0.445	0.07	0.01	-0.0415	0.895252	0.0433333	7.39e-05	-0.537	6.67e-05	0.495167	14	13	146370	11.5
E9PF82	E9PF82	CAMK2D	General	0.081	0.049	0.086	0.134	-0.064	0.225	-0.128	-0.075	-0.084	-0.045	-0.047	0.0285	0.977806	0.0263333	0.00488994	-0.167667	0.112068	0.0745	2	27	60631.1	48.9
E9PFD3	E9PFD3	FOXP1	General	-0.004	0.041	0.119	-0.057	-0.049	-0.004	0.161	0.134	0.113	-0.076	-0.119	-0.0935	0.805167	-0.0886667	0.123925	0.084	0.000745683	-0.232167	10	11	76826.5	22.6
E9PG19	E9PG19	FCHSD2	General	0.01	0.014	0.038	0.039	-0.011	0.054	0.003	0.032	0.054	0.016	-0.166	0.0035	0.987709	0.00666667	0.817299	0.009	0.242101	-0.0785	8	7	87326.4	8.6
E9PG32	E9PG32	DNAH12	General	0.079	-0.056	-0.025	0.029	0.036	-0.004	0.057	-0.147	-0.09	0.045	0.147	0.0665	0.966475	0.021	0.471205	-0.0593333	0.0652001	0.146167	11	9	458312	1.9
E9PGC5	E9PGC5	PTPRK	General	-0.017	0.028	0.004	0.008	0.009	0.005	-0.009	-0.028	-0.052	0.058	0.023	-0.0135	0.997735	0.00233333	0.361005	-0.0346667	0.215027	0.0521667	34	27	168023	22
E9PGC8	E9PGC8	MAP1A	General	-0.03	0.012	-0.043	0.104	0.041	0.131	-0.113	-0.095	-0.051	0.03	0.155	-0.0715	0.628784	0.112333	0.132419	-0.066	0.105164	0.124167	11	11	332907	4.3
E9PGT1	E9PGT1	TSN	General	-0.011	0.007	0.02	0.02	-0.004	-0.015	-0.058	-0.025	0.006	-0.033	-0.072	-0.0915	0.989733	-0.005	0.429476	-0.031	0.343015	-0.0398333	43	20	25685.9	66.8
E9PHG5	E9PHG5	CYP20A1	General	-0.06	-0.003	-0.094	-0.011	0.037	0.011	0.036	-0.03	-0.092	0.138	0.188	0.0615	0.82075	0.0646667	0.685155	0.0236667	0.0255451	0.157833	18	13	53847	34.4
E9PI68	E9PI68	SPCS2	General	-0.166	-0.025	0.016	0.069	0.068	0.019	0.066	-0.039	-0.021	-0.009	0.101	-0.0155	0.808018	0.110333	0.413633	0.0603333	0.695377	0.0235	36	14	28787.6	47
E9PIL2	E9PIL2	ANKRD42	General	0.002	-0.025	0.12	0.025	-0.021	0.172	0.148	-0.089	-0.018	-0.058	-0.117	-0.0155	0.972912	0.0263333	0.845856	-0.0186667	0.330333	-0.0771667	4	3	59764.7	6
E9PIT3	E9PIT3	F2	General	-0.043	-0.333	-0.291	-0.153	0.098	-0.166	1.356	1.513	1.348	0.177	0.054	0.0675	0.885527	0.148667	4.87e-05	1.628	5.37e-06	-1.30617	3	6	66833.7	16.2
E9PJD7	E9PJD7	CYHR1	General	-0.002	-0.083	-0.136	-0.004	0.013	0.033	-0.048	-0.049	-0.068	0.082	0.167	0.0895	0.805167	0.0876667	0.729203	0.0186667	0.00532424	0.167833	19	16	44953.5	44.3
E9PKB1	E9PKB1	CCDC15	General	0.191	0.186	-0.355	-0.07	0.004	0.078	-0.223	-0.512	-0.709	0.335	0.111	0.0115	0.998591	-0.00333333	0.0667692	-0.488667	0.00517437	0.633833	5	4	112563	3
E9PKC0	E9PKC0	PLEKHA7	General	-0.029	-0.02	-0.004	0.078	0.012	0.091	-0.139	-0.152	-0.031	0.125	0.025	0.0725	0.776506	0.078	0.107122	-0.0896667	0.0118282	0.1815	14	14	144992	9.9
E9PKP7	E9PKP7	UBTF	General	0	-0.002	0.025	-0.006	-0.09	-0.005	0.038	0.003	0.07	-0.153	-0.001	-0.0325	0.8917	-0.0413333	0.45871	0.0293333	0.107642	-0.0991667	133	58	87777.2	60.6
E9PL24	E9PL24	PDE4DIP	General	0.045	0.031	0.03	0.096	0.029	0.076	-0.178	-0.19	-0.149	0.057	0.083	0.0205	0.907589	0.0316667	0.001537	-0.207667	0.000989163	0.225833	52	36	128317	35.3
E9PMS6	E9PMS6	LMO7	General	0.012	-0.015	0.098	-0.022	-0.087	-0.039	0.159	0.106	0.241	-0.209	-0.086	-0.0835	0.815969	-0.081	0.0550248	0.137	0.00238371	-0.294833	6	105	146105	76
E9PN76	E9PN76	RNF214	General	0.008	0.001	-0.083	-0.064	-0.002	-0.068	0.065	-0.013	0.02	0.059	-0.002	-0.0445	0.965012	-0.02	0.336149	0.0486667	0.69775	-0.0198333	3	24	58140.8	49.1
E9PNI7	E9PNI7	PARP10	General	0.052	0.095	0.047	0.042	0.043	0.02	-0.215	-0.111	-0.306	0.001	-0.027	-0.0045	0.909186	-0.0296667	0.0063968	-0.275333	0.0125421	0.2005	12	12	112417	15.9
E9PNW5	E9PNW5	C4orf50	General	0.449	-0.02	-0.122	-0.037	-0.125	0.755	-0.153	-0.638	0.277	0.102	-0.097	0.3515	0.977806	0.0953333	0.406122	-0.273667	0.297212	0.290167	5	3	168912	2.7
E9PNY8	E9PNY8	ARFGAP2	General	0.12	0.016	-0.097	-0.055	0.005	0	-0.011	-0.03	-0.235	0.084	0.058	0.0265	0.966475	-0.0296667	0.313153	-0.105	0.075177	0.148167	9	5	12502.4	50.9
E9PP16	E9PP16	PPFIBP2	General	0.073	0.087	0.063	0.105	-0.009	0.063	-0.619	-0.485	-0.521	0.024	0.071	0.0155	0.955048	-0.0213333	0.000101272	-0.616	4.85e-05	0.5785	20	23	81835.4	36
E9PPT0	E9PPT0	RPS2	General	0.08	-0.053	-0.272	-0.171	0.049	0.038	0.035	-0.065	-0.185	0.072	0.22	0.0445	0.966475	0.0536667	0.942114	0.01	0.0529857	0.183833	7	16	21136.4	66.4
E9PR17	E9PR17	CD59	General	-0.046	0.064	0.009	0.076	0.15	-0.018	-0.094	-0.225	-0.252	0.001	0.19	0.1195	0.901243	0.0603333	0.0206274	-0.199333	0.00564966	0.293833	12	5	15156	36.9
E9PR30	E9PR30	FAU	General	0.05	0.041	0.085	0.151	0.024	0.097	-0.181	-0.203	-0.034	-0.041	-0.082	0.0305	0.940308	0.032	0.0178736	-0.198	0.12643	0.1085	20	8	10904.6	52
E9PRW0	E9PRW0	TRPM5	General	0.524	-0.032	-0.29	0.003	-0.065	-0.031	0.06	-0.194	0.001	0.063	-0.006	-0.0185	0.966475	-0.0983333	0.674513	-0.111667	0.493567	0.0571667	9	5	133385	6.6
E9PRY8	E9PRY8	EEF1D	General	0.012	-0.036	0.028	0.073	-0.019	-0.001	-0.051	-0.021	0.01	-0.053	-0.057	0.0035	0.972557	0.0163333	0.608191	-0.022	0.736957	-0.0148333	140	49	77196.2	60.5
E9PSH4	E9PSH4	MAF1	General	-0.038	-0.046	0.007	0.006	-0.019	-0.068	0.056	0.316	0.125	-0.061	0.033	-0.0395	0.997839	-0.00133333	0.0558984	0.191333	0.0473418	-0.188167	5	3	32485.4	13.6
E9PSI1	E9PSI1		General	0.007	-0.006	0.033	0.077	0.029	0.027	-0.081	-0.048	-0.045	-0.03	-0.046	-0.0105	0.901488	0.033	0.0859934	-0.0693333	0.438189	0.0291667	32	19	92899	19.7
F1T0I1	F1T0I1	SEC16A	General	0.002	0.019	0.042	0.036	0.011	0.035	-0.07	-0.061	-0.034	-0.021	0.027	-0.0105	0.9867	0.00633333	0.0647721	-0.076	0.176922	0.0535	135	81	251018	45.3
F2Z2U4	F2Z2U4	TRRAP	General	-0.032	-0.051	-0.09	-0.058	-0.034	0	0.21	0.192	0.127	0.05	0.082	-0.0115	0.935064	0.027	0.00247242	0.234	0.0211746	-0.136167	210	151	440410	46
F2Z2W7	F2Z2W7	TRMT2A	General	-0.012	-0.03	-0.002	-0.003	-0.024	-0.005	0.009	0.106	0.065	-0.03	-0.027	-0.0205	0.991684	0.004	0.116056	0.0746667	0.0702459	-0.0858333	54	34	71860.7	54.5
F2Z2X0	F2Z2X0	NME4	General	0.16	0.017	-0.131	-0.052	-0.018	0.008	0.228	0.291	0.659	-0.043	-0.012	0.0955	0.966475	-0.036	0.0486397	0.377333	0.0206129	-0.379167	6	5	25687.9	29.1
F2Z2X4	F2Z2X4	XPO4	General	0.013	-0.047	-0.028	-0.036	0.036	0.045	0.01	-0.018	-0.087	0.054	0.019	-0.0105	0.91589	0.0356667	0.825957	-0.011	0.270426	0.0525	55	38	131406	37.7
F5GX28	F5GX28	KDM4B	General	0.06	0.063	-0.006	-0.002	-0.035	0.04	-0.249	-0.052	-0.127	0.025	0.036	0.0975	0.906424	-0.038	0.0336826	-0.181667	0.0174268	0.1955	13	12	127964	11.6
F5GXF0	F5GXF0	NR4A1	General	-0.022	-0.016	-0.04	-0.034	-0.077	-0.045	0.327	0.356	0.369	0.013	-0.055	-0.1265	0.920152	-0.026	0.000154076	0.376667	0.000227988	-0.406833	13	12	71705.2	19.3
F5GXJ1	F5GXJ1	NDUFS7	General	-0.048	0.076	-0.003	-0.009	0.027	-0.104	0.076	0.095	0.26	-0.137	-0.2	-0.0545	0.942611	-0.037	0.105847	0.135333	0.00708973	-0.274167	16	8	25725.5	33.4
F5GXR6	F5GXR6	MYO18B	General	0.039	-0.252	-0.289	-0.306	0.018	0.036	0.13	-0.103	-0.212	0.197	0.172	0.0635	0.948255	0.0833333	0.488573	0.105667	0.0761515	0.205833	4	4	287506	1.5
F5GXW1	F5GXW1	DOCK4	General	0.014	0.086	-0.012	0.006	0.02	-0.037	-0.074	0.049	0.033	0.021	-0.066	0.0835	0.924508	-0.033	0.661045	-0.0266667	0.882386	0.0101667	5	4	127330	3.3
F5GY05	F5GY05	FAM120B	General	-0.006	0.019	0.016	-0.032	0.001	-0.007	-0.024	0.02	-0.024	0.021	-0.037	-0.0005	0.937011	-0.0223333	0.612741	-0.019	0.930068	0.00383333	44	34	108169	40.9
F5GYJ5	F5GYJ5	SDHAF2	General	0	0.07	0	0.065	-0.022	-0.003	-0.121	-0.066	-0.017	-0.067	-0.029	-0.0255	0.985852	-0.01	0.0981958	-0.0913333	0.558023	0.0275	33	14	18444.8	71.4
F5GYQ1	F5GYQ1	ATP6V0D1	General	0.012	0.047	0.015	-0.034	-0.064	-0.016	0.089	0.057	0.047	-0.066	0.029	-0.0355	0.805167	-0.0626667	0.291563	0.0396667	0.0706414	-0.0885	38	18	45115.6	49.7
F5GZB4	F5GZB4	LOXHD1	General	0.013	0.041	-0.013	-0.098	0.016	0.026	-0.085	0.001	0.046	-0.035	-0.088	0.0845	0.940308	-0.0323333	0.629106	-0.0263333	0.997973	-0.000166667	12	8	254437	4.4
F5GZI3	F5GZI3	PARD3	General	-0.072	-0.067	0.048	0.015	-0.057	-0.017	0.073	0.059	0.133	-0.031	-0.057	0.0205	0.9867	0.0106667	0.0637385	0.118667	0.0353997	-0.110833	4	35	82290.9	51
F5GZS6	F5GZS6	SLC3A2	General	-0.053	0.102	-0.024	0.047	0.193	0.007	-0.229	-0.363	-0.296	0.082	0.173	0.1195	0.901243	0.074	0.00507198	-0.304333	0.000258752	0.420833	165	48	65042.5	77.2
F5H0F9	F5H0F9	ANAPC5	General	-0.032	-0.011	-0.021	-0.019	0.012	-0.011	0.046	0.032	-0.023	0.021	0.075	-0.0265	0.95358	0.0153333	0.323732	0.0396667	0.926437	0.00483333	49	33	84358.5	45.8
F5H0R1	F5H0R1	TUT1	General	-0.032	-0.05	-0.044	-0.012	-0.055	-0.009	0.222	0.253	0.253	-0.07	-0.045	-0.0265	0.952379	0.0166667	0.000399628	0.284667	0.00024235	-0.289833	49	34	99802.8	41.8
F5H1N7	F5H1N7	KIAA1211	General	-0.039	0.044	0.012	-0.005	-0.032	-0.016	-0.016	0.05	0.065	-0.063	-0.013	-0.0745	0.943258	-0.0233333	0.574301	0.0273333	0.0866556	-0.0831667	49	42	137011	40.2
F5H1S1	F5H1S1	PIGB	General	0.094	-0.002	0.053	0.134	0.025	0.025	-0.081	-0.186	-0.307	0.083	0.007	0.0485	0.985852	0.013	0.0188319	-0.239667	0.0111588	0.2375	3	2	65968.1	3.2
F5H211	F5H211	ATXN3	General	-0.002	-0.036	0.075	0.068	0.006	0.004	-0.007	-0.03	-0.047	0.038	-0.084	-0.0245	0.979423	0.0136667	0.4085	-0.0403333	0.932038	0.0045	16	13	42705	36.2
F5H269	F5H269	DMXL1	General	0.103	0.071	0.065	0.006	0.019	0.037	-0.227	-0.221	-0.231	0.075	0.054	0.0315	0.805167	-0.059	0.000317498	-0.306	0.000247216	0.279833	58	51	344061	22.3
F5H2E7	F5H2E7	LTBR	General	-0.266	0.017	0.123	0.098	-0.102	-0.369	0.244	0.528	0.383	-0.392	-0.257	-0.0605	0.95776	-0.0823333	0.022435	0.427	0.00161145	-0.6215	4	8	31525.6	45.2
F5H2V9	F5H2V9	DD1	General	0.156	0.011	-0.146	0.009	-0.034	0.037	-0.264	-0.291	-0.385	0.034	0.043	0.1235	0.997903	-0.003	0.0162952	-0.320333	0.000402232	0.380167	6	3	8898.1	25.6
F5H2X7	F5H2X7	CIZ1	General	-0.051	-0.039	0.007	-0.012	-0.056	-0.066	0.794	0.857	0.751	-0.074	-0.014	-0.0395	0.959251	-0.017	2.93e-05	0.828333	6.29e-06	-0.843167	49	33	107381	52.8
F5H527	F5H527	SSH2	General	-0.012	-0.075	-0.045	-0.04	-0.037	0.096	-0.017	0.019	0.026	0.061	0.02	-0.0445	0.906424	0.0503333	0.198765	0.0533333	0.953851	0.00283333	14	12	162970	10
F5H5D3	F5H5D3	TUBA1C	General	0.047	-0.071	-0.035	-0.044	-0.066	-0.019	-0.054	0.047	0.065	0.043	-0.04	0.0195	0.952379	-0.0233333	0.527899	0.039	0.837753	-0.0118333	56	41	58642	73.7
F5H619	F5H619	HEATR5A	General	-0.001	-0.016	-0.01	-0.025	0.03	0.031	-0.064	-0.06	-0.121	0.078	0.079	-0.0055	0.943258	0.021	0.0872398	-0.0726667	0.0203316	0.132167	54	43	226066	23.8
F5H6I7	F5H6I7	ATL3	General	-0.155	-0.071	0.14	0.085	-0.045	-0.041	0.146	0.16	0.254	-0.216	-0.146	-0.2405	0.979265	0.0283333	0.0611992	0.215333	0.000318972	-0.3875	3	27	59228.4	56
F5H7W8	F5H7W8	C12orf43	General	-0.024	0.013	0.049	-0.001	-0.117	0.029	0.012	0.125	0.088	-0.053	0.01	-0.1105	0.923071	-0.0423333	0.241912	0.0623333	0.0472821	-0.126167	13	12	31921.4	53.5
F5H8B4	F5H8B4	UTY	General	-0.001	0.055	-0.045	0.076	0.019	0.012	-0.115	-0.065	-0.022	-0.063	0.104	0.0105	0.934796	0.0326667	0.192651	-0.0703333	0.18438	0.0845	5	7	162323	5.3
F5H8D7	F5H8D7	XRCC1	General	-0.035	0.078	0.007	0.067	0.004	0.043	-0.087	0	-0.134	0.009	0.105	-0.0975	0.959251	0.0213333	0.162915	-0.0903333	0.289805	0.0791667	2	27	66297.6	40.5
F6Q0Y6	F6Q0Y6	MPP4	General	-0.227	0.23	0.118	-0.125	0.016	-0.098	0.002	0.274	0.341	-0.178	-0.095	0.0605	0.921857	-0.109333	0.361201	0.165333	0.0438909	-0.2765	3	3	66786.3	10
F6QMI7	F6QMI7	DST	General	-0.076	-0.039	-0.043	0.074	-0.07	0.051	-0.051	-0.14	-0.196	0.08	0.083	0.0615	0.863756	0.071	0.18633	-0.0763333	0.00539746	0.203833	9	239	636851	45.3
F6SYP7	F6SYP7	DGCR2	General	-0.058	0.006	-0.117	0.055	0.012	-0.149	-0.061	-0.004	-0.035	0.028	0.071	0.0405	0.970495	0.029	0.664104	0.023	0.06614	0.0798333	2	2	62245.3	3.8
F6TDL0	F6TDL0	LOC110117498-PIK3R3	General	0.084	0.049	0.071	0.071	0.023	0.092	-0.123	-0.167	-0.21	0.044	-0.022	0.0635	0.98803	-0.006	0.0020168	-0.234667	0.00440389	0.195167	11	14	59735.5	29.9
F6WH68	F6WH68	RTEL1-TNFRSF6B	General	0.01	0.071	0.02	0.03	-0.018	-0.015	-0.075	-0.032	-0.004	-0.035	-0.034	-0.0285	0.90427	-0.0346667	0.126547	-0.0706667	0.916776	0.0045	34	31	154578	27.3
F6WQW2	F6WQW2	RANBP1	General	-0.095	0.015	0.012	0.093	0.003	0.096	-0.022	0.125	0.057	0.007	-0.091	-0.0135	0.82075	0.0866667	0.258674	0.076	0.162545	-0.0858333	5	22	32303.1	44.9
F6XZQ7	F6XZQ7	GSTM2	General	0.085	0.003	0.048	-0.224	-0.103	-0.086	0.458	0.598	0.494	0.042	0.004	0.1495	0.489249	-0.183	0.000440252	0.471333	0.000409374	-0.4515	2	4	26439.6	20.9
F8V0	F8V0	KANSL2	General	-0.051	-0.046	0.043	0.029	-0.06	0.021	0.079	0.073	0.166	-0.066	0.039	-0.0645	0.977806	0.0146667	0.0496811	0.124	0.0324662	-0.1365	22	18	76505.4	28
F8VQZ7	F8VQZ7	METAP2	General	0.132	0.053	-0.008	-0.001	-0.087	0.014	0.133	0.038	-0.071	-0.083	-0.173	0.0625	0.834494	-0.0836667	0.75782	-0.0256667	0.286725	-0.0978333	5	40	53675.4	75
F8VRP2	F8VRP2	MAPKAPK5	General	0.091	-0.077	0.052	0.124	-0.028	0.175	-0.027	-0.164	-0.037	-0.095	-0.014	0.1215	0.919689	0.0683333	0.212984	-0.098	0.316761	0.0801667	9	3	8395.4	52.7
F8VTQ9	F8VTQ9	TMTC1	General	0.005	-0.075	-0.022	0.072	-0.018	0.018	0.006	-0.001	0.004	-0.06	-0.025	0.0345	0.881235	0.0546667	0.411732	0.0336667	0.656249	-0.0198333	7	7	107256	6.9
F8VU11	F8VU11	PRPF40B	General	0.002	-0.016	-0.127	0.002	-0.095	-0.221	0.208	0.329	0.87	-0.207	-0.112	-0.2575	0.934234	-0.0576667	0.0413346	0.516	0.00984541	-0.661167	5	7	101692	7.7
F8VUJ3	F8VUJ3	POC1B-GALNT4	General	0.2	-0.014	-0.014	0.027	-0.01	0.099	-0.076	-0.031	-0.012	0.058	0.036	-0.1385	0.985852	-0.0186667	0.249538	-0.097	0.731984	0.0248333	10	6	67035.7	10.6
F8VVA7	F8VVA7	COPZ1	General	-0.019	-0.026	0.035	0.026	-0.007	-0.003	-0.034	-0.01	0.04	-0.065	-0.036	-0.0625	0.985852	0.00866667	0.96662	0.002	0.204928	-0.0531667	22	7	22397.1	38.8
F8VWL3	F8VWL3	FGD4	General	0.04	0.068	0.043	0.113	0.039	0.031	-0.416	-0.431	-0.298	0.027	0.104	0.0815	0.982599	0.0106667	0.000459236	-0.432	0.000194272	0.4525	24	23	102144	27.7
F8VWW7	F8VWW7	SPRYD3	General	-0.03	0.041	0.011	-0.003	-0.111	0.013	-0.003	0.112	0.198	-0.16	-0.069	-0.0365	0.920152	-0.041	0.197788	0.095	0.0266941	-0.190833	10	9	54416.3	24.2
F8VX04	F8VX04	SLC38A1	General	-0.104	-0.031	-0.131	-0.145	0.024	-0.046	0.613	0.52	0.264	0.064	0.135	-0.0015	0.950865	0.033	0.00340047	0.554333	0.0069297	-0.399833	10	6	56936.1	10.3
F8VXC8	F8VXC8	SMARCC2	General	0.04	0.039	0.013	-0.013	-0.036	0.052	-0.098	-0.13	-0.06	-0.076	-0.033	-0.0245	0.926588	-0.0296667	0.0153411	-0.126667	0.229365	0.0515	4	68	136581	49.5
F8VXU5	F8VXU5	VPS29	General	0.076	0.015	0.004	0.057	0.042	-0.01	-0.131	-0.139	-0.195	0.028	0.016	0.0655	0.997735	-0.002	0.00577094	-0.186667	0.00252766	0.1915	35	10	24207.6	53.7
F8VZX2	F8VZX2	PCBP2	General	-0.057	-0.162	-0.173	-0.195	-0.018	0.046	0.098	0.142	-0.265	0.07	-0.007	0.0975	0.907782	0.075	0.390789	0.122333	0.638581	0.0618333	5	27	34141.6	91.2
F8W0Q9	F8W0Q9	PPHLN1	General	-0.063	-0.005	0.095	-0.034	-0.049	0.025	0.189	0.144	0.178	-0.104	-0.067	-0.0435	0.95358	-0.0283333	0.0266119	0.161333	0.000743548	-0.241833	8	31	44796.3	56.3
F8W130	F8W130	TROAP	General	-0.05	-0.137	-0.081	-0.098	0.06	0.078	0.189	0.257	0.218	0.115	-0.094	-0.0095	0.824871	0.102667	0.000903354	0.310667	0.0125732	-0.2175	4	4	95330.1	3.5
F8W6M3	F8W6M3	ZDHHC3	General	-0.073	0.057	0.193	0.165	-0.118	0.026	-0.138	0.022	0.066	-0.214	-0.105	-0.1385	0.977806	-0.0346667	0.478866	-0.0756667	0.0861008	-0.135833	4	2	38891.1	11.4
F8W727	F8W727	RPL32	General	0.039	0.007	0.058	0.074	-0.035	0.076	-0.097	-0.054	-0.01	-0.042	-0.033	0.0275	0.997535	0.00366667	0.0732001	-0.0883333	0.416913	0.0378333	63	13	18133	60.1
F8W7S1	F8W7S1	MIGA1	General	-0.054	0.073	0.008	0.019	0.017	-0.069	0.096	-0.005	0.02	-0.018	0.036	-0.0585	0.972557	-0.02	0.63927	0.028	0.328689	-0.0505	16	12	72102.5	23.3
F8W7U8	F8W7U8	MRE11	General	-0.058	0.087	-0.069	0.219	-0.016	0.289	-0.198	-0.046	-0.009	-0.178	0.004	0.0375	0.815969	0.177333	0.407384	-0.071	0.674	0.0388333	3	50	80863.1	61.9
F8W8D3	F8W8D3	SLBP	General	0.007	0.031	-0.123	-0.139	-0.058	-0.136	0.1	0.239	0.148	0.063	-0.01	-0.0235	0.852667	-0.0826667	0.0300387	0.190667	0.0246967	-0.1525	10	9	32379.3	25.6
F8W8F9	F8W8F9	CASC1	General	0.211	-0.192	-0.302	-0.132	0.108	0.133	-0.177	-0.316	-0.459	0.341	0.099	0.1265	0.924508	0.130667	0.235314	-0.223	0.00244911	0.506167	3	3	84396	7.3
F8W930	F8W930	IGF2BP2	General	0.038	0.055	0.122	0.017	-0.108	-0.027	-0.025	0.023	0.108	-0.188	-0.106	-0.1225	0.75344	-0.111	0.531604	-0.0363333	0.012738	-0.174167	23	23	66899.1	41.4
F8W9P4	F8W9P4	PIK3CD	General	-0.425	0.171	0.366	0.232	-0.295	-0.506	0.251	-0.092	-0.003	-0.633	-0.107	-0.4765	0.935569	-0.227	0.959155	0.0146667	0.0280519	-0.4575	2	2	123658	2
F8WA39	F8WA39	MTMR1	General	0.032	0.035	0.05	0.028	0.018	0.034	-0.121	-0.039	-0.165	0.002	0.033	-0.0015	0.966475	-0.0123333	0.0207148	-0.147333	0.0366885	0.1195	39	25	76458.3	43.5
F8WCF6	F8WCF6	ARPC4-TTLL3	General	-0.01	-0.105	-0.114	-0.046	0.016	-0.005	0.024	0.046	-0.008	0.146	0.106	0.0585	0.851781	0.0646667	0.0787735	0.097	0.0829229	0.0828333	34	16	21172.3	77.3
F8WD26	F8WD26	LMO7	General	-0.028	0.007	0.033	0.01	-0.065	-0.017	0.085	0.088	0.17	-0.132	-0.015	-0.0805	0.937011	-0.028	0.044618	0.110333	0.00776431	-0.190167	225	107	187373	60.6
F8WEC0	F8WEC0	MMADHC	General	0.071	0.057	0.004	0.114	0.068	0.009	-0.252	-0.195	-0.126	0.08	0.037	0.0435	0.966475	0.0196667	0.00480641	-0.235	0.00190292	0.2445	15	12	37117.1	46.3
G0XQ39	G0XQ39	STIM1	Endoplasmic Reticulum	-0.098	0.036	0.053	0.13	0.035	0.009	0.017	-0.05	-0.074	-0.068	0.051	-0.0235	0.902384	0.061	0.622033	-0.0326667	0.690821	0.0221667	42	27	88986.4	38
G3V0I5	G3V0I5	NDUFV1	General	0.093	0.104	0.012	-0.035	-0.07	-0.103	0.304	0.323	0.454	-0.241	-0.244	-0.1835	0.532215	-0.139	0.00449757	0.290667	7.26e-05	-0.583167	63	33	50738	77.2
G3V1A6	G3V1A6	GSDMD	General	0.124	0.055	0.103	0.088	0.054	0.064	-0.272	-0.267	-0.279	0.002	-0.033	0.0175	0.937011	-0.0253333	0.000236761	-0.366667	0.000331088	0.268167	16	13	58304.1	33.8
G3V1L9	G3V1L9	TJP1	General	0	0.05	0.067	0.03	-0.008	0.007	-0.065	-0.043	-0.018	-0.059	-0.001	-0.0055	0.920152	-0.0293333	0.0756187	-0.081	0.629622	0.0201667	149	86	197798	55.8
G3V2J9	G3V2J9	TTLL5	General	0.036	-0.019	-0.035	-0.056	0.063	0.018	-0.083	-0.033	-0.02	-0.022	0.013	-0.0615	0.978387	0.0143333	0.376976	-0.0393333	0.627184	0.0218333	3	3	145197	3.5
G3V2U7	G3V2U7	ACYP1	General	0.122	0.077	0.143	0.05	0.085	-0.003	-0.196	-0.048	-0.203	0.008	-0.144	-0.0475	0.82075	-0.07	0.00612333	-0.263	0.227636	0.0878333	12	8	14182.1	45.7
G3V325	G3V325	ATP5J2-PTCD1	General	-0.058	0.036	-0.153	-0.075	0.047	-0.089	0.229	0.164	0.178	0.071	0.059	-0.0505	0.982686	0.0193333	0.00913177	0.248667	0.0140461	-0.163833	54	35	84736	53.4
G3V3F7	G3V3F7	RPGRIP1	General	0.042	0.037	0.046	0.023	-0.071	0.01	-0.226	-0.184	-0.3	-0.003	0.024	0.0705	0.863756	-0.0543333	0.00156545	-0.278333	0.0013786	0.267167	5	4	143477	2.4
G3V3G9	G3V3G9		General	0.053	-0.01	0.032	0.023	0.006	-0.006	-0.107	-0.07	-0.082	0.05	0.015	0.0655	0.95358	-0.0173333	0.0236858	-0.111333	0.00990076	0.129833	56	31	85606.9	50.9
G3V483	G3V483	G2E3	General	-0.1	-0.004	0.021	0.025	-0.183	-0.023	0.044	0.092	0.07	-0.176	0.002	-0.0205	0.966475	-0.0326667	0.0904349	0.0963333	0.0585455	-0.1335	5	5	85877.3	7.6
G3V4K3	G3V4K3	VIPAS39	General	-0.029	0.067	0.105	0.033	0.065	0.059	-0.125	-0.09	-0.122	0.043	0.02	-0.0275	0.996489	0.00466667	0.0193189	-0.16	0.0150257	0.124167	24	16	59945.6	31
G3V5N8	G3V5N8	ZFYVE1	General	-0.001	-0.036	0.053	0.077	0.015	0.006	-0.001	0.054	0.04	0.022	-0.156	-0.0375	0.942978	0.0273333	0.574552	0.0256667	0.166106	-0.0881667	6	6	90818	7
G3V5T9	G3V5T9	CDK2	General	0.019	0.013	0.04	-0.013	0.05	0.029	-0.097	-0.123	-0.243	0.07	0.044	0.0125	0.997735	-0.002	0.0165059	-0.178333	0.008497	0.1965	66	29	39577.1	66.7
G3XAA4	G3XAA4	JADE2	General	-0.01	-0.018	0.042	-0.008	-0.014	0.042	-0.051	-0.005	0.056	-0.008	-0.018	-0.0405	0.997735	0.002	0.930143	-0.00466667	0.638349	-0.0221667	14	17	93646.8	24.4
G3XAE9	G3XAE9	TOGARAM1	General	0.155	0.243	-0.234	0.012	-0.033	0.006	-0.194	-0.525	-0.53	0.265	0.013	0.0745	0.966475	-0.0596667	0.0378828	-0.471	0.00411734	0.533833	5	4	196686	1.2
G3XAI2	G3XAI2	LAMB1	General	-0.047	-0.059	-0.013	0.002	-0.032	-0.018	0.822	0.8	0.819	-0.096	-0.052	-0.0415	0.937011	0.0236667	1.29e-05	0.853333	2.38e-06	-0.876833	88	61	207835	42
G3XAM1	G3XAM1	ZCCHC10	General	0.049	0.11	0.23	0.126	-0.056	-0.046	-0.05	0.071	0.052	-0.117	-0.087	-0.1415	0.83263	-0.121667	0.173809	-0.105333	0.0230875	-0.1395	3	3	17010.8	16.6
G5E9A6	G5E9A6	USP11	General	-0.029	0.024	-0.04	-0.006	0.018	-0.014	-0.04	0.005	-0.014	0.077	0.068	0.0335	0.967062	0.0143333	0.975973	-0.00133333	0.0719243	0.0758333	52	36	106056	43.5
G5E9E7	G5E9E7	TJP1	General	0.149	0.003	0.086	0.126	-0.056	0.135	-0.021	-0.162	-0.128	-0.007	-0.032	0.2345	0.990374	-0.011	0.030387	-0.183	0.0956286	0.168833	2	86	190072	57.3
G5E9I4	G5E9I4	BRMS1	General	0.004	-0.03	-0.072	-0.086	0.003	-0.023	0.124	0.1	0.153	-0.017	0.012	0.0295	0.997735	-0.00266667	0.00873436	0.158333	0.0161493	-0.1175	16	12	34056.6	37.5
G5E9Z2	G5E9Z2	CLPTM1L	General	-0.244	-0.106	-0.1	-0.065	0.171	-0.073	0.262	0.164	-0.01	0.175	0.151	-0.0365	0.815969	0.161	0.0217709	0.288667	0.692243	-0.0421667	4	16	43393.6	44.9
G5EA30	G5EA30	CELF1	General	0.01	-0.035	-0.074	-0.022	-0.041	-0.015	0.063	0.089	0.137	-0.019	0.038	0.0155	0.988024	0.007	0.0254187	0.129333	0.0700712	-0.0848333	72	26	55598.3	43.9
G8JLB6	G8JLB6	HNRNPH1	General	-0.034	0.026	0.009	-0.008	-0.033	0.028	-0.042	-0.012	0.007	-0.023	0.011	-0.0215	0.99288	-0.00466667	0.699182	-0.016	0.914107	0.0045	246	40	51514.2	76.4
H0UI06	H0UI06	COX7A2	General	0.006	0.129	-0.216	-0.067	0.048	-0.14	0.298	0.185	0.127	-0.115	-0.099	-0.1275	0.985852	-0.026	0.0816635	0.230333	0.00119264	-0.317167	3	2	12957.8	16.5
H0UI80	H0UI80	TH1L	General	-0.034	-0.051	-0.104	-0.094	0.003	-0.021	0.233	0.192	0.058	0.09	0.099	0.0135	0.946923	0.0256667	0.0126451	0.224	0.165115	-0.0935	34	18	67973.3	33.8
H0Y2S1	H0Y2S1	GTPBP6	General	-0.055	0.01	-0.142	-0.029	0.015	-0.064	0.232	0.247	0.237	0.062	0.043	-0.0635	0.940308	0.0363333	0.00214241	0.301	0.00286125	-0.224833	17	12	57238.8	31.2
H0Y3P2	H0Y3P2	EIF4G2	General	0.023	-0.045	-0.001	0.105	-0.081	-0.007	0.081	0.165	0.069	0.003	-0.085	0.0815	0.986309	0.0133333	0.0486767	0.112667	0.115001	-0.105167	5	71	98629.9	73.9
H0Y7B0	H0Y7B0	TEAD4	General	-0.022	-0.18	-0.149	-0.245	0.013	0.034	0.075	-0.265	-0.16	0.033	0.015	-0.0045	0.95358	0.051	0.998134	0.000333333	0.201098	0.131167	2	2	11612.5	17.2
H0YBQ0	H0YBQ0	TXNRD3	General	0.017	0.086	0.026	0.002	-0.035	0.108	-0.191	-0.287	-0.28	0.037	-0.056	0.0805	0.972912	-0.018	0.00155319	-0.295667	0.00235133	0.273167	7	7	71757.8	15.5
H0YKE0	H0YKE0	WDR72	General	0.025	-0.049	0.01	-0.011	-0.007	0.018	0.041	0.013	0	-0.03	0.002	-0.0445	0.992469	0.00466667	0.593543	0.0226667	0.279206	-0.0421667	7	2	126916	1
H0YL70	H0YL70	TLE3	General	0.055	-0.009	0.004	0.041	-0.011	0.016	-0.115	-0.056	-0.071	0.055	0.029	0.0545	0.997839	-0.00133333	0.0477763	-0.0973333	0.0114343	0.126833	58	32	85275.2	48
H0YLI7	H0YLI7	AP3S2	General	0.058	-0.021	-0.027	0.06	0.104	0.134	-0.538	-0.391	-0.555	0.085	0.022	-0.0405	0.74321	0.096	0.000630806	-0.498	0.000259008	0.516833	5	9	23625.9	40
H0YMV8	H0YMV8	RPS27L	General	0.008	-0.018	-0.03	0.014	-0.121	0.068	-0.123	0.022	-0.054	0.004	-0.004	0.0435	0.9987	0.000333333	0.489649	-0.0383333	0.227593	0.0661667	29	9	11858.8	71
H0YNJ6	H0YNJ6	GMPR2	General	0.145	0.041	0.075	0.043	0.024	-0.012	-0.18	-0.212	-0.094	0.05	-0.034	0.0645	0.826544	-0.0686667	0.00507198	-0.249	0.00944768	0.188833	36	21	47507.7	53.8
H3BLT9	H3BLT9	NLRC3	General	0.048	-0.035	0.077	0.006	-0.017	-0.058	0.094	0.008	0.007	-0.084	-0.021	-0.0255	0.886082	-0.053	0.916965	0.00633333	0.113342	-0.0798333	5	3	120856	3.1
H3BM74	H3BM74	NUB1	General	-0.014	-0.068	-0.003	0.036	-0.012	0.004	0.047	0.036	-0.035	0.029	-0.006	0.0255	0.89568	0.0376667	0.348375	0.0443333	0.997488	0.000166667	37	25	74195.9	35.3
H3BMD8	H3BMD8	ARPP19	General	0.101	0.048	0.07	0.142	0.024	0.19	-0.374	-0.298	-0.192	-0.002	-0.08	0.0875	0.920863	0.0456667	0.00190202	-0.361	0.00543446	0.289833	8	13	14484.1	63.3
H3BMF4	H3BMF4	SPNS1	General	-0.081	0.061	-0.03	-0.011	0.036	-0.115	0.1	0.114	-0.054	0.048	0.081	-0.1205	0.9867	-0.0133333	0.367635	0.07	0.555041	-0.0505	8	7	61675.2	13.4
H3BMJ4	H3BMJ4	GOLGA6L2	General	0.035	0.053	-0.01	-0.012	-0.039	0.027	-0.13	0.014	0.074	-0.151	-0.064	-0.0615	0.912783	-0.034	0.585403	-0.04	0.279379	-0.0781667	6	4	101008	3.5
H3BNW8	H3BNW8	TMC7	General	-0.307	0.071	-0.042	0.078	0.057	-0.154	0.314	0.387	0.341	-0.064	-0.097	-0.2025	0.940308	0.0863333	0.00948976	0.44	0.000156866	-0.4685	3	3	88362.5	4.4
H3BP20	H3BP20	HEXA	General	0.069	-0.024	-0.105	-0.029	0	0.001	0.05	-0.003	-0.094	0.07	0.16	0.0855	0.987709	0.0106667	0.956279	0.00433333	0.0603107	0.120833	33	21	62454.6	43.1
H3BQ19	H3BQ19	DOK4	General	-0.055	0.019	-0.024	0.002	0.023	0.034	-0.049	-0.038	-0.098	0.103	0.009	0.0485	0.886515	0.0396667	0.34587	-0.0416667	0.0319793	0.115167	4	4	41938.8	9
H3BQK9	H3BQK9	MACF1	General	-0.015	0.01	0.005	-0.003	-0.006	-0.016	0.021	0.001	0.007	-0.028	0.013	-0.0225	0.982579	-0.00833333	0.786078	0.00966667	0.556289	-0.0221667	349	259	866540	36.6
H3BS01	H3BS01	C15orf41	General	0.067	-0.009	0.011	0.084	0.047	-0.024	-0.093	0.103	-0.009	-0.022	-0.081	-0.0415	0.982599	0.0126667	0.757262	-0.0226667	0.459182	-0.0485	3	3	33490.8	12.5
H3BST1	H3BST1	BLOC1S6	General	0.063	-0.007	0.144	-0.01	-0.094	-0.088	0.085	0.06	-0.032	-0.087	-0.102	-0.0245	0.71177	-0.130667	0.668804	-0.029	0.0611442	-0.108833	2	2	20379.1	17.5
H3BSW6	H3BSW6	CTU2	General	0.099	-0.018	-0.039	-0.105	-0.011	-0.1	0.357	0.342	0.275	-0.053	-0.067	-0.0295	0.83313	-0.086	0.0025499	0.310667	0.000136502	-0.3745	21	15	64878.8	28.8
H3BU86	H3BU86	ST6-NPEPL1	General	-0.178	0.083	0.045	-0.019	0.033	-0.043	-0.02	-0.005	-0.034	-0.027	0.045	-0.0975	0.997353	0.007	0.975531	-0.003	0.903259	-0.00683333	12	9	43684.8	28.2
H3BUF6	H3BUF6	ATXN2L	General	0.027	-0.018	-0.059	-0.038	0	0.091	-0.126	-0.297	-0.174	0.107	0.021	0.0945	0.940308	0.0343333	0.0263691	-0.182333	0.00344358	0.273167	16	55	112997	50.6
H7BXH9	H7BXH9	METTL21A	General	0.023	-0.106	0.028	0.046	0.053	0.053	-0.142	-0.097	-0.277	0.022	-0.069	0.0855	0.86309	0.069	0.0769652	-0.153667	0.0316752	0.184833	5	4	26787.4	17.3
H7BY22	H7BY22	ZBTB44	General	-0.067	0.075	0.039	-0.013	0.008	-0.042	-0.078	0.03	0.017	-0.147	-0.101	-0.1355	0.944641	-0.0313333	0.695744	-0.026	0.0357721	-0.1175	3	3	64850.4	5.4
H7BY58	H7BY58	PCMT1	General	0.022	-0.015	0.021	0.029	0.015	-0.034	-0.063	-0.02	-0.045	0.002	-0.051	0.0375	0.98803	-0.006	0.180432	-0.052	0.374996	0.0388333	51	15	30585.6	53.1
H7BYY1	H7BYY1	TPM1	General	-0.046	-0.008	0.009	0.118	-0.068	-0.024	-0.019	0.019	0.068	0.021	-0.032	-0.0575	0.972557	0.0236667	0.405421	0.0376667	0.335504	-0.0455	15	38	28746.6	81
H7BZ51	H7BZ51	GTF3A	General	0.126	-0.06	-0.102	-0.039	0.029	0.125	-0.145	-0.275	-0.443	0.097	-0.006	0.2065	0.944801	0.0503333	0.0456165	-0.275667	0.00653	0.386833	4	2	10874.3	15.3
H7BZ55	H7BZ55	CROCC2	General	0.109	-0.076	-0.06	0.116	0.003	0.095	-0.374	-0.27	-0.226	0.14	0.093	0.0565	0.886083	0.0803333	0.011798	-0.281	0.000462105	0.3865	8	7	187010	3.2
H7C2Q8	H7C2Q8	EBNA1BP2	General	-0.029	0.013	0.035	-0.024	-0.11	-0.059	0.31	0.22	0.299	-0.171	0.024	-0.0775	0.815969	-0.0706667	0.00176787	0.27	0.00149208	-0.351167	73	28	40854.9	48.7
H8Y6P7	H8Y6P7	GCOM1	General	-0.017	0.019	0.04	0.033	-0.054	0.043	-0.036	0.034	-0.023	-0.017	-0.067	0.0255	0.989839	-0.00666667	0.608954	-0.0223333	0.823987	-0.0111667	18	15	88318.6	20.2
I3L0A0	I3L0A0	TMEM189-UBE2V1	General	0.055	-0.034	-0.029	-0.008	0.006	0.01	-0.054	-0.007	-0.016	0.106	-0.03	0.0315	0.991219	0.00533333	0.62664	-0.023	0.245012	0.0615	47	18	42778.4	44.3
I3L0E3	I3L0E3	hCG_1984214	General	0.028	0.023	-0.023	-0.044	-0.012	-0.064	0.256	0.194	0.23	-0.05	-0.032	0.0095	0.855077	-0.0493333	0.002285	0.217333	0.000742485	-0.250833	15	8	25891.2	40.8
I3L0N3	I3L0N3	NSF	General	0.025	0.032	0.037	0.055	-0.007	0.038	-0.07	-0.097	-0.076	-0.043	0.031	0.0355	0.997467	-0.00266667	0.0133661	-0.112333	0.0592471	0.0888333	117	57	82603.8	69.9
I3L0N4	I3L0N4	FAM57A	General	-0.161	0.057	-0.117	0.035	-0.036	0.008	0.059	-0.016	0.268	-0.127	-0.059	-0.2255	0.889251	0.076	0.144391	0.177333	0.0328015	-0.240833	4	4	16753	32.2
I3L156	I3L156	PIMREG	General	-0.055	-0.037	0.006	-0.029	-0.047	0.022	0.321	0.244	0.26	-0.207	-0.098	-0.1525	0.982599	0.0106667	0.000847063	0.303667	0.0001497	-0.4275	7	6	31242.5	27.9
I3L2B2	I3L2B2	EPN2	General	0.019	-0.048	-0.01	-0.036	-0.008	-0.063	0.048	0.15	0.112	-0.037	-0.068	-0.0375	0.944641	-0.0226667	0.042715	0.116333	0.0103408	-0.150833	21	15	61607.8	30.8
I3L2J0	I3L2J0	CIC	General	-0.038	0.034	0.04	0.008	-0.036	0.033	0.027	0.01	0.065	-0.048	-0.061	-0.0435	0.985852	-0.0103333	0.629106	0.022	0.0473972	-0.0848333	29	25	259057	12.8
I3L301	I3L301	TFAP4	General	0.031	0.024	0.144	0.197	-0.077	-0.09	-0.046	0.268	0.218	-0.055	-0.133	-0.2095	0.948255	-0.0563333	0.477032	0.0803333	0.025631	-0.279167	5	5	18083.7	29.3
I3L3Z2	I3L3Z2	NAA38	General	0.024	0.091	-0.026	-0.058	-0.014	-0.009	0.085	-0.023	-0.003	-0.042	-0.033	-0.0535	0.881235	-0.0566667	0.872632	-0.01	0.191657	-0.0625	12	9	14815.4	78.5
I3L448	I3L448	ATPAF1	General	-0.029	-0.049	-0.207	-0.042	0.066	-0.004	0.027	0	0.028	0.118	0.09	0.0545	0.83313	0.101667	0.114137	0.113333	0.100402	0.0691667	33	18	39202.7	45
I3L4C3	I3L4C3	SPAG7	General	0.055	0.024	0.135	0.119	-0.022	-0.01	-0.001	-0.028	-0.102	-0.057	-0.006	0.0655	0.937011	-0.0423333	0.0683543	-0.115	0.424235	0.0445	3	18	22265.7	60.8
I3L4J6	I3L4J6	ZNF232	General	-0.062	0.175	-0.049	0.105	-0.094	0.005	-0.086	-0.043	0.102	0.006	-0.123	-0.0185	0.98803	-0.016	0.778429	-0.0303333	0.630059	-0.0361667	3	6	50377.6	11.4
I3L4Q0	I3L4Q0	MCRIP1	General	-0.024	-0.016	0.009	0	-0.032	-0.023	0.038	0.094	0.106	0.018	-0.029	0.0365	0.985852	-0.008	0.0531618	0.0896667	0.12323	-0.0708333	4	4	12950.3	35.5
I3NI02	I3NI02	GOSR2	General	-0.128	-0.023	0.04	0.001	-0.041	-0.049	0.048	0.087	0.111	-0.028	0.08	-0.0275	0.991698	0.00733333	0.0848747	0.119	0.162089	-0.0738333	16	10	29869.3	50.9
I3NI25	I3NI25	FOPNL	General	0.041	0.014	-0.094	-0.124	0.008	-0.03	-0.075	0.025	-0.135	0.115	0.089	0.0195	0.944818	-0.0356667	0.499902	-0.0486667	0.048366	0.136167	4	4	22184.9	22.2
I6L8A6	I6L8A6	RBBP8	General	0.046	0.05	-0.038	0.017	-0.025	0.091	0.002	-0.017	0.008	-0.121	-0.096	0.0265	0.988164	0.00833333	0.633498	-0.0216667	0.272818	-0.0611667	3	3	103921	4.9
J3KN01	J3KN01	AFDN	General	-0.033	-0.019	0.004	0.049	-0.005	0.018	-0.02	0.002	-0.003	-0.023	-0.009	-0.0075	0.886515	0.0366667	0.806244	0.009	0.8708	-0.00616667	85	66	208641	37.8
J3KNA0	J3KNA0	OXA1L	General	-0.181	0.046	-0.234	0.003	0.146	-0.078	0.254	0.095	0.059	0.059	-0.041	-0.0865	0.855793	0.146667	0.0467143	0.259	0.06087	-0.158833	23	12	55839.4	21.6
J3KNF5	J3KNF5	CEP290	General	-0.005	0.002	0.019	-0.003	-0.018	0.042	-0.006	-0.025	0.023	-0.051	-0.064	-0.0325	0.997735	0.00166667	0.834511	-0.008	0.228427	-0.0465	80	71	291224	26.5
J3KNF8	J3KNF8	CYB5B	General	-0.097	-0.197	-0.403	-0.302	0.006	-0.322	0.221	0.183	0.092	0.126	0.151	0.0995	0.9867	0.0263333	0.00817195	0.397667	0.44151	-0.0398333	15	7	16808.4	54.6
J3KNH0	J3KNH0	C12orf66	General	0.068	0.041	0.12	0.059	-0.056	0.02	-0.024	-0.053	-0.018	-0.153	-0.111	-0.0355	0.851781	-0.0686667	0.0327533	-0.108	0.170137	-0.0681667	4	2	53468.4	3.4
J3KNJ7	J3KNJ7	METTL4	General	-0.04	-0.015	-0.079	-0.045	0.044	-0.004	-0.134	-0.257	-0.08	0.135	0.114	0.0485	0.891276	0.043	0.111161	-0.112333	0.00480731	0.256167	3	3	48706.2	7.1
J3KNL6	J3KNL6	SEC16A	General	-0.039	0.068	0.19	0.112	-0.078	-0.003	-0.085	-0.136	-0.007	-0.076	0.025	-0.1295	0.937011	-0.0626667	0.102607	-0.149	0.818254	0.0158333	6	81	253486	44.1
J3KNN3	J3KNN3	PHKG2	General	-0.027	-0.008	0.006	0.042	0.03	0.05	0.005	-0.091	-0.047	0.028	0.025	-0.0465	0.82075	0.0503333	0.43873	-0.0346667	0.342295	0.0465	20	18	47285.3	51.4
J3KNP4	J3KNP4	SEMA4B	General	-0.051	0.081	-0.048	0.023	-0.045	-0.103	0.056	0.168	0.318	0.001	-0.038	-0.1755	0.944801	-0.0356667	0.0771152	0.186667	0.0235995	-0.2515	10	7	94133.5	8.2
J3KNW5	J3KNW5	CLUAP1	General	-0.034	0.202	-0.126	-0.027	0.064	-0.072	-0.002	-0.203	-0.316	0.002	0.053	-0.0325	0.985852	-0.0256667	0.198975	-0.187667	0.0782622	0.181167	2	2	50255.7	4.8
J3KNW7	J3KNW7	CEP83	General	0.001	0.052	0.023	0.039	0.01	-0.017	-0.033	0.045	0.127	-0.089	-0.101	-0.0825	0.966475	-0.0146667	0.733452	0.021	0.0327829	-0.137167	20	15	83109.7	23.1
J3KNX4	J3KNX4	MUM1	General	0.018	-0.141	-0.036	-0.031	-0.083	0.085	0.121	0.095	0.155	-0.142	-0.005	-0.0405	0.943581	0.0433333	0.0209854	0.176667	0.00890169	-0.186167	10	8	79850	12.9
J3KNZ9	J3KNZ9	FBRS	General	0.008	0.02	-0.011	0.024	-0.025	0.001	-0.02	0.073	0.069	-0.033	-0.041	-0.0585	0.98803	-0.00566667	0.451184	0.035	0.0820238	-0.0848333	11	9	104110	8.4
J3KP02	J3KP02	LEKR1	General	0.081	-0.047	-0.241	-0.101	0.051	-0.02	0.236	-0.097	-0.038	0.182	0.141	-0.0295	0.965012	0.0456667	0.484554	0.102667	0.594651	0.0641667	4	3	81740.9	5
J3KPC8	J3KPC8	SIK3	General	0.012	0.042	0.006	0.025	0.005	0.026	-0.139	-0.073	-0.084	0.1	-0.006	0.0405	0.997735	-0.00133333	0.0206316	-0.118667	0.016763	0.1435	21	20	146104	16.1
J3KPD3	J3KPD3	RBM7	General	0.008	0.017	0.071	0.02	-0.069	-0.07	0.176	0.163	0.176	-0.112	-0.08	-0.0815	0.82075	-0.0716667	0.00969103	0.139667	0.00031035	-0.262833	22	14	30590.1	52.8
J3KPF0	J3KPF0	HECTD4	General	0.013	0.057	0.007	0.052	0.074	0.023	-0.194	-0.149	-0.148	0.05	0.004	-0.0145	0.940308	0.024	0.00342089	-0.189333	0.00349739	0.176833	39	36	490564	10.1
J3KPH8	J3KPH8	HDAC7	General	0.034	-0.026	0.059	-0.001	-0.083	-0.066	0.226	0.31	0.24	-0.073	-0.072	-0.0535	0.82075	-0.0723333	0.00342089	0.236333	0.000249884	-0.324833	27	22	109992	24.9
J3KPJ3	J3KPJ3	CAMKK1	General	0.03	0.011	0.036	-0.017	-0.004	-0.033	0.037	0.091	0.009	-0.02	-0.086	-0.0495	0.851781	-0.0436667	0.637667	0.02	0.0516486	-0.0975	30	19	59428.6	37.4
J3KPT4	J3KPT4	TRABD	General	-0.126	0.002	-0.051	-0.028	0.032	0.01	-0.02	-0.051	-0.035	0.067	0.079	0.0575	0.873539	0.063	0.659012	0.023	0.0189306	0.103167	18	13	43034.1	44.5
J3KPZ4	J3KPZ4	C1D	General	0.093	-0.087	-0.092	-0.074	-0.05	-0.044	0.232	0.107	0.023	0.05	0.218	0.1315	0.966475	-0.0273333	0.132883	0.149333	0.884665	0.0125	9	5	20172.6	21.1
J3KQ26	J3KQ26	ARMC5	General	-0.04	-0.029	-0.083	-0.029	-0.079	-0.004	0.081	0.144	0.145	0.069	-0.015	-0.0705	0.972912	0.0133333	0.00620255	0.174	0.0395988	-0.128833	19	16	109549	18.9
J3KQ32	J3KQ32	OLA1	General	0.035	-0.037	0.014	-0.005	0.014	-0.038	0.036	0.049	-0.017	0.005	-0.091	0.0145	0.972569	-0.0136667	0.682102	0.0186667	0.357648	-0.0465	80	36	47165.4	82.2
J3KQ40	J3KQ40	TBC1D8	General	-0.069	0.068	-0.124	-0.067	0.062	-0.082	0.271	0.334	0.023	0.106	-0.007	-0.0465	0.98803	0.0126667	0.0604131	0.251	0.0860075	-0.191833	4	4	133850	3.2
J3KQ42	J3KQ42	TSPAN4	General	-0.156	0.147	0.006	0.093	0.054	0.088	-0.035	-0.034	0.022	-0.047	-0.222	-0.0735	0.911368	0.0793333	0.88889	-0.0146667	0.139137	-0.0985	3	2	28828.2	12.4
J3KQ48	J3KQ48	PTRH2	General	0.009	0.02	-0.011	0.069	0.031	-0.053	0.08	-0.053	-0.059	-0.07	0.052	0.0245	0.9867	0.00966667	0.781356	-0.0166667	0.851999	0.0128333	30	11	19609.7	67.2
J3KQA9	J3KQA9	MTUS2	General	0.179	0.051	-0.062	-0.017	0.01	0.105	-0.078	-0.253	-0.269	0.09	0.132	0.0865	0.979828	-0.0233333	0.0338603	-0.256	0.00289583	0.302833	7	6	151965	2.9
J3KQJ1	J3KQJ1	SUMF2	General	0.006	0.042	0.027	0.016	-0.058	0.018	0.005	-0.029	-0.036	-0.097	0.018	-0.0765	0.916764	-0.033	0.233961	-0.045	0.523191	-0.0318333	30	14	36093	43.4
J3KQL8	J3KQL8	APOL2	General	-0.08	-0.015	0.019	-0.008	-0.074	-0.023	0.138	0.145	0.219	-0.063	-0.013	-0.0345	0.985852	-0.00966667	0.00848597	0.192667	0.00248091	-0.204167	29	16	49085.6	31.4
J3KQN4	J3KQN4	RPL36A	Endoplasmic Reticulum	0.149	-0.026	0.029	0.079	-0.014	0.092	-0.104	-0.1	-0.161	0.004	0.007	0.0425	0.99832	0.00166667	0.0302503	-0.172333	0.0092189	0.1395	29	11	16663.2	40.8
J3KQR4	J3KQR4	ZNF418	General	-0.025	0.063	-0.075	-0.091	0.057	0.029	0.081	-0.155	-0.24	0.086	0.178	0.0475	0.98803	0.0106667	0.411418	-0.0923333	0.0636817	0.2085	3	10	82903.6	12.6
J3KQR7	J3KQR7	CEP170B	General	-0.025	0.021	0.067	-0.018	-0.016	0.022	0.013	0.001	0.035	-0.036	-0.073	-0.0715	0.943258	-0.025	0.921486	-0.00466667	0.0636817	-0.0765	27	28	172327	21.1
J3KQV8	J3KQV8	SYNJ1	General	0.04	0.031	0.049	0.049	0.088	-0.005	-0.15	-0.152	-0.216	0.067	0.016	0.0375	0.996126	0.004	0.00221542	-0.212667	0.00167341	0.212833	27	22	178858	17.6
J3KQY1	J3KQY1	MRPL22	General	-0.023	-0.006	-0.186	-0.073	0.005	-0.081	0.23	0.194	0.176	0.061	0.013	0.0045	0.97357	0.022	0.00709119	0.271667	0.00360837	-0.173833	32	14	26702.7	49.5
J3KR25	J3KR25	TRIB3	General	1.572	-0.05	-0.232	-0.142	-0.236	0.557	-0.143	-0.005	0.174	-0.913	0.175	-0.1675	0.943258	-0.370333	0.481624	-0.421333	0.323269	-0.3105	2	2	43270	4.9
J3KR33	J3KR33	MED19	General	-0.025	-0.017	0.012	0.064	-0.098	-0.029	0.133	0.147	0.153	-0.127	-0.064	-0.0555	0.9867	-0.011	0.00475896	0.154333	0.0010657	-0.2265	7	5	28141.6	31.4
J3KR44	J3KR44	OTUB1	General	0.074	-0.074	-0.025	0.025	0.002	-0.047	-0.08	-0.019	-0.123	0.082	0.031	0.0835	0.99832	0.00166667	0.306024	-0.0656667	0.0167751	0.1395	26	14	31667.9	60.6
J3KR72	J3KR72	TAF6	General	-0.07	0.017	-0.018	-0.005	-0.03	-0.051	0.097	0.126	0.21	-0.084	-0.031	-0.0765	0.992469	-0.005	0.0170033	0.168	0.00365336	-0.208167	36	27	79746	43.7
J3KR97	J3KR97	TBCD	General	0.015	-0.013	-0.001	0.024	0.065	0.015	-0.08	-0.046	-0.224	0.031	-0.001	-0.0235	0.891276	0.0343333	0.098534	-0.117	0.081429	0.118833	100	58	138432	54.2
J3KS32	J3KS32	TGIF1	General	0.042	0.037	-0.043	0.082	-0.023	-0.103	-0.031	0.062	0.194	-0.065	-0.134	-0.0855	0.966475	-0.0266667	0.43194	0.063	0.0398516	-0.169833	3	3	9356.3	35.7
J3KTA1	J3KTA1	FBXL20	General	0.019	-0.007	-0.028	-0.003	0.077	-0.022	0.019	-0.06	-0.07	-0.008	-0.021	0.0235	0.950865	0.0226667	0.49182	-0.0316667	0.437318	0.0351667	12	11	50400.3	28.7
J3KTH2	J3KTH2	TAF4B	General	0.013	-0.106	-0.268	-0.297	0.107	0.024	0.104	-0.118	-0.09	0.008	-0.039	0.0495	0.961851	0.065	0.458066	0.0856667	0.605857	0.0408333	2	3	92510.3	4.2
J3KTL2	J3KTL2	SRSF1	General	-0.016	-0.027	0.012	-0.004	-0.038	0.048	-0.008	-0.026	0.068	-0.039	-0.003	-0.0255	0.97658	0.0123333	0.640711	0.0216667	0.452728	-0.0338333	128	38	28442.8	73.9
J3QK89	J3QK89	CHERP	General	-0.003	0.008	0.009	0	-0.057	-0.046	0.089	0.058	0.113	-0.103	-0.016	-0.0385	0.886082	-0.039	0.0522435	0.082	0.0135593	-0.139167	65	31	105388	34.7
J3QL71	J3QL71	SCRN2	General	0.013	-0.015	0.069	0.006	0.02	-0.017	-0.022	-0.003	-0.008	0.018	-0.074	-0.0255	0.95358	-0.0193333	0.428542	-0.0333333	0.717158	-0.0161667	19	13	47949.2	37.8
J3QLM1	J3QLM1	STARD3	General	-0.018	0.064	-0.105	-0.027	0.019	0.022	-0.032	-0.035	-0.018	0.074	0.087	-0.0245	0.966475	0.0243333	0.8931	-0.00866667	0.139543	0.0738333	7	7	53053.7	18.9
J3QLS3	J3QLS3	MRPS7	General	-0.007	0.057	-0.034	-0.022	0.027	-0.093	0.131	0.038	0.129	-0.085	-0.056	-0.0125	0.940308	-0.0346667	0.101887	0.094	0.0141437	-0.1505	37	18	31931.7	53.5
J3QQS0	J3QQS0	WIPF2	General	0.129	-0.046	-0.268	0.024	-0.048	0.225	0.003	-0.356	-0.128	0.219	0.122	0.2105	0.903623	0.128667	0.545673	-0.0986667	0.0119811	0.344167	2	2	8789	29.1
J3QR07	J3QR07	YTHDC1	General	-0.016	0.003	-0.011	-0.016	-0.098	0.087	-0.053	-0.03	0.058	-0.048	0.018	0.0105	0.998591	-0.001	0.9953	-0.000333333	0.972803	0.00183333	79	48	85871.1	45
J3QR46	J3QR46	KIAA0040	General	-0.06	-0.039	-0.096	-0.022	0.12	-0.167	0.124	-0.06	0.041	0.003	0.073	0.1035	0.955362	0.042	0.148549	0.1	0.719438	0.0248333	3	3	11719.8	26.2
J3QRL7	J3QRL7	NAT9	General	0.017	0	-0.059	-0.057	-0.049	-0.077	0.042	0.163	0.144	0.043	-0.059	0.0095	0.880682	-0.047	0.045062	0.130333	0.0582262	-0.1185	7	5	24061.8	30.3
J3QRS3	J3QRS3	MYL12A	General	-0.022	-0.003	0.01	-0.013	0.025	0.001	-0.033	0.001	-0.012	-0.036	0.034	-0.0465	0.979052	0.00933333	0.794293	-0.00966667	0.973779	-0.0015	69	19	20513.6	64.4
J3QRU1	J3QRU1	YES1	General	-0.027	-0.027	-0.185	-0.139	0.061	-0.215	0.242	0.189	0.024	0.07	0.044	0.0645	0.988024	-0.018	0.0356442	0.231333	0.20196	-0.0921667	29	26	61899.4	50.7
J3QS41	J3QS41	HELZ	General	0.023	-0.003	0.01	-0.009	0.006	0.039	-0.079	-0.041	-0.064	0.053	0.023	0.0525	0.997735	0.002	0.0713709	-0.0713333	0.0207156	0.104167	55	46	220822	28.3
J3QSW6	J3QSW6	KALRN	General	-0.096	0.055	0.282	0.335	0.254	0.021	-0.279	-0.036	-0.318	0.095	0.021	-0.0105	0.91589	0.123	0.0756748	-0.291333	0.0263826	0.246167	2	16	343393	5.5
J3QT77	J3QT77	PON2	General	-0.05	0.024	0.025	0.128	0.124	0.127	-0.239	-0.35	-0.374	0.062	0.196	0.0995	0.466059	0.126667	0.0021286	-0.320667	0.000393014	0.440167	39	16	38150.8	74.8
J3QTA6	J3QTA6	CHCHD6	General	-0.072	0.044	0.011	0.024	-0.067	-0.007	-0.015	-0.023	0.079	-0.192	-0.069	-0.0655	0.986194	-0.011	0.750663	0.0193333	0.0638619	-0.1225	23	15	29102.3	53.1
J9JIE6	J9JIE6	TMCO1	General	-0.193	-0.105	-0.096	0.029	0.117	0.023	0.168	-0.016	-0.104	0.061	0.198	0.0745	0.390375	0.187667	0.13744	0.147333	0.30301	0.0951667	12	7	27477.9	26.3
K4DI93	K4DI93	CUL4B	General	0.026	-0.011	-0.045	-0.03	-0.012	0.006	0.05	0.008	-0.042	0.036	0.065	0.0315	0.997735	-0.002	0.755702	0.0153333	0.375033	0.0388333	95	67	103381	66.2
K7ELL7	K7ELL7	PRKCSH	Endoplasmic Reticulum	-0.051	0.016	0.015	0.024	0.006	0.019	0.071	0.016	0.005	-0.073	0.028	-0.0415	0.941463	0.023	0.410471	0.0373333	0.226061	-0.0595	93	34	61161.1	71.7
K7EM18	K7EM18	EIF1	General	0.031	-0.054	0.032	0.07	0.004	0.101	-0.199	-0.13	-0.116	0.038	0.005	0.0595	0.886082	0.0553333	0.0199633	-0.151333	0.00418084	0.1825	8	10	13778.5	71.9
K7EMK7	K7EMK7	TLE2	General	0.152	0.032	-0.004	-0.028	0.003	0.086	-0.164	-0.102	-0.144	0.026	0.07	0.0305	0.941618	-0.0396667	0.0148984	-0.196667	0.00308053	0.178833	14	19	81165.8	32.3
K7EP90	K7EP90	RBM42	General	-0.039	-0.001	0.001	0	-0.032	-0.031	0.166	0.09	0.067	-0.043	-0.033	-0.0715	0.985852	-0.008	0.0325865	0.120667	0.00906267	-0.156833	31	17	48137.4	41.7
K7EQ44	K7EQ44	ELOF1	General	-0.002	-0.092	0.002	-0.041	-0.012	-0.091	0.112	0.131	0.07	-0.061	0.03	0.0665	0.972557	-0.0173333	0.025848	0.135	0.0965099	-0.0925	6	3	13171.1	21.9
K7ERG9	K7ERG9	CFD	General	0.275	0.205	0.177	0.306	0.073	0.16	-0.589	-0.607	-0.427	-0.004	-0.093	-0.1195	0.952379	-0.0393333	0.000164236	-0.76	0.000488375	0.468833	7	5	28375.8	25
K7ERV3	K7ERV3	TK1	General	-0.023	-0.2	-0.158	-0.126	-0.003	0.251	-0.039	-0.193	0.077	0.095	-0.063	0.1075	0.852916	0.167667	0.464666	0.0753333	0.306764	0.0981667	3	21	29392.6	64.4
L0R6Q1	L0R6Q1	SLC35A4	General	-0.1	0.077	-0.003	0.017	0.263	-0.031	0.201	-0.017	-0.155	0.043	-0.047	0.0535	0.912563	0.0916667	0.8899	0.0183333	0.951618	0.00683333	4	3	11189.6	23.3
L0R819	L0R819	ASDURF	General	-0.077	-0.036	0.074	0.032	-0.017	-0.018	-0.013	0.008	-0.001	-0.034	-0.044	-0.0525	0.985852	0.012	0.855365	0.011	0.248178	-0.0415	11	7	11249.6	77
L0R8F8	L0R8F8	MIEF1	Mitochondria	0.123	0.06	-0.115	-0.067	0.088	-0.042	-0.191	-0.336	-0.004	0.029	0.085	0.1695	0.972912	-0.0296667	0.136174	-0.199667	0.0261505	0.2715	8	5	8444.6	51.4
M0QXA7	M0QXA7	WIZ	General	-0.037	-0.001	0.013	-0.003	-0.079	0.005	0.013	0.031	0.151	-0.131	-0.045	-0.0275	0.966475	-0.0173333	0.214059	0.0733333	0.0508886	-0.132833	60	42	104190	53.4
M0QY76	M0QY76	ZFP36	General	-0.04	-0.005	0.044	0.039	-0.09	-0.008	0.143	0.209	0.237	-0.178	0.001	-0.0145	0.972557	-0.0193333	0.00709119	0.196667	0.00589644	-0.260167	4	4	35309.8	12.6
M0QY77	M0QY77	KXD1	General	-0.017	0.029	-0.011	-0.029	-0.03	-0.012	-0.004	-0.024	0.165	-0.106	0.047	-0.0575	0.933873	-0.024	0.525611	0.0453333	0.282712	-0.0845	9	8	22092.4	36.9
M0QYZ2	M0QYZ2	AP2S1	General	-0.027	-0.018	-0.057	-0.036	0.049	0	0.018	-0.003	-0.104	0.06	0.092	0.0105	0.900478	0.0383333	0.938737	0.00433333	0.136942	0.0838333	16	6	19156.9	38.6
M0QZ12	M0QZ12	GRAMD1A	General	-0.074	0.01	0.072	0.013	-0.025	-0.026	0.126	0.094	0.099	-0.165	-0.048	-0.0945	0.977806	-0.0153333	0.0872398	0.103667	0.00315518	-0.208833	20	17	90418.2	26.2
M0QZD8	M0QZD8	LOC400499	General	-0.203	0.189	-0.22	-0.039	0.235	-0.27	0.168	-0.009	-0.042	0.029	0.17	0.0055	0.982579	0.0533333	0.456027	0.117	0.74058	0.0291667	4	4	357753	2.7
M0QZI3	M0QZI3	FCHO1	General	0.023	-0.036	0.032	0.118	0.033	0.053	-0.059	-0.184	-0.23	-0.028	-0.032	-0.0915	0.849489	0.0616667	0.0358414	-0.164	0.103087	0.107167	5	4	98195.7	2.2
M0R022	M0R022	PET100	General	0.11	0.09	-0.052	-0.031	-0.05	-0.064	0.15	-0.045	-0.014	0.082	-0.032	0.0015	0.815969	-0.0976667	0.835993	-0.019	0.866642	-0.0131667	2	2	8356.6	19.1
M0R226	M0R226	MRPL34	General	-0.088	0.012	0.013	0.065	0.052	-0.076	0.019	-0.032	-0.032	0.01	0.039	-0.1645	0.947382	0.0346667	0.913828	0.006	0.748406	-0.0235	9	5	19859.3	14.1
M0R247	M0R247	HNRNPUL1	General	0.021	-0.183	-0.111	-0.016	0.127	-0.013	-0.069	-0.07	-0.045	0.038	-0.007	-0.0355	0.82075	0.123667	0.678563	0.0296667	0.155631	0.0598333	2	7	12070.2	65.7
M0R2A0	M0R2A0	EMC10	General	0.628	0.483	0.541	-0.054	-0.241	0.036	-0.08	-0.201	-0.319	-0.156	0.084	-0.0015	0.114403	-0.637	0.000362391	-0.750667	0.0936665	0.1755	8	7	39602	19.6
M0R2B7	M0R2B7	POLD1	General	0.047	0.043	0.029	0.033	0.01	0.031	-0.091	-0.043	-0.088	0.014	0.037	-0.0285	0.95358	-0.015	0.0171834	-0.113667	0.0716253	0.0815	127	80	127926	71.6
M0R2Z9	M0R2Z9	SUGP2	General	-0.016	-0.044	-0.027	0.008	-0.073	-0.01	0.109	0.05	0.133	-0.071	0.044	-0.0445	0.996126	0.004	0.0191121	0.126333	0.0423728	-0.121167	102	64	122455	58.3
M0R333	M0R333	DMPK	General	0.157	0.104	-0.126	0.033	-0.017	0.172	-0.676	-0.478	-0.568	0.261	0.095	0.1125	0.98803	0.0176667	0.00188759	-0.619	0.00010816	0.730167	4	4	71318.5	5
O00115	O00115	DNASE2	General	0.053	0.071	-0.009	0.133	-0.009	0.088	-0.269	-0.349	-0.212	0.011	0.122	0.0725	0.944801	0.0323333	0.00204772	-0.315	0.000810567	0.345167	20	12	40093.6	26.1
O00116	O00116	AGPS	General	-0.006	0.061	0.044	0.027	0.009	0.038	-0.081	-0.093	-0.063	-0.026	0.065	0.0255	0.985852	-0.00833333	0.023705	-0.112	0.0408094	0.1005	84	39	73709.2	68
O00139	O00139-2	KIF2A	General	-0.033	0.044	0.009	0.106	-0.257	0.011	0.042	0.041	0.146	-0.141	-0.096	-0.0815	0.956102	-0.0533333	0.207834	0.0696667	0.0071259	-0.1825	3	40	75726.3	51.6
O00141	O00141-2	SGK1	General	-0.016	-0.042	-0.016	0.064	0.07	0.046	-0.098	-0.095	-0.144	0.124	0.079	0.0325	0.628784	0.0846667	0.0455264	-0.0876667	0.00357035	0.190833	24	19	60530.1	34
O00142	O00142	TK2	Mitochondria	-0.05	0.043	-0.243	-0.094	0.01	-0.027	0.194	0.168	0.156	-0.013	-0.085	-0.0485	0.952379	0.0463333	0.0258784	0.256	0.00119766	-0.2215	10	7	31346.6	33.2
O00148	O00148	DDX39A	General	0.044	-0.049	-0.008	-0.027	-0.027	-0.006	0.068	0.095	-0.003	-0.003	0.062	0.0295	0.967397	-0.0156667	0.277449	0.0576667	0.623784	-0.0238333	58	36	49642.1	66.9
O00151	O00151	PDLIM1	General	0.078	0.06	0.124	0.087	0.023	0.05	-0.135	-0.099	-0.108	-0.106	-0.095	0.0125	0.912563	-0.034	0.00266149	-0.201333	0.312616	0.0511667	68	24	36527.5	88.1
O00154	O00154-4	ACOT7	Mitochondria	0.057	-0.062	-0.027	-0.009	-0.018	-0.075	0.123	0.226	0.144	-0.012	-0.091	-0.0005	0.957598	-0.0233333	0.0191074	0.175	0.00591215	-0.198833	54	23	37818.4	67.7
O00159	O00159-3	MYO1C	General	0.033	0.042	-0.041	-0.004	0.031	0.036	-0.153	-0.204	-0.162	0.082	0.116	0.1055	0.985852	0.00966667	0.0062367	-0.184333	0.000345887	0.274167	170	83	120425	70.8
O00161	O00161	SNAP23	General	0.012	-0.029	-0.008	0.023	0.108	-0.067	-0.062	-0.081	-0.183	0.054	0.008	0.0965	0.952379	0.0296667	0.080291	-0.100333	0.0165684	0.1615	34	19	23696	88.6
O00165	O00165	HA	Endoplasmic Reticulum	-0.147	0.021	-0.079	0.057	0.089	0.012	-0.034	-0.022	0.059	0.014	0.054	-0.0355	0.780769	0.121	0.305522	0.0693333	0.854374	0.00983333	36	20	31619.9	69.1
O00170	O00170	AIP	General	0.067	0.044	0.082	0.103	0.021	0.024	-0.119	-0.127	-0.109	-0.043	-0.031	-0.0125	0.972557	-0.015	0.00242159	-0.182667	0.0319793	0.0895	49	24	38091.8	66.6
O00178	O00178	GTPBP1	General	-0.003	-0.007	-0.017	-0.029	-0.008	0.02	0.026	0.021	-0.005	-0.004	-0.033	0.0435	0.996126	0.00333333	0.507117	0.023	0.784912	-0.0118333	44	28	73080.2	47.5
O00180	O00180	KCNK1	General	-0.107	-0.04	-0.057	-0.015	0.106	-0.014	0.022	-0.018	-0.031	0.122	0.078	0.0475	0.805167	0.0936667	0.177579	0.059	0.0540102	0.0915	6	4	38655.9	23.2
O00186	O00186	STXBP3	General	0.023	-0.011	-0.005	-0.027	-0.017	-0.09	0.104	0.061	0.04	-0.029	0.002	-0.0105	0.881235	-0.047	0.117781	0.066	0.0637091	-0.0808333	59	38	68675.9	64.5
O00192	O00192	ARVCF	General	-0.272	0.191	-0.106	-0.182	0.053	0.022	-0.125	0.071	0.166	0.074	0.017	0.0365	0.98803	0.0266667	0.553272	0.0996667	0.955845	0.00516667	4	3	105325	6.2
O00193	O00193	SMAP	General	-0.001	0.004	0.096	0.104	-0.027	0.056	-0.056	-0.041	-0.013	-0.078	-0.084	0.0055	0.9867	0.0113333	0.163247	-0.0696667	0.742797	-0.0155	27	11	20389.2	38.2
O00194	O00194	RAB27B	Endoplasmic Reticulum	-0.149	-0.027	-0.013	0.028	0.029	-0.163	0.47	0.419	0.366	-0.084	0.006	-0.0495	0.972912	0.0276667	0.000517644	0.481333	0.000109458	-0.460833	14	10	24835.6	44.9
O00203	O00203	AP3B1	General	0.011	-0.044	-0.006	0.013	0.016	-0.009	0.002	0.005	-0.087	0.033	0.048	0.0415	0.944801	0.0196667	0.784528	-0.0136667	0.146965	0.0675	122	61	121888	56.2
O00213	O00213	APBB1	Endoplasmic Reticulum	0.12	0.027	-0.056	0.003	0.06	0.039	-0.091	-0.156	-0.147	-0.03	0.007	0.0515	0.997735	0.00366667	0.0365279	-0.161667	0.013354	0.140833	5	3	77984.5	4.6
O00217	O00217	NDUFS8	Mitochondria	0.007	0.086	-0.052	-0.019	0.01	-0.073	0.231	0.192	0.33	-0.078	-0.137	-0.1185	0.922664	-0.041	0.0105206	0.237333	0.000450546	-0.362167	26	16	24218.2	55.7
O00220	O00220	TNFRSF10A	General	-0.206	-0.095	-0.062	-0.029	0.129	-0.136	0.609	0.66	0.525	0.083	0.035	-0.0255	0.882873	0.109	0.000153472	0.719	7.89e-05	-0.567167	10	7	51286.3	15.3
O00221	O00221	NFKBIE	General	0.016	0.003	0.022	-0.026	-0.012	0.013	0.063	0.135	0.083	-0.061	-0.09	0.0055	0.937011	-0.022	0.0715907	0.08	0.0162075	-0.142167	14	9	53547.3	21.8
O00231	O00231	PSMD11	General	0.07	-0.062	-0.025	-0.032	-0.062	-0.016	0.014	0.028	0.023	0.023	0.028	0.0365	0.942647	-0.031	0.604787	0.0273333	0.84078	0.0075	93	34	47748.2	76.5
O00232	O00232	PSMD12	General	0	-0.081	-0.066	-0.057	-0.015	-0.024	0.144	0.097	-0.023	0.097	0.093	0.0805	0.966475	0.017	0.0906017	0.121667	0.771993	0.0175	91	40	53302.9	66
O00233	O00233	PSMD9	General	0.086	0.026	0.063	0.027	0.012	0.016	-0.069	-0.057	-0.174	0.012	-0.043	0.0695	0.886082	-0.04	0.0196843	-0.158333	0.0716227	0.112833	34	14	24852.5	78.4
O00255	O00255	MEN1	Endoplasmic Reticulum	-0.016	-0.065	-0.136	-0.048	-0.028	0.001	0.202	0.248	0.199	0.039	0.029	-0.0175	0.891276	0.0473333	0.00176551	0.288667	0.00193926	-0.1995	23	18	68421.5	38.8
O00257	O00257	CBX4	General	0.001	0.016	0.034	0.055	-0.067	0.033	-0.023	-0.06	0.019	-0.087	0.015	-0.0035	0.9867	-0.01	0.359207	-0.0383333	0.943255	-0.00383333	52	30	61708.7	48.9
O00264	O00264	PGRMC1	ER signal-anchored	-0.052	-0.037	-0.033	-0.036	0.049	-0.036	0.134	-0.017	-0.007	-0.028	0.095	0.0505	0.920152	0.033	0.211942	0.0773333	0.971416	0.0025	40	16	21784.9	58.4
O00267	O00267-2	SUPT5H	Endoplasmic Reticulum	-0.008	0.063	0.004	-0.027	-0.006	-0.059	0.086	0.087	0.003	-0.107	0.042	-0.0515	0.872523	-0.0503333	0.428536	0.039	0.118444	-0.0975	3	64	121397	58.7
O00267	O00267	SUPT5H	Endoplasmic Reticulum	-0.024	-0.039	-0.009	-0.014	-0.04	-0.017	0.111	0.12	0.086	-0.055	0.017	-0.0325	0.998591	0.000333333	0.00924664	0.129667	0.0127655	-0.129167	140	64	120896	58.8
O00268	O00268	TAF4	General	-0.01	-0.043	-0.027	-0.008	-0.048	-0.001	0.093	0.067	0.077	-0.055	-0.032	-0.0335	0.985852	0.00766667	0.0186246	0.105667	0.0105184	-0.119167	38	28	110398	34
O00273	O00273	DFFA	General	0.108	0.063	0.182	0.092	-0.009	-0.027	-0.081	-0.072	-0.128	-0.082	-0.077	-0.0395	0.814575	-0.099	0.00602469	-0.211333	0.498133	0.0275	36	23	36920.6	62.2
O00287	O00287	RFXAP	General	0.147	0.047	0.067	0.042	0.008	0.006	-0.065	-0.155	-0.019	-0.121	-0.074	-0.0235	0.82075	-0.0683333	0.0265261	-0.166667	0.911939	0.00683333	5	4	28574.2	16.5
O00291	O00291-4	HIP1	General	0.047	-0.046	0.044	0.002	0.07	0.072	-0.158	-0.405	-0.1	0.085	0.044	-0.0785	0.937011	0.033	0.0522171	-0.236	0.0436252	0.237833	2	51	117303	56.4
O00291	O00291	HIP1	General	-0.105	-0.018	-0.212	-0.177	0.062	0.107	0.146	0.174	0.078	0.113	0.135	0.0335	0.889251	0.109	0.0122311	0.244333	0.459182	-0.0388333	2	52	114158	55.4
O00299	O00299	CLIC1	Endoplasmic Reticulum	0.042	-0.105	-0.056	0.018	0.02	0.014	-0.081	-0.024	-0.091	0.076	-0.047	0.0775	0.886082	0.057	0.67059	-0.0256667	0.0886317	0.100833	83	24	27264.5	92.5
O00300	O00300	TNFRSF11B	General	0.132	-0.047	-0.129	-0.094	-0.129	-0.059	-0.356	-0.169	-0.36	0.064	0.106	-0.0105	0.901243	-0.0793333	0.0309071	-0.280333	0.0024194	0.348167	3	3	47451.6	7.4
O00303	O00303	EIF3F	General	0.056	-0.094	-0.133	-0.137	-0.012	-0.064	0.041	0.052	-0.021	0.11	0.063	0.0745	0.9867	-0.014	0.266173	0.081	0.181628	0.0585	65	19	37677.3	53.2
O00305	O00305	CACNB4	General	0.105	-0.148	0.036	0.068	0.007	0.062	-0.119	-0.115	-0.158	0.038	-0.025	0.0135	0.944703	0.048	0.151593	-0.128333	0.00906267	0.1395	10	4	58396.4	6.3
O00308	O00308	WWP2	General	-0.019	0.055	0.024	-0.029	0.035	-0.004	-0.055	0	-0.136	-0.001	0.044	-0.0335	0.955362	-0.0193333	0.157917	-0.0836667	0.229367	0.0668333	22	23	99480.8	26.5
O00311	O00311	CDC7	General	-0.017	-0.01	-0.033	0.005	-0.025	-0.006	0.133	0.167	0.094	-0.012	-0.088	0.0055	0.972557	0.0113333	0.00794917	0.151333	0.00944373	-0.162833	21	16	64685.8	27.8
O00327	O00327-7	ARNTL	General	0.009	-0.022	-0.205	-0.01	-0.036	0.059	-0.04	0	-0.013	0.122	0.05	0.0315	0.891276	0.077	0.476621	0.055	0.0761967	0.0855	11	11	69796.3	20.8
O00330	O00330	PDHX	Mitochondria	-0.028	0.044	-0.071	-0.011	0.023	-0.062	0.3	0.214	0.291	-0.038	-0.081	-0.0505	0.997839	0.00166667	0.00242159	0.286667	0.000307011	-0.324833	39	23	54349.5	46.1
O00370	O00370		General	0.139	-0.002	-0.002	-0.08	-0.019	0.078	-0.065	-0.036	0.076	0.066	0.125	0.1215	0.928288	-0.052	0.468078	-0.0533333	0.0657171	0.1125	8	8	150093	4.9
O00391	O00391	QSO	Endoplasmic Reticulum	-0.109	-0.121	0.02	0.153	-0.076	-0.119	0.057	0.326	0.289	-0.189	-0.12	-0.0055	0.944801	0.056	0.0228316	0.294	0.0104148	-0.328833	4	4	83375	4.2
O00399	O00399	DCTN6	General	-0.009	-0.022	0.033	0.022	-0.007	0.025	-0.093	0.008	-0.046	0.018	-0.024	0.0095	0.972557	0.0126667	0.355154	-0.0443333	0.327859	0.0448333	22	13	21089	68.4
O00400	O00400	SLC33A1	ER membrane	-0.219	-0.037	-0.083	0.024	0.169	-0.048	0.112	-0.038	-0.718	0.15	0.262	0.0405	0.805167	0.161333	0.714699	-0.101667	0.154319	0.3655	14	9	61421.3	20.7
O00401	O00401	WASL	General	-0.011	-0.018	0.043	0.069	0.008	0.002	-0.028	0.022	-0.011	-0.059	-0.084	0.0045	0.94848	0.0216667	0.809222	-0.0103333	0.365683	-0.0405	50	30	55225.3	58.6
O00408	O00408	PDE2A	Mitochondria	0.093	-0.052	0.058	0.004	-0.055	-0.099	0.184	0.082	0.107	-0.241	-0.066	-0.1215	0.85009	-0.083	0.169839	0.0913333	0.00433345	-0.267167	3	2	107427	1.7
O00409	O00409	FOXN3	General	-0.059	0.157	0.043	0.058	0.014	-0.018	-0.3	0.047	0.017	0.006	-0.065	-0.0525	0.966475	-0.029	0.35471	-0.125667	0.719055	0.0415	5	2	54347.4	3.2
O00410	O00410	IPO5	General	0.016	-0.066	-0.07	-0.04	0.016	-0.005	0.027	0.049	-0.078	0.077	0.045	0.0075	0.937011	0.0303333	0.50852	0.0393333	0.415388	0.0438333	256	69	125111	80.5
O00411	O00411	POLRMT	Mitochondria	-0.089	0.009	-0.102	-0.036	0.024	-0.078	0.332	0.316	0.371	0.02	-0.026	-0.0695	0.944801	0.0306667	0.000474153	0.400333	0.000180616	-0.364833	103	66	140387	60.8
O00418	O00418	EEF2K	General	0.127	0.081	0.172	0.144	0.061	0.05	-0.341	-0.345	-0.344	-0.064	-0.068	-0.0205	0.915696	-0.0416667	0.000118361	-0.47	0.000221457	0.2925	45	34	82713.2	47.7
O00423	O00423-3	EML1	General	0.016	0.036	-0.002	0.066	0.102	0.089	-0.231	-0.295	-0.33	0.095	0.046	-0.0225	0.753741	0.069	0.000934078	-0.302	0.000742485	0.324833	19	14	93010.7	16
O00425	O00425	IGF2BP3	General	0.052	0.058	0.098	0.107	0.018	0.057	-0.146	-0.166	-0.176	-0.01	0.037	0.0235	0.986252	-0.00866667	0.0011968	-0.232	0.00219047	0.1795	77	40	64046.2	62.5
O00429	O00429	DNM1L	Mitochondria	0.011	-0.083	-0.059	-0.035	0.002	-0.019	0.02	0.066	0.006	0.037	-0.016	0.0285	0.940308	0.0263333	0.138048	0.0743333	0.74269	-0.0141667	162	61	82389.2	87.2
O00442	O00442-2	RTCA	General	0.187	0.052	0.054	0.074	0.037	-0.026	-0.251	-0.222	-0.284	0.046	0.039	0.0635	0.886082	-0.0693333	0.00149494	-0.35	0.000233346	0.301833	34	18	41222.1	63
O00443	O00443	PIK3C2A	General	-0.005	-0.027	-0.002	-0.016	-0.012	0.005	0.076	0.029	-0.006	-0.005	0.018	-0.0315	0.993775	0.00366667	0.293442	0.0443333	0.366621	-0.0391667	101	75	192274	44.7
O00444	O00444	PLK4	General	-0.079	0.063	-0.033	0	-0.018	0.063	-0.115	0.113	0.146	-0.091	-0.089	-0.1595	0.946133	0.0313333	0.520693	0.0643333	0.0838169	-0.161167	2	2	109712	1.9
O00458	O00458	IFRD1	General	-0.138	-0.071	-0.169	-0.058	0.042	-0.017	0.493	0.5	0.496	0.04	-0.012	-0.0425	0.693269	0.115	5.4e-05	0.622333	3.04e-05	-0.501167	15	11	51066.5	29.4
O00459	O00459	PIK3R2	General	0.082	0.043	0.099	0.033	-0.029	0.011	-0.085	-0.033	-0.01	-0.055	-0.085	-0.0105	0.805167	-0.0696667	0.0273695	-0.117333	0.876724	-0.0075	37	35	81886.1	62.3
O00461	O00461	GOLIM4	General	-0.021	0.078	-0.018	0.009	0.089	-0.053	-0.055	-0.057	-0.118	-0.033	0.044	0.0565	0.997839	0.002	0.10497	-0.0896667	0.0584187	0.0991667	62	39	81935.9	52.5
O00462	O00462	MANBA	General	-0.014	-0.047	-0.109	-0.101	0.011	-0.018	0.211	0.226	0.093	0.131	0.092	0.0255	0.966475	0.0206667	0.0078049	0.233333	0.132584	-0.0938333	14	13	101863	18.2
O00463	O00463-2	TRAF5	General	0.057	0.058	-0.125	-0.207	-0.024	-0.071	0.142	0.197	0.074	0.037	-0.081	-0.1055	0.886082	-0.0973333	0.100322	0.141	0.0161037	-0.1875	8	8	67291.7	12.6
O00468	O00468-3	AGRN	General	-0.054	0.005	0.013	0.043	0	0.05	-0.004	-0.034	0.015	-0.049	0.004	-0.0575	0.886082	0.043	0.923656	0.00433333	0.525293	-0.0265	47	42	223500	26
O00469	O00469-2	PLOD2	Endoplasmic Reticulum	0.029	0.013	-0.003	0.033	0.015	0.03	-0.114	-0.145	-0.127	0.063	0.148	0.0835	0.966475	0.013	0.0065667	-0.141667	0.00131963	0.226833	87	46	87838.4	54.2
O00470	O00470	MEIS1	General	-0.062	0.033	0.028	-0.03	-0.018	-0.006	0.037	0.133	0.089	-0.067	-0.061	-0.0225	0.966475	-0.0176667	0.128165	0.0866667	0.0150664	-0.1365	13	10	43357.7	36.6
O00471	O00471	EXOC5	General	0.003	0.004	-0.005	0.012	0.029	0.002	-0.043	-0.018	-0.054	0.021	0.026	0.0065	0.959943	0.0136667	0.269612	-0.039	0.139327	0.0561667	55	37	82878.4	54.9
O00472	O00472	ELL2	General	-0.005	0.006	-0.034	-0.06	-0.096	-0.096	0.374	0.407	0.504	-0.025	0.07	-0.0475	0.737532	-0.073	0.000382982	0.439333	0.000338928	-0.429167	25	23	72779.5	42.8
O00478	O00478	BTN3A3	General	-0.061	-0.008	0.054	-0.09	0.031	-0.057	0.539	0.603	0.554	-0.171	-0.068	-0.1045	0.943258	-0.0336667	0.000116515	0.570333	1.6e-05	-0.679833	5	12	65514.3	22.2
O00479	O00479	HMGN4	General	-0.061	0.116	0.032	0.047	-0.046	-0.017	-0.064	-0.144	-0.013	-0.102	0.047	0.0245	0.948255	-0.0343333	0.177445	-0.102667	0.336152	0.0635	13	10	9538.7	54.4
O00481	O00481	BTN3A1	General	0.02	0.02	-0.05	-0.041	-0.058	0.036	-0.013	0.059	0.036	-0.035	-0.053	-0.0095	0.971904	-0.0176667	0.507391	0.0306667	0.163644	-0.0598333	2	10	58189.6	14.2
O00483	O00483	NDUFA4	Mitochondria	-0.032	0.093	0.003	0.011	0.088	-0.111	0.259	0.017	-0.057	0.041	-0.09	-0.0655	0.972912	-0.0253333	0.643886	0.0516667	0.282051	-0.111167	15	6	9426.7	55.5
O00487	O00487	PSMD14	General	0.04	-0.086	-0.065	-0.042	-0.044	-0.022	-0.005	0.042	0.063	0.082	0.05	0.0405	0.998591	0.001	0.219482	0.0703333	0.561938	0.0241667	50	20	34747.6	81.9
O00488	O00488	ZNF593	General	-0.047	0.02	-0.044	-0.009	-0.023	-0.003	0.05	0.119	-0.007	-0.056	0.016	-0.0405	0.972912	0.012	0.171624	0.0776667	0.140155	-0.0808333	14	11	15313	70.8
O00499	O00499-2	BIN1	General	0.073	0.045	0.114	0.047	-0.009	-0.003	-0.077	-0.036	-0.026	-0.077	-0.06	-0.0345	0.815969	-0.0656667	0.0200259	-0.123667	0.793465	-0.0108333	62	26	56669.2	60
O00505	O00505	KPNA3	General	-0.038	-0.056	-0.031	-0.003	-0.024	0.006	0.133	0.189	0.151	-0.061	-0.027	0.0105	0.886235	0.0346667	0.00227659	0.199333	0.00331299	-0.1835	68	32	58323.3	59.5
O00506	O00506	STK25	General	0.024	-0.01	0.038	-0.012	-0.05	-0.054	0.087	0.188	0.118	-0.128	-0.126	-0.0525	0.82075	-0.056	0.0407079	0.113667	0.00236811	-0.233167	9	16	48339	33.3
O00512	O00512	BCL9	General	-0.028	0.015	0.041	0.01	-0.058	-0.056	0.094	0.157	0.127	-0.131	-0.082	-0.1135	0.886515	-0.044	0.0270296	0.116667	0.000890674	-0.234833	27	24	149516	22.3
O00522	O00522	KRIT1	General	-0.096	-0.025	0.01	0.003	-0.005	0.037	-0.061	0.018	0.099	0.024	-0.098	-0.0855	0.886082	0.0486667	0.40169	0.0556667	0.280479	-0.0718333	8	8	85031.2	13.3
O00533	O00533-2	CHL1	General	-0.016	0.047	-0.129	-0.082	0.205	0.093	-0.097	-0.196	-0.414	0.14	0.092	0.0975	0.886515	0.104667	0.100634	-0.203	0.00700224	0.3455	6	3	137780	3.3
O00534	O00534	VWA5A	General	0.142	0.077	0.122	-0.072	-0.079	-0.127	-0.004	0.017	-0.02	-0.021	-0.054	-0.0305	0.161821	-0.206333	0.0209301	-0.116	0.378035	-0.0328333	39	27	87229.4	37.4
O00541	O00541	PES1	General	-0.022	-0.02	0.004	-0.015	-0.118	0.028	0.085	0.076	0.128	-0.103	-0.007	-0.0455	0.966475	-0.0223333	0.0214152	0.109	0.0114566	-0.148167	91	37	68400.8	48.4
O00559	O00559-2	EBAG9	General	-0.017	0.053	0.057	0.047	0.014	0.024	0.069	-0.051	-0.023	-0.047	0.107	0.0545	0.997735	-0.00266667	0.556746	-0.0326667	0.54034	0.0398333	4	4	29751.1	24.8
O00560	O00560	SDCBP	Endoplasmic Reticulum	0.018	0.036	0.084	0.05	0.021	-0.013	-0.011	0	-0.028	-0.072	-0.087	-0.0585	0.938626	-0.0266667	0.153587	-0.059	0.119488	-0.0595	36	18	32615	72.1
O00560	O00560-2	SDCBP	Endoplasmic Reticulum	-0.125	0.073	0.021	-0.035	0.056	-0.028	0.053	0.152	0.023	-0.078	-0.086	-0.0375	0.994172	0.008	0.28582	0.0863333	0.0220307	-0.143167	3	18	32486.9	72
O00562	O00562	PITPNM1	Endoplasmic Reticulum	0.004	0.031	0.044	0.059	-0.001	0.042	-0.052	-0.042	-0.106	0.011	0.059	-0.0235	0.9867	0.007	0.0472446	-0.093	0.0893596	0.0821667	15	14	135986	14.3
O00566	O00566	MPHOSPH10	General	-0.021	0.022	0.03	0.004	-0.082	-0.017	0.106	0.031	0.169	-0.154	-0.003	-0.0345	0.891276	-0.042	0.11749	0.0916667	0.0317098	-0.165833	65	31	78976.5	43.6
O00567	O00567	NOP56	General	-0.074	0.001	0.028	0.022	-0.086	0.003	0.11	0.066	0.181	-0.122	-0.035	-0.0715	0.996126	-0.00533333	0.0437856	0.134	0.00624759	-0.195167	102	43	66448.1	73
O00592	O00592	PODXL	General	-0.046	0.069	0.016	-0.006	0.078	-0.076	0.06	-0.041	0.001	-0.12	-0.033	0.0155	0.985852	-0.0143333	0.916965	-0.00633333	0.36303	-0.0525	34	16	59090.7	33.1
O00622	O00622	CYR61	Endoplasmic Reticulum	-0.027	-0.026	0.003	0.026	-0.06	-0.146	0.674	0.714	0.744	-0.198	-0.082	-0.3045	0.922718	-0.0433333	2.77e-05	0.727333	2.61e-05	-0.9055	14	14	44194	37.7
O00623	O00623	PE2	General	-0.073	0.137	0.025	0.117	-0.054	0.042	-0.144	-0.001	-0.057	-0.011	-0.02	0.0335	0.997735	0.00533333	0.248414	-0.097	0.217105	0.0681667	3	3	41081.7	11.6
O00625	O00625	PIR	General	0.005	-0.021	0.044	0.186	0.097	0.077	-0.497	-0.492	-0.473	0.064	0.008	0.0585	0.693269	0.110667	7.39e-05	-0.496667	1.9e-05	0.530833	39	16	32226.9	72
O00629	O00629	KPNA4	General	-0.043	-0.08	-0.06	-0.044	-0.013	-0.027	0.404	0.362	0.287	-0.024	-0.021	-0.0295	0.890021	0.033	0.000370037	0.412	0.000199087	-0.375833	37	28	58399.2	58.5
O00635	O00635	TRIM38	General	-0.007	-0.011	0.026	0.036	-0.027	-0.044	0.031	0.042	-0.007	-0.058	-0.06	-0.0305	0.972557	-0.0143333	0.617626	0.0193333	0.0832415	-0.0715	10	8	54670.1	16.3
O00716	O00716	E2F3	General	-0.037	-0.036	-0.035	-0.024	-0.001	-0.005	-0.005	0.099	0.109	-0.037	-0.007	-0.0235	0.914939	0.026	0.0639309	0.103667	0.0873329	-0.0901667	17	10	49560.1	24.9
O00743	O00743-3	PPP6C	General	0.136	-0.142	-0.193	-0.171	-0.056	-0.033	-0.051	-0.013	-0.113	0.17	0.131	0.1225	0.988024	-0.0203333	0.951692	0.00733333	0.0032222	0.200167	31	17	39744.8	52
O00750	O00750	PIK3C2B	Endoplasmic Reticulum	0.069	0.056	0.037	0.045	0.079	0.092	-0.373	-0.388	-0.512	0.049	0.044	0.0335	0.94848	0.018	0.00035735	-0.478333	0.000137781	0.4665	85	64	186932	48.7
O00754	O00754	MAN2B1	General	-0.014	-0.038	-0.068	0.012	0.062	0.069	-0.104	-0.086	-0.108	0.08	0.06	0.0505	0.693269	0.0876667	0.131177	-0.0593333	0.00273659	0.162833	50	34	114427	37.6
O00755	O00755	WNT7A	Endoplasmic Reticulum	0.021	0.007	-0.063	-0.011	0.023	0.039	-0.127	-0.043	-0.212	0.065	-0.007	0.0805	0.937011	0.0286667	0.10189	-0.115667	0.0211055	0.1735	7	3	40430.6	11.1
O00762	O00762	UBE2C	General	0.039	-0.125	0.03	-0.031	-0.043	0.006	0.022	0.111	0.015	-0.003	-0.095	0.0815	0.997735	-0.004	0.343846	0.068	0.403225	-0.0548333	29	15	19766.1	75.4
O00763	O00763	ACACB	Mitochondria	0.035	0.005	-0.13	0.006	-0.01	0.002	-0.083	-0.134	0.014	0.115	-0.077	0.0995	0.952379	0.0293333	0.624943	-0.0376667	0.160673	0.1135	7	20	278533	8
O00764	O00764	PDXK	General	0.17	0.044	-0.017	-0.021	0.032	0.01	-0.267	-0.215	-0.277	0.192	0.121	0.1135	0.902192	-0.0586667	0.00366619	-0.318667	0.000136502	0.395167	65	24	35329.9	72.7
O00767	O00767	SCD	ER membrane	-0.057	0.13	0.013	0.021	0.185	-0.019	0.059	-0.115	-0.334	0.042	0.178	-0.1455	0.967397	0.0336667	0.245076	-0.158667	0.278475	0.154833	21	12	41693	21.7
O14495	O14495	PLPP3	ER membrane	-0.062	0.061	-0.039	-0.194	0.009	-0.158	0.569	0.533	0.506	0.038	-0.113	-0.1075	0.866206	-0.101	0.000178828	0.549333	7.14e-05	-0.596833	4	3	35743	11.5
O14497	O14497	ARID1A	General	-0.04	-0.012	-0.02	0.005	-0.044	0.003	0.055	0.101	0.117	-0.066	0.016	-0.0235	0.972569	0.012	0.0199218	0.115	0.0275907	-0.1155	93	63	242953	34.7
O14503	O14503	BHLHE40	General	-0.117	-0.015	-0.051	-0.095	-0.036	-0.046	0.727	0.71	0.868	0.075	0.046	-0.0185	0.997735	0.002	8.59e-05	0.829333	3.56e-05	-0.734167	6	5	45965.7	13.3
O14513	O14513	NCKAP5	General	-0.097	-0.001	-0.095	-0.009	0.104	0.122	0.063	-0.062	-0.215	-0.084	-0.044	0.0745	0.693269	0.136667	0.944777	-0.007	0.574333	0.0535	4	4	210359	2.4
O14519	O14519-2	CDK2AP1	General	0.047	0.011	0.025	0.06	-0.132	-0.034	-0.068	-0.026	-0.013	-0.15	0.013	0.0125	0.891276	-0.063	0.122172	-0.0633333	0.931942	-0.00583333	15	7	9657.8	81.6
O14521	O14521	SDHD	Mitochondria	-0.047	-0.094	-0.364	-0.114	0.016	-0.009	0.362	0.236	0.189	0.389	0.441	-0.0825	0.881139	0.132667	0.00949774	0.430667	0.941515	-0.0131667	3	2	17328	5
O14523	O14523	C2CD2L	ER signal-anchored	-0.155	-0.088	-0.06	0.043	-0.005	0.024	0.272	0.267	0.255	-0.179	-0.028	-0.0015	0.584955	0.121667	0.000378209	0.365667	0.00122602	-0.334167	5	5	76636.4	12
O14524	O14524	NEMP1	General	-0.133	-0.079	-0.052	-0.006	0.016	-0.053	0.246	0.009	0.003	0.07	0.108	-0.0465	0.808644	0.0736667	0.0841964	0.174	0.660036	-0.0421667	9	7	51437.8	13.2
O14529	O14529	CUX2	General	0.071	0.097	0.017	-0.07	-0.017	-0.033	0.409	0.327	0.428	-0.085	-0.234	-0.0985	0.637757	-0.101667	0.0011421	0.326333	0.000161137	-0.527167	5	8	162188	4.5
O14530	O14530	TXNDC9	General	-0.015	0.012	0.063	0.011	0.002	-0.017	0.062	0.053	0.024	-0.079	-0.04	-0.0475	0.946133	-0.0213333	0.531616	0.0263333	0.0240724	-0.101833	34	21	26704.7	78.3
O14544	O14544	SOCS6	General	-0.027	0.069	0.146	0.015	-0.024	-0.121	0.346	0.306	0.405	-0.148	-0.125	-0.1165	0.826544	-0.106	0.00510885	0.289667	4.89e-05	-0.482167	6	5	59983.4	10.6
O14545	O14545	TRAFD1	General	0.133	0.09	0.111	0.095	-0.014	0.033	-0.157	-0.159	-0.19	-0.074	-0.045	0.0285	0.815969	-0.0733333	0.000525272	-0.28	0.0152055	0.1385	32	19	66266.3	37.6
O14548	O14548	COX7A2L	Mitochondria	0.031	0.068	-0.071	-0.005	0.022	-0.149	0.215	0.099	0.146	-0.258	-0.104	-0.0585	0.926588	-0.0533333	0.050294	0.144	0.00455797	-0.2935	7	5	12671.5	47.3
O14556	O14556	GAPDHS	General	0.057	0.028	0.038	0.033	0.056	-0.002	-0.116	-0.097	-0.204	0.047	-0.033	0.0245	0.972912	-0.012	0.00825551	-0.18	0.0164612	0.151833	8	2	44842.7	5.1
O14561	O14561	NDUFAB1	Mitochondria	-0.086	0.04	-0.141	-0.037	-0.052	-0.012	0.045	0.116	0.183	-0.004	-0.096	-0.0255	0.957714	0.0286667	0.0452055	0.177	0.0220783	-0.1565	22	5	17588.2	21.7
O14562	O14562	UBFD1	General	0.015	-0.025	0.047	0.002	-0.026	-0.024	-0.013	0.043	-0.013	-0.024	-0.045	0.0055	0.921259	-0.0283333	0.886695	-0.00666667	0.518499	-0.0268333	42	15	33495.5	46.9
O14578	O14578-4	CIT	General	0.002	0.026	0.029	0.025	0	0.009	0.008	0.005	-0.026	-0.057	-0.058	-0.0555	0.985852	-0.00766667	0.514615	-0.0233333	0.159896	-0.0525	104	84	238657	41.1
O14579	O14579	COPE	General	-0.015	-0.067	-0.045	0.037	0.001	0.006	-0.111	0.022	-0.016	0.064	0.057	0.0405	0.816964	0.057	0.900258	0.00733333	0.101307	0.0888333	82	32	34709.6	87.9
O14593	O14593	RFXANK	General	0.218	-0.012	-0.04	0.004	-0.014	-0.125	0.045	0.122	-0.011	0.01	0.141	-0.0975	0.886515	-0.100333	0.975103	-0.00333333	0.684557	-0.0341667	6	6	28215.9	35
O14613	O14613	CDC42EP2	General	0	-0.02	-0.013	-0.118	-0.032	-0.008	-0.032	0.023	-0.002	0.006	-0.065	0.0385	0.901243	-0.0416667	0.851468	0.00733333	0.949068	-0.00316667	4	4	22540.2	33.8
O14617	O14617-5	AP3D1	General	-0.005	-0.01	0.005	-0.023	0.007	-0.018	0.098	0.058	-0.048	-0.006	0.041	0.0095	0.984552	-0.008	0.481146	0.0393333	0.71065	-0.0211667	124	61	137790	50.4
O14618	O14618	CCS	General	0.081	0.077	0.071	0.073	0.04	-0.016	-0.122	-0.163	-0.129	-0.01	-0.056	-0.0025	0.886082	-0.044	0.00135554	-0.214333	0.0179354	0.115167	21	14	29553.6	55.8
O14638	O14638	ENPP3	General	0.047	-0.074	-0.16	-0.12	0.014	0.074	0.07	-0.103	-0.171	0.146	0.119	0.0525	0.943258	0.0516667	0.958096	-0.00566667	0.0504655	0.173833	2	2	102062	2
O14639	O14639	ABLIM1	General	0.011	0.026	0.037	0.081	0.012	0.047	-0.134	-0.15	-0.087	-0.057	0.081	0.0435	0.943258	0.022	0.00777902	-0.148333	0.0244109	0.146167	42	26	89568.8	37
O14641	O14641	DVL2	General	0.056	0.044	0.101	0.025	0.011	0.003	-0.072	-0.025	-0.103	-0.059	-0.023	-0.0275	0.82075	-0.054	0.018006	-0.133667	0.475263	0.0301667	37	24	79231.8	38.3
O14646	O14646	CHD1	General	-0.016	-0.022	0.008	-0.009	-0.061	-0.006	0.094	0.098	0.089	-0.072	-0.04	-0.0205	0.965428	-0.0153333	0.0182576	0.103667	0.00668396	-0.137833	128	84	197825	48
O14647	O14647	CHD2	General	-0.009	0.03	-0.037	0.014	-0.015	0.062	-0.025	-0.07	-0.036	0.002	0.073	0.0365	0.941618	0.0256667	0.351947	-0.0383333	0.0731356	0.0808333	51	54	212310	28.6
O14656	O14656	TOR1A	Endoplasmic Reticulum	-0.04	-0.124	-0.252	-0.123	-0.037	-0.041	0.171	0.113	0.009	0.17	0.172	0.1165	0.89568	0.0716667	0.0261315	0.236333	0.347881	0.0551667	20	13	38150.3	41.8
O14657	O14657	TOR1B	Endoplasmic Reticulum	-0.022	-0.141	-0.151	-0.054	-0.044	-0.036	0.265	0.335	0.286	0.072	0.058	0.0415	0.882873	0.06	0.000771776	0.4	0.000804668	-0.238167	16	9	38320.5	30.9
O14668	O14668	PRRG1	General	-0.07	0.221	0.23	0.074	0.016	-0.014	0.158	-0.155	-0.132	-0.243	-0.159	-0.2615	0.896546	-0.101667	0.2608	-0.17	0.106725	-0.178167	2	2	25174.9	6.4
O14672	O14672	ADAM10	Endoplasmic Reticulum	-0.125	-0.028	0.003	0.089	0.032	-0.056	0.094	0.015	0.001	-0.001	0.095	-0.0105	0.886082	0.0716667	0.16221	0.0866667	0.878322	-0.00883333	58	39	86194.6	48.2
O14678	O14678	ABCD4	ER membrane	0.18	0.125	-0.1	-0.059	-0.043	0.043	-0.274	-0.188	-0.353	0.06	0.018	-0.0435	0.901243	-0.088	0.0146948	-0.34	0.00274247	0.283167	3	3	69052.5	3.4
O14681	O14681	EI24	ER membrane	-0.137	0.015	-0.081	0.024	0.053	-0.002	0.116	-0.04	-0.026	-0.027	0.086	-0.0495	0.815969	0.0926667	0.274248	0.0843333	0.856387	-0.0135	11	7	39249.3	18.5
O14684	O14684	PTGES	General	-0.075	-0.07	-0.101	-0.016	0.068	-0.084	0.85	0.555	0.282	0.023	0.054	-0.0905	0.855077	0.0713333	0.00828191	0.644333	0.00825488	-0.566833	5	4	17330.2	24.3
O14686	O14686	KMT2D	General	-0.026	0.003	0.004	-0.04	-0.091	-0.003	0.129	0.144	0.157	-0.055	-0.031	-0.0605	0.900478	-0.0383333	0.00531386	0.149667	0.00133914	-0.192167	82	73	599940	16.1
O14709	O14709	ZNF197	General	0.011	0.018	-0.096	-0.064	-0.085	0.083	-0.091	0.059	-0.054	0.098	-0.005	0.0555	0.998766	0.000333333	0.931115	-0.00633333	0.210103	0.0781667	6	12	121926	10.1
O14713	O14713	ITGB1BP1	General	0.007	0.038	0.152	-0.093	-0.071	-0.14	0.04	0.136	0.062	-0.094	-0.101	0.0495	0.572126	-0.167	0.836674	0.0136667	0.0654355	-0.127833	3	3	22010.3	18.5
O14715	O14715	RGPD8	General	-0.089	-0.044	-0.025	-0.012	-0.039	-0.024	0.101	0.126	0.193	-0.054	0.007	-0.0375	0.921259	0.0276667	0.00620255	0.192667	0.00707292	-0.168167	17	91	200302	46.1
O14717	O14717	TRDMT1	General	-0.065	-0.041	-0.003	0.028	-0.006	-0.023	0.016	0.141	0.012	0.005	-0.04	-0.0675	0.900478	0.036	0.128321	0.0926667	0.124415	-0.0905	11	10	44938.1	42.7
O14727	O14727	APAF1	General	0.051	0.004	0.029	0.051	0.02	0.033	-0.097	-0.076	-0.129	0.063	-0.024	0.0255	0.9867	0.00666667	0.0133479	-0.128667	0.0216276	0.122167	42	33	144177	30.7
O14730	O14730	RIOK3	General	-0.021	-0.08	-0.054	0.037	0.011	0.018	0.001	-0.008	-0.019	-0.042	-0.014	0.0755	0.746041	0.0736667	0.262932	0.043	0.761961	0.0151667	29	18	59548.4	42.7
O14732	O14732	IMPA2	General	0.101	0.019	-0.015	0.016	0.068	0.061	-0.232	-0.298	-0.303	0.154	0.101	0.0745	0.980458	0.0133333	0.00155308	-0.312667	0.000156866	0.3875	26	14	31776.8	53.1
O14733	O14733-2	MAP2K7	General	0.028	-0.107	-0.014	-0.041	-0.032	-0.052	0.051	0.12	0.011	0.036	-0.035	0.0165	0.985852	-0.0106667	0.156593	0.0916667	0.27418	-0.0548333	31	22	52336.2	49.5
O14734	O14734	ACOT8	General	0.042	0.028	-0.044	0.003	-0.053	-0.003	-0.08	-0.079	0.049	0.076	0.066	0.0695	0.942978	-0.0263333	0.461863	-0.0453333	0.0646446	0.107167	17	12	36370	41
O14735	O14735	CDIPT	ER membrane	-0.326	-0.058	-0.108	-0.087	0.122	-0.133	0.603	0.475	0.258	0.079	0.138	-0.2325	0.886082	0.131333	0.00448172	0.609333	0.0140672	-0.4505	6	5	23880.7	25.3
O14737	O14737	PDCD5	General	0.039	-0.067	0.018	0.025	-0.069	-0.002	0.07	0.07	0.113	-0.021	-0.105	-0.0015	0.985852	-0.012	0.098351	0.0876667	0.0245592	-0.126833	42	14	14284.8	86.4
O14744	O14744	PRMT5	General	0.03	-0.036	0.043	-0.023	0.008	-0.002	0.013	0	-0.012	-0.02	-0.063	-0.0115	0.958527	-0.018	0.783658	-0.012	0.406756	-0.0318333	81	39	73367.2	65.4
O14745	O14745	SLC9A3R1	General	0.068	0.047	0.081	0.113	0.028	-0.003	-0.08	-0.047	-0.123	-0.071	-0.09	-0.0445	0.966475	-0.0193333	0.00953641	-0.148667	0.734597	0.0148333	76	33	39153	85.4
O14746	O14746	TERT	General	-0.018	0.028	0.12	0.032	-0.015	-0.075	0.032	0.067	0.02	-0.137	0.024	-0.1785	0.886515	-0.0626667	0.949765	-0.00366667	0.0671364	-0.136833	7	5	128649	3.4
O14757	O14757	CHEK1	General	0.024	-0.057	-0.023	-0.097	-0.086	-0.074	0.13	0.15	0.08	0.011	-0.026	0.0575	0.805167	-0.067	0.0185052	0.138667	0.0411431	-0.105833	35	23	55003.1	43.4
O14763	O14763	TNFRSF10B	General	-0.154	-0.004	-0.077	0.05	0.047	-0.166	0.464	0.521	0.486	-0.047	0.077	-0.1395	0.940308	0.0553333	0.000204373	0.568667	0.000258294	-0.526833	10	8	48904.5	21.8
O14770	O14770-5	MEIS2	General	-0.046	0.051	0.479	0.294	-0.222	-0.278	0.01	-0.126	0.377	-0.309	0.053	0.0665	0.900608	-0.23	0.753135	-0.0743333	0.415824	-0.150167	2	6	33178.3	22.8
O14771	O14771	ZNF213	General	-0.067	0.287	-0.394	-0.025	0.026	0.026	-0.136	-0.618	-0.565	0.173	0.112	0.1075	0.972912	0.067	0.15684	-0.381667	0.00537799	0.5705	5	3	52118.1	7.1
O14773	O14773	TPP1	General	-0.011	0.026	-0.051	0.062	0.091	-0.003	-0.117	-0.114	-0.086	0.057	0.151	0.0005	0.852038	0.062	0.0488953	-0.0936667	0.0116507	0.175167	32	15	61760.3	43.1
O14775	O14775	GNB5	General	0.032	-0.066	-0.038	-0.025	-0.01	0.02	0.115	0.192	0.184	-0.038	-0.106	-0.0255	0.961743	0.019	0.00891507	0.187667	0.00242346	-0.220167	7	7	44649.6	15.6
O14776	O14776	TCERG1	General	0.013	0.01	0.012	0.022	-0.073	0.013	0.021	0.013	0.017	-0.097	-0.023	-0.0115	0.944801	-0.0243333	0.879416	0.00533333	0.167556	-0.0608333	162	78	124127	49.4
O14777	O14777	NDC80	General	0.025	0.006	0.037	0.078	-0.001	0.004	-0.043	0.005	-0.02	-0.084	-0.055	-0.0125	0.994619	0.00433333	0.264724	-0.042	0.456859	-0.0311667	92	52	74424.8	73.5
O14782	O14782	KIF3C	General	0.1	0.03	-0.344	-0.098	0.122	-0.027	-0.129	-0.32	-0.486	0.222	-0.02	0.1505	0.958325	0.0703333	0.195814	-0.240333	0.00810087	0.429167	2	10	89652.9	9.3
O14786	O14786	NRP1	General	-0.077	0.071	-0.067	-0.051	-0.02	-0.093	0.246	0.268	0.451	-0.154	0.053	0.0905	0.950865	-0.0303333	0.00725564	0.346	0.0109483	-0.325167	8	8	104388	13
O14787	O14787-2	TNPO2	General	0.029	-0.065	-0.038	-0.064	0.045	0.015	0.045	-0.001	-0.093	0.051	0.087	-0.0005	0.959039	0.0233333	0.89758	0.00833333	0.275217	0.0621667	36	34	101947	48.9
O14802	O14802	POLR3A	General	-0.003	-0.032	-0.002	-0.037	-0.083	-0.008	0.223	0.255	0.247	-0.072	-0.069	-0.0235	0.920152	-0.0303333	0.000694868	0.254	0.000241731	-0.2965	121	82	157636	63.1
O14807	O14807	MRAS	Endoplasmic Reticulum	0.034	0.097	-0.084	0.003	0.092	-0.035	-0.152	-0.206	-0.361	0.074	0.068	-0.0075	0.997735	0.00433333	0.0233742	-0.255333	0.00492248	0.2845	5	5	23903.1	19.7
O14810	O14810	CPL	General	-0.01	-0.054	-0.016	-0.02	-0.007	-0.019	0.109	0.173	-0.004	-0.022	-0.058	-0.0605	0.972912	0.0113333	0.0883967	0.119333	0.0419203	-0.1395	11	6	15086.8	51.4
O14818	O14818	PSMA7	General	0.068	-0.01	-0.053	0.019	0.001	0.009	-0.117	-0.061	-0.024	0.076	0.014	0.0535	0.98803	0.008	0.231708	-0.069	0.0314641	0.115167	74	25	28057.5	80.6
O14827	O14827	RASGRF2	Endoplasmic Reticulum	0.026	0.068	0.011	-0.048	0.018	-0.119	0.095	-0.018	-0.093	-0.02	0.068	0.0745	0.815969	-0.0846667	0.549905	-0.0403333	0.500049	0.0461667	6	5	142245	2.6
O14828	O14828	SCAMP3	General	-0.089	0.039	0.052	0.03	0.033	-0.075	0.117	0.068	0.099	-0.12	-0.05	-0.0015	0.997735	-0.00466667	0.129175	0.094	0.0137005	-0.151833	27	16	38685.6	44
O14828	O14828-2	SCAMP3	General	-0.95	0.066	0.277	0.606	0.469	-0.022	-0.111	-0.026	0.58	-0.23	-0.53	-0.4395	0.858051	0.553333	0.438361	0.35	0.032836	-0.5475	3	12	35600.3	39.5
O14832	O14832	PHYH	Mitochondria	0.064	0.082	0.024	0.097	0.011	0.118	-0.206	-0.265	-0.224	-0.015	0.062	0.0285	0.966475	0.0186667	0.000744444	-0.288333	0.000796868	0.256833	17	10	38937	26
O14841	O14841	OPLAH	General	0.005	0.055	0.076	0.038	0.039	0.007	-0.084	0.002	-0.033	-0.055	-0.111	-0.0595	0.958325	-0.0173333	0.0992167	-0.0836667	0.413762	-0.0368333	39	31	138824	28.8
O14867	O14867	BACH1	General	0.052	0.059	0.073	0.006	0.022	0.005	-0.065	-0.08	-0.064	-0.058	-0.1	-0.0605	0.815969	-0.0503333	0.00739179	-0.131	0.936493	-0.00316667	17	15	83896.1	27
O14874	O14874	BCKDK	Mitochondria	-0.016	0.057	-0.072	-0.029	0.031	-0.037	-0.006	0.009	0.057	0.038	0.007	-0.0475	0.99832	-0.00133333	0.576688	0.0303333	0.656158	-0.0208333	23	16	46644.9	54.1
O14879	O14879	IFIT3	General	0.224	0.05	0.2	-0.101	-0.14	-0.224	0.935	0.983	0.94	-0.124	-0.165	-0.0325	0.263162	-0.313	9.14e-05	0.794667	3.79e-06	-1.05983	25	19	56725.5	49.1
O14893	O14893	GEMIN2	General	-0.028	-0.008	0.025	-0.001	0.006	0.003	0.003	-0.016	-0.014	0.02	0.011	-0.0095	0.9867	0.00633333	0.8931	-0.00533333	0.663796	0.0161667	21	16	32041	43.9
O14905	O14905	WNT9B	General	-0.212	0.08	0.152	0.07	0.009	-0.133	0.137	0.014	-0.024	-0.284	-0.206	-0.2655	0.9867	-0.0246667	0.79014	0.0356667	0.00202382	-0.294167	4	3	40426.5	7.2
O14907	O14907	TABP3	General	0.104	0.03	0.119	0.054	-0.018	-0.002	-0.069	-0.139	-0.158	0.048	-0.022	0.0325	0.82075	-0.073	0.00651632	-0.206333	0.0155891	0.1415	13	8	13734.5	81.4
O14908	O14908	GIPC1	General	0.001	0.01	0.038	0.011	0.025	-0.017	0.003	-0.021	-0.057	-0.074	-0.085	-0.0175	0.977806	-0.01	0.29622	-0.0413333	0.432032	-0.0338333	30	19	36162.7	70.2
O14917	O14917	PCDH17	General	0.057	0.116	0.073	0.017	0.027	-0.006	-0.295	-0.321	-0.235	-0.004	0.001	0.0035	0.802894	-0.0693333	0.000430729	-0.365667	0.000431572	0.283833	21	19	127482	22.6
O14920	O14920	IKBKB	Endoplasmic Reticulum	0.031	-0.024	-0.04	0.029	0.022	0.022	-0.125	-0.064	-0.141	0.08	0.045	0.0515	0.896546	0.0353333	0.0590039	-0.099	0.00462079	0.168833	34	27	87589.4	42.8
O14929	O14929	HAT1	General	0.044	-0.021	-0.009	0.057	0.001	0.056	-0.093	-0.037	-0.118	0.028	0.051	0.0475	0.91589	0.0333333	0.0830353	-0.0873333	0.0157286	0.124833	76	30	49911.1	73.9
O14936	O14936	CASK	General	-0.023	0.059	-0.059	-0.036	0.042	-0.048	0.018	0.015	0.004	0.014	0	-0.0375	0.993573	-0.00633333	0.688747	0.02	0.600554	-0.0201667	41	31	106034	35.6
O14939	O14939	PLD2	General	-0.072	0.174	0.067	-0.059	-0.006	-0.056	-0.065	-0.026	0.151	-0.057	0.014	-0.0515	0.880682	-0.0966667	0.738315	-0.0363333	0.489996	-0.0515	7	7	106784	9.3
O14949	O14949	UQCRQ	Mitochondria	-0.072	0.127	-0.044	0.036	0.017	-0.028	0.164	0.081	0.11	-0.125	-0.233	-0.2045	0.997735	0.00466667	0.150351	0.114667	0.000751371	-0.305833	16	9	9906.2	65.8
O14958	O14958	CASQ2	Endoplasmic Reticulum	0.079	-0.044	-0.068	0.017	0.027	0.17	-0.045	0.079	0.188	0.007	0.005	-0.1745	0.886082	0.0823333	0.346993	0.085	0.171278	-0.128167	4	5	46549	10
O14964	O14964	HGS	General	0.051	-0.018	0.033	0.052	0.031	-0.014	-0.06	-0.048	-0.055	-0.047	-0.01	0.0255	0.99832	0.001	0.0780568	-0.0763333	0.276233	0.0438333	68	37	86761.1	39.3
O14965	O14965	AURKA	General	-0.04	-0.057	-0.038	-0.003	-0.019	-0.076	0.239	0.333	0.253	-0.105	0.033	-0.0005	0.972912	0.0123333	0.000689014	0.32	0.00155834	-0.299167	37	23	46207.9	63
O14966	O14966	RAB29	Endoplasmic Reticulum	-0.06	-0.005	0.04	0.051	0.032	-0.033	0.192	0.048	0.032	-0.185	-0.062	-0.0985	0.950865	0.025	0.165556	0.099	0.0148593	-0.205833	14	8	23440.1	47.7
O14967	O14967	CLGN	ER membrane	-0.068	0.012	-0.008	0.159	0.159	0.107	-0.128	-0.231	-0.299	0.099	0.217	0.0795	0.336996	0.163	0.0183058	-0.198	0.00171508	0.351167	5	3	70493.7	5.5
O14972	O14972	DSCR3	General	0.145	0.064	0.11	-0.015	0.003	-0.047	-0.096	-0.033	-0.192	0.076	0.062	-0.0165	0.503777	-0.126	0.0117709	-0.213333	0.0363783	0.1475	6	4	33466.2	17.8
O14974	O14974	PPP1R12A	General	0.012	0.073	0.087	0.095	0.004	0.077	-0.153	-0.183	-0.142	-0.069	0.023	0.0365	0.99832	0.00133333	0.0025499	-0.216667	0.0110036	0.156167	117	68	115678	57.4
O14975	O14975	SLC27A2	ER membrane	-0.104	-0.073	-0.082	-0.022	0.029	-0.066	0.24	0.164	0.057	0.059	0.132	0.0175	0.82075	0.0666667	0.00844156	0.24	0.223354	-0.0841667	62	41	71109.8	61.1
O14976	O14976-2	GAK	General	0.035	0.005	0.03	-0.129	-0.155	-0.002	0.009	-0.022	0.077	0.017	0.023	-0.0035	0.74321	-0.118667	0.967039	-0.002	0.847111	-0.00916667	3	53	135774	44.5
O14976	O14976	GAK	General	0.04	0.004	0.031	0.051	0.009	0.031	-0.089	-0.06	-0.114	0.017	0.008	0.0235	0.988056	0.00533333	0.020021	-0.112667	0.0220783	0.103833	83	54	144671	42.3
O14977	O14977	AZIN1	General	0.01	-0.07	-0.01	-0.077	-0.053	-0.06	0.252	0.408	0.366	0.044	-0.125	0.0695	0.886515	-0.04	0.00157275	0.365333	0.00320367	-0.345833	10	7	50161.9	16
O14978	O14978	ZNF263	General	0.009	0.041	-0.006	0.102	-0.002	0.333	-0.164	-0.126	0.098	-0.015	0.053	-0.0395	0.873539	0.129667	0.391494	-0.0786667	0.47112	0.0635	6	12	78894.9	15.5
O14979	O14979	HNRNPDL	General	-0.009	0.038	0.063	-0.002	-0.058	-0.02	0.021	-0.045	0.128	-0.123	-0.011	-0.1025	0.83313	-0.0573333	0.954008	0.004	0.107554	-0.1135	7	23	46607.8	44.5
O14980	O14980	XPO1	General	-0.004	-0.079	-0.093	-0.065	-0.019	-0.018	0.152	0.17	0.026	0.06	0.059	-0.0285	0.944801	0.0246667	0.0258894	0.174667	0.172047	-0.0858333	190	67	124525	60.3
O14986	O14986-2	PIP5K1B	General	0.008	0	0.03	0.011	0.116	0.154	-0.501	-0.475	-0.029	-0.001	-0.021	0.0585	0.82075	0.081	0.0570276	-0.347667	0.0400915	0.347167	3	5	62826.6	11.6
O14994	O14994	SYN3	General	0.193	0.075	-0.224	-0.185	-0.022	0.161	-0.119	-0.247	-0.166	0.215	0.163	0.1985	0.9867	-0.03	0.177579	-0.192	0.000314975	0.3695	4	3	63529.8	6.3
O15013	O15013	ARHGEF10	General	0.019	-0.059	0.045	-0.025	0.006	0.007	-0.019	-0.027	-0.056	0.023	0.022	0.0255	0.991219	-0.00566667	0.453533	-0.0356667	0.129723	0.0575	35	27	152807	26
O15014	O15014	ZNF609	General	0.031	0.049	0.013	0.029	-0.058	0.02	-0.032	-0.039	-0.032	-0.083	0.009	-0.0565	0.919689	-0.034	0.0852811	-0.0653333	0.841759	-0.00916667	51	40	152444	29.3
O15015	O15015-2	ZNF646	General	0.01	0.046	-0.076	0.004	-0.052	0.101	-0.132	-0.093	0.409	-0.001	0.031	0.0315	0.969997	0.0243333	0.723063	0.068	0.816942	-0.0408333	27	22	205443	11.5
O15020	O15020	SPTBN2	General	0.034	0.1	0.107	0.084	0.014	0.08	-0.318	-0.384	-0.308	-0.021	0.055	0.0075	0.953588	-0.021	0.000306587	-0.417	0.000249884	0.3505	170	149	272689	60.3
O15021	O15021	MAST4	General	0.096	0.049	-0.003	0.079	0.056	-0.001	-0.045	-0.168	-0.171	0.091	0.043	0.0185	0.997735	-0.00266667	0.0222232	-0.175333	0.0117087	0.178833	6	5	286598	1.7
O15031	O15031	PLXNB2	General	-0.019	0.054	0.016	0.041	0.055	0	-0.106	-0.161	-0.199	0.031	0.08	0.0625	0.97081	0.015	0.00986781	-0.172333	0.00215281	0.213167	133	82	207862	52.9
O15037	O15037	KHNYN	General	-0.071	0.017	-0.046	0.008	0.036	-0.007	0.035	-0.031	0.058	-0.08	-0.028	0.0055	0.886082	0.0456667	0.290931	0.054	0.264211	-0.0548333	11	11	75274.3	20.2
O15040	O15040	TECPR2	General	-0.02	0.005	0.007	0.014	0.014	0.108	-0.092	0.015	-0.039	-0.002	0.024	0.0005	0.886082	0.048	0.441018	-0.036	0.314778	0.0461667	10	8	155842	7.8
O15042	O15042	U2SURP	General	-0.033	-0.021	0	0.005	-0.067	0.003	0.072	0.046	0.107	-0.052	0.055	-0.0155	0.997735	-0.00166667	0.0412212	0.093	0.119211	-0.0791667	121	60	118746	54
O15047	O15047	SETD1A	General	-0.019	0	0.016	0.025	-0.066	0.004	-0.024	0.018	0.054	-0.113	-0.024	-0.0635	0.982205	-0.0113333	0.688747	0.017	0.0983292	-0.0828333	49	36	186830	26.1
O15049	O15049	N4BP3	General	-0.003	0.005	0.034	0.008	-0.021	0.133	-0.116	-0.01	-0.02	-0.017	-0.058	0.0215	0.952379	0.028	0.228794	-0.0606667	0.555441	0.0308333	6	5	60925.2	10.1
O15050	O15050	TRANK1	General	-0.006	0.017	0.007	0.051	-0.032	0.096	-0.061	-0.17	0.042	-0.024	-0.06	-0.0315	0.937011	0.0323333	0.336691	-0.069	0.72739	0.0245	18	13	340551	6
O15054	O15054-1	KDM6B	General	0.057	-0.048	0.094	0.075	0.003	-0.026	-0.199	-0.042	-0.088	0.115	-0.032	-0.0235	0.978387	-0.017	0.0735898	-0.144	0.0890435	0.1295	3	3	182353	2.4
O15056	O15056	SYNJ2	General	0.062	0.039	0.043	0.05	0.032	0.094	-0.252	-0.246	-0.201	0.026	-0.047	-0.0145	0.977806	0.0106667	0.000550553	-0.281	0.00143738	0.221167	28	26	166676	18.6
O15060	O15060	ZBTB39	General	-0.034	0.177	-0.474	-0.102	0.009	0.027	-0.064	-0.693	-0.614	0.189	0.12	0.1655	0.958621	0.0883333	0.234369	-0.346667	0.0110454	0.615167	6	3	80711.4	2.3
O15061	O15061	SYNM	General	0.052	0.082	0.078	0.006	-0.038	0.027	-0.115	-0.103	-0.017	0.021	0.006	0.0335	0.784296	-0.0723333	0.0150186	-0.149	0.0525788	0.0985	43	36	173107	24.9
O15062	O15062	ZBTB5	General	-0.065	0.034	-0.049	-0.016	0.024	0.082	-0.031	-0.043	0.069	0.069	-0.027	0.0245	0.886082	0.0566667	0.673899	0.025	0.671717	0.0238333	11	10	75132.5	14
O15063	O15063	KIAA0355	General	0.044	-0.078	-0.038	0.026	-0.069	0.144	-0.056	-0.053	0.058	-0.037	-0.098	-0.1325	0.921857	0.0576667	0.917818	0.007	0.204351	-0.0721667	9	8	117273	11
O15066	O15066	KIF3B	General	-0.01	-0.062	-0.005	0.055	-0.018	-0.044	-0.02	0.053	0.067	-0.056	-0.059	0.0015	0.950865	0.0233333	0.220496	0.059	0.141971	-0.0711667	23	27	85237.8	38.6
O15067	O15067	PFAS	General	0.024	0.038	0.081	0.063	0.009	0.012	-0.118	-0.03	-0.081	-0.049	-0.086	0.0115	0.950865	-0.0196667	0.0265747	-0.124	0.482247	0.0351667	222	88	146386	72.1
O15084	O15084	ANKRD28	General	0.036	-0.051	0.007	0.01	-0.028	-0.001	-0.098	0.053	0.024	0.023	-0.057	0.0145	0.997303	-0.00366667	0.949442	-0.00433333	0.99427	0.0005	50	31	114675	38.8
O15085	O15085	ARHGEF11	General	0.058	-0.01	-0.031	0.03	0.046	0.054	-0.125	-0.197	-0.086	0.046	0.082	-0.0065	0.901243	0.0376667	0.0310896	-0.141667	0.00934497	0.1765	39	34	168557	25.4
O15091	O15091	KIAA0391	Mitochondria	-0.004	0.061	-0.167	-0.134	-0.005	-0.114	0.467	0.465	0.386	0.032	-0.002	-0.0415	0.944801	-0.0476667	0.00155308	0.476	9.16e-05	-0.443167	30	25	68055.8	43.2
O15111	O15111	CHUK	General	0.028	-0.103	-0.078	-0.082	-0.029	-0.053	0.059	0.115	0.041	0.07	0.034	0.0535	0.997735	-0.00366667	0.0591594	0.122667	0.654581	-0.0191667	41	28	85779.2	38.3
O15116	O15116	LSM1	General	-0.044	-0.027	0.001	0.021	-0.048	-0.053	-0.032	0.2	0.198	0.003	-0.096	-0.0615	0.997353	-0.00333333	0.116037	0.145333	0.0610603	-0.1735	15	10	15179.1	78.9
O15118	O15118	NPC1	Endoplasmic Reticulum	-0.058	-0.012	0.004	-0.035	0.023	-0.069	0.143	0.054	0.013	-0.043	0.103	-0.0185	0.993775	-0.005	0.115383	0.092	0.389812	-0.0561667	29	18	144960	12.3
O15119	O15119	TBX3	General	0.105	0.081	0.109	0.054	0.009	0.062	-0.473	-0.444	-0.463	-0.025	0.032	0.0505	0.82075	-0.0566667	3.73e-05	-0.558333	3.52e-05	0.479167	27	20	79786.8	26.9
O15120	O15120	AGPAT2	ER membrane	-0.106	-0.022	-0.031	-0.011	0.066	-0.039	-0.104	0.071	0.019	0.051	0.099	-0.1555	0.885527	0.0583333	0.480649	0.0483333	0.977561	0.00283333	5	4	31313.2	16.5
O15121	O15121	DEGS1	ER membrane	-0.244	0.067	0.019	0.06	0.014	-0.003	0.068	-0.026	0.104	-0.138	-0.021	-0.0225	0.921857	0.0763333	0.368271	0.101333	0.0966907	-0.109167	9	5	38036.5	17.9
O15126	O15126	SCAMP1	General	-0.056	0.033	0.027	0.085	0.013	-0.004	-0.082	-0.051	-0.033	-0.003	0.078	0.0245	0.942978	0.03	0.234159	-0.0566667	0.0625525	0.0885	25	13	38319.1	41.1
O15127	O15127	SCAMP2	General	-0.058	0.034	-0.077	0.091	0.064	0.04	-0.021	-0.034	-0.059	-0.052	0.158	0.0285	0.75344	0.0986667	0.934756	-0.00433333	0.227411	0.0828333	7	5	37104.6	16.7
O15131	O15131	KPNA5	General	0.06	-0.113	-0.251	-0.202	-0.062	0.001	0.019	0.071	-0.035	0.215	0.122	0.1115	0.992005	0.0136667	0.253938	0.119667	0.0357008	0.131167	9	20	61089.6	27.6
O15143	O15143	ARPC1B	General	-0.03	-0.01	0.077	0.104	0.003	0.037	-0.098	-0.016	-0.011	-0.067	-0.048	-0.0165	0.937011	0.0356667	0.332713	-0.054	0.963838	-0.00216667	12	21	41747.8	65
O15144	O15144	ARPC2	General	0.021	-0.117	-0.204	-0.09	0.001	-0.067	0.031	0.048	-0.052	0.139	0.124	0.0995	0.940308	0.048	0.194678	0.109	0.0356552	0.111833	73	34	34446.5	88.6
O15145	O15145	ARPC3	General	0.027	-0.053	0	0.057	0.049	-0.004	-0.046	-0.034	-0.114	0.008	0.042	0.0855	0.890021	0.0426667	0.25342	-0.056	0.0390667	0.109833	26	12	20774.5	57.8
O15151	O15151	MDM4	General	0.134	0.108	0.201	0.08	0.003	0.016	-0.144	-0.075	-0.063	-0.116	-0.137	-0.0065	0.649813	-0.114667	0.00338715	-0.241667	0.901718	0.0075	8	8	55890.3	24
O15155	O15155	BET1	ER tail-anchored	-0.18	-0.056	0.075	0.043	-0.175	-0.037	0.2	0.118	0.118	-0.178	-0.024	-0.0775	0.99832	-0.00266667	0.0478415	0.199	0.00481445	-0.2385	5	2	13403.3	24.5
O15156	O15156-2	ZBTB7B	General	0.038	0.064	0.048	0.114	-0.008	0.136	-0.261	-0.235	-0.134	0.05	0.112	0.0885	0.944801	0.0306667	0.00283188	-0.26	0.0010443	0.2935	22	12	62495.7	20.9
O15160	O15160	POLR1C	General	-0.013	-0.037	-0.001	-0.024	-0.059	0.008	0.02	0.046	0.074	-0.042	-0.045	0.0445	0.985852	-0.008	0.117169	0.0636667	0.20051	-0.0608333	30	18	39477.2	62.4
O15162	O15162	PLSCR1	General	-0.07	-0.067	-0.202	-0.125	0.103	-0.167	0.3	0.224	-0.081	0.256	0.342	0.0945	0.950865	0.05	0.0746843	0.260667	0.535428	0.0831667	5	3	36075.4	11.6
O15164	O15164	TRIM24	General	0.064	0.009	0.041	-0.029	-0.062	-0.007	-0.025	-0.034	-0.048	-0.021	0.022	0.0165	0.805167	-0.0706667	0.0747118	-0.0736667	0.271878	0.0415	66	43	118769	55.6
O15169	O15169	AXIN1	General	-0.018	0.053	0.034	0.01	-0.06	-0.002	0.17	0.219	0.236	-0.103	-0.097	-0.0255	0.900478	-0.0403333	0.00557589	0.185333	0.000627705	-0.2835	19	17	96546.1	19
O15173	O15173	PGRMC2	Endoplasmic Reticulum	0.008	0.01	0.006	0.057	0.111	-0.014	0.016	-0.143	-0.077	-0.052	0.085	0.0735	0.901243	0.0433333	0.201274	-0.076	0.146866	0.1035	25	14	23875.1	45.2
O15194	O15194	CTDSPL	General	0	-0.041	-0.196	-0.096	0.023	-0.161	0.142	0.221	0.026	-0.059	0.13	0.0825	0.998591	0.001	0.046809	0.208667	0.34193	-0.0785	4	4	31527.4	15.5
O15211	O15211	RGL2	General	0.011	-0.017	-0.136	-0.025	0.098	0.017	0.016	0.05	0.077	0.017	-0.109	-0.0255	0.881235	0.0773333	0.1311	0.095	0.111202	-0.0868333	5	5	84061	8.7
O15212	O15212	PFDN6	General	0.063	-0.015	0.066	0.035	-0.014	0.003	-0.005	-0.021	-0.01	-0.102	-0.101	-0.0325	0.934796	-0.03	0.253261	-0.05	0.122714	-0.0665	40	20	14582.4	84.4
O15213	O15213	WDR46	General	-0.024	0.051	0.062	-0.006	-0.07	0.029	-0.014	-0.016	-0.002	-0.084	-0.011	-0.0635	0.902192	-0.0453333	0.354381	-0.0403333	0.29929	-0.0421667	60	37	68526.3	63.7
O15226	O15226-2	NKRF	General	0.009	-0.024	0.001	-0.034	-0.119	-0.015	0.129	0.153	0.249	-0.072	-0.002	-0.0045	0.886082	-0.0513333	0.0100312	0.181667	0.00564966	-0.203167	120	53	80179.4	74
O15228	O15228	GNPAT	General	0.023	0.019	-0.092	-0.017	0.044	0.059	-0.076	-0.119	-0.145	0.049	0.147	0.0515	0.912168	0.0453333	0.10189	-0.0966667	0.00488379	0.195833	40	30	77985.3	52.2
O15230	O15230	LAMA5	General	-0.091	-0.024	-0.02	-0.011	-0.022	-0.001	0.246	0.24	0.247	-0.086	-0.036	-0.0725	0.906424	0.0336667	0.000682075	0.289333	0.000167304	-0.309167	111	88	412282	27.6
O15231	O15231-9	ZNF185	General	0.096	0.069	0.044	0.107	0.092	0.072	-0.173	-0.161	-0.242	0.081	-0.095	0.0855	0.943258	0.0206667	0.00152458	-0.261667	0.0134606	0.215833	8	8	35752.1	37.9
O15234	O15234	CASC3	General	-0.048	-0.003	0.022	-0.007	0.003	0	-0.011	0.015	0.056	-0.057	-0.057	-0.0405	0.985852	0.00833333	0.500124	0.0296667	0.0904165	-0.0715	32	20	76390.7	40.1
O15235	O15235	MRPS12	Mitochondria	0.11	0.002	-0.075	-0.077	-0.078	-0.125	0.301	0.248	0.038	-0.173	-0.029	0.0495	0.815969	-0.105667	0.103139	0.183333	0.0359935	-0.2465	7	5	15572	36.9
O15254	O15254	ACOX3	General	0.017	0.009	0.088	0.033	-0.012	0.146	-0.273	-0.066	-0.101	-0.024	-0.037	0.0075	0.977806	0.0176667	0.0425952	-0.184667	0.0864288	0.128833	6	6	78369.3	10.8
O15258	O15258	RER1	General	-0.192	-0.056	-0.139	-0.227	0.108	-0.023	0.285	0.127	-0.015	0.167	0.071	-0.0755	0.921622	0.0816667	0.034277	0.261333	0.479585	-0.0781667	6	3	23071.6	18.8
O15260	O15260	SURF4	ER membrane	-0.143	0.014	-0.141	-0.037	0.146	-0.025	0.266	0.08	-0.013	0.09	0.045	-0.0695	0.834494	0.118	0.0816144	0.201	0.348152	-0.0891667	9	4	30621.7	14.1
O15264	O15264	MAPK13	General	0.076	0.061	-0.076	-0.01	-0.016	-0.006	-0.044	0.009	0.088	0.055	-0.086	-0.0515	0.947894	-0.031	0.97252	-0.00266667	0.480654	-0.0451667	4	2	42260	7.6
O15265	O15265-2	ATXN7	General	0.01	0.021	0.024	0.005	-0.105	0.037	-0.079	-0.023	0.007	-0.093	0.03	-0.0085	0.921622	-0.0393333	0.244587	-0.05	0.892457	0.00783333	14	13	102365	14.2
O15269	O15269	SPTLC1	ER signal-anchored	-0.041	0.009	0.01	0.007	0.014	0.021	-0.035	-0.119	-0.068	0.037	0.069	0.0715	0.940308	0.0213333	0.155147	-0.0666667	0.0133546	0.133167	44	25	53313.5	53.9
O15270	O15270	SPTLC2	ER membrane	0.028	0.028	-0.002	0.048	0.023	0.046	-0.023	-0.078	-0.035	-0.014	0.087	0.0405	0.940308	0.021	0.121495	-0.0633333	0.0950804	0.0831667	50	30	63607.8	53.5
O15287	O15287	FANCG	General	0.094	0.025	-0.032	-0.031	0.025	0.084	-0.112	-0.116	-0.163	0.066	0.027	0.0245	0.997735	-0.003	0.0180509	-0.159333	0.00353673	0.1695	25	20	69465.2	34.7
O15294	O15294	OGT	Endoplasmic Reticulum	0.025	-0.012	0.003	0.008	-0.021	-0.004	-0.021	0.045	0.021	-0.04	-0.014	-0.0145	0.972912	-0.011	0.81668	0.00966667	0.34388	-0.0378333	104	50	118178	59.5
O15297	O15297	PPM1D	General	-0.063	0.05	0.033	-0.101	-0.017	0.016	-0.009	0.004	0.147	-0.06	0.001	-0.0165	0.93493	-0.0406667	0.56741	0.0406667	0.237108	-0.0725	7	7	67415.7	15.2
O15304	O15304	SIVA1	General	0.038	0.047	0.101	0.101	0.058	0.046	-0.16	-0.129	-0.093	-0.006	-0.08	0.0295	0.98803	0.00633333	0.00476284	-0.189333	0.0490663	0.1085	5	4	19607.2	29.7
O15305	O15305	PMM2	General	0.127	0.022	0.088	0.078	0.017	-0.021	-0.086	-0.112	-0.112	-0.071	-0.028	0.0475	0.886515	-0.0543333	0.00697064	-0.182333	0.0931251	0.0861667	43	21	28424	74.7
O15318	O15318	POLR3G	General	0.002	-0.025	0.024	-0.052	-0.059	0.007	0.314	0.296	0.34	-0.104	-0.108	-0.0355	0.906202	-0.035	0.000382868	0.316333	9.49e-05	-0.399167	9	7	25971.1	36.3
O15344	O15344	MID1	General	0.027	-0.032	0.001	0	-0.042	-0.031	0.05	0.095	0.076	-0.026	-0.036	-0.0465	0.940308	-0.023	0.0841999	0.075	0.01646	-0.109833	42	30	76961	49.3
O15347	O15347	HMGB3	General	0.092	-0.018	0.068	0.085	-0.041	0.071	-0.101	-0.139	-0.122	-0.059	-0.012	0.0675	0.989839	-0.009	0.0114018	-0.168	0.0366885	0.1195	57	23	23150.7	69
O15355	O15355	PPM1G	General	0.031	0.002	0.039	0.011	-0.018	-0.013	-0.004	0.006	-0.019	-0.107	-0.027	-0.0265	0.901243	-0.0306667	0.407263	-0.0296667	0.272881	-0.0478333	75	32	59955.3	64.2
O15357	O15357	INPPL1	General	-0.006	-0.066	-0.064	-0.014	0.004	-0.008	0.015	0.018	-0.017	0.057	0.038	0.0345	0.886082	0.0393333	0.220496	0.0506667	0.306439	0.0378333	99	58	139395	49.2
O15360	O15360	FANCA	General	0.019	0.058	0.027	0.066	0.038	0.115	-0.149	-0.189	-0.184	0.058	0.122	0.0215	0.895381	0.0383333	0.00182577	-0.208667	0.00132911	0.241167	32	25	164940	25.8
O15370	O15370	SO2	General	0.004	-0.036	0	0.03	0.003	0.085	-0.171	0.063	0.077	-0.019	-0.091	0.1295	0.875329	0.05	0.997657	0.000333333	0.877662	0.0168333	7	4	34292.4	12.3
O15371	O15371	EIF3D	General	0.016	-0.015	0.033	0.003	-0.045	0.02	-0.061	-0.016	-0.018	0.007	0	0.0155	0.952379	-0.0186667	0.276023	-0.043	0.299427	0.0391667	134	40	64599.2	70.8
O15379	O15379	HDAC3	General	0.041	0.007	-0.061	-0.033	-0.026	-0.034	0.016	0.032	-0.065	0.074	0.11	0.0595	0.940308	-0.0266667	0.982091	-0.00133333	0.0837751	0.0868333	19	13	49531.5	45
O15381	O15381	NVL	General	0.002	0.017	0.022	0.009	-0.047	0.024	-0.011	-0.039	0.016	-0.085	0.029	-0.0095	0.952379	-0.0183333	0.502995	-0.025	0.840315	-0.0105	108	55	96076.2	68.4
O15382	O15382	BCAT2	Mitochondria	-0.135	-0.187	-0.517	-0.461	-0.06	-0.061	0.114	0.24	0.249	0.311	0.066	0.1545	0.953922	0.0856667	0.0100026	0.480667	0.790546	-0.0238333	18	12	44686.3	34.9
O15397	O15397	IPO8	General	-0.009	-0.019	-0.104	-0.039	0.052	0.007	0.052	0.061	-0.071	0.082	0.119	-0.0215	0.886515	0.0506667	0.359207	0.058	0.488423	0.0458333	59	39	121020	44.9
O15400	O15400	STX7	ER tail-anchored	-0.037	0.041	0.012	0.072	0.035	-0.024	-0.053	-0.073	-0.074	0.003	0.034	0.0105	0.95358	0.0223333	0.102583	-0.072	0.0440647	0.0825	21	12	29929.1	46.7
O15409	O15409-4	FOXP2	General	-0.016	0.026	0.002	0.096	0.061	0.088	-0.189	-0.039	-0.027	0.028	-0.032	-0.1105	0.693269	0.0776667	0.180415	-0.089	0.510222	0.0468333	11	10	83077.2	19.5
O15417	O15417	TNRC18	General	-0.007	-0.043	-0.018	-0.038	-0.058	0.026	0.005	0.057	0.159	-0.066	-0.035	-0.0915	0.998591	-0.000666667	0.118365	0.0963333	0.0346838	-0.137833	31	29	316168	12.3
O15427	O15427	SLC16A3	General	-0.155	0.039	-0.109	-0.014	0.098	-0.313	0.372	0.286	0.048	-0.121	0.059	-0.0285	0.998591	-0.00133333	0.0326905	0.310333	0.03356	-0.2655	19	10	50096.1	15.2
O15438	O15438-4	ABCC3	General	-0.026	-0.013	-0.044	-0.064	-0.008	-0.039	0.382	0.327	0.374	0.045	0.133	0.0605	0.982599	-0.00933333	0.000179795	0.388667	0.000661375	-0.2815	13	15	176558	12.2
O15439	O15439	ABCC4	General	-0.032	0.079	-0.046	-0.007	0.143	-0.02	-0.127	-0.277	-0.321	0.069	0.14	0.1125	0.948255	0.0383333	0.0180298	-0.242	0.00148044	0.348833	62	42	150437	36.1
O15440	O15440	ABCC5	General	-0.031	0.018	-0.048	-0.007	0.101	-0.031	0.028	-0.093	-0.043	0.076	0.062	0.0515	0.920863	0.0413333	0.775628	-0.0156667	0.0611432	0.0991667	24	22	161742	15
O15446	O15446	CD3EAP	General	-0.042	-0.033	0.011	-0.017	-0.073	0.013	0.141	0.141	0.209	-0.064	0.007	-0.0465	0.996126	-0.00433333	0.00527967	0.185	0.00308684	-0.198167	34	19	55269.9	57.8
O15457	O15457	MSH4	General	0.087	-0.139	-0.187	-0.294	-0.004	0.044	-0.018	-0.031	-0.191	0.199	0.164	0.1035	0.997839	-0.005	0.998115	-0.000333333	0.00839191	0.2355	4	3	105838	3.4
O15460	O15460	P4HA2	Endoplasmic Reticulum	-0.014	0.066	0.03	0.183	0.04	0.096	-0.295	-0.331	-0.301	0.032	0.166	0.0455	0.834494	0.079	0.00043232	-0.336333	0.000309215	0.390167	48	28	61300.2	58.1
O15498	O15498	YKT6	General	-0.04	-0.037	-0.006	0.03	0.099	-0.039	0.118	0.014	-0.065	0.063	0.01	0.0075	0.886082	0.0576667	0.440379	0.05	0.946764	0.0045	25	12	22588.3	62.1
O15504	O15504	NUPL2	General	-0.013	-0.044	-0.038	0.04	-0.013	0.012	0.044	-0.006	-0.005	-0.003	0.118	0.0415	0.869992	0.0446667	0.272019	0.0426667	0.413388	0.0411667	32	19	45041.9	53.6
O15511	O15511	ARPC5	General	0.079	-0.012	0.013	0.03	0.011	0.023	-0.1	-0.116	-0.16	0.013	0.036	0.0585	0.991219	-0.00533333	0.0141812	-0.152	0.00467798	0.161167	41	15	16377.2	85.4
O15514	O15514	POLR2D	General	0.009	0.005	0.002	-0.016	-0.034	0.027	-0.06	0.014	0.055	-0.086	-0.05	-0.0535	0.971904	-0.013	0.963853	-0.00233333	0.178894	-0.0661667	19	8	16425.1	74.6
O15516	O15516	CLOCK	General	-0.011	0.015	0.046	0.064	0.007	0.033	0.001	0.093	0.039	0.071	0.046	-0.0315	0.953922	0.018	0.548214	0.0276667	0.767104	-0.0158333	9	7	95815.6	6.8
O15519	O15519-6	CFLAR	General	0.031	0.024	0.024	0.047	0.048	0.053	0.022	-0.065	-0.168	0.02	0.068	0.0355	0.921259	0.023	0.156998	-0.0966667	0.0974354	0.1115	6	4	51230.3	8.1
O15525	O15525	MAFG	General	-0.048	-0.068	-0.063	-0.06	0.019	0.063	0.229	0.168	0.332	-0.084	0.074	-0.0085	0.83313	0.067	0.00258113	0.302667	0.0080025	-0.249167	5	8	17906.3	39.5
O15527	O15527-4	OGG1	Mitochondria	0.153	0.027	-0.001	0.047	-0.069	0.044	-0.092	-0.037	0.095	0.049	-0.082	0.0375	0.920152	-0.0523333	0.388518	-0.071	0.870397	0.0128333	4	4	47863.5	10.1
O15530	O15530	PDPK1	General	0.106	-0.069	-0.031	0.025	0.024	-0.055	-0.057	-0.04	-0.147	0.069	0.086	0.0755	0.997735	-0.004	0.257604	-0.0833333	0.00950627	0.158167	28	20	63664.2	44.6
O15533	O15533-3	TAPBP	ER membrane	-0.048	0.069	0.123	0.022	-0.108	-0.077	0.237	0.171	0.174	-0.261	-0.152	-0.1535	0.831386	-0.102333	0.0509948	0.146	0.000301563	-0.382833	18	8	54455.7	18.6
O15534	O15534	PER1	General	-0.023	-0.006	0.032	-0.032	-0.076	-0.031	0.024	0.043	0.021	-0.029	-0.016	-0.0695	0.869992	-0.0473333	0.452387	0.0283333	0.0979112	-0.0675	13	12	137750	11.9
O15541	O15541	RNF113A	General	-0.027	0.006	0.016	0.024	0	0.021	-0.011	0.023	-0.001	-0.078	-0.076	-0.0435	0.952379	0.0166667	0.8931	0.00533333	0.0839384	-0.0695	34	20	39528.2	47.8
O15554	O15554	KCNN4	General	-0.011	0.04	0.03	0.042	0.047	-0.117	0.328	0.313	0.18	-0.068	-0.063	-0.0505	0.95776	-0.029	0.00551014	0.254	0.000759759	-0.334167	6	4	48208.2	8.6
O43143	O43143	DH5	General	0.002	-0.089	-0.155	-0.103	-0.058	0.013	0.05	0.023	0.017	0.086	0.136	0.0685	0.952379	0.0313333	0.0827458	0.110667	0.117906	0.0668333	190	64	91730	66.9
O43147	O43147-2	SGSM2	General	0.009	-0.124	-0.201	0.022	-0.023	0.076	-0.003	-0.118	0	0.237	0.148	-0.0435	0.805167	0.130333	0.427244	0.065	0.112439	0.154167	6	5	119789	4.7
O43148	O43148-2	RNMT	General	0.006	-0.058	-0.02	-0.053	-0.1	-0.025	0.133	0.165	0.175	-0.039	-0.012	0.0195	0.911368	-0.0353333	0.00413905	0.181667	0.0036478	-0.168167	53	31	58408.2	50.3
O43149	O43149	ZZEF1	General	0.002	0.005	0.011	0.005	0.068	0.062	-0.13	-0.072	-0.18	0.062	0.056	0.0265	0.886083	0.039	0.0211169	-0.133333	0.00591215	0.1755	82	69	335976	26
O43150	O43150	ASAP2	General	0.078	-0.01	0.016	-0.012	0.002	0.009	-0.116	0.025	0	-0.007	-0.048	-0.0235	0.93493	-0.0283333	0.346993	-0.0583333	0.943255	0.00416667	15	17	112904	20.4
O43151	O43151-4	TET3	General	0.115	0.022	-0.027	-0.039	-0.055	0.135	0.032	-0.064	-0.104	0.08	0.035	0.0225	0.977806	-0.023	0.238634	-0.082	0.108486	0.0911667	10	10	195926	6.4
O43156	O43156	TTI1	General	-0.028	-0.013	-0.117	-0.032	0.034	0.005	0.022	0.07	-0.024	0.077	0.054	0.0005	0.886063	0.055	0.18242	0.0753333	0.668194	0.0211667	39	29	123551	31.4
O43157	O43157	PLXNB1	General	-0.02	0.069	-0.029	0.051	0.12	-0.015	-0.061	-0.173	-0.024	0.022	0.071	0.0095	0.920152	0.0453333	0.170781	-0.0926667	0.0567522	0.120167	11	11	235546	5.5
O43159	O43159	RRP8	General	-0.025	0.023	0.037	0.071	-0.041	-0.005	-0.002	0.006	0.014	-0.096	0.04	-0.0585	0.997735	-0.00333333	0.890551	-0.00566667	0.391765	-0.0441667	45	24	51455.6	62
O43164	O43164	PJA2	Endoplasmic Reticulum	-0.042	-0.02	0.069	-0.005	-0.023	0.015	-0.025	0.112	0.139	-0.055	-0.107	-0.0035	0.989839	-0.00666667	0.307166	0.073	0.0660234	-0.1305	25	17	79239.7	34.1
O43166	O43166	SIPA1L1	General	0.001	0.097	-0.037	0.15	0.048	0.08	-0.375	-0.276	-0.399	0.065	0.092	-0.0165	0.873539	0.0723333	0.00171386	-0.370333	0.000404095	0.396833	16	17	201223	10.8
O43167	O43167	ZBTB24	General	0.016	-0.005	-0.055	-0.047	-0.117	0.026	0.124	0.176	0.191	0.007	-0.012	-0.0135	0.944801	-0.0313333	0.00652952	0.178333	0.00353673	-0.169833	17	16	79421.8	21.6
O43172	O43172	PRPF4	General	0.003	0.011	0.025	0.029	-0.093	-0.007	0.007	0.083	0.136	-0.135	-0.036	-0.0445	0.920152	-0.0366667	0.232662	0.0623333	0.0285639	-0.147167	82	34	59132.8	72
O43175	O43175	PHGDH	General	0.07	0.047	0.073	0.125	0.048	0.072	-0.264	-0.235	-0.3	0.037	-0.008	-0.0085	0.953588	0.0183333	0.000356098	-0.329667	0.000470784	0.273167	130	36	57391.2	67.1
O43181	O43181	NDUFS4	Mitochondria	0.069	0.131	0.04	-0.063	-0.116	-0.093	0.344	0.274	0.362	-0.31	-0.278	-0.1415	0.335027	-0.170667	0.00319674	0.246667	0.000124118	-0.569833	18	8	20107.6	38.8
O43189	O43189	PHF1	General	-0.085	-0.056	-0.033	0.075	-0.135	0.038	0.292	0.335	0.328	-0.013	0	-0.0955	0.936563	0.0506667	0.000213741	0.376333	0.000240581	-0.3545	5	5	63416.9	8.8
O43196	O43196-3	MSH5	General	0.026	-0.05	0.055	-0.1	0.037	0.047	-0.021	-0.008	-0.162	0.009	-0.08	-0.0865	0.985852	-0.0156667	0.285087	-0.074	0.8708	0.0111667	6	6	95572.7	8.2
O43237	O43237	DYNC1LI2	General	0.071	0.022	0.062	0.034	0.021	0.025	-0.046	-0.081	-0.136	-0.042	-0.01	0.0405	0.922676	-0.025	0.0170542	-0.139333	0.100074	0.0838333	49	32	54383.6	69.9
O43242	O43242	PSMD3	General	-0.026	-0.041	-0.033	-0.023	0.008	0.015	0.084	0.066	0.015	0.036	0.021	0.0045	0.886515	0.0333333	0.0506904	0.0883333	0.395693	-0.0345	135	55	61090.6	76.7
O43248	O43248	HOXC11	General	-0.001	0.014	0.022	0.001	-0.043	0.032	-0.085	-0.006	0.108	-0.102	-0.037	0.0025	0.966475	-0.015	0.933073	-0.006	0.458694	-0.0511667	8	10	34203.5	34.8
O43251	O43251-8	RBFOX2	General	-0.013	0.072	0.009	-0.034	0.008	-0.049	0.107	0.045	-0.009	-0.047	0.033	-0.0535	0.886082	-0.0476667	0.650741	0.025	0.198527	-0.0701667	19	11	47342.4	30.5
O43252	O43252	PAPSS1	General	0.054	0.009	0.064	0.019	-0.029	0.029	-0.086	0.011	-0.039	-0.064	-0.077	-0.0595	0.901243	-0.036	0.110472	-0.0803333	0.513755	-0.0288333	54	41	71630.6	75.8
O43257	O43257	ZNHIT1	General	0.069	-0.052	-0.01	-0.004	-0.101	0.044	-0.04	-0.044	0	0.021	0.069	0.0945	0.972557	-0.0226667	0.553743	-0.0303333	0.0553421	0.0895	5	3	17992.1	14.9
O43264	O43264	ZW10	Endoplasmic Reticulum	0.04	0.005	-0.005	-0.007	-0.001	0.022	-0.015	-0.031	-0.061	0.012	0.034	0.0445	0.984023	-0.00866667	0.213806	-0.049	0.102279	0.0658333	61	43	89683.7	56.3
O43286	O43286	B4GALT5	General	-0.084	-0.18	-0.201	-0.061	0.157	-0.103	0.432	0.391	0.234	0.075	0.186	-0.0645	0.815969	0.152667	0.00107389	0.507333	0.0147889	-0.286833	7	4	45346	12.6
O43290	O43290	SART1	General	-0.035	0	0.024	-0.001	-0.095	-0.004	0.08	0.05	0.124	-0.141	-0.03	-0.0425	0.940308	-0.0296667	0.0679482	0.0883333	0.0152448	-0.155833	117	58	90424.4	64.5
O43292	O43292	GPAA1	ER membrane	-0.099	-0.019	0.03	0.054	0.098	0.005	0.05	-0.07	-0.179	0.07	0.083	0.0065	0.826544	0.0816667	0.668617	-0.037	0.12441	0.1195	15	10	67964.3	16.5
O43293	O43293	DAPK3	General	-0.002	0.003	0.026	0.03	-0.01	0.025	0.021	-0.02	0.026	-0.032	-0.004	-0.0005	0.988024	0.006	1	0	0.588328	-0.0211667	29	18	52705.9	35.6
O43295	O43295	SRGAP3	General	-0.112	-0.117	-0.166	-0.201	0.076	0.049	0.046	0.174	0.185	0.033	-0.058	-0.0165	0.886082	0.106333	0.0041695	0.266667	0.0312545	-0.148833	2	4	125472	3.1
O43298	O43298	ZBTB43	General	-0.035	0.007	-0.033	0.046	0.018	-0.023	-0.022	0.003	0.078	0.034	0.031	0.0075	0.906424	0.034	0.399874	0.04	0.926737	0.0045	13	10	53314.2	25.9
O43299	O43299	AP5Z1	General	-0.017	0.013	-0.031	0.016	0.033	0.061	-0.067	-0.09	-0.133	-0.041	0.027	-0.0455	0.85009	0.0483333	0.062995	-0.085	0.105526	0.0768333	20	16	89744.7	24.9
O43301	O43301	HSPA12A	General	-0.046	-0.096	-0.075	-0.001	0.047	-0.024	0.01	0.007	-0.069	0.09	0.056	0.0475	0.771806	0.0796667	0.230832	0.055	0.0832548	0.0818333	25	21	75262.2	33.7
O43303	O43303	CCP110	General	-0.098	0.015	0.086	0.08	-0.063	0.09	-0.103	-0.026	0.027	0.011	-0.087	-0.0375	0.959251	0.0346667	0.644945	-0.035	0.948428	-0.00383333	8	8	114221	8.9
O43304	O43304	SEC14L5	General	0.034	0.039	-0.004	-0.059	0.056	0.01	-0.148	-0.225	-0.469	0.116	0.045	-0.0055	0.959251	-0.0206667	0.0217277	-0.303667	0.0111059	0.3325	5	4	79739	5.7
O43306	O43306	ADCY6	General	-0.06	0.079	-0.08	-0.019	0.162	-0.012	-0.017	-0.051	-0.182	0.068	0.202	0.0365	0.920152	0.064	0.432234	-0.063	0.0327865	0.1855	9	9	132382	8.5
O43309	O43309	ZSCAN12	General	-0.015	-0.048	-0.018	0.047	-0.026	0.046	-0.201	-0.149	0.491	-0.058	0.013	0.0765	0.874744	0.0493333	0.757085	0.074	0.872687	-0.0365	6	14	71932.8	21.3
O43310	O43310-2	CTIF	General	0.076	0.008	-0.009	-0.019	-0.033	0.014	-0.035	-0.009	-0.12	0.052	0.05	-0.0345	0.903697	-0.0376667	0.161724	-0.0796667	0.163839	0.0771667	18	17	68352.4	35.8
O43312	O43312-5	MTSS1	General	-0.038	-0.076	-0.131	-0.073	-0.087	0.001	0.233	0.216	0.028	0.063	0.048	-0.0035	0.943258	0.0286667	0.0185796	0.240667	0.109743	-0.123167	4	3	83248.7	3.5
O43318	O43318	MAP3K7	General	0.036	-0.034	-0.034	0.01	-0.004	-0.029	0.041	0.027	-0.036	0.053	0.014	0.0405	0.997389	0.003	0.658627	0.0213333	0.559295	0.0251667	32	24	67936.6	47.8
O43324	O43324	EEF1E1	General	0.002	-0.036	-0.019	-0.011	-0.037	0.019	-0.024	0.044	-0.013	0.064	0.126	-0.0175	0.985852	0.008	0.629703	0.02	0.322565	0.0551667	36	16	19867.3	82.1
O43325	O43325	LYRM1	Mitochondria	0.056	0.027	-0.104	-0.046	-0.006	-0.064	0.242	0.219	0.29	0.001	-0.086	0.0705	0.948255	-0.0316667	0.0064459	0.257333	0.0030341	-0.255167	4	4	14395.5	40.9
O43353	O43353	RIPK2	General	0.031	-0.077	-0.042	-0.037	-0.059	-0.065	0.238	0.292	0.264	0.007	-0.072	0.0375	0.947382	-0.0243333	0.00138948	0.294	0.000951744	-0.273833	26	21	61764.4	51.1
O43379	O43379-4	WDR62	Endoplasmic Reticulum	0.019	-0.014	0	0.016	0.01	-0.003	-0.033	-0.005	-0.012	0.03	-0.011	-0.0435	0.9867	0.006	0.608642	-0.0183333	0.844581	0.0085	41	35	168676	28.6
O43390	O43390-2	HNRNPR	Endoplasmic Reticulum	-0.018	0.008	-0.065	-0.048	0.058	0.181	-0.084	-0.048	-0.051	0.129	0.092	0.0385	0.882873	0.0886667	0.38599	-0.036	0.00972056	0.1475	3	44	71227	58.4
O43390	O43390	HNRNPR	Endoplasmic Reticulum	-0.007	0.014	0.039	0.024	-0.081	0.041	-0.071	-0.042	0.105	-0.128	-0.013	-0.0295	0.966475	-0.0206667	0.793858	-0.018	0.43995	-0.0541667	149	44	71498.4	58.2
O43395	O43395	PRPF3	General	-0.029	-0.002	0.014	-0.032	-0.059	-0.009	0.171	0.177	0.276	-0.088	-0.015	-0.0315	0.920152	-0.0276667	0.00500411	0.213667	0.00182041	-0.252833	96	47	77698.7	67.2
O43396	O43396	TXNL1	General	-0.014	-0.081	-0.017	-0.008	-0.011	-0.002	0.019	0.044	0.039	-0.014	-0.028	0.0115	0.917454	0.0303333	0.102583	0.0713333	0.238937	-0.0441667	66	21	32650.1	79.9
O43399	O43399-7	TPD52L2	General	0.063	-0.063	0.008	0.022	-0.015	-0.066	-0.1	-0.016	-0.013	-0.011	-0.009	0.0455	0.966475	-0.0223333	0.431466	-0.0456667	0.276987	0.0515	49	21	24910.3	77.7
O43402	O43402	EMC8	Endoplasmic Reticulum	-0.038	0.002	-0.004	0.031	-0.073	-0.004	0.052	0.065	0.136	-0.092	-0.012	0.0105	0.997735	-0.002	0.0534507	0.0976667	0.0455067	-0.1155	27	13	24229	70.4
O43414	O43414	ERI3	General	0.076	-0.047	0.017	-0.021	0.029	-0.036	-0.062	-0.027	-0.081	0.007	0.037	0.0835	0.952379	-0.0246667	0.179809	-0.072	0.0418803	0.0991667	22	11	37751	38.8
O43422	O43422	THAP12	General	-0.035	0.012	-0.022	-0.04	-0.043	0.008	0.114	0.156	0.126	-0.013	-0.017	-0.0245	0.982205	-0.01	0.00743932	0.147	0.00417368	-0.150167	24	18	88843.5	33.6
O43427	O43427	FIBP	General	0.066	-0.007	-0.057	-0.041	0.052	-0.035	0.163	0.184	0.093	0.097	0.091	0.0205	0.988056	-0.00866667	0.0325795	0.146	0.130907	-0.0771667	25	19	42162.6	49.7
O43435	O43435-3	TB	General	-0.022	-0.046	-0.054	0.029	0.022	0.017	-0.139	-0.027	-0.061	0.071	-0.018	0.0555	0.77479	0.0633333	0.470764	-0.035	0.0566369	0.111833	12	10	52893.7	23.8
O43439	O43439-4	CBFA2T2	General	0.064	-0.038	-0.103	-0.071	0.015	0.05	-0.04	0.101	0.064	0.044	0.097	0.0095	0.972557	0.0236667	0.364905	0.0673333	0.890587	0.0085	7	6	68762.1	14
O43447	O43447	PPIH	Endoplasmic Reticulum	0.041	0.004	0.047	0.053	-0.023	0.021	-0.022	0.013	0.082	-0.067	-0.126	0.0155	0.972569	-0.0136667	0.901371	-0.00633333	0.168963	-0.0835	51	20	19493.1	93.2
O43462	O43462	MBTPS2	General	0.008	0.03	0.026	0.058	-0.034	0.001	-0.055	-0.035	-0.074	0.022	0.068	0.0685	0.972912	-0.013	0.0587497	-0.076	0.0216631	0.1075	8	5	58127.2	8
O43463	O43463	SUV39H1	General	0.034	-0.038	-0.031	-0.07	-0.089	-0.046	0.145	0.177	0.301	-0.058	-0.023	0.0415	0.83313	-0.0566667	0.0112163	0.219333	0.00791399	-0.220833	20	15	49104.8	36.8
O43464	O43464-4	HTRA2	Mitochondria	-0.059	0.113	-0.379	-0.053	0.066	0.075	-0.384	-0.72	-0.384	0.373	0.1	0.1735	0.902704	0.137667	0.0681326	-0.387667	0.00127792	0.7115	2	10	48897	36.3
O43464	O43464	HTRA2	Mitochondria	-0.072	0.04	-0.015	0.045	0.044	0.025	-0.062	0.015	-0.046	-0.021	-0.035	-0.0305	0.880682	0.0536667	0.778954	-0.0153333	0.960221	0.00216667	17	14	40141.4	35.5
O43474	O43474	KLF4	General	-0.135	0.041	0.06	0.176	0.088	0.019	-0.344	-0.368	-0.337	0.069	0.166	0.1215	0.866206	0.105667	0.00363844	-0.338333	5.37e-05	0.4685	5	8	55468.3	20
O43482	O43482	OIP5	General	-0.014	-0.082	0.072	-0.041	-0.02	-0.155	0.2	0.395	0.245	-0.004	-0.093	-0.0765	0.900608	-0.064	0.0109258	0.288	0.00197902	-0.337833	5	5	25204.5	20
O43488	O43488	AKR7A2	Mitochondria	0.1	-0.016	-0.002	0.061	0.034	-0.002	-0.147	-0.066	-0.168	0.026	0.004	0.0565	0.997735	0.00366667	0.0311118	-0.154333	0.0107072	0.155833	30	16	40044.7	55.7
O43491	O43491	EPB41L2	General	0.016	0.067	0.008	-0.052	-0.049	-0.089	0.127	0.154	0.149	-0.111	-0.068	-0.0725	0.637757	-0.0936667	0.0209854	0.113	0.000728105	-0.227167	106	60	113100	64.3
O43493	O43493	TGOLN2	General	-0.032	-0.042	-0.094	-0.032	0.047	-0.121	0.325	0.23	-0.002	0.083	0.109	0.0515	0.972569	0.0206667	0.050294	0.240333	0.296518	-0.103167	31	19	51111.9	38.3
O43502	O43502	RAD51C	General	0.017	-0.048	-0.122	-0.052	-0.035	-0.022	0.105	0.054	0.112	0.074	0.043	-0.0525	0.977806	0.0146667	0.0345961	0.141333	0.19925	-0.0688333	12	10	42759.4	33.7
O43504	O43504	LAMTOR5	General	0.018	0.018	0.1	0.017	-0.068	-0.089	-0.071	0.006	-0.067	-0.194	-0.04	-0.0275	0.805167	-0.092	0.0999817	-0.0893333	0.51155	-0.0431667	15	5	9784.9	95.6
O43505	O43505	B4GAT1	General	-0.003	-0.038	0.001	-0.06	-0.036	-0.013	0.314	0.206	0.178	-0.016	-0.064	0.0435	0.940308	-0.023	0.00441343	0.246	0.00405313	-0.244833	7	6	47574.6	27.2
O43513	O43513	MED7	General	-0.018	-0.069	-0.007	-0.014	0.027	-0.002	0.021	0.069	0.151	-0.108	-0.034	-0.1455	0.901243	0.035	0.0674559	0.111667	0.0149711	-0.176167	17	11	27473	64.3
O43516	O43516-3	WIPF1	General	-0.011	0.004	0.057	0.083	0.049	0.074	-0.176	-0.157	-0.187	-0.001	-0.016	0.0455	0.849889	0.052	0.00345894	-0.19	0.00243548	0.182833	18	12	52036.4	39.2
O43521	O43521-12	BCL2L11	Mitochondria	-0.124	-0.089	-0.087	0.023	-0.006	-0.03	0.259	0.213	0.201	0.031	0.088	0.0365	0.614873	0.0956667	0.000389373	0.324333	0.00407332	-0.1725	2	2	22876.7	12.6
O43524	O43524	FOXO3	General	-0.078	-0.028	0.042	0.023	-0.049	-0.015	0.114	0.174	0.248	-0.107	-0.086	-0.0355	0.989153	0.00766667	0.0151272	0.2	0.00218511	-0.254833	9	7	71560.7	17.9
O43542	O43542	XRCC3	General	-0.035	-0.08	-0.017	-0.068	-0.006	0.009	0.066	0.163	0.056	0.056	0.001	0.0305	0.94848	0.0223333	0.0278986	0.139	0.192018	-0.0658333	13	8	38305.5	26.8
O43543	O43543	XRCC2	General	-0.01	0.014	-0.103	-0.091	0.05	0.01	0.16	0.14	0.079	0.06	-0.014	-0.1305	0.972557	0.0226667	0.0214405	0.159333	0.0403008	-0.1545	3	3	32640.6	12.5
O43567	O43567	RNF13	ER membrane	-0.174	0.069	-0.069	0.065	-0.006	-0.1	0.11	0.113	0.133	-0.092	-0.095	-0.1455	0.952379	0.0443333	0.0527007	0.176667	0.000791315	-0.2295	7	7	43383.4	15.4
O43572	O43572	AKAP10	Mitochondria	-0.045	-0.006	0.029	0.03	-0.005	0.033	-0.01	0.01	-0.018	0.009	-0.055	0.0025	0.937011	0.0266667	0.975705	0.00133333	0.842803	-0.0085	14	13	74273.3	23.4
O43583	O43583	DENR	General	0.033	-0.062	0.015	0.022	-0.004	-0.004	-0.017	-0.004	-0.004	-0.015	-0.064	-0.0165	0.985852	0.00933333	0.939138	-0.00366667	0.541616	-0.0235	27	9	22491	53.5
O43592	O43592	XPOT	General	0.002	-0.085	-0.161	-0.112	0.008	-0.021	0.16	0.159	-0.042	0.148	0.085	0.0255	0.943258	0.0396667	0.0808289	0.173667	0.9422	-0.00616667	82	36	111217	46.6
O43593	O43593	HR	General	-0.041	0.063	0.035	0.062	-0.136	0.044	-0.198	0.203	0.202	-0.028	-0.11	-0.0315	0.968167	-0.029	0.737806	0.05	0.341444	-0.1255	5	5	130060	5.8
O43598	O43598	DNPH1	General	0.025	0.077	0.147	0.07	0.092	-0.019	-0.137	-0.063	-0.087	-0.027	-0.116	-0.0855	0.940308	-0.0353333	0.0129991	-0.178667	0.68818	0.0195	27	13	19222.2	66.6
O43615	O43615	TIMM44	Mitochondria	-0.033	0.012	-0.142	-0.055	0.026	-0.133	0.272	0.2	0.245	0.036	0.021	0.0115	0.998766	0.000333333	0.00333231	0.293333	0.0012382	-0.216167	67	31	51697.1	59.2
O43617	O43617	TRAPPC3	Endoplasmic Reticulum	0.093	-0.112	-0.146	-0.087	-0.004	-0.117	0.123	0.187	0.097	0.084	-0.025	-0.0225	0.98803	-0.0143333	0.0561265	0.190667	0.0438007	-0.1235	17	12	20444.9	53.8
O43623	O43623	SNAI2	General	0.112	0.332	-0.19	0.106	-0.124	-0.029	-0.286	-0.478	-0.388	0.41	0.067	-0.0545	0.943258	-0.100333	0.0248297	-0.468667	0.0069283	0.524833	2	4	30784.3	13
O43633	O43633	CHMP2A	General	0.036	-0.034	0.02	0.037	0.011	0.064	-0.019	-0.085	-0.095	0.039	-0.013	0.0295	0.921259	0.03	0.1324	-0.0736667	0.0739954	0.0848333	46	20	25103.6	50.9
O43639	O43639	NCK2	Endoplasmic Reticulum	0.078	0.012	0.059	0.091	0.029	0.046	-0.121	-0.074	-0.105	-0.058	-0.068	0.0205	0.989839	0.00566667	0.0092243	-0.149667	0.164777	0.0648333	6	4	43142.5	8.4
O43657	O43657	TSPAN6	General	-0.133	0.039	-0.033	0.046	-0.044	-0.019	0.106	0.123	0.017	-0.074	-0.015	-0.0535	0.944801	0.0366667	0.098534	0.124333	0.0255714	-0.1295	7	6	28190.4	22.4
O43660	O43660	PLRG1	General	-0.011	0.018	0.014	0.012	-0.084	-0.01	-0.068	-0.014	0.078	0.005	-0.019	0.0255	0.920152	-0.0343333	0.888895	-0.00833333	0.929621	0.00516667	34	27	57535.1	56.2
O43660	O43660-2	PLRG1	General	0.06	-0.142	-0.111	0.055	-0.056	-0.002	-0.146	0.103	0.134	-0.095	-0.101	0.1255	0.91589	0.0633333	0.418059	0.0946667	0.643625	-0.0538333	2	27	56631.2	55.4
O43663	O43663	PRC1	General	-0.047	-0.072	-0.046	-0.009	-0.016	-0.023	0.2	0.277	0.252	-0.041	-0.021	-0.0275	0.874687	0.039	0.000635482	0.298	0.000459548	-0.272833	67	42	61957.7	70.4
O43663	O43663-3	PRC1	General	-0.049	-0.053	-0.062	0.029	-0.092	0.007	0.045	0.174	0.242	-0.045	-0.019	-0.1395	0.921622	0.036	0.0173813	0.208333	0.0144724	-0.2215	2	34	72290	61.7
O43665	O43665-3	RGS10	General	0.111	-0.028	0.032	0.034	-0.003	0.029	-0.045	-0.052	-0.104	-0.02	-0.062	-0.0125	0.972557	-0.0183333	0.086641	-0.105333	0.391453	0.0355	15	11	21266.6	53
O43670	O43670-2	ZNF207	General	0.029	0.016	-0.041	-0.013	-0.014	0.077	-0.089	-0.086	-0.067	0.03	0.075	0.0575	0.972912	0.0153333	0.0679509	-0.082	0.00721044	0.134833	42	19	50034	29.8
O43674	O43674	NDUFB5	Mitochondria	-0.08	0.096	-0.037	0.048	0.195	0.001	0.001	-0.057	-0.124	0.042	-0.056	-0.0065	0.886515	0.0883333	0.473084	-0.053	0.335637	0.0531667	18	7	21749.9	33.3
O43676	O43676	NDUFB3	Mitochondria	-0.029	0.118	-0.081	0.025	0.133	-0.003	0.026	-0.131	-0.101	0.022	-0.006	-0.0365	0.940308	0.049	0.405338	-0.0713333	0.296518	0.0618333	12	5	11401.8	43.8
O43677	O43677	NDUFC1	Mitochondria	-0.103	-0.2	-0.489	-0.253	0.036	-0.013	0.452	0.112	-0.067	0.279	0.318	0.0845	0.869992	0.187333	0.0572788	0.429667	0.712313	0.0615	2	2	8734.1	32.8
O43678	O43678	NDUFA2	Mitochondria	-0.006	0.133	0.151	-0.039	-0.021	-0.186	0.259	0.122	0.168	-0.193	-0.204	-0.1235	0.693269	-0.174667	0.229862	0.0903333	0.000578401	-0.3565	12	6	11035.5	55.5
O43681	O43681	ASNA1	Endoplasmic Reticulum	0.103	-0.03	-0.013	-0.033	0.006	-0.01	-0.081	0.027	-0.06	0.008	0.044	0.0145	0.940308	-0.0323333	0.366844	-0.058	0.213712	0.0601667	40	17	39248.5	60.6
O43683	O43683	BUB1	General	-0.041	-0.044	0.008	-0.02	-0.045	-0.053	0.464	0.529	0.536	-0.028	-0.097	-0.0315	0.967782	-0.0136667	8.59e-05	0.535333	2.89e-05	-0.561833	56	38	123514	42.5
O43684	O43684	BUB3	General	0.028	-0.017	-0.032	0	-0.015	-0.036	-0.019	-0.003	0.025	0.001	0.003	0.0395	0.981872	-0.01	0.849018	0.008	0.735878	0.0135	66	22	37610.5	63.4
O43688	O43688-2	PLPP2	ER membrane	-0.15	-0.067	-0.164	-0.1	0.124	-0.128	0.721	0.725	0.249	0.092	0.089	-0.0435	0.886515	0.0923333	0.00591891	0.692	0.0104828	-0.519167	4	4	34905.4	11
O43707	O43707	ACTN4	General	0.031	0.023	0.018	0.064	0.019	0.05	-0.124	-0.105	-0.088	0.01	-0.004	0.0485	0.940308	0.0203333	0.00844156	-0.129667	0.0121403	0.123833	358	95	105309	85.1
O43709	O43709	BUD23	General	0.009	-0.023	0.051	-0.023	-0.063	0.001	0.179	0.071	0.101	-0.115	-0.047	-0.0955	0.891276	-0.0406667	0.0686822	0.104667	0.00417042	-0.202833	21	13	32222.1	47.6
O43711	O43711	TLX3	General	0.068	-0.014	-0.011	-0.012	-0.099	-0.039	0.193	0.139	0.195	-0.147	-0.008	-0.0405	0.851781	-0.0643333	0.0113902	0.161333	0.00309269	-0.240833	10	9	31980.7	40.2
O43715	O43715	TRIAP1	Mitochondria	0.022	0.086	0.077	0.087	-0.054	0.054	-0.121	-0.123	-0.103	-0.089	0.002	0.0295	0.943258	-0.0326667	0.0041695	-0.177333	0.0681142	0.0965	17	9	9014	81.5
O43716	O43716	GATC	Mitochondria	-0.032	0.084	-0.044	0.012	-0.043	-0.094	0.18	0.13	0.213	-0.017	-0.064	-0.0755	0.921622	-0.0443333	0.0206158	0.171667	0.00157704	-0.2265	10	7	15199.9	64.7
O43719	O43719	HTATSF1	General	0.02	0.033	0.025	0.008	-0.027	0.011	-0.017	-0.043	-0.054	-0.021	0.033	0.0125	0.906424	-0.0286667	0.0925411	-0.064	0.242945	0.0461667	117	60	86421.8	69.1
O43734	O43734	TRAF3IP2	General	-0.004	-0.034	0.013	-0.003	0.032	0.025	-0.1	-0.038	-0.092	0.086	-0.015	-0.0225	0.921259	0.0263333	0.117448	-0.0683333	0.0887403	0.0928333	19	14	65121.4	33.6
O43741	O43741	PRKAB2	General	0.081	0.032	0.096	0.026	0.032	0.011	-0.178	-0.078	-0.254	-0.05	-0.01	-0.0375	0.864163	-0.0466667	0.0087444	-0.239667	0.0423636	0.1375	11	12	30415.8	56.2
O43747	O43747-2	AP1G1	General	0.025	-0.082	-0.09	-0.042	0.015	0.019	0.026	-0.011	-0.121	0.115	0.15	0.0295	0.902704	0.0463333	0.847663	0.0136667	0.0566579	0.1335	107	47	92577.1	55
O43752	O43752	STX6	ER tail-anchored	-0.023	0.004	0.008	-0.013	0.009	0.02	-0.058	0.025	0.001	-0.062	-0.064	-0.0585	0.982205	0.009	0.877663	-0.007	0.229365	-0.0508333	20	14	29232.5	72.9
O43760	O43760-2	SYNGR2	General	-0.079	-0.008	-0.094	-0.041	-0.001	-0.068	0.191	0.18	0.03	0.108	-0.037	-0.1595	0.948255	0.0236667	0.0228894	0.194	0.100491	-0.163167	9	6	30944.9	16.7
O43765	O43765	SGTA	General	0	-0.059	0.005	0	-0.061	-0.021	0.044	0.082	0.065	-0.071	-0.068	-0.0045	0.985852	-0.00933333	0.0707492	0.0816667	0.0238005	-0.1115	44	17	34290.7	43.4
O43766	O43766	LIAS	Mitochondria	-0.017	0.075	0.023	-0.026	-0.043	-0.068	0.286	0.231	0.348	-0.072	-0.114	-0.1565	0.805167	-0.0726667	0.00343061	0.261333	0.000232458	-0.4025	10	9	42480.9	26.6
O43768	O43768-7	ENSA	General	-0.204	0.288	0.282	0.248	-0.054	-0.016	-0.053	-0.207	0.065	-0.003	-0.209	-0.0535	0.972912	-0.0626667	0.326196	-0.187	0.824522	-0.0235	2	12	14880.7	70.6
O43772	O43772	SLC25A20	Mitochondria	-0.106	-0.124	-0.735	-0.345	0.169	-0.152	0.279	0.122	0.004	0.502	0.176	0.0145	0.91589	0.212333	0.073129	0.456667	0.546416	0.0958333	13	10	33285.4	44.8
O43776	O43776	NARS	General	0.033	0.018	0.008	0.015	0.008	0.016	-0.087	-0.036	-0.053	0.008	-0.003	0.0355	0.985852	-0.00666667	0.060852	-0.0783333	0.084143	0.0721667	116	44	63797.6	57.8
O43791	O43791	SPOP	General	-0.018	-0.017	-0.015	-0.033	-0.047	0.007	0.049	0.112	0.17	-0.008	0.025	-0.0275	0.985852	-0.00766667	0.0309338	0.127	0.0427281	-0.113833	15	9	42873.4	29.1
O43795	O43795	MYO1B	General	-0.031	0.031	0.001	-0.064	-0.035	-0.099	0.305	0.294	0.282	-0.028	0.04	-0.0275	0.814575	-0.0663333	0.000504082	0.293333	0.000306648	-0.298833	94	52	133010	45.8
O43805	O43805	SSNA1	General	0.18	0.049	0.098	0.061	0.016	0.061	-0.168	-0.118	-0.204	0.025	-0.041	0.0535	0.873539	-0.063	0.00342089	-0.272333	0.00755654	0.175833	26	11	13767.1	78.9
O43808	O43808	SLC25A17	General	-0.178	0.099	-0.06	-0.123	0.041	0.008	0.22	0.066	-0.191	0.059	0.268	-0.0555	0.985852	0.0216667	0.612027	0.078	0.698489	0.0588333	13	8	34680.3	29.3
O43809	O43809	NUDT21	General	0.041	-0.018	-0.059	-0.032	-0.01	0.023	-0.131	-0.131	-0.025	0.094	0.123	0.1085	0.991219	0.00566667	0.161838	-0.0836667	0.00366249	0.204167	55	24	26283.8	93.8
O43813	O43813	LANCL1	General	0.142	0.049	0	0.074	0.053	0.102	-0.215	-0.241	-0.331	0.058	0.047	0.0635	0.985852	0.0126667	0.00273048	-0.326	0.000461913	0.3185	38	21	46024	52.6
O43815	O43815	STRN	General	0.044	0.032	0.076	0.082	-0.006	0.023	-0.113	-0.112	-0.077	-0.03	0.009	0.0085	0.965914	-0.0176667	0.0063853	-0.151333	0.0306479	0.0965	54	33	86587	55.8
O43818	O43818	RRP9	General	-0.04	-0.029	-0.019	-0.029	-0.151	-0.015	0.061	0.16	0.314	-0.065	-0.043	-0.0055	0.937011	-0.0356667	0.0351853	0.207667	0.0218854	-0.216167	42	27	52467.3	53.2
O43819	O43819	SCO2	Mitochondria	-0.13	0.075	-0.046	0.031	0.143	-0.059	0.048	-0.067	-0.09	0.07	-0.043	0.0875	0.917011	0.072	0.975999	-0.00266667	0.258237	0.0745	24	14	29980.6	53.7
O43823	O43823	AKAP8	General	-0.062	-0.002	0.052	0.016	-0.054	0.024	0.056	0.067	0.145	-0.115	-0.037	-0.0505	0.998591	-0.000666667	0.113745	0.0933333	0.0117827	-0.156833	66	36	76677.5	51.3
O43829	O43829	ZBTB14	General	-0.016	-0.058	-0.015	-0.052	-0.115	0.044	-0.022	0.053	0.012	0.019	0.009	-0.0535	0.9867	-0.0113333	0.303063	0.044	0.623096	-0.0228333	12	11	51925.3	25.1
O43852	O43852-4	CALU	Endoplasmic Reticulum	-0.131	0.017	-0.008	-0.003	0.015	-0.012	-0.037	0.142	0.103	-0.261	-0.21	-0.0635	0.922718	0.0406667	0.184932	0.11	0.0155428	-0.2475	6	30	38164.4	67.1
O43852	O43852-3	CALU	Endoplasmic Reticulum	-0.059	-0.053	-0.007	0.051	-0.068	0.044	0.039	0.099	0.172	-0.088	-0.021	-0.0175	0.900478	0.0486667	0.0295833	0.143	0.0241171	-0.1455	108	31	38192.3	72.1
O43854	O43854	EDIL3	General	0.04	0.017	0.233	0.124	-0.07	0.046	-0.086	-0.013	0.132	-0.084	0.016	-0.0325	0.937011	-0.0633333	0.402473	-0.0856667	0.554171	-0.0445	2	2	55133.2	6
O43861	O43861	ATP9B	General	-0.082	0.065	0.019	-0.012	0.023	0.016	-0.155	-0.059	-0.233	0.035	0.154	0.0075	0.988169	0.00833333	0.0743203	-0.149667	0.015761	0.2145	8	5	130842	4.3
O43865	O43865	AHCYL1	Endoplasmic Reticulum	0.141	0.022	0.039	0.04	0.031	0.027	-0.218	-0.196	-0.255	0.085	0.106	0.0935	0.926588	-0.0346667	0.00203189	-0.290333	0.000170892	0.317833	107	44	60034.4	62.6
O43896	O43896	KIF1C	Endoplasmic Reticulum	0	0.035	0.067	0.017	-0.006	-0.049	-0.025	-0.023	-0.008	-0.059	-0.017	-0.0345	0.885527	-0.0466667	0.189879	-0.0526667	0.630164	-0.0181667	63	50	123800	48.6
O43900	O43900	PRICKLE3	General	0.006	-0.043	0.008	-0.028	-0.169	-0.002	0.095	0.16	0.237	-0.173	-0.081	-0.0495	0.902192	-0.0566667	0.0168194	0.173667	0.00346732	-0.265167	8	7	70833	14.3
O43909	O43909	EXTL3	ER membrane	-0.056	0	-0.039	-0.036	0.047	-0.005	0.157	0.312	0.227	-0.096	-0.01	-0.0405	0.920152	0.0336667	0.00436129	0.263667	0.00215407	-0.280833	4	4	105774	5.9
O43913	O43913	ORC5	General	-0.002	-0.07	-0.101	-0.067	0	-0.015	0.105	0.079	-0.016	0.054	0.142	0.0015	0.940308	0.0303333	0.0776506	0.113667	0.882136	0.00983333	32	16	50795.6	37.4
O43920	O43920	NDUFS5	Mitochondria	0.047	0.107	0.007	0.058	-0.075	-0.02	0.049	0.022	-0.022	-0.084	-0.101	-0.0375	0.885527	-0.066	0.450274	-0.0373333	0.058956	-0.0905	17	8	12745.5	60.3
O43924	O43924	PDE6D	General	0.134	-0.071	-0.131	-0.013	0.046	-0.008	-0.087	-0.012	-0.175	0.084	0.008	0.0745	0.972557	0.031	0.498336	-0.0686667	0.0343972	0.146833	5	4	17533.8	33.3
O43929	O43929	ORC4	General	0.006	-0.032	-0.078	-0.031	-0.022	-0.02	0.143	0.117	-0.025	0.072	0.111	-0.0085	0.982579	0.0103333	0.117046	0.113	0.776574	-0.0201667	24	18	50775.8	51.8
O43933	O43933	PE	General	0.022	-0.03	-0.047	-0.023	0.001	-0.009	0.004	-0.014	-0.009	0.04	0.037	0.0075	0.985852	0.008	0.770117	0.012	0.343708	0.0345	48	36	143891	29.7
O43934	O43934	MFSD11	General	-0.013	0.048	-0.384	-0.163	0.245	-0.021	-0.041	-0.101	-0.45	0.403	0.289	0.0795	0.921622	0.136667	0.682034	-0.081	0.0157185	0.4545	2	2	49600.5	3.1
O60216	O60216	RAD21	General	-0.024	0.012	0.035	-0.015	-0.02	-0.02	0.036	0.05	0.052	-0.087	0.015	-0.0515	0.921622	-0.026	0.313017	0.0383333	0.0727404	-0.0871667	76	38	71973.5	56.2
O60218	O60218	AKR1B10	Mitochondria	-0.124	-0.168	0.084	-0.085	-0.018	-0.269	1.771	1.846	1.661	-0.099	-0.089	0.1365	0.952379	-0.0546667	2.77e-05	1.82867	5.03e-06	-1.7765	2	2	36247.1	5.3
O60220	O60220	TIMM8A	Mitochondria	-0.07	0.006	0.004	0.052	-0.013	0.043	-0.052	-0.058	0.014	-0.116	0.003	-0.0455	0.886083	0.0473333	0.809573	-0.012	0.698907	-0.0208333	24	9	11226.4	94.8
O60231	O60231	DH6	General	-0.016	-0.027	-0.016	0.001	-0.039	0.01	0.088	0.115	0.049	-0.016	-0.008	-0.0475	0.975527	0.0103333	0.0275894	0.103667	0.025055	-0.107833	84	50	119946	49.3
O60232	O60232	SSSCA1	General	-0.032	-0.059	0.01	0.002	-0.052	-0.018	0.117	0.144	0.186	-0.043	-0.068	-0.0415	0.994172	0.00433333	0.00652736	0.176	0.00174825	-0.199833	31	13	21930.4	78.3
O60239	O60239	SH3BP5	General	0.097	0.067	0.067	0.099	0.024	0.051	-0.205	-0.308	-0.264	-0.011	0.07	0.0565	0.952379	-0.019	0.000615936	-0.336	0.000779414	0.2975	30	21	50709.4	39.7
O60244	O60244	MED14	General	-0.015	-0.079	-0.074	-0.105	-0.041	-0.001	0.161	0.144	0.134	0.061	0.07	-0.0205	0.989839	0.007	0.00262494	0.202333	0.0331085	-0.1095	56	38	162087	30.3
O60245	O60245-2	PCDH7	General	-0.198	0.052	-0.021	-0.01	0.022	-0.099	0.195	0.178	0.297	-0.03	-0.017	-0.0565	0.975883	0.0266667	0.0176451	0.279	0.00150432	-0.257833	37	30	116998	30.9
O60256	O60256	PRPSAP2	General	0.033	-0.005	0.005	0.026	0.019	0.013	-0.034	-0.051	-0.069	0.056	0.017	0.0105	0.982599	0.00833333	0.109771	-0.0623333	0.0605333	0.0791667	37	22	41324.4	60.7
O60264	O60264	SMARCA5	General	-0.02	0.006	-0.003	-0.017	-0.077	0.018	0.042	0.033	0.126	-0.096	0.037	-0.0025	0.953922	-0.0196667	0.130174	0.0726667	0.143695	-0.0875	204	91	122588	68.5
O60266	O60266-2	ADCY3	General	-0.059	0.087	-0.026	-0.056	0.062	-0.149	0.19	0.334	0.221	-0.152	-0.038	-0.1645	0.943258	-0.0483333	0.0113408	0.247667	0.0010003	-0.3665	8	8	82743.5	16.6
O60268	O60268	KIAA0513	General	0.035	0.084	-0.001	0.107	0.009	0.048	-0.365	-0.219	-0.047	0.083	0.034	0.0805	0.972912	0.0153333	0.0396765	-0.249667	0.0165684	0.276167	3	3	47094.2	8.2
O60271	O60271	SPAG9	General	-0.001	-0.024	0.029	0.039	0.002	0.006	-0.02	-0.008	-0.023	-0.027	-0.008	-0.0175	0.966475	0.0143333	0.622546	-0.0183333	0.990022	-0.0005	135	79	147002	65
O60281	O60281	ZNF292	General	-0.022	-0.055	-0.085	0.089	0.019	-0.014	0.156	0.184	0.035	-0.112	0.057	0.0025	0.805167	0.0853333	0.0195014	0.179	0.0690961	-0.1425	3	3	309717	1.3
O60282	O60282	KIF5C	General	0.108	-0.037	-0.075	0.077	0.035	0.117	-0.148	-0.112	-0.005	-0.012	-0.033	0.0675	0.885527	0.0776667	0.279486	-0.087	0.128429	0.0958333	4	23	110064	21.7
O60284	O60284	ST18	General	-0.141	-0.024	-0.101	0.006	0.009	0.067	-0.096	-0.002	-0.021	0.058	0.266	-0.0855	0.684147	0.116	0.388826	0.049	0.260445	0.119167	3	3	116922	3.3
O60287	O60287	URB1	General	-0.015	0.011	-0.055	-0.076	-0.018	0.009	0.12	0.091	0.048	0.029	0.088	-0.0395	0.9867	-0.00866667	0.0401907	0.106	0.255457	-0.0605	117	80	256667	46.7
O60291	O60291-2	MGRN1	Endoplasmic Reticulum	-0.066	-0.003	-0.008	-0.018	0.051	-0.017	-0.079	0.017	0.047	0.031	-0.004	0.0055	0.926588	0.031	0.715524	0.0206667	0.763031	0.0158333	10	9	63873.2	24.8
O60292	O60292	SIPA1L3	General	-0.014	-0.033	-0.009	-0.039	-0.029	-0.072	0.056	0.087	0.145	-0.005	-0.022	-0.0215	0.91589	-0.028	0.0288239	0.114667	0.026117	-0.112167	19	19	195919	13
O60293	O60293	ZFC3H1	General	0.007	0.019	0.008	-0.029	-0.072	0.019	0.034	0.006	0.034	-0.079	-0.03	-0.0715	0.895935	-0.0386667	0.706524	0.0133333	0.0486465	-0.0848333	101	79	228291	42.6
O60294	O60294	LCMT2	General	0.021	-0.028	-0.03	-0.135	-0.003	0.001	-0.011	0.008	-0.036	0.08	-0.036	0.0555	0.943258	-0.0333333	0.987883	-0.000666667	0.349393	0.0461667	16	12	76513.3	22.5
O60303	O60303	KIAA0556	General	-0.176	0.045	0.035	0.119	0.013	-0.006	-0.029	-0.132	0.102	-0.034	0.026	-0.0875	0.911368	0.074	0.915647	0.0123333	0.884687	-0.0121667	8	6	182055	5.1
O60306	O60306	AQR	General	-0.034	-0.029	-0.025	-0.059	-0.007	-0.002	0.184	0.129	0.103	-0.012	0.036	-0.0465	0.9867	0.00666667	0.00602601	0.168	0.0132615	-0.146167	141	80	172376	57.9
O60307	O60307	MAST3	General	0.062	0.049	-0.032	0.021	0.081	0.147	-0.186	-0.168	-0.232	0.081	0.063	0.0585	0.886515	0.0566667	0.00404954	-0.221667	0.000459548	0.262833	9	8	143934	6.4
O60308	O60308	CEP104	General	0.057	0.042	-0.014	-0.034	-0.051	-0.01	0.106	0.082	0.06	-0.058	-0.083	0.0135	0.82075	-0.06	0.208423	0.0543333	0.0220956	-0.125167	6	6	105587	7.7
O60313	O60313-2	OPA1	Mitochondria	-0.017	0.046	-0.002	-0.026	0.057	0.007	-0.017	-0.084	-0.176	0.004	0.046	0.0765	0.997353	0.00366667	0.117781	-0.101333	0.0424674	0.1345	116	64	116453	59.8
O60318	O60318	MCM3AP	General	0.005	0.018	0.01	0.006	-0.023	0.075	-0.08	-0.047	-0.011	0.038	0.059	0.0045	0.9867	0.00833333	0.160714	-0.057	0.0787338	0.0798333	70	56	220797	37.7
O60330	O60330	PCDHGA12	General	-0.041	-0.033	0.047	0.089	0.009	-0.152	0.248	0.141	0.13	-0.01	0.013	0.0395	0.994172	-0.009	0.0163907	0.182	0.013442	-0.158833	5	4	101353	5.4
O60331	O60331-3	PIP5K1C	General	-0.019	-0.082	-0.132	-0.06	-0.022	-0.1	0.332	0.363	0.254	0.064	0.04	-0.0505	0.972569	0.017	0.000815213	0.394	0.00130102	-0.2985	10	11	77824.9	17.8
O60333	O60333-2	KIF1B	General	0.039	-0.003	0.033	0.04	0.007	0.023	-0.092	-0.034	-0.053	-0.032	-0.05	-0.0045	0.998591	0.000333333	0.0633978	-0.0826667	0.442877	0.0308333	82	60	200628	35.3
O60333	O60333-3	KIF1B	General	-0.023	-0.011	0.02	0.029	-0.008	-0.006	-0.006	0.006	0.035	-0.06	-0.032	-0.0655	0.979828	0.00966667	0.66936	0.0163333	0.108113	-0.0641667	18	48	131388	43.7
O60336	O60336	MAPKBP1	General	0.009	-0.007	-0.051	-0.051	0.098	0.075	-0.071	-0.009	-0.131	0.062	0.009	0.0305	0.891276	0.057	0.305804	-0.054	0.0583843	0.104167	4	4	165641	2.6
O60337	O60337	MARCHF6	ER membrane	-0.072	-0.015	-0.024	0.044	0.027	-0.007	0.135	-0.017	-0.011	0.042	0.105	-0.0055	0.82075	0.0583333	0.260385	0.0726667	0.869085	0.0115	13	10	103856	9.6
O60341	O60341	KDM1A	General	-0.005	0.008	0.01	-0.029	-0.038	-0.011	0.009	0.051	0.031	-0.035	0.021	-0.0375	0.895935	-0.0303333	0.465125	0.026	0.247931	-0.0475	90	41	93414.4	55.6
O60343	O60343-2	TBC1D4	General	0.029	0.006	0.04	0.03	0.009	-0.003	-0.043	-0.019	-0.059	-0.046	-0.053	-0.0105	0.966475	-0.013	0.0977654	-0.0653333	0.926437	0.00383333	73	51	141151	43.2
O60344	O60344-4	ECE2	General	-0.137	0.018	0.009	-0.029	0.008	-0.079	0.293	0.422	0.404	0.018	-0.078	-0.1005	0.997735	0.00333333	0.00188266	0.409667	0.000373637	-0.4265	13	8	28476.5	42.3
O60344	O60344	ECE2	General	0.07	-0.179	-0.195	-0.157	0	-0.075	0.202	0.092	0.15	0.086	-0.028	0.0455	0.985852	0.024	0.0354774	0.249333	0.0614806	-0.1135	4	7	100570	9
O60346	O60346	PHLPP1	General	-0.058	-0.056	-0.044	0.022	0.015	0.003	-0.016	-0.014	0.07	0.001	0	0.0245	0.737363	0.066	0.153261	0.066	0.91994	-0.00483333	20	17	187065	12.5
O60347	O60347	TBC1D12	General	0.057	0.025	0.085	0.049	-0.01	0.081	-0.037	-0.109	-0.18	0.002	-0.039	0.0075	0.972557	-0.0156667	0.0209517	-0.164333	0.0856708	0.0988333	7	6	86422.8	6.9
O60353	O60353	FZD6	ER membrane	-0.039	0.076	0.038	0.087	0.121	0.012	-0.338	-0.462	-0.454	0.026	0.083	0.0665	0.907302	0.0483333	0.000723968	-0.443	0.000119254	0.4765	19	16	81002.2	19.1
O60356	O60356-2	NUPR1	General	0.027	0.035	-0.195	0.279	0.201	0.271	-0.771	-0.755	-0.497	0.334	0.07	-0.0135	0.400836	0.294667	0.00261465	-0.63	0.000702727	0.8045	2	2	10690.9	22
O60381	O60381-3	HBP1	General	0.43	0.056	-0.295	-0.075	0.309	0.532	-0.441	-0.4	-0.219	0.387	-0.091	0.3655	0.936563	0.191667	0.0932476	-0.417	0.00790141	0.573833	2	2	58668.4	5
O60423	O60423-1	ATP8B3	ER membrane	-0.136	0.098	0.086	-0.069	0.061	-0.224	0.269	0.216	-0.004	-0.068	-0.092	-0.1275	0.920152	-0.0933333	0.241844	0.144333	0.0165371	-0.256167	3	3	149626	1.9
O60437	O60437	PPL	General	0.064	0.082	0.089	0.105	0.021	0.106	-0.474	-0.53	-0.501	-0.058	0.06	-0.0175	0.99832	-0.001	3.94e-05	-0.58	6.96e-05	0.4965	114	95	205314	54.1
O60443	O60443	GSDME	General	0.235	0.064	0.051	0.088	0.082	0.062	-0.507	-0.528	-0.543	0.063	-0.016	0.0805	0.943258	-0.0393333	0.000253444	-0.642667	2.7e-05	0.5685	52	26	55295.6	50.2
O60447	O60447	EVI5	General	0.016	0.036	0.058	-0.03	-0.028	0.017	-0.024	-0.042	-0.051	-0.055	-0.045	-0.0165	0.834494	-0.0503333	0.0624261	-0.0756667	0.997332	0.000166667	27	20	93517.7	23.9
O60462	O60462	NRP2	General	0.009	-0.019	-0.013	-0.038	0.06	0.02	0.06	-0.065	-0.115	0.089	-0.042	0.0085	0.950865	0.0216667	0.614602	-0.0323333	0.400249	0.0585	4	4	106226	4.1
O60476	O60476	MAN1A2	ER signal-anchored	-0.088	0.082	-0.102	-0.019	0.184	-0.014	-0.042	-0.032	-0.141	0.087	0.113	0.0075	0.901243	0.0863333	0.652	-0.0356667	0.0306433	0.140833	21	18	73230.4	29.3
O60479	O60479	DLX3	General	0	0.024	-0.013	0.079	-0.049	0.086	-0.208	-0.287	-0.061	0.013	-0.003	-0.0105	0.940308	0.035	0.0368874	-0.189	0.0270206	0.185167	4	4	31851.7	10.4
O60486	O60486	PLXNC1	General	-0.025	-0.127	-0.413	-0.464	0.113	-0.062	0.194	-0.082	-0.419	0.399	0.358	0.1045	0.985852	0.0506667	0.703381	0.086	0.0614591	0.3895	4	3	178534	2.6
O60487	O60487	MPZL2	General	-0.132	0.077	-0.106	-0.272	0.161	-0.336	0.455	0.286	0.097	0.037	0.284	-0.0305	0.944801	-0.0953333	0.0330307	0.333	0.189324	-0.1825	2	2	24654.9	9.3
O60488	O60488	ACSL4	ER signal-anchored	-0.024	-0.041	-0.06	-0.046	-0.077	-0.044	0.568	0.573	0.587	-0.028	-0.049	-0.0685	0.966475	-0.014	2.77e-05	0.617667	7.24e-06	-0.6245	116	49	80270.7	71.5
O60493	O60493	SNX3	General	-0.009	-0.016	0.059	0.065	-0.02	0.003	-0.05	-0.017	-0.024	-0.016	-0.059	0.0365	0.996126	0.00466667	0.329069	-0.0416667	0.702182	0.0175	28	17	18819.1	86.4
O60494	O60494	CUBN	General	-0.005	0.028	-0.006	-0.012	0.066	0.01	-0.075	-0.088	-0.064	0.073	0.045	0.0485	0.966475	0.0156667	0.0476052	-0.0813333	0.00714298	0.131167	4	4	407515	1.2
O60499	O60499	ST0	ER tail-anchored	-0.068	0.061	0.037	-0.005	-0.029	-0.076	0.251	0.201	0.175	-0.148	-0.055	-0.1345	0.908781	-0.0466667	0.0108876	0.199	0.000470784	-0.3215	18	13	28227.7	62.2
O60502	O60502	MGEA5	General	0.03	-0.061	-0.014	-0.004	0.003	-0.004	-0.036	-0.018	-0.085	0.056	0.022	0.0845	0.972912	0.0133333	0.507865	-0.0313333	0.0394766	0.1005	76	44	103997	57.2
O60503	O60503	ADCY9	General	-0.027	0.083	-0.038	-0.043	0.153	-0.059	0.016	-0.082	-0.016	0.006	0.065	0.0715	0.991086	0.011	0.576276	-0.0333333	0.135088	0.0748333	10	10	152923	8.5
O60504	O60504-2	SORBS3	General	-0.019	0.064	0.098	0.059	0.05	0.016	-0.131	-0.036	-0.102	-0.053	-0.052	-0.0755	0.99158	-0.006	0.039081	-0.137333	0.507128	0.0295	28	21	36912.6	60.4
O60506	O60506	SYNCRIP	Endoplasmic Reticulum	-0.057	0.04	0.122	-0.006	-0.212	0.017	-0.036	-0.071	0.076	-0.108	-0.078	-0.1325	0.886082	-0.102	0.558499	-0.0453333	0.105751	-0.0958333	7	42	69829.6	67.2
O60508	O60508	CDC40	General	0.016	-0.018	0.017	-0.008	-0.057	-0.012	0.031	-0.02	0.071	-0.007	0.042	0.0175	0.910628	-0.0306667	0.617921	0.0223333	0.836538	-0.00983333	54	36	66204.7	65.8
O60512	O60512	B4GALT3	General	-0.039	-0.083	0.029	0.032	0.031	0.084	-0.088	0.003	0.146	-0.079	-0.114	-0.0305	0.814575	0.08	0.542971	0.0513333	0.218733	-0.0948333	9	8	44212.5	20.3
O60513	O60513	B4GALT4	General	-0.015	-0.069	-0.137	-0.038	0.043	-0.023	-0.008	-0.103	-0.234	0.124	0.195	0.1935	0.863756	0.0676667	0.62405	-0.0413333	0.00522953	0.285833	12	10	40382.7	31.3
O60518	O60518	RANBP6	General	0.014	-0.02	-0.01	-0.071	-0.03	-0.04	0.268	0.309	0.297	-0.071	-0.071	-0.0925	0.880682	-0.0416667	0.000410358	0.296667	7.04e-05	-0.3695	45	38	126252	41.1
O60522	O60522	TDRD6	General	0.028	-0.002	-0.032	-0.027	0.011	0.042	0.021	-0.064	-0.03	0.004	-0.077	0.0205	0.982579	0.0106667	0.625405	-0.0223333	0.899569	0.00683333	7	5	239994	2.4
O60524	O60524	NEMF	General	0	0.009	0.038	0.034	0.005	0.018	-0.052	-0.038	-0.046	-0.012	-0.012	0.0055	0.996126	0.00333333	0.106245	-0.061	0.271808	0.0391667	78	49	123409	43.4
O60547	O60547	GMDS	General	0.093	0.014	0.013	-0.027	-0.002	-0.048	0.017	0.047	-0.008	0.015	-0.018	0.0195	0.82075	-0.0656667	0.645138	-0.0213333	0.747404	-0.0131667	44	25	42291.3	59.6
O60551	O60551	NMT2	General	0.006	0.026	-0.006	-0.035	0.013	0.029	-0.007	-0.028	-0.023	-0.007	-0.086	0.0355	0.98803	-0.00633333	0.423812	-0.028	0.997488	0.000166667	4	9	57321.5	17.8
O60563	O60563	CCNT1	General	-0.009	0.001	-0.005	0.002	-0.051	0.039	-0.043	0.001	0.049	-0.068	-0.01	-0.0315	0.99832	0.001	0.884365	0.00666667	0.393494	-0.0388333	52	31	81082.5	38.4
O60566	O60566-3	BUB1B	General	0.031	-0.014	0.035	0.034	0.016	-0.003	-0.051	-0.036	-0.071	0.017	0.011	-0.0155	0.997735	-0.00166667	0.0914943	-0.07	0.141205	0.0568333	97	61	122696	60.7
O60568	O60568	PLOD3	Endoplasmic Reticulum	-0.021	0.004	-0.048	-0.022	0.012	0.013	0.014	0.004	0.041	0.042	0.107	-0.0155	0.940308	0.0226667	0.283258	0.0413333	0.620464	0.0248333	88	46	85354.1	63.8
O60573	O60573	EIF4E2	General	0.072	-0.004	-0.056	-0.052	-0.006	0.078	-0.128	-0.039	-0.08	0.094	0.128	0.0445	0.997735	0.00266667	0.147866	-0.0863333	0.00749581	0.171167	32	15	28475.6	66.1
O60583	O60583-2	CCNT2	General	-0.032	0.098	-0.007	0.067	0.024	0.005	-0.091	-0.073	-0.133	-0.115	0.048	-0.0005	0.985852	0.0123333	0.0590039	-0.118667	0.205149	0.0765	14	13	74193.9	20.5
O60645	O60645	EXOC3	General	0.029	0.015	-0.039	-0.003	0.034	0.023	-0.122	-0.115	-0.17	0.081	0.087	0.0565	0.963397	0.0163333	0.0149997	-0.137333	0.00122318	0.2105	54	37	87356.8	49.6
O60658	O60658	PDE8A	General	0.084	-0.041	-0.048	-0.064	-0.005	-0.048	0.124	0.167	0.031	0.076	-0.015	0.0045	0.937011	-0.0373333	0.132599	0.109	0.149078	-0.0855	11	16	94443.4	20.3
O60664	O60664	PLIN3	General	-0.001	0.011	0.063	0.065	-0.042	-0.038	0	0.072	0.025	-0.078	-0.106	-0.0335	0.943258	-0.0293333	0.864228	0.008	0.0388035	-0.104833	100	34	47245.3	88
O60671	O60671	RAD1	General	0.058	-0.096	-0.033	-0.036	-0.007	-0.06	-0.05	0.035	-0.054	0.082	0.045	0.0615	0.9867	-0.0106667	0.992929	0.000666667	0.0782324	0.0858333	20	11	32454.3	46
O60674	O60674	JAK2	General	0.04	0.017	0	0.022	0.028	-0.043	0.033	-0.059	0.147	0.057	0.074	0.0185	0.96597	-0.0166667	0.770674	0.0213333	0.895775	0.0095	9	5	132212	3.7
O60675	O60675	MAFK	General	-0.064	-0.139	-0.055	0	-0.104	0.018	0.174	0.09	0.332	-0.006	0.01	0.0675	0.886515	0.0573333	0.0122311	0.284667	0.0450971	-0.174833	14	11	17579.8	66.6
O60678	O60678	PRMT3	General	0.089	-0.021	0.011	0.014	0.005	0.017	-0.081	-0.057	-0.116	0.074	-0.006	0.0565	0.972912	-0.0143333	0.0528608	-0.111	0.0192417	0.126167	42	25	60559.7	47
O60683	O60683-2	PE0	General	-0.104	0.078	-0.027	-0.07	0.119	0.002	0.106	0.07	-0.111	0.021	0.139	-0.0585	0.965428	0.0346667	0.680943	0.0393333	0.899548	0.0121667	2	2	39783.5	4.3
O60684	O60684	KPNA6	General	0.042	-0.046	-0.035	-0.03	-0.021	-0.024	0.018	0.058	-0.016	0.063	0.024	0.0595	0.977806	-0.012	0.499402	0.033	0.491659	0.0288333	92	37	60770.1	55.4
O60701	O60701	UGDH	General	0.081	0.007	0.036	0.043	0.024	0.033	-0.13	-0.098	-0.151	0.009	0.034	0.0415	0.985852	-0.008	0.00697395	-0.167667	0.00462255	0.1545	96	47	55707.7	90.6
O60704	O60704	TPST2	Endoplasmic Reticulum	0.833	-0.05	-0.267	-0.302	-0.243	0.014	0.224	0.091	0.153	0.447	0.247	0.0685	0.890021	-0.349	0.966014	-0.016	0.38753	0.0981667	3	3	42310.5	8.4
O60716	O60716-3	CTNND1	General	0.016	0.05	0.039	0.089	0.027	0.023	-0.154	-0.191	-0.197	0.029	0.027	0.0365	0.977806	0.0113333	0.0015541	-0.215667	0.000906136	0.2115	123	65	105545	76
O60725	O60725	ICMT	ER membrane	-0.351	0.039	-0.01	0.065	0.146	-0.069	0.267	0.337	0.215	-0.021	0.023	-0.3245	0.886082	0.154667	0.0236369	0.380333	0.00955363	-0.3805	3	3	32336.9	9.8
O60732	O60732	MAGEC1	General	-0.085	0.016	-0.057	-0.015	0.029	-0.114	0.208	0.154	0.012	-0.008	0.101	-0.1225	0.989839	0.00866667	0.0524037	0.166667	0.142715	-0.1345	2	2	123926	1.3
O60733	O60733	PLA2G6	General	0.095	0.001	-0.022	-0.054	-0.065	0.176	-0.088	-0.216	-0.038	0.063	-0.041	-0.0355	0.997735	-0.00566667	0.085011	-0.138667	0.125321	0.1095	4	3	90985.5	2.6
O60739	O60739	EIF1B	General	0.007	-0.058	0.047	0.055	0.011	0.035	-0.128	0.031	-0.065	0.05	-0.062	0.0195	0.920152	0.035	0.425158	-0.0526667	0.373958	0.0565	24	11	12937.5	81.4
O60749	O60749	SNX2	General	0.143	-0.046	-0.019	0.03	0.009	-0.002	-0.087	-0.079	-0.157	0.082	0.005	0.0765	0.986564	-0.0136667	0.0941057	-0.133667	0.0093106	0.162167	59	30	58584.2	50.8
O60763	O60763-2	USO1	General	-0.048	0.058	0.194	0.198	-0.095	-0.013	-0.065	0.005	0.096	-0.247	-0.084	-0.1465	0.972912	-0.038	0.545164	-0.056	0.035857	-0.171167	3	54	108806	56.2
O60763	O60763	USO1	General	-0.026	-0.048	-0.002	0.04	0.024	-0.001	0.036	0.026	-0.016	-0.032	-0.006	-0.0205	0.85399	0.0463333	0.303871	0.0406667	0.365481	-0.0348333	110	54	110106	56.8
O60765	O60765	ZNF354A	General	-0.002	0.099	-0.394	-0.112	-0.008	0.034	-0.027	-0.507	-0.565	0.141	0.112	0.1475	0.959251	0.0703333	0.265278	-0.267333	0.0141725	0.499833	11	8	71061.3	10.9
O60783	O60783	MRPS14	Mitochondria	0.006	0.1	-0.038	-0.012	0.023	-0.118	0.148	0.152	0.204	-0.13	-0.207	-0.1815	0.906424	-0.0583333	0.0321408	0.145333	0.000228725	-0.340833	11	6	15252.6	44.5
O60784	O60784	TOM1	General	0.003	-0.049	0.011	0.009	0.004	0.01	-0.043	0	0.024	-0.048	-0.052	-0.0175	0.947894	0.0193333	0.909813	0.00533333	0.418225	-0.0328333	36	20	54102.8	57.9
O60825	O60825	PFKFB2	General	0.117	0.063	0.068	-0.023	0.021	-0.001	-0.092	-0.051	-0.194	-0.016	0.04	-0.0425	0.693269	-0.0836667	0.0119229	-0.195	0.084742	0.106167	54	37	58989.2	73.2
O60826	O60826	CCDC22	General	0.027	0.017	0.052	0.043	-0.011	-0.005	-0.037	-0.008	-0.035	-0.029	-0.059	0.0005	0.940308	-0.023	0.123584	-0.0586667	0.951658	-0.0025	58	35	71096.6	63.7
O60828	O60828	PQBP1	General	-0.012	0.005	0.036	-0.01	-0.07	0.032	-0.027	-0.076	0.058	-0.087	-0.073	-0.0065	0.944703	-0.0256667	0.652537	-0.0246667	0.467086	-0.0405	26	13	30528.8	49
O60830	O60830	TIMM17B	Mitochondria	-0.201	0.056	-0.053	0.02	0.108	-0.074	0.021	0.137	0.029	0.029	-0.018	-0.0225	0.906424	0.084	0.177731	0.128333	0.207607	-0.0661667	8	6	18443.9	41.8
O60832	O60832	DKC1	General	-0.019	-0.018	-0.018	-0.009	-0.057	0.034	0.071	0.001	0.037	-0.076	0.071	-0.0385	0.9867	0.00766667	0.175999	0.0546667	0.372939	-0.0508333	93	46	58129.5	75.6
O60841	O60841	EIF5B	General	0.036	-0.003	0.02	-0.011	-0.027	-0.022	0.066	0.04	0.009	-0.032	-0.029	-0.0035	0.885527	-0.0376667	0.597016	0.0206667	0.139249	-0.0598333	227	94	139281	60.5
O60858	O60858-3	TRIM13	ER membrane	-0.096	-0.052	-0.007	0.06	0.07	-0.033	-0.003	-0.086	-0.118	0.07	0.075	0.1355	0.815969	0.084	0.760291	-0.0173333	0.0121999	0.1625	7	6	48187.9	16
O60869	O60869	EDF1	General	0.084	0.041	0.013	0.085	0.024	0.003	-0.192	-0.156	-0.224	0.062	0.042	0.0695	0.9867	-0.00866667	0.0021286	-0.236667	0.000626259	0.2485	48	20	16368.4	75
O60870	O60870	KIN	General	-0.011	-0.069	-0.008	0.005	-0.084	-0.037	0.074	0.118	0.062	-0.045	0.011	-0.0065	0.985852	-0.00933333	0.0278986	0.114	0.0371159	-0.0981667	33	21	45772.3	52.6
O60884	O60884	DNAJA2	Endoplasmic Reticulum	0.017	-0.039	-0.006	-0.034	-0.056	-0.007	0.102	0.08	0.09	-0.078	-0.033	-0.0215	0.940308	-0.023	0.0284942	0.1	0.00837996	-0.134833	79	30	46372.4	74.2
O60885	O60885	BRD4	General	-0.045	-0.008	0.008	0.018	-0.086	0.008	0.033	0.07	0.131	-0.092	-0.047	-0.0765	0.995236	-0.005	0.0735642	0.093	0.010595	-0.149833	87	56	152672	38.8
O60888	O60888-2	CUTA	General	0.067	0.021	0.004	0.009	0.029	-0.001	-0.134	-0.1	-0.066	0.055	-0.007	0.0965	0.950865	-0.0183333	0.0180887	-0.130667	0.0140495	0.148167	30	9	21096	67.6
O60890	O60890	OPHN1	General	0.042	-0.01	-0.02	0.007	-0.031	0.022	-0.073	-0.061	-0.071	0.095	0.028	0.0335	0.99288	-0.00466667	0.0863892	-0.0723333	0.0155428	0.1205	23	18	92266.6	23.6
O60907	O60907-2	TBL1X	General	-0.084	0.079	0.12	-0.07	-0.001	-0.151	0.213	0.268	0.114	-0.192	-0.086	-0.1545	0.848763	-0.112333	0.0872398	0.16	0.00104707	-0.3425	3	21	57732.2	49.8
O60909	O60909-3	B4GALT2	General	-0.054	-0.052	-0.1	-0.163	0.003	-0.021	0.157	0.162	0.006	0.101	-0.03	-0.0065	0.990498	0.00833333	0.0253362	0.177	0.222064	-0.0868333	8	7	45333.2	18.7
O60921	O60921	HUS1	General	0.085	-0.106	-0.094	-0.041	0.01	-0.121	-0.022	0.039	-0.036	0.067	0.069	0.1135	0.98803	-0.0123333	0.67678	0.032	0.0599408	0.0895	18	8	32089.7	32.8
O60925	O60925	PFDN1	General	0.093	-0.001	0.065	0.071	-0.007	-0.012	-0.064	-0.07	-0.038	-0.048	-0.035	0.0165	0.931629	-0.035	0.0381443	-0.109667	0.383108	0.0351667	21	12	14210.2	74.5
O60927	O60927	PPP1R11	General	-0.013	0.032	0.016	0.144	0.045	0.133	-0.098	-0.005	-0.033	-0.018	-0.087	-0.0115	0.737532	0.0956667	0.221916	-0.057	0.901447	0.0065	13	7	14237.5	60.3
O60930	O60930	RNASEH1	Mitochondria	0.05	-0.019	-0.058	-0.061	-0.062	0.015	0.006	0.035	0.102	0.005	-0.014	0.0315	0.948255	-0.027	0.30428	0.0566667	0.375988	-0.0401667	8	8	32348.9	36.7
O60934	O60934	NBN	General	-0.014	-0.056	-0.04	-0.025	-0.063	-0.003	0.053	0.021	0.072	-0.03	0.026	0.0365	0.98803	0.00633333	0.0519995	0.0853333	0.368874	-0.0378333	82	44	85642.2	71.8
O60936	O60936-3	NOL3	General	0.152	-0.013	0.045	0.004	-0.008	0.045	-0.074	-0.051	-0.115	-0.005	0.01	0.0445	0.919689	-0.0476667	0.0495605	-0.141333	0.0395695	0.0965	15	8	29639.6	41.4
O60941	O60941	DTNB	General	-0.089	0.086	-0.054	0.08	0.029	0.062	-0.128	0.005	0.159	0.005	0.064	-0.2165	0.880682	0.076	0.779467	0.031	0.606471	-0.0611667	3	7	72210.2	14.9
O60942	O60942	RNGTT	General	0.042	-0.033	-0.021	-0.018	-0.059	-0.019	0.097	0.121	0.073	-0.064	-0.02	-0.0055	0.936563	-0.028	0.04406	0.101	0.0130128	-0.126833	39	26	69468.4	48
O75027	O75027-2	ABCB7	Mitochondria	-0.086	0.003	-0.283	-0.017	0.127	-0.055	0.112	-0.01	-0.033	0.131	0.175	-0.0055	0.851781	0.140333	0.177926	0.145	0.302238	0.0771667	47	29	83053.2	43
O75030	O75030-2	MITF	General	0.092	0.069	0.094	0.047	0.04	0.034	-0.238	-0.273	-0.298	0.015	-0.007	0.0705	0.83313	-0.0446667	0.000247574	-0.354667	0.000433281	0.295833	31	20	58675.2	35
O75037	O75037	KIF21B	General	0.073	0.023	-0.056	0.006	-0.039	0.071	-0.025	-0.042	0.062	0.014	0.091	-0.0705	0.998591	-0.000666667	0.811677	-0.015	0.844866	0.0131667	9	17	184427	10.2
O75038	O75038	PLCH2	General	-0.512	-0.012	-0.009	0.174	0.252	-0.135	-0.125	-0.002	-0.03	-0.101	-0.228	-0.3385	0.852038	0.274667	0.48511	0.125333	0.056443	-0.170167	2	2	156035	1.3
O75044	O75044	SRGAP2	General	-0.029	0.041	0.031	0.104	0.052	0.073	-0.166	-0.178	-0.223	0.048	0.071	0.0525	0.82075	0.062	0.00366694	-0.203333	0.000578259	0.246167	55	42	122067	43.7
O75051	O75051	PLXNA2	General	-0.149	0.009	-0.107	-0.015	0.058	-0.066	0.041	-0.04	-0.021	0.094	0.121	0.0925	0.886082	0.0746667	0.245279	0.0756667	0.0281338	0.109167	21	24	214352	12.8
O75052	O75052	NOS1AP	General	0.002	0.011	-0.008	-0.078	0.017	-0.075	0.617	0.583	0.598	-0.029	-0.111	0.0545	0.886082	-0.047	2.92e-05	0.597667	4.5e-05	-0.627833	11	9	56491.1	17.5
O75054	O75054-2	IGSF3	General	-0.198	-0.028	-0.067	-0.011	0.072	-0.016	0.055	0.014	0.061	0.024	0.058	-0.0685	0.808018	0.112667	0.0536073	0.141	0.450329	-0.0388333	31	27	138654	29.5
O75054	O75054	IGSF3	General	-0.116	-0.11	-0.079	0.115	0.108	-0.001	0.093	0.018	-0.038	-0.107	0.103	-0.0075	0.390375	0.175667	0.0404328	0.126	0.718253	-0.0281667	3	27	136335	29.5
O75061	O75061-4	DNAJC6	General	0.089	0.055	0.083	0.058	0.034	0.059	-0.264	-0.272	-0.291	0.027	-0.024	0.0085	0.920152	-0.0253333	0.00019973	-0.351333	0.000297345	0.2795	24	20	99389	25.2
O75063	O75063	FAM20B	General	-0.042	-0.021	-0.09	-0.037	0.087	-0.072	0.149	0.075	0.057	0.022	0.091	0.0615	0.926588	0.0436667	0.0192194	0.144667	0.454128	-0.0355	17	13	46888.1	34.7
O75064	O75064	DENND4B	General	-0.016	0.016	0.002	-0.023	-0.048	0.02	0.015	0.033	0.087	-0.04	-0.05	-0.0405	0.953588	-0.0176667	0.283258	0.0443333	0.0490738	-0.0885	16	15	165841	12.4
O75069	O75069	TMCC2	ER membrane	-0.016	0.044	0.012	0.034	-0.08	-0.054	0.013	0.054	0.101	0.1	-0.027	-0.0915	0.896546	-0.0466667	0.352752	0.0426667	0.355871	-0.0621667	4	4	77732.5	4.3
O75071	O75071	EFCAB14	General	-0.02	0.09	0.023	-0.024	-0.003	-0.038	0.054	0.152	0.098	-0.169	-0.124	-0.0835	0.882873	-0.0526667	0.212612	0.0703333	0.00248091	-0.226833	13	11	55372.8	25.6
O75072	O75072	FKTN	Endoplasmic Reticulum	-0.107	0.023	-0.337	-0.147	0.068	0.054	-0.001	-0.098	-0.346	0.238	0.097	0.0855	0.886515	0.132	0.961603	-0.008	0.0277754	0.2885	4	4	54236.4	7.5
O75081	O75081	CBFA2T3	General	-0.016	-0.055	-0.125	-0.028	0.01	-0.031	0.014	0.062	0.051	-0.01	-0.007	0.0465	0.886235	0.049	0.053159	0.107667	0.428305	-0.0325	5	5	72160.7	9
O75083	O75083	WDR1	General	0.061	-0.02	0.063	0.127	0.024	0.039	-0.17	-0.167	-0.16	0.032	-0.007	0.0755	0.945266	0.0286667	0.00378895	-0.200333	0.0020045	0.199167	102	39	66876.9	70.6
O75094	O75094-4	SLIT3	General	-0.149	-0.091	-0.051	-0.035	-0.008	0.052	0.161	0.135	0.001	0.076	-0.111	-0.0995	0.75344	0.1	0.0208136	0.196	0.0947477	-0.143833	3	3	174721	2
O75096	O75096	LRP4	General	0.013	0.104	0.01	0.1	0.005	0.028	-0.227	-0.254	-0.248	0.021	0.022	-0.0025	0.997735	0.002	0.0012733	-0.285333	0.000345887	0.2565	12	10	217404	5.7
O75110	O75110	ATP9A	General	-0.051	0.109	-0.047	0.082	0.183	0.056	-0.315	-0.425	-0.443	0.094	0.193	0.0235	0.831386	0.103333	0.002285	-0.398	0.000309182	0.497833	21	17	120064	15.4
O75113	O75113	N4BP1	General	0.016	-0.043	0.021	0.021	-0.04	0.021	0.032	0.048	-0.008	0.01	-0.03	0.0265	0.997735	0.00266667	0.542927	0.026	0.60285	-0.0218333	28	26	101290	35.3
O75116	O75116	ROCK2	General	0.05	0.035	0.057	0.063	0.043	0.033	-0.205	-0.221	-0.276	0.043	0.042	0.0755	0.997903	-0.001	0.000728586	-0.281333	0.000373637	0.2875	186	112	162038	69
O75128	O75128-6	COBL	General	0.218	-0.408	0.126	0.069	-0.355	0.008	-0.515	-0.387	-0.24	0.235	0.092	0.1595	0.977189	-0.0713333	0.12237	-0.359333	0.000735822	0.542833	2	34	86361.2	49.9
O75128	O75128-2	COBL	General	0.011	0.077	0.071	0.147	0.019	0.114	-0.502	-0.54	-0.449	0.021	0.089	0.0535	0.921259	0.0403333	0.000103663	-0.55	3.18e-05	0.5515	92	57	144838	45.1
O75131	O75131	CPNE3	General	0.082	0	0.017	0.014	0.005	-0.008	0.003	0.052	-0.024	-0.028	-0.123	-0.0165	0.921857	-0.0293333	0.638525	-0.0226667	0.205128	-0.0661667	62	28	60985.3	52.7
O75132	O75132	ZBED4	General	0.083	-0.038	-0.009	-0.081	-0.09	0.013	0.126	0.122	0.183	-0.03	-0.038	-0.0235	0.886082	-0.0646667	0.0383225	0.131667	0.00297527	-0.174167	8	8	132031	5.4
O75140	O75140	DEPDC5	General	0.057	0.011	0.007	0.069	0.033	0.039	-0.135	-0.161	-0.151	-0.005	0.062	-0.0745	0.940308	0.022	0.00377114	-0.174	0.0202487	0.143167	12	11	182915	8.9
O75143	O75143-5	ATG13	General	-0.046	-0.064	-0.044	-0.042	-0.024	0.029	0.152	0.128	0.082	0.032	0.099	-0.1495	0.886515	0.039	0.00482296	0.172	0.128876	-0.126833	11	9	60724.5	22.3
O75145	O75145	PPFIA3	General	0.006	-0.043	-0.048	-0.013	-0.014	-0.008	0.024	-0.035	0.009	-0.036	-0.005	0.0375	0.95358	0.0166667	0.506276	0.0276667	0.991768	-0.0005	12	18	134065	14.1
O75146	O75146	HIP1R	General	0.01	0.063	0.068	0.052	0.002	-0.001	-0.075	-0.061	-0.079	-0.055	0.018	-0.0215	0.921857	-0.0293333	0.0168902	-0.118667	0.203563	0.0521667	106	71	120071	60.2
O75147	O75147	OBSL1	General	0.002	0.016	0.042	-0.03	-0.074	-0.07	-0.01	0.076	0.089	-0.076	-0.096	-0.0415	0.709464	-0.078	0.504966	0.0316667	0.0278319	-0.122833	45	34	210024	22.7
O75150	O75150	RNF40	General	-0.002	-0.017	0.004	0.011	-0.034	0.01	0.028	0.002	0.03	-0.054	-0.014	-0.0255	0.998591	0.000666667	0.473333	0.025	0.181628	-0.0511667	140	76	114390	64
O75151	O75151	PHF2	General	-0.03	0.012	0.008	-0.002	-0.116	0.015	0.111	0.095	0.209	-0.079	-0.031	-0.1145	0.943258	-0.031	0.024959	0.141667	0.0045155	-0.213167	20	20	121743	20
O75152	O75152	ZC3H11A	General	-0.046	-0.018	-0.01	-0.011	-0.066	0.005	0.132	0.125	0.204	-0.073	0.056	0.0005	0.998591	0.000666667	0.00588672	0.178333	0.0171969	-0.159167	105	56	89985.3	62.7
O75153	O75153	CLUH	General	0.041	0.01	0.063	0.002	-0.01	0.007	-0.037	-0.015	-0.04	-0.037	-0.03	0.0025	0.886082	-0.0383333	0.0915339	-0.0686667	0.816285	0.00916667	148	77	148094	65.9
O75157	O75157	TSC22D2	General	0.024	0.043	0.055	0.116	0.065	0.056	-0.425	-0.463	-0.526	-0.029	-0.041	0.0015	0.886515	0.0383333	0.0001134	-0.512	7.64e-05	0.4485	8	10	79626.2	15.1
O75161	O75161	NPHP4	General	-0.05	-0.01	0.034	0.096	-0.021	0.019	-0.003	-0.035	0.141	-0.051	-0.018	0.0065	0.920152	0.04	0.534783	0.043	0.382848	-0.0551667	9	9	158850	7.6
O75164	O75164	KDM4A	General	0.007	-0.012	-0.005	0.026	-0.023	0.036	-0.012	0.001	-0.022	-0.005	0.007	0.0165	0.957714	0.0163333	0.829532	-0.00766667	0.638843	0.0171667	33	27	122657	26.5
O75165	O75165	DNAJC13	General	0.022	0.014	-0.012	-0.013	0.015	-0.004	-0.038	-0.048	-0.056	0.062	0.12	0.0265	0.982599	-0.00866667	0.133002	-0.0553333	0.0234731	0.116833	169	107	256692	47
O75167	O75167-4	PHACTR2	General	0.006	0.015	-0.024	0.084	0.029	0.074	-0.221	-0.146	-0.16	0.056	0.024	0.0705	0.805167	0.0633333	0.00578574	-0.174667	0.00132036	0.225833	14	11	70839.6	13.9
O75170	O75170-5	PPP6R2	General	0.018	0.024	0.072	0.013	-0.011	0.035	-0.037	-0.049	0.001	-0.041	-0.044	-0.0375	0.936766	-0.0256667	0.121894	-0.0663333	0.748356	-0.0125	33	29	105717	44.6
O75175	O75175	CNOT3	General	-0.005	-0.014	0.014	-0.007	-0.048	-0.017	0.068	0.022	0.04	-0.049	0.006	0.0505	0.937772	-0.0223333	0.230557	0.045	0.37113	-0.0408333	33	21	82098.7	34.9
O75177	O75177	SS18L1	General	0.059	-0.045	0.092	0.196	-0.081	0.001	-0.058	-0.025	0.011	-0.125	-0.106	0.0215	0.997839	0.00333333	0.306021	-0.0593333	0.431821	-0.0458333	3	3	43103.8	6.3
O75179	O75179	ANKRD17	General	-0.01	0	0.014	0.001	-0.045	-0.013	0.034	0.057	0.054	-0.072	-0.055	-0.0275	0.942978	-0.0203333	0.187713	0.047	0.0244109	-0.0998333	104	90	276136	39.1
O75182	O75182-2	SIN3B	General	0.007	0	0.007	0.003	-0.042	0.034	0.031	0.027	-0.006	0.016	0.051	-0.0065	0.98803	-0.00633333	0.726978	0.0126667	0.946847	0.00283333	45	40	130327	33.4
O75190	O75190	DNAJB6	General	-0.018	0.01	-0.07	-0.088	-0.004	-0.062	0.313	0.341	0.368	0.016	-0.005	-0.0085	0.944801	-0.0253333	0.000370037	0.366667	0.000123605	-0.339833	37	17	36143.4	41.4
O75191	O75191	XYLB	General	-0.007	-0.111	0.002	0.036	-0.04	-0.008	0.131	0.2	0.166	-0.044	-0.094	-0.0545	0.937011	0.0346667	0.0078049	0.204333	0.00109995	-0.229833	13	11	59122.8	24.6
O75197	O75197	LRP5	Endoplasmic Reticulum	-0.037	0.032	-0.022	-0.04	0.007	-0.077	0.077	0.141	0.046	0.066	0.002	-0.0755	0.940308	-0.0276667	0.0723859	0.097	0.133583	-0.0905	16	15	182393	11.6
O75208	O75208	COQ9	Mitochondria	0.001	0.072	-0.088	-0.023	0.026	-0.158	0.085	0.131	0.045	-0.037	0.058	-0.1495	0.942978	-0.0466667	0.162725	0.092	0.0833865	-0.129833	13	10	35679.5	43.3
O75223	O75223	GGCT	General	0.102	-0.024	0.016	0.073	0.048	0.021	-0.139	-0.047	-0.139	0.015	-0.074	0.0675	0.972912	0.016	0.0438386	-0.139667	0.0813147	0.111167	44	17	21235.6	88.8
O75298	O75298	RTN2	ER membrane	-0.306	0.046	-0.06	-0.004	0.119	-0.021	0.174	-0.007	0.008	0.013	-0.015	-0.1065	0.881235	0.138	0.206926	0.165	0.20196	-0.0945	6	4	59491	7.5
O75306	O75306	NDUFS2	Mitochondria	-0.051	0.075	-0.069	-0.06	0.014	-0.109	0.196	0.258	0.241	-0.024	-0.099	-0.0675	0.944801	-0.0366667	0.00591891	0.246667	0.000431311	-0.295167	44	25	52944.1	64.3
O75312	O75312	ZPR1	General	-0.005	-0.011	0.047	0.035	0.011	-0.015	-0.012	-0.038	-0.04	-0.022	-0.067	0.0265	1	1.73e-18	0.306024	-0.0403333	0.843543	0.00916667	38	23	51494.9	55.1
O75319	O75319	DUSP11	General	-0.009	-0.021	0.009	0.004	-0.099	0.029	0.018	0.02	0.112	-0.193	-0.055	-0.0905	0.977806	-0.015	0.232555	0.057	0.0221031	-0.162833	27	20	39280.4	63
O75323	O75323	NIPSNAP2	Mitochondria	0.043	0.036	-0.062	-0.018	0.007	-0.065	0.189	0.144	0.198	-0.093	-0.107	-0.0365	0.940308	-0.031	0.0122335	0.171333	0.000762353	-0.255833	20	11	33970.2	43.7
O75325	O75325	LRRN2	General	-0.121	-0.045	-0.057	-0.092	0.009	0.05	0.159	0.187	0.299	-0.072	-0.006	-0.0985	0.886082	0.0633333	0.00323635	0.289333	0.00233969	-0.273833	6	5	79656.1	7.8
O75326	O75326	SEMA7A	General	0.011	0.109	-0.073	-0.077	0.023	0.05	-0.142	-0.123	-0.016	-0.007	-0.02	-0.0825	0.985852	-0.017	0.162193	-0.109333	0.300479	0.0571667	2	2	75906.4	2.4
O75330	O75330-3	HMMR	General	-0.009	-0.044	0.015	-0.009	-0.079	-0.036	0.328	0.344	0.279	-0.099	-0.079	-0.0575	0.932132	-0.0286667	0.000473472	0.329667	7.92e-05	-0.3955	77	49	84626.5	60.6
O75333	O75333	TB0	General	-0.01	-0.001	-0.176	-0.057	0.045	0	-0.294	-0.349	-0.207	0.12	0.026	0.0945	0.91589	0.0583333	0.0245779	-0.221	0.000609139	0.3635	6	5	42511.7	14.2
O75335	O75335	PPFIA4	General	0.013	-0.023	0.06	0.207	-0.201	-0.011	-0.003	0.076	0.068	-0.111	-0.054	-0.0795	0.989839	-0.0183333	0.532117	0.0303333	0.0181991	-0.1285	6	17	135029	12.7
O75340	O75340	PDCD6	Endoplasmic Reticulum	0.104	0.051	0.049	0.012	0.022	0.025	-0.188	-0.188	-0.17	0.047	0.025	0.0265	0.85009	-0.0483333	0.000975265	-0.25	0.000732928	0.214833	52	19	21925.1	86.9
O75348	O75348	ATP6V1G1	General	0.026	-0.118	0.09	0.018	-0.073	-0.016	0.051	-0.051	-0.01	-0.068	0.01	0.0405	0.97357	-0.023	0.974708	-0.00266667	0.9643	-0.0025	11	6	13871.4	66.1
O75351	O75351	VPS4B	General	0.011	-0.019	0.045	0.061	0.011	0.002	-0.032	-0.024	-0.061	-0.003	-0.058	-0.0105	0.97357	0.0123333	0.209032	-0.0513333	0.712276	0.0151667	46	32	49472.3	68.4
O75352	O75352	MPDU1	General	-0.087	-0.077	0.019	0.053	0.035	0.021	-0.015	-0.097	-0.057	0.014	-0.051	0.0635	0.805167	0.0846667	0.889645	-0.008	0.213361	0.0651667	13	6	26922.6	21
O75356	O75356	ENTPD5	Endoplasmic Reticulum	-0.049	-0.005	0.046	-0.016	-0.018	-0.03	0.056	-0.037	0.065	-0.054	-0.021	-0.0415	0.957777	-0.0186667	0.576688	0.0306667	0.167307	-0.0668333	6	5	47915.8	12.8
O75362	O75362	ZNF217	General	-0.044	0.003	0.002	-0.019	-0.045	-0.004	0.313	0.337	0.401	-0.114	-0.065	-0.0545	0.982205	-0.00966667	0.000429334	0.363333	9.44e-05	-0.428167	36	30	117153	33.8
O75367	O75367	H2AFY	General	-0.031	0.007	0.018	0.031	-0.087	0.04	-0.028	-0.031	0.044	-0.119	0.027	-0.0355	0.997735	-0.00333333	0.949581	-0.003	0.516967	-0.0375	74	26	39787.5	71.5
O75368	O75368	SH3BGRL	General	0.085	-0.01	0.033	0.089	0.085	0.008	-0.217	-0.206	-0.321	0.078	-0.026	0.0695	0.950865	0.0246667	0.00290248	-0.284	0.00170942	0.2885	24	10	12774	91.2
O75369	O75369-8	FLNB	General	0.046	0.033	0.044	0.092	0.029	0.049	-0.149	-0.142	-0.108	-0.034	0.024	0.0515	0.959251	0.0156667	0.00306064	-0.174	0.00965368	0.146833	414	183	283798	79.4
O75376	O75376	NCOR1	General	-0.022	-0.002	0.016	-0.015	-0.074	-0.002	0.072	0.072	0.153	-0.118	-0.054	-0.0885	0.933873	-0.0276667	0.0476992	0.101667	0.00449474	-0.185833	96	74	271118	37.6
O75379	O75379	VAMP4	ER tail-anchored	-0.143	0.035	0.039	0.182	0.039	0.008	-0.007	-0.014	0.042	-0.039	0.132	-0.0695	0.885527	0.0993333	0.683965	0.03	0.991575	0.000833333	5	3	16453.6	31.9
O75380	O75380	NDUFS6	Mitochondria	0.066	0.063	0.026	-0.009	-0.03	-0.039	0.168	0.163	0.313	-0.228	-0.279	-0.1015	0.693269	-0.0776667	0.0296903	0.163	0.00108006	-0.4175	12	7	14053.7	64.5
O75381	O75381	PE4	General	-0.024	0.074	0.033	0.019	0.002	0.002	-0.071	-0.03	-0.078	-0.05	0.072	-0.0425	0.95358	-0.02	0.086641	-0.0873333	0.315908	0.0528333	28	18	41292.9	50.9
O75382	O75382	TRIM3	General	-0.001	-0.018	0.034	0.063	0.026	0.034	-0.07	-0.035	-0.05	-0.011	-0.016	-0.0535	0.888081	0.036	0.153261	-0.0566667	0.51842	0.0248333	20	16	81912.1	25
O75385	O75385	ULK1	General	-0.039	0.086	0.091	0.114	0.023	0.018	-0.116	-0.127	-0.131	-0.053	0.017	-0.0575	0.996126	0.00566667	0.0165125	-0.170667	0.0454367	0.0935	13	11	113656	11.3
O75386	O75386-2	TULP3	General	0.032	-0.103	-0.041	-0.034	-0.074	-0.021	0.029	0.107	0.15	-0.095	0.01	-0.0105	0.994172	-0.00566667	0.0625542	0.132667	0.0453817	-0.127167	12	11	57057.7	25.1
O75390	O75390	CS	Mitochondria	-0.031	-0.004	-0.144	-0.042	0.001	-0.05	0.158	0.139	0.23	0.036	-0.008	-0.0345	0.948255	0.0293333	0.0078049	0.235333	0.00607997	-0.177833	81	24	51939.7	54.5
O75391	O75391	SPAG7	General	0.051	0.072	0.084	0.04	-0.005	0	-0.01	-0.036	-0.044	-0.077	-0.059	-0.0185	0.815969	-0.0573333	0.0254897	-0.099	0.592745	-0.0215	41	23	26148.1	71.3
O75394	O75394	MRPL33	Mitochondria	0.027	0.069	0.012	0.057	0.017	-0.234	0.071	-0.067	-0.091	-0.109	-0.063	0.0515	0.901243	-0.0893333	0.312994	-0.065	0.887443	-0.0111667	5	3	7676.1	47.6
O75396	O75396	SEC22B	ER tail-anchored	-0.016	0.042	0.143	0.095	0.086	0.043	-0.188	-0.297	-0.35	0.02	0.132	0.0595	0.972912	0.0183333	0.0045651	-0.334667	0.00115358	0.348833	39	16	24821.1	54.8
O75398	O75398	DEAF1	General	-0.009	-0.02	0.042	0.019	-0.065	-0.001	-0.001	0.034	0.095	-0.166	-0.094	-0.0835	0.957714	-0.02	0.425667	0.0383333	0.0125383	-0.157167	7	6	60239.3	9.3
O75400	O75400	PRPF40A	General	-0.001	0.022	-0.011	-0.02	-0.051	-0.005	0.037	-0.004	0.076	-0.064	0.001	-0.0275	0.91589	-0.0286667	0.43137	0.033	0.148824	-0.0665	95	42	109088	34.9
O75410	O75410	TACC1	General	0.021	0.026	0.025	0.062	0.015	0.071	-0.13	-0.197	-0.082	-0.013	0.039	0.0605	0.924508	0.0253333	0.0121637	-0.160333	0.0112178	0.165167	33	26	88648.6	29.1
O75419	O75419-3	CDC45	General	0.006	-0.003	0.023	-0.026	-0.004	0.024	0.112	0.064	-0.001	-0.066	-0.028	-0.0265	0.97357	-0.0106667	0.302451	0.0496667	0.0608806	-0.0985	18	13	69451.6	21.4
O75420	O75420	GIGYF1	General	0.056	0.015	0.032	0.033	0.012	0.025	-0.109	-0.116	-0.095	-0.066	-0.092	0.0325	0.972912	-0.011	0.00680662	-0.141	0.202783	0.0648333	27	23	115113	24.7
O75427	O75427	LRCH4	General	-0.017	0.109	0.04	0.137	0.02	0.099	-0.194	-0.201	-0.098	0.011	0.066	-0.0005	0.933873	0.0413333	0.0113106	-0.208333	0.00595859	0.189833	18	14	74133.6	33
O75431	O75431	MTX2	Outer mitochondrial membrane	-0.003	-0.049	-0.138	-0.05	-0.013	0.041	-0.022	0.009	0.048	0.063	0.077	0.0555	0.890021	0.056	0.197043	0.075	0.190454	0.0535	24	12	30105	60.8
O75436	O75436	VPS26A	General	0.016	-0.013	-0.024	-0.013	0.03	0.063	-0.089	-0.051	-0.147	0.097	0.077	0.0115	0.90885	0.0336667	0.0764049	-0.0886667	0.0122913	0.1575	66	31	38283.3	77
O75438	O75438-2	NDUFB1	Mitochondria	0.297	0.033	-0.121	-0.093	-0.08	-0.059	0.161	0.007	-0.31	0.056	0.143	0.2055	0.882873	-0.147	0.544209	-0.117	0.20196	0.182167	5	2	12083	11.4
O75439	O75439	PMPCB	Mitochondria	-0.014	0.057	-0.089	-0.032	0.009	-0.059	0.219	0.197	0.263	-0.011	-0.015	0.0055	0.985852	-0.012	0.00558973	0.241667	0.000795271	-0.233167	53	26	55106.9	58.6
O75445	O75445-3	USH2A	General	0.116	0.093	-0.221	-0.003	0.026	-0.008	-0.318	-0.429	-0.485	0.21	0.057	0.0615	0.997353	0.009	0.0147567	-0.406667	0.000357393	0.520167	3	3	589333	0.7
O75446	O75446	SAP30	General	0.064	0.037	0.032	0.028	-0.068	-0.033	-0.008	-0.039	0.005	-0.153	-0.013	-0.0415	0.815969	-0.0686667	0.13415	-0.0583333	0.311104	-0.0551667	16	9	23591.1	61.3
O75449	O75449	KATNA1	General	0.03	-0.046	0.004	-0.024	-0.045	-0.067	0.16	0.202	0.195	-0.033	-0.088	-0.0295	0.886515	-0.0413333	0.00424317	0.189667	0.000861958	-0.235833	39	31	56249.1	57.4
O75459	O75459	PAGE1	General	-0.006	-0.081	-0.106	0.06	0.003	0.011	-0.083	-0.043	-0.07	0.014	0.127	0.1555	0.79464	0.089	0.984633	-0.001	0.015017	0.164167	20	8	16321.2	52
O75460	O75460	ERN1	ER membrane	-0.028	0.003	0.029	0.07	-0.024	0.029	0.08	0.098	0.224	-0.064	-0.048	-0.0245	0.948255	0.0236667	0.0513676	0.132667	0.0115778	-0.1795	2	2	110589	2.9
O75461	O75461	E2F6	General	0.062	-0.095	-0.123	-0.105	-0.055	0	0.069	0.053	0.113	0.043	0.036	-0.0685	0.998591	-0.00133333	0.0889666	0.130333	0.156933	-0.0748333	3	2	32014.6	8.1
O75462	O75462	CRLF1	General	-0.01	0.08	0.039	0.054	0.029	0.108	-0.535	-0.744	-0.825	0.07	0.005	0.0385	0.943258	0.0273333	0.000550553	-0.737667	0.000167059	0.739167	7	7	46985.5	22.5
O75467	O75467	ZNF324	General	-0.045	0.135	-0.265	-0.05	-0.017	0.062	-0.105	-0.269	-0.073	0.14	0.1	0.1295	0.957714	0.0566667	0.51164	-0.0906667	0.00439745	0.272167	18	14	62301	27.1
O75475	O75475	PSIP1	General	0.03	0.049	0.041	0.092	-0.045	0.047	-0.115	-0.106	-0.02	-0.127	0.05	0.0045	0.98803	-0.00866667	0.0297673	-0.120333	0.40038	0.0561667	108	49	60216.3	67.5
O75477	O75477	ERLIN1	ER membrane	-0.086	-0.06	0.035	0.02	0.019	-0.088	0.182	0.041	0.019	-0.103	0.043	-0.0245	0.972569	0.0206667	0.125837	0.117667	0.139845	-0.108833	25	20	39096.3	52.3
O75478	O75478	TADA2A	General	0.064	-0.006	-0.056	-0.006	-0.006	0.09	-0.121	0.004	0.09	0.019	0.039	0.0065	0.958361	0.0253333	0.911599	-0.00966667	0.660615	0.0305	8	7	52246.6	17.3
O75486	O75486	SUPT3H	General	-0.116	-0.01	-0.176	-0.125	0.072	-0.142	0.524	0.623	0.514	0.216	0.252	-0.0775	0.966475	0.0356667	0.00023501	0.654333	0.00509134	-0.4235	3	2	44646.1	6
O75489	O75489	NDUFS3	Mitochondria	0.034	-0.01	-0.112	-0.101	-0.037	-0.053	0.186	0.183	0.223	0.079	-0.071	-0.0305	0.940308	-0.0343333	0.00661033	0.226667	0.00663195	-0.204833	47	23	30355.1	62.8
O75494	O75494	SRSF10	General	0.087	0.037	0	0.05	-0.102	0.088	-0.131	-0.097	-0.003	-0.04	0.013	0.0085	0.966475	-0.0293333	0.0658358	-0.118333	0.185484	0.0708333	47	21	31357	49.6
O75496	O75496	GMNN	General	-0.007	-0.031	0.003	-0.005	0.009	0.007	0.047	0.123	0.085	-0.015	-0.082	-0.0075	0.95358	0.0153333	0.0439883	0.0966667	0.0267979	-0.119833	17	9	23678.8	39.7
O75506	O75506	HSBP1	General	0.035	-0.012	-0.078	-0.006	0.001	0.03	-0.02	0.01	0.039	0.046	-0.032	0.0475	0.943802	0.0266667	0.578466	0.028	0.822107	0.0108333	18	9	8543.4	98.6
O75521	O75521	ECI2	Mitochondria	0.051	0.099	0.06	0.034	-0.006	0.02	-0.099	-0.113	-0.036	-0.085	-0.04	-0.0535	0.82075	-0.054	0.010725	-0.152667	0.597137	0.0231667	57	26	43983.7	69.5
O75528	O75528	TADA3	General	-0.023	-0.072	-0.032	0.031	-0.021	0.016	0.06	0.114	0.134	-0.084	-0.043	-0.0195	0.849056	0.051	0.0120364	0.145	0.0088556	-0.1515	19	18	49129.7	44.2
O75529	O75529	TAF5L	General	-0.06	-0.06	-0.094	-0.023	-0.11	-0.022	0.169	0.167	0.306	-0.05	-0.044	-0.0685	0.958361	0.0196667	0.00313374	0.285333	0.0020045	-0.268167	13	10	66838.7	21
O75530	O75530	EED	General	-0.003	-0.062	-0.131	-0.057	-0.046	-0.016	0.126	0.144	0.137	0.078	0.113	0.0485	0.94848	0.0256667	0.00669658	0.201	0.165847	-0.0558333	39	27	50938.5	57.8
O75531	O75531	BANF1	General	0.184	-0.201	-0.417	-0.018	0.005	0.038	-0.134	-0.189	-0.144	0.205	-0.038	0.3375	0.909277	0.153	0.955137	-0.011	0.0163105	0.323833	36	13	10286.6	79.7
O75533	O75533	SF3B1	General	-0.001	-0.011	-0.017	0.002	-0.045	0.027	0.022	0.02	0.018	-0.015	0.057	-0.0085	0.993628	0.00433333	0.375427	0.0296667	0.838972	-0.00883333	238	101	146570	75.6
O75534	O75534	CSDE1	General	0.057	0.011	0.064	0.019	-0.041	0	-0.038	-0.026	-0.005	-0.05	-0.057	-0.0015	0.852038	-0.0513333	0.104265	-0.067	0.74778	-0.0131667	175	65	89738.9	73
O75554	O75554	WBP4	General	0.049	0.032	0.008	0.045	-0.031	0.064	-0.11	-0.153	-0.068	0.015	0.094	0.0605	0.997353	-0.00366667	0.0141875	-0.14	0.00755405	0.166833	16	10	42677.2	37.5
O75558	O75558	ST1	General	-0.104	-0.072	-0.072	-0.046	0.027	-0.091	0.436	0.373	0.223	0.027	-0.033	0.0685	0.891992	0.046	0.00156812	0.426667	0.00307483	-0.323167	3	3	33651.7	14.9
O75569	O75569	PRKRA	General	-0.026	0.046	0.09	0.014	-0.014	-0.056	0.057	0.058	0.026	-0.128	-0.081	-0.1045	0.886082	-0.0553333	0.840406	0.0103333	0.00479224	-0.1515	22	15	34860	50.7
O75570	O75570-2	MTRF1	Mitochondria	-0.017	-0.055	-0.083	-0.094	0.005	0.027	-0.167	-0.004	0.181	0.088	0.055	-0.0215	0.942978	0.031	0.622196	0.055	0.73179	0.0371667	5	5	55134.6	15.1
O75575	O75575	CRCP	General	-0.001	-0.038	0.012	0.008	-0.126	0.01	0.188	0.196	0.263	-0.111	-0.089	-0.0815	0.95358	-0.027	0.00251631	0.224667	0.000289544	-0.3095	5	5	16927.8	33.7
O75581	O75581	LRP6	Endoplasmic Reticulum	-0.051	0.059	-0.012	-0.043	0.017	-0.099	0.043	0.011	0.125	0.032	0.032	-0.0115	0.924508	-0.0403333	0.299966	0.061	0.388755	-0.0421667	23	21	183450	14.6
O75582	O75582	RPS6KA5	General	0.156	0.09	0.12	0.102	0.008	0.119	-0.331	-0.312	-0.256	-0.01	0.015	0.0075	0.901243	-0.0456667	0.000233778	-0.421667	0.000286746	0.303833	15	15	90434.3	16.4
O75592	O75592	MYCBP2	General	0.014	0.02	0.013	-0.002	-0.011	0.002	-0.021	0	-0.014	-0.032	-0.04	-0.0135	0.940308	-0.0193333	0.417704	-0.0273333	0.6487	-0.0168333	120	103	518177	24.9
O75600	O75600-2	GCAT	Mitochondria	-0.088	0.112	-0.044	-0.011	-0.021	-0.048	0.002	0.052	0.137	-0.037	-0.085	-0.1335	0.977806	-0.02	0.389684	0.0703333	0.026427	-0.148833	14	10	48658.1	33.9
O75607	O75607	NPM3	General	-0.031	0.05	0.046	-0.024	-0.097	0.006	0.022	0.087	0.147	-0.128	-0.1	-0.1005	0.881235	-0.06	0.267535	0.0636667	0.00478342	-0.194833	21	7	19628.6	64.6
O75608	O75608	LYPLA1	Endoplasmic Reticulum	0.046	-0.025	0.014	0.05	0.046	0.011	-0.126	-0.05	-0.125	-0.014	-0.044	0.0565	0.940308	0.024	0.0414201	-0.112	0.0684156	0.0998333	32	11	25011.5	80.8
O75616	O75616	ERAL1	Mitochondria	-0.021	0.058	-0.071	-0.017	0.017	-0.049	0.059	0.064	0.12	-0.046	-0.018	-0.0045	0.996126	-0.005	0.113004	0.0923333	0.0294028	-0.103833	28	17	48862.7	50.1
O75618	O75618-2	DEDD	General	-0.033	0.089	0.059	-0.013	-0.072	0.022	-0.093	-0.137	-0.034	-0.045	0.023	-0.0335	0.886082	-0.0593333	0.0575111	-0.126333	0.165227	0.0695	3	3	40874	10
O75626	O75626	PRDM1	General	0.033	-0.103	-0.018	-0.091	-0.055	0.019	0.149	0.173	0.338	0.05	0.042	0.0645	0.985852	-0.013	0.0166792	0.249333	0.0288561	-0.167833	3	3	93024.2	3.1
O75629	O75629	CREG1	General	-0.035	0.031	0.046	0.077	0.054	-0.002	-0.179	-0.112	-0.232	0.104	0.18	0.0625	0.940308	0.029	0.0114585	-0.188333	0.00160665	0.289833	11	6	24188.2	30
O75635	O75635-2	SERPINB7	Endoplasmic Reticulum	-0.312	0.074	0.321	-0.073	0.016	-0.189	0.943	0.803	0.572	-0.329	-0.303	-0.1025	0.944801	-0.109667	0.0124034	0.745	0.000185116	-1.0175	3	2	41458.5	4.9
O75638	O75638	CTAG2	General	-0.028	-0.018	0.045	0.157	-0.094	0.02	-0.108	-0.095	0.245	-0.159	-0.119	0.0975	0.972569	0.028	0.916168	0.0143333	0.590962	-0.0741667	23	12	21231.3	71.9
O75643	O75643	SNRNP200	General	-0.024	-0.028	-0.043	-0.034	-0.031	0.009	0.086	0.079	0.069	-0.005	0.052	-0.0165	0.966475	0.013	0.0141249	0.109667	0.11009	-0.0678333	391	176	246158	71.6
O75648	O75648	TRMU	Mitochondria	0.01	-0.018	-0.177	-0.038	0.003	-0.09	0.251	0.289	0.335	0.079	0.056	-0.0035	0.978387	0.02	0.00312428	0.353333	0.00137967	-0.247833	21	16	48314.3	39.4
O75663	O75663	TIPRL	General	0.016	-0.023	0.07	0.015	-0.004	-0.018	0.013	0.065	0.07	-0.046	-0.093	-0.0385	0.944801	-0.0233333	0.54598	0.0283333	0.0272735	-0.1085	40	18	31671.6	66.5
O75665	O75665	OFD1	General	0.057	0.008	0.013	0.068	0.009	0.093	-0.148	-0.191	-0.161	0.056	0.05	0.0575	0.924508	0.0306667	0.0028721	-0.192667	0.000725394	0.221167	39	36	117126	38.3
O75674	O75674	TOM1L1	General	0.103	0.085	0.095	0.076	0.022	-0.01	-0.129	-0.155	-0.221	-0.024	0.009	-0.0035	0.815969	-0.065	0.0013673	-0.262667	0.00661284	0.162167	13	10	53159.1	39
O75676	O75676	RPS6KA4	General	-0.015	0.057	0.07	-0.035	-0.081	-0.021	0.116	0.079	0.086	-0.067	-0.079	-0.0845	0.805167	-0.083	0.214958	0.0563333	0.00233969	-0.1705	18	17	86174.8	23.5
O75683	O75683	SURF6	General	0.027	0.022	0.021	0.024	-0.064	0.012	0.004	-0.024	-0.016	-0.034	0.043	0.0185	0.920152	-0.0326667	0.3038	-0.0353333	0.617039	0.0211667	38	22	41563.8	50.4
O75688	O75688	PPM1B	General	0.06	0.02	0.031	0.054	0.009	0.015	-0.129	-0.135	-0.054	0.03	-0.079	0.0225	0.97357	-0.011	0.0141919	-0.143	0.089753	0.0971667	32	23	53212.2	54.9
O75691	O75691	UTP20	General	-0.008	-0.015	-0.044	-0.037	-0.011	0.045	0.118	0.057	-0.037	0.028	0.141	0.0085	0.948255	0.0213333	0.24747	0.0683333	0.852746	0.0131667	275	160	321004	57.1
O75694	O75694	NUP155	General	-0.043	0.011	-0.021	0.002	-0.006	0.024	0.006	0.032	-0.012	0.005	0.082	-0.0495	0.936766	0.0243333	0.499588	0.0263333	0.944413	0.00383333	153	69	156794	57.3
O75695	O75695	RP2	General	-0.018	0.08	-0.179	-0.01	0.194	-0.084	-0.043	-0.135	-0.254	0.082	0.083	0.0925	0.940308	0.0723333	0.321729	-0.105	0.00885165	0.229833	24	16	40496.2	39.1
O75717	O75717	WDHD1	General	0.034	0.033	0.061	0.055	0.007	0.002	-0.042	-0.065	-0.077	-0.037	0.02	-0.0005	0.943258	-0.0213333	0.0209609	-0.104	0.168946	0.0555	117	65	127448	64
O75718	O75718	CRTAP	Endoplasmic Reticulum	-0.011	-0.03	-0.078	-0.026	-0.017	0.002	0.059	0.025	0.041	0.034	0.141	0.0405	0.935064	0.026	0.0685051	0.0813333	0.537225	0.0301667	47	25	47188.6	59.3
O75746	O75746	SLC25A12	Mitochondria	-0.149	0.074	-0.045	-0.03	0.152	-0.058	0.083	0.021	-0.089	0.062	-0.067	-0.0325	0.940308	0.0613333	0.62238	0.045	0.80956	-0.0175	28	21	75159.9	36.1
O75771	O75771	RAD51D	General	0.04	-0.091	-0.099	0.003	-0.056	0.107	0.127	0.11	0.033	0.053	-0.05	-0.0305	0.900478	0.068	0.0550028	0.14	0.0816856	-0.0991667	8	6	35334	28.6
O75781	O75781	PALM	General	0.076	0.181	0.048	0.029	0.143	-0.031	-0.256	-0.428	-0.565	0.039	0.089	0.0595	0.920863	-0.0546667	0.00306673	-0.518	0.0013676	0.478833	24	19	42246.4	43.6
O75787	O75787	ATP6AP2	ER membrane	-0.121	-0.01	0.027	0.016	0.048	-0.089	0.177	0.026	-0.006	-0.086	0.07	-0.0535	0.966475	0.0263333	0.225971	0.100333	0.25453	-0.0888333	22	15	39007.3	42.5
O75792	O75792	RNASEH2A	General	0.05	0.003	0.039	0.077	0.019	0.007	-0.03	-0.043	-0.116	-0.038	-0.023	0.0175	0.996126	0.00366667	0.0649846	-0.0936667	0.289193	0.0485	39	23	33736.6	72.2
O75794	O75794	CDC123	General	0.044	-0.037	0.007	0.002	-0.084	-0.07	0.015	0.141	0.045	0.009	-0.071	0.0105	0.881235	-0.0553333	0.275844	0.0623333	0.14469	-0.0841667	43	20	39590.5	61.9
O75808	O75808	CAPN15	General	0.043	-0.011	0.007	-0.029	-0.079	-0.042	0	0.065	-0.062	-0.058	-0.039	-0.0605	0.810012	-0.063	0.827332	-0.012	0.279755	-0.0535	17	16	119936	18.5
O75815	O75815	BCAR3	General	-0.006	-0.002	0.008	-0.031	-0.024	-0.144	0.789	0.938	0.914	-0.031	-0.09	-0.0505	0.851781	-0.0663333	3.94e-05	0.880333	9.07e-06	-0.9375	54	44	93533.8	64.8
O75817	O75817	POP7	General	-0.072	-0.047	-0.016	-0.006	-0.022	0.02	0.105	0.115	0.266	-0.033	-0.042	-0.0785	0.882873	0.0423333	0.0151031	0.207	0.00833199	-0.213167	17	7	15764.7	44.2
O75818	O75818	RPP40	General	0.026	-0.075	-0.184	-0.102	-0.06	0.009	0.005	-0.009	-0.034	0.106	0.166	0.0855	0.972557	0.0266667	0.365641	0.065	0.0138085	0.131833	32	18	42460.8	55.6
O75820	O75820	ZNF189	General	-0.04	0.015	-0.052	-0.024	0.052	0.159	-0.139	-0.135	0.162	0.074	0.092	0.0465	0.85009	0.088	0.921486	-0.0116667	0.282712	0.108167	5	10	75085.3	12.1
O75821	O75821	EIF3G	General	0.007	0.003	0.062	0.045	-0.031	0.024	-0.053	-0.011	0.014	-0.081	-0.088	-0.0175	0.982205	-0.0113333	0.349949	-0.0406667	0.308028	-0.0455	95	30	35895.6	77.8
O75822	O75822-3	EIF3J	General	-0.01	-0.062	0.006	0.01	-0.015	-0.002	-0.071	-0.018	-0.015	-0.052	-0.059	-0.0105	0.948255	0.0196667	0.778481	-0.0126667	0.895217	-0.00583333	3	20	29176	87
O75822	O75822	EIF3J	General	-0.006	-0.026	0.015	-0.014	-0.005	-0.003	0.025	0.012	-0.04	-0.008	-0.022	0.0275	0.997735	-0.00166667	0.915983	0.00466667	0.997488	0.000166667	77	29	23140.3	81.7
O75828	O75828	CBR3	Mitochondria	0.102	-0.014	0.092	0.026	0.032	-0.02	-0.034	-0.016	-0.089	-0.099	-0.075	-0.0145	0.901243	-0.0473333	0.0799502	-0.106333	0.73305	-0.0165	23	18	31249.1	66.7
O75832	O75832	PSMD10	General	0.151	0.01	0.012	0.092	0.04	0.021	-0.234	-0.17	-0.258	0.065	-0.031	0.1395	0.994022	-0.00666667	0.00482296	-0.278333	0.00288626	0.2785	47	15	24712.7	71.6
O75843	O75843	AP1G2	General	-0.014	-0.03	0.01	0.042	0.077	0.086	-0.145	-0.07	-0.166	0.058	0.044	0.0145	0.693269	0.0796667	0.0351347	-0.115667	0.00704053	0.165833	21	21	87970.8	26.4
O75844	O75844	ZMPSTE24	ER membrane	-0.059	-0.039	-0.041	0.028	0.134	0.018	-0.052	-0.203	-0.309	0.099	0.179	0.1065	0.71177	0.106333	0.112903	-0.141667	0.0052039	0.316167	41	19	55097.1	33.8
O75845	O75845	SC5D	ER membrane	-0.196	-0.058	-0.031	-0.001	0.064	-0.039	0.209	0.202	-0.049	-0.003	0.209	0.0305	0.82075	0.103	0.0699419	0.215667	0.703155	-0.0418333	5	4	35414.2	9
O75864	O75864	PPP1R37	General	0.06	-0.032	-0.07	-0.044	-0.007	0.062	-0.085	-0.104	-0.14	0.099	0.065	0.0195	0.975527	0.0176667	0.101139	-0.0956667	0.00499162	0.170833	13	12	75450.7	20.5
O75865	O75865-2	TRAPPC6A	Endoplasmic Reticulum	0.253	-0.001	-0.051	-0.038	0.004	0.056	-0.036	-0.101	-0.089	0.106	0.148	0.0155	0.943506	-0.0596667	0.187216	-0.142333	0.0139689	0.165167	5	4	19102.8	22.5
O75874	O75874	IDH1	General	0.05	-0.027	0.016	0.09	0.017	0.006	-0.088	-0.067	-0.058	-0.007	-0.046	0.0275	0.948255	0.0246667	0.067382	-0.084	0.140769	0.0625	101	36	46943.7	78.7
O75879	O75879	GATB	Mitochondria	-0.01	0.036	-0.053	-0.027	0.009	-0.099	0.255	0.215	0.181	-0.074	-0.022	-0.0435	0.943258	-0.03	0.00342089	0.226	0.000627705	-0.2635	25	19	62319.4	48.2
O75880	O75880	SCO1	Mitochondria	-0.16	0.148	0.089	-0.009	0.091	-0.18	0.237	0.22	0.158	-0.178	-0.295	-0.2435	0.957287	-0.0583333	0.111494	0.179333	0.000146593	-0.443833	13	11	34041.6	30.8
O75882	O75882	ATRN	General	-0.01	-0.034	-0.17	0	0.053	-0.004	0.063	-0.034	-0.065	0.063	0.096	-0.0015	0.831386	0.0876667	0.415926	0.0593333	0.260177	0.0645	9	9	163555	6.3
O75884	O75884	RBBP9	General	0.172	0.013	0.017	-0.033	0.028	-0.01	-0.133	-0.141	-0.2	0.087	0.009	0.0965	0.885527	-0.0723333	0.0120893	-0.225333	0.00231036	0.222167	12	9	21227.8	68.8
O75886	O75886	STAM2	General	0.06	-0.03	-0.013	0.109	0.063	0.077	-0.268	-0.241	-0.23	0.097	0.043	0.0845	0.805167	0.0773333	0.00179772	-0.252	0.00017598	0.321167	23	19	58562.6	42
O75891	O75891-3	ALDH1L1	Mitochondria	0.162	0.206	0.088	-0.16	-0.086	-0.181	0.389	0.358	0.334	-0.153	-0.184	-0.1695	0.161821	-0.294333	0.00602601	0.208333	1.86e-05	-0.529167	5	3	100607	2.4
O75896	O75896	TUSC2	General	-0.054	-0.035	-0.087	0	0.066	0.014	-0.093	-0.117	0.002	0.126	0.041	0.0875	0.720536	0.0853333	0.845359	-0.0106667	0.0184046	0.154167	6	4	12073.6	51.8
O75901	O75901	RASSF9	General	-0.014	0.024	0.022	0.02	-0.111	-0.115	0.038	0.204	0.34	-0.244	-0.253	-0.1805	0.831386	-0.0793333	0.0831038	0.183333	0.00244582	-0.419833	3	3	50419.1	8.7
O75909	O75909	CCNK	General	-0.049	-0.048	-0.197	-0.051	0.009	0.027	0.061	0.017	-0.042	0.047	0.176	0.0085	0.826544	0.093	0.126157	0.11	0.316879	0.0651667	21	16	64637.9	32.2
O75911	O75911	DHRS3	General	-0.102	0.01	-0.028	-0.001	0.056	0.029	0.051	0.011	0.017	0.026	0.028	0.0385	0.83313	0.068	0.189607	0.0663333	0.909385	0.0045	12	9	33947.2	45.3
O75915	O75915	ARL6IP5	ER membrane	-0.057	0.005	0.012	0.019	0.127	0.113	-0.075	-0.132	-0.201	0.082	0.166	0.0185	0.77479	0.0996667	0.050622	-0.122667	0.00746557	0.224833	15	9	21614.3	34
O75920	O75920-2	SERF1A	General	0.054	-0.09	-0.033	-0.016	-0.047	-0.012	0.022	0.055	-0.045	-0.063	0.059	0.0295	0.997735	-0.002	0.589922	0.0336667	0.970509	-0.00216667	4	3	7336.3	33.8
O75923	O75923-13	DYSF	General	0.071	-0.336	-0.524	-0.338	0.254	-0.145	0.317	-0.056	-0.137	0.125	0.06	0.0835	0.921586	0.186667	0.204982	0.304333	0.73305	0.0481667	3	7	243519	3.1
O75925	O75925-2	PIAS1	General	0.115	-0.049	-0.055	-0.006	-0.027	0.017	-0.056	-0.086	-0.089	0.028	0.056	0.0335	0.989839	-0.009	0.23814	-0.0806667	0.0127583	0.116167	22	18	73172.1	38.8
O75928	O75928	PIAS2	General	-0.017	0.016	-0.074	-0.053	-0.009	0.004	0.121	0.124	0.101	0.023	0.017	-0.0225	0.991219	0.00566667	0.014071	0.140333	0.0177215	-0.1095	14	15	69209.2	26.7
O75934	O75934	BCAS2	General	-0.013	-0.024	0.001	-0.002	-0.073	-0.002	0.066	0.082	0.151	-0.068	-0.066	-0.0315	0.972557	-0.0136667	0.0315385	0.111667	0.00787522	-0.154833	60	20	26245.1	92.4
O75935	O75935	DCTN3	General	0.156	-0.032	-0.088	-0.037	0.02	-0.011	-0.023	-0.045	-0.117	0.038	0.066	0.0825	0.982599	-0.0213333	0.402998	-0.0736667	0.0223056	0.123833	23	14	21233.1	66.6
O75937	O75937	DNAJC8	General	0.085	0.019	0.053	0.09	-0.066	0.096	-0.095	-0.106	-0.121	-0.041	-0.022	0.0415	0.9867	-0.0123333	0.0060253	-0.159667	0.038329	0.100167	61	26	29841.1	73.1
O75940	O75940	SMNDC1	General	-0.02	-0.008	0.061	-0.012	-0.078	-0.029	0.079	0.072	0.171	-0.157	-0.035	-0.0415	0.885527	-0.0506667	0.0948656	0.0963333	0.0126844	-0.185167	35	14	26881.8	57.9
O75947	O75947	ATP5H	Mitochondria	-0.045	0.081	-0.097	0.052	0.068	-0.003	0.078	-0.066	0.047	-0.019	-0.059	-0.0065	0.901243	0.0593333	0.6117	0.04	0.389812	-0.0478333	48	17	18547.9	86.3
O75952	O75952	CABYR	General	-0.066	-0.033	0.007	-0.026	-0.059	0.053	-0.015	-0.081	0.047	-0.04	-0.008	-0.0035	0.966475	0.02	0.800826	0.0143333	0.988167	-0.000833333	4	3	52944.2	10.3
O75953	O75953-5	DNAJB5	General	0.128	0.005	-0.028	-0.01	-0.051	0.02	-0.109	0.049	0.03	0.034	-0.039	-0.0225	0.916764	-0.0486667	0.564767	-0.045	0.990419	0.000833333	11	10	51973.2	24.6
O75955	O75955	FLOT1	General	-0.047	0.045	-0.021	-0.005	0.03	-0.104	0.158	0.043	0.029	-0.012	0.011	0.0145	0.972912	-0.0186667	0.177802	0.0843333	0.177269	-0.0721667	71	36	47582.7	83.1
O75962	O75962	TRIO	General	0.079	0.018	-0.003	-0.048	0.007	-0.016	-0.048	-0.043	-0.077	0.05	0.037	0.0495	0.881235	-0.0503333	0.0680298	-0.0873333	0.0204722	0.1015	126	96	349975	35.2
O75964	O75964	ATP5L	Mitochondria	-0.007	-0.034	-0.287	-0.003	0.093	-0.034	0.056	-0.08	-0.006	0.135	0.117	0.0665	0.869992	0.128	0.349318	0.0993333	0.0528824	0.116167	21	8	11428.3	59.2
O75969	O75969	AKAP3	General	-0.02	-0.107	0.105	0.108	-0.084	-0.196	-0.067	0.203	0.405	-0.24	-0.095	-0.1905	0.958621	-0.05	0.243338	0.187667	0.028048	-0.3555	4	3	95491.1	4.4
O75971	O75971	SNAPC5	General	-0.004	-0.054	0.107	0.055	0.013	-0.05	0.083	0.15	0.13	-0.171	-0.048	-0.1865	0.98803	-0.0103333	0.115552	0.104667	0.00268999	-0.256167	5	5	11328.3	48.9
O75976	O75976	CPD	General	-0.02	0.024	-0.01	0.016	0.032	0.013	0.034	-0.013	-0.041	-0.022	0.029	-0.0335	0.937011	0.0223333	0.918451	-0.00466667	0.962719	-0.00216667	85	52	154012	39
O76003	O76003	GLRX3	General	0.035	-0.033	0.046	0.023	-0.029	-0.007	-0.007	0.059	0.023	-0.054	-0.078	-0.0085	0.952379	-0.0203333	0.852312	0.009	0.116008	-0.0718333	63	24	37716.6	71.6
O76021	O76021	RSL1D1	General	-0.028	0.045	0.001	0.013	-0.007	0.083	-0.035	-0.053	-0.031	0.018	0.112	0.0235	0.949297	0.0236667	0.262781	-0.0456667	0.0662906	0.0908333	118	55	55199.7	68.5
O76024	O76024	WFS1	ER membrane	-0.178	-0.115	-0.082	-0.032	0.036	0.001	0.21	0.13	0.133	0.049	0.073	-0.0015	0.584955	0.126667	0.00193337	0.282667	0.0316279	-0.1175	39	27	101431	30.2
O76027	O76027	ANXA9	General	0.091	0.113	0.095	0.083	0.012	0.032	-0.62	-0.555	-0.56	0.021	-0.055	-0.0275	0.82075	-0.0573333	2.93e-05	-0.678	2.79e-05	0.557833	6	5	38591.1	22.6
O76031	O76031	CLPX	Mitochondria	-0.005	0.032	-0.1	-0.033	0.004	-0.05	0.231	0.168	0.256	0.008	-0.079	-0.0285	0.997735	-0.002	0.00575455	0.242667	0.00144312	-0.2515	84	40	69964.2	70.7
O76039	O76039	CDKL5	General	-0.019	0.031	-0.081	-0.018	-0.007	0.131	-0.192	-0.145	-0.031	0.096	0.064	0.0885	0.903368	0.0583333	0.159551	-0.0996667	0.00735453	0.2055	12	13	116220	13.3
O76054	O76054	SEC14L2	General	0.068	-0.034	0.017	-0.066	0.056	0.03	-0.125	-0.028	0.004	0.092	-0.12	0.0225	0.9867	-0.0103333	0.272495	-0.0666667	0.538416	0.0478333	6	5	46657.9	12.4
O76064	O76064	RNF8	General	0.015	0.028	-0.043	-0.097	-0.054	0.033	0.073	0.045	0.073	0.021	-0.022	-0.0385	0.922258	-0.0393333	0.139326	0.0636667	0.0725132	-0.0768333	9	8	56372.4	20.2
O76070	O76070	SNCG	General	0.096	-0.013	0.074	0.112	0.014	0.02	-0.118	-0.145	-0.199	-0.04	-0.074	0.1045	0.997735	-0.00366667	0.00737815	-0.206333	0.042177	0.150833	42	13	13330.6	92.9
O76071	O76071	CIAO1	General	0.021	0	0.041	-0.011	-0.005	-0.028	0.002	0.097	0.057	-0.061	-0.09	0.0385	0.886235	-0.0353333	0.487632	0.0313333	0.129492	-0.0895	35	20	38866.3	78.1
O76076	O76076	WISP2	General	0.028	0.002	0.094	0.043	0.028	0.065	-0.032	-0.198	-0.345	-0.089	0.051	0.1045	0.996126	0.004	0.0485079	-0.233	0.064887	0.213833	5	4	28479.2	20.8
O76080	O76080	ZFAND5	General	0.006	-0.018	0.06	0.032	-0.006	-0.014	0.028	0.009	0.087	-0.094	-0.101	-0.0115	0.977806	-0.012	0.594093	0.0253333	0.0455524	-0.110167	14	9	23759.3	52.1
O76081	O76081	RGS20	General	0.014	-0.038	0.045	-0.042	-0.016	-0.179	0.311	0.402	0.314	-0.136	0.025	-0.0185	0.851781	-0.086	0.000986644	0.335333	0.000685046	-0.3855	2	2	44318.7	5.1
O76082	O76082-3	SLC22A5	General	-0.127	0.141	-0.042	0.017	0.267	0.021	-0.117	-0.206	-0.393	0.201	0.273	0.0275	0.900608	0.111	0.0841999	-0.229333	0.00597053	0.405833	5	4	65782	8.4
O76094	O76094	SRP72	Endoplasmic Reticulum	0.022	-0.028	-0.004	0.04	-0.019	-0.013	0.014	0.02	0.013	-0.062	0.012	0.0475	0.988047	0.006	0.602648	0.019	0.729615	-0.0165	108	48	75175.4	72.8
O77932	O77932	DXO	General	0.106	0.05	-0.05	-0.091	0.048	0.049	-0.14	-0.169	-0.209	0.2	0.171	0.0505	0.95599	-0.0333333	0.0116362	-0.208	0.00119598	0.313167	8	8	45384.5	19.9
O94760	O94760	DDAH1	General	0.134	0.09	0.209	0.151	0.082	0.012	-0.365	-0.362	-0.462	-0.063	-0.093	-0.0415	0.886515	-0.0626667	0.000256589	-0.540667	0.000406346	0.3305	41	18	31463.6	67.7
O94761	O94761	RECQL4	Mitochondria	-0.001	-0.001	-0.027	0.005	-0.071	0.084	-0.04	0.017	0.005	-0.076	-0.043	-0.0625	0.977806	0.0156667	0.929516	0.00366667	0.176882	-0.0545	25	22	135072	21.6
O94762	O94762	RECQL5	General	0.001	0.001	0.007	0.015	-0.048	0.005	-0.01	0.032	0.039	-0.044	0.009	-0.0235	0.972569	-0.0123333	0.639362	0.0173333	0.322916	-0.0398333	65	43	110568	48.6
O94763	O94763-4	URI1	General	0.035	-0.032	0.071	-0.089	-0.1	0.152	-0.12	0.02	-0.14	0.16	0.007	-0.1555	0.966475	-0.037	0.146433	-0.104667	0.416583	0.0838333	4	22	60287.6	46.5
O94763	O94763	URI1	General	0.043	0.002	0.1	0.041	-0.022	-0.015	0.021	-0.007	-0.044	-0.087	-0.052	0.0225	0.886515	-0.047	0.235147	-0.0583333	0.562786	-0.0288333	32	25	53902.6	54.9
O94766	O94766	B3GAT3	General	-0.117	-0.012	-0.072	-0.006	0.011	-0.062	0.167	0.204	0.147	0.046	-0.043	-0.0385	0.890021	0.048	0.00291312	0.239667	0.00484476	-0.1845	9	8	37292.3	26.8
O94768	O94768	STK17B	General	-0.001	-0.065	0.008	0.03	-0.113	-0.075	0.076	0.153	0.074	0.087	-0.084	-0.1225	0.943258	-0.0333333	0.0365312	0.120333	0.0762946	-0.140833	4	3	42913.8	9.6
O94776	O94776	MTA2	General	0.004	-0.001	0.025	-0.021	-0.067	-0.019	0.061	0.05	0.175	-0.088	-0.021	-0.0485	0.863756	-0.045	0.127043	0.086	0.0222843	-0.147833	125	61	75763.5	76.3
O94782	O94782	USP1	General	0.11	0.045	0.074	0.006	-0.006	0.007	-0.086	-0.057	-0.094	-0.07	0.05	0.0085	0.750948	-0.074	0.00715945	-0.155333	0.139578	0.0751667	38	26	89232.6	34.6
O94788	O94788	ALDH1A2	General	-0.193	-0.028	-0.307	-0.145	-0.084	-0.01	0.001	-0.016	0.244	0.168	-0.005	-0.1545	0.886515	0.0963333	0.0686728	0.252333	0.553007	-0.0735	4	8	57179.3	10.8
O94804	O94804	STK10	General	-0.014	-0.039	0.001	0.015	-0.038	-0.029	0.101	0.082	0.065	-0.01	-0.023	0.0375	1	0	0.0261755	0.1	0.0634741	-0.0811667	75	54	112818	51.7
O94806	O94806	PRKD3	General	0.08	0.061	0.017	-0.029	-0.026	0.005	-0.075	-0.077	-0.102	0.046	0.026	0.0155	0.805167	-0.0693333	0.0105811	-0.137333	0.0133759	0.113833	32	25	101838	36.5
O94808	O94808	GFPT2	General	0.056	-0.047	-0.005	-0.041	-0.014	-0.071	0.19	0.154	0.015	0.032	-0.048	-0.0025	0.896546	-0.0433333	0.117169	0.118333	0.0720025	-0.125833	24	26	77728	40.6
O94811	O94811	TPPP	General	0.14	0.077	0.148	0.166	0.014	0.099	-0.568	-0.498	-0.579	0.016	-0.08	0.0465	0.952379	-0.0286667	5.42e-05	-0.67	7.36e-05	0.5425	6	6	23864.4	24.2
O94817	O94817	ATG12	General	-0.009	-0.168	-0.006	-0.03	-0.076	-0.137	0.125	0.128	-0.003	-0.075	-0.02	-0.0375	0.977806	-0.02	0.0897202	0.144333	0.0417084	-0.1275	9	7	15227.1	61.4
O94822	O94822-3	LTN1	General	0.033	-0.021	-0.02	-0.037	-0.02	0.002	0.011	-0.009	-0.069	0.054	0.023	0.0295	0.964939	-0.0156667	0.668289	-0.0196667	0.181487	0.0578333	74	52	207912	29.8
O94826	O94826	TOMM70	Mito signal-anchored	-0.142	0.02	-0.026	0.071	0.049	-0.085	0.273	0.114	0.144	-0.101	-0.065	-0.0435	0.916525	0.061	0.0208304	0.226333	0.00387544	-0.246833	108	42	68138.3	72.6
O94829	O94829	IPO13	General	0.018	-0.087	-0.165	-0.002	0.037	0.04	0.044	0	0.082	0.037	-0.038	-0.0625	0.815969	0.103	0.102075	0.12	0.211935	-0.0631667	18	16	109391	23.6
O94830	O94830	DDHD2	General	0.086	-0.017	0.001	0.008	0.043	0.1	-0.115	-0.054	-0.159	0.105	0.056	0.0285	0.948255	0.027	0.0425014	-0.132667	0.0083382	0.1725	21	18	81715	35.4
O94842	O94842	TOX4	General	0.054	0.012	-0.03	0.015	0.033	0.053	-0.118	-0.103	0.006	-0.007	-0.007	0.0325	0.948255	0.0216667	0.163188	-0.0836667	0.147438	0.0778333	28	16	66593	28.5
O94844	O94844	RHOBTB1	General	0.115	0.017	-0.022	-0.014	0.019	0.062	-0.14	-0.148	-0.135	0.043	0.034	0.0475	0.982599	-0.0143333	0.0127993	-0.177667	0.00141956	0.1825	10	10	80556.8	15.9
O94851	O94851	MICAL2	General	0.032	0.064	-0.016	-0.114	-0.024	-0.072	0.368	0.259	0.319	-0.091	-0.09	-0.0575	0.740195	-0.0966667	0.00186351	0.288667	0.000149785	-0.394833	5	8	128170	6.3
O94855	O94855-2	SEC24D	Endoplasmic Reticulum	-0.009	-0.048	-0.051	-0.003	0.014	-0.008	-0.068	-0.009	-0.031	0.07	0.077	0.0585	0.886082	0.037	1	-6.94e-18	0.023123	0.1045	54	37	114619	43
O94864	O94864	SUPT7L	General	-0.02	-0.008	-0.005	-0.042	-0.084	-0.014	-0.035	0.122	0.17	0.032	-0.011	0.0275	0.895252	-0.0356667	0.192565	0.0966667	0.312524	-0.0695	10	8	46591.3	18.5
O94874	O94874	UFL1	Endoplasmic Reticulum	0.004	-0.004	-0.029	-0.027	-0.011	0.024	0.024	-0.024	-0.014	0.041	0.097	0.0135	0.989839	0.005	0.90141	0.005	0.215444	0.0551667	86	47	90050.1	58.3
O94875	O94875-11	SORBS2	General	-0.063	-0.009	-0.033	0.237	0.126	0.228	-0.812	-0.917	-0.867	0.123	0.182	0.0785	0.194717	0.232	2.88e-05	-0.830333	5.03e-06	0.993167	34	25	135790	22.1
O94876	O94876	TMCC1	ER membrane	-0.057	-0.004	0.035	0.012	0.015	-0.058	0.044	0.092	0.169	-0.066	0.003	-0.0275	0.997839	-0.00166667	0.0782058	0.110333	0.0296935	-0.131833	6	5	72481.1	11
O94885	O94885	SASH1	General	-0.134	0.029	-0.162	-0.276	0.335	0.011	0.322	-0.048	-0.19	0.297	0.174	0.0175	0.943258	0.112333	0.49606	0.117	0.413762	0.134833	4	4	137735	2.6
O94886	O94886	TMEM63A	General	-0.007	0.084	0.001	0.152	0.075	-0.049	-0.042	-0.082	-0.259	0.023	0.147	-0.0505	0.956543	0.0333333	0.0857293	-0.153667	0.0813225	0.1675	8	8	93607.9	8.6
O94887	O94887	FARP2	General	-0.012	-0.08	-0.088	-0.097	-0.029	0.038	0.054	-0.018	0.096	-0.002	0.001	-0.0105	0.944801	0.0306667	0.0780086	0.104	0.307639	-0.0478333	13	12	120799	15.7
O94888	O94888	UBXN7	Endoplasmic Reticulum	0.026	0.048	0.059	0.042	0.012	0.001	-0.106	-0.014	-0.065	-0.1	-0.003	-0.0435	0.920863	-0.026	0.0400693	-0.106	0.808736	0.0128333	48	28	55260.7	53.9
O94889	O94889	KLHL18	General	0.063	-0.011	0.048	-0.05	0.059	-0.178	0.239	0.16	0.077	-0.001	-0.036	-0.0155	0.885527	-0.0896667	0.0716103	0.125333	0.0133012	-0.176167	5	5	64892.5	8.1
O94898	O94898	LRIG2	General	-0.01	0.021	-0.06	-0.061	-0.035	-0.012	0.333	0.233	0.144	0.103	0.264	-0.0905	0.953496	-0.0196667	0.00919428	0.253	0.211917	-0.1445	9	5	120389	4.2
O94901	O94901-9	SUN1	General	-0.27	-0.089	0.036	0.08	0.061	-0.054	0.223	-0.004	-0.047	0.052	-0.013	-0.0155	0.851781	0.136667	0.215529	0.165	0.579618	-0.0495	32	24	102843	31.9
O94903	O94903	PLPBP	Mitochondria	-0.001	-0.044	0.016	0.043	0.016	-0.041	-0.005	0.046	0.047	-0.054	-0.075	-0.0405	0.972381	0.0156667	0.351566	0.039	0.0504356	-0.0858333	26	15	30628.6	54.9
O94905	O94905	ERLIN2	ER membrane	-0.022	0.003	0.001	-0.025	-0.018	-0.023	0.112	0.082	0.018	-0.068	0.026	-0.0345	0.950865	-0.016	0.106619	0.0766667	0.076932	-0.0961667	46	23	38067.1	69
O94906	O94906	PRPF6	General	-0.018	-0.044	-0.026	-0.021	-0.082	0.06	0.05	0.038	0.095	-0.032	0.023	0.0045	0.977806	0.015	0.0430272	0.0903333	0.143677	-0.0625	151	81	107722	73
O94907	O94907	DKK1	General	0.137	-0.027	0.079	-0.071	-0.163	-0.403	0.144	0.437	0.244	-0.408	-0.006	-0.3035	0.649813	-0.275333	0.0723841	0.212	0.00719571	-0.514167	3	3	29812.2	12.4
O94910	O94910	ADGRL1	Endoplasmic Reticulum	0.007	0.062	0.05	-0.059	-0.108	-0.091	0.103	0.01	-0.001	-0.127	-0.048	-0.1385	0.443878	-0.125667	0.965729	-0.00233333	0.025055	-0.141833	7	7	164711	6.5
O94913	O94913	PCF11	General	-0.034	-0.04	-0.003	-0.014	-0.073	-0.011	0.181	0.202	0.226	-0.109	-0.022	-0.0225	0.9867	-0.007	0.00129336	0.228667	0.00102327	-0.254167	76	51	173732	38
O94915	O94915	FRYL	General	-0.023	-0.087	-0.051	-0.047	-0.014	-0.003	0.13	0.088	0.042	0.062	0.058	-0.0175	0.909186	0.0323333	0.0178109	0.140333	0.281977	-0.0525	78	65	342387	23.5
O94916	O94916-5	NFAT5	General	-0.008	-0.004	-0.042	0.02	-0.036	-0.017	0.054	0.107	0.091	-0.107	-0.021	-0.0735	0.9867	0.007	0.0297591	0.102	0.00919854	-0.151167	18	17	168775	15.8
O94919	O94919	ENDOD1	General	-0.023	0.03	0.126	0.065	0.059	-0.08	-0.002	-0.087	-0.146	-0.102	-0.056	-0.0685	0.966475	-0.0296667	0.104296	-0.122667	0.960221	0.00283333	13	10	55757.3	32.8
O94923	O94923	GLCE	General	-0.041	0.005	-0.04	0.07	0.119	0.005	-0.135	-0.082	-0.044	0.058	0.048	0.0625	0.802894	0.09	0.189273	-0.0616667	0.00990076	0.143167	17	13	70442	24.3
O94925	O94925-3	GLS	Mitochondria	0.042	0.027	-0.207	-0.044	0.054	-0.089	0.012	0.059	0.126	-0.018	0.025	0.0215	0.986252	0.0196667	0.250327	0.111667	0.249332	-0.0561667	8	24	74315.6	50.6
O94925	O94925	GLS	Mitochondria	-0.021	-0.017	-0.197	-0.039	0.012	-0.057	0.204	0.197	0.252	0.063	0.018	-0.0135	0.926588	0.0503333	0.00575455	0.296	0.00277172	-0.195167	53	27	66257.6	50.6
O94927	O94927	HAUS5	General	0.006	-0.075	-0.044	-0.056	0.04	-0.013	0.007	0.029	-0.017	0.082	0.022	0.0125	0.943258	0.028	0.311497	0.044	0.440331	0.0325	32	27	72308.8	46.1
O94941	O94941	UBOX5	General	0.044	-0.039	0.076	0.031	-0.105	-0.028	0.061	0.081	0.153	-0.111	-0.144	-0.0845	0.886515	-0.061	0.21562	0.0713333	0.00254095	-0.2115	4	4	60105.7	13.1
O94952	O94952	FBXO21	General	0.081	0.052	0.058	-0.037	-0.019	0.026	-0.186	-0.116	-0.356	0.096	0.086	0.0185	0.774459	-0.0736667	0.0106857	-0.283	0.00688192	0.286167	14	13	73181.6	25.1
O94955	O94955	RHOBTB3	General	-0.011	0.005	-0.113	-0.036	0.011	-0.019	0.12	0.131	0.089	0.07	0.05	0.0425	0.950865	0.025	0.0199355	0.153	0.130541	-0.0591667	7	6	70724.4	10.9
O94964	O94964-2	SOGA1	General	0.008	0.007	0.022	0.064	0.035	0.095	-0.143	-0.126	-0.131	0.036	0.033	0.0245	0.826544	0.0523333	0.0048593	-0.145667	0.00230096	0.1645	91	71	185623	43.5
O94966	O94966-6	USP19	ER tail-anchored	-0.005	-0.037	-0.026	0.019	0.02	0.004	-0.056	-0.011	-0.048	0.062	0.032	0.0495	0.885527	0.037	0.679118	-0.0156667	0.0438791	0.0861667	93	63	153862	57.5
O94967	O94967-4	WDR47	General	0.15	-0.019	0.022	0.034	0.028	0.074	-0.164	-0.152	-0.169	0.03	-0.06	0.0275	0.996126	-0.00566667	0.0115001	-0.212667	0.00723221	0.160833	16	12	104479	18.5
O94972	O94972	TRIM37	General	0.05	0.015	0	0	0.006	0.006	-0.033	-0.061	-0.051	0.012	-0.029	-0.0115	0.948255	-0.0176667	0.0857293	-0.07	0.299427	0.0388333	16	13	109558	15.4
O94973	O94973	AP2A2	General	-0.019	-0.042	-0.076	-0.013	-0.052	-0.034	0.236	0.219	0.239	0.021	0.021	-0.0065	0.972557	0.0126667	0.000581185	0.277	0.000702727	-0.2195	54	47	104871	58.2
O94985	O94985	CLSTN1	ER membrane	-0.014	-0.008	0.012	0.095	0.108	-0.043	-0.064	-0.177	-0.013	0.057	0.088	0.0425	0.891276	0.0566667	0.191604	-0.0813333	0.030329	0.147167	11	10	111046	12.2
O94986	O94986	CEP152	General	-0.005	-0.031	-0.001	0.029	-0.068	0.025	-0.009	-0.001	0.044	-0.035	-0.064	0.0085	0.98803	0.00766667	0.536169	0.0236667	0.332899	-0.0415	46	41	198019	25.6
O94988	O94988	FAM13A	General	0.112	0.069	0.044	0.069	-0.014	0.087	-0.212	-0.168	-0.334	-0.007	-0.073	0.0645	0.943857	-0.0276667	0.00305988	-0.313	0.00944977	0.232833	7	6	117671	7.5
O94989	O94989	ARHGEF15	General	0.322	-0.021	-0.648	-0.384	0.147	0.359	-0.417	-0.864	-1.092	0.558	0.186	0.3325	0.961705	0.156333	0.0846908	-0.675333	0.00119898	1.14983	5	3	92908.3	2.9
O94991	O94991	SLITRK5	General	0.019	0.04	-0.007	-0.012	0.014	-0.137	0.133	0.051	0.201	-0.139	-0.147	-0.0025	0.886082	-0.0623333	0.0779644	0.111	0.011101	-0.2245	3	3	108739	3
O94992	O94992	HEXIM1	General	0.001	0.022	0.041	-0.004	-0.031	0.004	-0.038	0.044	0.086	-0.115	-0.095	-0.1045	0.901243	-0.0316667	0.862925	0.00933333	0.0211546	-0.1355	40	21	40908	47.6
O95025	O95025	SEMA3D	General	0.12	-0.1	-0.215	-0.16	-0.16	0.074	-0.09	-0.101	-0.024	0.111	-0.042	0.0885	0.991082	-0.017	0.954251	-0.00666667	0.0624739	0.124167	4	4	90790.8	7.9
O95049	O95049	TJP3	General	0.112	0.221	0.303	0.132	-0.005	0.082	-0.46	-0.471	-0.357	-0.145	-0.108	-0.0575	0.802894	-0.142333	0.000347908	-0.641333	0.000714279	0.325833	19	16	101509	19.9
O95059	O95059	RPP14	General	-0.039	-0.194	-0.269	-0.201	-0.078	0.011	0.166	0.182	0.069	0.222	0.268	0.0625	0.917654	0.078	0.00962312	0.306333	0.554131	0.0451667	9	6	13921	65.3
O95067	O95067	CCNB2	General	-0.02	-0.065	-0.048	-0.075	0.011	-0.037	0.2	0.236	0.147	0.057	-0.027	0.0005	0.982599	0.0106667	0.00212358	0.238667	0.00560065	-0.184167	30	21	45566	53.5
O95070	O95070	YIF1A	ER membrane	0.067	-0.182	-0.226	-0.097	-0.007	-0.062	-0.008	0.037	-0.014	0.119	0.042	0.0685	0.943258	0.0583333	0.247924	0.118667	0.116635	0.0715	4	2	32067.6	10.9
O95071	O95071	UBR5	General	-0.014	-0.008	0.002	-0.017	-0.037	-0.005	0.019	0.023	0.033	-0.044	0.023	0.0075	0.966475	-0.013	0.347936	0.0316667	0.458694	-0.0295	195	124	312542	48
O95081	O95081	AGFG2	General	0.018	0.039	0.094	0.006	0.021	-0.022	-0.122	-0.001	-0.089	0.01	-0.066	-0.0115	0.879966	-0.0486667	0.0531148	-0.121	0.36239	0.0481667	26	13	49361.5	31.3
O95084	O95084	PRSS23	Endoplasmic Reticulum	0.133	0.073	0.106	0.086	0.069	-0.022	-0.178	-0.221	-0.269	-0.041	0.065	-0.0205	0.874032	-0.0596667	0.000699288	-0.326667	0.00338731	0.223833	20	14	43513.9	49.8
O95104	O95104	SCAF4	General	0.044	0.05	0.019	-0.035	-0.053	0.024	-0.016	-0.027	-0.012	-0.021	0.021	-0.0235	0.824408	-0.059	0.126461	-0.056	0.789152	0.0105	32	25	126209	24.4
O95139	O95139	NDUFB6	Mitochondria	-0.105	0.021	-0.147	-0.002	0.142	0.023	-0.065	-0.01	-0.083	0.035	0	0.0155	0.805167	0.131333	0.717764	0.0243333	0.111579	0.0695	25	10	15488.9	53.9
O95140	O95140	MFN2	Outer mitochondrial membrane	-0.024	-0.08	-0.107	-0.054	-0.055	-0.058	0.064	0.089	0.123	0.069	0.091	0.0865	0.968804	0.0146667	0.00952741	0.162333	0.810525	-0.00983333	50	32	87142.3	46.1
O95147	O95147	DUSP14	General	-0.035	0.062	-0.099	-0.013	-0.098	0.106	-0.067	0.146	0.031	0.029	-0.088	0.0635	0.980458	0.0223333	0.481362	0.0606667	0.668194	-0.0351667	5	4	22482.8	42.4
O95149	O95149	SNUPN	General	0.093	-0.076	-0.068	-0.028	-0.025	-0.083	0.041	0.07	0.012	0.06	-0.005	0.0315	0.961705	-0.0283333	0.393661	0.058	0.781138	-0.0121667	18	12	41598.2	37.7
O95155	O95155-4	UBE4B	General	0.037	0.034	0.004	-0.014	0.017	0.009	-0.056	-0.03	-0.086	0.051	0.063	-0.0195	0.940308	-0.021	0.0583179	-0.0823333	0.0688182	0.0888333	85	52	152985	46.8
O95158	O95158	NXPH4	General	0.004	0.039	0.08	0.164	0.126	0.136	-0.193	-0.289	-0.253	-0.058	0.077	0.0065	0.628784	0.101	0.00155319	-0.286	0.00280231	0.2535	3	3	33406.9	9.7
O95159	O95159	ZFPL1	General	-0.001	0.06	-0.047	-0.008	-0.042	-0.02	0.04	0.027	-0.031	0.067	0.146	-0.0105	0.940308	-0.0273333	0.883159	0.008	0.341738	0.0555	12	9	34855.1	32.5
O95163	O95163	ELP1	General	0.003	-0.052	-0.006	0.064	0.05	0.02	-0.074	-0.063	-0.161	0.064	0.059	0.0765	0.808018	0.063	0.120144	-0.081	0.00690494	0.165833	113	65	151906	56.6
O95166	O95166	GABARAP	General	0.059	-0.021	0.02	0.065	-0.025	0.025	-0.07	-0.036	-0.134	-0.003	-0.025	0.0305	0.997735	0.00233333	0.0736615	-0.0993333	0.100567	0.0808333	9	5	13917.8	24.7
O95167	O95167	NDUFA3	Mitochondria	-0.016	0.113	-0.05	0.075	0.067	-0.003	0.145	-0.026	-0.012	-0.131	-0.114	-0.0325	0.952379	0.0306667	0.817051	0.02	0.0804317	-0.128167	11	4	9278.7	57.1
O95168	O95168	NDUFB4	Mitochondria	0.01	0.029	-0.076	0.037	0.033	-0.112	0.057	-0.035	0.001	-0.028	-0.013	0.0195	0.99832	-0.00166667	0.720305	0.02	0.749409	-0.0148333	10	7	15265.4	47.2
O95169	O95169	NDUFB8	Mitochondria	-0.096	0.118	0.048	-0.012	0.019	-0.197	0.3	0.114	0.159	-0.294	-0.279	-0.2045	0.903623	-0.0866667	0.0951294	0.167667	0.000463281	-0.450167	11	8	21879.5	44.6
O95171	O95171	SCEL	General	0.088	-0.145	-0.004	-0.151	0.057	-0.117	0.108	0.073	0.402	0.053	0.072	-0.1845	0.950865	-0.05	0.125085	0.214667	0.114681	-0.214167	4	4	78063.9	6.3
O95178	O95178	NDUFB2	Mitochondria	0.034	0.157	0.12	-0.019	0.021	-0.117	0.302	0.026	0.015	-0.077	-0.173	-0.1815	0.693269	-0.142	0.927429	0.0106667	0.0270873	-0.258167	4	3	12115.3	19
O95180	O95180	CACNA1H	General	-0.047	0.06	0.058	0.077	-0.109	-0.071	0.043	0.131	0.171	-0.192	-0.097	-0.0775	0.920152	-0.058	0.161508	0.0913333	0.00466816	-0.237167	10	5	262353	2.4
O95182	O95182	NDUFA7	Mitochondria	0.039	0.108	0.069	-0.036	-0.153	-0.137	0.303	0.263	0.282	-0.356	-0.318	-0.1765	0.390375	-0.180667	0.00241515	0.210667	0.000109861	-0.566167	19	12	12608.2	82.3
O95197	O95197	RTN3	ER membrane	-0.091	0.004	0.015	0.023	0.011	0.04	0.01	-0.02	-0.018	-0.009	0.076	-0.0145	0.886515	0.0486667	0.771773	0.0146667	0.557379	0.0268333	25	17	113237	24.5
O95201	O95201	ZNF205	General	-0.049	0.287	-0.394	-0.024	-0.002	0.026	-0.027	-0.618	-0.565	0.173	0.112	0.1075	0.982599	0.052	0.224651	-0.351333	0.0163388	0.534167	5	3	61826.9	4.3
O95202	O95202	LETM1	Mitochondria	-0.122	0.013	-0.248	-0.025	0.085	-0.129	0.378	0.195	0.198	0.033	0.026	-0.0905	0.900478	0.096	0.00969171	0.376	0.00804136	-0.2675	76	42	84037.3	56
O95210	O95210	STBD1	ER signal-anchored	-0.056	0.009	0.015	-0.019	0.041	0.016	0.128	-0.04	-0.003	0.034	0.054	0.0205	0.944801	0.0233333	0.556079	0.039	0.902706	0.00783333	22	18	39234.8	55
O95218	O95218	ZRANB2	General	0.04	0.058	0.137	0.075	-0.057	0.006	-0.019	-0.047	-0.037	-0.132	-0.062	0.0125	0.874032	-0.0703333	0.037374	-0.112667	0.627667	-0.0261667	45	18	37860.2	46.9
O95219	O95219	SNX4	General	0.154	0.056	0.031	-0.029	0.005	0.022	-0.121	-0.047	-0.151	0.062	0.065	0.0525	0.815969	-0.081	0.0162988	-0.186667	0.00671502	0.166167	16	14	52193.2	35.7
O95229	O95229	ZWINT	General	-0.014	0.017	0.083	0.041	0.019	-0.001	-0.032	0.005	-0.02	-0.014	-0.097	-0.0225	0.986142	-0.009	0.333589	-0.0443333	0.513755	-0.0288333	20	12	31349.9	48.3
O95232	O95232	LUC7L3	General	-0.013	-0.03	-0.043	0.023	-0.005	0.014	0.016	0.035	0.062	-0.01	0.01	0.0445	0.880682	0.0393333	0.0956504	0.0663333	0.571203	-0.0228333	94	40	51864.7	64.5
O95235	O95235	KIF20A	General	-0.005	-0.038	-0.001	-0.034	-0.085	-0.049	0.409	0.427	0.43	-0.065	-0.007	-0.0225	0.885527	-0.0413333	8.58e-05	0.436667	3.37e-05	-0.4535	76	47	101303	64.6
O95239	O95239	KIF4A	General	-0.008	-0.03	0.01	0.014	-0.035	0.029	-0.011	0	-0.005	-0.064	0.003	0.0225	0.972912	0.012	0.916379	0.004	0.869085	-0.0075	154	76	141476	64.5
O95243	O95243-2	MBD4	General	-0.02	-0.012	-0.03	-0.032	-0.026	0.002	0.084	0.049	0.115	0.006	0.026	0.0555	0.997735	0.002	0.0283317	0.103333	0.203506	-0.0535	29	26	66145.7	51.7
O95248	O95248-4	SBF1	General	-0.01	0.005	0.019	0.004	0.008	0.015	-0.033	-0.039	0.006	-0.048	-0.004	0.0125	0.989996	0.00433333	0.471874	-0.0266667	0.838872	0.00883333	65	52	213156	30.6
O95251	O95251	KAT7	General	-0.006	-0.01	-0.055	-0.009	-0.028	0.071	0.006	0.059	0	0.055	0.135	0.0175	0.920152	0.035	0.279416	0.0453333	0.347881	0.0475	33	23	71325.8	37.8
O95260	O95260-2	ATE1	General	-0.009	-0.001	0.014	0.02	0.002	-0.009	-0.068	-0.019	-0.049	0.017	-0.014	-0.0205	0.996126	0.003	0.215312	-0.0466667	0.309602	0.0395	32	24	60000.9	51.5
O95263	O95263	PDE8B	General	0.05	0.056	0.032	0.068	-0.026	0.018	-0.131	-0.082	-0.1	0.008	-0.004	0.0735	0.940308	-0.026	0.00602601	-0.150333	0.0155428	0.130167	46	36	100518	50.1
O95271	O95271	TNKS	General	-0.025	-0.002	0.029	-0.007	-0.082	0.003	0.063	0.01	0.106	-0.055	-0.087	-0.0605	0.937011	-0.0293333	0.215775	0.059	0.018429	-0.127167	14	12	143806	11.6
O95273	O95273	CCNDBP1	General	-0.08	-0.092	-0.002	-0.076	0.006	-0.045	0.22	0.167	0.174	0.019	-0.01	-0.0255	0.966475	0.0196667	0.00239252	0.245	0.00200273	-0.1925	14	10	40660.7	35.5
O95274	O95274	LYPD3	General	-0.106	0.135	0.08	0.073	0.13	-0.042	-0.206	-0.307	-0.242	-0.022	0.176	0.0655	0.9867	0.0173333	0.0132754	-0.288	0.00230096	0.324833	30	13	37054.1	41.3
O95292	O95292	VAPB	ER tail-anchored	-0.063	0.009	0.057	0.13	0.038	0.029	0.027	-0.091	-0.048	-0.036	0.07	0.0255	0.885527	0.0646667	0.524292	-0.0383333	0.303988	0.0571667	41	16	27456.1	56.3
O95295	O95295	SNAPIN	General	0.052	0.015	0.069	0.111	-0.033	0.037	-0.191	-0.124	-0.027	-0.006	-0.034	0.0735	0.991219	-0.007	0.0310881	-0.159333	0.0712854	0.125167	18	9	14930.8	68.3
O95297	O95297	MPZL1	General	-0.117	0.062	0.024	-0.024	0.026	-0.165	0.17	-0.058	0.002	-0.046	0.021	-0.0205	0.94848	-0.044	0.617664	0.0483333	0.479748	-0.0531667	11	8	29252.8	21.1
O95298	O95298	NDUFC2	Mitochondria	-0.07	0.07	-0.056	-0.01	0.08	-0.029	0.176	0.09	0.035	-0.11	-0.099	-0.0515	0.950865	0.0323333	0.113396	0.119	0.008801	-0.187167	14	7	14244.3	41.1
O95302	O95302	FKBP9	Endoplasmic Reticulum	0	-0.019	0.014	-0.015	-0.063	-0.017	0.12	0.024	0.066	-0.142	-0.032	-0.0555	0.911368	-0.03	0.128937	0.0716667	0.0220231	-0.1465	46	23	63538.8	44.7
O95336	O95336	PGLS	Endoplasmic Reticulum	0.096	-0.038	0.033	0.034	0.029	0.042	-0.137	-0.088	-0.163	0.029	-0.054	0.0265	0.996126	0.00466667	0.0229977	-0.159667	0.0226478	0.129833	54	17	27831.6	94.5
O95340	O95340	PAPSS2	General	0.053	-0.017	0	0.063	0.058	0.077	-0.324	-0.281	-0.327	0.089	0.085	0.0845	0.831386	0.054	0.000510521	-0.322667	5.29e-05	0.396833	126	51	70070	74.2
O95347	O95347	SMC2	General	0.061	0.016	0.057	0.06	-0.005	0.003	-0.055	-0.038	-0.035	-0.051	-0.023	0.0235	0.940308	-0.0253333	0.0417664	-0.0873333	0.529418	0.0258333	209	93	136167	67.5
O95352	O95352	ATG7	General	-0.018	-0.059	0.001	-0.015	0.006	-0.047	0.16	0.234	0.103	0.01	-0.017	-0.0555	0.98803	0.00666667	0.0103881	0.191	0.007786	-0.1865	56	36	79099.3	56.1
O95361	O95361	TRIM16	General	0.087	-0.001	0.006	0.034	0.026	0.031	-0.427	-0.376	-0.511	0.116	0.105	0.1025	0.998591	-0.000333333	0.00045759	-0.468667	4.89e-05	0.545833	50	32	64923.9	63.1
O95363	O95363	FARS2	Mitochondria	-0.011	0.006	-0.118	-0.086	0.025	-0.047	0.177	0.097	0.127	0.075	0.021	0.0015	0.997353	0.005	0.0173684	0.174667	0.0482794	-0.101167	23	17	52697.9	35
O95365	O95365	ZBTB7A	General	-0.038	0.004	0.037	0.014	-0.104	-0.004	0.059	0.026	0.143	-0.129	-0.032	-0.0585	0.940308	-0.0323333	0.176811	0.075	0.0224982	-0.149167	26	18	62236.8	38.8
O95372	O95372	LYPLA2	General	0.079	0.017	0.088	0.079	0.068	-0.004	-0.155	-0.099	-0.207	0.012	-0.042	0.0315	0.977691	-0.0136667	0.00551607	-0.215	0.013517	0.154167	25	10	25078.9	54.1
O95373	O95373	IPO7	General	0.003	-0.066	-0.111	-0.088	0.009	-0.004	0.139	0.169	0.011	0.094	0.035	-0.0145	0.944801	0.0303333	0.0413346	0.164333	0.290385	-0.0681667	164	62	120827	60.9
O95376	O95376	ARIH2	General	0.018	0	0.014	0.027	0.01	-0.009	-0.1	0.172	0.018	-0.001	-0.072	0.0445	0.997735	-0.00133333	0.832541	0.0193333	0.66009	-0.0395	26	19	59415.4	49.6
O95379	O95379	TNFAIP8	General	0.02	-0.033	-0.072	-0.017	0.05	0.071	-0.148	-0.124	-0.237	0.178	0.114	0.0955	0.855978	0.063	0.0335923	-0.141333	0.00093885	0.298833	14	11	23174.2	51
O95382	O95382	MAP3K6	General	0.044	0.001	-0.038	-0.031	0.015	0.072	0.065	0.064	0.051	0	-0.041	-0.0865	0.972912	0.0163333	0.177337	0.0576667	0.0342082	-0.1025	17	13	144305	14.5
O95391	O95391	SLU7	General	-0.019	-0.028	0.009	-0.018	-0.098	-0.023	0.094	0.089	0.131	-0.094	-0.003	-0.0205	0.916487	-0.0336667	0.0159918	0.117333	0.0120401	-0.143833	55	35	68841.9	65.5
O95394	O95394-3	PGM3	General	0.034	-0.029	-0.006	0.017	0.018	-0.019	-0.043	-0.028	-0.058	0.033	-0.032	0.0515	0.989245	0.00566667	0.279486	-0.0426667	0.168946	0.0605	67	31	62796.9	65.1
O95396	O95396	MOCS3	General	0	0	0.05	0.019	-0.005	-0.025	0.03	0.076	0.027	-0.058	-0.053	-0.0815	0.945266	-0.0203333	0.495544	0.0276667	0.0200851	-0.1085	28	23	50581.2	63.9
O95400	O95400	CD2BP2	General	-0.034	-0.058	0.016	0.007	-0.072	-0.033	0.071	0.086	0.111	-0.079	-0.06	-0.0365	0.98803	-0.00733333	0.025378	0.114667	0.00526523	-0.147833	33	19	37759.9	58.3
O95402	O95402	MED26	General	-0.073	-0.011	-0.005	-0.011	-0.018	0.029	0.016	0.026	0.05	-0.018	-0.022	-0.0045	0.921857	0.0296667	0.159686	0.0603333	0.217729	-0.0455	18	14	65901.7	29.6
O95405	O95405	ZFYVE9	General	0.004	0.04	0.009	0.036	-0.038	0.031	-0.08	-0.014	-0.005	-0.01	-0.044	-0.0205	0.9867	-0.008	0.242981	-0.0506667	0.855887	0.00816667	12	11	159025	8.4
O95409	O95409	ZIC2	General	-0.097	0.076	-0.016	-0.031	-0.054	-0.047	0.015	0.055	0.049	-0.026	0.079	0.0215	0.948255	-0.0316667	0.406184	0.052	0.757352	-0.0148333	8	6	55632.5	12.2
O95425	O95425-4	SVIL	General	-0.028	-0.007	-0.021	0.04	0.018	0.053	-0.106	-0.089	-0.033	0.014	0.116	0.0735	0.805259	0.0556667	0.172526	-0.0573333	0.0166896	0.143833	78	66	246287	37.7
O95428	O95428	PAPLN	General	0.034	-0.028	0.039	0.103	0.055	0.058	-0.511	-0.599	-0.816	0.075	-0.025	0.0695	0.83313	0.057	0.000999992	-0.657	0.00034285	0.681833	7	4	141691	3.8
O95429	O95429	BAG4	General	-0.033	0.049	0.077	0.007	0.027	0.063	-0.071	-0.028	-0.041	-0.129	-0.014	-0.0555	0.99832	0.00133333	0.132883	-0.0776667	0.696244	-0.0195	6	6	49821.4	12.9
O95433	O95433	AHSA1	Endoplasmic Reticulum	0.054	-0.112	-0.09	-0.006	0.016	0.018	-0.083	-0.032	-0.098	0.084	0.042	0.0935	0.89568	0.0586667	0.750747	-0.0216667	0.00902216	0.144167	88	31	38444.8	80.7
O95453	O95453	PARN	General	0.031	-0.02	-0.002	-0.029	-0.064	-0.022	0.059	0.06	0.063	-0.052	0.007	0.0485	0.885527	-0.0413333	0.132165	0.0576667	0.187564	-0.0595	70	39	73963.1	50.3
O95455	O95455	TGDS	General	0.07	0.051	0.017	-0.052	-0.067	-0.011	0.333	0.363	0.259	-0.01	-0.089	0.0455	0.66549	-0.0893333	0.00176807	0.272333	0.000852049	-0.336167	3	3	40555.5	8.5
O95456	O95456	PSMG1	Endoplasmic Reticulum	0.049	-0.053	-0.018	-0.077	-0.024	-0.011	0.091	0.034	-0.064	0.07	0.089	-0.0125	0.940308	-0.03	0.674581	0.0276667	0.654798	0.0285	41	20	33652.1	65.2
O95466	O95466-2	FMNL1	General	-0.008	0.003	-0.005	0.066	0.07	0.006	-0.112	-0.131	-0.129	0.064	0.067	0.0345	0.848487	0.0506667	0.009759	-0.120667	0.00183189	0.179167	65	43	123092	39.4
O95470	O95470	SGPL1	ER signal-anchored	-0.14	-0.113	-0.049	0.06	0.039	0.02	0.085	0.004	0	0.033	0.095	0.0005	0.44674	0.140333	0.0344299	0.130333	0.804597	0.0131667	27	22	64093.2	44.3
O95477	O95477	ABCA1	General	0.036	-0.103	-0.005	-0.059	-0.143	0.01	0.09	0.113	0.161	0.037	0.026	0.0015	0.943258	-0.04	0.0350029	0.145333	0.0344502	-0.0998333	3	3	256523	1.3
O95478	O95478	NSA2	General	-0.016	0.051	0.029	0.04	-0.064	0.05	-0.073	-0.092	0.03	-0.097	0.018	-0.0175	0.985612	-0.0126667	0.236824	-0.0663333	0.837968	0.0128333	40	18	30236.1	56.9
O95486	O95486	SEC24A	Endoplasmic Reticulum	-0.034	0	-0.013	-0.035	0.022	-0.037	0.116	0.159	0.106	-0.018	-0.065	-0.0525	0.99832	-0.001	0.00843878	0.142667	0.00337105	-0.172167	33	22	120546	22.2
O95487	O95487-3	SEC24B	Endoplasmic Reticulum	-0.017	-0.008	0.001	-0.017	0.007	0.004	-0.033	0.019	-0.053	0.025	0.009	0.0465	0.9867	0.006	0.728291	-0.0143333	0.239928	0.0491667	61	35	141617	34.2
O95502	O95502	NPTXR	General	-0.052	-0.049	-0.005	-0.036	0.029	-0.147	0.331	0.015	0.111	-0.096	0.076	-0.0565	0.982599	-0.016	0.0929788	0.187667	0.11102	-0.177833	5	3	53301.7	4.4
O95503	O95503	CBX6	General	0.007	0.005	-0.148	-0.113	-0.001	0.04	-0.013	-0.058	-0.143	0.203	0.181	0.0405	0.980458	0.0206667	0.731987	-0.026	0.0135971	0.212833	4	5	44125.7	9.7
O95544	O95544	NADK	General	0.133	0.076	0.117	0.075	0.04	0.024	-0.195	-0.276	-0.296	-0.022	-0.071	0.0235	0.815969	-0.0623333	0.000562818	-0.364333	0.00275911	0.2325	16	12	49912	28.4
O95551	O95551	TDP2	General	0.014	-0.01	-0.033	-0.003	-0.03	-0.062	0.061	0.14	0.112	-0.039	-0.057	-0.0155	0.943258	-0.022	0.0290087	0.114	0.0100324	-0.1415	19	12	41613.5	43.3
O95563	O95563	MPC2	Mitochondria	-0.048	0.077	-0.2	-0.013	0.146	-0.011	-0.023	-0.089	-0.212	0.249	0.168	0.1155	0.895252	0.0976667	0.632711	-0.051	0.00479062	0.2855	9	5	14335.7	33
O95568	O95568	METTL18	General	-0.034	0.002	0.023	-0.059	0.014	0.057	0.092	0.105	0.049	-0.036	-0.094	-0.0285	0.989839	0.007	0.0642951	0.085	0.0125941	-0.134833	16	13	42489.7	44.6
O95571	O95571	ETHE1	Mitochondria	0.02	0.035	0.016	-0.024	-0.006	-0.156	0.368	0.301	0.343	-0.149	-0.116	-0.1045	0.82075	-0.0856667	0.000418958	0.313667	4.15e-05	-0.4605	32	18	28385.9	75.5
O95573	O95573	ACSL3	ER signal-anchored	-0.109	0.002	0.01	0.023	-0.023	-0.042	0.246	0.196	0.167	-0.12	-0.046	-0.0855	0.972569	0.0183333	0.00564236	0.235333	0.000586851	-0.286833	84	41	81388.6	64.1
O95602	O95602	POLR1A	General	-0.005	-0.01	-0.034	-0.015	-0.01	-0.002	-0.007	0.001	-0.028	-0.006	0.097	0.0205	0.985852	0.00733333	0.894763	0.005	0.292865	0.0485	167	99	196805	67.2
O95613	O95613	PCNT	General	0.01	0.065	0.074	0.07	0.02	0.071	-0.138	-0.17	-0.178	0.005	0.03	0.0025	0.996126	0.004	0.00242078	-0.211667	0.00233789	0.1745	90	81	380826	25.3
O95619	O95619	YEATS4	General	0.104	-0.002	-0.043	0.005	-0.004	0.135	-0.095	-0.103	-0.142	0.107	0.117	0.0735	0.971904	0.0256667	0.0465433	-0.133	0.00116765	0.2125	21	13	26556.1	56.8
O95620	O95620	DUS4L	General	-0.026	0.108	-0.098	-0.043	0.075	-0.105	-0.021	0.147	0.214	0.023	-0.118	0.0745	0.985852	-0.019	0.24698	0.118667	0.197646	-0.120167	2	2	36557.6	7.2
O95622	O95622	ADCY5	General	-0.011	0.068	0.079	0.232	-0.326	0.195	-0.195	-0.122	0.225	0.008	-0.114	-0.1685	0.997735	-0.0116667	0.590424	-0.076	0.661323	-0.0608333	3	6	140845	4.9
O95625	O95625	ZBTB11	General	-0.016	-0.007	0.01	-0.029	-0.073	-0.012	0.159	0.128	0.252	-0.109	-0.006	-0.0425	0.901243	-0.0336667	0.00960452	0.184	0.00410421	-0.232167	33	28	121492	27.1
O95628	O95628-6	CNOT4	General	0.054	-0.007	0.011	0.077	-0.007	-0.037	-0.04	-0.03	-0.041	-0.028	-0.03	0.0385	0.98803	-0.00833333	0.155709	-0.0563333	0.454261	0.0305	24	20	85658	27.9
O95630	O95630	STAMBP	General	0.068	-0.002	0.046	0.089	0.016	0.072	-0.089	-0.07	-0.119	0.003	-0.017	0.0495	0.950865	0.0216667	0.0165059	-0.13	0.0304212	0.1045	35	19	48646.6	41.7
O95633	O95633	FSTL3	Endoplasmic Reticulum	0.092	0.134	0.151	0.059	-0.071	-0.002	-0.106	-0.161	-0.095	-0.058	0.094	0.0595	0.63643	-0.130333	0.00163725	-0.246333	0.0266577	0.1525	10	8	29146.4	32.3
O95639	O95639	CPSF4	General	-0.03	0.057	0.027	0.023	-0.073	0.008	-0.004	-0.01	0.061	-0.109	-0.025	-0.0695	0.940308	-0.032	0.964114	-0.00233333	0.0927615	-0.0835	24	14	31281.2	61.7
O95671	O95671	ASMTL	General	0.069	-0.073	0.026	-0.042	-0.071	-0.103	0.359	0.43	0.313	-0.081	-0.118	0.0055	0.831386	-0.0793333	0.00183276	0.36	0.000278267	-0.431833	37	21	69597.2	39.9
O95672	O95672	ECEL1	General	-0.101	0.087	0.052	0.14	0.202	0.033	-0.296	-0.451	-0.536	0.071	0.204	-0.0005	0.848763	0.112333	0.00441343	-0.440333	0.00100907	0.519167	37	24	88588.3	33.6
O95674	O95674	CDS2	ER membrane	-0.129	0.013	0.001	-0.059	0.023	-0.012	0.1	0.02	-0.039	0.012	0.219	0.0165	0.969979	0.0223333	0.357226	0.0653333	0.500246	0.0555	3	3	51987.5	11.6
O95677	O95677-2	EYA4	General	0.062	0.043	-0.029	0.018	0.025	0.017	-0.167	-0.157	-0.129	0.082	0.135	0.0475	0.991219	-0.00533333	0.00707388	-0.176333	0.00107969	0.239167	14	10	67463.5	21.5
O95684	O95684	FGFR1OP	General	-0.012	-0.049	-0.05	0.074	0.022	0.02	-0.112	-0.101	-0.071	0.085	0.02	0.0905	0.753741	0.0756667	0.143055	-0.0576667	0.00585942	0.159833	15	10	43178.2	40.1
O95685	O95685	PPP1R3D	General	0.022	0.033	0.098	0.059	-0.007	0.002	-0.207	-0.057	-0.134	0.084	-0.04	0.0165	0.921259	-0.033	0.0179131	-0.183667	0.0346762	0.152833	10	8	33300.2	36.4
O95696	O95696-2	BRD1	General	-0.051	-0.009	0.004	-0.003	-0.037	-0.004	0.023	0.008	0.108	0.002	0.058	-0.0275	0.994172	0.004	0.198154	0.065	0.488478	-0.0355	49	40	135466	31.8
O95707	O95707	POP4	General	-0.047	0.002	-0.088	-0.073	0.009	0.074	0.078	0.045	0.044	0.098	0.152	0.0405	0.91589	0.0476667	0.0482126	0.1	0.381655	0.0411667	17	10	25595.4	51.3
O95714	O95714	HERC2	General	0.036	0.01	0.007	0.011	0.02	0.021	-0.062	-0.063	-0.095	0.032	0.047	0.0175	0.998591	-0.000333333	0.034354	-0.091	0.0189784	0.1055	180	134	533837	33.2
O95716	O95716	RAB3D	Endoplasmic Reticulum	-0.161	-0.014	-0.056	-0.049	0.01	-0.101	0.338	0.129	0.083	-0.025	0.009	-0.0685	0.952379	0.0303333	0.0290218	0.260333	0.0300376	-0.2115	16	12	24494.9	60.7
O95721	O95721	SNAP29	Mitochondria	0.04	0.031	0.073	0.145	0.031	0.009	-0.15	-0.145	-0.176	0.012	0.012	0.0425	0.982686	0.0136667	0.00182856	-0.205	0.00198866	0.179167	34	19	28969.8	76.3
O95747	O95747	OXSR1	General	0.018	-0.032	0.017	-0.034	-0.006	-0.023	0.133	0.091	0.017	-0.023	-0.064	-0.0125	0.940308	-0.022	0.138048	0.0793333	0.0416566	-0.1135	64	28	58306.4	51.4
O95749	O95749	GGPS1	General	-0.035	-0.067	0.03	0.064	-0.017	-0.014	0.072	0.089	0.02	-0.027	-0.064	-0.0015	0.933154	0.035	0.108117	0.0843333	0.0563616	-0.0911667	20	13	35041.4	43.3
O95757	O95757	HSPA4L	Endoplasmic Reticulum	0.015	-0.023	0.033	0.052	-0.013	-0.015	-0.008	0	-0.006	-0.054	-0.043	-0.0075	0.998591	-0.000333333	0.734299	-0.013	0.417344	-0.0301667	190	80	95537.8	85.8
O95777	O95777	LSM8	General	0.017	0.018	0.08	0.018	-0.004	0.019	0.008	0.009	0.019	-0.069	-0.063	-0.0355	0.924508	-0.0273333	0.504966	-0.0263333	0.0814321	-0.0678333	19	8	10402.5	98.9
O95782	O95782	AP2A1	General	0.027	0.033	0.009	0.034	0.029	0.013	-0.115	-0.113	-0.119	0.046	0.105	0.0605	0.997535	0.00233333	0.00590881	-0.138667	0.00197902	0.186167	125	58	108628	64.4
O95785	O95785	WIZ	General	0.02	-0.067	-0.074	-0.063	-0.033	0.052	0.101	0.038	-0.155	0.125	0.076	0.0285	0.955362	0.0256667	0.708767	0.035	0.330754	0.0818333	4	35	180326	22.5
O95786	O95786	DDX58	General	0.143	0.017	0.134	-0.105	-0.079	-0.213	1.269	1.379	1.35	0.028	-0.156	0.0085	0.390375	-0.230333	2.35e-05	1.23467	4.61e-06	-1.3725	21	20	108081	21.4
O95789	O95789	ZMYM6	General	-0.005	-0.002	-0.044	0.001	0.011	-0.005	0.098	0.152	0.107	-0.031	-0.034	-0.0435	0.944641	0.0193333	0.0114614	0.136	0.00429605	-0.155167	20	16	151852	15.8
O95793	O95793	STAU1	Endoplasmic Reticulum	-0.024	-0.008	-0.037	0.07	0.008	0.052	-0.094	-0.058	-0.037	0.063	0.065	0.0505	0.805167	0.0663333	0.298116	-0.04	0.0118492	0.1225	39	26	63466.4	45.2
O95801	O95801	TTC4	General	0.013	-0.064	0.052	0.027	-0.007	-0.013	0.01	0.017	-0.001	-0.06	-0.046	0.0085	0.997735	0.002	0.870787	0.00833333	0.306764	-0.0411667	35	23	45191.2	67.1
O95810	O95810	CAVIN2	General	0.025	0.095	-0.1	-0.063	-0.032	-0.018	0.111	0.052	0.091	-0.061	0.031	-0.0825	0.937011	-0.0443333	0.269418	0.078	0.0345172	-0.122167	5	5	47229.4	13.6
O95816	O95816	BAG2	General	-0.005	-0.017	0.017	0.088	-0.012	0.016	-0.052	-0.034	-0.021	-0.026	0.03	-0.0235	0.921857	0.0323333	0.343941	-0.034	0.462353	0.0291667	66	22	23942.7	78.1
O95817	O95817	BAG3	General	-0.039	-0.035	0.029	0.017	-0.013	-0.011	0.019	0.042	0.047	-0.015	-0.038	-0.0045	0.972912	0.0126667	0.224228	0.051	0.148081	-0.0551667	101	39	61764.7	77.7
O95819	O95819-3	MAP4K4	General	-0.002	0.02	-0.037	-0.037	-0.01	-0.013	0.04	0.025	-0.012	0.036	0.02	0.0265	0.966493	-0.0136667	0.551798	0.024	0.80553	0.00983333	105	66	151796	42.5
O95819	O95819-6	MAP4K4	General	-0.022	0.012	0.037	-0.012	0.022	0.023	0.004	0.057	0.062	-0.105	-0.183	-0.0015	0.997735	0.002	0.446603	0.032	0.0489996	-0.1375	4	61	145687	40.3
O95822	O95822	MLYCD	Mitochondria	-0.096	-0.042	-0.204	-0.066	0.027	-0.035	0.125	0.174	0.157	0.103	0.033	-0.0175	0.83313	0.0893333	0.00468379	0.266	0.0437604	-0.1125	16	14	55401.8	33.4
O95825	O95825	CRYZL1	General	0.193	0.084	0.146	0.126	0.02	0.11	-0.264	-0.3	-0.331	-0.022	-0.046	0.0445	0.886515	-0.0556667	0.000312478	-0.439333	0.000616972	0.2905	34	19	39095.2	70.2
O95831	O95831	AIFM1	Mitochondria	-0.052	0.08	0.011	0.064	0.129	-0.004	-0.093	-0.136	-0.209	0.001	-0.02	0.0795	0.919471	0.05	0.0325795	-0.159	0.01478	0.166167	101	34	67184.7	56.9
O95833	O95833	CLIC3	Endoplasmic Reticulum	0.083	0.035	0.036	0.153	0.098	0.115	-1.123	-1.119	-1.135	0.084	0.03	0.0085	0.805167	0.0706667	6.23e-06	-1.177	1.22e-06	1.1665	31	19	26933.3	88.1
O95834	O95834-3	EML2	General	0.081	0.05	0.117	0.135	0.084	0.093	-0.297	-0.352	-0.453	-0.049	-0.015	-0.0425	0.947382	0.0213333	0.000568048	-0.45	0.000762353	0.331833	68	34	93380.4	42.5
O95835	O95835	LATS1	Endoplasmic Reticulum	0.054	-0.013	0.004	-0.02	0.002	-0.006	0.015	-0.009	0	0.017	-0.032	0.0055	0.940308	-0.023	0.749906	-0.013	0.899472	-0.00516667	30	23	127381	19.9
O95857	O95857	TSPAN13	General	-0.033	0.072	0.093	0.115	0.046	-0.042	-0.087	-0.109	-0.154	-0.113	0.02	-0.0405	0.997735	-0.00433333	0.0213788	-0.160667	0.18514	0.0721667	4	3	22831.4	14.2
O95861	O95861	BPNT1	General	0.101	-0.038	0.046	0.09	0.035	-0.014	-0.13	-0.077	-0.168	-0.004	-0.048	0.0745	0.998591	0.000666667	0.0268489	-0.161333	0.0336822	0.1325	47	24	33734	77.2
O95863	O95863	SNAI1	General	-0.137	0.099	0.04	0.024	-0.095	0.011	-0.011	0.087	0.213	-0.096	-0.016	0.0545	0.985852	-0.0206667	0.360866	0.0956667	0.164685	-0.1155	6	5	29710.1	17
O95865	O95865	DDAH2	General	0.006	0.054	0.112	0.106	0.047	0.012	-0.136	-0.112	-0.089	-0.052	-0.09	-0.0455	0.997735	-0.00233333	0.0100027	-0.169667	0.211099	0.0498333	22	15	29928.6	76.4
O95873	O95873	C6orf47	General	-0.196	-0.027	-0.016	-0.03	0.145	0.01	0.182	0.186	0.109	0.039	-0.094	-0.1305	0.831386	0.121333	0.0137125	0.238667	0.00855023	-0.220833	5	4	31880.5	11.9
O95876	O95876	WDPCP	General	0.105	-0.072	-0.152	-0.052	-0.022	0.059	-0.172	-0.211	-0.003	0.252	-0.022	0.0805	0.966475	0.0346667	0.408044	-0.089	0.0429497	0.232167	3	3	86223.2	3.3
O95881	O95881	TXNDC12	Endoplasmic Reticulum	-0.005	0.022	-0.012	0.012	-0.111	-0.001	0.249	0.278	0.382	-0.122	-0.083	-0.0615	0.936563	-0.035	0.00182577	0.301333	0.00030582	-0.391833	30	12	19376.6	74.4
O95886	O95886	DLGAP3	General	0.015	0.03	-0.548	-0.044	0.047	0.034	-0.441	-0.351	-0.751	0.151	-0.014	0.0865	0.901243	0.18	0.156578	-0.346667	0.00233969	0.588833	4	4	107008	4.4
O95897	O95897	OLFM2	Endoplasmic Reticulum	0.22	0.109	0.111	0.278	0.081	0.176	-0.211	-0.38	-0.138	-0.051	0.172	0.1735	0.963397	0.0316667	0.00468379	-0.389667	0.0101989	0.341167	3	3	51784.8	11.2
O95900	O95900	TRUB2	Mitochondria	0.015	0.052	0.005	-0.044	-0.006	-0.079	0.071	0.111	0.23	0.027	-0.079	-0.0285	0.808644	-0.067	0.0883566	0.113333	0.0273217	-0.164167	31	21	36979.1	77.9
O95905	O95905-3	ECD	General	0.039	-0.044	-0.077	-0.033	-0.001	-0.008	-0.048	0.032	-0.022	0.016	0.004	0.0625	0.977806	0.0133333	0.793872	0.0146667	0.365845	0.0401667	48	27	77191.6	50.9
O95926	O95926	SYF2	General	0.031	-0.063	-0.003	-0.02	-0.093	0.001	0.089	0.013	0	-0.111	0.048	0.0055	0.949297	-0.0256667	0.381775	0.0456667	0.391453	-0.0531667	23	14	28778.9	59.2
O95980	O95980	RECK	General	-0.105	0.075	0.056	-0.019	0.047	-0.069	-0.042	-0.067	-0.044	-0.116	0.056	0.0005	0.974342	-0.0223333	0.381573	-0.0596667	0.60552	0.0311667	12	10	111533	14.1
O95983	O95983	MBD3	General	0.02	0.014	0.033	-0.003	-0.054	0.004	-0.004	0.007	0.074	-0.127	-0.074	-0.0895	0.886082	-0.04	0.940753	0.00333333	0.020851	-0.1225	37	22	33071.7	58.4
O95985	O95985	TOP3B	General	-0.008	-0.012	-0.021	0.017	-0.018	-0.008	-0.033	0.003	-0.016	-0.004	0.011	0.0375	0.972912	0.0106667	0.964625	-0.00166667	0.424846	0.0301667	59	39	98600.1	57
O95989	O95989	NUDT3	General	0.101	-0.01	-0.005	-0.047	-0.021	-0.167	0.1	0.187	0.089	-0.031	-0.134	-0.0655	0.815969	-0.107	0.122786	0.0966667	0.00580515	-0.202167	8	12	19641.8	53.4
O95990	O95990-4	FAM107A	General	0.087	-0.018	0.022	0.027	-0.074	-0.056	0.622	0.646	0.496	-0.028	-0.075	0.0125	0.880682	-0.0646667	0.00035574	0.557667	6.13e-05	-0.618167	4	3	20928.6	12.5
O95994	O95994	AGR2	Endoplasmic Reticulum	-0.113	-0.093	-0.199	0.281	0.206	0.255	-0.695	-0.733	-0.683	0.245	0.324	0.2195	0.0631806	0.382333	0.000103663	-0.568667	3.79e-06	0.9665	24	11	20035.9	66.2
O95995	O95995	GAS8	General	0.017	-0.043	-0.007	0.013	-0.011	-0.012	-0.054	-0.044	0.144	-0.057	-0.059	-0.0555	0.985852	0.00766667	0.737329	0.0263333	0.298797	-0.0725	10	9	56468.7	18.8
O95996	O95996	APC2	General	-0.068	-0.188	-0.146	-0.248	0.119	-0.061	-0.098	-0.132	-0.367	0.438	0.216	0.0595	0.940308	0.0706667	0.514289	-0.065	0.0109965	0.436833	2	3	246112	2.3
O95997	O95997	PTTG1	General	0.04	-0.009	0.04	-0.038	-0.12	-0.014	0.159	0.202	0.216	-0.067	-0.1	-0.0245	0.805167	-0.081	0.00582195	0.168667	0.00078265	-0.256167	11	9	22138.1	40
O95999	O95999	BCL10	General	0.075	-0.013	0.112	0.106	-0.003	0.026	-0.067	-0.064	-0.109	-0.078	-0.078	-0.0095	0.982599	-0.015	0.0301104	-0.138	0.568257	0.0248333	17	11	26536.4	61.8
O96000	O96000	NDUFB10	Mitochondria	-0.017	0.043	-0.002	0.075	0.041	0.067	-0.134	-0.152	-0.103	-0.03	0.064	0.0895	0.831386	0.053	0.0118628	-0.137667	0.00936723	0.170833	37	19	21061.6	66.8
O96005	O96005	CLPTM1	General	-0.185	-0.023	-0.038	-0.05	0.14	-0.033	0.106	0.171	-0.02	0.016	0.028	0.0075	0.881235	0.101	0.0744645	0.167667	0.280439	-0.0685	31	15	76323.4	32.4
O96006	O96006	ZBED1	General	0.041	0.007	-0.024	0.044	0.041	0.047	-0.133	-0.213	-0.181	0.055	0.147	0.0895	0.886515	0.036	0.00603574	-0.183667	0.000925503	0.272833	43	25	78952.9	40.4
O96007	O96007	MOCS2	General	-0.009	-0.098	-0.067	-0.062	0.022	-0.025	0.11	0.214	0.128	0.015	-0.096	0.0115	0.920152	0.0363333	0.00724566	0.208667	0.0145277	-0.173833	21	13	21171.8	72.8
O96008	O96008	TOMM40	Outer mitochondrial membrane	-0.022	-0.115	-0.274	-0.151	0.156	-0.176	-0.046	-0.049	-0.13	0.24	0.046	0.3865	0.942978	0.08	0.47797	0.062	0.0166645	0.299167	16	9	38234.7	40.9
O96011	O96011	PE1B	Mitochondria	-0.006	-0.038	-0.075	-0.069	-0.003	0.148	-0.122	-0.029	-0.036	0.02	-0.044	0.1195	0.906424	0.065	0.652	-0.0226667	0.148298	0.0941667	3	3	28887.2	13.8
O96013	O96013	PAK4	General	-0.015	-0.042	0.006	0.008	-0.058	0.003	0.05	0.087	0.07	-0.039	-0.061	-0.0245	0.997839	0.00133333	0.0471918	0.086	0.016502	-0.1105	55	29	64356.2	59.7
O96015	O96015	DNAL4	General	0.043	0.024	0.025	0.013	-0.131	0.035	-0.13	-0.077	0.074	-0.051	-0.136	-0.0145	0.895935	-0.0583333	0.2968	-0.075	0.768354	-0.0228333	2	2	12236.8	18
O96017	O96017-2	CHEK2	General	-0.252	0.14	0.205	0.321	-0.17	-0.001	0.531	0.566	0.635	-0.337	-0.231	-0.5355	0.996126	0.019	0.0100449	0.546333	6.96e-05	-0.945167	2	5	66216.4	31.1
O96017	O96017-9	CHEK2	General	-0.003	0.011	0.023	0.016	-0.007	-0.004	0.028	-0.003	-0.022	-0.026	-0.002	-0.0155	0.982205	-0.00866667	0.80762	-0.00933333	0.692196	-0.0155	31	23	26311.4	43.5
O96018	O96018	APBA3	General	0.067	0.008	-0.1	-0.041	0.037	0	-0.043	-0.034	-0.009	-0.023	0.036	0.0195	0.993775	0.007	0.746936	-0.0203333	0.319257	0.0395	11	8	62137.7	18.6
O96019	O96019	ACTL6A	General	0.021	-0.055	0.004	0.018	-0.023	0	-0.089	-0.02	0.059	-0.063	-0.059	0.0305	0.985852	0.00833333	0.917858	-0.00666667	0.828737	-0.0138333	73	25	47973.6	63.4
O96020	O96020	CCNE2	General	0.081	0.06	0.056	-0.049	0.004	-0.016	-0.102	-0.12	0.016	0.044	0.065	0.0745	0.637757	-0.086	0.0393583	-0.134333	0.034756	0.129833	10	7	47327	20.5
O96028	O96028	NSD2	General	0.01	0.012	0.024	-0.009	-0.068	0.026	0	-0.041	0.009	-0.095	-0.007	-0.0255	0.920152	-0.0323333	0.480568	-0.026	0.483047	-0.0318333	70	57	156306	47.7
O96033	O96033	MOCS2	General	0.031	-0.072	0.006	0.018	-0.003	-0.073	0.036	0.058	0.035	0.009	-0.099	0.0125	0.989839	-0.00766667	0.2483	0.0546667	0.173082	-0.0688333	15	6	9812.2	61.3
P00338	P00338	LDHA	General	0.077	0	0.017	-0.004	-0.016	0.007	-0.117	-0.009	-0.011	0.066	-0.06	0.0035	0.901243	-0.0356667	0.175999	-0.077	0.40678	0.0488333	187	38	36973.3	94.2
P00367	P00367	GLUD1	Mitochondria	0.008	0.026	-0.122	-0.042	0.016	-0.114	0.311	0.329	0.422	-0.024	-0.039	-0.0445	0.982599	-0.0173333	0.00176129	0.383333	0.000174045	-0.389833	84	37	61739.1	68.1
P00374	P00374	DHFR	General	0.114	-0.003	0.088	0.038	0.004	0.039	-0.154	-0.087	-0.184	-0.003	-0.108	0.0935	0.91589	-0.0393333	0.00928632	-0.208	0.0727266	0.135833	48	18	21509.4	86.6
P00387	P00387-3	CYB5R3	Mitochondria	-0.133	0.04	0.042	0.048	0.023	-0.035	0.084	0.051	0.079	-0.074	-0.047	-0.0565	0.966475	0.029	0.212527	0.0883333	0.00771496	-0.1305	63	23	38568	70
P00390	P00390-2	GSR	Mitochondria	0.084	0.009	0.064	0.114	0.023	0.038	-0.239	-0.173	-0.156	0.011	-0.03	0.0525	0.991219	0.006	0.00266149	-0.241667	0.0036165	0.2005	79	35	52270.2	81.4
P00403	P00403	MT-CO2	Mitochondria	-0.165	0.139	0.068	0.02	0.08	-0.239	0.254	0.326	0.151	-0.159	-0.209	-0.2045	0.959251	-0.0603333	0.0679662	0.229667	0.000324009	-0.4345	19	7	25735.7	40.9
P00441	P00441	SOD1	Mitochondria	0.326	0.083	0.263	0.09	0.114	-0.174	-0.339	-0.364	-0.987	0.252	0.149	-0.0145	0.805167	-0.214	0.0120299	-0.787333	0.0112689	0.692167	40	17	16163.7	97.4
P00488	P00488	F13A1	General	-0.043	-0.219	-0.322	-0.217	0.055	-0.284	1.586	1.834	1.553	0.102	0.151	-0.2195	0.972569	0.046	4.87e-05	1.85233	3.37e-05	-1.6465	3	3	83779.3	4.9
P00491	P00491	PNP	General	0.029	-0.024	-0.053	-0.028	0.038	-0.031	-0.053	-0.034	-0.122	0.108	0.04	0.0005	0.9867	0.009	0.28354	-0.0536667	0.0421143	0.119167	83	27	32345.5	92.3
P00492	P00492	HPRT1	General	0.089	-0.034	-0.034	-0.026	0.034	-0.041	-0.078	-0.019	-0.109	0.064	-0.002	0.0775	0.972912	-0.018	0.218984	-0.0756667	0.0372239	0.115167	41	15	24807.2	82.1
P00505	P00505	GOT2	Mitochondria	-0.02	-0.303	-0.611	-0.773	-0.107	-0.12	-0.005	-0.018	0.921	0.42	-0.039	0.7615	0.997353	-0.022	0.117066	0.610667	0.834195	0.0815	24	18	47916.2	47.2
P00519	P00519-2	ABL1	General	0.022	0.037	0.046	0.011	0.003	0.033	-0.033	-0.05	-0.005	-0.018	-0.061	-0.0275	0.942978	-0.0193333	0.10015	-0.0643333	0.881913	-0.00616667	30	26	125637	28.2
P00533	P00533	EGFR	ER membrane	-0.046	0.029	-0.007	-0.048	0.018	-0.172	0.566	0.522	0.479	-0.115	-0.042	-0.0425	0.906424	-0.0593333	0.000113407	0.530333	2.85e-05	-0.588833	102	62	137698	62.3
P00558	P00558	PGK1	General	0.049	-0.015	0.094	0.075	0.012	0.022	-0.089	-0.04	-0.054	0.009	-0.1	0.0015	0.991082	-0.00633333	0.0591191	-0.103667	0.535174	0.0311667	245	40	45013.3	86.5
P00734	P00734	F2	Endoplasmic Reticulum	-0.035	-0.134	-0.17	-0.215	-0.005	-0.312	1.764	2.002	1.622	0.161	0.152	0.0465	0.940308	-0.0643333	3.94e-05	1.909	1.29e-05	-1.67617	9	6	71519	12.8
P00747	P00747	PLG	General	-0.135	0.004	0.002	-0.039	0.128	-0.188	2.059	2.255	2.033	0.043	-0.049	-0.0035	0.996126	0.01	1.29e-05	2.15867	1.35e-06	-2.11883	7	6	93306	6.6
P00813	P00813	ADA	General	0.14	0.05	0.109	0.118	0.081	0.057	-0.271	-0.223	-0.331	0.033	-0.082	-0.0455	0.972912	-0.0143333	0.000723119	-0.374667	0.00300331	0.2435	33	23	41049	58.9
P00846	P00846	MT-ATP6	Mitochondria	-0.157	0.018	-0.202	-0.027	0.181	-0.266	0.722	0.526	0.152	-0.002	0.093	-0.2415	0.950318	0.0763333	0.0169408	0.580333	0.0204546	-0.516833	5	2	24816.8	7
P00966	P00966	ASS1	General	0.087	0.061	0.053	0.176	0.08	0.089	-0.631	-0.545	-0.427	0.033	-0.044	0.0205	0.886082	0.048	0.00033138	-0.601333	0.000220373	0.5375	173	42	46814.8	82.7
P00973	P00973-3	OAS1	General	-0.151	-0.145	-0.061	-0.006	0	-0.012	0.599	0.636	0.703	0.031	-0.089	0.0545	0.601762	0.113	5.4e-05	0.765	5.29e-05	-0.647167	26	15	48091.3	35
P01024	P01024	C3	Endoplasmic Reticulum	0.057	0.032	0.025	-0.135	-0.13	-0.116	0.592	0.553	0.485	-0.017	0.048	-0.0945	0.161821	-0.165	0.000134891	0.505333	8.73e-05	-0.5645	74	54	188685	36.6
P01033	P01033	TIMP1	Endoplasmic Reticulum	-0.032	-0.044	-0.07	-0.031	0.02	-0.048	0.332	0.438	0.385	0.035	0.024	-0.0535	0.920863	0.029	0.000247668	0.433667	0.000286746	-0.383167	14	7	23855.1	46.3
P01034	P01034	CST3	Endoplasmic Reticulum	-0.021	0.03	0.013	0.031	-0.045	-0.005	0.068	0.07	-0.007	-0.073	-0.018	-0.0845	0.972569	-0.0136667	0.418325	0.0363333	0.0479549	-0.102167	10	6	16027.2	54.7
P01106	P01106-2	MYC	General	-0.016	0.042	0.026	-0.043	-0.114	-0.009	0.298	0.355	0.406	-0.161	-0.091	-0.0935	0.82075	-0.0726667	0.000826823	0.335667	9.44e-05	-0.468167	13	10	51134.7	25.7
P01111	P01111	NRAS	Endoplasmic Reticulum	0.033	0.054	-0.054	0.007	0.126	-0.082	-0.141	-0.158	-0.154	0.094	0.125	0.0735	0.997353	0.006	0.0117885	-0.162	0.000475128	0.2485	11	12	21514.1	59.7
P01112	P01112	HRAS	Endoplasmic Reticulum	-0.122	0.075	0.015	0.038	0.108	-0.107	0.021	0.152	0.074	-0.128	-0.079	0.0385	0.982599	0.0236667	0.247036	0.093	0.0624739	-0.1385	4	11	21640.1	59.7
P01116	P01116-2	KRAS	Endoplasmic Reticulum	-0.072	0.08	-0.036	0.02	0.094	-0.129	0.045	-0.016	-0.047	-0.029	0.004	-0.0025	0.997735	0.00433333	0.961267	0.00333333	0.94651	-0.00316667	23	12	21940.7	61.1
P01116	P01116	KRAS	Endoplasmic Reticulum	-0.1	0.094	-0.064	0.077	0.061	-0.087	0.1	0.048	0.144	-0.061	0.036	-0.0385	0.95358	0.0403333	0.128744	0.120667	0.0412062	-0.1185	4	11	21652.4	59.7
P01130	P01130	LDLR	General	-0.017	0.059	-0.057	-0.001	0.018	-0.128	0.149	0.094	0.113	-0.098	-0.047	-0.0555	0.952379	-0.032	0.0388944	0.123667	0.00254095	-0.1855	31	25	98968.8	37.9
P01137	P01137	TGFB1	General	-0.024	0.001	-0.04	0.009	-0.084	0.033	0.235	0.307	0.402	0.001	-0.033	-0.0425	0.989839	0.007	0.00190614	0.335667	0.000826425	-0.3395	8	6	45025	12.8
P01344	P01344-3	IGF2	General	0.007	0.1	0.035	0.085	-0.053	0.004	0.104	-0.13	0.174	-0.212	-0.152	-0.0205	0.940308	-0.0353333	0.986147	0.002	0.113883	-0.1775	2	2	26786.5	9.3
P01891	P01891	HLA-A	General	-0.05	0.082	0.05	-0.059	-0.001	-0.152	0.268	0.23	0.25	-0.22	-0.093	-0.0815	0.830581	-0.098	0.00575455	0.222	0.000379679	-0.380833	69	26	41193.3	56.1
P02144	P02144	MB	General	0.032	-0.055	-0.008	-0.029	0.022	0.023	0.01	0.161	0.133	-0.038	-0.184	-0.0095	0.972319	0.0156667	0.102075	0.111667	0.0373076	-0.1785	10	8	17240.5	50
P02452	P02452	COL1A1	Endoplasmic Reticulum	-0.006	0.054	0.014	-0.037	0.123	0.105	-0.383	-0.293	-0.295	-0.035	0.108	-0.0015	0.935064	0.043	0.000686531	-0.344333	0.000852114	0.3475	5	5	139966	6.8
P02462	P02462	COL4A1	Endoplasmic Reticulum	0.018	0.066	0.099	0.105	-0.054	0.066	-0.476	-0.333	-0.46	0.053	0.086	0.0645	0.972557	-0.022	0.000463068	-0.484	0.000123161	0.490833	7	8	161753	7
P02511	P02511	CRYAB	General	0.039	0.011	0.105	0.126	0.137	0.045	-0.414	-0.399	-0.393	0.088	-0.044	0.0075	0.886515	0.051	0.000164566	-0.453667	0.000159866	0.419167	9	6	20158.5	30.2
P02545	P02545	LMNA	General	0.03	-0.018	-0.043	0.018	-0.008	0.061	-0.132	-0.09	0.009	0.059	0.071	0.0455	0.919471	0.034	0.303581	-0.0606667	0.0331748	0.1295	298	84	74423.5	80.4
P02549	P02549	SPTA1	General	0.066	-0.025	-0.113	-0.085	0.004	-0.072	0.033	-0.051	-0.098	0.072	0.057	0.0595	0.966475	-0.027	0.850122	-0.0146667	0.0638619	0.1015	7	5	281208	1.6
P02647	P02647	APOA1	Endoplasmic Reticulum	-0.118	-0.002	0.062	-0.055	0.019	-0.01	0.006	-0.005	0.155	-0.085	-0.094	-0.0825	0.997735	0.004	0.390614	0.0713333	0.0396178	-0.139167	4	2	30777.3	5.6
P02649	P02649	APOE	Endoplasmic Reticulum	-0.058	-0.201	-0.225	-0.084	0.01	-0.191	1.272	1.427	1.266	0.245	0.179	0.0525	0.907161	0.073	2.77e-05	1.483	1.35e-05	-1.16283	9	4	36267.6	11.6
P02689	P02689	PMP2	General	-0.114	-0.193	-0.089	0.018	0.134	-0.14	-0.052	0.049	-0.148	-0.029	-0.051	0.1205	0.824408	0.136	0.278447	0.0816667	0.430657	0.0638333	2	2	15023.2	12.1
P02750	P02750	LRG1	General	-0.016	-0.016	0.019	-0.032	-0.038	-0.078	0.214	0.176	0.182	-0.014	-0.065	-0.0375	0.869992	-0.045	0.00229688	0.195	0.000793074	-0.2295	9	6	38405.4	16.1
P02786	P02786	TFRC	General	-0.086	-0.068	-0.214	-0.077	0.047	-0.128	0.217	0.187	0.054	0.093	0.157	0.0745	0.901243	0.07	0.00997217	0.275333	0.480654	-0.0445	149	55	85326.2	64.7
P02792	P02792	FTL	General	0.01	-0.063	-0.184	-0.052	0.025	0.092	-0.135	-0.287	-0.255	0.18	0.175	0.2155	0.855077	0.100667	0.0981217	-0.146667	0.000294884	0.415833	5	5	20076.4	30.8
P02794	P02794	FTH1	Mitochondria	-0.031	0.058	0.013	0.097	-0.003	0.157	-0.151	-0.071	-0.019	-0.008	0.119	0.0635	0.885527	0.0703333	0.125837	-0.0936667	0.0428202	0.1385	17	9	21396.4	66.6
P03886	P03886	MT-ND1	Mitochondria	-0.028	0.098	-0.087	-0.013	0.1	-0.169	0.691	0.571	0.603	-0.057	-0.133	-0.2265	0.985852	-0.0216667	0.000362391	0.627333	3.7e-05	-0.7605	7	3	35659.9	8.8
P03905	P03905	MT-ND4	Mitochondria	-0.002	0.041	-0.12	-0.09	0	-0.233	0.508	0.376	0.269	-0.109	0.026	-0.0095	0.901286	-0.0806667	0.00441919	0.411333	0.00162778	-0.415167	5	2	51751.2	6.3
P03915	P03915	MT-ND5	Mitochondria	-0.046	0.14	0.043	-0.056	0.038	-0.04	0.416	0.378	0.319	-0.143	-0.158	-0.1675	0.896546	-0.065	0.00380351	0.325333	3.18e-05	-0.527167	5	3	67367.6	5.9
P03928	P03928	MT-ATP8	Mitochondria	-0.038	0.052	-0.114	-0.067	-0.106	-0.091	0.198	0.143	0.438	0.121	-0.046	-0.0525	0.898127	-0.0546667	0.0290656	0.293	0.0369012	-0.252167	3	2	8048.6	32.3
P03973	P03973	SLPI	General	0.039	-0.057	-0.026	-0.021	-0.152	-0.078	0.755	0.71	0.665	-0.031	-0.061	0.0185	0.87525	-0.069	5.4e-05	0.724667	1.05e-05	-0.7345	10	9	15238.7	44.6
P04003	P04003	C4BPA	General	0.15	0.086	0.068	-0.006	-0.033	-0.024	-0.026	-0.086	-0.085	-0.045	0.082	-0.0165	0.503777	-0.122333	0.00961402	-0.167	0.183603	0.0725	57	29	69085.9	50.9
P04004	P04004	VTN	Endoplasmic Reticulum	0.057	-0.229	-0.032	-0.099	-0.077	-0.244	1.687	1.562	1.662	-0.073	-0.01	0.0305	0.936563	-0.072	2.93e-05	1.705	1.22e-06	-1.6545	8	7	55103.4	15.4
P04035	P04035-3	HMGCR	ER membrane	0.028	-0.133	-0.068	-0.036	0.02	-0.005	0.022	-0.038	-0.032	0.058	0.143	0.0775	0.906424	0.0506667	0.498935	0.0416667	0.0375203	0.108833	7	6	101347	6.2
P04040	P04040	CAT	Mitochondria	0.022	0.052	0.046	0.083	-0.017	0.101	-0.132	-0.165	-0.082	-0.025	0.054	0.0495	0.972912	0.0156667	0.00692435	-0.166333	0.0120003	0.1525	105	43	59983.3	72.1
P04049	P04049-2	RAF1	General	0.1	0.031	0.108	0.063	0.043	0.008	-0.191	-0.113	-0.191	-0.004	-0.004	0.0385	0.890021	-0.0416667	0.00286636	-0.244667	0.00487028	0.175167	28	27	76249.7	45.3
P04066	P04066	FUCA1	General	0.081	-0.004	-0.038	-0.031	-0.14	0.057	-0.047	0.103	0.1	0.069	0.207	0.0665	0.936563	-0.051	0.582532	0.039	0.389652	0.0621667	2	2	53973.1	6
P04075	P04075	ALDOA	General	0.018	0.021	0.103	0.086	0.006	0.034	-0.148	-0.066	-0.077	-0.002	-0.076	0.0235	0.993775	-0.00533333	0.0230601	-0.144333	0.134731	0.0788333	258	43	39875.7	96.4
P04080	P04080	CSTB	General	0.435	-0.1	-0.064	0.015	0.11	-0.076	-0.551	-0.082	-0.177	0.351	0.015	0.3835	0.966475	-0.074	0.140924	-0.360333	0.0165896	0.519833	26	11	11196.4	90.8
P04083	P04083	ANXA1	General	0.006	-0.112	-0.001	0.024	-0.018	-0.044	0.439	0.601	0.581	-0.08	-0.18	-0.0325	0.959508	0.023	0.00045759	0.576	0.000119254	-0.637833	126	38	38941.8	84.1
P04114	P04114	APOB	Endoplasmic Reticulum	0.019	0.008	-0.108	-0.016	0.026	-0.12	0.131	0.06	0.05	-0.037	0.057	-0.0515	0.989839	-0.00966667	0.0948556	0.107333	0.103894	-0.0908333	32	20	516964	3.6
P04150	P04150	NR3C1	General	0.075	0.051	0.049	0.044	0.051	0.095	-0.281	-0.25	-0.33	0.031	0.056	0.0705	0.989839	0.005	0.000376067	-0.345333	0.000193241	0.3395	71	40	86798.9	61.2
P04156	P04156	PRNP	ER tail-anchored	-0.148	0.036	-0.158	-0.085	0.107	-0.287	0.392	0.333	0.199	0.065	0.085	-0.0375	0.998591	0.00166667	0.00515552	0.398	0.00636585	-0.2705	9	5	27888.9	30.8
P04179	P04179	SOD2	Mitochondria	0.087	-0.178	-0.315	-0.186	-0.044	-0.311	0.399	0.361	0.181	0.127	-0.088	0.1005	0.97357	-0.045	0.0161214	0.449	0.0204546	-0.267167	10	8	24920.8	50
P04181	P04181	OAT	Mitochondria	0.062	-0.018	-0.214	-0.064	0.033	-0.093	0.031	-0.011	0.061	0.07	0.065	0.0425	0.98803	0.0153333	0.37083	0.0836667	0.428258	0.0321667	51	31	48876.3	66.9
P04183	P04183	TK1	General	0.089	-0.149	-0.105	-0.044	0.001	-0.035	-0.034	0.079	-0.023	0.077	0.013	0.0875	0.972557	0.029	0.489298	0.0623333	0.328738	0.0518333	46	21	26095.8	73
P04275	P04275	VWF	Endoplasmic Reticulum	-0.053	-0.022	-0.01	0.023	0.044	0.031	0.071	-0.037	-0.097	-0.06	0.025	0.0865	0.805167	0.061	0.913445	0.00733333	0.591548	0.0381667	7	2	322610	0.6
P04406	P04406-2	GAPDH	General	0.096	0.01	0.044	0.164	-0.108	0.142	-0.627	-0.086	0.155	0.086	0.005	0.0205	0.98803	0.016	0.331835	-0.236	0.311674	0.223167	14	36	36223.7	98.2
P04406	P04406	GAPDH	General	0.083	0.028	0.1	0.103	0.008	0.079	-0.18	-0.101	-0.036	0.001	-0.08	0.0345	0.989839	-0.007	0.0184401	-0.176	0.150152	0.0908333	513	39	31718.5	97.3
P04424	P04424	ASL	General	0.037	0.068	0.124	0.093	0.015	0.041	-0.125	-0.038	-0.1	-0.033	-0.098	-0.0775	0.943258	-0.0266667	0.0132837	-0.164	0.702182	0.0181667	17	12	51942.3	25.2
P04626	P04626	ERBB2	General	0.004	0.151	0.036	0.057	0.085	-0.035	-0.165	-0.017	-0.196	-0.012	0.121	0.0185	0.961851	-0.028	0.0426424	-0.189667	0.040773	0.1685	7	21	141274	18.7
P04731	P04731	MT1A	General	0.146	-0.032	0.113	-0.112	-0.106	0.052	0.163	0.327	0.259	-0.055	-0.391	-0.0665	0.82075	-0.131	0.0587998	0.174	0.00737818	-0.4205	3	2	7261.3	44.2
P04733	P04733	MT1F	General	-0.105	-0.168	-0.177	-0.133	-0.071	0.12	0.103	0.288	0.19	-0.037	-0.016	0.1065	0.831386	0.122	0.00267567	0.343667	0.0370477	-0.175833	3	2	7227.2	32.7
P04792	P04792	HSPB1	General	-0.047	0.036	0.016	-0.003	-0.028	-0.051	0.088	0.204	0.178	-0.013	-0.09	-0.1205	0.936045	-0.029	0.0237422	0.155	0.00408095	-0.231167	124	25	22839.1	96
P04798	P04798	CYP1A1	General	-0.183	-0.189	-0.145	-0.061	-0.01	-0.044	0.195	0.223	0.131	0.107	0.055	0.0615	0.356464	0.134	0.000463653	0.355333	0.0374863	-0.1085	8	7	58677.7	16.2
P04818	P04818	TYMS	General	-0.004	0.045	0.026	-0.092	0.008	-0.095	0.05	0.187	0.083	-0.027	-0.073	-0.1335	0.805167	-0.082	0.148119	0.0843333	0.0133546	-0.1845	42	20	36000.6	64.8
P04843	P04843	RPN1	ER membrane	-0.115	-0.059	0.006	0.101	0.025	-0.006	0.125	0.032	-0.005	-0.054	0.044	-0.0505	0.805259	0.096	0.112371	0.106667	0.231314	-0.0708333	141	51	68682.2	73.4
P04844	P04844	RPN2	ER membrane	-0.116	-0.098	-0.069	-0.073	0.088	-0.015	0.183	0.057	-0.111	0.113	0.139	0.0795	0.815969	0.0943333	0.163255	0.137333	0.444533	0.0675	65	29	69396.8	56.4
P04899	P04899	GNAI2	General	-0.017	0.076	-0.064	-0.025	0.065	-0.101	0.052	-0.03	-0.187	0.028	0.037	0.0725	0.982579	-0.0186667	0.552914	-0.0533333	0.189554	0.100833	26	22	41020.7	65.3
P04920	P04920-3	SLC4A2	General	-0.048	0.063	-0.004	-0.013	0.115	0.017	-0.026	-0.12	-0.154	0.006	0.125	0.0875	0.940308	0.036	0.11227	-0.103667	0.0177011	0.172833	47	37	136758	39.2
P05023	P05023-4	ATP1A1	General	-0.105	0.038	-0.039	-0.018	0.063	-0.14	0.173	0.076	0.055	-0.069	0.024	0.0455	0.997735	0.00366667	0.0630573	0.136667	0.103231	-0.101167	155	56	114310	51.5
P05026	P05026	ATP1B1	General	-0.121	-0.117	-0.341	-0.105	0.034	-0.289	0.09	0.048	0.011	0.334	0.167	0.1655	0.943258	0.073	0.0234548	0.242667	0.0268358	0.1725	24	15	35460	46.8
P05062	P05062	ALDOB	General	-0.002	0.026	0.054	0.073	-0.011	0.002	-0.06	-0.034	0.034	-0.049	-0.098	-0.0065	0.994172	-0.00466667	0.329212	-0.046	0.537708	-0.0311667	8	5	39985.8	9
P05067	P05067	APP	General	-0.036	0.089	0.096	0.029	0.015	-0.017	-0.055	-0.043	-0.041	-0.114	-0.059	-0.0595	0.921259	-0.0406667	0.105306	-0.096	0.423064	-0.0311667	42	29	87968.7	41.2
P05109	P05109	S100A8	General	0.41	-0.266	-0.22	-0.1	0.009	-0.209	1.718	1.835	1.855	0.062	-0.052	-0.0345	0.972912	-0.0746667	0.000440252	1.828	1.22e-06	-1.81083	2	2	10891.4	23.6
P05114	P05114	HMGN1	General	0.164	0.069	0.051	0.027	-0.037	0.156	-0.151	-0.19	-0.266	-0.026	0.158	0.1015	0.940308	-0.046	0.00287091	-0.297	0.00432551	0.280167	26	9	10658.7	55
P05141	P05141	SLC25A5	Mitochondria	-0.099	-0.016	-0.396	0.033	0.092	-0.001	0.047	0.025	0.088	0.053	0	-0.0545	0.805167	0.211667	0.0970176	0.223667	0.270105	-0.0538333	48	34	33079.8	65.7
P05161	P05161	ISG15	General	0.198	0.041	0.187	-0.156	-0.137	-0.242	0.818	0.938	0.83	-0.064	-0.207	0.0875	0.194717	-0.320333	0.00019973	0.72	7.36e-05	-0.923167	20	10	17944.2	72.1
P05165	P05165	PCCA	Mitochondria	-0.008	0.061	-0.079	-0.023	0.019	-0.026	0.031	0.037	0.08	-0.023	-0.041	-0.0595	0.99832	-0.00133333	0.299312	0.058	0.0403008	-0.0905	23	20	80685.1	32.5
P05187	P05187	ALPP	General	0.164	0.054	0.052	-0.36	-0.202	-0.427	1.092	1.11	1.145	-0.153	-0.098	0.0405	0.161821	-0.419667	2.35e-05	1.02567	5.73e-06	-1.18583	24	16	58295.1	43.9
P05198	P05198	EIF2S1	General	0.063	-0.061	0.005	0.03	-0.003	0.042	-0.092	-0.033	-0.004	0.03	0.009	0.0545	0.965012	0.0206667	0.420837	-0.0453333	0.110634	0.0741667	140	38	36396.8	81.5
P05204	P05204	HMGN2	General	-0.067	0.162	-0.154	0.063	-0.053	0.054	-0.056	-0.069	-0.179	0.002	0.002	0.1875	0.966475	0.041	0.45871	-0.0816667	0.0523231	0.165167	14	11	9392.5	54.4
P05362	P05362	ICAM1	General	-0.072	0.047	0.052	-0.058	-0.013	-0.253	0.901	0.824	0.913	-0.172	-0.043	-0.0685	0.855083	-0.117	4.87e-05	0.870333	6.95e-06	-0.973833	46	25	58622.9	45.3
P05386	P05386	RPLP1	General	-0.001	0	0.064	0.042	-0.066	-0.001	-0.08	0.005	0.026	-0.094	-0.082	-0.0115	0.942611	-0.0293333	0.472038	-0.0373333	0.37395	-0.0461667	44	5	11627.8	94.7
P05387	P05387	RPLP2	General	-0.004	0.01	0.086	0.06	-0.096	-0.002	-0.007	0.029	0.216	-0.101	-0.13	-0.0605	0.933873	-0.0433333	0.560269	0.0486667	0.0400767	-0.1765	47	9	11664.7	93
P05388	P05388	RPLP0	Endoplasmic Reticulum	0.084	-0.076	-0.111	-0.039	-0.011	-0.013	-0.054	0.019	0.04	0.07	-0.003	0.0675	0.9867	0.0133333	0.63927	0.036	0.378957	0.0431667	104	29	34444.1	76
P05413	P05413	FABP3	General	-0.082	-0.281	-0.241	0.159	0.152	0.104	-0.154	-0.177	-0.344	0.166	0.012	0.1205	0.192994	0.339667	0.807549	-0.0236667	0.00396211	0.3245	14	10	14914.8	73.6
P05423	P05423	POLR3D	General	0.008	-0.011	-0.056	-0.041	-0.049	-0.008	0.169	0.163	0.123	-0.007	0.05	0.0015	0.972569	-0.013	0.00556561	0.171333	0.00980853	-0.136833	29	23	44566.2	64.3
P05455	P05455	SSB	General	-0.012	-0.06	-0.018	-0.006	-0.07	-0.022	0.111	0.165	0.157	-0.045	-0.069	0.0235	0.997735	-0.00266667	0.00485738	0.174333	0.00583326	-0.1745	132	50	47007.4	79.4
P05556	P05556	ITGB1	General	-0.112	-0.019	0.014	0.053	0.045	-0.048	0.094	-0.005	0.006	-0.091	0.044	0.0305	0.896546	0.0556667	0.249106	0.0706667	0.544215	-0.0371667	107	42	91722.9	55.2
P05997	P05997	COL5A2	Endoplasmic Reticulum	-0.001	0.072	0.069	0.196	0.079	0.066	-0.506	-0.557	-0.609	-0.012	0.065	0.0105	0.881235	0.067	9.4e-05	-0.604	3.36e-05	0.5785	21	18	145878	14.5
P06132	P06132	UROD	General	-0.033	-0.029	0.019	0.02	0.027	-0.01	0.015	-0.004	-0.057	0.006	-0.047	-0.0115	0.922718	0.0266667	0.983152	-0.001	0.961705	-0.00216667	35	14	41128.5	52.3
P06213	P06213	INSR	General	-0.054	0.026	-0.031	-0.071	0.024	-0.126	0.123	0.109	0.036	0.079	0.046	0.0105	0.940058	-0.038	0.0534504	0.109	0.344591	-0.0441667	30	29	159012	22.5
P06241	P06241	FYN	General	-0.023	0.079	-0.08	-0.008	0.123	-0.09	-0.033	-0.153	-0.282	0.112	0.218	0.1025	0.9867	0.0163333	0.134874	-0.148	0.00717317	0.300167	47	29	61274.3	56.9
P06241	P06241-2	FYN	General	-0.029	0.034	-0.092	0.037	0.101	-0.199	-0.006	-0.192	-0.18	0.09	0.199	0.1345	0.997353	0.00866667	0.23212	-0.097	0.00651653	0.267167	4	27	60710.4	54.6
P06276	P06276	BCHE	General	-0.256	-0.341	-0.421	0.102	0.109	0.124	-0.145	-0.194	-0.073	0.19	0.219	0.1085	0.0631806	0.451	0.020613	0.202	0.00113904	0.309833	15	11	68987.3	20.7
P06280	P06280	GLA	General	-0.007	0.003	-0.081	-0.029	0.005	0.007	0.013	-0.026	-0.058	0.117	0.161	0.0745	0.948255	0.0226667	0.927566	0.00466667	0.014072	0.141167	24	17	49507.6	46.3
P06396	P06396	GSN	General	0.023	0.001	0.03	0.141	0.062	0.089	-0.189	-0.176	-0.204	0.04	0.003	-0.0045	0.757092	0.0793333	0.00146278	-0.207667	0.00122425	0.2025	31	21	86095.3	32.9
P06400	P06400	RB1	General	-0.071	-0.073	-0.051	-0.005	-0.004	-0.008	0.378	0.414	0.308	0.038	-0.007	-0.0575	0.802894	0.0593333	0.000243213	0.431667	0.000314975	-0.3755	24	20	107013	23.5
P06454	P06454	PTMA	General	0.013	0.044	0.079	0.025	-0.04	0.007	-0.046	-0.025	0.056	-0.095	-0.106	-0.0445	0.881235	-0.048	0.316601	-0.0503333	0.130328	-0.0768333	63	10	12202.8	45
P06493	P06493	CDK1	General	0.001	-0.027	0.03	-0.01	-0.016	0	0.017	0.075	0.021	0.016	-0.092	-0.0285	0.977806	-0.01	0.386155	0.0363333	0.149864	-0.0725	66	26	34151.9	74
P06576	P06576	ATP5B	Mitochondria	-0.032	0.042	-0.098	-0.001	0.002	-0.046	0.072	0.096	0.226	-0.018	-0.077	-0.0435	0.982205	0.0143333	0.0520228	0.160667	0.0150204	-0.1775	181	35	56558.9	83.7
P06702	P06702	S100A9	General	-0.133	-0.2	-0.107	-0.069	0.066	-0.198	2.086	2.224	2.236	0.101	-0.066	0.0145	0.901243	0.0796667	6.23e-06	2.32867	1.22e-06	-2.1655	4	4	13298.8	31.5
P06703	P06703	S100A6	General	0.084	-0.03	0.001	-0.036	0.031	-0.061	0.142	0.287	0.19	-0.045	-0.138	-0.0875	0.921259	-0.0403333	0.0212857	0.188	0.00158239	-0.2965	20	7	10236.6	60
P06727	P06727	APOA4	Endoplasmic Reticulum	-0.26	0.065	0.061	-0.03	-0.012	-0.077	0.193	0.127	0.163	-0.217	-0.145	-0.3335	0.997735	0.005	0.102714	0.205667	0.000685046	-0.392833	3	3	45398.2	6.5
P06730	P06730-2	EIF4E	General	0.042	0.005	-0.022	-0.013	-0.007	0.031	-0.075	-0.034	-0.018	0.077	-0.008	0.0285	0.991698	-0.00466667	0.236028	-0.0506667	0.111321	0.0748333	37	14	29005.4	48.3
P06733	P06733	ENO1	General	0.049	-0.015	0.067	0.078	0.019	0.051	-0.114	-0.075	-0.053	-0.005	-0.085	0.0125	0.971904	0.0156667	0.0351262	-0.114333	0.254708	0.0548333	440	45	47510.4	85.4
P06737	P06737	PYGL	General	-0.031	-0.138	-0.137	-0.01	0.018	0.026	0.036	0.028	-0.023	0.071	0.044	0.0565	0.662575	0.113333	0.053971	0.115667	0.273643	0.0435	82	61	97546.2	68
P06744	P06744	GPI	General	0.081	-0.027	-0.011	-0.01	0.033	0.022	-0.123	-0.083	-0.143	0.089	-0.012	0.0705	0.998591	0.000666667	0.0329914	-0.130667	0.00885786	0.1655	191	46	63374.2	66.6
P06746	P06746	POLB	Mitochondria	0.011	-0.031	0	-0.007	-0.127	-0.01	0.105	0.093	0.128	-0.159	-0.089	-0.0815	0.919638	-0.0413333	0.0161654	0.115333	0.00152629	-0.2185	18	16	38348.1	48.3
P06748	P06748	NPM1	General	-0.004	0.031	0.06	0.029	-0.088	0.049	-0.082	-0.026	0.097	-0.104	-0.056	-0.0605	0.943258	-0.0323333	0.626483	-0.0326667	0.264638	-0.0698333	274	29	32745.6	75.8
P06753	P06753-6	TPM3	General	-0.03	0.052	0.05	-0.014	-0.115	-0.058	0.147	0.295	0.296	-0.145	-0.075	-0.0105	0.805167	-0.0863333	0.0127673	0.222	0.00217566	-0.322833	3	48	29036	86.2
P06753	P06753-2	TPM3	General	-0.02	-0.061	0.044	0.006	-0.074	0.026	0.059	0.062	0.137	-0.111	-0.132	-0.0665	0.997903	-0.00166667	0.0867198	0.0983333	0.00398424	-0.189167	22	50	29260.4	87
P06756	P06756	ITGAV	General	-0.096	-0.055	-0.089	-0.022	0.051	-0.088	0.165	0.066	0.08	0.031	0.077	0.0665	0.882873	0.0603333	0.00739502	0.183667	0.33376	-0.0455	77	47	117120	46.7
P06858	P06858	LPL	General	0.156	0.115	0.145	0.005	-0.013	0.05	-0.184	-0.237	-0.3	-0.057	-0.054	-0.0535	0.44674	-0.124667	0.000495803	-0.379	0.00476532	0.1855	12	11	53732.1	25
P07093	P07093-3	SERPINE2	Endoplasmic Reticulum	-0.073	-0.643	-0.113	-0.389	0.112	-0.286	2.399	2.368	2.535	-0.107	-0.205	0.2235	0.971904	0.0886667	5.82e-05	2.71033	5.48e-06	-2.4635	2	2	45551.1	5.8
P07099	P07099	EPH	ER signal-anchored	-0.075	0.034	0.005	0.035	0.154	0.063	-0.321	-0.309	-0.558	0.111	0.257	0.0965	0.814575	0.096	0.00645607	-0.384	0.000891938	0.550833	35	23	53176.1	50.9
P07108	P07108	DBI	Endoplasmic Reticulum	0.171	0.043	0.011	0.065	0.074	0.055	-0.235	-0.219	-0.284	0.074	-0.08	0.0775	0.987762	-0.0103333	0.00262494	-0.321	0.00323697	0.269833	33	12	10044.2	94.2
P07195	P07195	LDHB	Mitochondria	0.081	-0.05	0.028	0.029	0.006	0.024	-0.101	-0.074	-0.114	0.058	-0.025	0.0365	1	0	0.0530716	-0.116	0.0212792	0.1195	204	30	36923.1	71.2
P07199	P07199	CENPB	General	0.004	0.006	-0.005	-0.018	-0.054	-0.054	0.282	0.253	0.256	-0.06	-0.016	0.0055	0.851781	-0.0436667	0.000515124	0.262	0.000323301	-0.287167	26	22	65569.5	38.3
P07203	P07203	GP	Mitochondria	-0.046	-0.05	-0.132	-0.037	-0.015	-0.067	0.175	0.185	0.171	0.074	-0.038	0.0685	0.91589	0.0363333	0.00160604	0.253	0.01724	-0.142167	42	14	22359.4	84.7
P07237	P07237	P4HB	Endoplasmic Reticulum	-0.022	0.004	0.017	0.088	-0.033	0.075	-0.041	-0.041	0.034	-0.057	-0.009	-0.0055	0.907302	0.0436667	0.726661	-0.0156667	0.869391	-0.00783333	186	55	57514.7	87.4
P07305	P07305	H1F0	General	0.01	-0.04	-0.12	0.011	-0.027	0.013	0.542	0.428	0.146	-0.088	-0.099	0.0205	0.892588	0.049	0.014592	0.422	0.00774589	-0.4275	7	4	20862.5	21.6
P07339	P07339	CTSD	General	-0.112	-0.126	-0.103	-0.009	-0.029	-0.045	0.386	0.381	0.443	0.006	0.061	0.0725	0.627717	0.086	6.71e-05	0.517	0.000177177	-0.356833	51	22	45064.9	55.5
P07355	P07355	ANXA2	General	0.107	0.001	0.03	0.093	0.035	0.072	-0.253	-0.217	-0.182	0.063	-0.033	0.0725	0.959251	0.0206667	0.0024236	-0.263333	0.00173609	0.2515	208	48	38831.6	91.1
P07384	P07384	CAPN1	General	0.008	-0.007	0.018	0.051	0.053	0.04	-0.126	-0.109	-0.193	0.076	0.08	0.0355	0.851781	0.0416667	0.0109066	-0.149	0.00230724	0.2065	69	39	82516.1	59.6
P07437	P07437	TUBB	General	0.04	-0.029	0.024	0.024	0.005	0.026	-0.113	-0.026	-0.012	0.017	-0.054	0.0105	0.987762	0.00666667	0.234059	-0.062	0.408719	0.0415	475	38	50126.4	85.1
P07476	P07476	IVL	General	0.053	0.145	0.067	0.209	0.138	-0.008	-0.17	-0.268	-0.093	-0.14	-0.041	0.1285	0.972912	0.0246667	0.0072063	-0.265333	0.107575	0.1595	3	2	68591.4	4.4
P07602	P07602	PSAP	General	0.06	0.019	0.043	0.066	0.009	-0.096	-0.028	-0.052	-0.316	0.065	0.147	0.0295	0.91589	-0.0476667	0.110483	-0.172667	0.0520706	0.2125	74	32	59937.4	54.3
P07686	P07686	HEXB	General	0.057	-0.01	-0.068	-0.023	-0.032	0.002	0	0.006	0.03	-0.061	0.052	-0.0045	0.985852	-0.0106667	0.714549	0.019	0.734862	-0.0165	64	32	63566.6	52.6
P07711	P07711	CTSL	Endoplasmic Reticulum	-0.008	-0.036	-0.011	-0.023	-0.047	-0.081	0.254	0.348	0.242	-0.107	0.005	-0.0365	0.902704	-0.032	0.00124188	0.299667	0.000804668	-0.3275	18	10	38019.9	36.3
P07737	P07737	PFN1	General	0.098	-0.05	0.04	0.117	0.005	0.049	-0.125	-0.058	-0.032	0.015	-0.091	0.0305	0.958527	0.0276667	0.12478	-0.101	0.315084	0.0565	185	13	15225.1	93.5
P07738	P07738	BPGM	General	0.004	-0.071	-0.03	0.035	0.017	-0.108	0.099	0.129	0.026	-0.042	-0.073	-0.0715	0.985852	0.0136667	0.0462444	0.117	0.0119042	-0.146833	6	6	30175.8	24.3
P07741	P07741	APRT	General	0.114	0.028	-0.016	0.057	0.005	0.053	-0.17	-0.136	-0.051	0.074	-0.071	0.0835	0.997735	-0.00366667	0.0328053	-0.161	0.0480826	0.147833	59	19	19778.6	93.8
P07814	P07814	EPRS	General	0.032	-0.034	0.009	0.039	0.012	0.044	-0.085	-0.064	-0.096	0.038	0.043	0.0535	0.920152	0.0293333	0.0602258	-0.084	0.00811038	0.1265	406	140	172185	76.7
P07858	P07858	CTSB	Endoplasmic Reticulum	-0.022	0.02	0.084	-0.002	-0.057	-0.009	0.05	0.07	0.103	-0.1	-0.02	-0.0645	0.886082	-0.05	0.334509	0.047	0.0129548	-0.135833	21	15	38790.8	46
P07900	P07900-2	HSP90AA1	Endoplasmic Reticulum	0.015	-0.025	0.026	0.038	-0.032	0.001	-0.078	0.003	0.01	0.003	-0.03	0.0145	0.997353	-0.003	0.563805	-0.027	0.709856	0.0175	263	80	98729.9	63.1
P07902	P07902	GALT	General	0.177	0.046	0.045	0.097	0.043	0.118	-0.288	-0.324	-0.342	0.02	-0.043	0.0445	0.997735	-0.00333333	0.000725137	-0.407333	0.00031035	0.325167	11	8	43647.6	27.4
P07910	P07910	HNRNPC	General	-0.01	0.269	0.295	0.266	-0.39	-0.064	-0.31	0.039	0.383	-0.506	-0.25	-0.2685	0.885527	-0.247333	0.523995	-0.147333	0.0847482	-0.378833	2	41	33726.5	86.2
P07910	P07910-2	HNRNPC	General	0.016	0.022	0.01	0.013	-0.055	0.033	-0.061	-0.053	0.116	-0.051	0.001	-0.0045	0.955048	-0.019	0.828925	-0.0153333	0.784824	-0.0188333	200	43	32394	85.6
P07919	P07919	UQCRH	Mitochondria	-0.075	0.07	-0.067	0.077	0.038	0.032	0.004	-0.066	-0.018	0.007	-0.012	0.0665	0.869992	0.073	0.967814	-0.00266667	0.301624	0.0471667	20	8	11023.9	81.3
P07948	P07948	LYN	General	-0.05	0.025	-0.146	-0.076	0.05	-0.152	0.293	0.214	0.049	0.044	0.051	0.0465	0.99832	-0.00233333	0.0340235	0.242333	0.0874827	-0.138167	33	25	59029.4	53.9
P07951	P07951-2	TPM2	General	0.031	0.008	0.034	0.054	-0.005	0.008	-0.059	-0.046	-0.012	-0.032	-0.041	-0.0385	0.989839	-0.00533333	0.108918	-0.0633333	0.962662	0.00183333	128	51	32964.3	85.5
P07951	P07951	TPM2	General	0.022	-0.144	-0.063	0.011	-0.023	-0.021	0.138	0.126	0.053	0.05	0.038	0.0265	0.906424	0.0506667	0.0327277	0.167333	0.13357	-0.0675	21	51	33046.3	83.4
P07954	P07954-2	FH	Mitochondria	-0.011	0.03	-0.014	-0.002	0.015	0.01	-0.012	-0.006	0.073	-0.038	-0.086	-0.0335	0.987978	0.006	0.723885	0.0166667	0.13795	-0.0708333	150	36	50383	82.2
P07992	P07992	ERCC1	General	-0.022	0.003	0.03	-0.016	0.014	0.011	-0.062	-0.026	-0.009	-0.044	0.021	0.0335	0.998591	-0.000666667	0.367664	-0.036	0.413762	0.0358333	19	12	32904.1	42.7
P07996	P07996	THBS1	Endoplasmic Reticulum	-0.069	0.003	0.046	0.005	-0.041	-0.09	0.834	0.783	0.794	-0.133	-0.077	-0.1725	0.937011	-0.0353333	3.44e-05	0.810333	3.79e-06	-0.931167	27	24	133374	22
P08047	P08047	SP1	General	-0.019	0.061	0.044	0.023	-0.079	0.022	-0.12	-0.019	0.037	-0.074	0.029	0.0235	0.920152	-0.04	0.321875	-0.0626667	0.681329	0.0268333	32	16	81319.2	38.3
P08069	P08069	IGF1R	General	-0.091	-0.045	-0.108	-0.06	0.071	-0.111	0.218	0.162	0.075	0.038	0.098	0.0565	0.921857	0.048	0.00612418	0.233	0.126295	-0.0875	58	46	157301	36.5
P08133	P08133	ANXA6	General	0.168	-0.027	-0.058	0.07	0.145	-0.024	-0.259	-0.276	-0.392	0.117	0.013	0.1375	0.966475	0.036	0.0085246	-0.336667	0.000597669	0.398167	155	64	76214.3	79.4
P08134	P08134	RHOC	Endoplasmic Reticulum	-0.004	-0.03	0.002	0.071	0.084	-0.097	0.13	0.028	-0.031	-0.036	-0.074	0.0625	0.958361	0.03	0.374693	0.053	0.389816	-0.0581667	56	21	22348.3	88
P08183	P08183	ABCB1	General	0.1	-0.076	-0.122	0.073	0.07	0.119	-0.122	-0.195	-0.178	0.066	0	0.1125	0.82075	0.12	0.1205	-0.132333	0.00289711	0.2245	6	4	141875	3.9
P08195	P08195-2	SLC3A2	General	-0.063	0.105	-0.051	0.186	0.196	0.079	-0.3	-0.313	-0.397	0.15	0.185	0.1705	0.725824	0.156667	0.00370344	-0.333667	4.44e-05	0.505167	7	48	58058	74.2
P08236	P08236	GUSB	General	0.081	-0.01	-0.163	-0.051	0.039	0.054	-0.099	-0.163	-0.286	0.118	0.197	0.0155	0.948255	0.0446667	0.140429	-0.152	0.00641933	0.292833	9	7	75072.8	8.9
P08237	P08237	PFKM	General	0.03	-0.044	-0.003	0.003	-0.017	0.009	-0.009	0.01	-0.008	0.01	-0.038	0.0165	0.995236	0.004	0.938653	0.00333333	0.970509	-0.0015	128	52	86036.8	70.6
P08238	P08238	HSP90AB1	Endoplasmic Reticulum	0.018	-0.054	0.001	-0.022	-0.026	-0.04	0.013	0.066	0.058	0.031	-0.056	0.0075	0.955048	-0.0176667	0.198446	0.0573333	0.258237	-0.0515	546	89	83605	79.1
P08240	P08240	SRPRA	Endoplasmic Reticulum	-0.054	-0.014	0.032	0.104	0.075	0.056	-0.021	-0.145	-0.112	0.014	0.112	0.0465	0.719023	0.0903333	0.169483	-0.0806667	0.0238945	0.150167	130	57	70266.4	73.9
P08243	P08243	ASNS	General	0.004	-0.132	-0.086	0.076	0.069	-0.013	-0.098	-0.023	-0.075	0.1	0.057	0.0645	0.77479	0.115333	0.922275	0.006	0.0106263	0.139167	83	44	64939.3	70.7
P08397	P08397	HMBS	General	0.06	-0.025	0.021	0.113	0.045	0.063	-0.138	-0.128	-0.207	0.041	0.058	0.0635	0.869992	0.055	0.009418	-0.176333	0.00166424	0.211833	47	24	39557.6	66.2
P08473	P08473	MME	General	-0.203	-0.126	-0.207	-0.013	0.098	-0.134	0.738	0.678	0.675	-0.007	0.103	-0.0095	0.74321	0.162333	2.67e-05	0.875667	2.53e-05	-0.668167	28	24	86197	32.1
P08559	P08559	PDHA1	Mitochondria	-0.017	0.033	-0.155	-0.038	-0.004	-0.083	0.267	0.29	0.391	0.028	-0.039	-0.0315	0.997735	0.00466667	0.00356142	0.362333	0.000644973	-0.330167	70	34	43979.5	80
P08572	P08572	COL4A2	Endoplasmic Reticulum	-0.011	0.057	0.064	0.072	0.005	0.062	-0.111	-0.145	-0.049	-0.064	0.163	0.0105	0.985852	0.00966667	0.0254826	-0.138333	0.0891547	0.138167	14	10	168748	7.5
P08574	P08574	CYC1	Mitochondria	-0.18	0.08	-0.051	0.007	0.188	-0.077	0.128	0.061	-0.013	0.046	-0.032	-0.0325	0.920152	0.0896667	0.253296	0.109	0.259785	-0.0648333	35	11	35763.7	38.1
P08579	P08579	SNRPB2	General	0.003	-0.028	-0.039	-0.028	-0.001	-0.028	0.064	0.011	0.055	0.066	0.081	0.0535	0.997735	0.00233333	0.120155	0.0646667	0.548357	0.0235	37	13	25485.9	48
P08581	P08581	MET	General	-0.021	0.077	-0.003	0.106	0.17	0.003	-0.363	-0.44	-0.47	0.067	0.191	0.1205	0.882873	0.0753333	0.000440252	-0.442	7.89e-05	0.5505	89	47	157878	46.1
P08582	P08582	MELTF	Endoplasmic Reticulum	-0.09	0.121	0.068	0.036	0.031	0.062	-0.128	-0.201	-0.002	-0.138	-0.059	-0.0755	0.989839	0.01	0.147055	-0.143333	0.784786	0.0195	6	6	81810.6	6.6
P08582	P08582-2	MELTF	Endoplasmic Reticulum	-0.279	0.174	0.211	0.054	-0.257	-0.252	0.007	0.235	0.544	-0.254	-0.242	-0.3155	0.891276	-0.187	0.328188	0.226667	0.00790043	-0.5325	2	3	33406.7	8.9
P08621	P08621	SNRNP70	General	-0.037	0.021	0.032	0.037	-0.062	0.032	-0.07	-0.022	0.093	-0.139	-0.046	-0.0415	0.997735	-0.003	0.941615	-0.005	0.243196	-0.0758333	123	42	51612.9	63.3
P08648	P08648	ITGA5	General	-0.179	0.058	-0.015	-0.03	0.023	-0.17	0.516	0.514	0.507	-0.052	0.058	-0.0315	0.989839	-0.0136667	0.000718468	0.557667	4.29e-05	-0.520833	30	22	115675	28.5
P08651	P08651	NFIC	General	0.022	0.048	0.05	0.017	-0.041	0.05	-0.062	-0.034	-0.032	-0.065	0.034	-0.0255	0.920984	-0.0313333	0.0454296	-0.0826667	0.602039	0.0238333	46	23	56130.4	45.6
P08670	P08670	VIM	General	-0.051	0.009	0.019	0.023	-0.049	0.043	-0.047	-0.023	0.134	-0.076	-0.054	-0.0565	0.977806	0.0133333	0.68776	0.029	0.19891	-0.0835	492	80	53707.8	94.4
P08708	P08708	RPS17	General	0.055	-0.021	0.085	0.098	-0.055	0.019	-0.111	-0.103	-0.01	-0.042	-0.062	0.0365	0.974833	-0.019	0.0707478	-0.114333	0.334263	0.0521667	77	14	15606.9	68.1
P08754	P08754	GNAI3	General	-0.205	0.088	-0.064	-0.016	0.175	-0.058	0.185	0.176	-0.105	-0.015	0.051	-0.0795	0.91589	0.094	0.285879	0.145667	0.327195	-0.0998333	17	20	41102	54.5
P08758	P08758	ANXA5	General	0.101	-0.042	-0.01	-0.005	0.037	0.022	-0.122	-0.069	-0.131	0.098	-0.035	0.0635	0.997903	0.00166667	0.0617413	-0.123667	0.0212318	0.1495	96	35	35993.2	86.8
P08842	P08842	STS	ER membrane	0.288	-0.098	-0.008	-0.11	-0.05	0.076	0.162	0.153	0.051	-0.007	0.026	-0.0255	0.937011	-0.0886667	0.640257	0.0613333	0.0321764	-0.124167	2	2	66346.9	3.7
P08865	P08865	RPSA	General	0.098	-0.011	-0.056	-0.02	-0.014	0.011	-0.134	-0.017	-0.029	0.081	0.035	0.0855	0.972912	-0.018	0.311737	-0.0703333	0.0323017	0.127167	125	27	32967.6	67.7
P08922	P08922	ROS1	General	0.041	-0.105	-0.061	0.004	-0.161	-0.029	-0.084	0.07	0.013	-0.084	-0.07	0.0275	0.979009	-0.0203333	0.56741	0.0413333	0.514125	-0.0418333	4	3	266706	0.8
P08962	P08962	CD63	General	0.074	-0.012	-0.204	-0.184	0.105	-0.248	-0.026	-0.031	-0.378	0.23	0.059	0.0985	0.959251	-0.0616667	0.51509	-0.0976667	0.0479549	0.274167	17	7	26492	26.8
P08F94	P08F94	PKHD1	Endoplasmic Reticulum	0.034	-0.116	-0.154	-0.201	0.012	0	0.518	0.244	0.084	0.115	0.034	-0.3235	0.98803	0.0156667	0.0377035	0.360667	0.0742682	-0.340167	8	6	452399	1.2
P09012	P09012	SNRPA	General	-0.021	-0.046	-0.116	-0.04	0.012	0.027	-0.009	-0.005	-0.02	0.112	0.173	0.0375	0.855083	0.0606667	0.269074	0.0496667	0.0391424	0.118833	41	13	31279	45.7
P09038	P09038	FGF2	General	0.034	0.02	-0.056	-0.053	-0.064	0.017	0.028	-0.018	-0.029	0.062	0.166	0.0795	0.937011	-0.0326667	0.912718	-0.00566667	0.0463709	0.108833	11	7	31111.8	19.4
P09104	P09104	ENO2	General	-0.032	1.236	1.432	1.475	-0.42	-0.255	-0.112	1.135	1.197	-0.312	-0.572	-0.6585	0.92001	-0.612	0.836688	-0.138667	0.0144258	-1.25417	7	13	47610	26.9
P09110	P09110	ACAA1	Mitochondria	-0.061	0.014	0.044	0.062	-0.053	0.024	0.002	-0.01	0.043	-0.099	0.002	-0.0645	0.985852	0.012	0.802566	0.0126667	0.173303	-0.0655	37	21	44861.8	70.9
P09132	P09132	SRP19	General	-0.04	-0.114	0.01	0.028	-0.041	0.027	0.003	-0.022	0.096	-0.052	0	-0.0165	0.888276	0.0526667	0.242816	0.0736667	0.336082	-0.0485	24	12	16383.6	71.5
P09382	P09382	LGALS1	Endoplasmic Reticulum	0.034	0.031	0.099	0.166	0.076	0.038	-0.136	-0.076	-0.123	0.009	-0.108	-0.0495	0.924877	0.0386667	0.00811162	-0.166333	0.219929	0.0621667	67	13	15057.8	94
P09417	P09417	QDPR	Mitochondria	0.133	-0.128	-0.289	-0.005	0.063	0.018	-0.127	-0.199	-0.131	0.084	0.075	0.0985	0.901243	0.12	0.669584	-0.0576667	0.000891039	0.238167	23	16	26017.3	66.3
P09429	P09429	HMGB1	General	0.057	0.016	0.085	0.098	-0.065	0.049	-0.08	-0.03	-0.051	-0.104	-0.064	-0.0235	0.966475	-0.0253333	0.0330307	-0.106333	0.824449	-0.0101667	143	27	25064.5	72.5
P09471	P09471-2	GNAO1	General	-0.02	0.051	0.048	-0.023	0.011	-0.032	0.051	0.161	-0.013	-0.004	-0.118	-0.1245	0.886515	-0.041	0.545644	0.04	0.053205	-0.1485	8	11	40599.4	37.8
P09493	P09493-10	TPM1	General	-0.046	-0.05	0.022	-0.003	-0.151	-0.057	0.146	0.141	0.322	-0.07	0	-0.0225	0.920152	-0.0456667	0.0166953	0.227667	0.00903076	-0.233833	2	42	32865.3	71.1
P09496	P09496-2	CLTA	General	0.021	0.039	0.1	0.116	0.025	0.103	-0.146	-0.171	-0.114	-0.018	0.044	0.0485	0.943258	0.028	0.00445388	-0.197	0.00499162	0.1685	32	16	23718.5	41.2
P09497	P09497-2	CLTB	General	-0.008	-0.027	0.042	0.025	-0.027	-0.05	0.141	0.085	0.086	-0.138	-0.024	-0.0525	0.957287	-0.0196667	0.0444826	0.101667	0.00827785	-0.1755	29	14	23294.9	39.3
P09525	P09525	ANXA4	General	0.177	0.024	0.024	0.08	0.088	-0.001	-0.324	-0.23	-0.361	0.095	-0.046	0.0965	0.977806	-0.0193333	0.00247242	-0.38	0.00131123	0.3535	73	35	36110.3	82.1
P09543	P09543	CNP	General	-0.018	0.02	-0.036	-0.006	0.028	-0.116	0.161	0.061	0.036	0.01	-0.002	0.0035	0.972557	-0.02	0.0958036	0.0973333	0.117253	-0.0821667	55	34	47977.1	68.8
P09601	P09601	HMO	ER tail-anchored	-0.03	-0.026	-0.074	0.054	0.063	0.147	-0.37	-0.391	-0.343	0.237	0.209	0.2385	0.572126	0.131333	0.000378209	-0.324667	9.82e-06	0.596167	37	18	32818	57.9
P09619	P09619	PDGFRB	General	0.003	-0.066	0.059	-0.022	-0.081	0.063	-0.052	-0.194	-0.255	0.088	0.1	0.0875	0.9867	-0.012	0.0629358	-0.165667	0.00504355	0.258833	5	5	125050	7.2
P09622	P09622	DLD	Mitochondria	-0.012	0.05	-0.099	-0.026	0.008	-0.046	0.188	0.192	0.275	-0.044	-0.099	-0.0715	0.998591	-0.001	0.00767459	0.238667	0.000596336	-0.289833	71	26	54746.8	63
P09629	P09629	HOXB7	General	0.021	-0.015	0.017	0.02	-0.015	-0.045	-0.015	0.01	0.098	-0.108	-0.096	-0.0865	0.944801	-0.021	0.642375	0.0233333	0.0238161	-0.127833	9	8	24242.4	26.7
P09661	P09661	SNRPA1	General	0.009	-0.009	-0.004	0.014	-0.056	0.003	-0.034	-0.026	0.085	-0.031	0.017	-0.0145	0.97357	-0.0116667	0.859744	0.00966667	0.739376	-0.0178333	59	30	28529.2	72.1
P09669	P09669	COX6C	Mitochondria	-0.078	0.103	0.023	0.058	0.188	-0.127	0.239	0.068	-0.034	-0.093	-0.117	-0.0735	0.985852	0.0236667	0.469453	0.075	0.0461431	-0.1855	12	6	8781.3	49.3
P09871	P09871	C1S	General	0.015	-0.017	-0.005	-0.013	-0.101	-0.124	0.224	0.205	0.355	-0.117	-0.044	-0.0875	0.815969	-0.077	0.00441845	0.263667	0.000855447	-0.344167	6	6	78223.5	10.6
P09874	P09874	PARP1	General	-0.009	-0.006	-0.008	-0.016	-0.049	0.001	0.055	0.072	0.115	-0.067	0.003	-0.0445	0.966475	-0.0136667	0.04406	0.0883333	0.0229626	-0.116833	275	93	113880	69.6
P09914	P09914	IFIT1	General	0.236	0.057	0.127	-0.157	-0.113	-0.167	0.995	1.079	0.968	-0.063	-0.133	-0.0595	0.215516	-0.285667	8.58e-05	0.874	3.29e-06	-1.09917	26	20	55815.8	44.5
P09958	P09958	FURIN	Endoplasmic Reticulum	0.018	0.066	0.008	0.008	0.024	0.12	-0.117	-0.192	-0.094	0.018	-0.011	-0.0325	0.966475	0.02	0.0117709	-0.165	0.0230412	0.125833	17	16	87931.6	24.9
P09960	P09960	LTA4H	General	0.094	-0.004	0	0.045	0.052	0.022	-0.146	-0.11	-0.21	0.067	0.048	0.0735	0.985852	0.00966667	0.0125474	-0.185333	0.00189835	0.218167	114	47	69911.6	73.9
P09972	P09972	ALDOC	General	0.04	0.029	0.073	0.017	0.002	-0.013	0.081	0.011	0.005	-0.129	-0.13	-0.1315	0.851781	-0.0453333	0.738434	-0.015	0.00505419	-0.1625	43	31	39854.5	76.6
P0C091	P0C091	FREM3	General	0.084	-0.047	-0.115	-0.044	0.005	0.099	-0.089	-0.111	-0.22	0.089	-0.079	0.1505	0.943258	0.046	0.171008	-0.114	0.0385981	0.1935	7	6	239087	2.9
P0C0S5	P0C0S5	H2AFZ	General	0.072	-0.016	0.003	0.064	-0.014	0.133	-0.101	-0.073	0.07	-0.033	0.052	0.0125	0.933873	0.0413333	0.434229	-0.0543333	0.487113	0.0451667	25	8	13552.5	61.7
P0C1Z6	P0C1Z6	TFPT	General	-0.012	0.005	-0.11	0.016	-0.024	-0.007	0.04	-0.019	-0.01	0.115	0.053	-0.0915	0.934234	0.034	0.421519	0.0426667	0.760326	0.0218333	9	7	28334.9	24.1
P0C2W1	P0C2W1	FBXO45	General	-0.008	-0.002	0.004	-0.052	0.031	-0.058	0.196	0.291	0.234	-0.04	-0.027	-0.0885	0.943558	-0.0243333	0.00185511	0.242333	0.000603633	-0.292167	4	4	31202.7	13.9
P0C7P0	P0C7P0	CISD3	Mitochondria	0.05	0.069	-0.054	-0.025	-0.012	-0.058	0.255	0.225	0.272	-0.038	-0.065	0.0505	0.886515	-0.0533333	0.00494781	0.229	0.00114573	-0.268167	10	5	14557.6	37.7
P0C7T5	P0C7T5	ATXN1L	General	0.023	0.105	0.011	-0.038	-0.053	0.096	-0.074	-0.096	-0.015	-0.142	-0.069	-0.0845	0.934234	-0.0446667	0.0611012	-0.108	0.426421	-0.0368333	10	10	73818.4	16.4
P0C7V0	P0C7V0	LINC00271	General	-0.057	-0.038	-0.098	-0.104	0.103	0.01	0.201	0.207	0.119	0.042	0.087	-0.0505	0.895252	0.0673333	0.00267717	0.24	0.0274881	-0.1495	4	2	29487.7	7.3
P0C7X5	P0C7X5	ZNF806	General	0.114	0.072	-0.139	-0.094	0.108	-0.022	-0.115	-0.214	-0.305	0.075	-0.026	0.0805	0.987762	-0.0183333	0.0543791	-0.227	0.00692177	0.2545	8	5	69461.5	6.1
P0C874	P0C874	SPATA31D3	General	0.272	0.071	-0.152	0.207	-0.448	0.149	-0.423	-1.242	-0.574	-0.667	-0.687	0.2155	0.966475	-0.0943333	0.0241214	-0.81	0.31678	0.366833	3	3	103444	5.2
P0CB33	P0CB33	ZNF735	General	0.03	0.005	0.018	0.147	0.011	-0.045	-0.041	-0.035	-0.111	-0.03	-0.052	-0.0955	0.97357	0.02	0.0827433	-0.08	0.94809	0.00316667	4	11	49162.1	14
P0CG00	P0CG00	ZSCAN5DP	General	-0.044	0.229	-0.469	-0.046	0.017	-0.005	-0.024	-0.693	-0.583	0.146	0.113	0.1265	0.966475	0.0833333	0.26671	-0.338667	0.01875	0.561833	5	3	57384	9.6
P0CG08	P0CG08	GPR89B	General	-0.166	-0.035	0.014	0.029	0.067	0.025	0.106	-0.046	-0.062	0.035	0.06	-0.0735	0.815969	0.102667	0.467636	0.0616667	0.919983	0.00783333	11	7	53201.3	15.1
P0CG12	P0CG12	CHTF8	General	-0.006	0.015	0.035	0.054	0.001	0.057	-0.074	-0.117	-0.005	0.008	-0.028	0.0545	0.94094	0.0226667	0.120796	-0.08	0.148081	0.0768333	15	11	51390.4	36
P0CG13	P0CG13	CHTF8	General	0.057	-0.1	-0.157	-0.053	0.025	0.035	-0.013	-0.06	-0.205	0.093	0.099	0.1135	0.902192	0.069	0.791168	-0.026	0.0150204	0.1945	12	7	13370.4	43.8
P0CG30	P0CG30	GSTT2B	General	0.016	-0.086	-0.068	-0.008	0.029	-0.009	-0.017	-0.036	-0.124	0.076	0.082	0.0275	0.886082	0.05	0.827843	-0.013	0.0330651	0.120833	17	9	27677.6	45.9
P0CG38	P0CG38	POTEI	General	0.034	-0.212	-0.123	-0.151	-0.103	-0.167	0.034	0.066	0.069	0.008	0.107	0.1045	0.951514	-0.04	0.0810816	0.156667	0.73179	0.0168333	2	16	122935	13.7
P0CK97	P0CK97	SLC35E2	General	0.005	0.108	0.14	0.091	-0.217	-0.026	-0.132	0.029	-0.209	0.03	-0.057	0.0195	0.855083	-0.135	0.0617643	-0.188333	0.204051	0.1015	8	4	29363.6	17.2
P0CW18	P0CW18	PRSS56	Endoplasmic Reticulum	-0.039	0.09	0.038	0.111	0.123	0.152	-0.466	-0.549	-0.592	0.099	0.178	0.0355	0.77479	0.099	0.000283404	-0.565333	6.12e-05	0.639833	93	40	65623	70.1
P0DI82	P0DI82	TRAPPC2B	Endoplasmic Reticulum	-0.034	-0.021	-0.069	-0.06	0.003	0.019	-0.001	0.074	0.12	0.125	0.138	0.0135	0.936563	0.0286667	0.0650523	0.105667	0.654465	0.0278333	9	7	16444.4	36.4
[truncated: 7,613 more rows]

## Sheet: Results_MitoNormed
UniprotID	Isoform	Symbol	Localization	s127N_Control	s127C_Control	s129C_Control	s129N_OE	s130C_OE	s132N_OE	s126C_KD	s131N_KD	s131C_KD	s128N_Rescue	s128C_Rescue	s130N_Rescue	OEvsControl_adjP	OEvsControl_logFC	KDvsControl_adjPval	KDvsControl_logFC	RescueVsKD_adjPval	RescueVsKD_logFC
A0A024R4E5	A0A024R4E5	HDLBP	General	0.0206164	-0.0125096	0.118492	0.0829775	-0.0192531	0.0694477	-0.175134	-0.119271	-0.146096	-0.0384747	0.00506187	0.0167233	0.998425	0.00219123	0.0129265	-0.189033	0.0108776	0.14127
A0A024R644	A0A024R644	CLN5	General	-0.0383836	-0.0755096	0.0204916	0.0569775	-0.0122531	0.113448	-0.204134	-0.174271	-0.118096	0.0745253	0.178062	0.119723	0.998425	0.0838579	0.0533255	-0.134366	0.000576372	0.289604
A0A024RAC6	A0A024RAC6	ELOA	General	0.0366164	-0.000509561	0.104492	0.0739775	-0.0782531	0.0544477	-0.168134	-0.0872711	-0.100096	-0.0664747	0.0320619	0.00872329	0.998425	-0.0301421	0.0232887	-0.165366	0.0536238	0.109937
A0A075B6F3	A0A075B6F3	DNAH8	General	0.140616	-0.0255096	-0.116508	0.0159775	0.0157469	-0.151552	-0.0891339	-0.106271	-0.199096	-0.130475	0.102062	0.102723	0.998425	-0.0394754	0.123907	-0.131033	0.0714922	0.15627
A0A075B6F9	A0A075B6F9	NOSIP	General	-0.0373836	-0.0785096	0.0644916	0.0499775	0.0247469	-0.000552306	0.00186614	0.0737289	0.0469044	-0.0404747	-0.123938	0.0157233	0.998425	0.0418579	0.406855	0.057967	0.12069	-0.0903963
A0A075B730	A0A075B730	EPPK1	General	0.198616	0.0334904	0.130492	0.140978	-0.115253	0.196448	-0.314134	-0.314271	-0.143096	0.00552531	-0.00593813	0.133723	0.998425	-0.0468088	0.0004893	-0.378033	0.00256971	0.301604
A0A075B746	A0A075B746	MRPS21	General	0.0556164	0.0464904	0.0334916	-0.0380225	-0.0312531	-0.0445523	0.0488661	0.0597289	-0.0120956	-0.0974747	-0.0649381	-0.00527672	0.998425	-0.0831421	0.850965	-0.013033	0.0973126	-0.088063
A0A075B747	A0A075B747	BAHCC1	General	0.0956164	0.0554904	0.168492	0.0289775	-0.0172531	0.00144769	-0.0541339	0.0297289	-0.0120956	-0.0944747	-0.100938	0.0277233	0.998425	-0.102142	0.086339	-0.1187	0.450037	-0.0437297
A0A075B7D9	A0A075B7D9	TAF15	General	0.567616	-0.21051	0.297492	0.320978	-0.636253	0.607448	-0.361134	-0.790271	-0.0300956	-0.357475	-0.197938	0.308723	0.998425	-0.120809	0.0157605	-0.612033	0.218124	0.311604
A0A075B7F8	A0A075B7F8	POM121C	General	-0.0753836	-0.0545096	0.100492	0.0739775	-0.0242531	0.0804477	-0.0221339	-0.123271	-0.0980956	-0.0234747	0.0660619	0.0547233	0.998425	0.0531912	0.345352	-0.0713663	0.0519815	0.113604
A0A075B7G2	A0A075B7G2	ZNF208	General	0.0866164	-0.10451	0.0304916	-0.139022	-0.121253	-0.0985523	0.218866	0.148729	-0.0960956	0.00352531	0.225062	0.244723	0.998425	-0.123809	0.383315	0.0863003	0.541876	0.0672703
A0A08711	A0A08711	GAGE13	General	-0.157384	-0.0555096	0.0804916	0.0199775	0.0457469	0.0414477	-0.168134	0.0497289	-0.115096	-0.000474691	-0.0319381	0.0617233	0.998425	0.0798579	0.721686	-0.0336997	0.229379	0.0876037
A0A08719	A0A08719	CNTNAP3B	General	-0.681384	0.13749	0.736492	0.422978	-0.314253	-0.0585523	-0.0271339	0.385729	0.310904	-0.788475	-0.313938	-0.807277	0.998425	-0.0474754	0.611289	0.158967	0.00105053	-0.85973
A0A08727	A0A08727	ZMIZ2	General	0.108616	-0.00150956	0.0964916	-0.0010225	-0.0702531	0.0934477	-0.0791339	-0.0952711	-0.197096	-0.0264747	0.0880619	-0.0262767	0.998425	-0.0604754	0.0146803	-0.1917	0.0414619	0.135604
A0A08765	A0A08765	SRCIN1	General	0.0296164	0.0384904	0.0214916	0.0019775	-0.0262531	0.0874477	-0.0621339	-0.0722711	-0.0530956	0.0145253	0.112062	0.0297233	0.998425	-0.00880877	0.136839	-0.0923663	0.0348141	0.114604
A0A08769	A0A08769	PHF19	General	0.0186164	-0.0735096	-0.00750844	0.0059775	-0.0692531	0.0414477	-0.0411339	-0.0622711	-0.0260956	-0.0494747	0.0100619	-0.0102767	0.998425	0.0135246	0.741701	-0.0223663	0.556106	0.0266037
A0A087I8	A0A087I8	ARMC9	General	0.0516164	-0.0765096	-0.00750844	-0.0390225	0.00774691	0.0604477	-0.133134	-0.192271	-0.272096	0.0715253	0.0180619	0.0607233	0.998425	0.0205246	0.0176213	-0.188366	0.00159637	0.24927
A0A087K6	A0A087K6	KLF13	General	-0.00238358	0.0454904	0.114492	0.0679775	-0.0242531	0.152448	-0.327134	-0.189271	-0.105096	-0.0224747	0.0270619	-0.00227671	0.998425	0.0128579	0.00539924	-0.2597	0.0118476	0.207937
A0A087N7	A0A087N7	NEB	General	0.0606164	-0.15951	-0.204508	-0.0280225	0.00374691	0.0394477	-0.190134	-0.171271	-0.149096	0.265525	0.166062	0.0337233	0.998425	0.106191	0.414106	-0.069033	0.00142277	0.32527
A0A087WSV8	A0A087WSV8	NUCB2	General	0.0196164	-0.0705096	0.0134916	0.0809775	-0.0282531	0.0784477	-0.141134	-0.0692711	-0.156096	-0.0434747	0.0340619	0.0527233	0.998425	0.0561912	0.107882	-0.1097	0.0240915	0.136604
A0A087WT08	A0A087WT08	ZNF221	General	-0.0463836	-0.0395096	-0.131508	-0.0960225	-0.0572531	0.0874477	-0.0871339	-0.0592711	0.111904	0.0395253	0.0340619	0.119723	0.998425	0.0505246	0.434839	0.060967	0.280595	0.075937
A0A087WT12	A0A087WT12	GPX4	General	0.192616	-0.12251	-0.0105084	-0.0090225	0.0397469	0.0354477	-0.309134	-0.314271	-0.409096	0.251525	0.155062	0.305723	0.998425	0.00219123	0.00157893	-0.364033	2.87e-05	0.581604
A0A087WT20	A0A087WT20	DCAF13	General	0.0386164	-0.0195096	0.0484916	-0.0160225	-0.0582531	0.0594477	-0.0871339	-0.0532711	-0.0150956	-0.0234747	0.0650619	0.0127233	0.998425	-0.0274754	0.249731	-0.0743663	0.169207	0.069937
A0A087WT23	A0A087WT23	UBXN8	General	-0.0403836	-0.0495096	0.0444916	-0.0280225	0.0137469	0.0114477	-0.0501339	-0.0802711	-0.103096	0.00752531	0.164062	0.0757233	0.998425	0.0141912	0.340144	-0.0626997	0.0169766	0.16027
A0A087WT67	A0A087WT67	ZNF195	General	0.0206164	-0.0505096	0.0754916	-0.0210225	-0.0592531	0.00644769	-0.00813386	-0.0132711	-0.0380956	0.0225253	0.0370619	0.0277233	0.998425	-0.0398088	0.60758	-0.035033	0.253359	0.048937
A0A087WTU7	A0A087WTU7	DMD	General	0.0766164	-0.0725096	0.0944916	-0.0610225	-0.0782531	0.0474477	0.0508661	-0.119271	-0.176096	0.108525	-0.0199381	0.0387233	0.998425	-0.0634754	0.184614	-0.114366	0.118057	0.123937
A0A087WTW0	A0A087WTW0	UHRF1	General	0.000616423	-0.00450956	0.101492	-0.0190225	-0.150253	-0.00655231	0.0828661	0.154729	0.233904	-0.0904747	0.00806187	-0.0252767	0.998425	-0.0911421	0.0923082	0.124634	0.00886462	-0.193063
A0A087WU02	A0A087WU02	ERGIC2	General	-0.0643836	-0.0185096	0.0464916	0.0189775	0.0527469	-0.0805523	-0.0221339	0.0697289	-0.0810956	0.0135253	0.0960619	0.0747233	0.998425	0.00919123	0.991278	0.000967004	0.223341	0.0726037
A0A087WU53	A0A087WU53	MAGT1	Endoplasmic Reticulum	-0.139384	-0.0295096	0.116492	0.0829775	0.0877469	0.0164477	-0.0191339	-0.104271	-0.247096	0.0355253	0.117062	-0.0272767	0.998425	0.0798579	0.251461	-0.106033	0.0489383	0.16527
A0A087WUB9	A0A087WUB9	CTNNBL1	General	-0.0573836	-0.0435096	0.0874916	0.0299775	-0.0462531	0.0394477	-0.0441339	0.0247289	0.0269044	-0.0524747	-0.0229381	0.0147233	0.998425	0.0121912	0.932067	0.006967	0.645975	-0.0227297
A0A087WUD1	A0A087WUD1	ZNF787	General	0.0196164	-0.00550956	0.0264916	0.0269775	-0.0382531	0.0854477	-0.155134	-0.161271	-0.0310956	-0.0824747	0.0450619	0.0997233	0.998425	0.0111912	0.0671072	-0.129366	0.0687993	0.136604
A0A087WUW9	A0A087WUW9	ARL15	General	-0.0953836	0.0584904	0.0834916	0.0159775	0.168747	0.00844769	-0.202134	-0.0622711	-0.0950956	-0.0234747	0.00506187	-0.0702767	0.998425	0.0488579	0.0909397	-0.135366	0.127132	0.0902703
A0A087WV53	A0A087WV53	SPEG	General	0.103616	0.85049	0.0974916	0.910978	-0.101253	-0.213552	-0.159134	0.615729	0.674904	-0.278475	-0.307938	-0.420277	0.998425	-0.151809	0.929596	0.0266337	0.0102702	-0.71273
A0A087WV86	A0A087WV86	BORA	General	-0.00138358	-0.0475096	0.0954916	0.0519775	-0.0502531	0.221448	-0.0871339	-0.00427109	-0.0240956	-0.0444747	-0.128938	0.0437233	0.998425	0.0588579	0.442903	-0.054033	0.943222	-0.00472966
A0A087WVC6	A0A087WVC6	PTPRJ	General	-0.0623836	-0.10151	-0.0405084	-0.0160225	0.0677469	-0.0765523	0.00286614	0.0187289	-0.0960956	0.00752531	0.151062	0.0997233	0.998425	0.0598579	0.525884	0.0433003	0.08795	0.110937
A0A087WVP1	A0A087WVP1	FAT1	General	-0.0543836	-0.0975096	0.0144916	-0.0050225	-0.0272531	0.00744769	0.261866	0.258729	0.235904	-0.00647469	0.0600619	0.0297233	0.998425	0.0375246	0.000628713	0.297967	0.000990555	-0.224396
A0A087WVQ6	A0A087WVQ6	CLTC	General	0.00361642	-0.0425096	0.0574916	0.0329775	-0.0142531	0.0764477	-0.158134	-0.0902711	-0.130096	0.0345253	0.0790619	0.0367233	0.998425	0.0255246	0.0542134	-0.132366	0.00389058	0.17627
A0A087WVU4	A0A087WVU4	NBPF14	General	0.0776164	-0.0615096	0.0184916	-0.103022	-0.0762531	0.0724477	0.0628661	0.176729	0.175904	0.00452531	-0.00793813	-0.0742767	0.998425	-0.0471421	0.0865531	0.126967	0.0134017	-0.164396
A0A087WW63	A0A087WW63	CACNA1A	General	0.215616	-0.56051	-0.714508	-0.699022	0.0407469	-0.0695523	0.113866	-0.153271	-0.598096	0.541525	0.246062	0.407723	0.998425	0.110525	0.588022	0.140634	0.00888656	0.610937
A0A087WW66	A0A087WW66	PSMD1	General	0.0326164	-0.0645096	0.0804916	0.0289775	-0.0352531	0.0534477	-0.0921339	-0.0932711	-0.116096	-0.0304747	0.0450619	0.0287233	0.998425	-0.000475441	0.0943278	-0.1167	0.0276829	0.114937
A0A087WW83	A0A087WW83	GPR179	General	0.166616	-0.0665096	0.0814916	-0.0550225	0.00374691	0.0674477	-0.179134	-0.191271	-0.173096	0.145525	0.0320619	0.0327233	0.998425	-0.0551421	0.00701381	-0.2417	0.00117788	0.25127
A0A087WWL5	A0A087WWL5	ZSWIM9	General	0.0366164	0.0424904	0.0894916	-0.0250225	-0.0112531	0.0704477	-0.134134	-0.0892711	-0.0420956	0.0175253	0.0350619	-0.0312767	0.998425	-0.0448088	0.0361459	-0.1447	0.0714868	0.0956037
A0A087WWM1	A0A087WWM1	MUC1	General	-0.108384	-0.0205096	-0.230508	-0.245022	-0.0472531	-0.0885523	-0.00913386	-0.0492711	-0.0380956	0.207525	0.167062	0.136723	0.998425	-0.00714211	0.242456	0.0876337	0.00186353	0.202604
A0A087WWT0	A0A087WWT0	JPH4	General	0.00661642	0.0214904	0.0954916	-0.0030225	0.00574691	0.0314477	0.0778661	-0.0602711	-0.0770956	-0.0614747	-0.129938	-0.0692767	0.998425	-0.0298088	0.403113	-0.061033	0.273371	-0.067063
A0A087WWW9	A0A087WWW9	BCL10	General	0.0736164	-0.000509561	0.166492	0.109978	0.0167469	0.220448	-0.193134	-0.112271	-0.152096	-0.112475	-0.106938	0.0497233	0.998425	0.0358579	0.00561979	-0.232366	0.141959	0.095937
A0A087WWZ6	A0A087WWZ6	PRDM11	General	-0.0353836	0.0334904	0.143492	0.0559775	-0.0632531	-0.0715523	-0.0731339	0.0707289	-0.0220956	-0.120475	-0.0109381	-0.100277	0.998425	-0.0734754	0.475011	-0.0553663	0.26091	-0.069063
A0A087WX23	A0A087WX23	PEG10	General	0.0646164	0.0424904	0.125492	0.0999775	0.0377469	0.0924477	-0.509134	-0.478271	-0.535096	0.0485253	0.0420619	0.0307233	0.998425	-0.000808774	2.14e-06	-0.585033	5.76e-06	0.547937
A0A087WX45	A0A087WX45	IQCE	General	0.192616	-0.13251	-0.290508	0.0469775	-0.129253	0.153448	-0.219134	-0.264271	-0.606096	0.217525	0.0350619	0.174723	0.998425	0.100525	0.0565581	-0.286366	0.002167	0.505604
A0A087WX92	A0A087WX92	SLC16A6	General	-0.0683836	-0.00550956	0.0424916	-0.0010225	0.0987469	-0.103552	0.672866	0.619729	0.541904	-0.127475	-0.0739381	-0.145277	0.998425	0.00852456	2.58e-06	0.621967	4.18e-06	-0.727063
A0A087WXF8	A0A087WXF8	ZCCHC17	General	-0.0353836	-0.0465096	0.118492	0.0419775	-0.0382531	0.0274477	-0.0521339	-0.0472711	-0.0180956	-0.0744747	-0.0169381	-0.0142767	0.998425	-0.00180877	0.478814	-0.0513663	0.935315	0.00393701
A0A087WXK5	A0A087WXK5	ABCA2	General	0.0276164	0.14349	0.206492	0.0559775	0.0827469	0.0444477	-0.237134	-0.301271	-0.349096	-0.0224747	0.0660619	-0.0882767	0.998425	-0.0648088	0.00012888	-0.4217	0.00157884	0.280937
A0A087WXL3	A0A087WXL3	POLQ	General	0.0346164	0.0444904	0.106492	0.0779775	-0.0982531	0.0214477	-0.0711339	-0.0112711	0.000904387	-0.143475	-0.0209381	-0.0652767	0.998425	-0.0614754	0.173843	-0.089033	0.362869	-0.0493963
A0A087WY96	A0A087WY96	SLC6A6	General	-0.131384	0.0484904	0.0364916	-0.116022	0.0337469	-0.291552	0.426866	0.156729	0.0229044	-0.120475	0.0880619	-0.0742767	0.998425	-0.109142	0.0585644	0.217634	0.0620618	-0.23773
A0A087WYC6	A0A087WYC6	DNAH11	General	-0.0963836	-0.11351	0.0334916	-0.0120225	0.00874691	0.0364477	0.114866	0.0487289	0.0729044	-0.0204747	0.00606187	0.0237233	0.998425	0.0698579	0.0603702	0.137634	0.112305	-0.0757297
A0A087WYD6	A0A087WYD6	TAP2	General	-0.0313836	-0.0415096	0.0894916	0.0139775	-0.0112531	-0.0155523	0.236866	0.190729	0.112904	-0.106475	-0.0119381	-0.0402767	0.998425	-0.00980877	0.0255764	0.174634	0.0025365	-0.233063
A0A087WYF0	A0A087WYF0	ZCCHC17	General	0.0426164	-0.10051	-0.00550844	-0.0700225	-0.00225309	0.200448	-0.125134	-0.121271	-0.295096	0.121525	0.00706187	0.0397233	0.998425	0.0638579	0.0527294	-0.159366	0.00651649	0.236604
A0A087WYF7	A0A087WYF7	APOOL	General	-0.135384	0.0574904	0.0134916	0.0749775	0.136747	-0.0925523	-0.167134	-0.197271	-0.244096	0.128525	0.00206187	0.100723	0.998425	0.0611912	0.0254664	-0.181366	0.000920814	0.279937
A0A087WYL5	A0A087WYL5	SEZ6L2	General	-0.0913836	0.0514904	0.0354916	0.0469775	-0.000253093	-0.000552306	-0.109134	-0.0362711	-0.0670956	-0.00247469	0.0650619	-0.0462767	0.998425	0.0168579	0.325195	-0.0693663	0.156282	0.0762703
A0A087WYL7	A0A087WYL7	MED6	General	-0.00838358	-0.0725096	0.100492	-0.0270225	-0.0652531	0.0394477	0.0368661	0.0977289	0.0659044	-0.00147469	-0.0359381	-0.0272767	0.998425	-0.0241421	0.402219	0.0603003	0.065836	-0.0883963
A0A087WYM3	A0A087WYM3	SIRT2	General	0.185616	0.00349044	0.0814916	-0.0200225	-0.0252531	0.0144477	-0.193134	-0.0622711	-0.0940956	0.0605253	0.0450619	0.0507233	0.998425	-0.100475	0.0149283	-0.2067	0.00931263	0.168604
A0A087WYN9	A0A087WYN9	DHX29	General	0.0366164	-0.0375096	0.0764916	0.0199775	-0.0282531	0.0354477	-0.0771339	-0.0542711	-0.136096	0.0105253	0.0510619	0.00972328	0.998425	-0.0161421	0.0975035	-0.114366	0.0334633	0.112937
A0A087WYV9	A0A087WYV9	SYNJ2BP-CO6	General	-0.0163836	0.0304904	0.0804916	0.0789775	0.0567469	0.0294477	-0.0311339	-0.114271	-0.123096	-0.0284747	0.0590619	-0.0182767	0.998425	0.0235246	0.0806119	-0.121033	0.0940842	0.0936037
A0A087WYZ4	A0A087WYZ4	CGA	General	-0.235384	-0.38051	-0.236508	-0.0210225	-0.0432531	-0.0115523	1.24387	1.28973	1.1799	0.0925253	0.0620619	0.0847233	0.135365	0.258858	2.23e-09	1.52197	2.79e-07	-1.15806
A0A087WZM2	A0A087WZM2	RNASET2	General	-0.0473836	-0.0205096	0.0564916	0.0619775	-0.00825309	0.0894477	-0.109134	-0.0692711	-0.0810956	-0.145475	0.0220619	-0.0212767	0.998425	0.0515246	0.20824	-0.0826997	0.523297	0.0382703
A0A087WZN1	A0A087WZN1	IDH3B	General	-0.0403836	-0.0895096	-0.0885084	-0.0440225	-0.0262531	-0.133552	0.0958661	0.242729	0.271904	0.0305253	-0.0269381	0.0497233	0.998425	0.00485789	0.00213397	0.2763	0.0144827	-0.18573
A0A087WZQ7	A0A087WZQ7	NAPB	General	0.0556164	-0.0395096	0.0874916	0.0979775	-0.00825309	0.0344477	-0.193134	-0.119271	-0.128096	0.0475253	0.0540619	0.0747233	0.998425	0.00685789	0.0167055	-0.181366	0.00178936	0.205604
A0A087WZV0	A0A087WZV0	PPIP5K2	General	0.0896164	0.00849044	0.121492	0.0649775	-0.0152531	0.0764477	-0.218134	-0.185271	-0.194096	-0.0224747	0.00906187	0.0587233	0.998425	-0.0311421	0.00121957	-0.272366	0.00150942	0.21427
A0A087WZY3	A0A087WZY3	ALMS1	General	-0.0223836	-0.0325096	0.0534916	0.0409775	-0.0422531	0.0544477	-0.0571339	0.0237289	-0.00209561	-0.00847469	-0.0509381	-0.0352767	0.998425	0.0181912	0.876686	-0.0113663	0.681675	-0.0197297
A0A087X020	A0A087X020	SBDS	General	0.0556164	-0.10251	0.0724916	-0.0030225	-0.0442531	-0.0255523	-0.0571339	0.0277289	-0.0130956	-0.0454747	-0.0339381	0.0627233	0.998425	-0.0328088	0.774894	-0.0226997	0.880195	0.00860367
A0A087X080	A0A087X080	RYR3	General	0.00761642	0.0254904	0.0904916	-0.0790225	-0.0272531	0.0884477	0.0108661	-0.0972711	-0.0600956	0.0325253	0.0410619	0.0517233	0.998425	-0.0471421	0.183921	-0.090033	0.0826801	0.0906037
A0A087X0F7	A0A087X0F7	RIBC2	General	0.0746164	-0.0995096	-0.0965084	-0.0620225	0.0767469	0.107448	-0.0721339	-0.109271	-0.318096	0.0425253	0.114062	0.102723	0.998425	0.0811912	0.166526	-0.126033	0.0084676	0.252937
A0A087X0M4	A0A087X0M4	SLC4A1AP	General	-0.0173836	-0.0425096	0.0754916	0.0599775	-0.0582531	0.0484477	-0.131134	-0.0492711	-0.0630956	-0.0584747	-0.00293813	-0.00327671	0.998425	0.0115246	0.208601	-0.0863663	0.229605	0.0596037
A0A087X0N3	A0A087X0N3	NOL4L	General	-0.00338358	-0.0425096	0.143492	0.0129775	-0.0892531	-0.0105523	-0.0541339	-0.0762711	0.00890439	-0.138475	-0.0799381	-0.0322767	0.998425	-0.0614754	0.331159	-0.073033	0.418814	-0.043063
A0A087X0R0	A0A087X0R0	KDM6A	General	-0.0183836	-0.0265096	0.0974916	0.0069775	-0.0632531	0.0294477	-0.211134	-0.0202711	0.0249044	-0.0364747	-0.0339381	-0.0902767	0.998425	-0.0264754	0.304906	-0.0863663	0.844284	0.0152703
A0A087X0R6	A0A087X0R6	SN2	General	0.0826164	-0.0205096	0.129492	0.0839775	0.00674691	0.0344477	-0.201134	-0.155271	-0.262096	-0.0374747	-0.0589381	0.0357233	0.998425	-0.0221421	0.00224903	-0.270033	0.00653728	0.185937
A0A087X0S4	A0A087X0S4	KLF4	General	-0.0853836	0.0314904	0.276492	0.231978	-0.0412531	0.268448	-0.813134	-0.496271	-0.470096	-0.0974747	-0.0359381	0.0187233	0.998425	0.0788579	0.000176859	-0.667366	0.000672666	0.554937
A0A087X0T3	A0A087X0T3	MYH7B	General	0.469616	-0.0175096	0.0814916	0.334978	-0.350253	0.642448	-0.723134	-0.540271	-0.163096	0.0815253	-0.0729381	0.272723	0.998425	0.0311912	0.00169982	-0.653366	0.00622773	0.56927
A0A087X0V5	A0A087X0V5	OAS2	General	-0.101384	0.12849	0.196492	0.0359775	-0.202253	-0.124552	0.00486614	0.235729	0.103904	-0.0974747	0.0450619	-0.0732767	0.998425	-0.171475	0.696037	0.0403003	0.0617621	-0.15673
A0A087X0W7	A0A087X0W7	ACOT2	General	0.0526164	0.0234904	0.0274916	-0.0160225	-0.0382531	0.0304477	-0.0831339	-0.0432711	0.00990439	-0.0514747	-0.0749381	-0.0212767	0.998425	-0.0424754	0.253963	-0.0733663	0.838678	-0.0103963
A0A087X256	A0A087X256	WASHC4	General	0.0316164	-0.0145096	0.0654916	0.0259775	0.0127469	0.0714477	-0.213134	-0.172271	-0.291096	0.0415253	0.0790619	0.0297233	0.998425	0.00919123	0.0023618	-0.253033	0.000710773	0.275604
A0A087X266	A0A087X266	TMEM120A	General	-0.321384	0.0254904	0.156492	0.132978	0.124747	0.0234477	-0.0641339	-0.269271	-0.248096	-0.200475	0.0970619	-0.266277	0.998425	0.140191	0.239566	-0.147366	0.540257	0.0706037
A0A087X279	A0A087X279	IFIT2	General	0.387616	0.0574904	0.246492	-0.177022	-0.228253	-0.253552	1.34187	1.40173	1.2929	-0.181475	-0.233938	0.0407233	0.0178225	-0.450142	1.97e-07	1.11497	1.02e-06	-1.4704
A0A087X2A7	A0A087X2A7	FAM184A	General	-0.0453836	-0.0555096	0.104492	0.0279775	-0.0852531	0.000447694	0.153866	0.124729	0.117904	-0.0524747	0.0320619	-0.0902767	0.998425	-0.0201421	0.0751201	0.130967	0.00846156	-0.169063
A0A087X2F1	A0A087X2F1	ZSCAN26	General	0.00861642	-0.0425096	-0.0825084	-0.0290225	-0.00925309	0.0954477	-0.123134	-0.0962711	-0.125096	0.0615253	0.0400619	0.0577233	0.998425	0.0578579	0.237112	-0.076033	0.00331353	0.167937
A0A087X2I1	A0A087X2I1	PSMC6	General	0.0226164	-0.0445096	0.0874916	0.0479775	-0.0392531	0.0404477	-0.164134	-0.0942711	-0.0900956	-0.0124747	0.0230619	0.0487233	0.998425	-0.00547544	0.0544541	-0.138033	0.0165425	0.135937
A0A087Z3	A0A087Z3	PSME2	General	0.0366164	0.0134904	0.126492	-0.0170225	-0.00625309	0.00644769	-0.0941339	-0.0922711	-0.154096	0.0135253	-0.0189381	-0.0392767	0.998425	-0.0644754	0.0192675	-0.172366	0.0515118	0.0986037
A0A088AWN2	A0A088AWN2	WDR20	General	0.0576164	-0.13151	-0.113508	-0.124022	-0.0182531	-0.00855231	-0.137134	-0.0332711	-0.152096	0.0235253	0.0930619	0.109723	0.998425	0.0121912	0.57483	-0.045033	0.0083997	0.182937
A0A096LP01	A0A096LP01	SMIM26	General	0.138616	0.0744904	0.0474916	0.0669775	0.0667469	0.0504477	-0.207134	-0.428271	-0.449096	0.0505253	0.0980619	0.121723	0.998425	-0.0254754	0.000193501	-0.448366	0.000441443	0.451604
A0A096LPC5	A0A096LPC5	WASHC2C	General	0.0466164	0.0284904	0.158492	0.0759775	-0.00825309	0.162448	-0.305134	-0.220271	-0.321096	0.0295253	-0.0129381	0.0917233	0.998425	-0.00114211	0.000286021	-0.360033	0.00043846	0.31827
A0A096LPH6	A0A096LPH6	ZNF638	General	-0.0173836	-0.0525096	-0.0675084	-0.0990225	-0.0632531	0.155448	-0.209134	-0.111271	-0.121096	0.127525	0.107062	0.0587233	0.998425	0.0435246	0.128149	-0.101366	0.0012965	0.244937
A0A0A0MQ	A0A0A0MQ	MYO10	General	0.134616	0.0524904	0.100492	0.0219775	0.00674691	0.0544477	-0.264134	-0.297271	-0.380096	0.0535253	0.0650619	0.0607233	0.998425	-0.0681421	7.36e-05	-0.4097	0.00011468	0.373604
A0A0A0MQR2	A0A0A0MQR2	RTFDC1	General	0.0816164	-0.0365096	0.0794916	0.0779775	-0.0192531	0.102448	-0.239134	-0.219271	-0.224096	0.0125253	0.0670619	0.105723	0.998425	0.0121912	0.00149367	-0.269033	0.000334543	0.28927
A0A0A0MQS1	A0A0A0MQS1	PYCR3	General	-0.0253836	-0.0165096	0.110492	0.104978	-0.0452531	0.00744769	-0.0851339	0.0157289	0.0319044	-0.0864747	-0.0919381	-0.0462767	0.998425	-0.000475441	0.638789	-0.0353663	0.242348	-0.0623963
A0A0A0MQS2	A0A0A0MQS2	CLASRP	General	-0.0303836	-0.0215096	0.110492	0.0499775	-0.0812531	0.0374477	-0.129134	-0.0332711	0.0499044	-0.156475	-0.0529381	-0.0412767	0.998425	-0.0174754	0.466027	-0.057033	0.49305	-0.046063
A0A0A0MQS6	A0A0A0MQS6	CDH23	General	-0.0303836	-0.0535096	0.155492	0.187978	-0.122253	0.0144477	-0.108134	0.00572891	-0.00409561	-0.0674747	-0.0729381	-0.0522767	0.998425	0.00285789	0.464344	-0.0593663	0.581446	-0.0287297
A0A0A0MQU4	A0A0A0MQU4	SCLY	General	-0.0123836	0.00249044	0.129492	0.0979775	0.0547469	0.0934477	-0.240134	-0.163271	-0.202096	0.0225253	0.0610619	0.00572328	0.998425	0.0421912	0.00399279	-0.2417	0.00109385	0.231604
A0A0A0MQX8	A0A0A0MQX8	MBNL1	General	-0.00238358	-0.0265096	0.104492	0.0539775	-0.122253	0.0544477	-0.139134	-0.0932711	-0.0210956	-0.114475	-0.0359381	-0.0182767	0.998425	-0.0298088	0.129641	-0.1097	0.618009	0.0282703
A0A0A0MR	A0A0A0MR	ELAVL2	General	0.0996164	-0.0775096	-0.0175084	-0.0350225	0.0547469	0.0974477	-0.260134	-0.172271	-0.220096	0.0555253	0.0770619	0.101723	0.998425	0.0375246	0.00884108	-0.219033	0.000313518	0.295604
A0A0A0MR51	A0A0A0MR51	FADS1	General	-0.0463836	0.0414904	0.176492	0.0469775	0.0117469	0.0224477	-0.0431339	-0.112271	-0.111096	-0.188475	-0.000938133	-0.0552767	0.998425	-0.0301421	0.0689858	-0.146033	0.916486	0.00727034
A0A0A0MR57	A0A0A0MR57	ZNF836	General	-0.239384	-0.0385096	0.137492	-0.0820225	0.132747	-0.0835523	0.352866	0.328729	0.193904	-0.279475	-0.0529381	-0.100277	0.998425	0.0358579	0.00526269	0.338634	0.000668054	-0.436063
A0A0A0MR66	A0A0A0MR66	RBM10	General	-0.00438358	-0.0285096	0.0994916	0.0419775	-0.0762531	0.0234477	-0.0721339	-0.0712711	-0.0300956	-0.0734747	0.00906187	-0.0502767	0.998425	-0.0258088	0.237976	-0.080033	0.68713	0.0196037
A0A0A0MR74	A0A0A0MR74	DGAT1	General	0.135616	-0.0245096	0.0774916	0.172978	-0.0652531	0.175448	-0.348134	-0.291271	-0.120096	0.00652531	-0.0189381	0.107723	0.998425	0.0315246	0.00226625	-0.316033	0.00454978	0.284937
A0A0A0MR85	A0A0A0MR85	GSTM4	General	0.215616	-0.0115096	0.0294916	-0.209022	-0.0682531	-0.104552	0.187866	0.369729	0.206904	0.0465253	-0.0639381	0.123723	0.998425	-0.205142	0.0538524	0.176967	0.0161198	-0.219396
A0A0A0MRC0	A0A0A0MRC0	DCHS2	General	0.0406164	0.00149044	0.0634916	0.0129775	0.0267469	-0.145552	0.0908661	-0.0702711	-0.170096	-0.145475	-0.0299381	-0.00927671	0.998425	-0.0704754	0.299718	-0.085033	0.893884	-0.0117297
A0A0A0MRE9	A0A0A0MRE9	AKAP9	General	0.0996164	-0.000509561	0.187492	0.0889775	-0.0502531	0.186448	-0.278134	-0.314271	-0.194096	0.0495253	0.0720619	0.108723	0.998425	-0.0204754	0.000496138	-0.3577	0.000257482	0.338937
A0A0A0MRJ7	A0A0A0MRJ7	F5	General	-0.0323836	-0.18151	-0.0105084	-0.0850225	-0.0582531	-0.301552	1.53987	1.64373	1.3289	0.0325253	0.152062	0.0877233	0.998425	-0.0734754	1.09e-08	1.57897	1.82e-06	-1.4134
A0A0A0MRN1	A0A0A0MRN1	HENMT1	General	0.0186164	-0.0415096	0.116492	-0.0060225	-0.0322531	-0.110552	0.225866	0.199729	0.190904	-0.122475	-0.118938	-0.0332767	0.998425	-0.0808088	0.0212926	0.1743	0.000338784	-0.297063
A0A0A0MRP2	A0A0A0MRP2	FPGT	General	0.101616	-0.0245096	0.0914916	0.0309775	0.0547469	0.108448	-0.222134	-0.178271	-0.375096	0.0505253	0.0720619	0.0247233	0.998425	0.00852456	0.00157893	-0.3147	0.00134353	0.307604
A0A0A0MRR7	A0A0A0MRR7	SNRPC	General	0.0286164	-0.0355096	0.0924916	0.0739775	-0.0402531	-0.0465523	-0.0101339	-0.0662711	-0.0650956	-0.0754747	-0.0209381	0.0767233	0.998425	-0.0328088	0.262928	-0.0756997	0.483403	0.0406037
A0A0A0MS24	A0A0A0MS24	PPP1R12B	General	0.00361642	0.00849044	0.0524916	0.0589775	-0.0612531	0.113448	-0.0881339	-0.0982711	-0.0390956	-0.00147469	0.0410619	0.0267233	0.998425	0.0155246	0.131956	-0.0966997	0.0493782	0.0972703
A0A0A0MS69	A0A0A0MS69	PDE1C	General	0.0996164	0.0614904	-0.107508	-0.0940225	0.167747	-0.0735523	-0.196134	-0.225271	-0.204096	0.120525	0.269062	0.0377233	0.998425	-0.0178088	0.00887997	-0.226366	0.000955715	0.350937
A0A0A0MSA3	A0A0A0MSA3	MAGEB16	General	0.000616423	-0.0165096	0.0574916	0.0089775	0.0427469	-0.000552306	-0.107134	-0.110271	-0.113096	-0.000474691	0.0120619	0.0177233	0.998425	0.00319123	0.0590978	-0.124033	0.0152289	0.119937
A0A0A0MSF9	A0A0A0MSF9	GPATCH11	General	-0.00238358	-0.0445096	0.0754916	0.0629775	-0.0292531	0.0524477	-0.100134	-0.0322711	-0.0720956	-0.0834747	-0.0269381	-0.0112767	0.998425	0.0191912	0.248784	-0.0776997	0.570611	0.0276037
A0A0A0MSG2	A0A0A0MSG2	FHL2	General	0.0986164	0.0344904	0.210492	0.0629775	-0.0232531	0.0494477	-0.218134	-0.187271	-0.293096	-0.0444747	0.0490619	0.0607233	0.998425	-0.0848088	0.000510186	-0.347366	0.00161043	0.254604
A0A0A0MSJ9	A0A0A0MSJ9	RASA2	General	0.0866164	-0.00750956	0.101492	0.000977503	0.00274691	0.0784477	-0.191134	-0.145271	-0.181096	0.0425253	0.0110619	0.0457233	0.998425	-0.0328088	0.00346998	-0.2327	0.00140768	0.205604
A0A0A0MSK2	A0A0A0MSK2	PET100	General	0.0966164	0.0204904	0.120492	0.0659775	-0.0412531	-0.0415523	-0.0911339	-0.132271	-0.0790956	-0.0534747	-0.00593813	-0.0632767	0.998425	-0.0848088	0.0139083	-0.180033	0.200826	0.059937
A0A0A0MSK4	A0A0A0MSK4	GPSM1	General	0.0756164	0.0194904	0.221492	0.0549775	-0.0602531	0.0254477	-0.160134	-0.0852711	-0.102096	-0.0664747	-0.0539381	-0.0642767	0.998425	-0.0988088	0.0100141	-0.221366	0.24067	0.0542703
A0A0A0MSS8	A0A0A0MSS8	AKR1C3	General	0.00761642	-0.0635096	0.0934916	-0.0510225	-0.0932531	-0.00455231	-0.147134	0.806729	0.490904	0.0605253	-0.0449381	0.0817233	0.998425	-0.0621421	0.0814175	0.370967	0.150114	-0.351063
A0A0A0MSW5	A0A0A0MSW5	ZNF778	General	0.0406164	0.0264904	0.0494916	0.0159775	-0.137253	0.0214477	-0.0811339	0.0577289	0.277904	-0.0684747	-0.0709381	-0.131277	0.998425	-0.0721421	0.639551	0.045967	0.0876421	-0.175063
A0A0A0MT33	A0A0A0MT33	SCAF8	General	-0.00338358	-0.0265096	0.0844916	0.0219775	-0.0532531	0.0354477	-0.0731339	-0.0452711	-0.0220956	-0.0744747	0.0190619	-0.0262767	0.998425	-0.0168088	0.328402	-0.065033	0.693576	0.0196037
A0A0A0MT49	A0A0A0MT49	SMARCA4	General	-0.0933836	0.0444904	0.0554916	-0.105022	-0.0912531	-0.0395523	0.0528661	0.0967289	0.0919044	0.0445253	-0.0639381	-0.131277	0.998425	-0.0808088	0.265945	0.0783003	0.0474013	-0.13073
A0A0A0MT72	A0A0A0MT72	CCM2	General	-0.0263836	0.0444904	-0.0385084	0.113978	-0.0962531	0.0504477	-0.260134	-0.252271	-0.0330956	0.0235253	-0.0869381	0.142723	0.998425	0.0295246	0.0431654	-0.175033	0.0404425	0.20827
A0A0A0MT77	A0A0A0MT77	DNAJC24	General	0.0396164	-0.0795096	0.109492	-0.0070225	0.0357469	0.0284477	-0.0971339	-0.161271	-0.0410956	-0.0594747	-0.0979381	0.0637233	0.998425	-0.00414211	0.111816	-0.123033	0.29026	0.0686037
A0A0A0MT83	A0A0A0MT83	IVD	General	0.0416164	-0.00250956	-0.0575084	-0.0170225	-0.0142531	0.0204477	0.0298661	0.0347289	0.0749044	-0.0434747	-0.0809381	-0.0402767	0.998425	0.00252456	0.421302	0.0526337	0.0393937	-0.101396
A0A0A0MTH3	A0A0A0MTH3	ILK	General	0.0536164	-0.0445096	0.141492	0.0459775	-0.0332531	0.0334477	-0.0901339	-0.0612711	-0.125096	-0.0184747	-0.0289381	-0.00127672	0.998425	-0.0348088	0.0602426	-0.142366	0.104653	0.075937
A0A0A0MTH9	A0A0A0MTH9	BTAF1	General	0.0286164	-0.0325096	0.0514916	0.0099775	-0.0322531	0.0564477	-0.129134	-0.0802711	-0.131096	0.0365253	0.0700619	0.0557233	0.998425	-0.00447544	0.0551024	-0.129366	0.00414119	0.167604
A0A0A0MTJ9	A0A0A0MTJ9	NCEH1	General	-0.00338358	-0.0225096	0.142492	0.0279775	-0.000253093	0.0594477	-0.0661339	-0.173271	-0.226096	-0.130475	0.0930619	0.0387233	0.998425	-0.00980877	0.0226198	-0.194033	0.0672921	0.155604
A0A0A0MTL5	A0A0A0MTL5	SKP2	General	0.106616	-0.0445096	0.0674916	-0.0060225	-0.0322531	0.0614477	-0.119134	-0.0762711	-0.175096	-0.0284747	0.0140619	0.0197233	0.998425	-0.0354754	0.0301324	-0.1667	0.0258204	0.12527
A0A0A0MTQ8	A0A0A0MTQ8	CCDC175	General	0.0306164	-0.0465096	0.000491564	-0.0380225	-0.0512531	0.0754477	0.0168661	-0.0982711	-0.125096	0.0525253	0.125062	0.00272329	0.998425	0.000524559	0.365947	-0.0636997	0.0555359	0.128937
A0A0A0MTR7	A0A0A0MTR7	RNF213	General	0.00761642	-0.0465096	0.0444916	-0.0050225	-0.0102531	0.0364477	-0.0761339	-0.0392711	-0.120096	0.0585253	0.113062	-0.0162767	0.998425	0.00519123	0.22418	-0.0803663	0.03457	0.13027
A0A0A6YY96	A0A0A6YY96	IREB2	General	0.0676164	-0.0575096	0.0954916	-0.0150225	-0.0842531	-0.00655231	0.0858661	0.170729	0.0809044	-0.0454747	-0.0689381	-0.0282767	0.998425	-0.0704754	0.285717	0.0773003	0.00830178	-0.160063
A0A0B4J1S3	A0A0B4J1S3	BIRC5	General	-0.0273836	-0.0625096	0.0904916	0.0109775	-0.114253	0.0474477	0.284866	0.345729	0.366904	-0.0944747	-0.0569381	-0.00527672	0.998425	-0.0188088	0.000523778	0.3323	0.000103593	-0.38473
A0A0B4J1S4	A0A0B4J1S4	SELENOF	General	-0.0173836	0.0434904	0.0984916	0.0459775	0.000746907	0.00144769	-0.0711339	-0.124271	-0.201096	0.000525309	0.117062	0.0347233	0.998425	-0.0254754	0.023325	-0.1737	0.0108086	0.182937
A0A0B4J1T8	A0A0B4J1T8	EPHA6	General	-0.000383577	-0.0395096	-0.00350844	-0.148022	-0.00125309	0.0794477	-0.172134	-0.136271	-0.0580956	0.137525	0.0720619	0.130723	0.998425	-0.00880877	0.109034	-0.1077	0.001755	0.235604
A0A0B4J1W0	A0A0B4J1W0	MED24	General	-0.0103836	-0.0565096	0.0144916	-0.0250225	-0.0382531	0.0644477	-0.00613386	-0.00227109	-0.0400956	-0.0184747	0.0820619	-0.0132767	0.998425	0.0178579	0.986799	0.00130034	0.517976	0.032937
A0A0B4J1Y2	A0A0B4J1Y2	TTC21A	General	0.0206164	-0.15651	-0.250508	-0.119022	-0.0242531	0.0574477	0.192866	0.198729	-0.129096	0.175525	0.0840619	0.0277233	0.998425	0.100191	0.0623662	0.2163	0.941414	0.00827034
[truncated: 9,476 more rows]

## Sheet: Results_ER-Normed
UniprotID	Isoform	Symbol	Localization	s127N_Control	s127C_Control	s129C_Control	s129N_OE	s130C_OE	s132N_OE	s126C_KD	s131N_KD	s131C_KD	s128N_Rescue	s128C_Rescue	s130N_Rescue	OEvsControl_adjP	OEvsControl_logFC	KDvsControl_adjPval	KDvsControl_logFC	RescueVsKD_adjPval	RescueVsKD_logFC
[truncated: 9,612 more rows]
