# Supplementary figures and images for: An engineered transcriptional reporter of protein localization identifies regulators of mitochondrial and ER membrane protein trafficking in high-throughput CRISPRi screens
Source: eLife journal article supplement (doi:10.7554/elife.69142), 2021-08-20

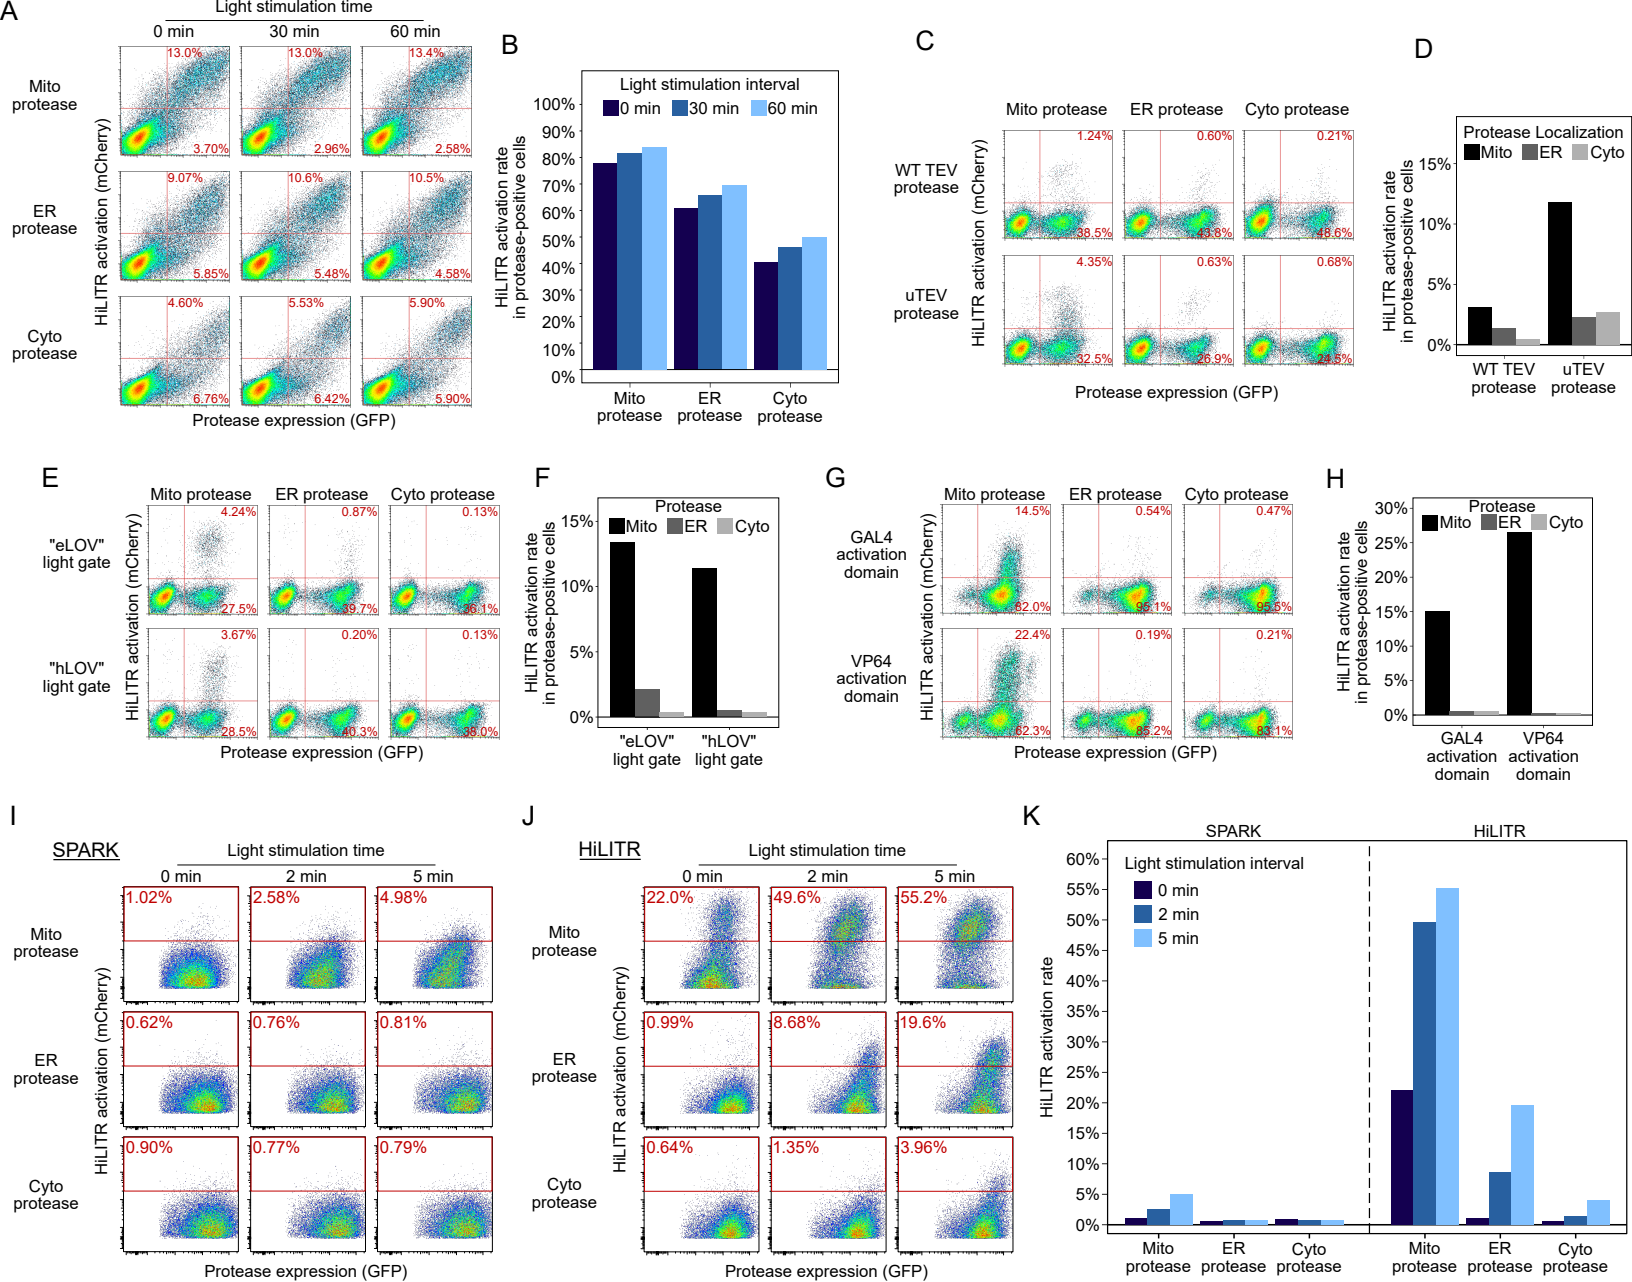

Supplement: supp [file elife_poa_e69142_Figure_1_figure_supplement_2.pdf › elife_poa_e69142_Figure_1_figure_supplement_2.pdf]

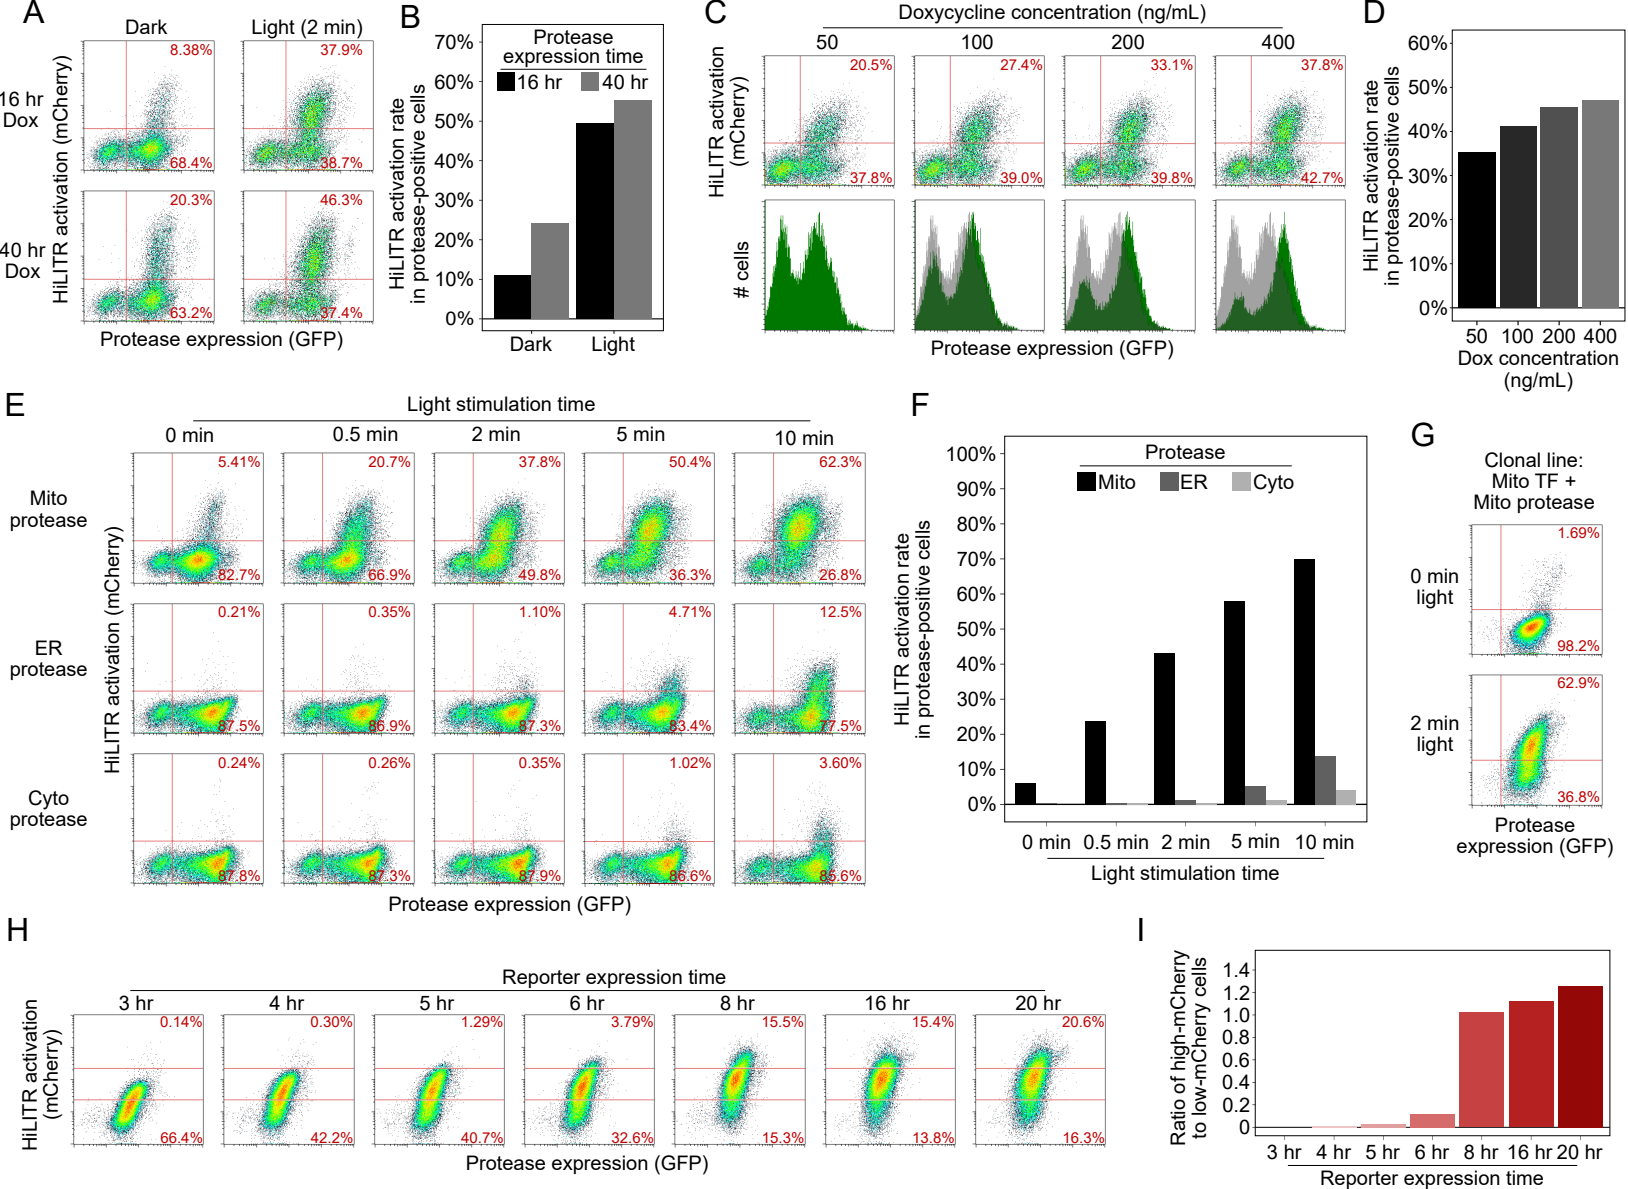

Supplement: supp [file elife_poa_e69142_Figure_1_figure_supplement_3.pdf › elife_poa_e69142_Figure_1_figure_supplement_3.pdf]

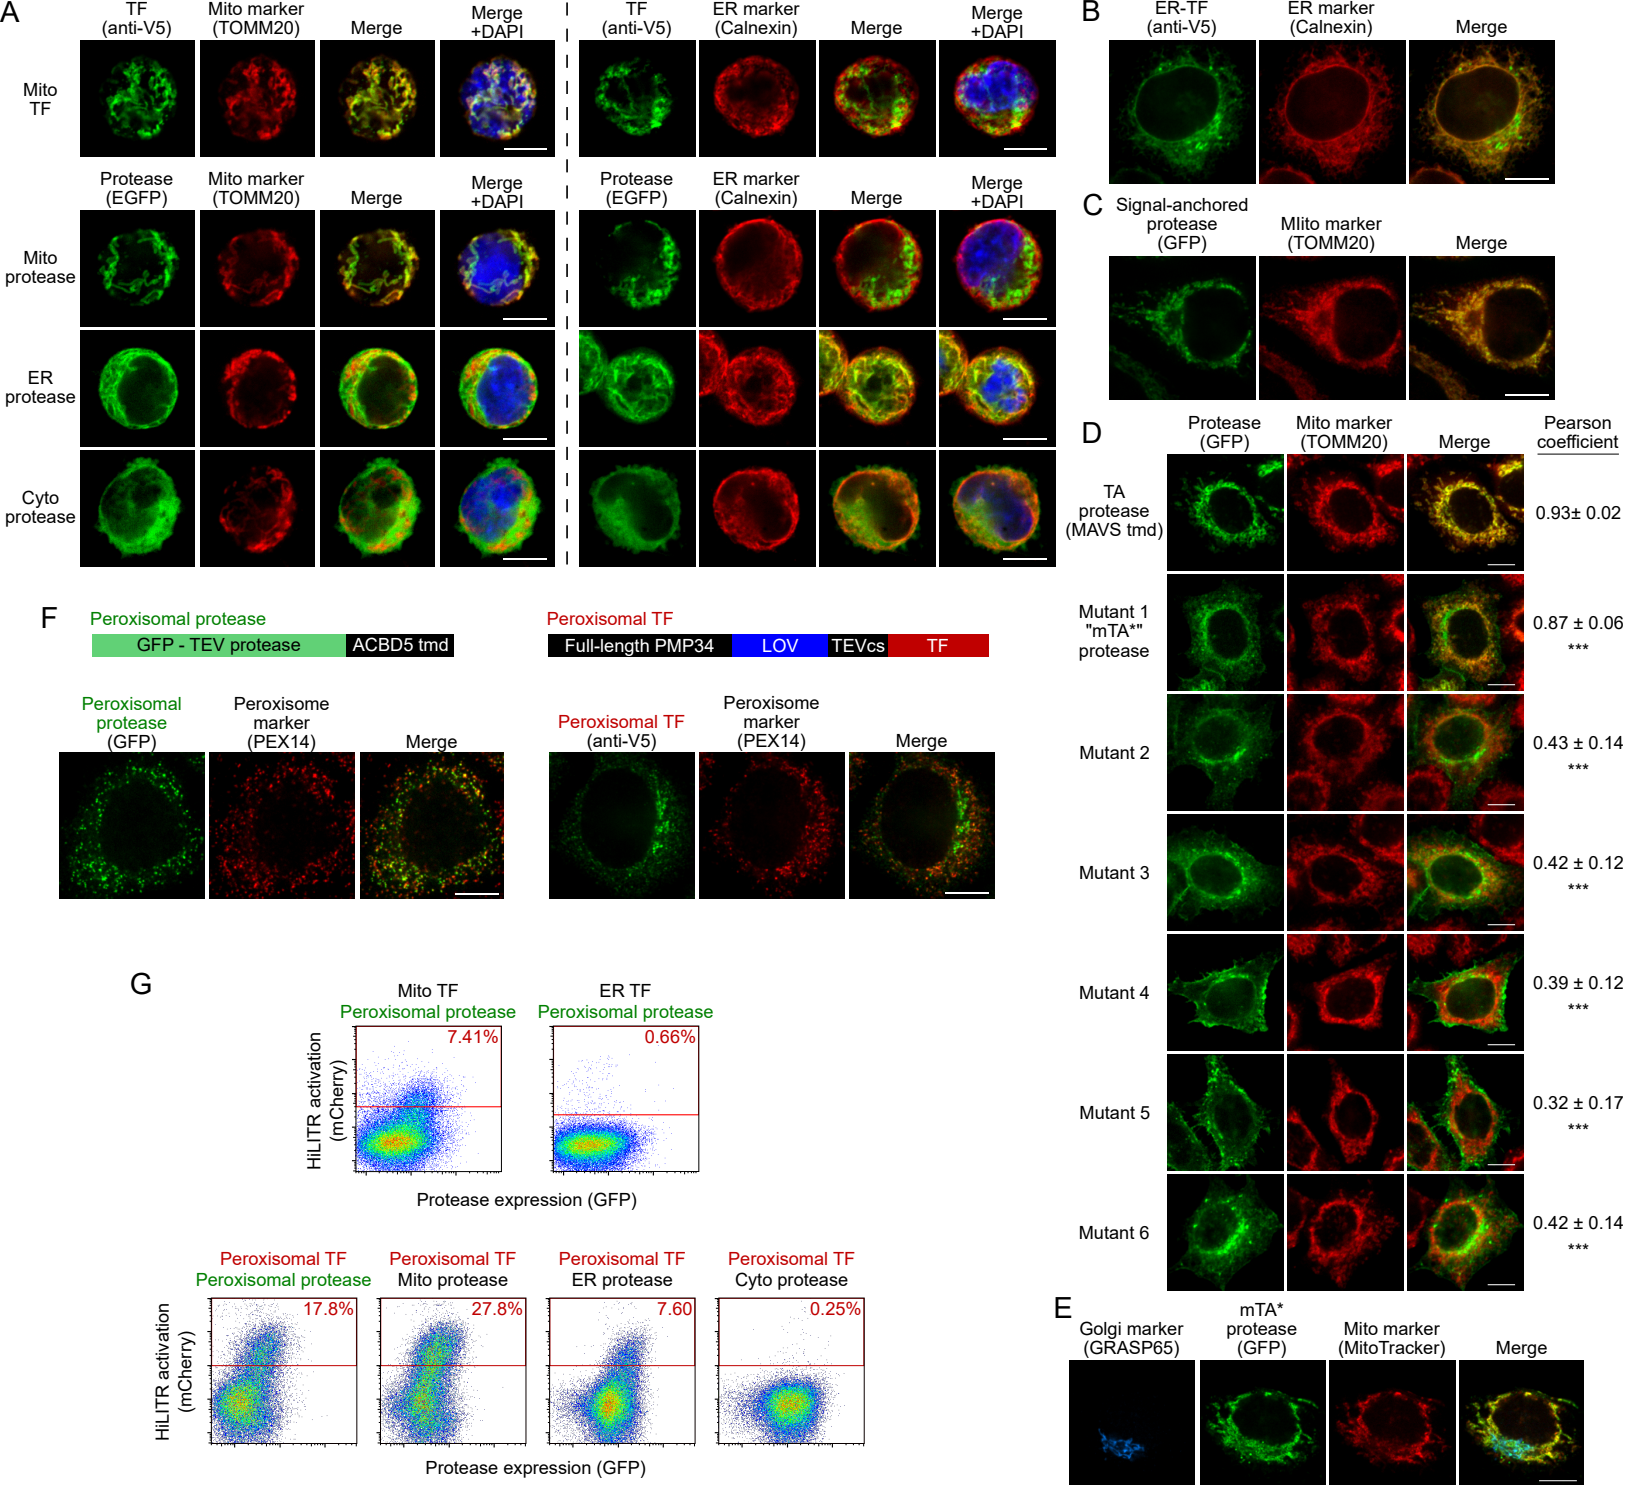

Supplement: supp [file elife_poa_e69142_Figure_1_figure_supplement_4.pdf › elife_poa_e69142_Figure_1_figure_supplement_4.pdf]

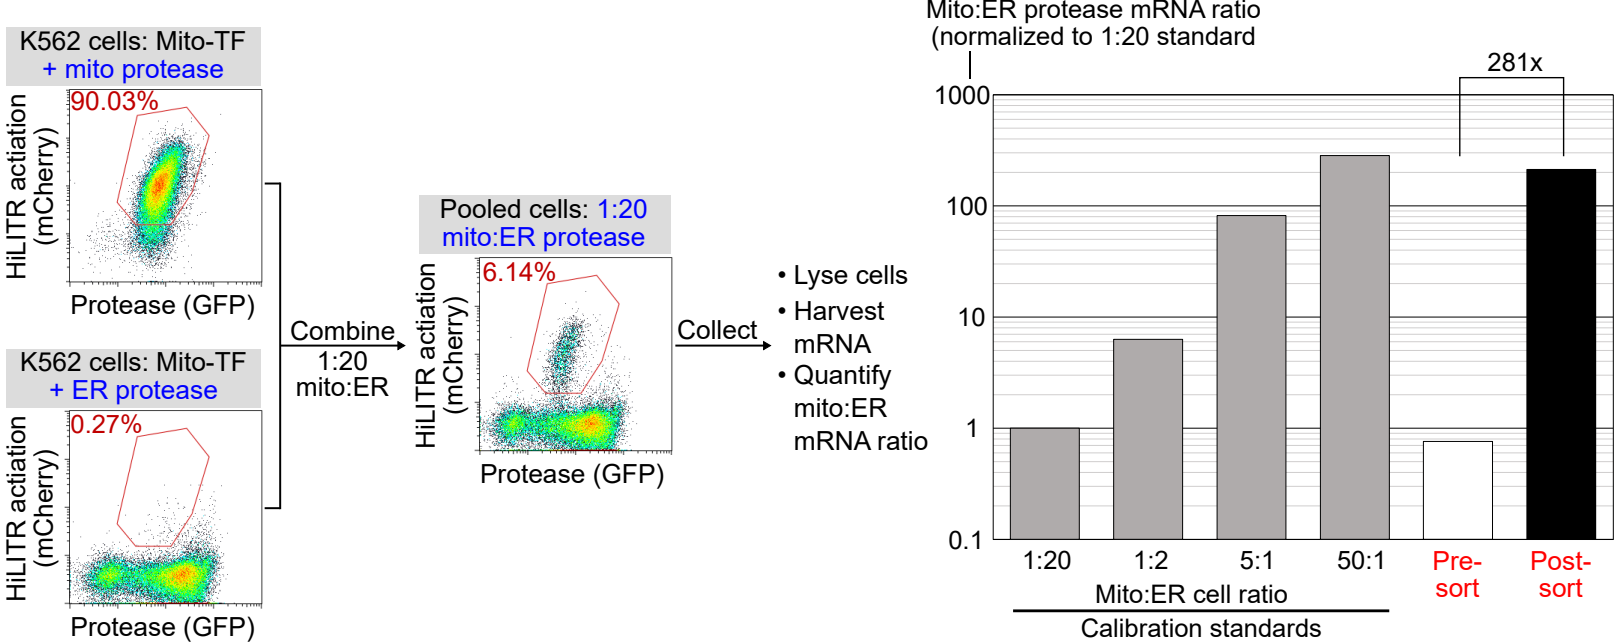

Supplement: supp [file elife_poa_e69142_Figure_1_figure_supplement_5.pdf › elife_poa_e69142_Figure_1_figure_supplement_5.pdf]

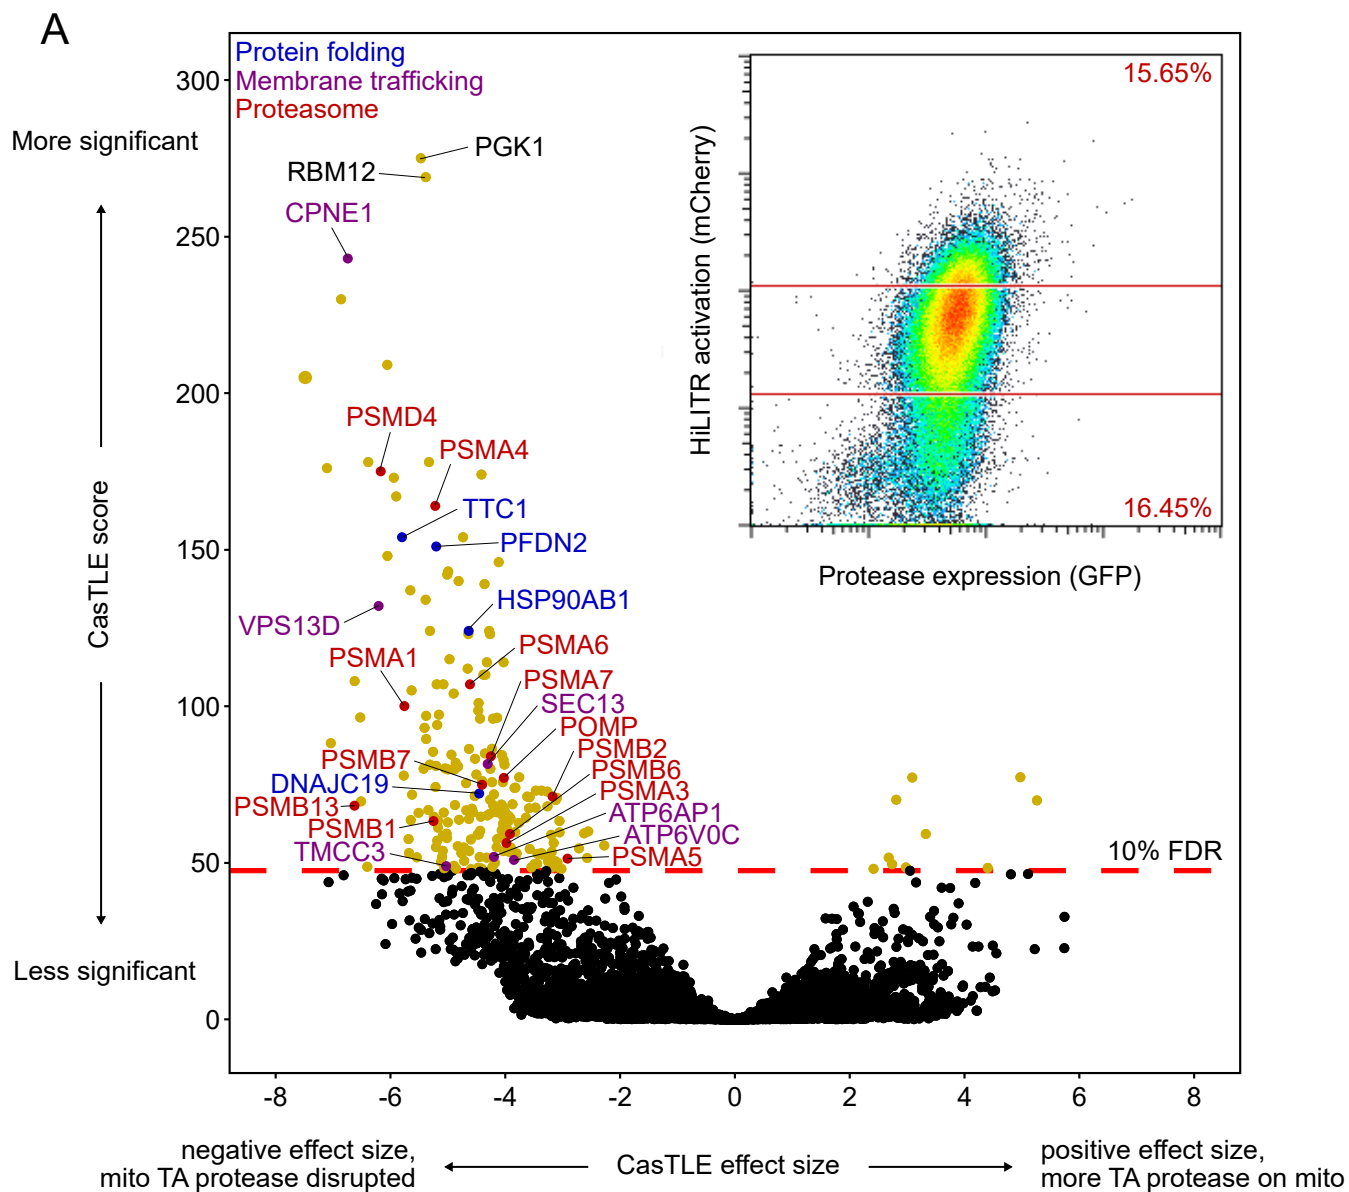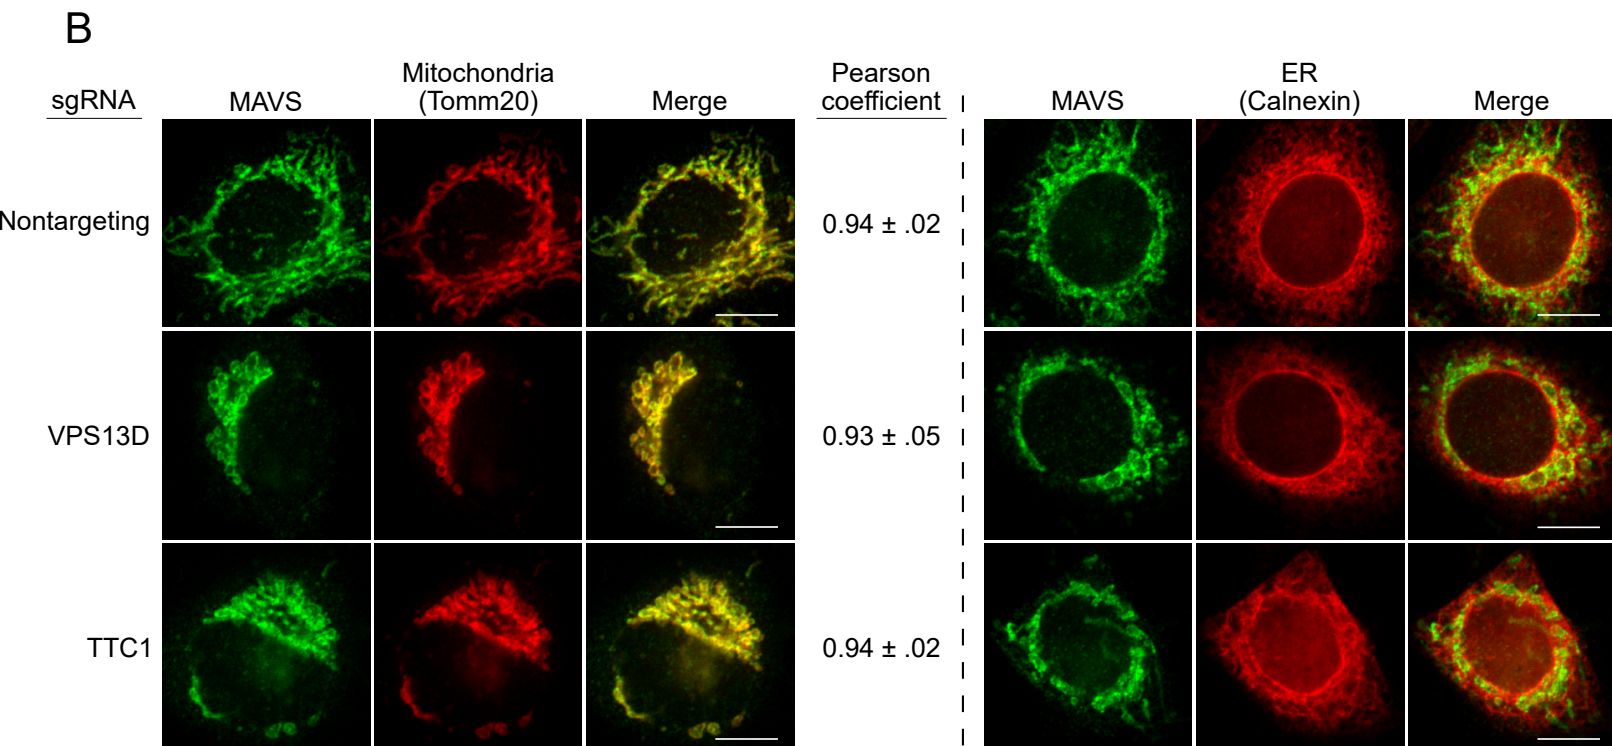

Supplement: supp [file elife_poa_e69142_Figure_2_figure_supplement_1.pdf › elife_poa_e69142_Figure_2_figure_supplement_1.pdf]

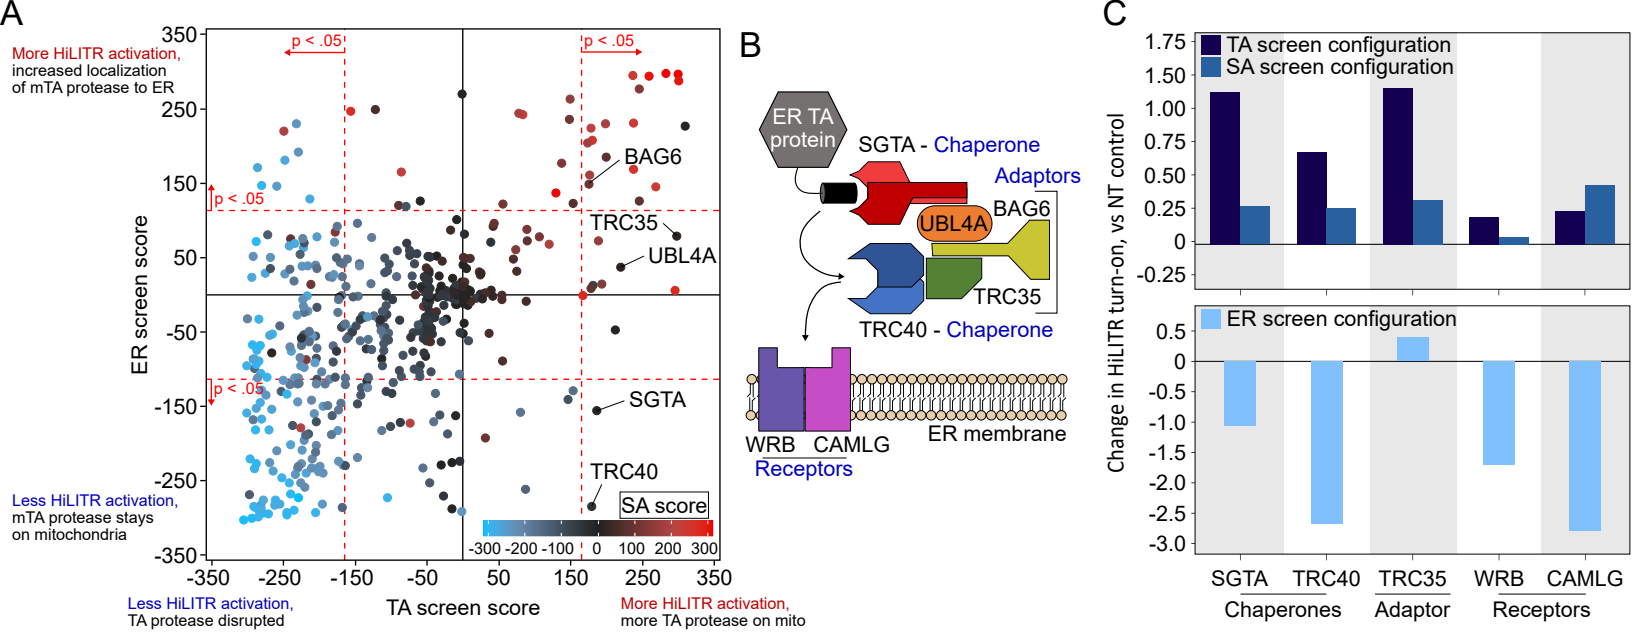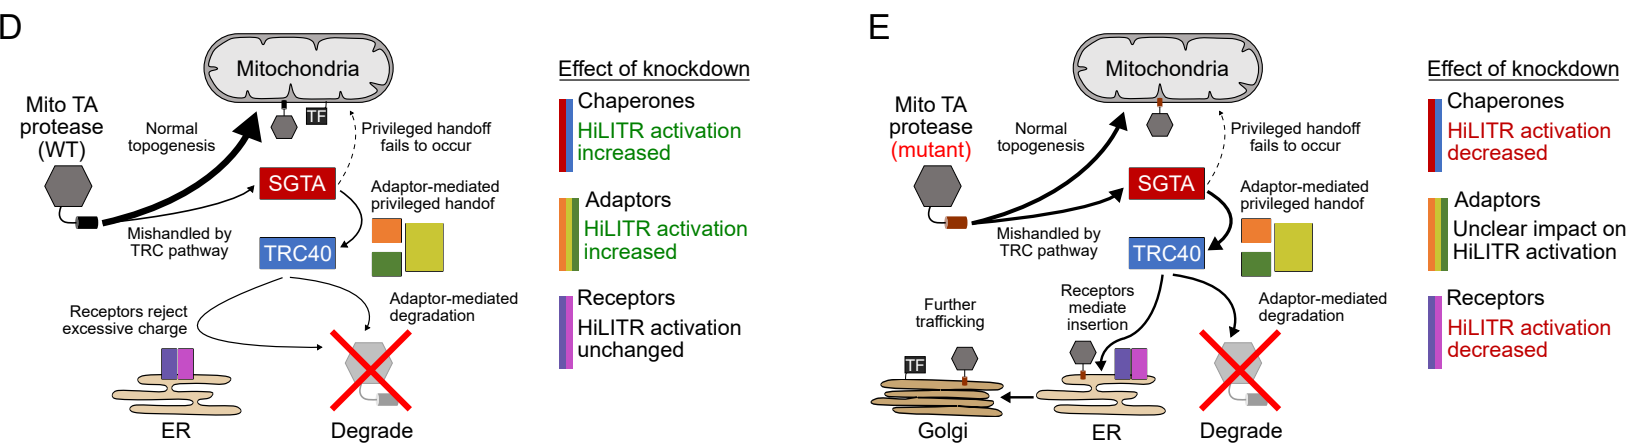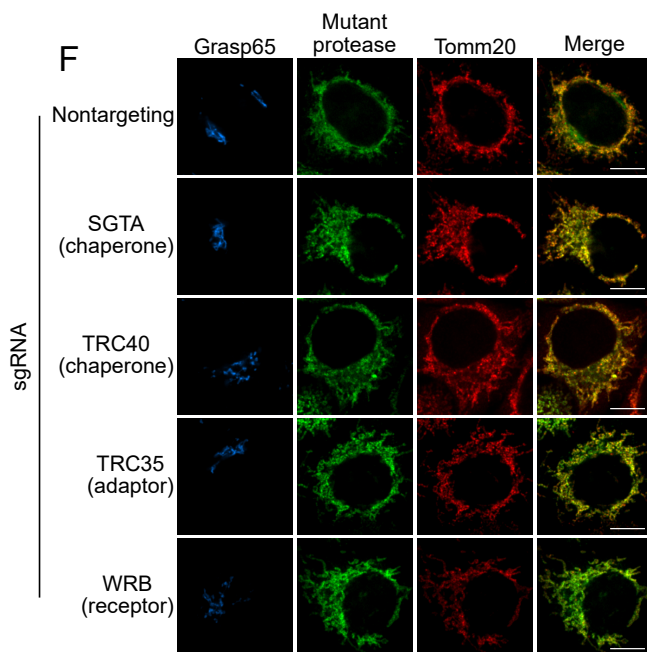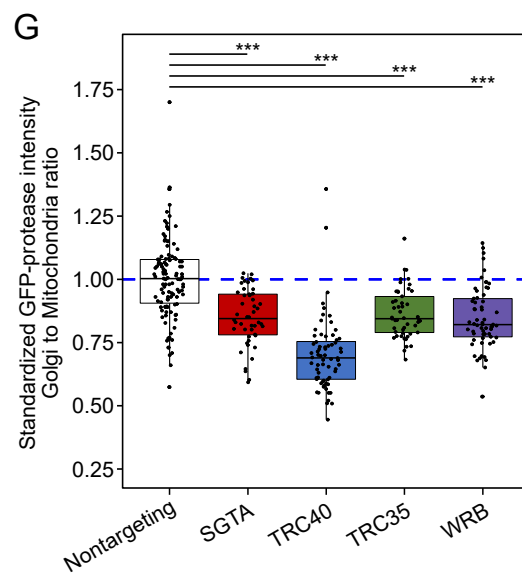

Supplement: supp [file elife_poa_e69142_Figure_3_figure_supplement_1.pdf › elife_poa_e69142_Figure_3_figure_supplement_1.pdf]

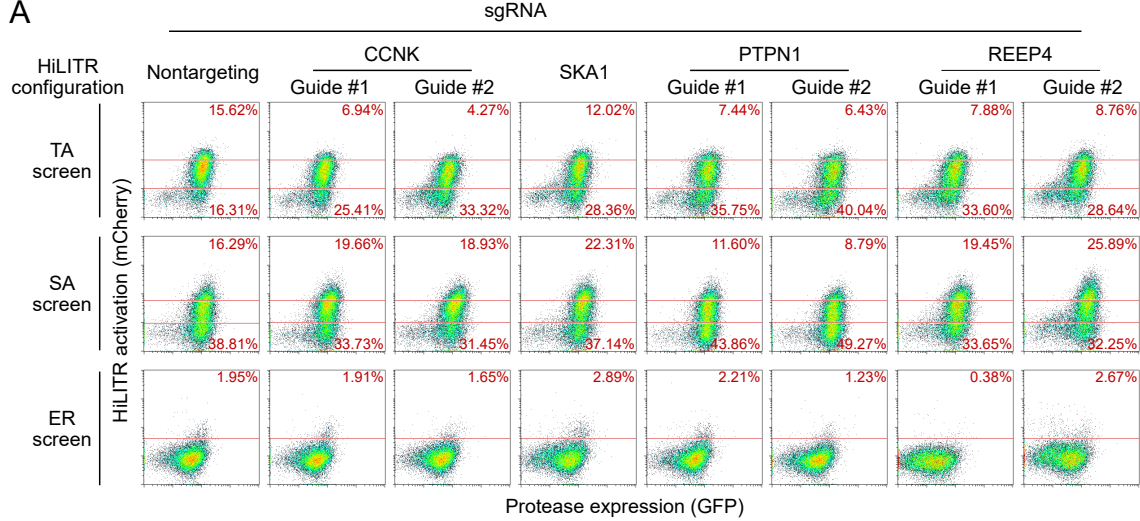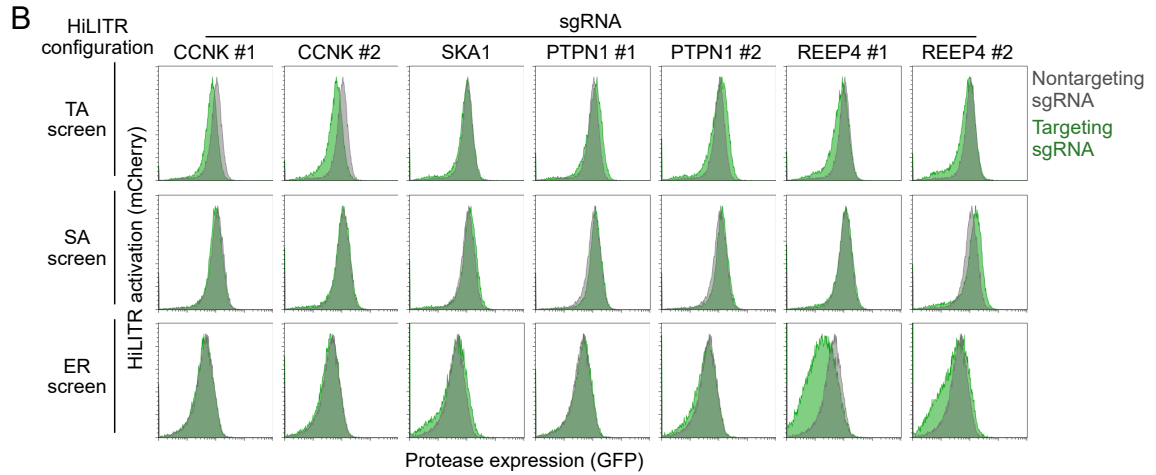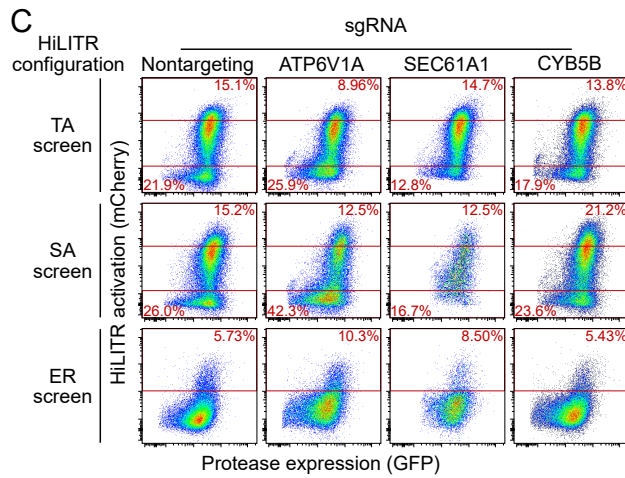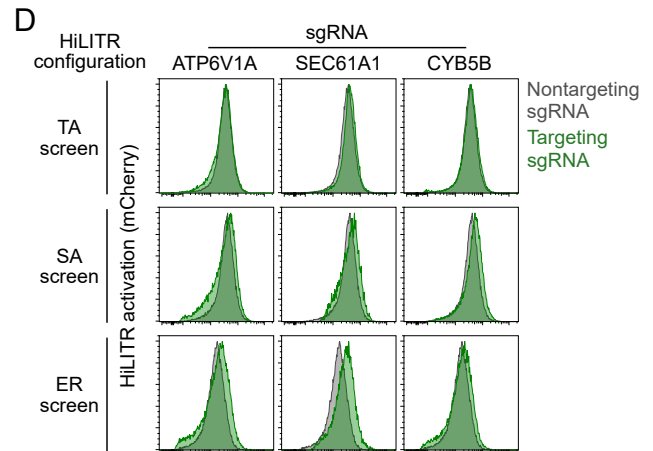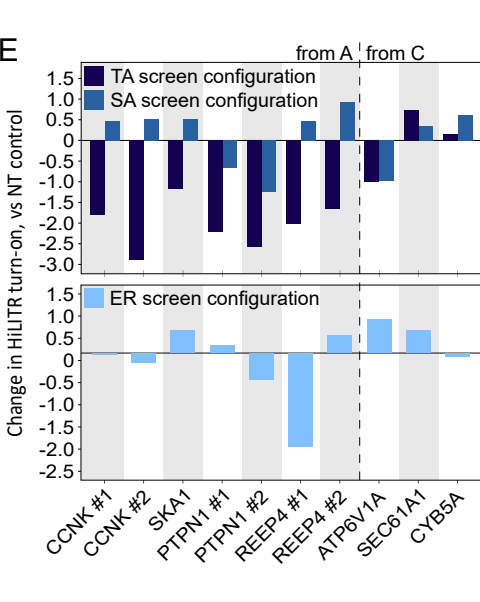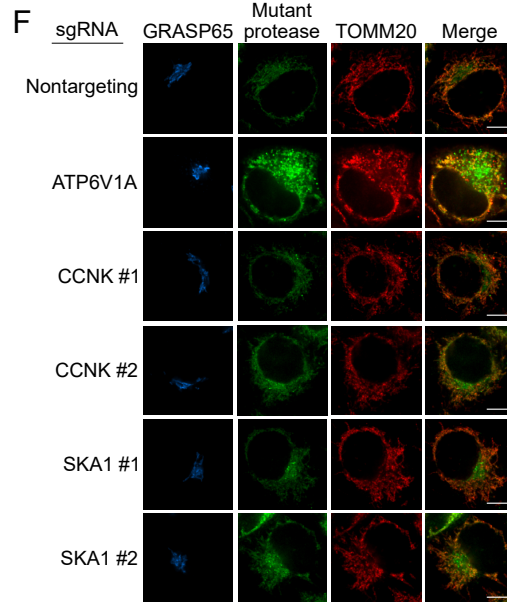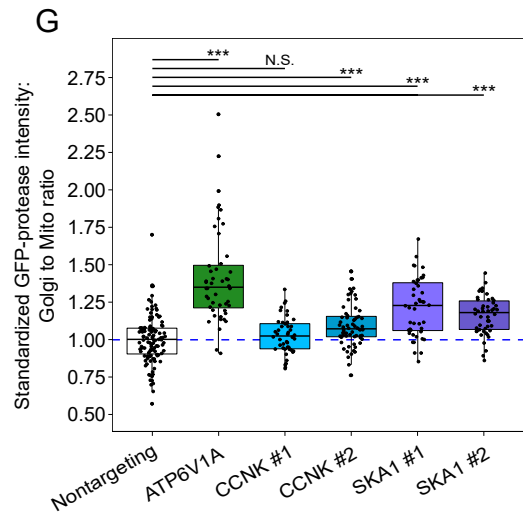

Supplement: supp [file elife_poa_e69142_Figure_3_figure_supplement_2.pdf › elife_poa_e69142_Figure_3_figure_supplement_2.pdf]

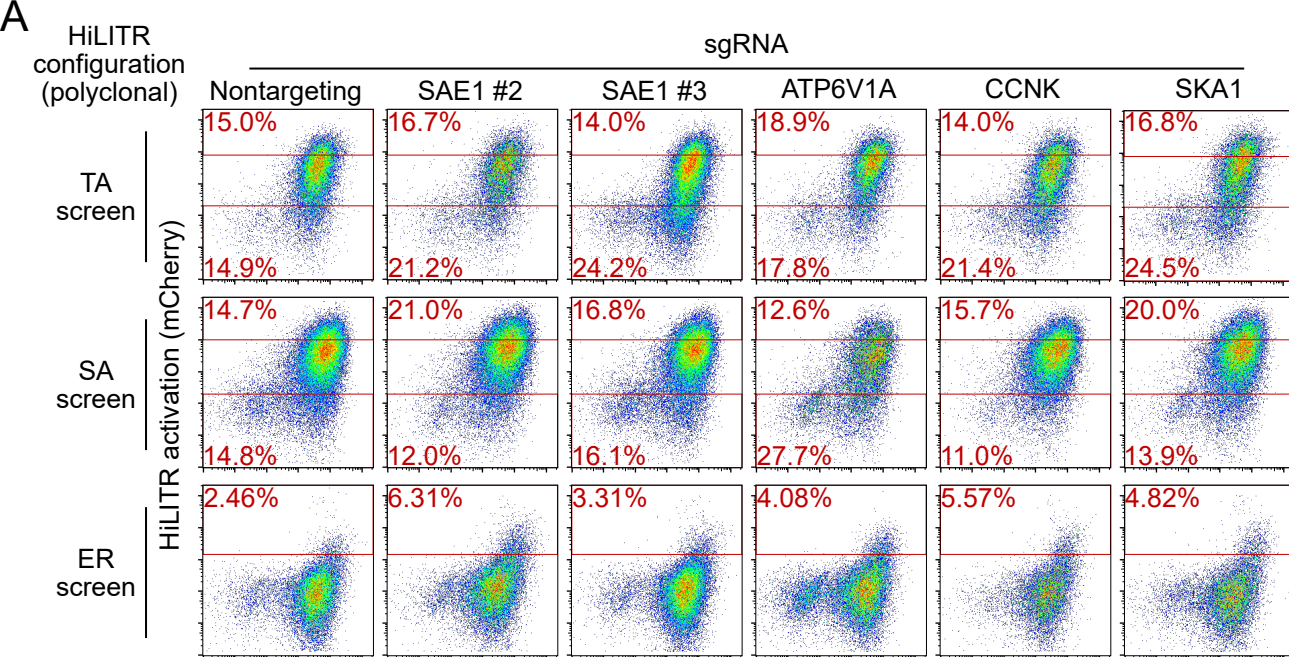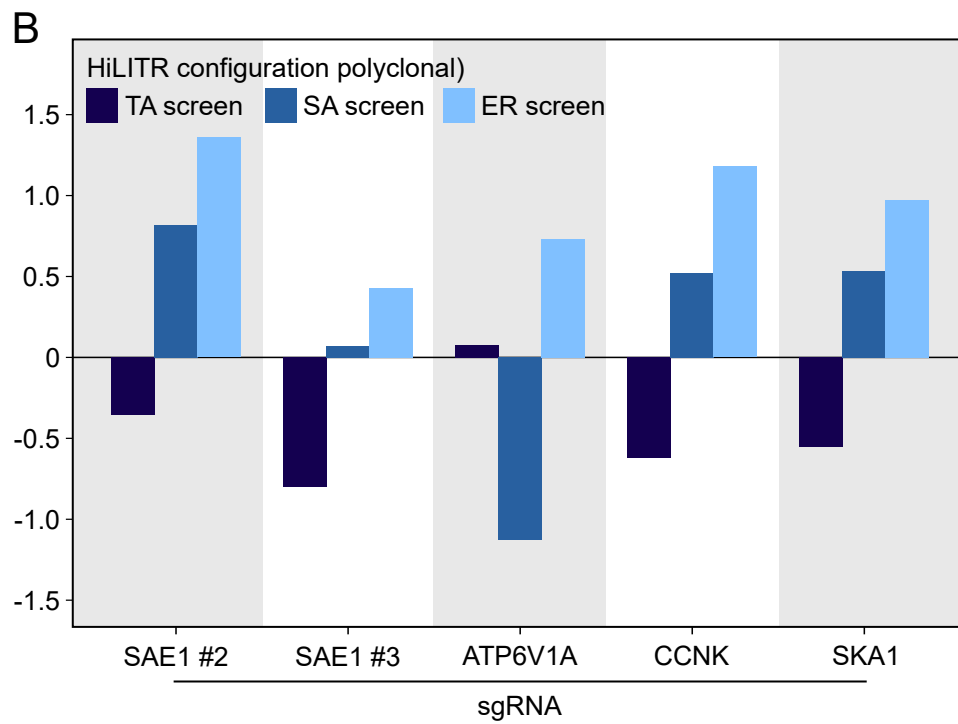

Supplement: supp [file elife_poa_e69142_Figure_3_figure_supplement_3.pdf › elife_poa_e69142_Figure_3_figure_supplement_3.pdf]

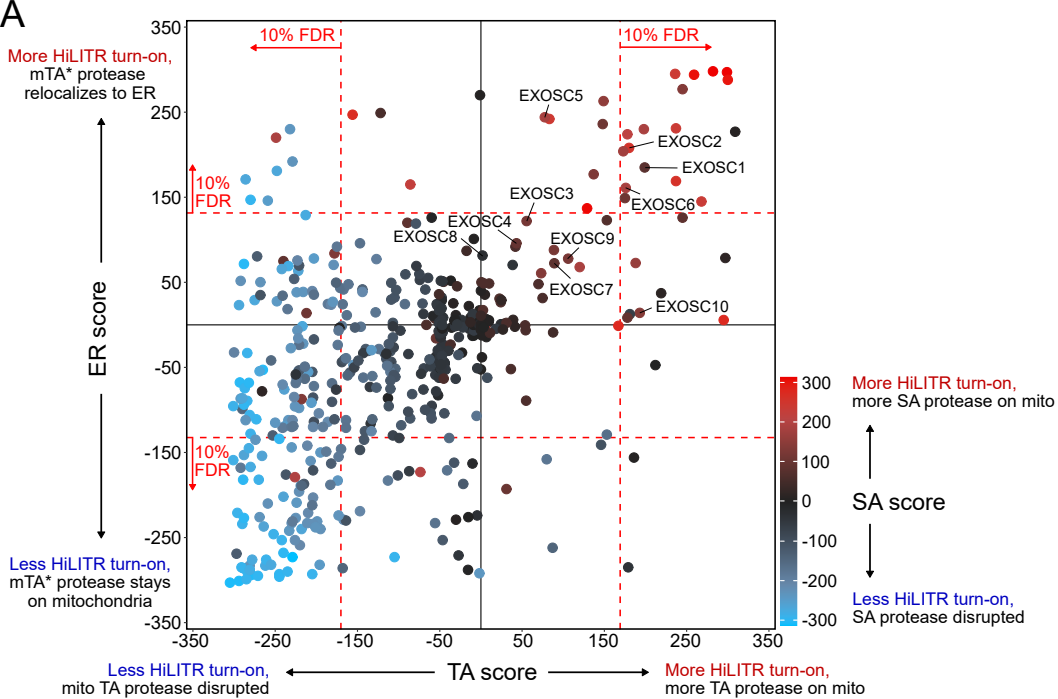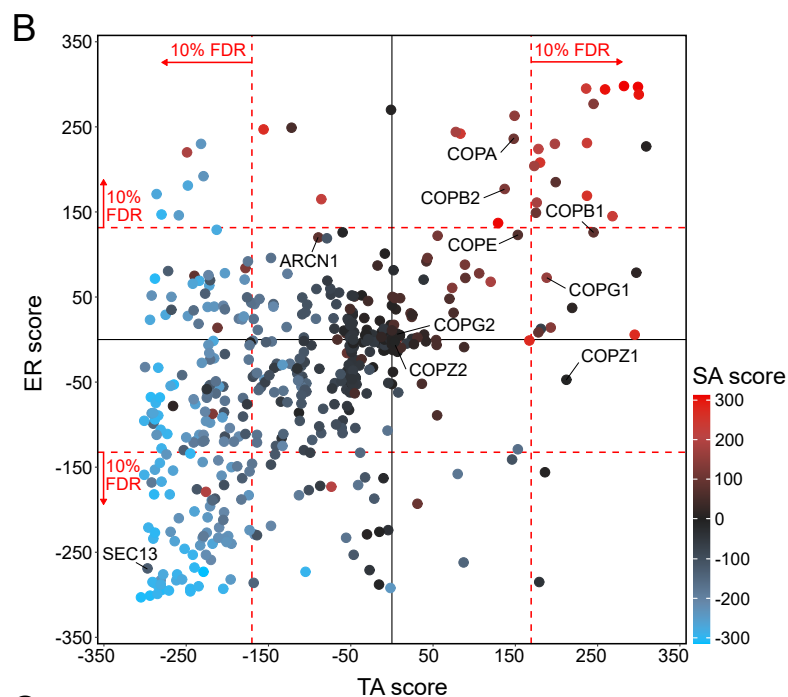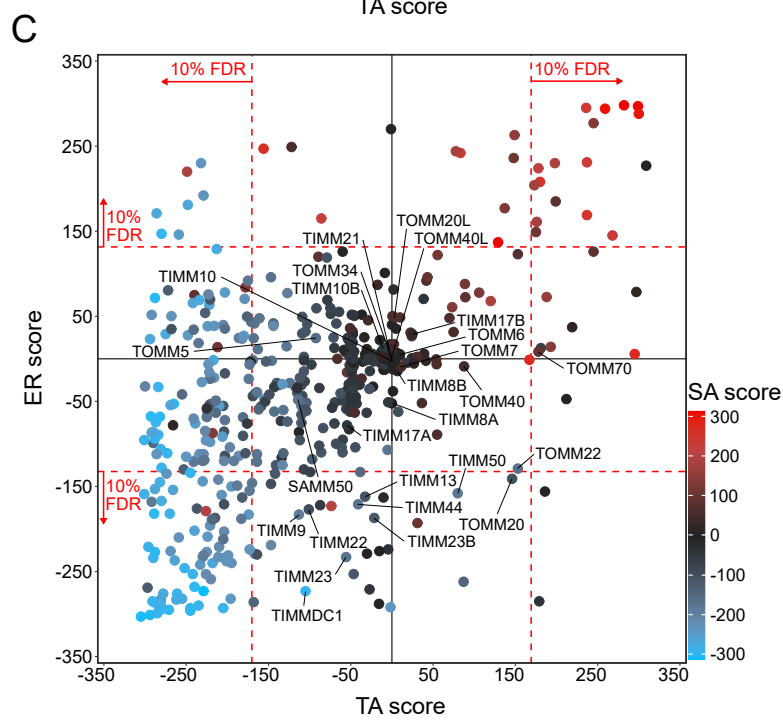

Supplement: supp [file elife_poa_e69142_Figure_3_figure_supplement_4.pdf › elife_poa_e69142_Figure_3_figure_supplement_4.pdf]

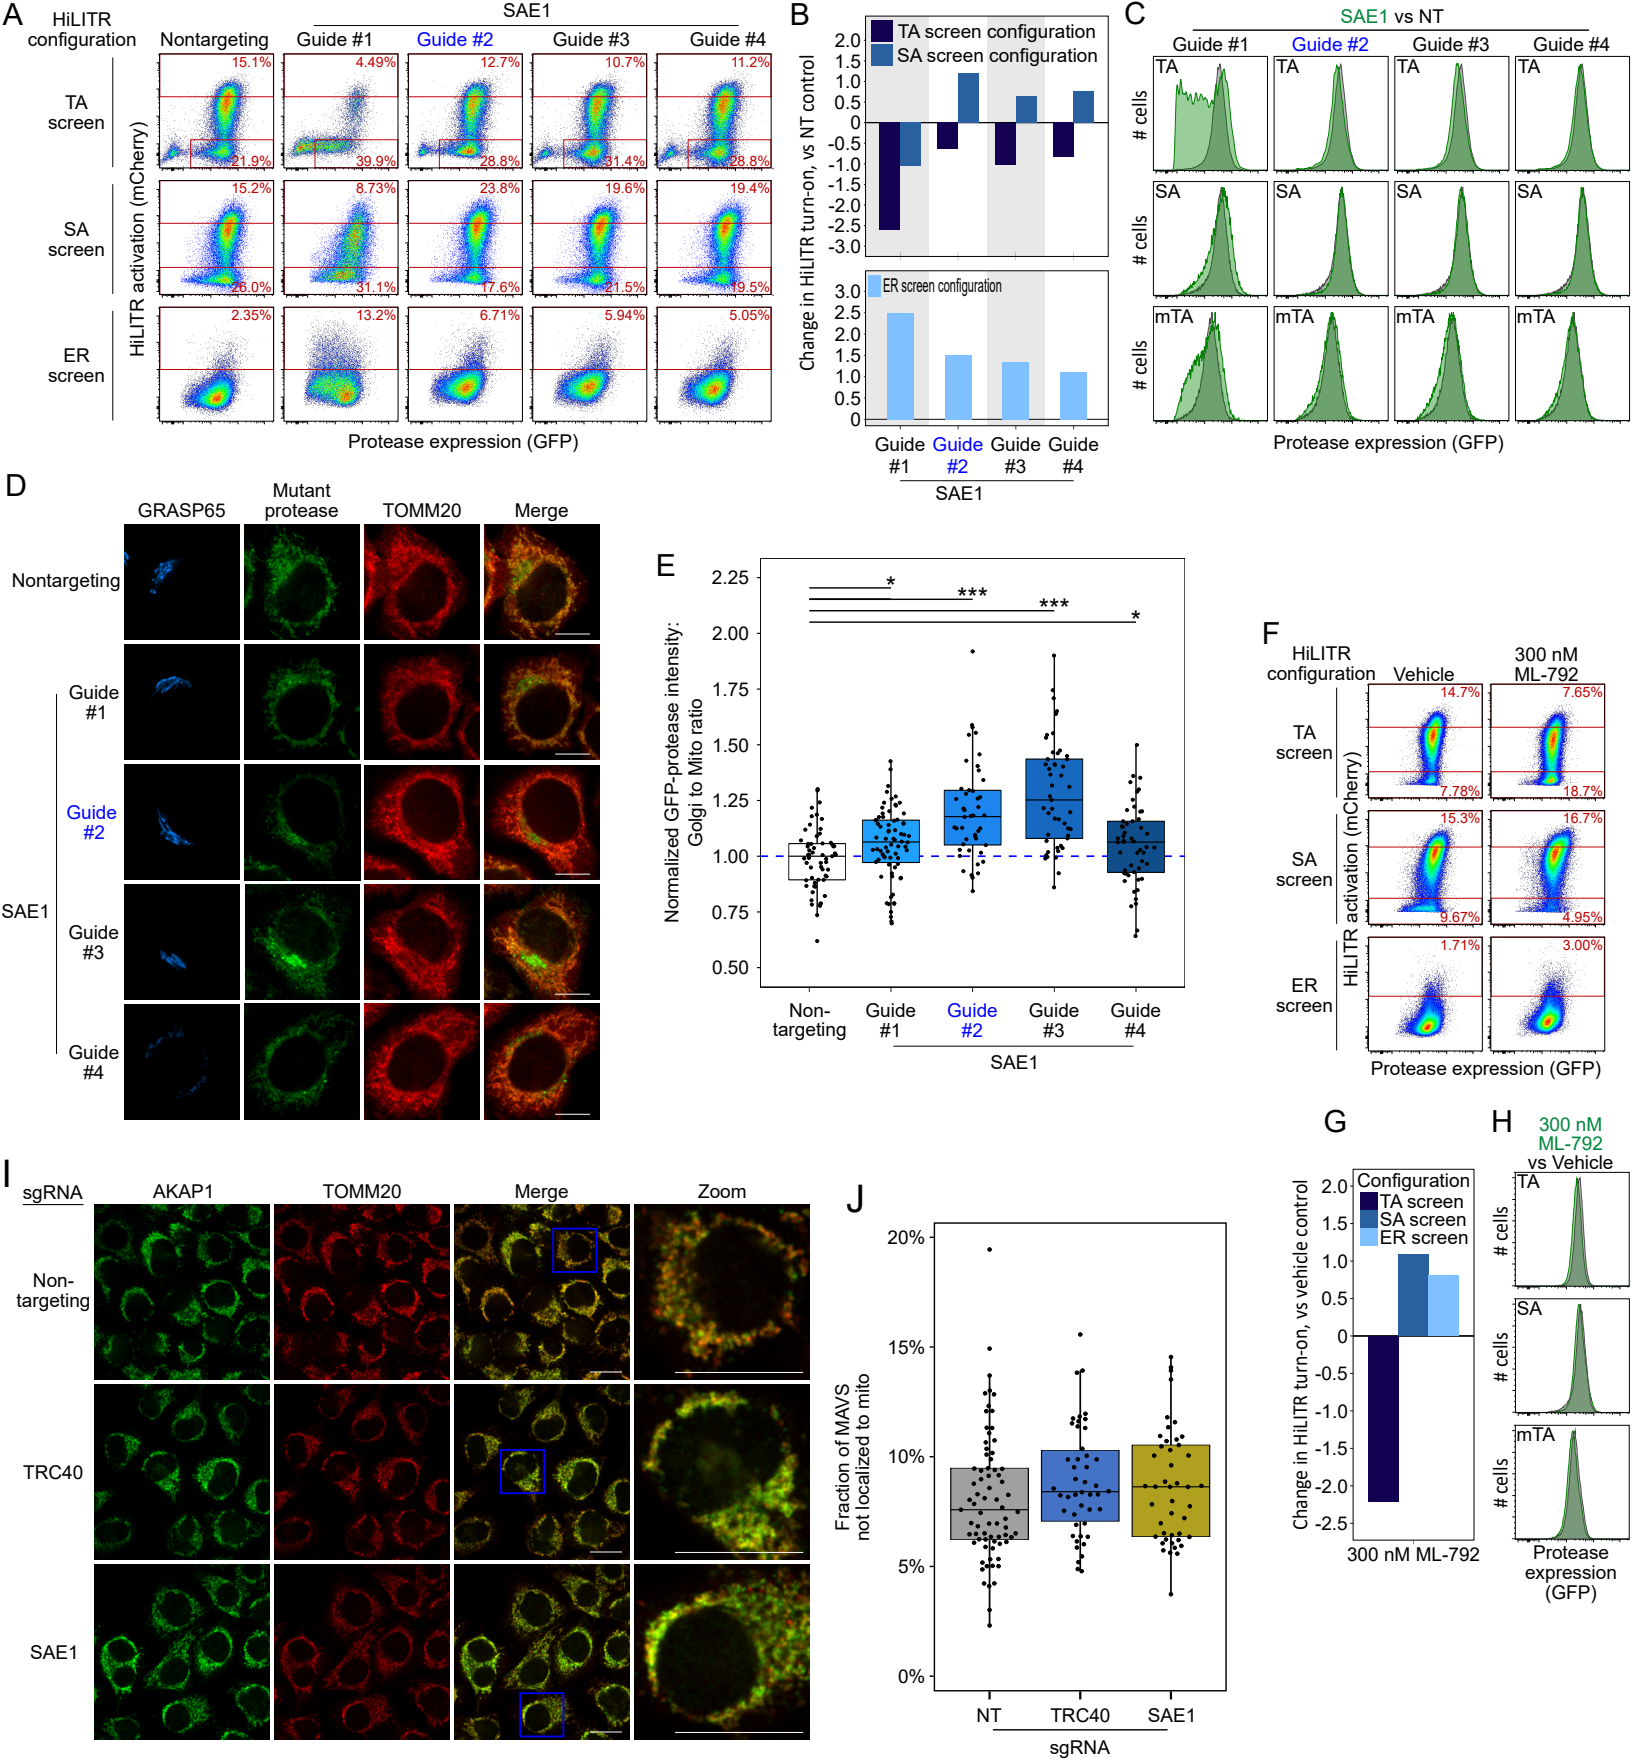

Supplement: supp [file elife_poa_e69142_Figure_4_figure_supplement_1.pdf › elife_poa_e69142_Figure_4_figure_supplement_1.pdf]

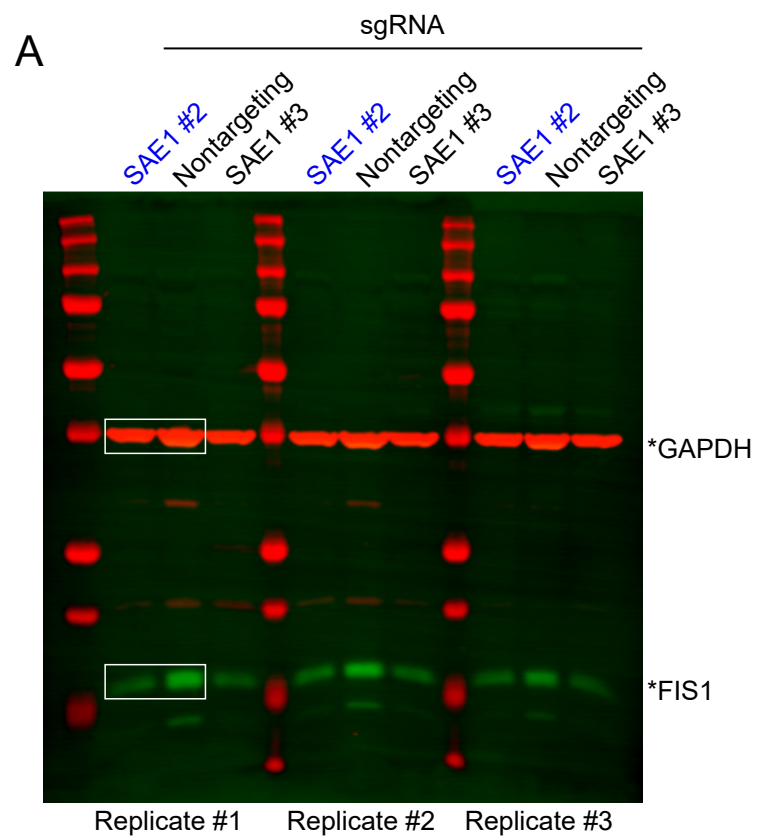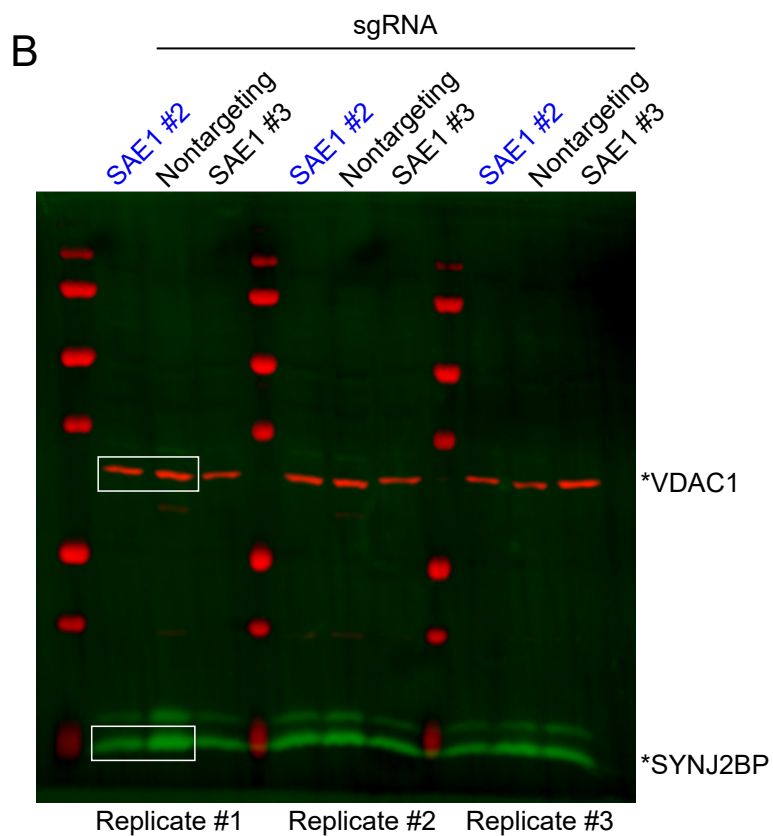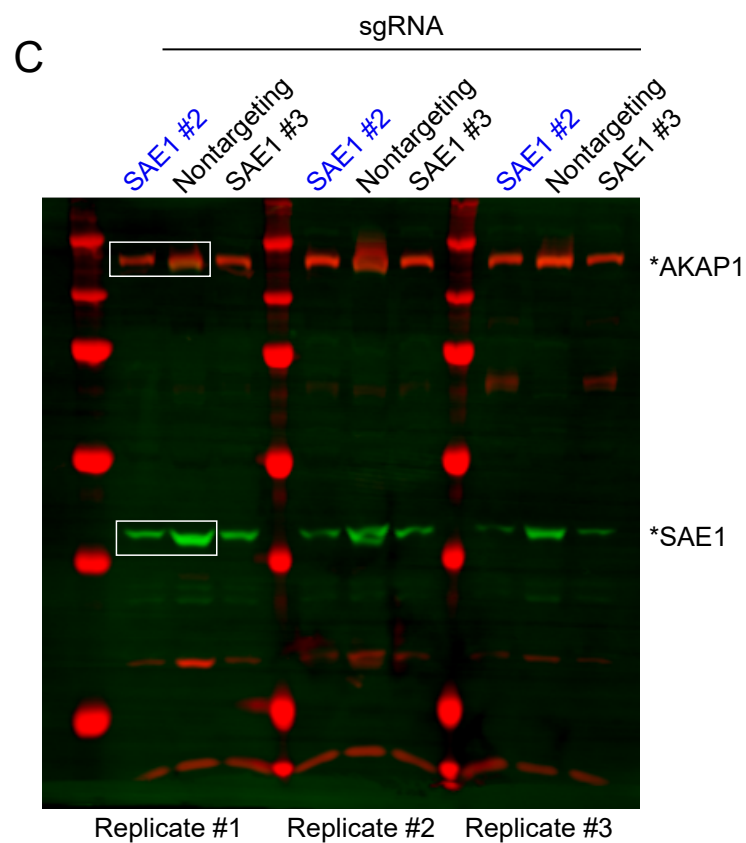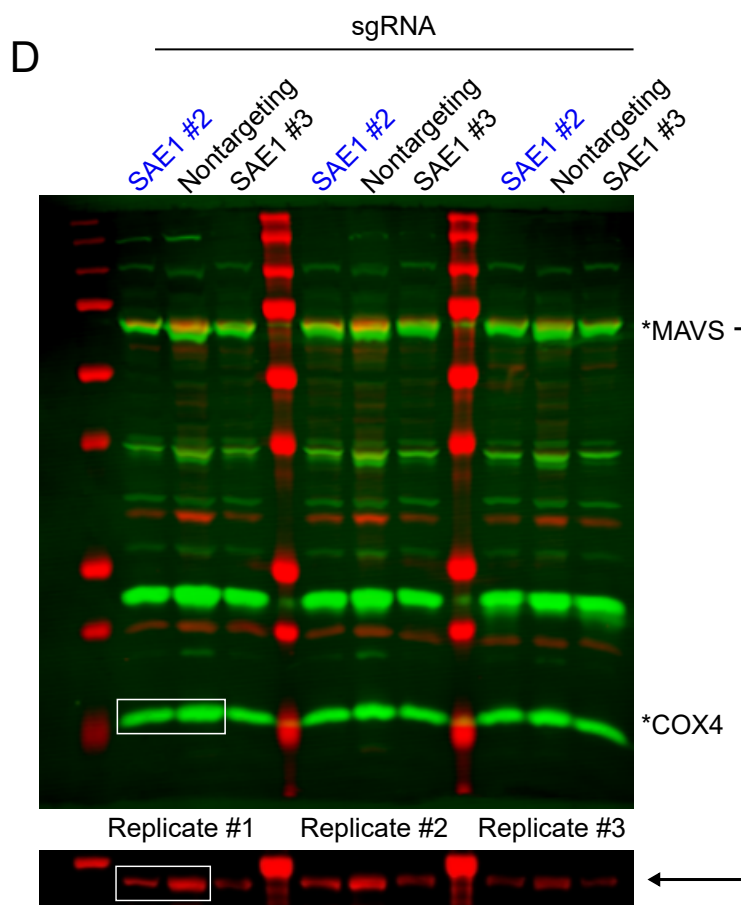

Supplement: supp [file elife_poa_e69142_Figure_5_figure_supplement_1.pdf › elife_poa_e69142_Figure_5_figure_supplement_1.pdf]

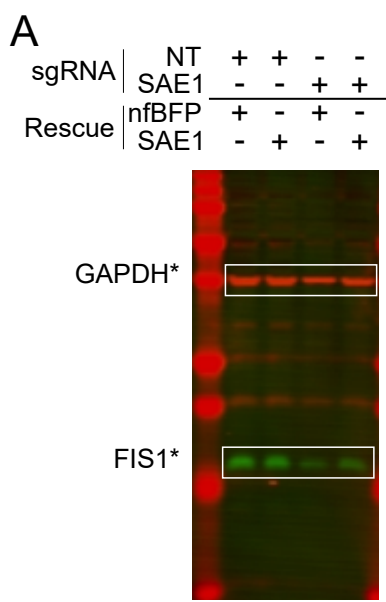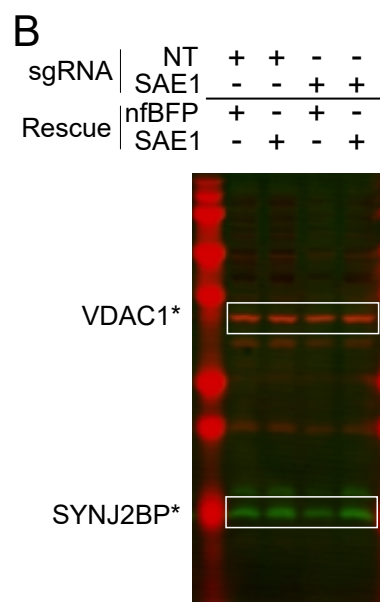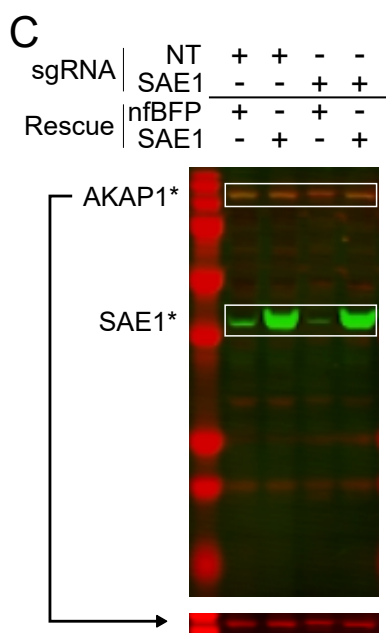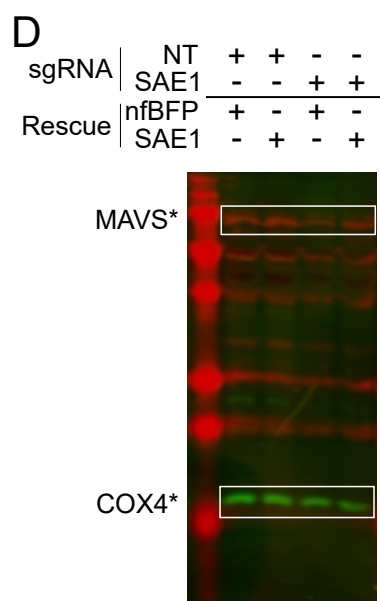

Supplement: supp [file elife_poa_e69142_Figure_5_figure_supplement_2.pdf › elife_poa_e69142_Figure_5_figure_supplement_2.pdf]

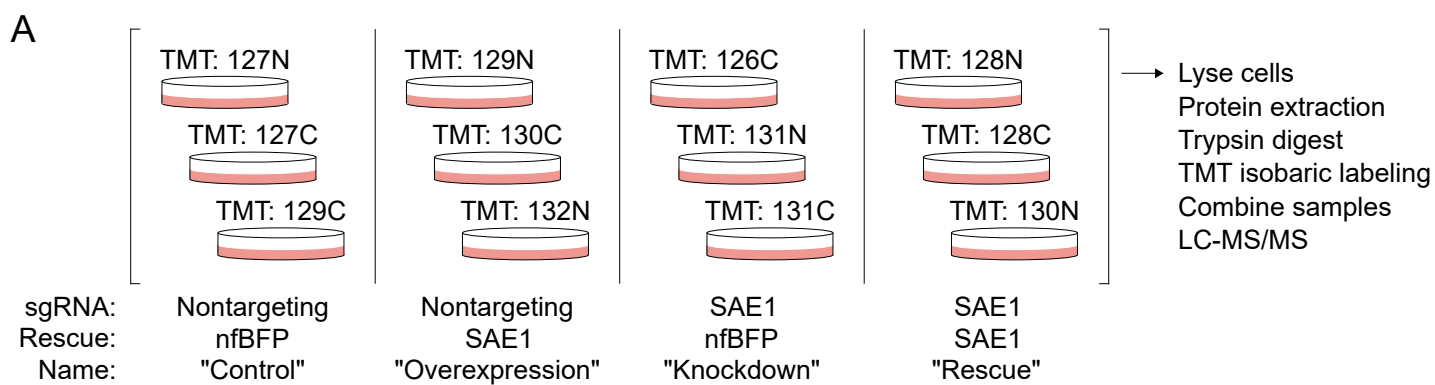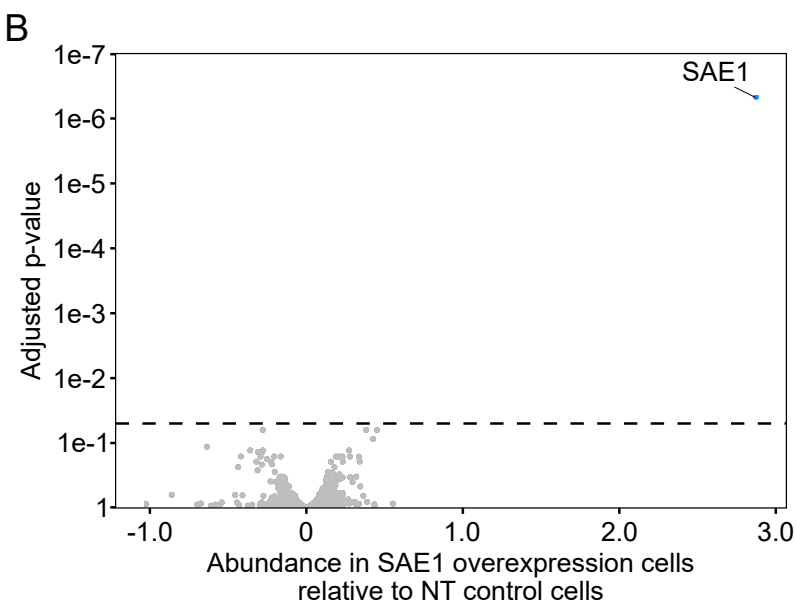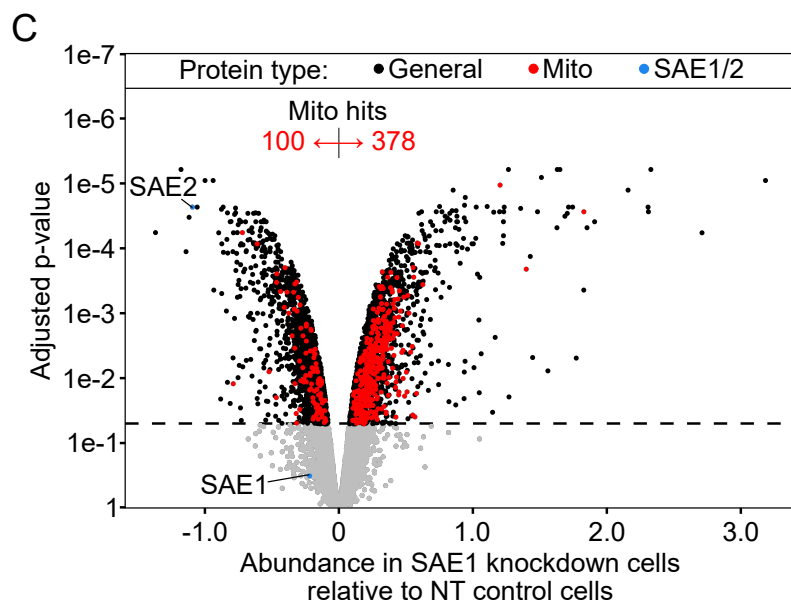

Supplement: supp [file elife_poa_e69142_Figure_5_figure_supplement_3.pdf › elife_poa_e69142_Figure_5_figure_supplement_3.pdf]

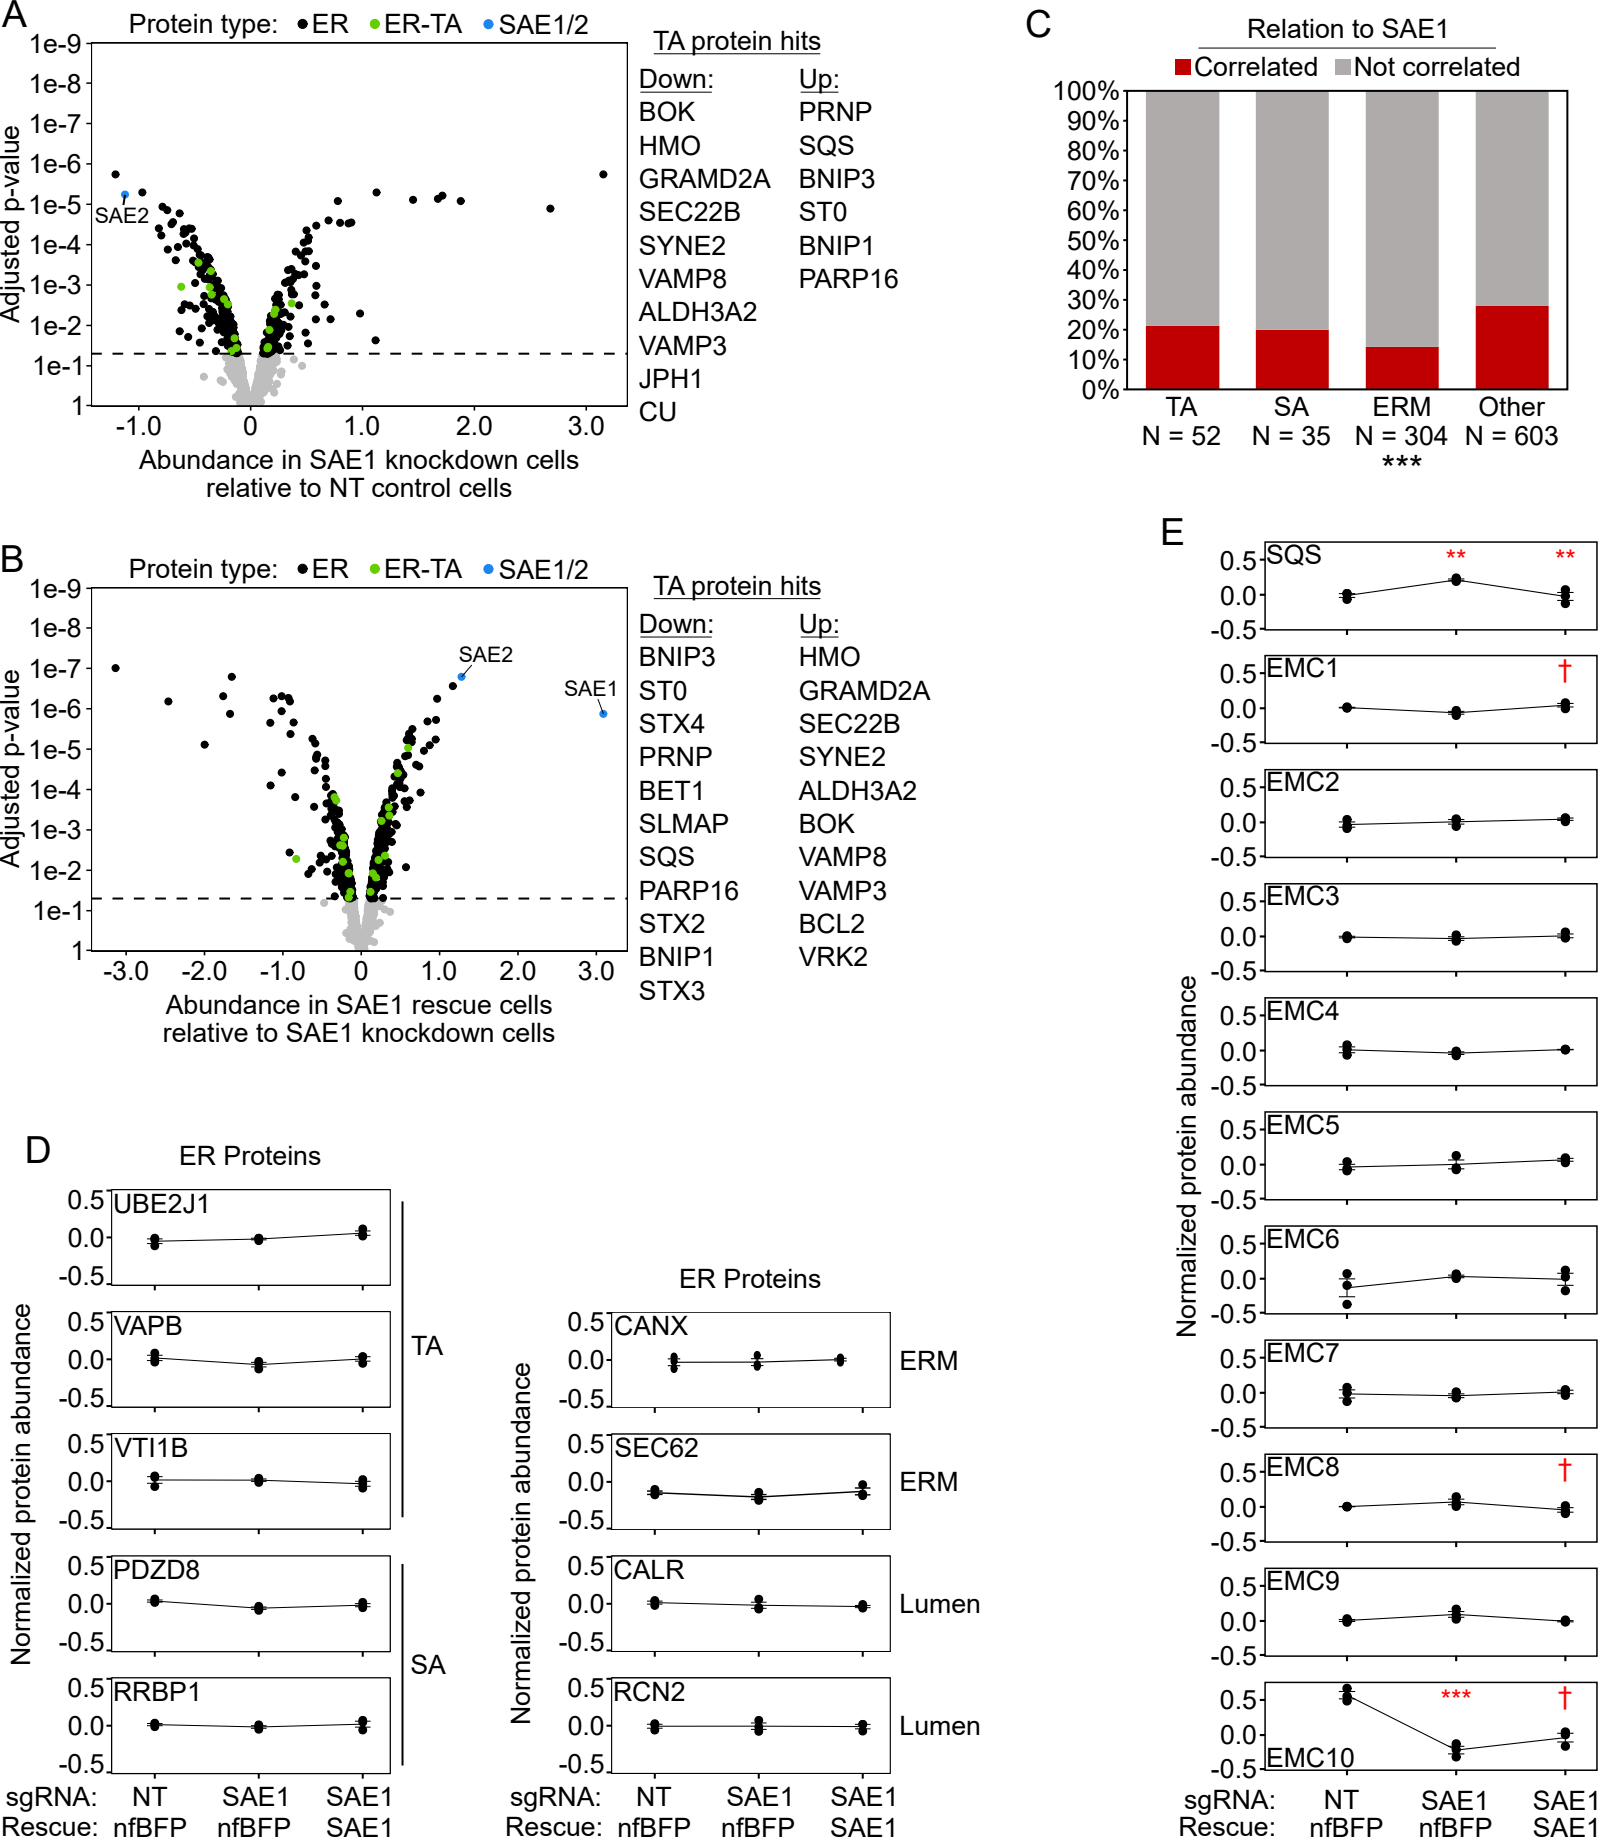

Supplement: supp [file elife_poa_e69142_Figure_5_figure_supplement_5.pdf › elife_poa_e69142_Figure_5_figure_supplement_5.pdf]

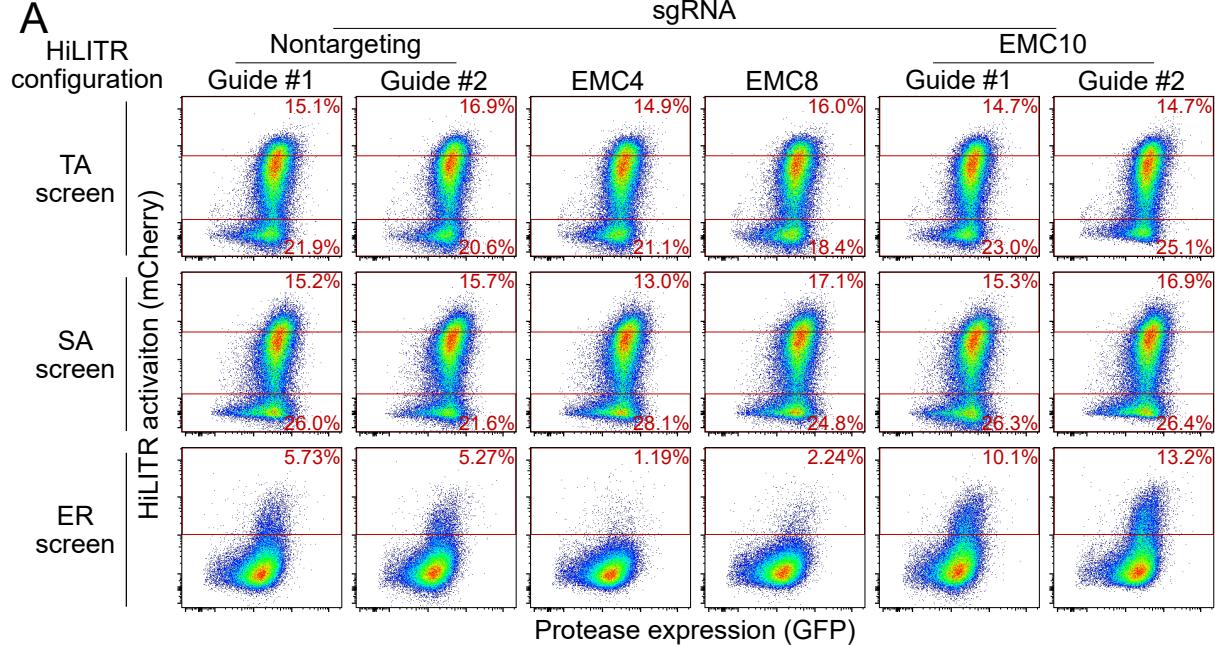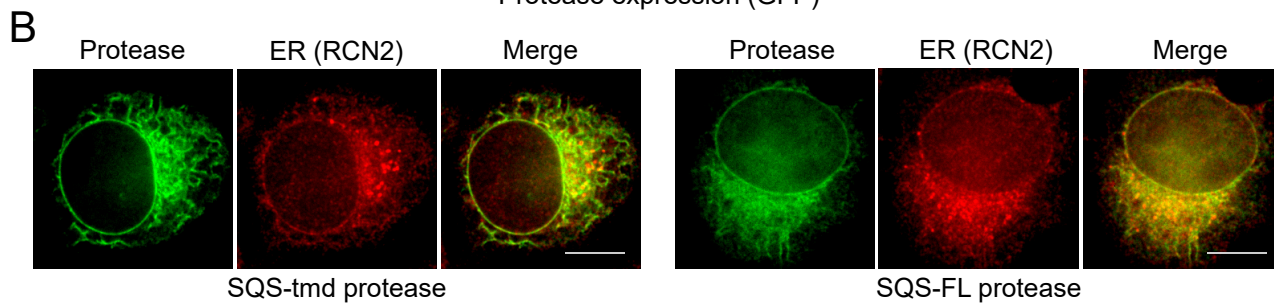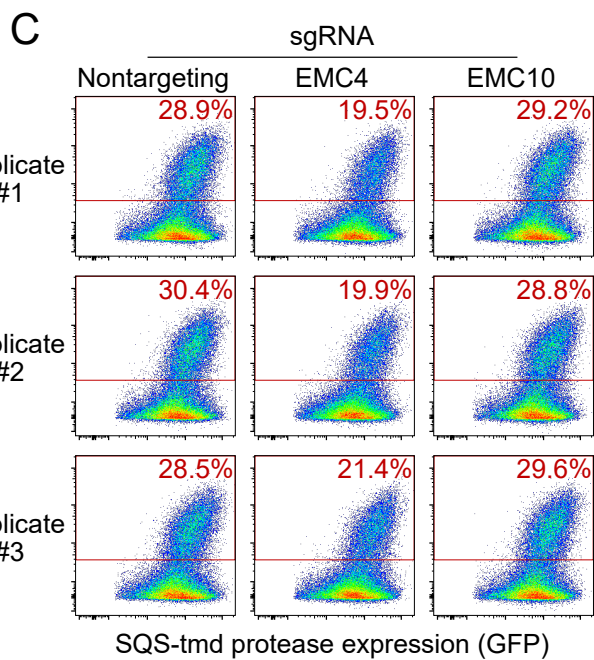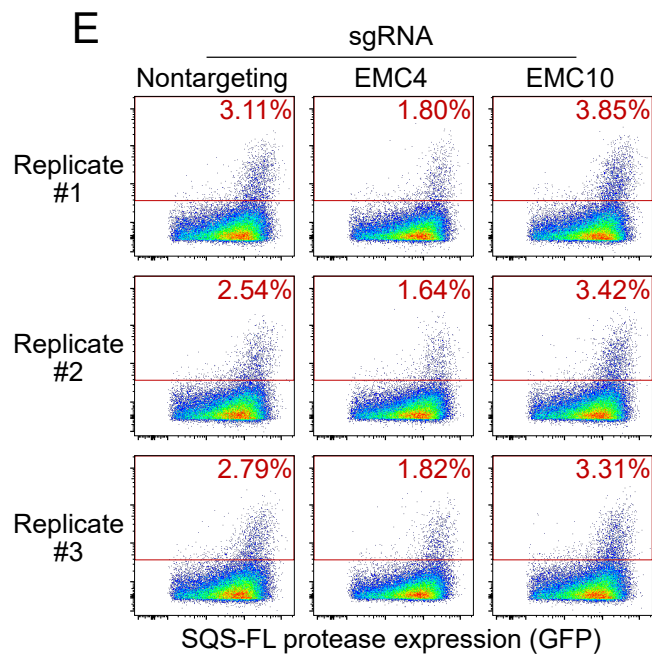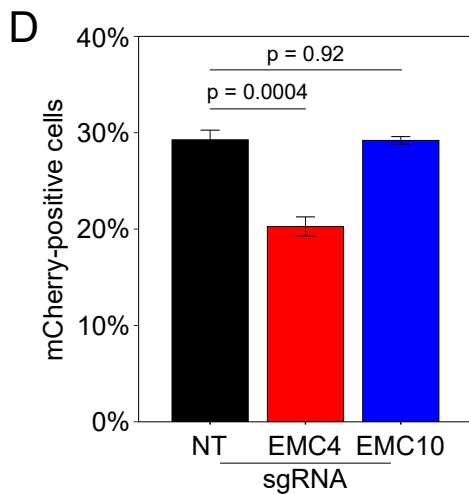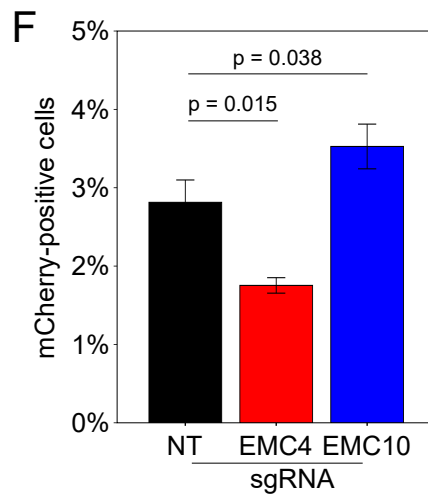

Supplement: supp [file elife_poa_e69142_Figure_6_figure_supplement_1.pdf › elife_poa_e69142_Figure_6_figure_supplement_1.pdf]

A

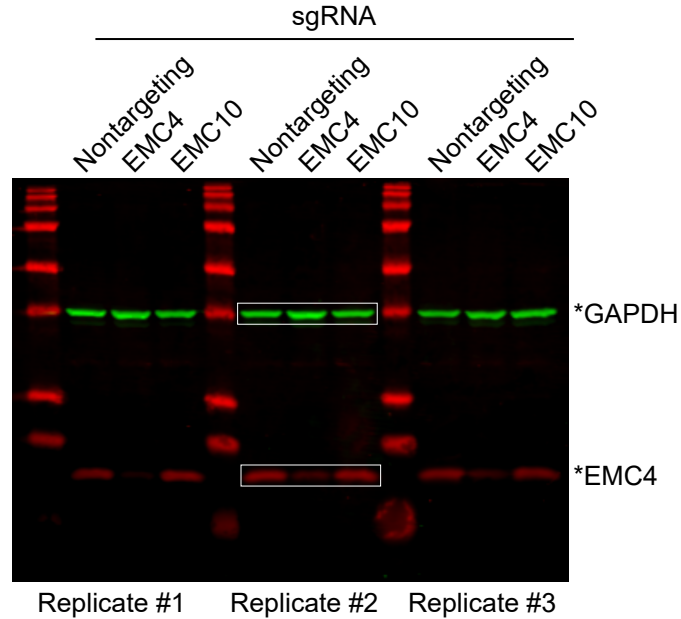

B

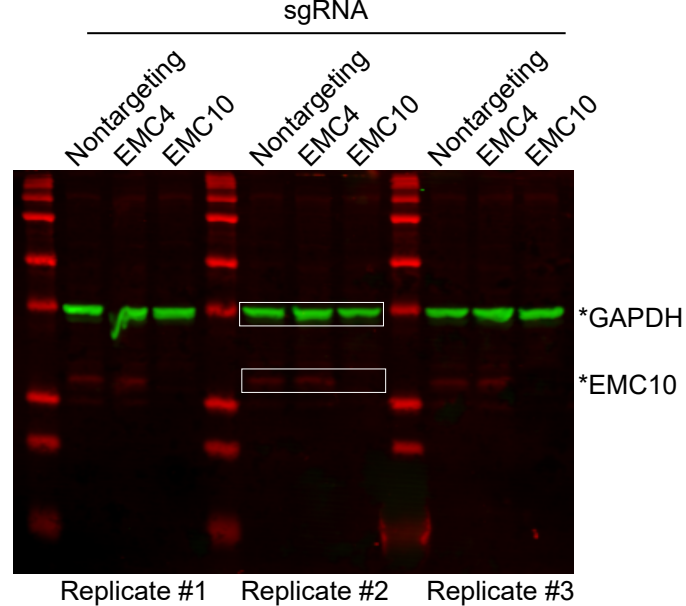

C

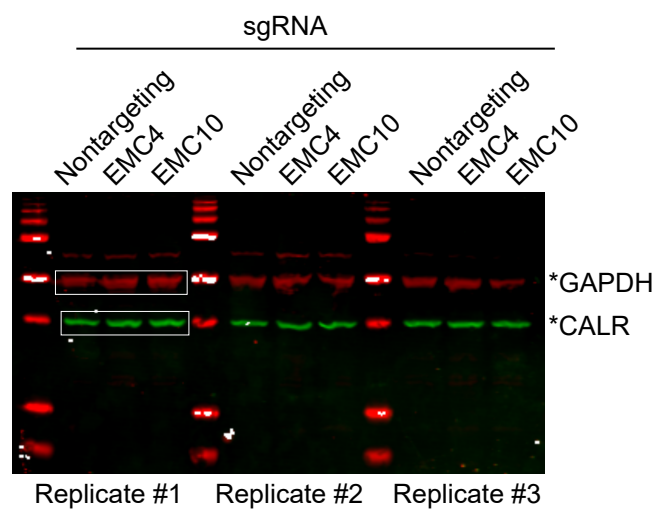

D

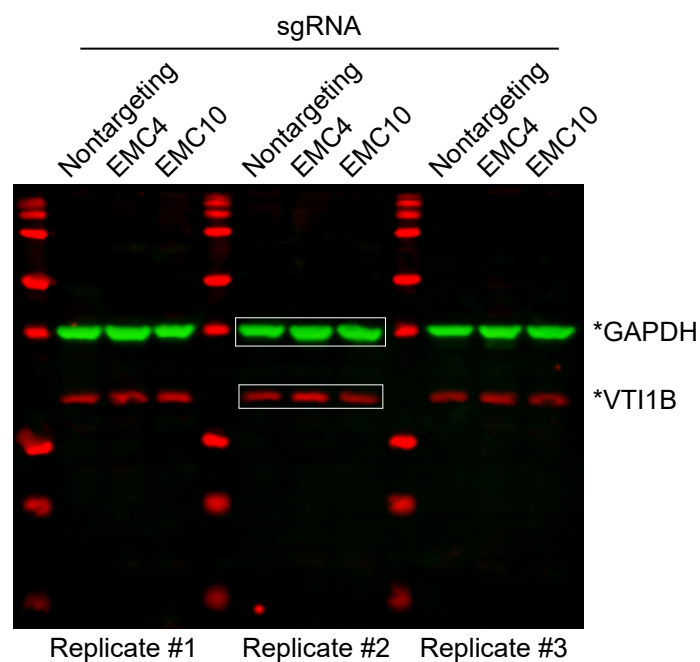

E

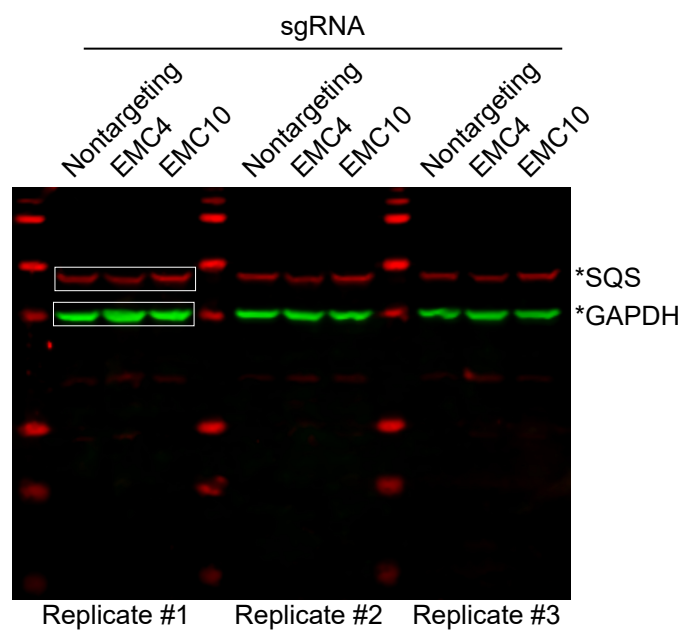

Supplement: supp [file elife_poa_e69142_Figure_6_figure_supplement_2.pdf › elife_poa_e69142_Figure_6_figure_supplement_2.pdf]
